# Supplementary material for: Role of MNX1-mediated Histone Modifications and PBX Gene Family in MNX1-induced Leukemogenesis
Source: Research Square preprint supplement (doi:10.21203/rs.3.rs-6480114/v1), 2025-09-25
Supplement: Supplementary file 1 [file 15d35cc9cf2072c3ce0632a6.xlsx]

## Sheet: MAST_MNX1_ATAC
Region	Start position of subregion relative to sequnces length	Sequence of subregion of containg motif match	Start position of motif match relative to sequnces length	Motif Index	Reverse complement	P-value	Match pattern
chr17:35258360-35259421	76	CTCTTACccgggcggtggtggcgcacgcctttaatcccagcacttgggaggcagaggcaggcggatttctgagtc	122	2	y	4.3e-10	+++++++++++++++
chr17:35258360-35259421	151	cgaggccagcctggtctacaaagtgagttccaggacagccagggctatacagagaaaccctgtctcgaaaaaaaa aaaAAAAAAAAAAAAAGTGTGTCTCTTTCACAACACTTCCAAAATTGTTACAAGCCATTTGGGAAATTCTAGGTC	218	1	n	3.7e-09	+++++++++++++++
chr17:35258360-35259421	301	AGCGATGACAACCTTTAAAGAAtttttaaaaaaagatttatgtatttattatacactgtagctgtcttcagacac	337	1	y	3.7e-05	+++ + + +++ ++
chr17:35258360-35259421	526	GATGTTATTAAAACCTTggcatggtgtccatgtctttaatcccagcactagggtggggtggggaccgaggcaggc	585	2	y	8.5e-07	++ + + ++++++++
chr17:35258360-35259421	676	ataaataaaCAtgtgtgtgtgtgtgtgtgtgtgtgtgtgtgtATAAAACCATATCCAAAAATTTATCAGTATGTG TGTTTGCTTaactcagatcctctggaagagcagtcagtgcccttaaacgcttagccatctcgccagccccCgagt	688	3	y	7.7e-10	+++++++++++++++
chr17:35258360-35259421	676	ataaataaaCAtgtgtgtgtgtgtgtgtgtgtgtgtgtgtgtATAAAACCATATCCAAAAATTTATCAGTATGTG TGTTTGCTTaactcagatcctctggaagagcagtcagtgcccttaaacgcttagccatctcgccagccccCgagt	704	3	y	1.1e-08	++++++++++++++
chr17:35258360-35259421	676	ataaataaaCAtgtgtgtgtgtgtgtgtgtgtgtgtgtgtgtATAAAACCATATCCAAAAATTTATCAGTATGTG TGTTTGCTTaactcagatcctctggaagagcagtcagtgcccttaaacgcttagccatctcgccagccccCgagt	746	3	y	2.7e-05	+++++++ ++ +
chr7:80778497-80779695	151	agagctAGGAGGGAAGTAGTTAGTTAGCTATATATCCGTGTGTGTGTTGGGGGGGGGTAATAAGTCAGTTAGCTA	182	3	y	8.5e-06	+ + +++++++++
chr7:80778497-80779695	226	TATATGTGTGTGTGTGTGGTAATAAGTTAGTTAGCTATATATCCAtgtggtgtgtgtttgtgtttgtgtgtgtgt gtgtgtgtgtgtgtgtgtgtgtgtgtgtgGTAATAAATTagtggtggcgcacgcctttaatcccagcatttggga ggcagaggcaggcagatttctgagttcgaggccagcctggtctacagagtgagttccaggacagccagggctaca	229	3	y	4.9e-09	++++++++++++++
chr7:80778497-80779695	226	TATATGTGTGTGTGTGTGGTAATAAGTTAGTTAGCTATATATCCAtgtggtgtgtgtttgtgtttgtgtgtgtgt gtgtgtgtgtgtgtgtgtgtgtgtgtgtgGTAATAAATTagtggtggcgcacgcctttaatcccagcatttggga ggcagaggcaggcagatttctgagttcgaggccagcctggtctacagagtgagttccaggacagccagggctaca	291	3	y	7.7e-10	+++++++++++++++
chr7:80778497-80779695	226	TATATGTGTGTGTGTGTGGTAATAAGTTAGTTAGCTATATATCCAtgtggtgtgtgtttgtgtttgtgtgtgtgt gtgtgtgtgtgtgtgtgtgtgtgtgtgtgGTAATAAATTagtggtggcgcacgcctttaatcccagcatttggga ggcagaggcaggcagatttctgagttcgaggccagcctggtctacagagtgagttccaggacagccagggctaca	307	3	y	7.7e-10	+++++++++++++++
chr7:80778497-80779695	226	TATATGTGTGTGTGTGTGGTAATAAGTTAGTTAGCTATATATCCAtgtggtgtgtgtttgtgtttgtgtgtgtgt gtgtgtgtgtgtgtgtgtgtgtgtgtgtgGTAATAAATTagtggtggcgcacgcctttaatcccagcatttggga ggcagaggcaggcagatttctgagttcgaggccagcctggtctacagagtgagttccaggacagccagggctaca	373	2	y	4.3e-10	+++++++++++++++
chr7:80778497-80779695	451	cagagaaaccctgtctctaaaaacaaaaACAAAACAAAACAAAAAAAAGTAAGTTAGCTATATATCTGTGTGGGG TGTGTGTGTGTGTGTTAATAAGTAAGTTAGCTATATATTCGTGTGTGGGATGTGCGTGTGAGGGGGGGGAGGGga gagagagagagagagagagagagagagagagagagagagagagagagaATGTAAGACTGCTCAATTCCCAGAAAT	469	1	n	2e-07	+++++ +++++ +++
chr7:80778497-80779695	451	cagagaaaccctgtctctaaaaacaaaaACAAAACAAAACAAAAAAAAGTAAGTTAGCTATATATCTGTGTGGGG TGTGTGTGTGTGTGTTAATAAGTAAGTTAGCTATATATTCGTGTGTGGGATGTGCGTGTGAGGGGGGGGAGGGga gagagagagagagagagagagagagagagagagagagagagagagagaATGTAAGACTGCTCAATTCCCAGAAAT	487	1	n	1.3e-05	++++++++++++ +
chr7:80778497-80779695	451	cagagaaaccctgtctctaaaaacaaaaACAAAACAAAACAAAAAAAAGTAAGTTAGCTATATATCTGTGTGGGG TGTGTGTGTGTGTGTTAATAAGTAAGTTAGCTATATATTCGTGTGTGGGATGTGCGTGTGAGGGGGGGGAGGGga gagagagagagagagagagagagagagagagagagagagagagagagaATGTAAGACTGCTCAATTCCCAGAAAT	508	3	y	3.2e-05	+ + + + ++++++
chr7:80778497-80779695	451	cagagaaaccctgtctctaaaaacaaaaACAAAACAAAACAAAAAAAAGTAAGTTAGCTATATATCTGTGTGGGG TGTGTGTGTGTGTGTTAATAAGTAAGTTAGCTATATATTCGTGTGTGGGATGTGCGTGTGAGGGGGGGGAGGGga gagagagagagagagagagagagagagagagagagagagagagagagaATGTAAGACTGCTCAATTCCCAGAAAT	525	3	y	7.7e-10	+++++++++++++++
chr7:80778497-80779695	451	cagagaaaccctgtctctaaaaacaaaaACAAAACAAAACAAAAAAAAGTAAGTTAGCTATATATCTGTGTGGGG TGTGTGTGTGTGTGTTAATAAGTAAGTTAGCTATATATTCGTGTGTGGGATGTGCGTGTGAGGGGGGGGAGGGga gagagagagagagagagagagagagagagagagagagagagagagagaATGTAAGACTGCTCAATTCCCAGAAAT	558	3	y	2.2e-05	+ + + +++++++
chr7:80778497-80779695	451	cagagaaaccctgtctctaaaaacaaaaACAAAACAAAACAAAAAAAAGTAAGTTAGCTATATATCTGTGTGGGG TGTGTGTGTGTGTGTTAATAAGTAAGTTAGCTATATATTCGTGTGTGGGATGTGCGTGTGAGGGGGGGGAGGGga gagagagagagagagagagagagagagagagagagagagagagagagaATGTAAGACTGCTCAATTCCCAGAAAT	598	2	y	6.2e-06	++++ ++++ ++
chr7:80778497-80779695	451	cagagaaaccctgtctctaaaaacaaaaACAAAACAAAACAAAAAAAAGTAAGTTAGCTATATATCTGTGTGGGG TGTGTGTGTGTGTGTTAATAAGTAAGTTAGCTATATATTCGTGTGTGGGATGTGCGTGTGAGGGGGGGGAGGGga gagagagagagagagagagagagagagagagagagagagagagagagaATGTAAGACTGCTCAATTCCCAGAAAT	614	2	y	1.9e-05	+++ ++++ ++
chr7:80778497-80779695	451	cagagaaaccctgtctctaaaaacaaaaACAAAACAAAACAAAAAAAAGTAAGTTAGCTATATATCTGTGTGGGG TGTGTGTGTGTGTGTTAATAAGTAAGTTAGCTATATATTCGTGTGTGGGATGTGCGTGTGAGGGGGGGGAGGGga gagagagagagagagagagagagagagagagagagagagagagagagaATGTAAGACTGCTCAATTCCCAGAAAT	630	2	y	1.9e-05	+++ ++++ ++
chr7:80778497-80779695	1126	TGGGGATTCCATTAAACCACCCTTACACGCAACCCCTGGGTGTGCAAGCGGCCTGAGGAAATCGACAGTGTGT	1143	3	n	6.9e-05	+++ + ++++ ++
chr17:3083181-3084407	76	cttgggaggcagaagcaggcagatttctgagttaaaggccagcctggtctacagagtgagtgccaggacagccag	80	2	y	5.9e-09	+++++++++ +++++
chr17:3083181-3084407	151	ggctatacagaaaaaccctgtctcggaaaaaaagaaAAacaaacaaacacacacacacacacacacaAAAAGGGG	179	1	n	3.7e-07	+++++ +++++ +++
chr17:3083181-3084407	151	ggctatacagaaaaaccctgtctcggaaaaaaagaaAAacaaacaaacacacacacacacacacacaAAAAGGGG	198	3	n	7.7e-10	+++++++++++++++
chr17:3083181-3084407	301	AAGTCTGGGAAAAAACAAAATTAAATTCaataaagaaataaatagataaataaataaataaaATTTAAACATTCa	311	1	n	5.8e-06	+++++ ++++ +++
chr17:3083181-3084407	301	AAGTCTGGGAAAAAACAAAATTAAATTCaataaagaaataaatagataaataaataaataaaATTTAAACATTCa	348	1	n	7.9e-07	+++ +++ +++ +++
chr17:3083181-3084407	376	aaaattaaaattaaaaaataattagaaaaaataCCGTCTTGAAAAAAACCaaaaaaaaaaaaaataaattttGGA	382	1	n	2.9e-05	++++ ++++++ ++
chr17:3083181-3084407	376	aaaattaaaattaaaaaataattagaaaaaataCCGTCTTGAAAAAAACCaaaaaaaaaaaaaataaattttGGA	429	1	n	2.4e-08	+++++++++++ +++
chr17:3083181-3084407	526	AGTCTGGGAAAAACCAAAACTAACTTCAATAAAAAATGAatagatagatagatggatagatagatagatagatga	534	1	n	3.5e-05	+++++ ++++ ++
chr17:3083181-3084407	601	ataTTAAACATTCaaaatttattaaaaataaaaataattagaaaaaataaCAACCCAGTCTCGGAAAAAAAGAAC AAAAAAGAAAAAAATGGGGGGCGGGGCTCAGAGGAACCAAAGCCAGGACAGAACTACAACTCCCAGCATGCCTCG GGGCTGAGGCAGGGGCATGCCGGAGCCTACACTGACCTGAGATGGCCGGAGAGAGTCTTCCTGTCCACGACCAGT	623	1	n	3.7e-05	+++++ +++++ ++
chr17:3083181-3084407	601	ataTTAAACATTCaaaatttattaaaaataaaaataattagaaaaaataaCAACCCAGTCTCGGAAAAAAAGAAC AAAAAAGAAAAAAATGGGGGGCGGGGCTCAGAGGAACCAAAGCCAGGACAGAACTACAACTCCCAGCATGCCTCG GGGCTGAGGCAGGGGCATGCCGGAGCCTACACTGACCTGAGATGGCCGGAGAGAGTCTTCCTGTCCACGACCAGT	665	1	n	2.8e-06	+++++++ ++ ++++
chr17:3083181-3084407	601	ataTTAAACATTCaaaatttattaaaaataaaaataattagaaaaaataaCAACCCAGTCTCGGAAAAAAAGAAC AAAAAAGAAAAAAATGGGGGGCGGGGCTCAGAGGAACCAAAGCCAGGACAGAACTACAACTCCCAGCATGCCTCG GGGCTGAGGCAGGGGCATGCCGGAGCCTACACTGACCTGAGATGGCCGGAGAGAGTCTTCCTGTCCACGACCAGT	708	2	y	4.6e-05	+++ ++ ++ ++++
chr17:3083181-3084407	601	ataTTAAACATTCaaaatttattaaaaataaaaataattagaaaaaataaCAACCCAGTCTCGGAAAAAAAGAAC AAAAAAGAAAAAAATGGGGGGCGGGGCTCAGAGGAACCAAAGCCAGGACAGAACTACAACTCCCAGCATGCCTCG GGGCTGAGGCAGGGGCATGCCGGAGCCTACACTGACCTGAGATGGCCGGAGAGAGTCTTCCTGTCCACGACCAGT	749	2	y	2.2e-06	+ +++ ++++++++
chr10:80141361-80142517	226	CGACCTCTCCCCAGCACGCACCGCAGCGGGCATCATGAAATTTAAttatttatttagcagcttctcatgatgtag	266	1	y	1e-05	+++ ++ +++ +++
chr10:80141361-80142517	376	ATGCATATATATATAtgtgtgtgtgtgtgtgtgtgtgtgtgtgtgtgtgtgtgtgtttcgagataggatttttct	392	3	y	7.7e-10	+++++++++++++++
chr10:80141361-80142517	376	ATGCATATATATATAtgtgtgtgtgtgtgtgtgtgtgtgtgtgtgtgtgtgtgtgtttcgagataggatttttct	408	3	y	7.7e-10	+++++++++++++++
chr10:80141361-80142517	451	gtataatcctggctgttggctgtcctggaactcactctgtagaccaggctggtctcaaactcagaaagccgcctg cctctgcctcccaagtgctgggaataaaggcacgcgccaccactgcccATCTATATTTGATGCACTTTTGGAAAT	522	2	n	4.3e-10	+++++++++++++++
chr10:80141361-80142517	976	TGCGTTCTTGTGGGAACTGCGCCTCCCAGAAGGCACCGCGCGTCGTCCTTCTCCCTCCCTGAAGGCCGCCTCGCT	1019	2	n	3.1e-05	+ + + +++ +++++
chr11:70680052-70680316	151	CTCtgtgtgtgtgtgtgtgtgtgtgtgtgtgtgtgtgtgtgtgtgtgtatgtttgtgtgtgtgtgCCCACGCGTG	155	3	y	7.7e-10	+++++++++++++++
chr11:70680052-70680316	151	CTCtgtgtgtgtgtgtgtgtgtgtgtgtgtgtgtgtgtgtgtgtgtgtatgtttgtgtgtgtgtgCCCACGCGTG	171	3	y	7.7e-10	+++++++++++++++
chr11:70680052-70680316	151	CTCtgtgtgtgtgtgtgtgtgtgtgtgtgtgtgtgtgtgtgtgtgtgtatgtttgtgtgtgtgtgCCCACGCGTG	187	3	y	5.8e-09	++++++++++++ ++
chr11:70680052-70680316	151	CTCtgtgtgtgtgtgtgtgtgtgtgtgtgtgtgtgtgtgtgtgtgtgtatgtttgtgtgtgtgtgCCCACGCGTG	207	3	y	4.2e-05	+++++++++ +
chr11:70680052-70680316	226	TATGTACAATTTTTTTTTTTTTTTTGTCTAGGATTAAAG	235	1	y	3.7e-09	+++++++++++++++
chr6:134928512-134928936	1	gtgcatgtgcgtgcgtacgtgtgtttgcgtgtgcgcgtgtgtgatgtgtgCATATAAAGCGAGAAGTTGAAGTTT	29	3	y	3.6e-08	+++++ + +++++++
chr6:134928512-134928936	226	GCGCTTAACTGAGTTTTGGAAGAAAAAAAAAAAAAGCCTAAACCGTGCGCCTGCTGCGTTTTACGAATCCTTCGG	245	1	n	1.6e-06	++ ++++++++++++
chr6:134928512-134928936	301	TCCACAGGTCCGCGGGTCCCCGCCCAGCCCGCCGCGCTTCCCCCGCCCACCTTCCCCTGCTTCCCCATTGGCTCG	350	2	n	1.2e-06	+++ ++ ++++ +++
chr6:134928512-134928936	376	CGCCTGCAGTTTGaatttttttttttttttttttGGATGCTTGTTTTCT	391	1	y	3.7e-09	+++++++++++++++
chr7:97747218-97748902	76	TATATCAGCATTCATGGGAGGTGTGAGGGCCCTGTGGAAAGCAGAGGAAGGTCAAAGGTGAAGCAAGAGGCAGAA	112	2	y	8.5e-07	+ + +++++++ +++
chr7:97747218-97748902	76	TATATCAGCATTCATGGGAGGTGTGAGGGCCCTGTGGAAAGCAGAGGAAGGTCAAAGGTGAAGCAAGAGGCAGAA	135	2	y	2.1e-05	+ ++ ++++++++
chr7:97747218-97748902	451	ttctggcctccaagggcaccaggcacacatctgatacacaagacatatatgcaggcaaatacccatacacataaa aacataatgaaCATAATGAAATAATAGTTTTAGGAGTTAAAAACAAAACAAAATAAAAGCGTGCGTGTacacaca cacacacacacacacacacacacacacacacgcacacgcgcacGCCTTCCAGGATCTCTTTACTGACTCCAGTTC	516	3	n	3.5e-05	+++++ + + +++
chr7:97747218-97748902	451	ttctggcctccaagggcaccaggcacacatctgatacacaagacatatatgcaggcaaatacccatacacataaa aacataatgaaCATAATGAAATAATAGTTTTAGGAGTTAAAAACAAAACAAAATAAAAGCGTGCGTGTacacaca cacacacacacacacacacacacacacacacgcacacgcgcacGCCTTCCAGGATCTCTTTACTGACTCCAGTTC	564	1	n	7.9e-07	+++++ ++++ ++++
chr7:97747218-97748902	451	ttctggcctccaagggcaccaggcacacatctgatacacaagacatatatgcaggcaaatacccatacacataaa aacataatgaaCATAATGAAATAATAGTTTTAGGAGTTAAAAACAAAACAAAATAAAAGCGTGCGTGTacacaca cacacacacacacacacacacacacacacacgcacacgcgcacGCCTTCCAGGATCTCTTTACTGACTCCAGTTC	595	3	n	7.7e-10	+++++++++++++++
chr7:97747218-97748902	451	ttctggcctccaagggcaccaggcacacatctgatacacaagacatatatgcaggcaaatacccatacacataaa aacataatgaaCATAATGAAATAATAGTTTTAGGAGTTAAAAACAAAACAAAATAAAAGCGTGCGTGTacacaca cacacacacacacacacacacacacacacacgcacacgcgcacGCCTTCCAGGATCTCTTTACTGACTCCAGTTC	611	3	n	7.7e-10	+++++++++++++++
chr7:97747218-97748902	451	ttctggcctccaagggcaccaggcacacatctgatacacaagacatatatgcaggcaaatacccatacacataaa aacataatgaaCATAATGAAATAATAGTTTTAGGAGTTAAAAACAAAACAAAATAAAAGCGTGCGTGTacacaca cacacacacacacacacacacacacacacacgcacacgcgcacGCCTTCCAGGATCTCTTTACTGACTCCAGTTC	629	3	n	4.1e-07	+++ +++++ + +++
chr7:97747218-97748902	901	aaacaaacaaacaaacaaaaaaacaaaacaaaacaaaacaaacaaacaaaaaaaaaaacGTGAACCGAACTTTTT	909	1	n	1.5e-08	+++++++++++++++
chr7:97747218-97748902	901	aaacaaacaaacaaacaaaaaaacaaaacaaaacaaaacaaacaaacaaaaaaaaaaacGTGAACCGAACTTTTT	944	1	n	6.8e-09	+++++++++++++++
chr7:97747218-97748902	1276	TGGGGAAGGCTGTCACAACttatttatttatttatttatttatttatttatttatttccattttttattaggtat	1298	1	y	7.9e-07	+++ +++ +++ +++
chr7:97747218-97748902	1276	TGGGGAAGGCTGTCACAACttatttatttatttatttatttatttatttatttatttccattttttattaggtat	1314	1	y	7.9e-07	+++ +++ +++ +++
chr7:97747218-97748902	1426	TTTGAGGAGCAGGGATGTTGCTGGTGCGAAGGAAGCCTGGCTGCTGCTCCGGGCTCTTCTGCACAATGCCTCCTC CTTCTGGATCTAGAGCTTGTGCACCCTTGGGGAAGCCAGCCACACTGCATCCCTGCCAAGCTCTGTCTCGGGCCT	1497	2	n	9.4e-05	+++ + ++++ ++
chr7:97747218-97748902	1576	ATGGGTGCAGGGGAAGGCATTTGTGGTTTTTTTGTTATTGTTGTTGTGGGGTGGTGGTGGtttgtttttgttttt gttttgttttgttttgtttCCAACAGAACTCAAA	1578	2	y	2.9e-05	++ ++++ ++ +++
chr7:97747218-97748902	1576	ATGGGTGCAGGGGAAGGCATTTGTGGTTTTTTTGTTATTGTTGTTGTGGGGTGGTGGTGGtttgtttttgttttt gttttgttttgttttgtttCCAACAGAACTCAAA	1603	1	y	4.9e-05	++++++ ++ ++ ++
chr7:97747218-97748902	1576	ATGGGTGCAGGGGAAGGCATTTGTGGTTTTTTTGTTATTGTTGTTGTGGGGTGGTGGTGGtttgtttttgttttt gttttgttttgttttgtttCCAACAGAACTCAAA	1640	1	y	5.1e-08	+++++ +++++++++
chr7:97747218-97748902	1576	ATGGGTGCAGGGGAAGGCATTTGTGGTTTTTTTGTTATTGTTGTTGTGGGGTGGTGGTGGtttgtttttgttttt gttttgttttgttttgtttCCAACAGAACTCAAA	1655	1	y	4.4e-05	+ ++++ ++++++++
chr8:70506393-70506931	1	ACAACCTAGGTCCTCCCAGCCACGCCTCCAGCCGCCTCCCCTCAGGTCCCCCTCAGGCAAGCTCTCCCAGGGCCC GCCCCCTCCTCCAGCCCAGCCCGCTCACTGGTCTAGACGGCGGAAGGCCTGTGCGCGTTCATTCTGAAGCTGCTG	73	2	n	3.1e-05	++ +++ + +++++
chr8:70506393-70506931	376	TGCGCCCCCTGCCGGCCGGGAGGTCCACCACCAGCCCGCGCGCCTTTGAATTCGTTTTTTTTTtttttttttttt	430	1	y	3.7e-09	+++++++++++++++
chr8:70506393-70506931	451	gagacaggttttctgtgtagccctggctgtccctgcctctgcctcccaagtgctgggattaaaggcgtgtgtcac	482	2	n	4.3e-10	+++++++++++++++
chr5:66075075-66075529	301	cctgtccttttactctgcttcctgtatgaggaacacgagcaggcagcttcctgcttctgcctccataaatgcctg	308	2	n	7.3e-05	+ ++++++ +++
chr5:66075075-66075529	301	cctgtccttttactctgcttcctgtatgaggaacacgagcaggcagcttcctgcttctgcctccataaatgcctg	350	2	n	5.9e-09	+++++ +++++++++
chr5:66075075-66075529	376	ttgccatACCTTCTCCACACAGGCACATGCGTGAGCGATCGTGTacacacacacacacacacacacacacacaca TCTC	391	3	n	5.2e-06	++++++ ++++ +
chr5:66075075-66075529	376	ttgccatACCTTCTCCACACAGGCACATGCGTGAGCGATCGTGTacacacacacacacacacacacacacacaca TCTC	421	3	n	7.7e-10	+++++++++++++++
chr5:66075075-66075529	376	ttgccatACCTTCTCCACACAGGCACATGCGTGAGCGATCGTGTacacacacacacacacacacacacacacaca TCTC	437	3	n	4.9e-09	++++++++++++++
chr13:34874309-34875980	226	TCCGCGGAAACTGCGGCTATGGGTCGGGCGGTTCCTTTACCAGGGCCCCGAAGAGGaaaaaaaaaaaaaaaaaaa aaaaaaCCCAAGGAATTGTAATTGTCTGGTCTGTCACTTTGTAAACGTTTCCTGCACGAGTAAGCTAATGTTTCA	282	1	n	3.7e-09	+++++++++++++++
chr13:34874309-34875980	226	TCCGCGGAAACTGCGGCTATGGGTCGGGCGGTTCCTTTACCAGGGCCCCGAAGAGGaaaaaaaaaaaaaaaaaaa aaaaaaCCCAAGGAATTGTAATTGTCTGGTCTGTCACTTTGTAAACGTTTCCTGCACGAGTAAGCTAATGTTTCA	297	1	n	7.3e-07	++++++++++ ++
chr13:34874309-34875980	526	ttattttttatttatttattttttggtttttcgagacagggtttctctgtgtagccctggctgtcctggaactca	540	1	y	4e-07	+++ ++++++ ++++
chr13:34874309-34875980	601	ctctgtagaccaggctggcctcgaactcagatccgcctgcctctacctcccgagtgctgggattaaaggcgtgcg	636	2	n	4.4e-09	+++++++++ +++++
chr13:34874309-34875980	826	GAAACAGAAAACTTAATTCCCATATAAAGCATACCATAAAGAACAGAAGGTCAAAAGGGGACCTGGCAGATATTC	827	1	n	3.9e-05	+++++ ++++ ++
chr13:34874309-34875980	1051	GGTCCCTacacttacacacttacacactcacacttacacacATAACCAGCGCTCTAAGTGAATCAGGCCTTCTTC	1079	3	n	7.7e-07	+++++ +++++++
chr13:34874309-34875980	1201	ATTCTTAGCGCGGACTCCCGAGTGCCGCTTTTCTCTACGTGCTCCGCACATGCGCGGCTGCCTGTCCCTTCTTCC TCCGCTTCCACTGGCGTCCACGGTTCGCCGAGCCGCCGCCAGCATCGCGGAGGAGTCGGGAAGTTCAAGATGGCC	1270	2	n	4.6e-06	++ ++++ ++ +++
chr2:153345521-153345948	226	CAGTGAGGACTACAAATCCCAGCCACCCTTTCGGTTTGTTTTTGTTCAAAAAAAAAAAAAAAAAACCCACACTCC	254	1	y	3.1e-05	+++ +++ +++++
chr2:153345521-153345948	226	CAGTGAGGACTACAAATCCCAGCCACCCTTTCGGTTTGTTTTTGTTCAAAAAAAAAAAAAAAAAACCCACACTCC	273	1	n	3.7e-09	+++++++++++++++
chr2:153345521-153345948	301	CCCTCCTCACTCTTCTCTCTcacacacacgcgggcacacacatacacacacatacccacGGCAGACACGCACGCA TCCGAGCGTCGAAAGGAAAGCCGCGTCTCGCCATCCGGGCCCGCCCGCCACT	337	3	n	1.7e-09	++++++ ++++++++
chr2:153345521-153345948	301	CCCTCCTCACTCTTCTCTCTcacacacacgcgggcacacacatacacacacatacccacGGCAGACACGCACGCA TCCGAGCGTCGAAAGGAAAGCCGCGTCTCGCCATCCGGGCCCGCCCGCCACT	362	3	n	1.8e-05	++ ++++ +++ ++
chr2:93822502-93823881	1	TACCCTGGAGCCAGCGGGGAAGCCTGCGCCGGCCTCCAGTTCCCCACGGCTGACACGGCGCGCACTGCGCATGCG	23	2	n	1.2e-05	+++++ + ++++++
chr2:93822502-93823881	76	AAGCGGTAGCGCCGCGCCCCCTGCTGGACAGGAGGAGTCAGCGCACGTGAGCATTCCCGTTCGGGGCAAAGGCAG AGTGACAGCCAGGCGCACCAAGCTCTGGGATAAAACTGTGGAAAAGGCAAGCATTTGGgtcaggcgtggtggctt	137	2	y	1.9e-05	+ ++++ ++++++
chr2:93822502-93823881	301	aactctgcaaagcatagttaggcccCCagggcaatttggcagtatccatcaaggtgtaaaaaaaaaaaaaaaact	358	1	n	3.7e-09	+++++++++++++++
chr2:93822502-93823881	451	ACCagccgggcgaggtggcgcacgcctttaatcccagcactcgggaggcagaggcaggtggatttctgagttcga	494	2	y	4.3e-10	+++++++++++++++
chr2:93822502-93823881	526	ggccagcctggtctacaaagtgagttccaggacatctcctggctatacagagaaaccctgtctcgaaaaaccaaa aaaaaaaaaaaaaaaaaaagaagaagaaagaaaagaaagaaagaaaCATTCACCGCACTATTTCTAATACTAGCA	598	1	n	3.7e-09	+++++++++++++++
chr2:93822502-93823881	526	ggccagcctggtctacaaagtgagttccaggacatctcctggctatacagagaaaccctgtctcgaaaaaccaaa aaaaaaaaaaaaaaaaaaagaagaagaaagaaaagaaagaaagaaaCATTCACCGCACTATTTCTAATACTAGCA	613	1	n	8e-05	+++++++ ++ ++ +
chr2:93822502-93823881	901	agccgggcaatggtggcgcacgccttttatcccagcacttgggaggcagaggtaggcggatttctgagttcgatg	942	2	y	7.8e-09	+++++++++++ +++
chr2:93822502-93823881	976	ccagcctggtctacagaatgagttccaggacagccagggcgacacataaaaaccctgtctcgaaaaacaaaaCAA AACAAACAAACAAACAAAAATCCAAGACGCAGTTATAAAATTTTGGAAGTAACTGGAGCGGCATGCATAGTGGCA	1050	1	n	4e-08	+++++++++++ +++
chr1:133896041-133896622	76	CGGCAGATAGGAGCTGTGTAAGATCCTGTGAGCCAAGGCCATGACTGTCTCAGGCTCTTTAGGAGGCAACAACTG	119	2	n	3.8e-05	+++ +++ + +++
chr1:133896041-133896622	226	ccagcagtggggaggctgaggcaggaccaggctgggatacatagcaagactctatcctttaaacataattaaaaa aaaaaaaAAACGAAACAGGAAGGTTGGTTATCTCTCTCCTTTCTCCATTCAAGGAAGAAGCTGACTACAAAACAG	236	2	y	8.6e-10	++++++ ++++++++
chr1:133896041-133896622	226	ccagcagtggggaggctgaggcaggaccaggctgggatacatagcaagactctatcctttaaacataattaaaaa aaaaaaaAAACGAAACAGGAAGGTTGGTTATCTCTCTCCTTTCTCCATTCAAGGAAGAAGCTGACTACAAAACAG	296	1	n	3.7e-09	+++++++++++++++
chr1:133896041-133896622	451	CACAAGGCTGCCCTCTGCTGGTTGCACATGCAGGAGGAGCTCAGTGGCCAGAAACCAGGAGTCTGAGGCAGGAGC	508	2	y	2.3e-07	++++ + ++++++++
chr15:8443767-8445676	526	AAGACAAATCGCGGCTTCTTCTTCGTCCTCCTCCTCCTTCTCCCACATAGAAACACTCACACAAACACCCGGCCG	542	2	n	7.3e-05	++ + ++ +++++
chr15:8443767-8445676	526	AAGACAAATCGCGGCTTCTTCTTCGTCCTCCTCCTCCTTCTCCCACATAGAAACACTCACACAAACACCCGGCCG	579	3	n	2.2e-05	+++ ++++++ ++++
chr15:8443767-8445676	676	TGGCGGCTTTGCTGGTGTCGGGTGAGTCGGTACCGACggagggagggagggacgggagggcgggcgggggggaag	717	2	y	7.8e-06	+++++ ++ + + ++
chr15:8443767-8445676	751	gagCCCAgtgtgtgtgtgtgtgtgtgtgtatgtgtgtgtgtgtgtgtgtatgtgtgtgtgtatgtgtgtgtgtgt	758	3	y	7.7e-10	+++++++++++++++
chr15:8443767-8445676	751	gagCCCAgtgtgtgtgtgtgtgtgtgtgtatgtgtgtgtgtgtgtgtgtatgtgtgtgtgtatgtgtgtgtgtgt	782	3	y	7.7e-10	+++++++++++++++
chr15:8443767-8445676	751	gagCCCAgtgtgtgtgtgtgtgtgtgtgtatgtgtgtgtgtgtgtgtgtatgtgtgtgtgtatgtgtgtgtgtgt	804	3	y	1.7e-09	++++++++ ++++++
chr15:8443767-8445676	826	CTCTCTCTCTCGTTCCGTCTCTCCCTCTCAGAACAAAATGCCGACCGGAAGTGCAGCTGCAGGAATGACTCCCTC	839	2	n	1.2e-05	+ + ++++ ++++
chr15:8443767-8445676	976	TCGGGCTCGCAGCTCTGCCTCAGCGCGCCGGCTCCCGCGGGCTCCGGAGGCgcggcggcggcggcgacagcggcg gaggcagcgggagcagcagcggcggTTCTGCTCCGTGCCCTTGTCCTGTGCAACGGACGGCCGTGGATGCTGCCC	1044	2	y	3.3e-05	+ +++ +++++++
chr15:8443767-8445676	1126	GTGGGGTCGCTTCTGCAAGACGGCGTCTACGCCGTTGCTCGGGTGACCGGCTTGATTTTTTTTTTTTTTTTTTCC	1181	1	y	3.7e-09	+++++++++++++++
chr15:8443767-8445676	1576	TTAATTTCTGGAAATACGAGAGGGCTGCTGGACTTGCCTCttttttttttttttttttttttttttttccttttt	1616	1	y	3.7e-09	+++++++++++++++
chr15:8443767-8445676	1576	TTAATTTCTGGAAATACGAGAGGGCTGCTGGACTTGCCTCttttttttttttttttttttttttttttccttttt	1635	1	y	7.2e-06	+++++++++ ++++
chr17:35235781-35236707	1	GGAGGTGGGGAGGGAGGAGGCGCGCCAGGATGCAGGAAATGGCGCAAGCACACGCGCAAGTTTCGGGCGGAAATG	45	3	n	2.4e-05	++ +++++ + ++
chr17:35235781-35236707	151	ATAAGACAATTTGCGACATAGGGTCCTCCTGCAAGCGGAAGATGAGAGGCGAGCTTTCGAAgggaggcagaggca gaggcaggcctggtctatagggcgagctgcagcgacagccaggactacagagagaatccctgtctcgaaacacac	219	2	y	1.9e-09	++++++++++++++
chr17:35235781-35236707	301	acacacaatctcacacacacacacataatcacacacacaccacacaACCACAATGAGGCCAAGTATATGGGTAGA	312	3	n	4.9e-09	++++++++++++++
chr17:35235781-35236707	376	TCAAAAAAGAAAAACACATGGTTAGACACTAACAAGGCAAACGTAGGACAGAGCAGGGAGATGTGTGCAGACGTT	379	1	n	2.4e-05	+++++ +++++ + +
chr17:35235781-35236707	451	CAGATTTGGGGGGAAAGTCTGAAGAGAAGATGGAGGCTGAAAAGAGGGGGTAAGGGCGGAGGGAGGCGTGGAGAC	502	2	y	1.9e-05	+++ ++++ +++
chr17:35235781-35236707	601	CTTTGTGTCTCCTTCGAGACCACCAACCAAGATCTCCTCACACCCAAACACTCTGCCCTCCGCTTCCCCCAGACC	639	3	n	6.3e-05	+++++ ++ ++++ +
chr13:111796641-111797356	76	TTCCTGCTAAGGTCCCACTGCTCAGCAGTGGGTTATGAGCAGCCTCAATGTCTCtgtgtgtgtgtgtgtgtgtgt gtgtgtgtgtACacaggatctctcactatgtccctcaggctagcctggaacactctctccccttcagcctcctga	131	3	y	7.7e-10	+++++++++++++++
chr13:111796641-111797356	76	TTCCTGCTAAGGTCCCACTGCTCAGCAGTGGGTTATGAGCAGCCTCAATGTCTCtgtgtgtgtgtgtgtgtgtgt gtgtgtgtgtACacaggatctctcactatgtccctcaggctagcctggaacactctctccccttcagcctcctga	147	3	y	1.1e-08	++++++++++++++
chr13:111796641-111797356	76	TTCCTGCTAAGGTCCCACTGCTCAGCAGTGGGTTATGAGCAGCCTCAATGTCTCtgtgtgtgtgtgtgtgtgtgt gtgtgtgtgtACacaggatctctcactatgtccctcaggctagcctggaacactctctccccttcagcctcctga	208	2	n	1.7e-05	+ + ++ ++++++
chr13:111796641-111797356	226	gcactgagattacaggtgtatgtggccatgTGTTACCTTCCACTGCTTCTCTTTATAGTACTTTAAGCTTCTCTT	241	3	y	4.9e-05	++++ ++++ ++
chr13:111796641-111797356	301	CACGGGTGATAAACAGTTTGAAACCGCAAGAGTTTATTAAAaaacaaacaaacaaacaaacTTTCAATAAATTTA	342	1	n	4e-08	+++++++++++ +++
chr13:111796641-111797356	376	GCCACAAAAAATAACTTTCAAAATTAAATTTCAGAAAGGAACAAGAATTTGAAGGACGACCTGGGGTCAGGAAAA CAAACACTAAACTTCACAGAGCTGAGAGCGCTGGTCAGCTACAGTGCCTGCAGCGCACCAGGAAGTGGGTCAGGA	447	1	n	4.1e-05	++++ +++ + +++
chr13:111796641-111797356	601	TCAGGGGCTCCCTGCCACTCCTTCCTGGGTCTGTTGCACGTGAGCAGCACAGAGCAGGGGTTTCCAGGACCTCAG	611	2	n	5.7e-05	++++++ ++ + +++
chr5:134313582-134315135	76	CCGCAAGCCCTGGacacacggacacacacacacacacacgctctcatagcgaacccgacacacacacacacacat	98	3	n	7.7e-10	+++++++++++++++
chr5:134313582-134315135	76	CCGCAAGCCCTGGacacacggacacacacacacacacacgctctcatagcgaacccgacacacacacacacacat	134	3	n	7.7e-10	+++++++++++++++
chr5:134313582-134315135	151	acaaacatatacacacacacacaaacgctcacacaGCGAACCCGAGCGCGACCCCACGGGGCTCAGGAGGGGCCG	158	3	n	8.7e-08	+ ++++++++++++
chr5:134313582-134315135	451	GTCCTCCCCCACGCACCACGGGTGTGCGCGTGCAACTGTCGTCTCCCCCCACCACCAGCCGCCCCATCCCCCCAA	470	3	y	7.3e-05	+ +++++ + +++
chr5:134313582-134315135	676	CACTCCCGACGGGGGCAGAGTGTCGAATAAAGACGCCCCTGTTCGCCATGGCACCCCGAGGCAGAGGGGGACGAC	732	2	y	2.4e-05	++++++++++ +
chr5:134313582-134315135	751	GGAGGGGACACTCGAGGGAAAGGGGACGATCTGAGGCGACAGGGACTCACCCGAAGAGCAGCCGGGGAGGGTCGG GGAGGGGGGGATGCGGACAGCAAGCGAGTGTAGGCCGGAGGGGCCTCGGCGAGCTGGCGAACGGGGTGGAGGTGA GAGGGCGAGGGGGGCCCGTGCGTCTCGGCCGTGCTCCTGTCACCGCCGCATGGCCGCCCCCGGCGGGGCCTCGCT	816	2	y	6.5e-05	+++++ ++ +++
chr5:134313582-134315135	751	GGAGGGGACACTCGAGGGAAAGGGGACGATCTGAGGCGACAGGGACTCACCCGAAGAGCAGCCGGGGAGGGTCGG GGAGGGGGGGATGCGGACAGCAAGCGAGTGTAGGCCGGAGGGGCCTCGGCGAGCTGGCGAACGGGGTGGAGGTGA GAGGGCGAGGGGGGCCCGTGCGTCTCGGCCGTGCTCCTGTCACCGCCGCATGGCCGCCCCCGGCGGGGCCTCGCT	900	2	y	3.8e-05	++++ ++++ ++
chr5:134313582-134315135	1051	GCGGCAAGCGCGTGCAGGGAAGCGGGGGGGCCGCCGGTGCCCCCTTTTCTCTGCTCTCCCAGCTTATCTCTCACC CTCCTCCTCCTCCttttttttccccctttttttttttttgcctttttttttttttttttttttttttGTTCCTCG	1124	2	n	3.5e-05	++ ++++ +++++
chr5:134313582-134315135	1051	GCGGCAAGCGCGTGCAGGGAAGCGGGGGGGCCGCCGGTGCCCCCTTTTCTCTGCTCTCCCAGCTTATCTCTCACC CTCCTCCTCCTCCttttttttccccctttttttttttttgcctttttttttttttttttttttttttGTTCCTCG	1168	1	y	3.7e-09	+++++++++++++++
chr5:134313582-134315135	1276	AACGGGTGGGTACCCCGAACTATAACTCCCAGACAGCCTTGCGGCATGAACCCTGATTCTCTCCCCACCGCCCCC	1327	2	n	7.8e-05	++++ +++ + ++
chr10:77970674-77971458	151	AGCCATGGTAAAGATGCACTATTTGCgctgggcgtggtggtgcatacctctaatcccagcactcgggaggcagag gcaggcggatttctgagttcgaggccagcctggtctacagagtgagctccaggacagccagggctatacagagaa	216	2	y	4.3e-10	+++++++++++++++
chr10:77970674-77971458	301	accctgtctccaaaaaccaaaaACCAAAAAAAAAAAAAAACACTGTTTGCAGGGACAGCACTTGTATGAAATGTT	326	1	n	3.7e-09	+++++++++++++++
chr10:77970674-77971458	376	GTTAGGAATAATGCCATaggtggaggtggaggtggaggtggaggtggaggtggaggtggaggtggaggtggaggt	397	2	y	4.1e-05	+++++ ++++ +
chr10:77970674-77971458	376	GTTAGGAATAATGCCATaggtggaggtggaggtggaggtggaggtggaggtggaggtggaggtggaggtggaggt	415	2	y	4.1e-05	+++++ ++++ +
chr10:77970674-77971458	376	GTTAGGAATAATGCCATaggtggaggtggaggtggaggtggaggtggaggtggaggtggaggtggaggtggaggt	433	2	y	4.1e-05	+++++ ++++ +
chr10:77970674-77971458	451	ggaggtggaggtggaggtggaggtggaggtggaggtggagggggCTGTTTCTCCTCCAAAACAGTGAATGGCGAG GCAGGTCACAGGCCAGATAACGTGCATGTGGTCACCGGTGCAGTGACTCTGCTCTATTAAGTTGCATGCTGCACG	451	2	y	4.1e-05	+++++ ++++ +
chr10:77970674-77971458	451	ggaggtggaggtggaggtggaggtggaggtggaggtggagggggCTGTTTCTCCTCCAAAACAGTGAATGGCGAG GCAGGTCACAGGCCAGATAACGTGCATGTGGTCACCGGTGCAGTGACTCTGCTCTATTAAGTTGCATGCTGCACG	469	2	y	4.1e-05	+++++ ++++ +
chr10:77970674-77971458	451	ggaggtggaggtggaggtggaggtggaggtggaggtggagggggCTGTTTCTCCTCCAAAACAGTGAATGGCGAG GCAGGTCACAGGCCAGATAACGTGCATGTGGTCACCGGTGCAGTGACTCTGCTCTATTAAGTTGCATGCTGCACG	516	2	y	1.9e-05	+ + + ++++++++
chr11:69894776-69895693	151	TATAAAGACCAGAAGGGGCAGAAAGGCAGAGTAAAGTGAGCTTCGGAGAGCATGGAGGTTCTGTTATTAAAGGGt tttttttttttttttttttttttttttttactctgtagcccaggttagcctggaacacttaacaaccttcctgcc tcagcctcccaagtgctggggttccatgcctgatttgagagcctggcttGAGTGGTAGAGGCACTAGGTCCCACC	172	2	y	8.3e-05	++++++++ + +
chr11:69894776-69895693	151	TATAAAGACCAGAAGGGGCAGAAAGGCAGAGTAAAGTGAGCTTCGGAGAGCATGGAGGTTCTGTTATTAAAGGGt tttttttttttttttttttttttttttttactctgtagcccaggttagcctggaacacttaacaaccttcctgcc tcagcctcccaagtgctggggttccatgcctgatttgagagcctggcttGAGTGGTAGAGGCACTAGGTCCCACC	225	1	y	3.7e-09	+++++++++++++++
chr11:69894776-69895693	151	TATAAAGACCAGAAGGGGCAGAAAGGCAGAGTAAAGTGAGCTTCGGAGAGCATGGAGGTTCTGTTATTAAAGGGt tttttttttttttttttttttttttttttactctgtagcccaggttagcctggaacacttaacaaccttcctgcc tcagcctcccaagtgctggggttccatgcctgatttgagagcctggcttGAGTGGTAGAGGCACTAGGTCCCACC	240	1	y	3.7e-09	+++++++++++++++
chr11:69894776-69895693	151	TATAAAGACCAGAAGGGGCAGAAAGGCAGAGTAAAGTGAGCTTCGGAGAGCATGGAGGTTCTGTTATTAAAGGGt tttttttttttttttttttttttttttttactctgtagcccaggttagcctggaacacttaacaaccttcctgcc tcagcctcccaagtgctggggttccatgcctgatttgagagcctggcttGAGTGGTAGAGGCACTAGGTCCCACC	295	2	n	8.6e-10	++++++++ ++++++
chr11:69894776-69895693	451	GTTGGGACCTATTGGGCCTTCCTTCCCCTCCTTAGTCTCATGGACCTGCACACACTTACCGGAAGCGGGGTGAGT	467	2	n	1.2e-05	+++ +++ +++++
chr11:69894776-69895693	826	CTCCCCCAGAGACTGCCTGCTGTCACCTTCCATCTGGGACACTGGTCTTTCTCTGCTGCTTTCTCCATTGGTGAA	871	2	n	8.9e-05	++ ++++++ +
chr9:110423077-110424561	151	atggaaagagaaaactactgaaggttgttctctgacctctgcatatgtgcacgcacacacacattcacacaAAAT AAAAAATAAGAATGTTACATTCTTTCCCTAATTTTTAAAAGAGAGGAACTGGGTCTGGGGACAGAAGAGCCCAGG	200	3	n	2.6e-08	+++ ++++++++++
chr9:110423077-110424561	151	atggaaagagaaaactactgaaggttgttctctgacctctgcatatgtgcacgcacacacacattcacacaAAAT AAAAAATAAGAATGTTACATTCTTTCCCTAATTTTTAAAAGAGAGGAACTGGGTCTGGGGACAGAAGAGCCCAGG	222	1	n	2e-05	+++ ++++++ ++ +
chr9:110423077-110424561	376	ACTTTCACTTGGGTATTAAGAAGATCACCTCAATCATCACTATCTGAAGGTCACTGCTtgtgtgtgtgtatgtgt gtgtgtgtgtgtgtgtgtgtgtgtgcgtgtgtgtgtgtgcgtgtgACAGGCAGGGTCATGCTGGTGAGAGGCCAA	447	3	y	7.7e-10	+++++++++++++++
chr9:110423077-110424561	376	ACTTTCACTTGGGTATTAAGAAGATCACCTCAATCATCACTATCTGAAGGTCACTGCTtgtgtgtgtgtatgtgt gtgtgtgtgtgtgtgtgtgtgtgtgcgtgtgtgtgtgtgcgtgtgACAGGCAGGGTCATGCTGGTGAGAGGCCAA	469	3	y	2.3e-09	+++++++ +++++++
chr9:110423077-110424561	526	ACCTACTGTGTCTTGGGACTGGACTCCATCTTAAAAAAACAAACAAAAAGCCTGAGAACTTGACCTGTAGCTAAA	558	1	n	2.1e-08	+++++++++++ +++
chr9:110423077-110424561	976	catgaacacttcctggcacaacactggatagcccaggctgatgttagactcacatcaatccaacttcagcctccc	1035	2	n	8.5e-06	++ + ++ ++++++
chr9:110423077-110424561	1126	GCATCTTGATATGTAGCTGTCCTCCCCTTTTACCTCCTCCAACTCCCTCCTCCCCTACCCCCCCCCCAGCATCCT	1185	2	n	6.9e-05	++ ++ + ++ +++
chr9:110423077-110424561	1351	tcagagcgctctatcctgtccatccctcttctgtgatgcccctgagacttgggtggggcatgtgtgatacagatg	1365	2	n	7.3e-05	++++ + + ++++
chr7:19876567-19877112	1	cagacacagacacagatgcacgcacgcatgcacgcacgcacgcacgcacacgcacatgcagacacacactcaaat	31	3	n	1.9e-07	+++ +++ +++ +++
chr7:19876567-19877112	1	cagacacagacacagatgcacgcacgcatgcacgcacgcacgcacgcacacgcacatgcagacacacactcaaat	55	3	n	2.7e-07	++ ++ ++++++++
chr7:19876567-19877112	76	aaatttttttttttaaATTATAAATTTGgctggctgctggtagcacacgcctttaactcagcaaccaagaggcag aggcaggtggatctctgtgagtttgaggtcagcctggtctacaaagcaaattgcaggacagccagggctacacag	80	1	y	8.2e-06	++++++++++ ++
chr7:19876567-19877112	76	aaatttttttttttaaATTATAAATTTGgctggctgctggtagcacacgcctttaactcagcaaccaagaggcag aggcaggtggatctctgtgagtttgaggtcagcctggtctacaaagcaaattgcaggacagccagggctacacag	143	2	y	1.9e-09	++++++++++++++
chr7:19876567-19877112	226	agagactttgtctcaaaagaagaaCTTTTAAAAAGACATAATTAAGCCCTGGTTTATTCACTCCTTCTGTCTCCT	285	2	n	9.2e-06	++ + ++++ ++++
chr11:69681907-69683085	376	TTGAGGGCTTTGTTTTTaaaaacaaacaaacaaacaaaaaacagctgggcgtggtggcgcacgcctttagtccca	395	1	n	4e-08	+++++++++++ +++
chr11:69681907-69683085	451	gcacttgggaggcagaggcaggcggatttctgagttcgaggccagcctggtctacagagtgagttccaggacagc	458	2	y	4.3e-10	+++++++++++++++
chr11:69681907-69683085	526	caaggctacacagagaaaccctgtctcaaaaaacgaaaaaagaaaaaaaaacaaaaaCTTTAAGCAGGGCGTGAT	568	1	n	3.4e-08	+++++++++ +++++
chr11:69681907-69683085	676	GAGCCTTTCGTTTATTTGTTTGttagtttgtttgagacagggtctcaccattgtaacccctgggtggcctggaac	690	1	y	1e-06	+++ ++++++ ++++
chr11:69681907-69683085	976	GAGGGTACTTGAAGAGTTGGATAAGGTTTTCCCTAGCAGAGACCATAGTCTTTCCTCAACCTGCCGCTAGATGGT	1025	2	n	6.5e-05	+ + ++++ +++ +
chr8:117475100-117476156	1	CGGGGAGGGCGGGGCTTGCAGGCACTTCCCAGTCTCTGCTGCCCCCTGGTGGCCAGATCAGTAACAGTCCAGCAG	29	2	n	1.7e-05	++ + ++++++ ++
chr8:117475100-117476156	151	GAGGGCTCCACCcttcctttcctgctccttcttttttttttttttttgtttttttgttttttgagacggggtttc	182	1	y	3.7e-09	+++++++++++++++
chr8:117475100-117476156	151	GAGGGCTCCACCcttcctttcctgctccttcttttttttttttttttgtttttttgttttttgagacggggtttc	197	1	y	1e-05	+ +++++++ +++++
chr8:117475100-117476156	226	tctgcagtcctggctgtcctggactcactttgtagaccaggctagcctcgaactcagaaatccgcctgcctctgc ctccggagtgctgggattaaaggcgtgcgccaccacgcccggcctgctccttcttttcctGGATACTCTACCCGG	290	2	n	4.3e-10	+++++++++++++++
chr8:117475100-117476156	376	CTCTGCGCTGACTTTAGCAGAGAGAAATTACAGCACGAGACTATAACAAATGGAGGCACGGCACCCCTGCCTTGG TTTCCCCCCCCCCCCCCGACTTGACCACCGTGCCTTTCGGTGTGGTCCTGAGAGTTCTGAGGTGTGTATAGACAC	441	2	n	4.3e-06	+++++++ + +++
chr10:40257675-40259004	601	TGAgtttttgtttttgtttttttttttTGCAAAATAATATACGAACACAGCTTCGAAAGTGCATGTGTATGGTAT	613	1	y	1.3e-08	+++ +++++++++++
chr10:40257675-40259004	601	TGAgtttttgtttttgtttttttttttTGCAAAATAATATACGAACACAGCTTCGAAAGTGCATGTGTATGGTAT	657	3	y	2.3e-05	+++ +++++ ++
chr10:40257675-40259004	676	TCCTTAGGAGAATATTACGGGGTTTTCGCGGGGGGGGGGGGGCGGGTGGGGAATGTCACCATTAGTTAAAAATGT	707	2	y	9.4e-05	++ ++ + +++ ++
chr10:40257675-40259004	826	gttactagagaagtttctctgactgtgtagagcacccgaaaccacgaggaggagacagagtgtcctttcctgagc	870	2	y	8.9e-05	++++ +++ +++
chr10:40257675-40259004	1126	gtcccagacgacctccaactcaagttctgctttctgcctgcctcagcctcctaagtgctggggtttagggtgttc	1162	2	n	8.6e-10	++++++++ ++++++
chr15:6554914-6555801	226	ccaacacaaaatgagcttgatggtattttttgtagacctttttttttgtgtgtgttattttgctttgtttgggct	270	1	y	1.3e-05	+++ + +++ ++ ++
chr15:6554914-6555801	301	tctttAAAAAAAAATGGTGGTCTTCTTGAACATTTGGTTTCTAgtgtgtgtgtgtgtgtgtgtgtgtgtgtgtgt	344	3	y	7.7e-10	+++++++++++++++
chr15:6554914-6555801	301	tctttAAAAAAAAATGGTGGTCTTCTTGAACATTTGGTTTCTAgtgtgtgtgtgtgtgtgtgtgtgtgtgtgtgt	360	3	y	7.7e-10	+++++++++++++++
chr15:6554914-6555801	376	gtgtgtgtgtgtttgtgGGGGGTGGGGTGCGGGGTGTGCATATGTGTGTACACGTATGCTTCTTGGTTTTGCttt atttttaaagagagacaaaaagcaacataaacttggatgagtagggaagatccaggagggactgggggaagggaa	376	3	y	2.2e-08	++++++++++++ ++
chr15:6554914-6555801	376	gtgtgtgtgtgtttgtgGGGGGTGGGGTGCGGGGTGTGCATATGTGTGTACACGTATGCTTCTTGGTTTTGCttt atttttaaagagagacaaaaagcaacataaacttggatgagtagggaagatccaggagggactgggggaagggaa	409	3	y	2.7e-07	+++++ + ++++++
chr15:6554914-6555801	376	gtgtgtgtgtgtttgtgGGGGGTGGGGTGCGGGGTGTGCATATGTGTGTACACGTATGCTTCTTGGTTTTGCttt atttttaaagagagacaaaaagcaacataaacttggatgagtagggaagatccaggagggactgggggaagggaa	442	1	y	3.9e-05	++++ +++ +++++
chr15:6554914-6555801	376	gtgtgtgtgtgtttgtgGGGGGTGGGGTGCGGGGTGTGCATATGTGTGTACACGTATGCTTCTTGGTTTTGCttt atttttaaagagagacaaaaagcaacataaacttggatgagtagggaagatccaggagggactgggggaagggaa	467	1	n	3.3e-05	+++++ ++ + +++
chr15:6554914-6555801	526	aacatactaaggatagatattgtatgaaaaaaAAAACAAAAAAACTTTTTTCAATTAAAAAAGCTGTCAAAGCAA	555	1	n	9.9e-09	+++++++++++++++
chr6:21949336-21950224	1	CCGTCATCCCCCATGTAAGAAATCAACAAATAAACAGAGGCACCGCATTTCGGATTCTGGCGTGCCCGTTTCGCG	20	1	n	1.8e-06	+++ ++++++ +++
chr6:21949336-21950224	226	GGCGGCAGTGAGGCAAGCGCCGTCAGGCGCCAAAGTGGAGCCtttttttttttcctttgcttttttttttttttt	286	1	y	3.7e-09	+++++++++++++++
chr6:21949336-21950224	526	ggcgggatggcgggagggagggggagcgggGGATGTTTCTTTCTCACGGTAACTGGCAGCCTCGTTGTGAGCCGC	538	2	y	2.1e-05	+++++ ++ ++ ++
chr6:21949336-21950224	601	CCCCCCTCCcgtacgcacgcacgcacgcacgcacacacgcGTGACGCCAGCGCGTCCCTTCGCCGTTGGCCCCGC	624	3	n	1.8e-08	+++ +++ +++++++
chr6:21949336-21950224	751	CGAGATGGATCTGCAGGTGCAGAGTAAGTGGCGCGTCTCCACGGCCCCGCGCAGCCCCGGCCTCCCTCGGGCATC	801	2	n	7.3e-05	+ +++ + ++++++
chr15:75085541-75087081	1	aggctggccacaaactcagaaatcctcccatccctgcctccctagggctgggattaaaggcttgagccaccactc	27	2	n	8.5e-06	++ + ++++++++
chr15:75085541-75087081	76	tcaggtattttttaattttttaatttttaaattgtatttatttaattCATttttgtttttttttcaagatgcggt	86	1	y	2.1e-05	+++ ++++++ ++
chr15:75085541-75087081	76	tcaggtattttttaattttttaatttttaaattgtatttatttaattCATttttgtttttttttcaagatgcggt	125	1	y	3.4e-08	+++++ +++++++++
chr15:75085541-75087081	151	ttctctgtgtaacactggctgtcctggaactcactctgtaggccaggctggcctttgaaccctaatctgtttgtt tctgtttcccaagtgctgggattaaatgcatgtgccaccactgcccggACTAATTTTATTTGTTTGAAAATACct	220	2	n	3.3e-05	++ ++++ +++
chr15:75085541-75087081	151	ttctctgtgtaacactggctgtcctggaactcactctgtaggccaggctggcctttgaaccctaatctgtttgtt tctgtttcccaagtgctgggattaaatgcatgtgccaccactgcccggACTAATTTTATTTGTTTGAAAATACct	276	1	y	5.5e-05	+ ++++ +++++++
chr15:75085541-75087081	376	tttcttcctttctttctttgtctttctgactttctgtctttctgtctttctattttttttttttcgtttttttct	430	1	y	8.7e-07	++++++++++ ++++
chr15:75085541-75087081	526	aggtgtgttccacaagtgcccCAGCTCTACTCTAATTCTCTTTTAAAAAatgtgtgtgtgtatgtatgtatatat	579	3	y	2.2e-08	++++++++ +++ ++
chr15:75085541-75087081	601	gtatatatAGTAGTAATATTAATCCATTAATATCTCTTTTTCCTAAAATTCATGtctgtctgtctctgtctcttt	659	2	n	5.1e-07	+++ +++++ +++
chr15:75085541-75087081	676	ctctctctctctttccttctTTATTAAAtttattcttttcatacatagtttcttagtgtaagcatccctgactgt	677	2	n	2.5e-05	++ ++++ +++
chr15:75085541-75087081	751	cttgaagacactttgtaggcctcaatcctgtaagagccttcctctgcttttcaaatgctggcatgaatgttgtac	787	2	n	3.1e-06	+++ +++++++ +
chr15:75085541-75087081	826	ctcactatgaccggctGAGATTCTCACCTTTTCTTTTCTCCCCCCCCCCCTTTCTTTTTATGATTCTAGCTTTGG	876	1	y	3.7e-05	+++ +++++ ++ ++
chr15:75085541-75087081	901	CCAGGCAGTGGTGGTGGTTGTggtggcagagggaggtggatcactgtaactttgcagctagcttagtcttcagtc	922	2	y	4.2e-07	++ ++++++++ +++
chr10:115170710-115171763	1	ACCACCTAGCTCAATGAGGAACTGCATCTCCATTTTCTGTAAACAGAAAAAAAAAAAAAAAGGAACCTCACTTGC	47	1	n	3.7e-09	+++++++++++++++
chr10:115170710-115171763	76	TGCATGGCAAATAGGAGAAAACAGTCAAGGCCCATTTGGAACTTGTTAGTATGTGTGCCTCTCCCCCACCTGGCT	118	3	y	9.3e-05	+++ ++ ++++++
chr10:115170710-115171763	151	GTAGCAACTGTGTAAgcacacacacgcacacacaagcacatacatatacacacatacacatgcacacatatatac acatgcacacacatacatatgcatacacatgcacacacatacatatgcatacacatgcacacacacatgcatatg cacacacattcacatgtgcacacacatgcacacatacatgcacacacacatgcacatacaggtacacatacatgc atacatatgcacacacatgcatatggacacacatacacacatgcacacacacacatacatatgcacgcacacata cacacaTGAGTGGGCTATCCTTTATCCATCCTCAAGCTCAGGCAAGCCTTGGCGCACACTAGTAGAAGGAATTGC	169	3	n	2.3e-09	+++++++ +++++++
chr10:115170710-115171763	151	GTAGCAACTGTGTAAgcacacacacgcacacacaagcacatacatatacacacatacacatgcacacatatatac acatgcacacacatacatatgcatacacatgcacacacatacatatgcatacacatgcacacacacatgcatatg cacacacattcacatgtgcacacacatgcacacatacatgcacacacacatgcacatacaggtacacatacatgc atacatatgcacacacatgcatatggacacacatacacacatgcacacacacacatacatatgcacgcacacata cacacaTGAGTGGGCTATCCTTTATCCATCCTCAAGCTCAGGCAAGCCTTGGCGCACACTAGTAGAAGGAATTGC	189	3	n	1.7e-07	++ +++ + ++++++
chr10:115170710-115171763	151	GTAGCAACTGTGTAAgcacacacacgcacacacaagcacatacatatacacacatacacatgcacacatatatac acatgcacacacatacatatgcatacacatgcacacacatacatatgcatacacatgcacacacacatgcatatg cacacacattcacatgtgcacacacatgcacacatacatgcacacacacatgcacatacaggtacacatacatgc atacatatgcacacacatgcatatggacacacatacacacatgcacacacacacatacatatgcacgcacacata cacacaTGAGTGGGCTATCCTTTATCCATCCTCAAGCTCAGGCAAGCCTTGGCGCACACTAGTAGAAGGAATTGC	213	3	n	1.3e-07	++++++ + + ++++
chr10:115170710-115171763	151	GTAGCAACTGTGTAAgcacacacacgcacacacaagcacatacatatacacacatacacatgcacacatatatac acatgcacacacatacatatgcatacacatgcacacacatacatatgcatacacatgcacacacacatgcatatg cacacacattcacatgtgcacacacatgcacacatacatgcacacacacatgcacatacaggtacacatacatgc atacatatgcacacacatgcatatggacacacatacacacatgcacacacacacatacatatgcacgcacacata cacacaTGAGTGGGCTATCCTTTATCCATCCTCAAGCTCAGGCAAGCCTTGGCGCACACTAGTAGAAGGAATTGC	231	3	n	5.6e-07	++++++++ +++ +
chr10:115170710-115171763	151	GTAGCAACTGTGTAAgcacacacacgcacacacaagcacatacatatacacacatacacatgcacacatatatac acatgcacacacatacatatgcatacacatgcacacacatacatatgcatacacatgcacacacacatgcatatg cacacacattcacatgtgcacacacatgcacacatacatgcacacacacatgcacatacaggtacacatacatgc atacatatgcacacacatgcatatggacacacatacacacatgcacacacacacatacatatgcacgcacacata cacacaTGAGTGGGCTATCCTTTATCCATCCTCAAGCTCAGGCAAGCCTTGGCGCACACTAGTAGAAGGAATTGC	249	3	n	1.9e-07	+++++ +++++++
chr10:115170710-115171763	151	GTAGCAACTGTGTAAgcacacacacgcacacacaagcacatacatatacacacatacacatgcacacatatatac acatgcacacacatacatatgcatacacatgcacacacatacatatgcatacacatgcacacacacatgcatatg cacacacattcacatgtgcacacacatgcacacatacatgcacacacacatgcacatacaggtacacatacatgc atacatatgcacacacatgcatatggacacacatacacacatgcacacacacacatacatatgcacgcacacata cacacaTGAGTGGGCTATCCTTTATCCATCCTCAAGCTCAGGCAAGCCTTGGCGCACACTAGTAGAAGGAATTGC	279	3	n	1.4e-07	++ ++++++++++
chr10:115170710-115171763	151	GTAGCAACTGTGTAAgcacacacacgcacacacaagcacatacatatacacacatacacatgcacacatatatac acatgcacacacatacatatgcatacacatgcacacacatacatatgcatacacatgcacacacacatgcatatg cacacacattcacatgtgcacacacatgcacacatacatgcacacacacatgcacatacaggtacacatacatgc atacatatgcacacacatgcatatggacacacatacacacatgcacacacacacatacatatgcacgcacacata cacacaTGAGTGGGCTATCCTTTATCCATCCTCAAGCTCAGGCAAGCCTTGGCGCACACTAGTAGAAGGAATTGC	299	3	n	1.1e-05	++++++++ +++
chr10:115170710-115171763	151	GTAGCAACTGTGTAAgcacacacacgcacacacaagcacatacatatacacacatacacatgcacacatatatac acatgcacacacatacatatgcatacacatgcacacacatacatatgcatacacatgcacacacacatgcatatg cacacacattcacatgtgcacacacatgcacacatacatgcacacacacatgcacatacaggtacacatacatgc atacatatgcacacacatgcatatggacacacatacacacatgcacacacacacatacatatgcacgcacacata cacacaTGAGTGGGCTATCCTTTATCCATCCTCAAGCTCAGGCAAGCCTTGGCGCACACTAGTAGAAGGAATTGC	321	3	n	7.7e-08	++++++ ++++++
chr10:115170710-115171763	151	GTAGCAACTGTGTAAgcacacacacgcacacacaagcacatacatatacacacatacacatgcacacatatatac acatgcacacacatacatatgcatacacatgcacacacatacatatgcatacacatgcacacacacatgcatatg cacacacattcacatgtgcacacacatgcacacatacatgcacacacacatgcacatacaggtacacatacatgc atacatatgcacacacatgcatatggacacacatacacacatgcacacacacacatacatatgcacgcacacata cacacaTGAGTGGGCTATCCTTTATCCATCCTCAAGCTCAGGCAAGCCTTGGCGCACACTAGTAGAAGGAATTGC	341	3	n	4.4e-08	++++++++++ +++
chr10:115170710-115171763	151	GTAGCAACTGTGTAAgcacacacacgcacacacaagcacatacatatacacacatacacatgcacacatatatac acatgcacacacatacatatgcatacacatgcacacacatacatatgcatacacatgcacacacacatgcatatg cacacacattcacatgtgcacacacatgcacacatacatgcacacacacatgcacatacaggtacacatacatgc atacatatgcacacacatgcatatggacacacatacacacatgcacacacacacatacatatgcacgcacacata cacacaTGAGTGGGCTATCCTTTATCCATCCTCAAGCTCAGGCAAGCCTTGGCGCACACTAGTAGAAGGAATTGC	375	3	n	1.1e-06	++ +++ + +++++
chr10:115170710-115171763	151	GTAGCAACTGTGTAAgcacacacacgcacacacaagcacatacatatacacacatacacatgcacacatatatac acatgcacacacatacatatgcatacacatgcacacacatacatatgcatacacatgcacacacacatgcatatg cacacacattcacatgtgcacacacatgcacacatacatgcacacacacatgcacatacaggtacacatacatgc atacatatgcacacacatgcatatggacacacatacacacatgcacacacacacatacatatgcacgcacacata cacacaTGAGTGGGCTATCCTTTATCCATCCTCAAGCTCAGGCAAGCCTTGGCGCACACTAGTAGAAGGAATTGC	411	3	n	1.1e-08	++++++ +++++++
chr10:115170710-115171763	151	GTAGCAACTGTGTAAgcacacacacgcacacacaagcacatacatatacacacatacacatgcacacatatatac acatgcacacacatacatatgcatacacatgcacacacatacatatgcatacacatgcacacacacatgcatatg cacacacattcacatgtgcacacacatgcacacatacatgcacacacacatgcacatacaggtacacatacatgc atacatatgcacacacatgcatatggacacacatacacacatgcacacacacacatacatatgcacgcacacata cacacaTGAGTGGGCTATCCTTTATCCATCCTCAAGCTCAGGCAAGCCTTGGCGCACACTAGTAGAAGGAATTGC	443	3	n	1.8e-08	++++++ +++++++
chr10:115170710-115171763	676	CTTCTCTCACACATTAAAAAGAAAAAAAAAAGCACAGGGGGTGGGGGGGAGTGTAATCTCTTTTTATGAAATCTC	691	1	n	1.6e-07	+++++ +++++++++
chr6:87541280-87542310	226	GCAGTGTGGTGTTTGGAGAACTGCCGTTCCAttctgacaaagggtctcatgtgaccttgaaattcggatcttcct ccttcaccttcccaagtgctgggattgcaggtgtgcagcaccagattcagtttaggtggggctgagtcgtgaacc	298	2	n	1.1e-05	+++ + ++ + +++
chr6:87541280-87542310	451	GATTTTGGCTTGGTTTTAGGTTTTGTTGTTGTTTTTTTTTAAAGATTTTCCCTGGGGGGGGGGGGGAACATAAAT	476	1	y	2e-07	++ ++ +++++++++
chr6:87541280-87542310	526	ATGATacacacacacacacacacacacacacacacacacacatacacacacacacacacacacacacacacatac acacacaTCTATACGTATATATCACATTGTCATATTatcacatgcatgctcagtgagtgtctttggaggccagaa	532	3	n	7.7e-10	+++++++++++++++
chr6:87541280-87542310	526	ATGATacacacacacacacacacacacacacacacacacacatacacacacacacacacacacacacacacatac acacacaTCTATACGTATATATCACATTGTCATATTatcacatgcatgctcagtgagtgtctttggaggccagaa	548	3	n	7.7e-10	+++++++++++++++
chr6:87541280-87542310	526	ATGATacacacacacacacacacacacacacacacacacacatacacacacacacacacacacacacacacatac acacacaTCTATACGTATATATCACATTGTCATATTatcacatgcatgctcagtgagtgtctttggaggccagaa	570	3	n	7.7e-10	+++++++++++++++
chr6:87541280-87542310	526	ATGATacacacacacacacacacacacacacacacacacacatacacacacacacacacacacacacacacatac acacacaTCTATACGTATATATCACATTGTCATATTatcacatgcatgctcagtgagtgtctttggaggccagaa	592	3	n	1.7e-09	++++++ ++++++++
chr6:87541280-87542310	751	tcctctgcaagaacagcgggcactctcagccctgtctccaaccccAAGAACTACGTTATAAAGACAAATCTGGAC	781	2	n	7.3e-05	++++ +++ + ++
chr6:87541280-87542310	901	GCTGATTCCAGAGCTGATATGAAACTCTGAGGTTCGAGTTGAGTAACTGCACACAGGAGAGAGCAGCTGGGGGAG GGGTGGGCAAGAGCAGAGAGCTTGACAGGCTGGCGGGACAGTGCACTGGCTTCAC	962	2	y	9.4e-05	+ ++ + ++ +++
chr7:28953881-28954051	1	GCTAATGTGCTAATCTAATCTacacacacacacacacacacagagagagagacagagagagagagagagagagac agagacagagagacagagagacagacagaggcaaagagaggcagagagaCAGCACCAGTGTCCTGATGCTGCTGA	23	3	n	7.7e-10	+++++++++++++++
chr7:28953881-28954051	1	GCTAATGTGCTAATCTAATCTacacacacacacacacacacagagagagagacagagagagagagagagagagac agagacagagagacagagagacagacagaggcaaagagaggcagagagaCAGCACCAGTGTCCTGATGCTGCTGA	48	2	y	3.1e-06	+++ +++++ ++
chr7:28953881-28954051	1	GCTAATGTGCTAATCTAATCTacacacacacacacacacacagagagagagacagagagagagagagagagagac agagacagagagacagagagacagacagaggcaaagagaggcagagagaCAGCACCAGTGTCCTGATGCTGCTGA	70	2	y	5.1e-07	+++ +++++ +++
chr7:28953881-28954051	1	GCTAATGTGCTAATCTAATCTacacacacacacacacacacagagagagagacagagagagagagagagagagac agagacagagagacagagagacagacagaggcaaagagaggcagagagaCAGCACCAGTGTCCTGATGCTGCTGA	102	2	y	1.3e-06	++++++ ++ +++
chr6:38533515-38535042	76	GACAAAGAATAGGACCAGAGGGAGGCTCGAGGAACTGGTTTCCGCAGCCCGTTTGGCTCTGACGTCTCCCGGGCC	86	2	y	3.5e-05	+ ++++++ +++
chr6:38533515-38535042	151	CACTTTTGCGCAGGCGCAGAGCTACTACGCACAGAAACACGAACACGTAAGCAAAAGCGGGAGCCCGTTCGGCTT	176	3	n	4e-05	++ ++++ + ++++
chr6:38533515-38535042	301	TCACACTGAGGCTGAGTTTGGTTCTCTGTGATAGGGTAAAAACAATAAATTTAAGTGATGACGTACGAAACAGGA	340	1	n	8.4e-05	++++++ +++ ++
chr6:38533515-38535042	451	taagccagggattgtgggttcgagtcccatctggggtGGTTCGTTTTTTTTTTTTATCTATTTTAACATCATCTA	490	1	y	1.8e-07	++ +++++++++++
chr6:38533515-38535042	526	ATTAGATGATTATTGCGAGTCAAACTTACTGTTTAttttatgtatttagagacaaggtctctctacctagttctg	558	1	y	1.7e-05	++ ++++ + + +++
chr6:38533515-38535042	676	cgtgtgccacaacgcccggcCATCTTGTTTTAAAACTAGAGAACTGCGGGGAAAAACAATCaaacaaaaaaaaca aaacgaaaaaaaaaaaagccaggcgtgatggcgcacgcctttaatcccagcactcgggaggcagaggcaggcgga	737	1	n	5.1e-08	++++++++++++ ++
chr6:38533515-38535042	676	cgtgtgccacaacgcccggcCATCTTGTTTTAAAACTAGAGAACTGCGGGGAAAAACAATCaaacaaaaaaaaca aaacgaaaaaaaaaaaagccaggcgtgatggcgcacgcctttaatcccagcactcgggaggcagaggcaggcgga	752	1	n	7.2e-06	++ +++++++++++
chr6:38533515-38535042	676	cgtgtgccacaacgcccggcCATCTTGTTTTAAAACTAGAGAACTGCGGGGAAAAACAATCaaacaaaaaaaaca aaacgaaaaaaaaaaaagccaggcgtgatggcgcacgcctttaatcccagcactcgggaggcagaggcaggcgga	807	2	y	4.3e-10	+++++++++++++++
chr6:38533515-38535042	901	caacaataaacaaacagaaaaacaaaacaaaacTAGAGAACTGGATGTGAGGCTTTACTAGTAAAGGGGCTGCAG	912	1	n	5.2e-07	+++++ +++++ +++
chr19:28011445-28011821	1	TACTTTCCGTCAAAGGAGCCCCGCCTGCCTCTGCCGCCAGCTCTGTGCCCAGCCGCCCCGCAGCCGCGAGAGGAA	24	2	n	2.9e-08	++++++++++++ ++
chr19:28011445-28011821	226	CTGCGCTCCTCCCCTCTCTCTCCTCTCTTCCCCCCGCCCCGCTCAGGttttttttttttttttttttttttCTCC	234	2	n	3.8e-05	+ +++++ ++++
chr19:28011445-28011821	226	CTGCGCTCCTCCCCTCTCTCTCCTCTCTTCCCCCCGCCCCGCTCAGGttttttttttttttttttttttttCTCC	273	1	y	3.7e-09	+++++++++++++++
chr11:87755407-87756811	376	ATCCACTAGCCTTCACTGGGGACAGCTTTTACAATCTTTTAAATCTTCTTGGGTTTtttgttttttgtttgtttg tttgtttTTTGGGGGAagctgggaaccgaacccagggctttgcgcttaccattgagctaaatccccaaccccATC	439	1	y	4e-08	+++ +++++++++++
chr11:87755407-87756811	526	TTTTAAATCTACAGAATTaaaaaaggaaaaattagccgggcggtggtggcgaacacctttaatccctgcactcgg gaggcagagacagatggatttctgagttcgaggccagcttggtctacaaagtgagttctaggacagcttgggcta	540	1	n	6.1e-05	++ ++++++ +++
chr11:87755407-87756811	526	TTTTAAATCTACAGAATTaaaaaaggaaaaattagccgggcggtggtggcgaacacctttaatccctgcactcgg gaggcagagacagatggatttctgagttcgaggccagcttggtctacaaagtgagttctaggacagcttgggcta	600	2	y	1.4e-08	++++++++++ +++
chr11:87755407-87756811	676	tacagagaaaccctgtctcgaaaaaccaaaaaaaaaaaaaaaaaaaaaaaaaaggaaaaaTTGGCTTCTGAGCCC	703	1	n	3.7e-09	+++++++++++++++
chr11:87755407-87756811	676	tacagagaaaccctgtctcgaaaaaccaaaaaaaaaaaaaaaaaaaaaaaaaaggaaaaaTTGGCTTCTGAGCCC	718	1	n	1.9e-06	+++++++++++ ++
chr11:87755407-87756811	901	TGCCAACACACTTGGATTCCAGCTTGAGGAGCAGGAATGAGGGAGTCAGGGGCCTTGTTCCAATGGGGAGACTAG AGACAGAGGCGTGTGGGAGTGGAGGCCTTTGTCTAATGGGAAGGCTGGGGACCGAGGCCTTTATGGGAGGAGGCC	974	2	y	1.9e-05	+++ +++++++ +
chr11:87755407-87756811	1276	CGCCATGTTGAGTCACCACCCACAAGGCCCAGGGCGGGCCCTCTAGGGGGCCACAGGCAGGGTGGAGCGGTCCCT	1322	2	y	1.4e-05	++ + ++ +++++++
chr11:87755407-87756811	1351	GGGAAGTTACACGGAGGGGAGGGGGCAGGGGCCTTTATTAAAGCAGGAGTCGGC	1365	2	y	5.3e-05	+ ++ + ++++++
chrX:152307507-152308284	76	tggaagcagagatggaagggtggggatactcaagccctttgggcccagataattttatcatgacttccagctgct	77	2	y	1.7e-05	+++ ++++++ +
chrX:152307507-152308284	151	tagcatgaaactgcaggagtttgtgtttctatactctttttttttttttttttttttttggtttttcaagacagg	187	1	y	3.7e-09	+++++++++++++++
chrX:152307507-152308284	151	tagcatgaaactgcaggagtttgtgtttctatactctttttttttttttttttttttttggtttttcaagacagg	202	1	y	2.6e-06	++++++++ +++++
chrX:152307507-152308284	226	gtttctctgtgtagccctggctgtcctggaactcactttgtagaccaggctggccttgaactcagaaatctgctt gcctctgcctcccgagtgctgagattaaaggcatgcgccaccacgcccggcttggagtttgtgtttctatacttt ttttttttttttactttggtccaattattccttgctatgccccatgcttttcttttggaacaagaacatttattc	298	2	n	7.8e-09	+ +++++++++++++
chrX:152307507-152308284	226	gtttctctgtgtagccctggctgtcctggaactcactttgtagaccaggctggccttgaactcagaaatctgctt gcctctgcctcccgagtgctgagattaaaggcatgcgccaccacgcccggcttggagtttgtgtttctatacttt ttttttttttttactttggtccaattattccttgctatgccccatgcttttcttttggaacaagaacatttattc	352	1	y	4.1e-05	++ +++ +++++
chrX:152307507-152308284	226	gtttctctgtgtagccctggctgtcctggaactcactttgtagaccaggctggccttgaactcagaaatctgctt gcctctgcctcccgagtgctgagattaaaggcatgcgccaccacgcccggcttggagtttgtgtttctatacttt ttttttttttttactttggtccaattattccttgctatgccccatgcttttcttttggaacaagaacatttattc	373	1	y	3.7e-09	+++++++++++++++
chrX:152307507-152308284	601	acgaactctatagatcaggcagtcctggaactcagagatctagcagcctctgctgccaccacctggcttgacttt	643	2	n	8.3e-05	+ ++++++++ ++
chr8:33897902-33898102	1	AAGGCAGGCCTAACTCCTGCTTCTCCTTTCCACACCAGGCCTCACCAGGTCCTCTCAGAGGTAGCTAGGCAACCA	16	2	n	4.3e-06	+++++ +++ + + +
chr8:33897902-33898102	76	GGACCCATGTGTacacacacacacacacacacacacacacacacacacacacacacacacacacCAGGCCAGACA	89	3	n	7.7e-10	+++++++++++++++
chr8:33897902-33898102	76	GGACCCATGTGTacacacacacacacacacacacacacacacacacacacacacacacacacacCAGGCCAGACA	105	3	n	7.7e-10	+++++++++++++++
chr8:33897902-33898102	76	GGACCCATGTGTacacacacacacacacacacacacacacacacacacacacacacacacacacCAGGCCAGACA	121	3	n	7.7e-10	+++++++++++++++
chr7:127208605-127209424	76	GCCTGCGCGAGGAAAGGCCCTCCCGCACCCCTCCtttttttttttttttttttttttttAATCTCCCGCCCCCTC	110	1	y	3.7e-09	+++++++++++++++
chr7:127208605-127209424	151	TATAAGACCAGGACGGATAATAGGAGAGAGAAAACTGAGTTCCTGCCAATCGATGGAAGGGTGGGTGGGGTTAGA GGCGGGAAGAGGGTGGGTACTCGAGAAAGAGGAAGTGAAGAAGGCAGAGGCAGGACGAAGAAAACAAGCAATAGA AAAGAGAGATCCTGAGCATCCAGGCCAATAAACACAACTGAAGAGAGTGAGTGACCGCAGAAGGGCGGGGAATGA GGCTGGTGTTGGGCAGTAAGAGGCAGGGACTAGGAACTTGTTAGCCAATGGAAATGGTGAAAAGGGAACCAAATT	217	2	y	4.1e-05	++ + ++++++ ++
chr7:127208605-127209424	151	TATAAGACCAGGACGGATAATAGGAGAGAGAAAACTGAGTTCCTGCCAATCGATGGAAGGGTGGGTGGGGTTAGA GGCGGGAAGAGGGTGGGTACTCGAGAAAGAGGAAGTGAAGAAGGCAGAGGCAGGACGAAGAAAACAAGCAATAGA AAAGAGAGATCCTGAGCATCCAGGCCAATAAACACAACTGAAGAGAGTGAGTGACCGCAGAAGGGCGGGGAATGA GGCTGGTGTTGGGCAGTAAGAGGCAGGGACTAGGAACTTGTTAGCCAATGGAAATGGTGAAAAGGGAACCAAATT	265	2	y	4.9e-09	+ +++++++++++++
chr7:127208605-127209424	151	TATAAGACCAGGACGGATAATAGGAGAGAGAAAACTGAGTTCCTGCCAATCGATGGAAGGGTGGGTGGGGTTAGA GGCGGGAAGAGGGTGGGTACTCGAGAAAGAGGAAGTGAAGAAGGCAGAGGCAGGACGAAGAAAACAAGCAATAGA AAAGAGAGATCCTGAGCATCCAGGCCAATAAACACAACTGAAGAGAGTGAGTGACCGCAGAAGGGCGGGGAATGA GGCTGGTGTTGGGCAGTAAGAGGCAGGGACTAGGAACTTGTTAGCCAATGGAAATGGTGAAAAGGGAACCAAATT	287	1	n	7.6e-05	++++++ +++ + ++
chr7:127208605-127209424	151	TATAAGACCAGGACGGATAATAGGAGAGAGAAAACTGAGTTCCTGCCAATCGATGGAAGGGTGGGTGGGGTTAGA GGCGGGAAGAGGGTGGGTACTCGAGAAAGAGGAAGTGAAGAAGGCAGAGGCAGGACGAAGAAAACAAGCAATAGA AAAGAGAGATCCTGAGCATCCAGGCCAATAAACACAACTGAAGAGAGTGAGTGACCGCAGAAGGGCGGGGAATGA GGCTGGTGTTGGGCAGTAAGAGGCAGGGACTAGGAACTTGTTAGCCAATGGAAATGGTGAAAAGGGAACCAAATT	367	2	y	5.3e-05	++ + +++++ ++
chr7:127208605-127209424	151	TATAAGACCAGGACGGATAATAGGAGAGAGAAAACTGAGTTCCTGCCAATCGATGGAAGGGTGGGTGGGGTTAGA GGCGGGAAGAGGGTGGGTACTCGAGAAAGAGGAAGTGAAGAAGGCAGAGGCAGGACGAAGAAAACAAGCAATAGA AAAGAGAGATCCTGAGCATCCAGGCCAATAAACACAACTGAAGAGAGTGAGTGACCGCAGAAGGGCGGGGAATGA GGCTGGTGTTGGGCAGTAAGAGGCAGGGACTAGGAACTTGTTAGCCAATGGAAATGGTGAAAAGGGAACCAAATT	388	2	y	2.5e-05	+ ++ +++++++++
chr11:87426737-87427248	226	ATATATTACTTTCCTTATTTTTTAGTCCCAGTACTTGGAAGATATAGTTTCGTGTACTATGGGAGACACAGGGCT ACACAGACAAACCCTGTCTTGAACTACCCCCAAATGACATTGGTCAACTCAGCTTATTTTGTATTTCTTTttttg ttttttgagacagggtttctctttgtgtagccctgcgtcctggaactcactctgtagaccaggccggcctcgaac	300	3	n	1.7e-05	+++++ +++ ++ +
chr11:87426737-87427248	226	ATATATTACTTTCCTTATTTTTTAGTCCCAGTACTTGGAAGATATAGTTTCGTGTACTATGGGAGACACAGGGCT ACACAGACAAACCCTGTCTTGAACTACCCCCAAATGACATTGGTCAACTCAGCTTATTTTGTATTTCTTTttttg ttttttgagacagggtttctctttgtgtagccctgcgtcctggaactcactctgtagaccaggccggcctcgaac	364	1	y	3.4e-07	+++ +++++++++++
chr11:87426737-87427248	451	tcagaaatccgcctgcccctgcctcccaagtgctgggattaaaggcatgcgccactacgcc	462	2	n	8.5e-09	++++++ ++++++++
chr13:21830228-21832182	151	cgctgggtacgccggctcacggtggtaatcctagcactctgaaggaagaagcaggagggtcaagattctaaggtt	191	2	y	1.7e-06	+ +++ +++ +++++
chr13:21830228-21832182	301	aagggggtctcacaactgcctgtatctctaattccaggagctccagtggctctagtaaccatgggcTTAACCACA	315	2	n	8.9e-05	++++++ + +++
chr13:21830228-21832182	376	TAAAAATAAAAATGCTTAAAACTTCAAGGTGGGTccgggcggtggtggcgctcgcctttaatcccagcacttggg aagcagagacaggcagatttctgattacgaggccagcctggtctacaaagtgagttccaggacagccaggactac	449	2	y	1.7e-08	+++ ++++++ ++++
chr13:21830228-21832182	526	acagagaaaccctgtctcaaaaaaccaaaaAAACTTCAAGGTGAGCATTGGCTACTTATAGATTCCAGGCTAGCT	544	1	n	5.2e-07	++++++ ++++++++
chr13:21830228-21832182	751	CAGACCAAAAAAAAAAAAAAAAAAAttgttttgagacagggtctctttgctcgactgtcctgatactcgcttcat	757	1	n	3.7e-09	+++++++++++++++
chr13:21830228-21832182	826	agacctcaaactcggagatcttcctgctctgcctcccaaatgctgggtttaccaccatgcccagcAAGTAGTAAA	847	2	n	3.3e-05	+ ++++++++++
chr13:21830228-21832182	976	AATCTCTGGGTTCTTTTCTTTATTTTGGCTTAAGACTGGCCTTACCCggcagaggcagaggcgcagagaggcaca	986	1	y	1e-05	++ ++++ +++ +++
chr13:21830228-21832182	976	AATCTCTGGGTTCTTTTCTTTATTTTGGCTTAAGACTGGCCTTACCCggcagaggcagaggcgcagagaggcaca	1026	2	y	2.2e-05	+++++++++++
chr13:21830228-21832182	1051	gaggcagagagagaggcagaggcagaggcaggcggacttctgagtttgaagtcagcctgatctacaaagtgagtt	1068	2	y	1.9e-09	++++++++++++++
chr13:21830228-21832182	1126	ccaggacagccaggactacacagagaaaccctgtctcgaaaaaccaaaaAAAAAAAAAAAAAACCCCACAGACTG	1171	1	n	3.7e-09	+++++++++++++++
chr13:21830228-21832182	1276	CACAGAAAGTTAAGTCTTTTGGAACGTGGTAGTCCTGAAGCAAACCTCTACGTAGGAGGCAGGGGTGGGACGGGG	1330	2	y	2.6e-06	++++++++ ++ ++
chr12:76369481-76370719	151	gcctgcgtgcgtgcgtgcgtgcgcgcgcgcctgcctgcCCGCCCGAGTGGCCAAGGCGGGGGTCGGCCCCGCGCT	157	3	y	1.9e-07	+++ +++ +++ +++
chr12:76369481-76370719	301	TCCCCACACGTCTTGGCGTGACCTGGGAACTTTCCCCGGCGTGTGCaaaaaaaaaaaaaaaaaaaaaacccaaaa aacaaaaaaaaaCCACGGGTGCCCCCTCGGCCCTGGGTGGGGACGGGCAAGGATGCACCGGCGTCTGGCGCGGGA	347	1	n	3.7e-09	+++++++++++++++
chr12:76369481-76370719	301	TCCCCACACGTCTTGGCGTGACCTGGGAACTTTCCCCGGCGTGTGCaaaaaaaaaaaaaaaaaaaaaacccaaaa aacaaaaaaaaaCCACGGGTGCCCCCTCGGCCCTGGGTGGGGACGGGCAAGGATGCACCGGCGTCTGGCGCGGGA	373	1	n	9.1e-08	+++++ +++++++++
chr12:76369481-76370719	901	GCAACCAACAGGCGACCGCGGGTGCCCCTAGCCGCCAGCGGCGGAGTGGGTGGGCGGGCGAGAGGGAGGGGAAGG	961	2	y	6.2e-06	++++ ++ ++ +++
chr13:101694117-101694411	76	TCCCTAATCGCCCATCTGCTCTCCCCAGGCAGCACTCACCCAGGCGCACACACTTCCAGCGCTcacacacacaca cacacacacacacCCCCGCCCGCCCAGCCAAACTAGAGAGGACGCCTTGCAGATAAAGAGCCCGGTGCAGAGAAG	112	3	n	4.9e-06	+++ ++ + +++++
chr13:101694117-101694411	76	TCCCTAATCGCCCATCTGCTCTCCCCAGGCAGCACTCACCCAGGCGCACACACTTCCAGCGCTcacacacacaca cacacacacacacCCCCGCCCGCCCAGCCAAACTAGAGAGGACGCCTTGCAGATAAAGAGCCCGGTGCAGAGAAG	139	3	n	7.7e-10	+++++++++++++++
chr13:101694117-101694411	226	TGCATAAATGAAAGAAAAAAAAAAAAGACTTACTTTGCAGGTTATGCATTTCAACGGTTTCGCTTTGAA	236	1	n	8.7e-07	+++ +++++++++++
chr11:98788943-98789248	76	CTTTAGTTCAGTGGCTAGCGGATGCTAGCTAAGTGGGAGCCGGAGGAAGGAAACACAACAATTGACCACGTGTTA	111	2	y	5.8e-06	++++ + ++++ +++
chr11:98788943-98789248	151	GGGGTGGCTCTCGCAGGGGTTGCTGGGACAGGGAAGGGAGGTCCACGTGGAGTGGGAGGAACACAGTGAAAGTTT	168	2	y	8.9e-05	++ ++ + + ++++
chr11:98788943-98789248	226	TGGCGGGGCGCTCTGAAAAGGGGGGGGGGATAGAAATAATTTTAAAacacacacacacacacacacacacacaca cacac	273	3	n	7.7e-10	+++++++++++++++
chr11:98788943-98789248	226	TGGCGGGGCGCTCTGAAAAGGGGGGGGGGATAGAAATAATTTTAAAacacacacacacacacacacacacacaca cacac	289	3	n	7.7e-10	+++++++++++++++
chr1:153424478-153425291	76	TAATTTGACCCATTGACTTAATCACATCTTcacacacacacacacacacacacacacacacacacacacacacac acacacacacacacacacacaGAGCAATTTGTTTATGATATGAAGGGACGCCTAAACTGAGATCCGCGTGGAAAG	106	3	n	7.7e-10	+++++++++++++++
chr1:153424478-153425291	76	TAATTTGACCCATTGACTTAATCACATCTTcacacacacacacacacacacacacacacacacacacacacacac acacacacacacacacacacaGAGCAATTTGTTTATGATATGAAGGGACGCCTAAACTGAGATCCGCGTGGAAAG	122	3	n	7.7e-10	+++++++++++++++
chr1:153424478-153425291	76	TAATTTGACCCATTGACTTAATCACATCTTcacacacacacacacacacacacacacacacacacacacacacac acacacacacacacacacacaGAGCAATTTGTTTATGATATGAAGGGACGCCTAAACTGAGATCCGCGTGGAAAG	138	3	n	7.7e-10	+++++++++++++++
chr1:153424478-153425291	76	TAATTTGACCCATTGACTTAATCACATCTTcacacacacacacacacacacacacacacacacacacacacacac acacacacacacacacacacaGAGCAATTTGTTTATGATATGAAGGGACGCCTAAACTGAGATCCGCGTGGAAAG	154	3	n	7.7e-10	+++++++++++++++
chr1:153424478-153425291	376	TGAACCGCCCCATTGAgtggggcgggcctgtgaacccagcacttgagagggagaggcaggagaatcagaaattca	421	2	y	3.6e-08	++++ +++++++++
chr1:153424478-153425291	526	TGGGGACCAACGAGCTCCTAGGTTCTGCCATTAGGCGATTCCAAGGATCAATGGGCGGGGTCAGAGGCAGGAccc	582	2	y	6.7e-07	++ + ++++++++++
chr1:153424478-153425291	601	cgcccctatccccgcctctgcgcagcgtgctcccaccgcccccgcacctgccttcatttcccgcccacgcATGTG	605	2	n	1.7e-05	+++ + + +++++
chr1:153424478-153425291	601	cgcccctatccccgcctctgcgcagcgtgctcccaccgcccccgcacctgccttcatttcccgcccacgcATGTG	647	2	n	1.8e-05	+++++++ +++
chr1:86440637-86441753	301	TGAGACTGGACAAAATTAGTTTACACAGGAGGCACGAGAGCGCGCGTACGTGAGACAGAGACAAAAGACAGAGAG	351	2	y	2.1e-05	+++ +++++ ++
chr1:86440637-86441753	451	AAGGTCAGTTTCAAAGATCACAAGTAAATTACCAACTCGCTGGATCCGATGGGGTCGGGTGCACCTGTCTGTTTC TGTGGTACTGGACCATGAACTGACCAGACAGTCTTCCCGAGAGTGGAGTCTGACCGCAAAACAACTGCAGCCTCT	515	3	y	9.3e-05	+++ +++ + ++++
chr1:86440637-86441753	601	TTTTGTTATTTGATTAGTTTGGGGGGGTTGAGTTTGTTTGTTTTGttttgttttttaagacgaggtctcttgcag	601	1	y	5.8e-06	++++ ++ ++++ ++
chr1:86440637-86441753	601	TTTTGTTATTTGATTAGTTTGGGGGGGTTGAGTTTGTTTGTTTTGttttgttttttaagacgaggtctcttgcag	633	1	y	4.4e-07	+++ ++++++++ ++
chr1:86440637-86441753	751	taacgaaccactacCCAGTTGTTTTTTAATTAAATGTTTTGAAGCCCTGAGTTCCTACTTCTATATCCTCTGCCT	804	2	n	4.6e-05	+++ + +++ +++
chr1:86440637-86441753	826	CCCAGGAACCGCCCCCTCCTCCTacacacacacacacacacacacacacacacgcacacaccctcctcctacatg	850	3	n	7.7e-10	+++++++++++++++
chr1:86440637-86441753	826	CCCAGGAACCGCCCCCTCCTCCTacacacacacacacacacacacacacacacgcacacaccctcctcctacatg	872	3	n	2.3e-09	+++++++ +++++++
chr1:86440637-86441753	901	cgcgcgcgcgcacacacacacacacaccctcctcctatacacacacacacacacacacacacacacacacacaca	911	3	n	7.7e-10	+++++++++++++++
chr1:86440637-86441753	901	cgcgcgcgcgcacacacacacacacaccctcctcctatacacacacacacacacacacacacacacacacacaca	940	3	n	7.7e-10	+++++++++++++++
chr1:86440637-86441753	901	cgcgcgcgcgcacacacacacacacaccctcctcctatacacacacacacacacacacacacacacacacacaca	956	3	n	7.7e-10	+++++++++++++++
chr1:86440637-86441753	1051	TTGTGTGACCCTTTCTTCCTTCACCCCCCACCCCGCCCAGCGCCCTCACCCCATAATAGGCAGAGG	1065	2	n	8.9e-05	+ + + ++ ++ ++
chr8:85036706-85037110	151	GCCGCGTTTAAttttttttttttttttttttttttAATTCCCTGCCTCTGGCTCCCTCCTTCCGCGCGAGCCTCT	162	1	y	3.7e-09	+++++++++++++++
chr8:85036706-85037110	151	GCCGCGTTTAAttttttttttttttttttttttttAATTCCCTGCCTCTGGCTCCCTCCTTCCGCGCGAGCCTCT	191	2	n	3.6e-08	++++++++++ ++++
chr8:85036706-85037110	226	GGAGAAGCTGCAGCACTTAGGCGCCGCCGCTGCCTCCCGGGGCCTGGTAGGTGGGCCTCGCTCGGCCGGGGCCCC	248	2	n	8.3e-05	+ +++ ++++++++
chr16:44139005-44140861	151	AATGGTTCCGCGACTTCAGAAAAGCGTTAGtttctttttcttttctttttctttttttttttACAATGACGGGGG	197	1	y	1.6e-07	++++ ++++++++++
chr16:44139005-44140861	376	CTATCACGTGATTTAAAAAAAAAAAAACCCTGTGAGGTTTGCCTGCTGGAGGATCGCCAAGTTATCCGGACCCAT	389	1	n	1.1e-05	+++++++++++++
chr16:44139005-44140861	901	GAGGAGCGGCGGCGGCGGCAGCGCGGCGGCAGATTTCCCCGCGTCTCCCGGAGCCTCAGGGCCTGGCTTGGCTTC TCAGCCAAAAGACCGGCGTGTGGGGTTGAGTGGTCTGAGCTCAGGGCGCGGGCGGAGAGCTCCGGGCGACGAGGA	962	2	n	6.1e-05	++++ ++ ++ ++
chr16:44139005-44140861	1051	CGACGGCGTTGGCGGCGGCTGTAACGACGGCCTCAGCAGACGGGGAAGATGAAAGGGTGAGGAAGGGCAGCTGGC	1102	2	y	1.3e-05	+++ ++++ +++
chr16:44139005-44140861	1201	GGAAGAGACGCGCGCGAAGCCCGGGCGGAGGGTCATGGCCGGGCTTCCCCGGTCCCGCGGCTCCCGGAGGGGGGC GGAGGCTAGGCCGGCTGTTGGCGGGCTGAAGGGCCGACGGAGGCAAGGGCGCGAGTCCACGGTTTCACGTGTGTG	1270	2	y	2.2e-05	++ +++ +++++ +
chr16:44139005-44140861	1201	GGAAGAGACGCGCGCGAAGCCCGGGCGGAGGGTCATGGCCGGGCTTCCCCGGTCCCGCGGCTCCCGGAGGGGGGC GGAGGCTAGGCCGGCTGTTGGCGGGCTGAAGGGCCGACGGAGGCAAGGGCGCGAGTCCACGGTTTCACGTGTGTG	1314	2	y	8.3e-05	+++++++ +++ +
chr16:44139005-44140861	1726	gtgtgtgtgtgtgtgtgtgtgtgtgtgtTGCCCCCCCCCTCCAGTGCAAGGAGGAGAGCTGCTGCTTTTGCTCTT	1726	3	y	7.7e-10	+++++++++++++++
chr11:98942224-98942427	76	CCCCTGGTTTTTGTGGGGAGGGACCTGCCCCTCCCCTCAAGGCCCACAATTGGGAGGGGGGCACTTGGGAGGCCT	99	2	n	8.5e-06	++++++ ++ ++ +
chr11:98942224-98942427	151	GACTAGGGGGCCCTTTCATGCtgtctgtgtgtgtgtgtgtgtgtgtgGTCTCT	177	3	y	7.7e-10	+++++++++++++++
chr10:96333418-96333628	1	TGTAGAGGGCAGATTGAAATCGCAGAGATGCCCCTAGGCActgtagtcatcctggacttggaggctgaggcaaga	60	2	y	3.6e-08	++++++ ++++++ +
chr10:96333418-96333628	151	GGGGACGACGAAACAGAACAAAACAAACAAACAAAATGACTGGAATTGTCAAAAGTCAAT	171	1	n	4e-08	+++++++++++ +++
chr4:134773121-134773349	1	TGATGAGTCCCCTGCCTCTTCCTGCCCTCCTTCTCTGCCCCTCCCTGGAGGCCTCTGAGCACTGGCTGGTGTCAG	11	2	n	8.5e-07	+++++++++ +++ +
chr4:134773121-134773349	1	TGATGAGTCCCCTGCCTCTTCCTGCCCTCCTTCTCTGCCCCTCCCTGGAGGCCTCTGAGCACTGGCTGGTGTCAG	28	2	n	8.9e-05	+ +++++++ +
chr4:134773121-134773349	76	GAGACCAGAGGCTGCCTGCCTCTGCCACCCCCTTACAGAAGAACACTGAGCAAGCAGGTCCTGGCTTGTCTTAAA	90	2	n	5.3e-08	++++++++++++ ++
chr4:134773121-134773349	151	TTGGCTCCAACACCTACCCACACACCACACACACATGCCACATACCACACACCCTGCCCTTGCcacacatgcaca cac	176	3	n	1.1e-05	++++++++++ +
chr4:134773121-134773349	151	TTGGCTCCAACACCTACCCACACACCACACACACATGCCACATACCACACACCCTGCCCTTGCcacacatgcaca cac	214	3	n	1.1e-08	++++++ +++++++
chr12:98746249-98747361	76	GTTGTAACACTAGAGGGTGACACTTGCCAGTCTTGCTACCTGCAGCTGGcagccctcaggaggcaggggcaggtg	134	2	y	8.5e-09	++++++++ ++++++
chr12:98746249-98747361	226	ctcaaaaaacaaaacaaaacaaaacaaaacaTCCCTATAGAATTAAAGTAAGGTCATGGGTTCTGAATATCGTCC CTCTACCTCATCAAGTGTAATAATAGTACATCTTCTAGAAAATAATCTCCTTTTTGTCATTTGATAATATATATC	229	1	n	6.1e-07	++++++ ++++ +++
chr12:98746249-98747361	226	ctcaaaaaacaaaacaaaacaaaacaaaacaTCCCTATAGAATTAAAGTAAGGTCATGGGTTCTGAATATCGTCC CTCTACCTCATCAAGTGTAATAATAGTACATCTTCTAGAAAATAATCTCCTTTTTGTCATTTGATAATATATATC	296	2	n	5.7e-05	+ + +++++ ++++
chr12:98746249-98747361	601	CAGGTTCCGGACCCCGCCCCCCTGCCCGGGACACACACGCGCGCGCGATTGCGCGCATGCGTGTGTGCTCAGACG	632	3	n	3.7e-06	+++++++ + + + +
chr12:98746249-98747361	601	CAGGTTCCGGACCCCGCCCCCCTGCCCGGGACACACACGCGCGCGCGATTGCGCGCATGCGTGTGTGCTCAGACG	653	3	y	2.2e-06	+ + ++ +++++++
chr11:120938151-120939191	376	tttaatcctagcacttgggaggcagaggcaggcagatctctgtgagtttaaggacagcctggtctacagactgag	393	2	y	4.3e-10	+++++++++++++++
chr11:120938151-120939191	451	ttccagggcagccaaagttacacagaaaaaccctgtcatgaaaaacaaaaACAAAACAAAAAAGAAAAAAGGGGG	491	1	n	2e-07	+++++ +++++ +++
chr11:120938151-120939191	526	CTGgggagagggaggggaggggagggaggggagggggagagggaggggaggtggaggagaagagggaggggaggg ggaggaggagaggaggaggaggagaggggaggggaggaggaggaggagagggaggggaaggggaggaggagaggg aggggaaggggaggaggagagggagggggagggggagaAAAGTTTGGAAAGGCAGCACTGGTCTTGTACAGAGGG	557	2	y	2.9e-06	+ ++ +++++ +++
chr11:120938151-120939191	526	CTGgggagagggaggggaggggagggaggggagggggagagggaggggaggtggaggagaagagggaggggaggg ggaggaggagaggaggaggaggagaggggaggggaggaggaggaggagagggaggggaaggggaggaggagaggg aggggaaggggaggaggagagggagggggagggggagaAAAGTTTGGAAAGGCAGCACTGGTCTTGTACAGAGGG	580	2	y	2.2e-05	+ + +++++ +++
chr11:120938151-120939191	526	CTGgggagagggaggggaggggagggaggggagggggagagggaggggaggtggaggagaagagggaggggaggg ggaggaggagaggaggaggaggagaggggaggggaggaggaggaggagagggaggggaaggggaggaggagaggg aggggaaggggaggaggagagggagggggagggggagaAAAGTTTGGAAAGGCAGCACTGGTCTTGTACAGAGGG	595	2	y	6.5e-05	+++++ ++++ +
chr11:120938151-120939191	526	CTGgggagagggaggggaggggagggaggggagggggagagggaggggaggtggaggagaagagggaggggaggg ggaggaggagaggaggaggaggagaggggaggggaggaggaggaggagagggaggggaaggggaggaggagaggg aggggaaggggaggaggagagggagggggagggggagaAAAGTTTGGAAAGGCAGCACTGGTCTTGTACAGAGGG	615	2	y	5.7e-05	+++++ +++ ++
chr11:120938151-120939191	526	CTGgggagagggaggggaggggagggaggggagggggagagggaggggaggtggaggagaagagggaggggaggg ggaggaggagaggaggaggaggagaggggaggggaggaggaggaggagagggaggggaaggggaggaggagaggg aggggaaggggaggaggagagggagggggagggggagaAAAGTTTGGAAAGGCAGCACTGGTCTTGTACAGAGGG	647	2	y	6.2e-06	++++ ++ ++ +++
chr11:120938151-120939191	526	CTGgggagagggaggggaggggagggaggggagggggagagggaggggaggtggaggagaagagggaggggaggg ggaggaggagaggaggaggaggagaggggaggggaggaggaggaggagagggaggggaaggggaggaggagaggg aggggaaggggaggaggagagggagggggagggggagaAAAGTTTGGAAAGGCAGCACTGGTCTTGTACAGAGGG	670	2	y	6.2e-06	++++ ++ ++ +++
chr11:120938151-120939191	526	CTGgggagagggaggggaggggagggaggggagggggagagggaggggaggtggaggagaagagggaggggaggg ggaggaggagaggaggaggaggagaggggaggggaggaggaggaggagagggaggggaaggggaggaggagaggg aggggaaggggaggaggagagggagggggagggggagaAAAGTTTGGAAAGGCAGCACTGGTCTTGTACAGAGGG	693	2	y	3.4e-06	++++ ++ ++ +++
chr7:118740125-118740868	76	GGGGCGgtgtgtgtgtgtgtgtgtgtgtgtgtgtgtgtgtgtgtgtgtgtgtgtgtgtgtgtgaatgggatggct	82	3	y	7.7e-10	+++++++++++++++
chr7:118740125-118740868	76	GGGGCGgtgtgtgtgtgtgtgtgtgtgtgtgtgtgtgtgtgtgtgtgtgtgtgtgtgtgtgtgaatgggatggct	98	3	y	7.7e-10	+++++++++++++++
chr7:118740125-118740868	76	GGGGCGgtgtgtgtgtgtgtgtgtgtgtgtgtgtgtgtgtgtgtgtgtgtgtgtgtgtgtgtgaatgggatggct	114	3	y	7.7e-10	+++++++++++++++
chr7:118740125-118740868	151	cagaaggtaatggcatcgtgtgtgtgtgtgtgtgtgtgtgtgtgtgtgtgAATGGGATGGCTCAGAAGGTAATGG	168	3	y	7.7e-10	+++++++++++++++
chr7:118740125-118740868	151	cagaaggtaatggcatcgtgtgtgtgtgtgtgtgtgtgtgtgtgtgtgtgAATGGGATGGCTCAGAAGGTAATGG	184	3	y	7.7e-10	+++++++++++++++
chr7:118740125-118740868	301	CGAATGGGATTTAagcaaggcgtggtgatgcaggcctttaatcccatcattcggaggcagacgtaaatggatttc	353	2	y	2.9e-05	+++++++++ + +
chr7:118740125-118740868	376	tATTAACAAAATAAAAAGAAAAAATAAAATCAAGGCCGATGACGGAGCTTGGGTTTTGCCGGGCCATTGCCCGAT	389	1	n	2.1e-06	++++ ++++++ +++
chr8:126666513-126666903	1	TAATCCCCGTTTGCTGCCCTGAAGGGAATGGACGGTGGCCAAGGCAGGGAGTTATGGGAAACCATATAAGGGTGC	34	2	y	6.2e-06	++ +++ +++++++
chr8:126666513-126666903	226	AGCTTTTTTTCCCTCCTCCGTCCCTTTGCCAAACATGCAGCGGTTACTATGGCAGTGAGAAGGAAAGTTAAacac acacacacacacacacacacacacacacacacacacacCAAAGTAGAGGCACGCCTTTATCCAGATGTGCAGCCG GGAGCAGAGAGAAAA	298	3	n	7.7e-10	+++++++++++++++
chr8:126666513-126666903	226	AGCTTTTTTTCCCTCCTCCGTCCCTTTGCCAAACATGCAGCGGTTACTATGGCAGTGAGAAGGAAAGTTAAacac acacacacacacacacacacacacacacacacacacacCAAAGTAGAGGCACGCCTTTATCCAGATGTGCAGCCG GGAGCAGAGAGAAAA	314	3	n	7.7e-10	+++++++++++++++
chr8:126666513-126666903	226	AGCTTTTTTTCCCTCCTCCGTCCCTTTGCCAAACATGCAGCGGTTACTATGGCAGTGAGAAGGAAAGTTAAacac acacacacacacacacacacacacacacacacacacacCAAAGTAGAGGCACGCCTTTATCCAGATGTGCAGCCG GGAGCAGAGAGAAAA	375	2	y	4.3e-05	++ ++++++ +
chr12:86800947-86801638	76	CACAAGGAGATCACACACTCACAGATCAGCAACCAAATCCCGGGGAGGCTGTGAGCACGGTAAAGACGTTTGGGC	87	3	n	6.9e-05	+++++++ ++++ +
chr12:86800947-86801638	151	ACCCTATGTGTACAGACAAAATTCAGCCACACAGACACATGTGTGCAGAAGTCCGGGGCCTGGCGTGCAAGCCCA	178	3	n	6.2e-06	++++++ +++++
chr12:86800947-86801638	226	CGGGACTGTGTGTGTGTGTGTGTTTGCGTGCAGTCTACAAACATGTTTTCACAAAGCTCTGGGGAGAAGCGATCA	233	3	y	7.7e-10	+++++++++++++++
chr12:86800947-86801638	376	AGGGCTGGTGGGGGAGGGGCAGCTCCGCCCCTGGCCTGGCCTCCCCCTTCTCCTGGGAAGGTCTCCAGGCCTAGC	405	2	n	3.8e-05	++++ + ++++++
chr12:86800947-86801638	526	CAGACGGCTAGAGGGTTTTCCCTCCTCCTGCTTCCCCCTCCAGTCCCGCCCCACACCCGCCCTTTTATTTTTCCT	552	2	n	1.1e-06	+++++ ++ +++++
chr2:75792504-75792920	1	CAGGGGACAGAGTATGGAGGAGGAGGACACGCATGCGCAGATTTTAAAAGGCTGAGCAGATAGTCAGTATGAAGA	28	3	n	9.8e-05	+++ ++ + ++ +
chr2:75792504-75792920	76	CCTTGCTTTGTGTGGTTTCTGACTTAAGTAAGCCAATGACTGGGAGAAAGGGGAAGTgggggagggatagaggga ggaggggaggagggagaaggaagtgggggagagggaggATGTGAGAGGGAGCGGGGACGACTACTTTGTAACCTG	78	1	y	7.2e-05	++ +++++ ++ ++
chr2:75792504-75792920	76	CCTTGCTTTGTGTGGTTTCTGACTTAAGTAAGCCAATGACTGGGAGAAAGGGGAAGTgggggagggatagaggga ggaggggaggagggagaaggaagtgggggagagggaggATGTGAGAGGGAGCGGGGACGACTACTTTGTAACCTG	138	2	y	9.2e-06	+ + +++++ +++
chr2:75792504-75792920	76	CCTTGCTTTGTGTGGTTTCTGACTTAAGTAAGCCAATGACTGGGAGAAAGGGGAAGTgggggagggatagaggga ggaggggaggagggagaaggaagtgggggagagggaggATGTGAGAGGGAGCGGGGACGACTACTTTGTAACCTG	159	2	y	5.8e-06	+++++ +++ + + +
chr2:75792504-75792920	76	CCTTGCTTTGTGTGGTTTCTGACTTAAGTAAGCCAATGACTGGGAGAAAGGGGAAGTgggggagggatagaggga ggaggggaggagggagaaggaagtgggggagagggaggATGTGAGAGGGAGCGGGGACGACTACTTTGTAACCTG	174	2	y	1.4e-05	+ ++ +++++ +++
chr2:75792504-75792920	226	AAGTAGGGGAGCTAAGGACCCCCCCCCCCCACACACACACACACTATGGCTCATCACAGCCCCAAAGTGACTCTA	255	3	n	7.7e-10	+++++++++++++++
chr10:127135703-127136833	1	GGTGGTGTTTGACGAGGGTGGGAGGAGCCATAGAGGGAACAGAAACAGGCAGAGGGCACTGCAGATACTTTCCAA	35	2	y	9.9e-06	++ ++++ ++++
chr10:127135703-127136833	76	TAAATGGTGCAGAAACCGACTAACAGTCATCAAggcggtggtggcctttaatcccagcactcaggagacagaagg aggaagatctgggtctgaggccagcctgatctacagagtgagtttcaagacagtcaggactacacacctggtcca	139	2	y	4.2e-07	++++ ++++ + +++
chr10:127135703-127136833	226	ggcttacacagagaaaccctaataaaaaatacaaaaTGTCagccgggcagtggtggcacatgcacttatgggagg gcggaggcaggcagatttctgagttccaggccagcctgatctacagagtgagttccagaacagccagggctgtag	246	1	n	6.7e-06	++ ++++++ + +++
chr10:127135703-127136833	226	ggcttacacagagaaaccctaataaaaaatacaaaaTGTCagccgggcagtggtggcacatgcacttatgggagg gcggaggcaggcagatttctgagttccaggccagcctgatctacagagtgagttccagaacagccagggctgtag	297	2	y	1.1e-06	+ +++ ++++++++
chr10:127135703-127136833	376	agagaaaccctgtctcagaaaaaagaaaaGGAAaaaaacaaaaacaaaaacaaaaacaaaaaACCCCACCACCAC	411	1	n	5.1e-08	+++++++++ +++++
chr10:127135703-127136833	376	agagaaaccctgtctcagaaaaaagaaaaGGAAaaaaacaaaaacaaaaacaaaaacaaaaaACCCCACCACCAC	429	1	n	4.9e-05	++++++++++ +
chr10:127135703-127136833	451	CAAAAGAAAAACAAACAAGCGAACAAAGTCATTAAAGAAAAGCCGTTGAATCTTATCCTTCTTtagttttcgtta	459	1	n	5.8e-06	++++++++++ ++
chr10:127135703-127136833	526	tcaacctgacaggcaaaggtcactggtggggctggagacagggctccgtggtaaagggcaccagctactcttcca	553	2	y	5.7e-05	++ + +++ ++++
chr10:127135703-127136833	676	tgtgtgatctacatgtggtacacacacaaacattcataagaaacagtcaaacacatagcacattaaaaaaaaaat caaaaagtcatctgggaagaaatctcaatcgaggggtcgcctatatcaatatagcctgtcggcacaactgtggag	694	3	n	7.2e-07	+++++++++ +++
chr10:127135703-127136833	676	tgtgtgatctacatgtggtacacacacaaacattcataagaaacagtcaaacacatagcacattaaaaaaaaaat caaaaagtcatctgggaagaaatctcaatcgaggggtcgcctatatcaatatagcctgtcggcacaactgtggag	740	1	n	4.4e-07	++++++++++ +++
chr10:127135703-127136833	976	gcaacttccctcagtgaggggctgatacctaaaagtataaaccaaaataaaccacttcctctgtgtccccacaag	1029	2	n	6.5e-05	++ ++++++ +++
chr10:127135703-127136833	1051	tggcttttgctcagggtgtatttatcatggtaacagaaaAAACAAACCTGTGTGAACCGGTTCCTACGAAcacag	1082	1	n	9.4e-06	++ + ++++++ +++
chr2:167775201-167775625	226	TTACTGATCACTTCCTGCACGTCAGGAGGCAGACACGGCTCTGGGGACCCTGTGTCCACAGCGCTTGCGCTTCTG AGGAGGAGGCAGGAGAACAGGAAGTACCTCAAGCACACCACATGCCACATTCTACTTCTGTGAGTGTGCATGAGT GCGCGCGcacgcgcgcacacacacacacacacacaaacacacacacaca	299	2	y	5.8e-06	++++ ++++++++
chr2:167775201-167775625	226	TTACTGATCACTTCCTGCACGTCAGGAGGCAGACACGGCTCTGGGGACCCTGTGTCCACAGCGCTTGCGCTTCTG AGGAGGAGGCAGGAGAACAGGAAGTACCTCAAGCACACCACATGCCACATTCTACTTCTGTGAGTGTGCATGAGT GCGCGCGcacgcgcgcacacacacacacacacacaaacacacacacaca	364	3	y	1.4e-05	+++++ ++ +++ +
chr2:167775201-167775625	226	TTACTGATCACTTCCTGCACGTCAGGAGGCAGACACGGCTCTGGGGACCCTGTGTCCACAGCGCTTGCGCTTCTG AGGAGGAGGCAGGAGAACAGGAAGTACCTCAAGCACACCACATGCCACATTCTACTTCTGTGAGTGTGCATGAGT GCGCGCGcacgcgcgcacacacacacacacacacaaacacacacacaca	391	3	n	7.7e-10	+++++++++++++++
chr2:167775201-167775625	226	TTACTGATCACTTCCTGCACGTCAGGAGGCAGACACGGCTCTGGGGACCCTGTGTCCACAGCGCTTGCGCTTCTG AGGAGGAGGCAGGAGAACAGGAAGTACCTCAAGCACACCACATGCCACATTCTACTTCTGTGAGTGTGCATGAGT GCGCGCGcacgcgcgcacacacacacacacacacaaacacacacacaca	409	3	n	2.2e-08	++ ++++++++++++
chr4:121196401-121197327	76	ACATTAGCTACAGCCaaaaaaaaaaaaaaaaaaaaaaGTGTCTCTAgccagtgtcaggcttcccatttaggcacg	91	1	n	3.7e-09	+++++++++++++++
chr4:121196401-121197327	301	AAGAGACACAGAGAGACTTCCTTGTCATTTCCATCCTCCGCTGATCTATATCCCCGACCTTTACTTCATTTTTTA	302	2	y	6.5e-05	+++ ++ ++ ++
chr4:121196401-121197327	376	AATAAGAAAGCAGAagctgggtgtggtagtgcaaacctttgatcccagcactcagtaggcagaggcaggtggatc	381	2	y	1.1e-05	+ + +++++ ++ ++
chr4:121196401-121197327	376	AATAAGAAAGCAGAagctgggtgtggtagtgcaaacctttgatcccagcactcagtaggcagaggcaggtggatc	430	2	y	2.5e-08	+ +++++++++++++
chr4:121196401-121197327	526	TTGAAGAGCCAAAGGGGGGGGGGGGGACGGACAGATTTTACGCTTTAATCTGAACTAGTCACCTGCCTCCAATAC	530	2	y	8.3e-05	+++ ++ +++ ++
chr4:121196401-121197327	676	CCAAACTCTGCCTTTACTTCCGACTCCACTACCTTTAGTGTCTGCAGCCTCTGCAGTGTGGTCATCATTTGGCCT	682	2	n	2.2e-06	++++++ + + +++
chr13:111940922-111941138	1	GGAGCAAGGAGAATCCTTCTATCAAGGACAGCTAGGGTGTGTGTGTGTGTGTTTTAACCTGATCTTGCCTTGGCT	37	3	y	7.7e-10	+++++++++++++++
chr13:111940922-111941138	151	TAACCATATCATCTATGAAACTGGTGTGTGTGTGTGGGGGGGGGGGAGAGATAAAGGGAAGGACTC	174	3	y	4.7e-07	+++++++++++++ +
chr13:111940922-111941138	151	TAACCATATCATCTATGAAACTGGTGTGTGTGTGTGGGGGGGGGGGAGAGATAAAGGGAAGGACTC	197	2	y	5.3e-05	+++ + +++ + +
chr12:86795937-86796228	151	ATGGCAAGATACAGGTGAAAGGATTTGTGGTGTGGGGAgtgtgtgtgtgtgtgtgtgtgtgtgtgtgtgcgtttg tgtgtgtgtTTTCTCCCACCATCCACTCTCCACTCTCAGGACAGGGACCAAGAAATAGGAAACTTA	189	3	y	7.7e-10	+++++++++++++++
chr12:86795937-86796228	151	ATGGCAAGATACAGGTGAAAGGATTTGTGGTGTGGGGAgtgtgtgtgtgtgtgtgtgtgtgtgtgtgtgcgtttg tgtgtgtgtTTTCTCCCACCATCCACTCTCCACTCTCAGGACAGGGACCAAGAAATAGGAAACTTA	205	3	y	7.7e-10	+++++++++++++++
chr12:86795937-86796228	151	ATGGCAAGATACAGGTGAAAGGATTTGTGGTGTGGGGAgtgtgtgtgtgtgtgtgtgtgtgtgtgtgtgcgtttg tgtgtgtgtTTTCTCCCACCATCCACTCTCCACTCTCAGGACAGGGACCAAGAAATAGGAAACTTA	222	1	y	2.1e-06	+++ + +++ +++++
chr9:65580058-65581322	1	cgccgggcgcccggggcccAAGAAACTTCGGGGGGCGGGGCTGGAGCCGGGGAGGGGCTTCCGGGGGCTGGGGGC GGGGCCAGGGAGGGATACAGCGGCCTCCAAGCCCCCGCCCGCAGCTGGGTGAGGAGCATGGCCGGGTGGGGGGTT	70	2	y	3.3e-05	++ +++ + + ++++
chr9:65580058-65581322	151	CAGGGGCGGGGCCAGGGCGGATCCTGGGCGGGGCCTGTCTTCAGCTCCGGGAATGGACGGAAGAACCTAGGCGGA	152	2	y	8.9e-05	+ +++ + + ++++
chr9:65580058-65581322	151	CAGGGGCGGGGCCAGGGCGGATCCTGGGCGGGGCCTGTCTTCAGCTCCGGGAATGGACGGAAGAACCTAGGCGGA	184	2	n	5.7e-05	++++ ++ ++++
chr9:65580058-65581322	226	GCTGAAGTAGCAGGAAGAGGGCGGAGAGAGGTTTCCCGGACCAAAGCAgggagaaggactgggagggggtagagg ctagggaggtgggggatacggagggggagggggCTTCCGGCCCAGAGGCGGAGGCGAGGGATGCTggcggggtgg ggcagggcgggggcggggcggggcggggcgggggcgCGGCTGACCAAGCAAGCCCGGGAGGCAGTGGGTAGCTGA	242	2	y	1.9e-05	+ +++ +++ +++
chr9:65580058-65581322	226	GCTGAAGTAGCAGGAAGAGGGCGGAGAGAGGTTTCCCGGACCAAAGCAgggagaaggactgggagggggtagagg ctagggaggtgggggatacggagggggagggggCTTCCGGCCCAGAGGCGGAGGCGAGGGATGCTggcggggtgg ggcagggcgggggcggggcggggcggggcgggggcgCGGCTGACCAAGCAAGCCCGGGAGGCAGTGGGTAGCTGA	290	2	y	1.5e-05	++ ++ ++++++ +
chr9:65580058-65581322	226	GCTGAAGTAGCAGGAAGAGGGCGGAGAGAGGTTTCCCGGACCAAAGCAgggagaaggactgggagggggtagagg ctagggaggtgggggatacggagggggagggggCTTCCGGCCCAGAGGCGGAGGCGAGGGATGCTggcggggtgg ggcagggcgggggcggggcggggcggggcgggggcgCGGCTGACCAAGCAAGCCCGGGAGGCAGTGGGTAGCTGA	344	2	y	7.8e-06	+++++ +++++ +
chr9:65580058-65581322	226	GCTGAAGTAGCAGGAAGAGGGCGGAGAGAGGTTTCCCGGACCAAAGCAgggagaaggactgggagggggtagagg ctagggaggtgggggatacggagggggagggggCTTCCGGCCCAGAGGCGGAGGCGAGGGATGCTggcggggtgg ggcagggcgggggcggggcggggcggggcgggggcgCGGCTGACCAAGCAAGCCCGGGAGGCAGTGGGTAGCTGA	367	2	y	6.9e-05	+ ++ + ++++++
chr9:65580058-65581322	826	CTTTTATTTTTATTTTGAAGAAACAGGCTCGGAGAGTGACTGTCACAGCCAAACCTCCAGCATCCCGCGCGCGCG	827	1	y	3.5e-06	++++ +++++ ++++
chr9:65580058-65581322	901	CGcacacacacacacacacacacacacacacacacTATCTTTCCTAGTCAGGTGTGCTGCATGCTACAGCACCCA	903	3	n	7.7e-10	+++++++++++++++
chr9:65580058-65581322	901	CGcacacacacacacacacacacacacacacacacTATCTTTCCTAGTCAGGTGTGCTGCATGCTACAGCACCCA	919	3	n	7.7e-10	+++++++++++++++
chr14:47418221-47418529	1	CTGATTGGAGGGACTTTTGCCAACACTTCCGGAAGCTCCCGCCCCTTCCCCTCGAACGAGGCTTGCGATAGGTTG	38	2	n	7.8e-05	++ +++ ++ ++ +
chr14:47418221-47418529	76	GTTCTGTGCGACATTTAAATTGTTTGGAAGGCAAAGGGTTGGGAGCGGGAGGGCGAGGGGGAGGAGGGAGGCGGT	132	2	y	1.2e-05	++ ++ ++++ +++
chr14:47418221-47418529	226	TTTCTTCTTTCCTTTTAAACGtgtttgtttgtttgtttgtttgtttTGGtttttaagacaaggtctcactatgtc	249	1	y	4e-08	+++ +++++++++++
chr14:47418221-47418529	226	TTTCTTCTTTCCTTTTAAACGtgtttgtttgtttgtttgtttgtttTGGtttttaagacaaggtctcactatgtc	265	1	y	4.7e-06	+++ ++++ +++++
chr15:38601614-38602430	301	TAGTCTTTTttttttttttccgagacagggtttctttgtctagtcctggctgtcctggaactcactttgtagacc	304	1	y	5.2e-07	+ +++++++++++++
chr15:38601614-38602430	376	aggctggcctcaaacccagaaatccacctgcctctgcctcccaagtgctgggattaaaggcatgtgccaccagtg	402	2	n	4.3e-10	+++++++++++++++
chr15:38601614-38602430	526	CTGAGTTACAGTCTGTTTCTACCTGTTGTGCAGCTGAGAAGCACCCGTCTGCCAAATGAAGAAACTGAGAGCCAG	537	2	n	7.8e-05	+++ +++ +++
chr2:4652066-4652356	226	tttaatcccagcacttgggaggcagaggcaggcagatttctgagttGTCTCAAAAAAAAAAAAAA	243	2	y	4.3e-10	+++++++++++++++
chr2:4652066-4652356	226	tttaatcccagcacttgggaggcagaggcaggcagatttctgagttGTCTCAAAAAAAAAAAAAA	276	1	n	2.9e-05	++++++++++++++
chr7:118115851-118116448	226	TAAAGGGATGGCACAGATACCACACGGATGAACACGGAGTTTCACAAACACTCACTCACCGGCGAGGGAAGATGG	246	3	n	3.4e-05	+++++ + ++++
chr7:118115851-118116448	226	TAAAGGGATGGCACAGATACCACACGGATGAACACGGAGTTTCACAAACACTCACTCACCGGCGAGGGAAGATGG	270	3	n	3.4e-05	++ ++++ +++ +++
chr7:118115851-118116448	376	CACTTAAAAAAAAAAAACCCAAAACCCTGTGATTTCTTATAGGACAACCAATGCGAGGGCGGGGCCTCCTCTGGG	383	1	n	7.3e-07	++++++++++ ++
chr7:118115851-118116448	451	AGGGGCAGATGAAACTAGAAATGGTGGGCTGCTAGTCGCTCTGAAACTCGCGGCAGTCCTGCCTCAGCCTCTAGG	508	2	n	1e-08	++++++++ +++++
chr10:80701870-80702816	76	GTGTGGCGCCCGAGTTCGGAGGATCACGGTGTGAAAGGCAGGCGGCACTCCGCGCCCCTGGAGACCAGGACGGGC	103	2	y	9.4e-05	++ + + +++++++
chr10:80701870-80702816	376	TGGGGTGGGTGTGGTGACAGGCTAGAAAGGGGTGGAGCCATCCGTGGGCGGTACCAGGCCTGTAGGCGGAACCAG GCCTGGGACAGGAGTCTAATCGGGGCCTGGCCAGGTAGGGGCGGAGCCATCCGTGGGCAGGCGCTGTCTTTtttt tttttttcgagacagggtttctctgtgtagtcctggctgtcctggaactcactttgtagaccaggttggcctcga	437	2	y	6.1e-05	+ ++++ ++ ++++
chr10:80701870-80702816	376	TGGGGTGGGTGTGGTGACAGGCTAGAAAGGGGTGGAGCCATCCGTGGGCGGTACCAGGCCTGTAGGCGGAACCAG GCCTGGGACAGGAGTCTAATCGGGGCCTGGCCAGGTAGGGGCGGAGCCATCCGTGGGCAGGCGCTGTCTTTtttt tttttttcgagacagggtttctctgtgtagtcctggctgtcctggaactcactttgtagaccaggttggcctcga	517	1	y	5.2e-07	+ +++++++++++++
chr10:80701870-80702816	601	actcagaaattcgcctgcctctgcctcccaagtgctgggattaaaggcttgcgccatcaggcccggTGGGCGGGA	614	2	n	4.3e-10	+++++++++++++++
chr10:80701870-80702816	826	GTGCGGCGCTGGCGGCGCCGATGTTTGGGCAAGGCAGGCTGGGCCAGGCCATGGCCCTGCTGTTGTTTCTGGGCA	859	2	y	3.8e-05	+ ++++ + + ++++
chr9:96399645-96399903	76	ctgtggctccctctctgaggaagtacagttcgctgtagagggaaggtctggtggctctgggtggtggcagaggca tgcagctgTGACTCCTTCATTTCCTGCCTCTTTCTGTGTCTGCCCTTCCCCTTTTCATACAGAAAAACTTTTTTT TTTTTTTTTTTTGAGAACACGATGAGCCATTTT	138	2	y	3.4e-06	++ ++++++++++ +
chr9:96399645-96399903	76	ctgtggctccctctctgaggaagtacagttcgctgtagagggaaggtctggtggctctgggtggtggcagaggca tgcagctgTGACTCCTTCATTTCCTGCCTCTTTCTGTGTCTGCCCTTCCCCTTTTCATACAGAAAAACTTTTTTT TTTTTTTTTTTTGAGAACACGATGAGCCATTTT	173	2	n	1.2e-05	+++++++++ ++
chr9:96399645-96399903	76	ctgtggctccctctctgaggaagtacagttcgctgtagagggaaggtctggtggctctgggtggtggcagaggca tgcagctgTGACTCCTTCATTTCCTGCCTCTTTCTGTGTCTGCCCTTCCCCTTTTCATACAGAAAAACTTTTTTT TTTTTTTTTTTTGAGAACACGATGAGCCATTTT	219	1	y	3.7e-09	+++++++++++++++
chr8:84285877-84286067	1	gggtatcaggcatgcacacagtgcacagacatacacgcaaataaaacattcataTGagtcaggcagtggtggcgc	7	3	n	8.1e-05	++ ++ ++++++
chr8:84285877-84286067	1	gggtatcaggcatgcacacagtgcacagacatacacgcaaataaaacattcataTGagtcaggcagtggtggcgc	24	3	n	3.2e-06	++++ +++ ++++ +
chr8:84285877-84286067	76	acacctttaatcccagcactcgggaggcagaagcaggcagatttctgagttcgaggccagcctggtctacaaagt	98	2	y	5.9e-09	+++++++++ +++++
chr10:80900741-80901210	1	ATGGCTGCTCAGTCAACCGGGCCACGGTCGCGCACACCGACCATACGCCCCGGAAGCCAAGCCGGGGCACCACGG GAAACAGAGGCTGAGTCGATTCCCACAAGGCAGCGCGCGTCGTCAGCAGTCTGACAAAGCTGCGGCCTGAGTCAC	23	3	n	3.5e-05	+++ + + +++++
chr10:80900741-80901210	1	ATGGCTGCTCAGTCAACCGGGCCACGGTCGCGCACACCGACCATACGCCCCGGAAGCCAAGCCGGGGCACCACGG GAAACAGAGGCTGAGTCGATTCCCACAAGGCAGCGCGCGTCGTCAGCAGTCTGACAAAGCTGCGGCCTGAGTCAC	75	2	y	4.3e-06	+++ +++++++ +
chr10:80900741-80901210	376	GCTGGACCAGGGTCATTTTGTCCTGGACCTCCCCGCTGCGCATGCGTACAATATAAAATCCTCGCTGCttttttt ttttttttttaatatgttt	444	1	y	3.7e-09	+++++++++++++++
chr7:19003006-19004179	76	AACGTTCTTTAGCAGATGAGGAAACTAAGGCAGCCGCCTGGCTCGGAAGCCTACAGTCTTATCATCCTGTAGCCT	95	2	y	2.7e-05	+++ + ++++++
chr7:19003006-19004179	376	CAGAGCAGAAACTGCTTTCCGGCTTctgggtatggtgtcgggactgtaaacccacaaggaggctgaagcagggag	433	2	y	2.9e-08	++++++ ++ +++++
chr7:19003006-19004179	676	tgtctgaggacagctgcagtgtacttacatataataaataaataaataaataaatctaaaaaaaaaaaaaaaaga	711	1	n	7.9e-07	+++ +++ +++ +++
chr7:19003006-19004179	676	tgtctgaggacagctgcagtgtacttacatataataaataaataaataaataaatctaaaaaaaaaaaaaaaaga	733	1	n	3.7e-09	+++++++++++++++
chr7:19003006-19004179	751	ttgtttaaaaaaaaaaaaaaGAAAGAAAGAGGGGGCGGGGAAAGGGGGGAAATTGCATCCACAGCAACTTGGCCA	759	1	n	8.2e-08	++++++++++++ ++
chr7:19003006-19004179	751	ttgtttaaaaaaaaaaaaaaGAAAGAAAGAGGGGGCGGGGAAAGGGGGGAAATTGCATCCACAGCAACTTGGCCA	781	2	y	4.3e-05	++ +++ + + +++
chr7:19003006-19004179	976	CCCCGACGGGACTACATTTCCCAGAAGGCTTTGCCCGCGCGTTATGTAACTTTCCCTGCGAAGCGGCCTCTGGGG CAGAAGAAggaggtggaggcgacggcggccgttgcagcggcgtcggcggcgcgagcggagcggcgggagcctggg	1046	2	y	2.5e-05	+ ++++++ + +++
chr19:5488070-5491554	601	CTAAGGCAGAAGCAGAAAGATCTCGAAATGTGCCAAGTCGGGGATATTTGTGCACAGAAGACTCAGGCTAGGTGA	602	2	y	9.2e-06	+++++++ ++++
chr19:5488070-5491554	751	ATGTGGGCACATGGTTGGATCCCGGGGATGCTAGTTAGACACTTCGCTTCTGTGGCTCATTAAAAGTGAAGGAGC CTCAGGGAGGATGAAGGTGGGAACCTTGCTGGGGCAGGGATGTCTCAAGCTGAGGGACACAGGGCTCAATAGAAC	821	2	y	2.9e-05	++++ + +++ +++
chr19:5488070-5491554	976	CCCAATTCGCAGACCCTCTTCTCAGTCTAGCTTTTGTGCACCCGCCTCTTTCCTCAAGCAGCCTTATAAGGAGCC	1016	2	n	7.3e-05	++ ++++++ + +
chr19:5488070-5491554	1201	GAAAAAGGTGGAGCCAGCCTTCTCCTTAGGAGGGGCCCTTGGGAGAGAAGGGGGTCAAGCTTCGGCCTCCACCTG	1256	2	n	8.9e-05	+ ++ ++ ++++++
chr19:5488070-5491554	1426	TATTCAGCTTGGGGAGGTCAAGGGCCCCGGTTTCCTTTGCCTCTGAGTTGTTTGCGACTTTGCCCTTTTTTTCTA	1455	2	n	8.9e-05	+ +++ ++++++
chr19:5488070-5491554	1651	TTTTCCTGTATCGTAAAAGAAACATAAAGAAGTtttttttttgttttgttttgttttgttttgttttttgatttt	1664	1	n	3.3e-05	++++ +++ + +++
chr19:5488070-5491554	1651	TTTTCCTGTATCGTAAAAGAAACATAAAGAAGTtttttttttgttttgttttgttttgttttgttttttgatttt	1683	1	y	6e-08	++++++++++ ++++
chr19:5488070-5491554	1651	TTTTCCTGTATCGTAAAAGAAACATAAAGAAGTtttttttttgttttgttttgttttgttttgttttttgatttt	1705	1	y	6.1e-07	+++ ++++ ++++++
chr19:5488070-5491554	1801	aaatccgcctgcctctgcctcccgagtgctgggattaaaggtgtgcgccaccatgcccggcCATAAGGAAATTTT	1808	2	n	4.3e-10	+++++++++++++++
chr19:5488070-5491554	2401	GCCCCTCATTGTGCGGCTCCTACTAAACGGAAGGGGCCGGGAGAGGCCGCGTTCAGTCGGATCCCGGCAGCAGCT	2432	2	y	7.8e-05	+ +++ + + +++
chr19:5488070-5491554	2476	GCGGCGGCTCAGGTCTTCAGTTGCTCTTTCTGTCTCCCTTTCGTTTCCGGAAACATGGTGAGCATTAGGCCACTG	2498	2	n	3.1e-05	++ ++++ ++++
chr19:5488070-5491554	2701	GCTGGGAAGGGCCGATTCGGACGTCGCTCGCGCGCCCCCTGGCTCCTCTCCCCTCCCCCATCCTGCCTTTGCGCC AGCGCGGCCACTGGCCGTGGGGGAGGGGTCCAGTGTGCGGGGCCTCGGGCAACGCTCGCTGGTTCTCGATGGCGC	2762	2	n	7.3e-05	+++++++ +++ +
chr19:5488070-5491554	2926	CGCCCCACCCAAGGGCTGTTCCCTTCCCCGCATCATCCTCCCTCTGCGGCTAGGTTGGTCTCCACAGCAGGTGGC	2962	2	n	3.3e-05	+++ +++++++ +
chr19:5488070-5491554	3151	TTCTAGAAAGAGCGATTACACACTCCATTCTGTAGTCACTGTACCTCGGGCTAGAGCTAGAACAGCGCGTGCGCA CATGCTTGGGCCCTGCCATCCCGGCTGCAGCTCTAGCCGAGCTAGGCCTTTTGCTGCTCTGCCGGATGGGGCCGA	3219	3	y	6.6e-05	+++ + ++ ++
chrX:48343473-48343890	1	ctctcccctcccctcccAGTGTCACCGGGGCTGCTTGGCTCTGCCCCCTTCGCCGCCGCTTGCTCCCAGCTTTAG	34	2	n	4.3e-06	+ ++ +++++++ ++
chrX:48343473-48343890	76	TccctccttctcatgcttgctccctcccttcgcctcctcctccccatcccccccctcGCCAAGGCCGCATTCTGG	98	2	n	9.2e-07	+++ +++ ++++++
chrX:48343473-48343890	226	GACCGGCACCCACTCCACCAGGCTTCGCTcacacacacagacacacacacacacacCGCTCTCCCCCTCACTCTT	267	3	n	7.7e-10	+++++++++++++++
chr7:16399906-16401301	1	CTGACTTCGGCTCTTTCCGGACTCTCGCCTCGCCCCCCCCCAGGGGGGGGCTTCTCCCATCCCGAAGCGCTTCGG	24	2	n	9.4e-05	+ +++++ ++ ++
chr7:16399906-16401301	226	CTGTGTTCGGCTCTTTCCGTGCCCTCTCCTCCGCCTCGCCCTTCCGCTTCGGCTCTTTTCGCCGACTTTCGGGCG	255	2	n	5e-05	+ +++++ +++ +
chr7:16399906-16401301	301	GGCTGGCTCTGCCCTTCTCCACGTGACGCTCCTCCGGCCTCTCCGCTACCCCCTCCCTCCACGCCCTTCCTCCGG CTTCAGCCTCCGTGCTTGTCCCGGCTGTGCCGCCATTTTGTGTGAATTCCTGACCGCGGCGGGGGCCCGGCAGCT	346	2	n	8.9e-05	+ ++ ++ +++++
chr7:16399906-16401301	301	GGCTGGCTCTGCCCTTCTCCACGTGACGCTCCTCCGGCCTCTCCGCTACCCCCTCCCTCCACGCCCTTCCTCCGG CTTCAGCCTCCGTGCTTGTCCCGGCTGTGCCGCCATTTTGTGTGAATTCCTGACCGCGGCGGGGGCCCGGCAGCT	365	2	n	3.1e-05	+++ ++++ + ++ +
chr7:16399906-16401301	526	ATCCCCCCTGCTCGCTCTCCTCTCCCCCCCTTTCCCTTCGCTTGCTCCGTCGCGCGCGGGCCCGCGCTAATTACA	550	2	n	5.3e-05	++ +++ + +++ +
chr7:16399906-16401301	601	CCCAACCACCCACCAGTGTCCGTGTCCCCCGGGTCTCAGGCCTTGGGGGGCCGCGTGTGTGTGTGCGTGCGTGTG	655	3	y	3.9e-09	+++++++++++ +++
chr7:16399906-16401301	826	AAACCGAAAAAAAAAATACTCGATATCGATCTATGTATCTATATGCCCAGTTCCCATCAGGAGGCCCCGGAGCGC	826	1	n	1.7e-06	++++ +++++++++
chr7:16399906-16401301	1126	CTGACGACAGGTCAGGCCCCCCGGCCTGGGCCGGGCAGCGTCCCCCGTgggagggggggaggaggaggaggaagg	1186	2	y	3.4e-06	+++++ ++++ +++
chr7:16399906-16401301	1201	ggacggCCGCCATGTTGGGCCGGGCCGCggaggaggaggaggaggaggaggaAGGGCGGGGTCGGTGGGTGTCTC	1241	2	y	3.4e-06	+++++ ++++ +++
chr7:16399906-16401301	1351	TCTCCCTCGCTCTCGCTCTGTCTTTTTTTGGGCGCCATGCTGAGG	1361	2	n	9.4e-05	++ +++++ ++
chr10:81605236-81606390	1	TCTGCTGGTCGAAGCCAGACTCCACAGGCTTCCAGAGACCGGAAGAAAAGGAGTGGGGGCAGGGTGTGTGTGTGT GTGGGGGGGCATGCTGAGGAGTCAGGGGGGAGGGTTGGGGGATGTGTGGGTGACTGTGAGGGACCTGGGGATCCT	64	3	y	7.7e-10	+++++++++++++++
chr10:81605236-81606390	1	TCTGCTGGTCGAAGCCAGACTCCACAGGCTTCCAGAGACCGGAAGAAAAGGAGTGGGGGCAGGGTGTGTGTGTGT GTGGGGGGGCATGCTGAGGAGTCAGGGGGGAGGGTTGGGGGATGTGTGGGTGACTGTGAGGGACCTGGGGATCCT	119	3	y	3.2e-05	+++++ +++ ++++
chr10:81605236-81606390	226	agtcagaggcagagggaatctcttgagttcgagacttgcctggtctgcatagtgtgcccttgtctcaaacaaaca aaaATTAAAATAAAACGAAGAAACAAAGAAAGTGAAAATGTTGAAAGCGAACGAAATTAAGGAGGAATAATTCCC	230	2	y	7.8e-06	++++++++++ +
chr10:81605236-81606390	226	agtcagaggcagagggaatctcttgagttcgagacttgcctggtctgcatagtgtgcccttgtctcaaacaaaca aaaATTAAAATAAAACGAAGAAACAAAGAAAGTGAAAATGTTGAAAGCGAACGAAATTAAGGAGGAATAATTCCC	296	1	n	6.7e-06	+++++++++ ++++
chr10:81605236-81606390	226	agtcagaggcagagggaatctcttgagttcgagacttgcctggtctgcatagtgtgcccttgtctcaaacaaaca aaaATTAAAATAAAACGAAGAAACAAAGAAAGTGAAAATGTTGAAAGCGAACGAAATTAAGGAGGAATAATTCCC	313	1	n	2.9e-05	++++ ++ +++ +++
chr10:81605236-81606390	376	AGCGTTGGTCATTCTGTGCTTTCAAGGGAAGATAGTACTGTGTGGGAGTGCTAGGAACTAAGTTTTATTTATTTa tatgcctgtgtattgccaggccagaaaggggctcggatctctggagctggagttaaaggtggatcgaacctgtac	439	1	y	4.6e-05	+++ +++ +++ + +
chr10:81605236-81606390	526	cttggcaagaacaggctgtgctctaaccactgggcctctcgccagccTTATCGATATACTTATTTtgtgtacatg tgtggccgcgagagccgcagggaatatgatggacgtcagaattaacacctgcggggctcaattctcaacttccac	590	3	y	1.4e-06	+++++ ++++++
chr10:81605236-81606390	1051	AAGCCGGAAGTTCTTTGTACGAAAAACTGGAACTTGATTGAAGCCGGAACAGGATGCAGAGAATGACCGGAACTG	1102	2	y	8.3e-05	+++ ++++++ +
chr7:64011915-64012119	76	GCCGGATGATGAAAGAGTTGCTGAGAGGAGAGGGCTGGAGAAGCAAAGGAAGAAGGCtgtgtgtgtgtgtgtgtg tgtgtgtgtgtgtgtgtgtgtgtgtgtgCTTCTGCTGCTAGGGTAGGAAGAGCA	114	2	y	1.3e-05	++ +++ +++ ++
chr7:64011915-64012119	76	GCCGGATGATGAAAGAGTTGCTGAGAGGAGAGGGCTGGAGAAGCAAAGGAAGAAGGCtgtgtgtgtgtgtgtgtg tgtgtgtgtgtgtgtgtgtgtgtgtgtgCTTCTGCTGCTAGGGTAGGAAGAGCA	134	3	y	7.7e-10	+++++++++++++++
chr7:64011915-64012119	76	GCCGGATGATGAAAGAGTTGCTGAGAGGAGAGGGCTGGAGAAGCAAAGGAAGAAGGCtgtgtgtgtgtgtgtgtg tgtgtgtgtgtgtgtgtgtgtgtgtgtgCTTCTGCTGCTAGGGTAGGAAGAGCA	150	3	y	7.7e-10	+++++++++++++++
chr7:64011915-64012119	76	GCCGGATGATGAAAGAGTTGCTGAGAGGAGAGGGCTGGAGAAGCAAAGGAAGAAGGCtgtgtgtgtgtgtgtgtg tgtgtgtgtgtgtgtgtgtgtgtgtgtgCTTCTGCTGCTAGGGTAGGAAGAGCA	166	3	y	3e-05	+++++++++++++
chr4:135313959-135314201	151	GGAAGTCTGAACCAAGCTGGACTCTGGGTGAGACTTTCTTTTTTTCATTTTGGGGTGTGTGTGTGTGTGCTCAAG	186	1	y	1.3e-05	++ +++++++ +++
chr4:135313959-135314201	151	GGAAGTCTGAACCAAGCTGGACTCTGGGTGAGACTTTCTTTTTTTCATTTTGGGGTGTGTGTGTGTGTGCTCAAG	205	3	y	7.7e-10	+++++++++++++++
chr11:19925602-19926303	1	GGGAAGCGCGCTCCTGGCATGTATGTGAGGGAGAGCGCGTGCCCGTGCGTGTGCCCGGCCCGCAGGCCCGAGGGG	39	3	y	1.9e-05	+++ +++ +++++
chr11:19925602-19926303	301	GCTCTGAGACTGCTGTTCAGTGGCTGTATTCGCTCACCACttttttttttttttttttttttttttttGTGAATA	341	1	y	3.7e-09	+++++++++++++++
chr11:19925602-19926303	301	GCTCTGAGACTGCTGTTCAGTGGCTGTATTCGCTCACCACttttttttttttttttttttttttttttGTGAATA	356	1	y	2.9e-05	+++++++++++++ +
chr11:19925602-19926303	376	AGACGTTCTCCTTTATTGTCACATGATATCCCTCCTCCCTTGCACATTCATAAATCCTGAGCCTGCCTCGGCTCC TTTCATTCAGTGCTGCCATTAGCCAAGGTAGCAGCGGCGCCTGCTTGGACTCCAGAATGGGTCCGCAGTCTCGGG	437	2	n	3.4e-06	++++++++ ++ +
chr11:116534011-116534575	376	ATGGGTGGAGGATCCCAACTGTTCCCGTAGCTCTCTTCGGCCCTCTAGCGACTGGTTGTGGACATTACCATTCTG Tttttgtttttcgaggcagggtttctctgtgtagccctggctgtcctggaactcactctgtagaccaggttggcc	446	1	y	4.1e-06	++ + +++++ ++++
chr11:116534011-116534575	526	ttgaactcagaaatccgcctgcctctgcctcccgagtgc	543	2	n	4.3e-10	+++++++++++++++
chr5:149052971-149053340	1	AATGTACTGCAATGGCTGTGAGAGCGGGAGCCAGACGCAGCCTCCTCACTCTCTCCGCTCTGTAACATTACTCTC	27	2	y	6.1e-05	++++ ++++ ++++
chr5:149052971-149053340	151	ACCAGAGCCCGCGCGCCATTGGCTGTCTGCGAGGACACGTCACCGAGGATTGAAACAGCGCGCAAATCTGAATGT GTGTGTGTGTGCCGGGCCGAGAGGCTGAGGCGGGAGAGGCAGCGGCAGAGGCAGCAGCTGCTACGGGAAAGCGGA	222	3	y	4.9e-09	++++++++++++++
chr5:149052971-149053340	151	ACCAGAGCCCGCGCGCCATTGGCTGTCTGCGAGGACACGTCACCGAGGATTGAAACAGCGCGCAAATCTGAATGT GTGTGTGTGTGCCGGGCCGAGAGGCTGAGGCGGGAGAGGCAGCGGCAGAGGCAGCAGCTGCTACGGGAAAGCGGA	245	2	y	3.5e-07	+++++ +++++ ++
chr5:149052971-149053340	151	ACCAGAGCCCGCGCGCCATTGGCTGTCTGCGAGGACACGTCACCGAGGATTGAAACAGCGCGCAAATCTGAATGT GTGTGTGTGTGCCGGGCCGAGAGGCTGAGGCGGGAGAGGCAGCGGCAGAGGCAGCAGCTGCTACGGGAAAGCGGA	266	2	y	5e-06	+ +++++++++++
chr2:32137913-32138345	76	TCGCGGAATCTCAGCCAATCGGAGCAAATTTCTGGGAGAGAGGCAGAAACTTCACCCAATCGCTTACCCCCGACC	108	2	y	3.8e-05	+ + ++++++++
chr2:32137913-32138345	151	ATAGCTCGTCCAATCACAATGCGAGACAGTAAACCCCTGCCCCTCCCCCCCAAAAAAAAACAAGAGGGGGAAAGG	186	2	n	1.3e-06	++++++ ++ ++ ++
chr2:32137913-32138345	376	atatatatatatatatatatatatatatTTTTTTTTTTTTTTGTTTTGttttgtttt	403	1	y	3.7e-09	+++++++++++++++
chr2:32137913-32138345	376	atatatatatatatatatatatatatatTTTTTTTTTTTTTTGTTTTGttttgtttt	418	1	y	1.1e-05	++++ ++++ ++++
chr1:120099662-120099899	151	gggtgcttggtaactctctctctctttccctttctctctctctctctctccacacacacacacacacacacacac acacacacacac	201	3	n	7.7e-10	+++++++++++++++
chr1:120099662-120099899	151	gggtgcttggtaactctctctctctttccctttctctctctctctctctccacacacacacacacacacacacac acacacacacac	217	3	n	7.7e-10	+++++++++++++++
chr5:129955978-129956189	76	AGCACCACCCTTCTTGAGGTCCAGATACACGTGGCCAAAGGAGCACCTCCATGGCCTAGGCGCGctctctctctc tctctctctctctctctctgtgtgtgtgtgtgtatgtgtgtgtatgtgtgtgtgtgtgtgt	141	2	n	1.9e-05	++ ++++ +++
chr5:129955978-129956189	76	AGCACCACCCTTCTTGAGGTCCAGATACACGTGGCCAAAGGAGCACCTCCATGGCCTAGGCGCGctctctctctc tctctctctctctctctctgtgtgtgtgtgtgtatgtgtgtgtatgtgtgtgtgtgtgtgt	176	3	y	1.7e-09	++++++++ ++++++
chr5:129955978-129956189	76	AGCACCACCCTTCTTGAGGTCCAGATACACGTGGCCAAAGGAGCACCTCCATGGCCTAGGCGCGctctctctctc tctctctctctctctctctgtgtgtgtgtgtgtatgtgtgtgtatgtgtgtgtgtgtgtgt	196	3	y	7.7e-10	+++++++++++++++
chr5:137569774-137571049	151	GCTTTGACAGGCACGAGGCAGGGACTGGGGTACTGGTGAGCCCCTACCTCTCAGATCTTTCTGGACCTGGGTAGG	164	2	y	4.1e-05	+++++++ + + ++
chr5:137569774-137571049	601	gacagacagCTTTGTGGTCAGATTAAACCACCAAGTCACCCCACTGAGATACCGCTGTTTGGAATCTGAGACAGG	661	2	y	4.6e-06	+++ + +++ ++++
chr5:137569774-137571049	901	CCTGTGACGGGAACCAAGTTGGCCAAAGTCTGCTCTGAGGTTTAAAAAAAAAAAAATTGATTGTTTTGCAGTCTG	946	1	n	1.6e-05	+++++++++++ +
chr5:137569774-137571049	1126	CTGCCTGTCAGGGCTGATAAGGGGCCCTCTAGGGCTCCCACAAACGGTTTATCGGGGTTTTGTGTGTGTGTGTGT GGACTACTTGCAGAGTTCAGGAGGGGGCACAAGCATGGAGCAACGTTGGGGTCTACTTCGGAGAGTGGTAAGACC	1187	3	y	7.7e-10	+++++++++++++++
chr5:130256792-130257119	1	CGAAGCGAGAAATAACAGTGGAGCAGGAAGCTCGCTTGCTTTTGCATCTCCCGCTCTGGACCGCGTTTCCCACAG	35	2	n	5e-05	+ +++ + +++ ++
chr5:130256792-130257119	151	ATGGCTTCTCTCTGGTCCCGCCTCTTTTCTATTTGAGCCTATCAGAGAGGAAGTTAGAGCTTCCGCTAGCTCCTT TTTTTTTTTTTTTTTTTCCTTCTGGGCCCGCCTCTGTCCCCTGCAGCCAACGCGGGCAGGTCTGCCGACTGCATG	224	1	y	3.7e-09	+++++++++++++++
chr5:130256792-130257119	151	ATGGCTTCTCTCTGGTCCCGCCTCTTTTCTATTTGAGCCTATCAGAGAGGAAGTTAGAGCTTCCGCTAGCTCCTT TTTTTTTTTTTTTTTTTCCTTCTGGGCCCGCCTCTGTCCCCTGCAGCCAACGCGGGCAGGTCTGCCGACTGCATG	252	2	n	1.2e-06	++ +++++++ + ++
chr11:74546396-74547702	1	tacagacagaggcagaaaaaacaccgacccacagaaaattaaaaaataaGTCTTagctgggcaggggtggtgcac	2	2	y	3.9e-06	++ +++++++++
chr11:74546396-74547702	1	tacagacagaggcagaaaaaacaccgacccacagaaaattaaaaaataaGTCTTagctgggcaggggtggtgcac	35	1	n	2.9e-05	++++ ++++++ ++
chr11:74546396-74547702	76	acctttaaacccagcacttgggaggcagaggcaggcggatttctgagttcgaggccagcctggtctacagagtga	96	2	y	4.3e-10	+++++++++++++++
chr11:74546396-74547702	151	gttccaggacagccagggctacacagagaaaccctgtctcaaaaaaccaaaaAAAGAAAaaaggaaaggaaagga	191	1	n	5.2e-07	++++++ ++++++++
chr11:74546396-74547702	451	acaataaaataaaaCTCAGATGTTGAGGGTGAGGTTACATCCCAGtttaaaaaattaaaataaaaaaaaattttt	506	1	n	5.1e-06	++++ +++++++++
chr11:74546396-74547702	601	CCTGTCTCTGCCTGATTATTGGGTTTCTCTCCCTTTGCAGCACGAGCTCTGGCTGCCTCTATCAAAGGCAGCAGG	601	2	n	4.3e-06	++++ ++++++++
chr11:74546396-74547702	751	AGGGGTCACGACCTCAGTCAGCCTCAGCCTTTCACTGAGAACCGAAGCTCCTGGGAGGAGGGGCAGGCACTGCGG	768	2	n	1.3e-05	+ +++++ ++++
chr11:74546396-74547702	751	AGGGGTCACGACCTCAGTCAGCCTCAGCCTTTCACTGAGAACCGAAGCTCCTGGGAGGAGGGGCAGGCACTGCGG	803	2	y	6.2e-06	++ + ++ ++++++
chr11:74546396-74547702	901	GCGAGCAATGAAGAGAGGGAGCAGAGACAGAAGGCAGGGAGCAGGGCAAAGAAGCAGAGAAGGGAAGTGGGGGTC GGGGGAGGCAGGCAAGGCATGTCATGAACAAGATCTATGGCATGCTCACCTACCCTAGTCAGAACTTTCATATTT	917	2	y	1.3e-06	++ ++++++ +++
chr11:74546396-74547702	901	GCGAGCAATGAAGAGAGGGAGCAGAGACAGAAGGCAGGGAGCAGGGCAAAGAAGCAGAGAAGGGAAGTGGGGGTC GGGGGAGGCAGGCAAGGCATGTCATGAACAAGATCTATGGCATGCTCACCTACCCTAGTCAGAACTTTCATATTT	950	2	y	1.9e-05	++ ++++++ ++
chr11:74546396-74547702	901	GCGAGCAATGAAGAGAGGGAGCAGAGACAGAAGGCAGGGAGCAGGGCAAAGAAGCAGAGAAGGGAAGTGGGGGTC GGGGGAGGCAGGCAAGGCATGTCATGAACAAGATCTATGGCATGCTCACCTACCCTAGTCAGAACTTTCATATTT	969	2	y	4.3e-05	++ ++ + ++ +++
chr9:65133990-65134109	1	cacacacacacacacacacacacacacacaGGCACTGAACCATACAGAGAAAGCCTGTCCATACCACCTGGGAGG	1	3	n	7.7e-10	+++++++++++++++
chr9:65133990-65134109	1	cacacacacacacacacacacacacacacaGGCACTGAACCATACAGAGAAAGCCTGTCCATACCACCTGGGAGG	17	3	n	5.1e-08	++++++++++++++
chr2:22811036-22811804	1	GCTGCTAACCCCAATAACACATTCAGCCTCATGGTTGGGCGTTCTCTCCTTTGACCTTTGGAAAGTACCACACAT GCACAGCCTCATGTCCTCATACTtgtgtgtgtgtgtgtgtgtgtgtgtgtgtgtgtgtgtgtAAATGTGAACTGT	69	3	n	4.6e-05	++++++ ++++ +
chr2:22811036-22811804	1	GCTGCTAACCCCAATAACACATTCAGCCTCATGGTTGGGCGTTCTCTCCTTTGACCTTTGGAAAGTACCACACAT GCACAGCCTCATGTCCTCATACTtgtgtgtgtgtgtgtgtgtgtgtgtgtgtgtgtgtgtgtAAATGTGAACTGT	100	3	y	7.7e-10	+++++++++++++++
chr2:22811036-22811804	1	GCTGCTAACCCCAATAACACATTCAGCCTCATGGTTGGGCGTTCTCTCCTTTGACCTTTGGAAAGTACCACACAT GCACAGCCTCATGTCCTCATACTtgtgtgtgtgtgtgtgtgtgtgtgtgtgtgtgtgtgtgtAAATGTGAACTGT	116	3	y	7.7e-10	+++++++++++++++
chr2:22811036-22811804	451	CTGTATATTTCCAGCAGAATTTTGATGAGGACATCATCTGAGAAGCCACATAGAGAGTAGTAGGGGCAGGGGAAG AGAGAGCAGGGAAAAGGCAGGGACAGGGGTCAAAGGGGTGTGCTGTCGGTCTGAGTTATTTCCTCTTGGGTGAGT	512	2	y	2.4e-05	+ +++++ ++ ++
chr2:22811036-22811804	451	CTGTATATTTCCAGCAGAATTTTGATGAGGACATCATCTGAGAAGCCACATAGAGAGTAGTAGGGGCAGGGGAAG AGAGAGCAGGGAAAAGGCAGGGACAGGGGTCAAAGGGGTGTGCTGTCGGTCTGAGTTATTTCCTCTTGGGTGAGT	538	2	y	1.9e-06	++++++ + ++++
chr5:33033275-33034431	1	CCCATTTAGCTTCTCTGCCTCTGCATGTCCCTCTTTCTGATATGGGGACATTCCTGCAACTCTGGACCTCCTTGC	14	2	n	1.4e-05	++++++++++ +
chr5:33033275-33034431	151	CTGCCACCTAGTGGGCTCGCTGGTGTTCACCACGCTCCACCGGAAGGCAGGAGCTGAGTTTGCAAGAGAGTTTGA	193	2	y	6.1e-05	+ ++++++ ++ +
chr5:33033275-33034431	301	GGGGTCCTAGAAGATTTCTTGGAATTTTGGAGATAGTGCATTTAAAAAAAAaaagatttatttattattatatgt	340	1	n	3.9e-05	+ +++++++++++
chr5:33033275-33034431	676	tcaggaggcaaaagcaggcagagctctgagttccagggcagccaaggctacacagagaaaccctgtttcgaaaac aaacaaacaaacaaacagatgaaccttatagtttaagctagtgtacgatttttgttgttgttgttggcccacatt	679	2	y	1e-07	+++++++ + +++++
chr5:33033275-33034431	676	tcaggaggcaaaagcaggcagagctctgagttccagggcagccaaggctacacagagaaaccctgtttcgaaaac aaacaaacaaacaaacagatgaaccttatagtttaagctagtgtacgatttttgttgttgttgttggcccacatt	747	1	n	4e-08	+++++++++++ +++
chr5:33033275-33034431	676	tcaggaggcaaaagcaggcagagctctgagttccagggcagccaaggctacacagagaaaccctgtttcgaaaac aaacaaacaaacaaacagatgaaccttatagtttaagctagtgtacgatttttgttgttgttgttggcccacatt	801	1	y	4.6e-05	+++ ++ ++ ++ ++
chr2:84656048-84656248	76	ttctgaggaagctgaggcaagagaattgctaatttgaggaagtcctaggcaacattatgagttcctgtcATGTTT	82	2	y	2.6e-07	+++ ++ ++++++ +
chr2:84656048-84656248	151	TTTAAAAAAATAAAAACAAAAAGAGAAATGTGGTTGGGGCTGAGATTTAA	158	1	n	1.8e-07	+++ +++++ +++++
chr2:163838246-163838426	76	AGACCAGCGGGAGCGGCTGCTTCAGCGTGAGGTGGAGATAGAGATAGCCAGTTtttgtttgtttgtttgtttgtt tgtGGTTATTGTTTTACTAAATGTGCTGAG	109	2	y	3.3e-05	++++ ++++ ++
chr2:163838246-163838426	76	AGACCAGCGGGAGCGGCTGCTTCAGCGTGAGGTGGAGATAGAGATAGCCAGTTtttgtttgtttgtttgtttgtt tgtGGTTATTGTTTTACTAAATGTGCTGAG	129	1	y	4e-08	+++ +++++++++++
chr2:163838246-163838426	76	AGACCAGCGGGAGCGGCTGCTTCAGCGTGAGGTGGAGATAGAGATAGCCAGTTtttgtttgtttgtttgtttgtt tgtGGTTATTGTTTTACTAAATGTGCTGAG	150	1	y	2.3e-05	++ + ++ ++++++
chr10:30763290-30763621	76	ACAGAGGGGGTTGGGATGATACCGCTGGCCCTGACAGGGGCAGGTAAGAGAAGAGAGTGGGAGGGAGGGGCAGTT	135	2	y	3.6e-06	+++++ ++ +++++
chr10:30763290-30763621	226	GTCACTCACGGTCTATTTGCCAGACCTCCCAAACCTTGTAGAGGTaaaaaaaaaaaaaaaaaaaaaaCCTCCTGT	271	1	n	3.7e-09	+++++++++++++++
chr1:33669759-33670499	151	ATGCTGGTTTTGTTTTTTGTTTTGTTGACGGATGTGAgttcttttgagaccatgtctcgcaccgaagcccaggct	158	1	y	9.7e-08	++++ ++++++++++
chr1:33669759-33670499	226	aacttggaattggtggcgatcctcctgcctcaacctcccacaagtgctgggcttaggctgagccgcaacacccgC	249	2	n	1.9e-08	++++++++ +++++
chr1:33669759-33670499	301	CCTAAGATATCTTGAATGCAAGTGATGGAGATTTTGTTGGGTTTTTTGTTTTTGTTTTCCAGAACCCCAGGTGCC	343	1	y	5.1e-08	+++++ +++++++++
chr1:33669759-33670499	376	CTCTCTGCGCGGAGACGCCTTTGGGCTTGGGGCTGCAGTGCAAACGGCAAACATTCCCGCGCTGCAGCCAGAGTC AGGGTAACTGAGGCTCCGGAAGCTTGCGGGCGCTTTACCGGGGGTGGCCTCCCCTCTGTCATTCCAGGAGGTGGG	439	2	y	3.3e-05	+ ++ +++++ ++++
chrX:48454187-48454553	1	acacacacagcacacacgcgcgcacgcacgcacacacacacacacagacacactcacacacagacacactcacac	31	3	n	7.7e-10	+++++++++++++++
chrX:48454187-48454553	1	acacacacagcacacacgcgcgcacgcacgcacacacacacacacagacacactcacacacagacacactcacac	55	3	n	4.4e-07	++++++++ ++++++
chrX:48454187-48454553	76	acGTCCCCGCGGGCGGAGGCTGGGCTGGGCGCGCAggaggcagggcgaggagggactgaagagcgggagggaggg	84	2	y	5.7e-05	+ +++ +++++ ++
chrX:48454187-48454553	76	acGTCCCCGCGGGCGGAGGCTGGGCTGGGCGCGCAggaggcagggcgaggagggactgaagagcgggagggaggg	111	2	y	3.6e-06	++++++++ + +++
chrX:48454187-48454553	76	acGTCCCCGCGGGCGGAGGCTGGGCTGGGCGCGCAggaggcagggcgaggagggactgaagagcgggagggaggg	135	2	y	5.3e-05	+++ ++++ +++
chr2:57117691-57117897	1	CACACTTGATTGGAAGGGACGAAGCTGCAGGAGCAAAGACAAGGTCTGCAATTGACTGATCTTGTCAGTAGGGGG	29	2	y	5e-05	+ +++ ++ ++ +
chr2:57117691-57117897	76	CCTGACTCCACAATGTTCAAGAGACAATCTCCCACACAAACACACAAGCACGCGTGCTTcacacacacacacaca	108	3	n	4.7e-07	++++++ +++++++
chr2:57117691-57117897	76	CCTGACTCCACAATGTTCAAGAGACAATCTCCCACACAAACACACAAGCACGCGTGCTTcacacacacacacaca	135	3	n	7.7e-10	+++++++++++++++
chr2:57117691-57117897	151	cacacacacacacacacacTTAGCTATTTACTACTTAGGCTAACTAAGCCTCGGGA	151	3	n	7.7e-10	+++++++++++++++
chr2:153108541-153109216	301	GGCGAGCTGTGGGGGTGCCGAGGAAGGAAGAACCCGTCCTAGGAGCAACCGATCCCCGGCGGTGGGATGCGCAGT	313	2	y	3.1e-05	++ ++ ++++ +++
chr2:153108541-153109216	451	TAGATAGAGGAAGCTCAGGCAGGGGAATGGCAGTGCTGAGCTGAGGCTTCTCTGTCTAACCAGGTTCCCCTTCTG	459	2	y	1.2e-06	+++ ++ +++++++
chr2:153108541-153109216	526	cacacacacacacacacacacacacacacacCAAGAAGAAGAAGCTGGAGGGGAGGGAAAGGCCCGTTCAGTTCC	526	3	n	7.7e-10	+++++++++++++++
chr2:153108541-153109216	526	cacacacacacacacacacacacacacacacCAAGAAGAAGAAGCTGGAGGGGAGGGAAAGGCCCGTTCAGTTCC	542	3	n	7.7e-10	+++++++++++++++
chr2:153108541-153109216	526	cacacacacacacacacacacacacacacacCAAGAAGAAGAAGCTGGAGGGGAGGGAAAGGCCCGTTCAGTTCC	559	2	y	5.7e-05	++ + +++ ++ ++
chr10:127641920-127643169	151	TGTTATCCTCCCCAACAAAAACTACAGGACAGTCCTCTGGTTATGATGGTGATTCAGAGGCTGAACAAGGGGCgt gtgtgtgtgtgtgtgtgtgtgtgtgtgACTCTAAGAGGCTCTGAGGGCTGTCATGTGTGAGAGCCTGCTGCTACA	224	3	y	7.7e-10	+++++++++++++++
chr10:127641920-127643169	301	TGTGTAAAGCTCAGACACGCGCgtgtgcgtgtgtgtatgtgtgtgtgtatgcgtgtgtgtgtgtgtgtgtgtgtT	329	3	y	1.7e-09	++++++++ ++++++
chr10:127641920-127643169	301	TGTGTAAAGCTCAGACACGCGCgtgtgcgtgtgtgtatgtgtgtgtgtatgcgtgtgtgtgtgtgtgtgtgtgtT	345	3	y	1.6e-08	++++ ++ +++++++
chr10:127641920-127643169	301	TGTGTAAAGCTCAGACACGCGCgtgtgcgtgtgtgtatgtgtgtgtgtatgcgtgtgtgtgtgtgtgtgtgtgtT	361	3	y	5.9e-06	++++++++++++++
chr10:127641920-127643169	976	CAGGTTCACCCCACTTTCTTCCTCTTCCTCCTCCAGCCCACTTTCTCTTCTCTGTGTCGTCAGAGCGCCAGGGAG	992	2	n	1.6e-06	++ +++++ +++++
chr10:127641920-127643169	1051	GGACCTGGGCAGACAGAGAAGCCGGAAACAGCAGGCCGGGGCAGCCAGGGTTTACAGTGAAGAAGGCCCGGAGAC	1081	2	y	8.9e-05	+ ++++ + +++++
chr10:127641920-127643169	1126	GAgtgcgtgcgtgcctgtgtgtgtgtttgtgtgtgtgtgcgcgcgctcgagcgtgtgcgcgcgtgcctgtgtgca tatgtgtgtgtgtgtctgtACACATTGAGTTTTTAGGGCCAGCCCAGGA	1148	3	y	9.7e-09	++++ ++++++++++
chr10:127641920-127643169	1126	GAgtgcgtgcgtgcctgtgtgtgtgtttgtgtgtgtgtgcgcgcgctcgagcgtgtgcgcgcgtgcctgtgtgca tatgtgtgtgtgtgtctgtACACATTGAGTTTTTAGGGCCAGCCCAGGA	1200	3	y	8.7e-08	+ ++++++++++++
chr9:110449048-110449253	1	TGTTGTCCTCTGATGAAAGTGTAAAGAATAGCAACTGGCAGCACCCATTGCATCTGCAAGTCATTATCCGTTtgt gtgtgtgtgtgtgtgtgtgtgtgtgtgtgtgtgcgcgtgcgcgagtgtgtgtgtgtgCTTGTATCCCTCCAGCCT	74	3	y	7.7e-10	+++++++++++++++
chr9:110449048-110449253	1	TGTTGTCCTCTGATGAAAGTGTAAAGAATAGCAACTGGCAGCACCCATTGCATCTGCAAGTCATTATCCGTTtgt gtgtgtgtgtgtgtgtgtgtgtgtgtgtgtgtgcgcgtgcgcgagtgtgtgtgtgtgCTTGTATCCCTCCAGCCT	90	3	y	7.7e-10	+++++++++++++++
chr9:110449048-110449253	1	TGTTGTCCTCTGATGAAAGTGTAAAGAATAGCAACTGGCAGCACCCATTGCATCTGCAAGTCATTATCCGTTtgt gtgtgtgtgtgtgtgtgtgtgtgtgtgtgtgtgcgcgtgcgcgagtgtgtgtgtgtgCTTGTATCCCTCCAGCCT	118	3	y	7e-08	+ +++++++++++++
chr9:110449048-110449253	151	CCTCTAGAGAGTGTCCTAAGGCAGGGACAAGGCTGGTCCTGGAGCTGCAAGGTTT	167	2	y	5.7e-05	++++++ + ++ +
chr7:68129125-68130242	226	TGGGGAGCTGAAGCTCAGCCCAACCCCGGGGCCCCACCGGAGTGAAGAGGGCCGAGCGCAGAGCCGGGGAATCCC TCCCTCCGCCTCCCGCCCTTGCTGCAGTTGTAAACACGCTTCCCTCCATGTCTGTTTTTCTTTCTCTAACCGTGG	299	2	n	8.3e-08	+++ ++++ ++++++
chr7:68129125-68130242	451	CCTCAGGACCCCTTTTCAGGCtttttttttttttttttttaattttCTCCCCGCTGCTAGGCACAAACTGAAGGA	472	1	y	3.7e-09	+++++++++++++++
chr7:68129125-68130242	676	CTGGGTTTTTGTTGTTGTTATTATTATTACTGGTCTGAGTCAAGCTGGATGCTATTTTGATTCTGCATTTTCTTC	681	1	y	2.4e-05	+++++ ++ +++++
chr5:124059857-124060013	1	TGCTGGGTGTGTGTGTGTGTGGGGGGCTTCCTCATTTTTGTCAGCCTCTTCCTCAAGGCTAGCCAGAGCCAAGCA	7	3	y	7.7e-10	+++++++++++++++
chr5:124059857-124060013	1	TGCTGGGTGTGTGTGTGTGTGGGGGGCTTCCTCATTTTTGTCAGCCTCTTCCTCAAGGCTAGCCAGAGCCAAGCA	41	2	n	4.1e-05	+ ++++++ ++++
chr19:10949241-10949544	226	CTGCGAGTTCTTGCAAGGGGATGGGGTGGGGGTATATTATacatacacacacacacacacacacacacacacaca cac	271	3	n	7.7e-10	+++++++++++++++
chr19:10949241-10949544	226	CTGCGAGTTCTTGCAAGGGGATGGGGTGGGGGTATATTATacatacacacacacacacacacacacacacacaca cac	287	3	n	7.7e-10	+++++++++++++++
chr5:140617014-140618183	76	GATTGGAGCCAGAGGGTGGTCCTGAGCCTGGAGGGCAGAACCTCAGCACGGAGCAGGAGGGGaacccagtgaggt	80	2	y	6.7e-06	++++ ++++++ ++
chr5:140617014-140618183	151	ggcataggtctctaacctagtattattcatgaggctgttgaggtaggaggattgtgagggtcgtgagatcagagc	183	2	y	8.9e-05	++ + ++++ +++
chr5:140617014-140618183	376	actgactgactgactgactgactgactgactgattgattaattgaTTttttttcaagacagaatttctctgtgta	413	1	y	5.2e-05	++ ++ +++++++
chr5:140617014-140618183	451	ggcctgcctggctgtcctggttgatctggaactcagattcacctgcctctgcctcccaagtgccgggattaaagg	492	2	n	4.3e-10	+++++++++++++++
chr5:140617014-140618183	676	aatctcagggatggggaggcagaggcaggaggatcgccaagagttcaaggccagcctaggctacctactgaatGA	690	2	y	4.3e-10	+++++++++++++++
chr5:140617014-140618183	751	TGCTCCTCCCCTCCCAGCTCTCAATAAAAGTAACACTGCACACCACGCAAGCTCTAGGGTGTCAGGGAGGGTGCA GAAGCAGGAAGGCACCCAGCTTCCTCTCTCGAGATGAGCTGGGTCTGGGAGAGGGTGGCAGGGTAGGGTTGAAGC	819	2	y	2.6e-06	++ +++++ +++++
chr5:140617014-140618183	901	TTTCAACTTCCCTCTCTGAACTTCCCTCCCCTCTGGGGTCAGCAGGGCTGACTTCCTGGAAGAGGTGCCTCACTG	911	2	n	8.3e-05	+++ ++ + +++
chr5:140617014-140618183	976	CTGGAGCCGGAAGGCCAAAACCACAGCGTGTGAGCAGAAGTCAGCATGTGTTTGTGGGTGTTCAAGCTTGGCACA	1021	3	y	6.2e-06	+++++ ++++ +++
chr15:102224689-102225456	1	ACCCGCGAGCCAGTAGCTCCTCTCGCCGCGCGCAGCGCCTCGCCTCTGCCTCTCCCGAGGCAGTGAAGTTCTGTA	39	2	n	9.2e-07	+ +++++++++++
chr15:102224689-102225456	451	ATAGGAAGGGGGTCAGTCACACCAGTTTCTGGGAAGGAGGACGATAAAGACGACAGAAAGACACACGTGCACGCa cgcgcgcgtacacacacacacacacacacacacacacacacacacacacgacgtctggtaccctgcactgactga	512	3	n	2.3e-06	+++++ +++ +++
chr15:102224689-102225456	451	ATAGGAAGGGGGTCAGTCACACCAGTTTCTGGGAAGGAGGACGATAAAGACGACAGAAAGACACACGTGCACGCa cgcgcgcgtacacacacacacacacacacacacacacacacacacacacgacgtctggtaccctgcactgactga	536	3	n	7.7e-10	+++++++++++++++
chr15:102224689-102225456	451	ATAGGAAGGGGGTCAGTCACACCAGTTTCTGGGAAGGAGGACGATAAAGACGACAGAAAGACACACGTGCACGCa cgcgcgcgtacacacacacacacacacacacacacacacacacacacacgacgtctggtaccctgcactgactga	552	3	n	7.7e-10	+++++++++++++++
chr15:102224689-102225456	601	caagccgCAGGGGAAGGAAATGGCTAGGTGGCTTCTCCGTGGGCAATGGTGCCAGCCCCTAGGGAACGGAAGAGG TAGATACAGACCAGCAGCTGTTCCCAGGGGCTTATCTCTCTAGCCACTGTCTAGGTCCTCTGCCTCCCTGACTAC	671	2	y	3.3e-05	++++ +++ +++
chr19:46618359-46618641	1	TACTGGGCTCCACAGAGTGTGCTTACCCCCcatacacacacacacacacacacacacacacacacacacacacac GAGCTCCTCTTCCGTTCTTGCAGCTGCTTCTTGCGCCATTCTTCCTCAGGAGCTCTTAGGCTGACGTCTCTACCC	35	3	n	7.7e-10	+++++++++++++++
chr19:46618359-46618641	1	TACTGGGCTCCACAGAGTGTGCTTACCCCCcatacacacacacacacacacacacacacacacacacacacacac GAGCTCCTCTTCCGTTCTTGCAGCTGCTTCTTGCGCCATTCTTCCTCAGGAGCTCTTAGGCTGACGTCTCTACCC	51	3	n	7.7e-10	+++++++++++++++
chr19:46618359-46618641	1	TACTGGGCTCCACAGAGTGTGCTTACCCCCcatacacacacacacacacacacacacacacacacacacacacac GAGCTCCTCTTCCGTTCTTGCAGCTGCTTCTTGCGCCATTCTTCCTCAGGAGCTCTTAGGCTGACGTCTCTACCC	67	3	n	1.5e-05	+++++++++ + +
chr19:46618359-46618641	151	AGCCCTTTTCTTTATTACGCAGCGCCTGTGTTTGTCTCCGTGTGTGCTTGTCTTTGTCCAAAACCGGGTAAGGAG GGTGAGGAAACTTCCCGCTTGCTTTGACAGCACATAGACTAGAGCTGTCAATCAGAA	178	3	y	7e-06	++++ +++ + +++
chr19:46618359-46618641	151	AGCCCTTTTCTTTATTACGCAGCGCCTGTGTTTGTCTCCGTGTGTGCTTGTCTTTGTCCAAAACCGGGTAAGGAG GGTGAGGAAACTTCCCGCTTGCTTTGACAGCACATAGACTAGAGCTGTCAATCAGAA	222	2	y	7.8e-05	+++++ ++++ +
chr10:61452743-61453131	1	gcagcagcaggagcagcagcggcagcagcggcaACGATGACTACCGGAAGCGGTCGAAGGCGGGAGCAAGGGGTA GTAGAGGGAGGGACAATATGGAAGCCGGACGTGACGTTGGAGGGCGTGTCTGAGGCGAGTGGGCGGGTAGCTGGG	56	2	y	5.3e-05	+ ++++ + +++ +
chr10:61452743-61453131	1	gcagcagcaggagcagcagcggcagcagcggcaACGATGACTACCGGAAGCGGTCGAAGGCGGGAGCAAGGGGTA GTAGAGGGAGGGACAATATGGAAGCCGGACGTGACGTTGGAGGGCGTGTCTGAGGCGAGTGGGCGGGTAGCTGGG	72	2	y	1.2e-05	++ + +++++ +++
chr10:61452743-61453131	151	GGCGTGACTGAGGCAGCCGAAGGCTAGAGGCAGAGGGTGAACCCGGAAATCCGGGAAAAAGGAAGTGTTGAAGGG	176	2	y	3.9e-06	++++++++++ +
chr10:61452743-61453131	301	GAGTGTAGGTGATTAAGGCACGCGGGAGGGGGGGGAAGCGGGgtgtgtgtgtgtgtgtgtgtgtgtgtgtgtgtg	343	3	y	7.7e-10	+++++++++++++++
chr10:61452743-61453131	301	GAGTGTAGGTGATTAAGGCACGCGGGAGGGGGGGGAAGCGGGgtgtgtgtgtgtgtgtgtgtgtgtgtgtgtgtg	359	3	y	7.7e-10	+++++++++++++++
chr8:25847733-25848608	76	gttgacctgcaactgtcgcagtaattagaatctgaatacacggtgtacaaaagAAAAAATAAAAAAAGAACCCTC	131	1	n	1.8e-06	++++ +++++++ ++
chr8:25847733-25848608	151	TTTCGCAAcctctcctctcctctcctcccctctcctctcctcccctctcccttctcccctcacctgcctcccctc tcccttcccctcccctcctctcctctcttctcatctcTGCCCCCTGCTTCCtttttagaaacagggtctcactat	190	2	n	5.3e-05	+ +++++ +++ +
chr8:25847733-25848608	151	TTTCGCAAcctctcctctcctctcctcccctctcctctcctcccctctcccttctcccctcacctgcctcccctc tcccttcccctcccctcctctcctctcttctcatctcTGCCCCCTGCTTCCtttttagaaacagggtctcactat	224	2	n	2.4e-05	++ +++ +++++
chr8:25847733-25848608	151	TTTCGCAAcctctcctctcctctcctcccctctcctctcctcccctctcccttctcccctcacctgcctcccctc tcccttcccctcccctcctctcctctcttctcatctcTGCCCCCTGCTTCCtttttagaaacagggtctcactat	255	2	n	4.3e-05	+ +++++++ ++
chr8:25847733-25848608	451	ggtgcacgcctttaatcccagcacttgggaggcagaggcaggtggatttctgagttcgaggctagcctggtctac	478	2	y	4.3e-10	+++++++++++++++
chr8:25847733-25848608	526	aaagtgagttccaggacagccagggctatacagagaaaccctgtctccggaaaagagagagagagagagagagag agagagagagagagagagagagagagagaTCATTGCGTTTGACATATACTGACTATAAAGTGAAGGAGACTCCTT	579	2	y	1.9e-05	+++ ++++ ++
chr8:25847733-25848608	526	aaagtgagttccaggacagccagggctatacagagaaaccctgtctccggaaaagagagagagagagagagagag agagagagagagagagagagagagagagaTCATTGCGTTTGACATATACTGACTATAAAGTGAAGGAGACTCCTT	595	2	y	1.9e-05	+++ ++++ ++
chr8:25847733-25848608	526	aaagtgagttccaggacagccagggctatacagagaaaccctgtctccggaaaagagagagagagagagagagag agagagagagagagagagagagagagagaTCATTGCGTTTGACATATACTGACTATAAAGTGAAGGAGACTCCTT	611	2	y	1.9e-05	+++ ++++ ++
chr11:70646918-70647454	1	CAAGGTGACACCAGCGCGCAACAGGGTGAGGGCGCGCGCGCGCACGCCCCTCCGACAGGCAAATCTGGCTCCAGC	33	3	n	8.5e-05	+ + + + + +++ +
chr11:70646918-70647454	76	TGGAAGCTGGGGCGGGCGCAGGCTCGGAGCGCAAAGGCAGCCGGGGAATAAGGCGGGGCTAAGATGCACGATGAA	77	2	y	5e-06	+++ ++ + +++ ++
chr11:70646918-70647454	151	GGGGCGTGGCCGATTTAGGAAGCTACCCTAAATTCCCGCCCCTCCGGAATTGGAATCGCGGGGAAAAAAAAAAAA AAAAAGCTTGTTTGAAAACCTCGCGAGAGCAAGTGAATCAGCCGAGTTCGGGCTATGAGGCCTCTCGCGATATAT	214	1	n	3.7e-09	+++++++++++++++
chr11:70646918-70647454	301	TTCAGCGGCGAAAGGGGGTGGGGGGGTGGAGGGAGGGTGGTGGCAAGCACTCTCGCGATACTTTGAACGTACCGT	322	2	y	5.4e-06	++ ++ ++++ +++
chr11:70646918-70647454	451	GTCTCCTGAGCATCGAAGCTCCCTCCATCTCCGCAGGCTCCTTCTACATGTCAAACATTTCTTTCAACCGGCCTC	468	2	n	5.3e-05	++ ++++ ++++
chr5:120503574-120503839	151	CTGTGGAAAAAAAAAAAAAAACCGCTCAGCATCCTTCCCTCCCAAGGAAtttctttctggtttttgtttgtttgc	157	1	n	3.7e-09	+++++++++++++++
chr5:120503574-120503839	151	CTGTGGAAAAAAAAAAAAAAACCGCTCAGCATCCTTCCCTCCCAAGGAAtttctttctggtttttgtttgtttgc	205	1	y	3.8e-06	++ + +++++++++
chr5:120503574-120503839	226	ttttgctttgtttttaaattatccttcctcttcctcacct	226	1	y	2.3e-05	++++ +++ +++++
chr5:120503574-120503839	226	ttttgctttgtttttaaattatccttcctcttcctcacct	248	2	n	7.3e-06	+++ +++++ ++++
chr13:110384718-110384924	1	ccacacacatccagtcctccttcctttttcttcagaaaagggccagccttgatgaatatcagccaaccacagcac	19	2	n	6.1e-05	+++ +++ + ++ +
chr13:110384718-110384924	76	ctcaagttgcaataagactaggtgcttcctcttctatgaaggctgcacaaggcaacccagtgtgtatgtgcgtgt gtgtgtgtgtgtgtgtgtgtgtgtgtgtgtgtgtgagagagagagagagagagaga	147	3	y	7.7e-10	+++++++++++++++
chr13:110384718-110384924	76	ctcaagttgcaataagactaggtgcttcctcttctatgaaggctgcacaaggcaacccagtgtgtatgtgcgtgt gtgtgtgtgtgtgtgtgtgtgtgtgtgtgtgtgtgagagagagagagagagagaga	163	3	y	7.7e-10	+++++++++++++++
chr13:110384718-110384924	76	ctcaagttgcaataagactaggtgcttcctcttctatgaaggctgcacaaggcaacccagtgtgtatgtgcgtgt gtgtgtgtgtgtgtgtgtgtgtgtgtgtgtgtgtgagagagagagagagagagaga	186	2	y	1.9e-05	+++ ++++ ++
chr11:114965588-114965821	1	TTGACCAGGCTGAAGATGCCTCCTGTCCACTGTAGGTCACAGGAAACCACATGATGGCTCTTACAGCCTCAGTGG GAGGGGCAGGGGGACACGTGTCACATAAACTCACATCATCAAGGGGCGTGGGGAgtgtgtgtgtgtgtgtgtgtg tgtgtgtgtgGAAAGAACTTCGTTTTCTGCAGTAAACCACAGCTATGGTGGTTCAGTGAATCTGAGAGCAACCTT	71	2	y	1.7e-05	+ ++ ++ ++++++
chr11:114965588-114965821	1	TTGACCAGGCTGAAGATGCCTCCTGTCCACTGTAGGTCACAGGAAACCACATGATGGCTCTTACAGCCTCAGTGG GAGGGGCAGGGGGACACGTGTCACATAAACTCACATCATCAAGGGGCGTGGGGAgtgtgtgtgtgtgtgtgtgtg tgtgtgtgtgGAAAGAACTTCGTTTTCTGCAGTAAACCACAGCTATGGTGGTTCAGTGAATCTGAGAGCAACCTT	130	3	y	7.7e-10	+++++++++++++++
chr11:114965588-114965821	1	TTGACCAGGCTGAAGATGCCTCCTGTCCACTGTAGGTCACAGGAAACCACATGATGGCTCTTACAGCCTCAGTGG GAGGGGCAGGGGGACACGTGTCACATAAACTCACATCATCAAGGGGCGTGGGGAgtgtgtgtgtgtgtgtgtgtg tgtgtgtgtgGAAAGAACTTCGTTTTCTGCAGTAAACCACAGCTATGGTGGTTCAGTGAATCTGAGAGCAACCTT	146	3	y	7.7e-10	+++++++++++++++
chr1:131126099-131126648	151	GAAAAGCTTGTGACAGCCTCCACCGGTTTCCTTTCGAAAAGTCCAGACTCTGTGCTGGTTGGCAAGGACTGCTCA TGCAAACAAACATCAGAAACCAATGTGTCACTTAGGGTAATGACCCTTTCAACTGTCTGCTCGGGACAGCAGGGC	224	3	n	1.2e-05	++ ++ +++ +++
chr1:131126099-131126648	451	TGAGTCATCTAGTACCCCAAAGTTAAAAAAAAAAAAAAACTCCTTTGAAGTGGCCTTGGCCAGTCTGAGAGTTCT GCCTCTGGCCTTGGTGCTGGGAAG	475	1	n	3.7e-09	+++++++++++++++
chr1:131126099-131126648	451	TGAGTCATCTAGTACCCCAAAGTTAAAAAAAAAAAAAAACTCCTTTGAAGTGGCCTTGGCCAGTCTGAGAGTTCT GCCTCTGGCCTTGGTGCTGGGAAG	523	2	n	3.5e-05	+++++++++ +
chr1:37890196-37890704	226	GTGAATGGGCCGGGACAAAAAAAAAAAAAAACCTTTCCCGGAACCAAAGAACCGTACGGTCTGTGACGGCAACGG	242	1	n	3.7e-09	+++++++++++++++
chr1:37890196-37890704	301	CGTGGTTTGAATGTTGCACTGGGTCCACCTGCCTCTGTTCCTCTCCTTCCGGCTGCGGGGACGTTCGGAGTGGAC	328	2	n	1.4e-06	++++++++++ +
chr5:125484024-125485361	1	caccccctgcctCCTTTCCTtctttttgagacaggcccgtgctggcctcaaactcctaatcctcttgcctccacc cccaggtgctggtctgtcaggcctgagttccccacttccTCTCCATTCCTTTCCTTCCTCTTTTTTTTTTttttt	64	2	n	7.3e-06	+ ++++++ ++ ++
chr5:125484024-125485361	1	caccccctgcctCCTTTCCTtctttttgagacaggcccgtgctggcctcaaactcctaatcctcttgcctccacc cccaggtgctggtctgtcaggcctgagttccccacttccTCTCCATTCCTTTCCTTCCTCTTTTTTTTTTttttt	136	1	y	3.7e-09	+++++++++++++++
chr5:125484024-125485361	151	tttttttttaaagattttatttattgattatatgtaagtacactgtagctgtcttcagacactccagaagaggga	165	1	y	3.5e-05	++++ +++ +++ ++
chr5:125484024-125485361	676	TGTGGATGTGGAGGGGCTCCTAGGTGGGTTGCTGAATGTCAACCTCCTCTTGGCATAACAGACACCTCTGCTGGG AGACAGAGAGGGCTGGCCAAAGACTGTTGCTTGATTCTGTCACCCACCCCCTAATCCTGACACCCCCCACCCCAA	749	2	y	5.3e-05	++++ +++++ +
chr5:125484024-125485361	901	ACTGCCTGGTCTATTCCCATCCTTCTTGTGTGTGCAGTGCGTGTTTGTCCATGTTCAGGACTGTGTAGTAGCACT	939	3	y	9.8e-05	+ ++++ +++ ++
chr5:125484024-125485361	976	TTTGTGCCTATTTGTGCGCAGGTGCATGTGTGTGCATGAGAGACAAGAGGACCACTCAGTTCCCCACACCAGTTT	979	3	y	8.1e-05	+++ + + ++++ +
chr5:125484024-125485361	976	TTTGTGCCTATTTGTGCGCAGGTGCATGTGTGTGCATGAGAGACAAGAGGACCACTCAGTTCCCCACACCAGTTT	997	3	y	4e-06	+++ ++++++++
chr9:103230327-103230694	76	GATGATCACCTCATTTCCTGAGCTGTGGGACAGAACTGCGCATGGAATCCACTACCACGACAATcacacacacac acacacacacacacacacacacacactcacTCAAAAAGCCTGTGTTTAGAAGGAAGCTAAAAGCAGAACCCACTC	140	3	n	7.7e-10	+++++++++++++++
chr9:103230327-103230694	76	GATGATCACCTCATTTCCTGAGCTGTGGGACAGAACTGCGCATGGAATCCACTACCACGACAATcacacacacac acacacacacacacacacacacacactcacTCAAAAAGCCTGTGTTTAGAAGGAAGCTAAAAGCAGAACCCACTC	156	3	n	7.7e-10	+++++++++++++++
chr9:103230327-103230694	301	TACTTGCCAACAGCTTCATCAACCTTATAGGGGGGCGGGGGGGGAGACTGAGGCTTGAGCGGAAGGG	343	2	y	2.4e-05	++++ + +++++ +
chr17:72918154-72918846	301	AGGACTCAGTGACTGgtttttttttgtttgtttgtttgttttgttttgttttgttttTCTTAATCACAAGGGCGT	319	1	y	1.5e-08	+++++++++++++++
chr17:72918154-72918846	301	AGGACTCAGTGACTGgtttttttttgtttgtttgtttgttttgttttgttttgttttTCTTAATCACAAGGGCGT	344	1	y	7.9e-07	++++ ++++ +++++
chr17:72918154-72918846	526	ACGGACACCCAGTGCGGGTTAACCCGCCAGCCTCAGCCCCTGCAGGAGTCGACGTCAAGGTTGCAAAGCTGGAGG TTGGGGGAGGCGGTGCTGAGAGCATCCAGACAAAGGAAGTGAACTCGGAACCTTCACTTAAGTGGCGGCCAGAGG	552	2	n	4.3e-06	++ +++++ +++ +
chr17:72918154-72918846	526	ACGGACACCCAGTGCGGGTTAACCCGCCAGCCTCAGCCCCTGCAGGAGTCGACGTCAAGGTTGCAAAGCTGGAGG TTGGGGGAGGCGGTGCTGAGAGCATCCAGACAAAGGAAGTGAACTCGGAACCTTCACTTAAGTGGCGGCCAGAGG	596	2	y	2.4e-06	+++++ + ++ +++
chr2:6436245-6436445	76	ACCGGCCTGAGGAGACAGAAAAAGAGACCCTTTCACCTTCCTGGGAAGTTACACTACTATTGGCATTTTGGAGCT	86	2	y	1.2e-05	++++ ++++ ++
chr2:6436245-6436445	151	TTTAAAGAGAAAAATGCTAAACAAACAAACAAAAACAAAGAAGAAGTAAA	169	1	n	4e-08	+++++++++++ +++
chr17:57275492-57275751	1	AGCTAGGCCCAGCCTCCGCTGCCCTCACCTGGCTGGTGCCCAGCCCCGGCCCCTGGCTCCGCCCCTATAAGCCCC	9	2	n	3.5e-05	++ +++++ ++ ++
chr17:57275492-57275751	1	AGCTAGGCCCAGCCTCCGCTGCCCTCACCTGGCTGGTGCCCAGCCCCGGCCCCTGGCTCCGCCCCTATAAGCCCC	52	2	n	1.4e-05	++++ +++ +++ +
chr17:57275492-57275751	151	AAGTCCCCGTCGGAAGCCGCGCTCCCTTTGaacctctgtgtgtgtgtgtgtgtgtgtgtgtgtgtgtgtgtgtgt gtgtgcgtGCGCGCGCGCCTGTGCATGTGCGCGC	188	3	y	7.7e-10	+++++++++++++++
chr17:57275492-57275751	151	AAGTCCCCGTCGGAAGCCGCGCTCCCTTTGaacctctgtgtgtgtgtgtgtgtgtgtgtgtgtgtgtgtgtgtgt gtgtgcgtGCGCGCGCGCCTGTGCATGTGCGCGC	204	3	y	7.7e-10	+++++++++++++++
chr17:57275492-57275751	151	AAGTCCCCGTCGGAAGCCGCGCTCCCTTTGaacctctgtgtgtgtgtgtgtgtgtgtgtgtgtgtgtgtgtgtgt gtgtgcgtGCGCGCGCGCCTGTGCATGTGCGCGC	220	3	y	3.9e-09	+++++++++++ +++
chr17:57275492-57275751	151	AAGTCCCCGTCGGAAGCCGCGCTCCCTTTGaacctctgtgtgtgtgtgtgtgtgtgtgtgtgtgtgtgtgtgtgt gtgtgcgtGCGCGCGCGCCTGTGCATGTGCGCGC	244	3	y	3.2e-05	++++ ++++ + +
chr6:31563941-31564181	76	CAGAGGAGGAAACTCCGCCCTGGAGCGCGGCGGGCGGGGGAGCAGGGGCTGGCGGTCCCGGGCAgtgcgtgtgtg	113	2	y	1.5e-05	++ ++++ +++ ++
chr6:31563941-31564181	151	agtgagtgtgtgtgtgtgtgtgtgtgtgtgtgtgtgtgtgtgtgtgtgtgtgtgCCTGTGAATCTGTGCTCACGC	156	3	y	7.7e-10	+++++++++++++++
chr6:31563941-31564181	151	agtgagtgtgtgtgtgtgtgtgtgtgtgtgtgtgtgtgtgtgtgtgtgtgtgtgCCTGTGAATCTGTGCTCACGC	172	3	y	7.7e-10	+++++++++++++++
chr6:31563941-31564181	151	agtgagtgtgtgtgtgtgtgtgtgtgtgtgtgtgtgtgtgtgtgtgtgtgtgtgCCTGTGAATCTGTGCTCACGC	188	3	y	7.7e-10	+++++++++++++++
chr1:93668830-93669085	151	GTGGCCTCGGCACTAGAGGAAGAAAacacacacacacacacacacgtacacacTCCCTTTCCATCTCCAGACTTT	177	3	n	7.7e-10	+++++++++++++++
chr5:123149782-123150011	76	GGGAGAGCAGTACTTAGGTTCTGCTGTCTGGTAGTGCTTGGTGTCTGTAAGAGCTCTTGCCCCGACAAGGCTGAG GTAGAGAGGACCCGTGGGAAGGGACAGGATAGGCAGAGGCTGGTGAGTTTAAAAAAAAAAAAAAAAAGGTTTCAG	141	2	y	4.3e-05	++++ ++++ ++
chr5:123149782-123150011	76	GGGAGAGCAGTACTTAGGTTCTGCTGTCTGGTAGTGCTTGGTGTCTGTAAGAGCTCTTGCCCCGACAAGGCTGAG GTAGAGAGGACCCGTGGGAAGGGACAGGATAGGCAGAGGCTGGTGAGTTTAAAAAAAAAAAAAAAAAGGTTTCAG	179	2	y	3.6e-06	++++++++++ ++
chr5:123149782-123150011	76	GGGAGAGCAGTACTTAGGTTCTGCTGTCTGGTAGTGCTTGGTGTCTGTAAGAGCTCTTGCCCCGACAAGGCTGAG GTAGAGAGGACCCGTGGGAAGGGACAGGATAGGCAGAGGCTGGTGAGTTTAAAAAAAAAAAAAAAAAGGTTTCAG	201	1	n	3.7e-09	+++++++++++++++
chr10:17796159-17796376	1	ACACCTACTGAAGCACAGGCAGACTTCTTTCTTGCTGCGTCACGGGTGTTTCCTTCCCCGCCCCCTCCTTTtgtg	9	2	y	2.5e-05	++ +++ ++++++
chr10:17796159-17796376	76	ggcgtgtgtgtgtgtgtgtgtgtgtgtgtgtgtgtgtgtgtgtgtgtgtgtgCAGTTTCTCCCTCCTTGTAAGAA	79	3	y	7.7e-10	+++++++++++++++
chr10:17796159-17796376	76	ggcgtgtgtgtgtgtgtgtgtgtgtgtgtgtgtgtgtgtgtgtgtgtgtgtgCAGTTTCTCCCTCCTTGTAAGAA	95	3	y	7.7e-10	+++++++++++++++
chr10:17796159-17796376	76	ggcgtgtgtgtgtgtgtgtgtgtgtgtgtgtgtgtgtgtgtgtgtgtgtgtgCAGTTTCTCCCTCCTTGTAAGAA	111	3	y	7.7e-10	+++++++++++++++
chr18:39489902-39491811	1	GAGGCGGCGCCACGGCGCGCACACACTCGCACACACGCGCTCCCACTCCAccccccggccgctccccgcccgagg	22	3	n	2.1e-07	+++++ + +++++++
chr18:39489902-39491811	301	GGCAGCGGCTGCCGACCTGGCCTGGGAGGGAAAGCGAGTTTCTTTAGTTTCTCTTCTCCCTGGCTCCTTCCCGCC	353	2	n	6.1e-05	+ + + +++ ++++
chr18:39489902-39491811	601	CTCGGGGTGGGGGGAGGCTTGGGGAGGGGACGGGAGGGCAGAGCAGAGGGTCAGCGCATACATACTGTGAGCCCG	613	2	y	2.1e-05	++++++ ++ +++
chr18:39489902-39491811	901	GCCTGCCAAGTTCAAACCTCCCCCCCCCCCCCCCACCGCTCCCTCCCTGCCTGCCAGCGCGCTCACATTCGGAGG	917	2	n	4.6e-05	+++ ++ + ++ ++
chr18:39489902-39491811	976	AAGTTGCACGGCGAATGCAAAACCCTCTTAGCGAGCTGGGTTTCTTTGCACTTaaaaaaaaaaaagaaaaaaaaa gaaaaaagaaaaaaaTTGTGATTAAGGAAGCCTTGCGGGGCGGGAGGGGGTGTGTGCAGGCCTAGAAGCAAGTTG	1029	1	n	8.2e-08	++++++++++++ ++
chr18:39489902-39491811	976	AAGTTGCACGGCGAATGCAAAACCCTCTTAGCGAGCTGGGTTTCTTTGCACTTaaaaaaaaaaaagaaaaaaaaa gaaaaaagaaaaaaaTTGTGATTAAGGAAGCCTTGCGGGGCGGGAGGGGGTGTGTGCAGGCCTAGAAGCAAGTTG	1046	1	n	1.6e-06	+++++ ++++++ ++
chr18:39489902-39491811	1126	CAGACGGAATAGTAAGTTGCTGGCGAAGTCCGCCCTCCTCTTACCCCAAACTCCTGACCTCTCCTTCCACCCCCT	1185	2	n	9.4e-05	++ + ++ ++ ++
chr18:39489902-39491811	1201	TCGGGGCCAGCATCCAAGCTCCCCGCGGAGGCCCCTCCCCCAAATCTTGACATTTGCTGCTCCAGGCTCAGTGCC TCGCTCTGCCTTCTTTCTGAGTTCCAGGGACCCCTCTGCCCCTCCAAATAAAACAAAACACGCATCTTTACAACG	1274	2	n	2.6e-06	+++ ++++++++ +
chr18:39489902-39491811	1201	TCGGGGCCAGCATCCAAGCTCCCCGCGGAGGCCCCTCCCCCAAATCTTGACATTTGCTGCTCCAGGCTCAGTGCC TCGCTCTGCCTTCTTTCTGAGTTCCAGGGACCCCTCTGCCCCTCCAAATAAAACAAAACACGCATCTTTACAACG	1322	1	n	2.7e-05	++ +++++++++ +
chr2:167368504-167368766	76	GCACAGCAAGTCAGCGTGAGATGCGGGCAGGAACTGGGACTTCCTCTCTCTGGCCGGCgtgtgtgtgtgtgtgtg tgtgtgtgtgtgtgtgtgtgtgtgtgtgtgtgtgtgtgtTTGACTTCCCTTTATCAAGAaattagcggcttgctt	134	3	y	7.7e-10	+++++++++++++++
chr2:167368504-167368766	76	GCACAGCAAGTCAGCGTGAGATGCGGGCAGGAACTGGGACTTCCTCTCTCTGGCCGGCgtgtgtgtgtgtgtgtg tgtgtgtgtgtgtgtgtgtgtgtgtgtgtgtgtgtgtgtTTGACTTCCCTTTATCAAGAaattagcggcttgctt	150	3	y	7.7e-10	+++++++++++++++
chr2:167368504-167368766	76	GCACAGCAAGTCAGCGTGAGATGCGGGCAGGAACTGGGACTTCCTCTCTCTGGCCGGCgtgtgtgtgtgtgtgtg tgtgtgtgtgtgtgtgtgtgtgtgtgtgtgtgtgtgtgtTTGACTTCCCTTTATCAAGAaattagcggcttgctt	166	3	y	7.7e-10	+++++++++++++++
chr1:193130222-193130523	76	GGCGTTACACCCTCTGGTCGCTATACTGCCCCCTGCCGGAGCGCCTCTAGCACATAGGCGTGTCTACGCATGCGT GATCGGAACACCAGCTCCTAGGGCTGCAGGGACTGGCTGTCTTTCCGGGATGGAGTGGCTTGCTTTGTGCTTATC	137	3	y	8.9e-05	++ + + ++ +++
chr1:193130222-193130523	226	TTTTACCttttttttttttttttttttCTCCAAAATTGAGGAGGACGAGGTTGGTGGTCCtttgtccctctccca	233	1	y	3.7e-09	+++++++++++++++
chr1:193130222-193130523	226	TTTTACCttttttttttttttttttttCTCCAAAATTGAGGAGGACGAGGTTGGTGGTCCtttgtccctctccca	265	2	y	4.1e-05	+++++ ++++ ++
chrX:37126720-37126890	76	GGACTCTGGGTCCGGGGGAAGGGGTTTACCGCTGTACACGGAACTGTTTCCAAgttggtttttttgtttgtttgt	134	1	y	1.5e-08	+++++++++++++++
chrX:37126720-37126890	151	ttgtttgcttgcttttttTC	154	1	y	2e-05	+++ +++ ++++++
chr11:102316723-102317054	1	GCTCCCGCCCTCCGGCCTCCTTCCCCCACCCGGGCAAAAAAAAAAAAAAAAAATTCTCCTCCTCCTCCTCCTCGG	36	1	n	3.7e-09	+++++++++++++++
chr11:102316723-102317054	76	TGAGCGCCCGCCCCGGGGAGGCCCCAGGCTGGAGGGCGGGGGAGGAAGGGCGGGTAAAGGGCGCGCGCGGGCATG	106	2	y	9.2e-06	+++++ + ++ +++
chr11:102316723-102317054	151	GAAGCGGGCACGCGCCTCAGTCTCCTCCTCCCGCTTTTCCCCGGCCGGTTCCCCCCGCCTCCGCAAcccggcggg	161	2	n	2.2e-05	+ +++++ + ++++
chr16:75909215-75909415	76	GGAAGTGTCTGATGTGACACTTCCTCCTCTGGTCAGGATGTGACTTCAGTGTCTGCTTGGTTGAAGGtttctttt ttttttttttttttttttcctttCCTTCCTTACCGTAATTATTTGGTAAC	147	1	y	3.7e-09	+++++++++++++++
chr10:91242622-91242852	1	AAACAGGAAGGTTTATTGTGTGACTGGCCACTAGCAGGGCTCAATCTGCCTTTCAGATCCACTGGTtgtgtatgt gtgtgtgtgtgtgtgtgtgtgtgAAGATTTGTGGGAAGGAAGAGGGGGAAGAAGTGGGTACATATTTCCGCATAT	74	3	y	7.7e-10	+++++++++++++++
chr10:91242622-91242852	1	AAACAGGAAGGTTTATTGTGTGACTGGCCACTAGCAGGGCTCAATCTGCCTTTCAGATCCACTGGTtgtgtatgt gtgtgtgtgtgtgtgtgtgtgtgAAGATTTGTGGGAAGGAAGAGGGGGAAGAAGTGGGTACATATTTCCGCATAT	110	2	y	5.3e-05	+ +++ +++++ +
chr11:106999308-106999864	226	AGCTGCGCGTTCATTGGTAGGTTTGAAAAACACGTTAGGCGGGGGTGGGGGTGGGACGCAGACGCAGGTCGTAGG	279	2	y	5.4e-06	+++ +++++ +++++
chr11:106999308-106999864	301	GGAAAAAAAAAAAAAAAGGTGGGGGTGGGGCGGTAAGCAGGGAAGCGTCGCGAGATGAGGGAGCGGCCGGGCAAT	303	1	n	3.7e-09	+++++++++++++++
chr11:106999308-106999864	451	ATGGACACTGGGCCGTACCCTGTTTGCTTTCCCTGGGCTTGTCCTTAAACAAACACACGAAATTATTATTACACT	497	1	n	1.9e-06	+++++++++ + ++
chr19:23273849-23274118	1	CGTTCCCGGCGAGCCGCAGCCCAGGAGCCTCCGCGCCCGGCTCCCGCGCTAACTGACCCCGCCTGACCCCGCCCC CGCGGCCCCGATGCGCTTGCGCGGTTCCGCCCCGCAAACCCGAGGCCACGCCCCGACCAACGCTCCCCGGTGGCC	62	2	n	3.3e-05	++++ + + +++ ++
chr19:23273849-23274118	151	TCAGAGGTGCGAtgtgtgtgtgtgtgtgtctgtgtgtgtgtgtgtgtgtgtatgtgtctctgtgtgtgtctctgt gtgtgtctctgtgtgtttctcgtgtgtgtgtgtgtgtgtgtgtg	164	3	y	7.7e-10	+++++++++++++++
chr19:23273849-23274118	151	TCAGAGGTGCGAtgtgtgtgtgtgtgtgtctgtgtgtgtgtgtgtgtgtgtatgtgtctctgtgtgtgtctctgt gtgtgtctctgtgtgtttctcgtgtgtgtgtgtgtgtgtgtgtg	182	3	y	7.7e-10	+++++++++++++++
chr19:23273849-23274118	151	TCAGAGGTGCGAtgtgtgtgtgtgtgtgtctgtgtgtgtgtgtgtgtgtgtatgtgtctctgtgtgtgtctctgt gtgtgtctctgtgtgtttctcgtgtgtgtgtgtgtgtgtgtgtg	212	3	y	3.5e-07	++++++++ + ++++
chr19:23273849-23274118	151	TCAGAGGTGCGAtgtgtgtgtgtgtgtgtctgtgtgtgtgtgtgtgtgtgtatgtgtctctgtgtgtgtctctgt gtgtgtctctgtgtgtttctcgtgtgtgtgtgtgtgtgtgtgtg	247	3	y	7.7e-10	+++++++++++++++
chr3:98339907-98340066	76	TTTTGATTGGTCAGAAATGCTTAAACTCTGCTGACTCCGCCTCCCCGGGCAGAGCCTCCCACACatttttttttt tttttttaa	105	2	n	1.3e-05	+++ +++ ++++++
chr3:98339907-98340066	76	TTTTGATTGGTCAGAAATGCTTAAACTCTGCTGACTCCGCCTCCCCGGGCAGAGCCTCCCACACatttttttttt tttttttaa	141	1	y	3.7e-09	+++++++++++++++
chr12:4843244-4843520	151	CTGTGACGTGAGCGGCCCCGGGATTTTACGTGTGGGACGGGGAGGCAGAAGACTAAGGTATTTCGTTGTGTGTGT GTGTGTGAAGTGGGTGGCACTTCAGGCCCAGGGATGTAGGCGTGGGGAGAA	185	2	y	2.1e-05	+++ + +++++++
chr12:4843244-4843520	151	CTGTGACGTGAGCGGCCCCGGGATTTTACGTGTGGGACGGGGAGGCAGAAGACTAAGGTATTTCGTTGTGTGTGT GTGTGTGAAGTGGGTGGCACTTCAGGCCCAGGGATGTAGGCGTGGGGAGAA	218	3	y	7.7e-10	+++++++++++++++
chr10:39731418-39732280	1	CTGCAGCACCGCAGAAGAGGAGGCGGGCGAGGCGGGGCGCGAGGCTCGCCCGGAGCTGGGGGGAGGGGAGGGCGG AGGAGGGAGCGAGCGCCAGGGCGGCCCTTTTATAGGCCGAGGCCCGCGCGCCCCCGCCCCTCGAGCTGGCCCGGG	22	2	y	4.3e-05	++ ++ +++++ ++
chr10:39731418-39732280	1	CTGCAGCACCGCAGAAGAGGAGGCGGGCGAGGCGGGGCGCGAGGCTCGCCCGGAGCTGGGGGGAGGGGAGGGCGG AGGAGGGAGCGAGCGCCAGGGCGGCCCTTTTATAGGCCGAGGCCCGCGCGCCCCCGCCCCTCGAGCTGGCCCGGG	52	2	y	9.4e-05	++++ + ++ +++
chr10:39731418-39732280	1	CTGCAGCACCGCAGAAGAGGAGGCGGGCGAGGCGGGGCGCGAGGCTCGCCCGGAGCTGGGGGGAGGGGAGGGCGG AGGAGGGAGCGAGCGCCAGGGCGGCCCTTTTATAGGCCGAGGCCCGCGCGCCCCCGCCCCTCGAGCTGGCCCGGG	67	2	y	5e-05	+++++ + + +++
chr10:39731418-39732280	301	CGCTGGCGGCTTCCCTTACCTTGTGAAAACAAAACAAAACAAAAAATATCCTCTCCGCGGCAGCCCCCGCCTCTT	331	1	n	3.4e-07	++++ ++++ +++++
chr10:39731418-39732280	601	cccgggcgcgcgcccgcccgcctcctcccccccccccgtcgccgctcgcgcgcgcgcacacacacacccctcctc	617	2	n	2.7e-05	++ +++++ ++ ++
chr10:39731418-39732280	601	cccgggcgcgcgcccgcccgcctcctcccccccccccgtcgccgctcgcgcgcgcgcacacacacacccctcctc	653	3	n	7.7e-08	+ + +++++++++++
chr10:39731418-39732280	751	GTGATTCCcggcggcggcggccgtggcggcagcagcagcggTACCACCCGACCCGACGAACGCGCGAGGGCTTCT CTCCCGCTGCCTCTCGCCCGGAGCGTCTGAGGAGGCG	825	2	n	2.5e-05	++ ++ +++++++
chr7:97361638-97361824	151	ATACATGAACTtgtgtgtgtgtgtgtgtgtgtgtgt	163	3	y	7.7e-10	+++++++++++++++
chr5:138187146-138188096	151	TCACAGTCTGAAATTATATAAAAATTTCATTCTACGTGCATGTGTAAAGATCATATTACTCTATTCTAATTACTT	182	3	y	7.7e-05	+ +++ +++++
chr5:138187146-138188096	301	CTTTCGGGCTGGCTCTGAGCATGCGCTGACCGTTCTATGatttttttttttttttttttaaaGCTTGCTGCGGGC	341	1	y	3.7e-09	+++++++++++++++
chr5:138187146-138188096	376	TTCGCCTAAATTTAAAGGGCCCGCTGCCTTCCAGAAGTTGGTCTGAAGGCAAAGGGTGGTTGTATGTGTGGACTG	431	3	y	1e-05	+++ +++ ++++++
chr5:138187146-138188096	601	ACATCTCCCTATCTACCTCCTGCCTCTCTAACTCTAGGCTGAATCAAATGGGCTAGGATAGATGGATCACTAGAC	619	2	n	9.4e-05	+++++++++ +
chr17:28736558-28736899	1	AGGTCAGGCCTTAGGGGGATAGTCACAAATAGATGCATAGAGTGTGCTCCGCCTCTGCTTGCCAGCACACTCTGC	48	2	n	1.5e-05	+ ++++++++ + +
chr17:28736558-28736899	76	TTAGCTACCTCCTAGTGCCTTGGTGGAAGGGGAGGTGGAGGTGGAGGCTGGGCTCATGGACTGAGTGGCGTGGCC	112	2	y	2.4e-06	+++++ +++++ ++
chr17:28736558-28736899	151	TCTTGTCTAAGACCCAACCACAGTGACTTTACTTCCTGCTGCATGGTGGTGACAAATGTGTGTGTGTGTGGCGGT	206	3	y	4.9e-09	++++++++++++++
chr10:127070302-127070512	1	TGCACCGTCCCACCCCTGCTTCTGGATTGGTGAAACTCGTGGCTAATCCAAGACATCCAGGACTTCAATGCCAAT	9	2	n	3.3e-05	++ ++ ++++ ++
chr10:127070302-127070512	76	CAATCTGCATTACGTCACCAGCCTGCCTCCCAGTCTTGCCCTTAGTTTCTTCATTGGAGGAAACTTAAaaaaaaa aaaaaaagaagaagaagaagaggaagGCGAAAGAAAGAAAGAAACCGAGGCCAGGGTTTC	142	1	n	3.7e-09	+++++++++++++++
chr10:127070302-127070512	76	CAATCTGCATTACGTCACCAGCCTGCCTCCCAGTCTTGCCCTTAGTTTCTTCATTGGAGGAAACTTAAaaaaaaa aaaaaaagaagaagaagaagaggaagGCGAAAGAAAGAAAGAAACCGAGGCCAGGGTTTC	163	2	y	6.2e-06	++ + +++++ +++
chr2:72979023-72980729	1	AGTGTCCTACCCGCGATGGGCGGGTTCAGAGAGGGAGACAGGGAGGGGGGTGGCGGTTAGGGCCGGGCCCGCTCG	28	2	y	7.8e-06	+++ +++ ++++
chr2:72979023-72980729	226	GGATCCCACCCGGGAGGGCGCGCACACTTGcacactcacacacacacaaacacacacacaaaAAggcggcgggcg	256	3	n	5.8e-08	+++++ +++++++++
chr2:72979023-72980729	226	GGATCCCACCCGGGAGGGCGCGCACACTTGcacactcacacacacacaaacacacacacaaaAAggcggcgggcg	272	3	n	3.5e-07	++ +++++++++++
chr2:72979023-72980729	376	CGCGCgggagggagggagggaaggagggagggCGAGGGGAGGAGAAAGCGGCGCGCGGGGAGCCCGGCCGCGCTC	398	2	y	2.2e-05	+++++ ++ + +++
chr2:72979023-72980729	601	TTTCGGGAGCTGCAGGCACAGCGCggggggaggggggaggaggagggtggggtggggaggaaggcgggtgcgggg	636	2	y	2.7e-05	+++++ ++++ ++
chr2:72979023-72980729	676	agggagggggCCCGCGAGCCGCGGCCACATTAGTGAgcgccgggcggcccgggccctgcccctcccctgccctcc	736	2	n	5.3e-05	+++ ++ +++++
chr2:72979023-72980729	751	ccccggccgcggcggccacggcggcggcggcgcgcTCCCTCCTCCCCTCCTGCTGCCCCCGCCCGCCGCGGCTGT	796	2	n	7.8e-05	+++ + +++++ ++
chr2:72979023-72980729	826	AACcctcctcctcctcgttccctcctcctcctccCCGCGCTGCCCCTGCCCcctctcctctcctctcctctcctc ccctttccCTCCGCGGCGCTCGCTCCTCTCGCACCGTCAGTCACTCGCACAcgcccgcccgccgccgccgcccgc gcccgcACACAGGGGGGATGCGCTcccggcggaccgggccgcccgcccggagcccggcgggcACTCGGCGCTGGG	845	2	n	3.5e-05	++ ++++ +++++
chr2:72979023-72980729	826	AACcctcctcctcctcgttccctcctcctcctccCCGCGCTGCCCCTGCCCcctctcctctcctctcctctcctc ccctttccCTCCGCGGCGCTCGCTCCTCTCGCACCGTCAGTCACTCGCACAcgcccgcccgccgccgccgcccgc gcccgcACACAGGGGGGATGCGCTcccggcggaccgggccgcccgcccggagcccggcgggcACTCGGCGCTGGG	864	2	n	4.6e-06	+++++ +++++ ++
chr2:72979023-72980729	826	AACcctcctcctcctcgttccctcctcctcctccCCGCGCTGCCCCTGCCCcctctcctctcctctcctctcctc ccctttccCTCCGCGGCGCTCGCTCCTCTCGCACCGTCAGTCACTCGCACAcgcccgcccgccgccgccgcccgc gcccgcACACAGGGGGGATGCGCTcccggcggaccgggccgcccgcccggagcccggcgggcACTCGGCGCTGGG	898	2	n	6.1e-05	+ +++ + +++++
chr2:72979023-72980729	826	AACcctcctcctcctcgttccctcctcctcctccCCGCGCTGCCCCTGCCCcctctcctctcctctcctctcctc ccctttccCTCCGCGGCGCTCGCTCCTCTCGCACCGTCAGTCACTCGCACAcgcccgcccgccgccgccgcccgc gcccgcACACAGGGGGGATGCGCTcccggcggaccgggccgcccgcccggagcccggcgggcACTCGGCGCTGGG	973	3	n	8.9e-05	+ + + + ++++++
chr2:72979023-72980729	1051	GCTGGAAGGGCTGGACAGCTGGCTGGCGGAGATGGGAGTGCGGCTTTCTGCCTCCGCCGACACTCGGTCGCACGC	1097	2	n	3.3e-05	+++++++ +++ +
chr2:72979023-72980729	1126	TCCCGGAGGCCGGGAGCcggcggtggcggccccgggctggctgtgggcggcagtggcagcggcggaggcagcgAG	1183	2	y	3.3e-05	+ +++ +++++++
chr2:72979023-72980729	1351	GGGGAATTTTTTTTTTCCTATTTTGATTGACTGTGCGGGAAACACAAAAGGTGGAGCCTCCAGCCCAAAAGGGGG	1359	1	y	2.3e-05	++++++++ + +++
chr4:45949250-45949432	76	GCAGGCCCCCACCACTacacacacacacacacacacacacacaGTTAGGTCATCACGGAAATAGGAAACAGAACA	93	3	n	7.7e-10	+++++++++++++++
chr4:45949250-45949432	76	GCAGGCCCCCACCACTacacacacacacacacacacacacacaGTTAGGTCATCACGGAAATAGGAAACAGAACA	109	3	n	7.7e-05	++++++++++ +
chr11:50415960-50416174	1	cacacacacacacacacacacacacacCCCACATGGCTTAGATGGAAGTGACCATAGCAGCTTCCTGTGGTGAGG	1	3	n	7.7e-10	+++++++++++++++
chr11:50415960-50416174	1	cacacacacacacacacacacacacacCCCACATGGCTTAGATGGAAGTGACCATAGCAGCTTCCTGTGGTGAGG	17	3	n	6e-05	+++++++++++ +
chr11:50415960-50416174	76	GGAGTGGACTGCGATGGGCAAAGGAGATGGTATAAAAGGGGAACTTCCACACGCATGCTCAATTCTGAGAGCAAC	123	3	n	9.3e-05	+++++ ++ + ++
chr11:50415960-50416174	151	TCCTGAAACAGAGAGGATGCCACCAGACTCACCTCTGTAACTAAATTAACTAAACAAAGCTGAA	194	1	n	5.2e-05	++ ++ +++ +++
chr4:123083034-123083213	1	TAGGCCTGTCTGAATTTCTGGCCTCTTTCTGCCCCCTGGCGGCCACAAGTAGACTAGCACCCAGGGGAGAGGGCA	22	2	n	2.9e-06	+++ ++++++ ++
chr4:123083034-123083213	151	Atttgtttttgtttttgtttttgtttttt	156	1	y	5.1e-08	+++++ +++++++++
chr19:61265424-61266853	151	GTCTTCCATCTTGGTGAGGTCAATGTGCAACTGAGTGACAGAACAAGGAAGTAGAAACAGACACACAGGCACAAC	197	2	y	6.7e-06	+++ + +++ +++
chr19:61265424-61266853	301	ccggccagatatttaccctctatgtgataagaattttcttTTTTCTTCTtttaattctcaggacctgcatggtgg	336	1	y	6.4e-05	++ ++++++ ++ ++
chr19:61265424-61266853	376	gttctcctaggttctggtgccctcttctggcatgcaggcatataggcagcagatagagcacacaaatacatacat	434	3	n	2.2e-06	++++++ + +++ ++
chr19:61265424-61266853	451	tgaaaactaataaTAATAATAACCAATAAATGAAAAGAAAAAAGATTGTAGCTTCTGcccagctgcatgggtagc agaggcaggcaggcagagaggacctctgtaagtttgaggctacccaagcctacagagcaaattccaggcagggct	478	1	n	4.9e-05	+++ ++++ +++++
chr19:61265424-61266853	451	tgaaaactaataaTAATAATAACCAATAAATGAAAAGAAAAAAGATTGTAGCTTCTGcccagctgcatgggtagc agaggcaggcaggcagagaggacctctgtaagtttgaggctacccaagcctacagagcaaattccaggcagggct	520	2	y	3.5e-07	++ +++++++++++
chr19:61265424-61266853	751	ttgtatgTGTGTGTGTTATATTTCAGCTGTGATTGCTGTCACTTGTCATCTAGTGGGCTTGTGTTTGGTTTCTTT CTTTCCATGTCATCTATCAAGTCGGGGCCATAGCACCCTTTCAGCCTCAGAAATCCAGAGCTCACTGACTCCTGG	751	3	y	8.7e-08	+++ ++++++++++
chr19:61265424-61266853	751	ttgtatgTGTGTGTGTTATATTTCAGCTGTGATTGCTGTCACTTGTCATCTAGTGGGCTTGTGTTTGGTTTCTTT CTTTCCATGTCATCTATCAAGTCGGGGCCATAGCACCCTTTCAGCCTCAGAAATCCAGAGCTCACTGACTCCTGG	815	1	y	7.6e-05	++ +++ +++ +++
chr19:61265424-61266853	901	AGAAAGGGTGCTAGGGGAGAAGGAAAAAAGAAATCTCTGGGGCAGGGGCAAGACTTGAGCCTTCTGGTCGACCTG	938	2	y	2.4e-05	+ +++++ ++++ +
chr19:61265424-61266853	1201	CCGTCAACAACGGTCTGGATCAACTAAACAAACCAATACAGATCGCTCACGCGCCGCCACATTCACTCACTTATT	1222	1	n	5.8e-06	++ +++++++ ++
chr19:61265424-61266853	1276	CCGTCTCTCCCGACGGTCCTCCCTAGCTTgggggggtggggggggggcggggaaggggaaggggtgggggACGAC ACTCACGCACGCATGATGGAGCAGCGTACCCACTCACCACTTCTCCCGAGTGGCACAAACGGTCCCCATCGTCCC	1317	2	y	8.9e-05	++ ++ + ++ +++
chr19:61265424-61266853	1276	CCGTCTCTCCCGACGGTCCTCCCTAGCTTgggggggtggggggggggcggggaaggggaaggggtgggggACGAC ACTCACGCACGCATGATGGAGCAGCGTACCCACTCACCACTTCTCCCGAGTGGCACAAACGGTCCCCATCGTCCC	1350	3	n	9.8e-05	+++ +++ +++ ++
chrX:20931541-20932308	226	AAACAAGAACCACctaggcgtgtgaacgttggcaagtcactttaaattctcagctttagttttcCTTTTTTTTtt ttttttttttgcaaggttttacaacatagccatacctgaaatttgctttaaacaccaggctggtcttgaacAGGC	291	1	y	3.7e-09	+++++++++++++++
chrX:20931541-20932308	526	TTGAAAACTTAGCCCTTTCCTAAAAGTGAGGTTCCTGTGGTCAGCATGTATGTGTGTGAGGTCAATGCAAGGGAA	569	3	y	1.7e-06	+ +++ ++++++++
chr6:124903690-124903930	76	TGTTGTCATGCCTGGGGCCAGAAAAGTCACCCACGGATGACAAACATGGGGGATGGGGCAGAGGTAACAACGTCA	123	2	y	2.7e-05	++ ++ + +++++
chr6:124903690-124903930	226	gtgtgtgtgtgtgtg	226	3	y	7.7e-10	+++++++++++++++
chr4:130297291-130297555	1	CTCACTTTATCAGACAAACAGGGAGAAGGCCAAGAAAGGAAAACAAGTACTAACAGGTCAGCTCAGAAGGACATG	25	2	y	3.8e-05	+ ++++ ++ +++
chr4:130297291-130297555	151	TACACTACTCCGAGCCTGACTCAGCTCTGCTGCGTTTTTTGTTTGTTTGTTTGTTTTGTTGTTGTTGGtttgatt tttttaagaccagatctcgctatgtagtagcctcagcta	188	1	y	4e-08	+++ +++++++++++
chr4:130297291-130297555	151	TACACTACTCCGAGCCTGACTCAGCTCTGCTGCGTTTTTTGTTTGTTTGTTTGTTTTGTTGTTGTTGGtttgatt tttttaagaccagatctcgctatgtagtagcctcagcta	215	1	y	3e-06	++ ++++ ++++++
chr17:33394347-33394874	226	ACACCTCACAAAAGCTACACGGGATTCAAAAATGGAGCCAGGGGCAGAAACTTCAGAACATCCGTGTTCCTCATT	259	2	y	2.4e-06	++++ +++ +++++
chr17:33394347-33394874	376	GCAGGATCAACAACCTCTCCCATACTTGACGCAAATGGGGaaaaaaaaaaaaaaaaaaaaGATAGAGCAACACCC	416	1	n	3.7e-09	+++++++++++++++
chr1:164135470-164136171	76	TGTGCATCAAGTGAAATACCCACATGCGGTTGAGGCAGGAAGGTACCACGAGGCCTGAAATCCACAAGCTATTGT	100	2	y	1.8e-05	+ ++ ++++++++
chr1:164135470-164136171	301	GCATTTCTGGCTTACAGCCTtctctctctctctctctctctctctctctctctctctctctctctctctctgtct ctctctctacacacacacacacacacacacacacacTGAACACAGGAAGACTTTGCAAGTGGCAGACTGTATCTC	321	2	n	1.9e-05	++ ++++ +++
chr1:164135470-164136171	301	GCATTTCTGGCTTACAGCCTtctctctctctctctctctctctctctctctctctctctctctctctctctgtct ctctctctacacacacacacacacacacacacacacTGAACACAGGAAGACTTTGCAAGTGGCAGACTGTATCTC	337	2	n	1.9e-05	++ ++++ +++
chr1:164135470-164136171	301	GCATTTCTGGCTTACAGCCTtctctctctctctctctctctctctctctctctctctctctctctctctctgtct ctctctctacacacacacacacacacacacacacacTGAACACAGGAAGACTTTGCAAGTGGCAGACTGTATCTC	363	2	n	3.1e-06	++ +++++ +++
chr1:164135470-164136171	301	GCATTTCTGGCTTACAGCCTtctctctctctctctctctctctctctctctctctctctctctctctctctgtct ctctctctacacacacacacacacacacacacacacTGAACACAGGAAGACTTTGCAAGTGGCAGACTGTATCTC	385	3	n	7.7e-10	+++++++++++++++
chr1:164135470-164136171	301	GCATTTCTGGCTTACAGCCTtctctctctctctctctctctctctctctctctctctctctctctctctctgtct ctctctctacacacacacacacacacacacacacacTGAACACAGGAAGACTTTGCAAGTGGCAGACTGTATCTC	401	3	n	5.1e-05	+++++++++++ +
chr12:85339126-85340256	226	TGGTGGCTCCTGCCCCCTGACCCGGAAGCGGTTCTTAGTGTTTCCGGCTCGCCGAGGTTTTCCCTCCGCCTTTCG	284	2	n	6.1e-05	+ ++++ ++++
chr12:85339126-85340256	526	TTGTTGGGCAGGGCTCCtttttttttttttttttttttttttttttGTAGCGATAGTGTAGCAAAGATAATGGAG	543	1	y	3.7e-09	+++++++++++++++
chr12:85339126-85340256	526	TTGTTGGGCAGGGCTCCtttttttttttttttttttttttttttttGTAGCGATAGTGTAGCAAAGATAATGGAG	560	1	y	3e-06	++++++++++++ +
chr12:85339126-85340256	601	CAAGCTAAAACATTAGACTTCTGACAACTTTAACAATTCCTTCTTCcttcctcctcctcctcctctcctcctcct	646	2	n	3.4e-06	+++ ++++ +++++
chr12:85339126-85340256	676	cctcctcttcctcctcctcctcctcttcctcctcctccttttcctccttttcctccttttccttctTCATTAAGT	681	2	n	1.2e-05	++ ++++ +++++
chr12:85339126-85340256	676	cctcctcttcctcctcctcctcctcttcctcctcctccttttcctccttttcctccttttccttctTCATTAAGT	699	2	n	1.2e-05	++ ++++ +++++
chr12:85339126-85340256	676	cctcctcttcctcctcctcctcctcttcctcctcctccttttcctccttttcctccttttccttctTCATTAAGT	727	2	n	6.5e-05	+++ + + + + ++
chr12:85339126-85340256	826	tcttttctttttttttttttttttAATGATATTATGGCCCCAGATCCTCAGAGCGCCATGAAAACAATGTTTATG TGTCTGTTGGGGGTGGGGTGGGGAttgttttaggtgatacagctagttaggaggaacttgagaggcaaaccctgc	833	1	y	3.7e-09	+++++++++++++++
chr12:85339126-85340256	826	tcttttctttttttttttttttttAATGATATTATGGCCCCAGATCCTCAGAGCGCCATGAAAACAATGTTTATG TGTCTGTTGGGGGTGGGGTGGGGAttgttttaggtgatacagctagttaggaggaacttgagaggcaaaccctgc	892	3	y	3.2e-05	+++ + +++++ ++
chr12:85339126-85340256	976	agtctggccccagaatTAGGAAAGGGCAGGGCGTGATGAAACTAAGGTTATGGGACTGGCGCCATTACACTTGTT GGGCAGAAGCAGGAAGTACACTTTGTATGTTGTACAGTTTGGTGTTTCCTGTGGACAGTGGGAAACTAAAGCAAA	1049	2	y	4.3e-05	++++++ +++++
chr11:48787901-48788210	151	ggcttacaccacacacacacacacacacacacacacagttctgcctgcagcccctgtctcccgccaacatatgga	160	3	n	7.7e-10	+++++++++++++++
chr11:48787901-48788210	151	ggcttacaccacacacacacacacacacacacacacagttctgcctgcagcccctgtctcccgccaacatatgga	176	3	n	3e-05	++++++++++++
chr11:48787901-48788210	151	ggcttacaccacacacacacacacacacacacacacagttctgcctgcagcccctgtctcccgccaacatatgga	197	2	n	3.8e-05	+ +++ +++ ++++
chr11:97041376-97041744	1	CTAGGAGACTGGACGCCAGGTCTGACGGAACGGGGGGAGGGGGGGAAGAGGAGAAAGAGGCCCAGCTCCACGCAT GCGCATAGCGGCCCTATCAGGCGCCACGCCCACTATTTCCGGGCCCGGGtttttgtttttttttttttttttttt	69	3	n	4.2e-05	+++ ++ + ++ +
chr11:97041376-97041744	1	CTAGGAGACTGGACGCCAGGTCTGACGGAACGGGGGGAGGGGGGGAAGAGGAGAAAGAGGCCCAGCTCCACGCAT GCGCATAGCGGCCCTATCAGGCGCCACGCCCACTATTTCCGGGCCCGGGtttttgtttttttttttttttttttt	131	1	y	3.7e-09	+++++++++++++++
chr11:97041376-97041744	151	ttttttttACTGCTGCCCCACAATCCTTAGCTACTTCCGTCTCCGCGCAGCGCGCATGGGAACTTCCTGTAGCGA	180	2	n	8.3e-05	++ + ++ + ++++
chr11:103017018-103017335	1	GCGGCTTCCTTTCACCCGCGCCGCTACCTACCGGGTCTCCGACTCGGCCTCAGCCTCCGTCGCTAGCCCAATCTC	44	2	n	6.9e-05	+ +++++ ++++++
chr11:103017018-103017335	151	CGGAAGGGGCGGGACCGGAAGGCGGGGCAGAGTGCCGGCCGCGTGCAGGAGATGAGGTGGGCGTGGCCGGGCCGA	167	2	y	2.7e-05	+++ + + +++++
chr11:103017018-103017335	226	GGTTTGGAGAGCTAGAGGTGGTCCAAGCTGAGtttttctctgtctctctctcttttttttttttttttttttttt gatttttcgagacaggg	258	2	n	3.5e-05	+ +++++ +++
chr11:103017018-103017335	226	GGTTTGGAGAGCTAGAGGTGGTCCAAGCTGAGtttttctctgtctctctctcttttttttttttttttttttttt gatttttcgagacaggg	278	1	y	3.7e-09	+++++++++++++++
chr11:103017018-103017335	226	GGTTTGGAGAGCTAGAGGTGGTCCAAGCTGAGtttttctctgtctctctctcttttttttttttttttttttttt gatttttcgagacaggg	293	1	y	5.1e-06	++++++++ +++++
chr5:135934413-135935238	76	GGCTTGGAGCTCGTGTGTCGGAGGGACCGACCCACGAAGCAAGCTACTGAGACGAGGAGGAGAAGGAGGCGGCAC	130	2	y	6.5e-05	+ + +++ + +++
chr5:135934413-135935238	226	CCCGCCCACACGGGTGACGTAAAAGTCACCGCCTACTCGCGCATGCGCGCGCCCCGCCCGGTCCCGCCCGGTCCT	263	3	n	9.3e-05	+ + ++ + + + +
chr5:135934413-135935238	376	ACACTGCTCCCTAATGTGCCCCTTTCTTCACTTTACCGTAAATCCTCAGCTTCATCAAACCCACCTCTCCTTGCC CCCTGGGGGCCTCTCCCCCCCCCttttttttttttttttttttttttttGCATAGCTTCTGGCGCGTGACCTCCT	439	2	n	2.4e-05	+++ + ++++ ++
chr5:135934413-135935238	376	ACACTGCTCCCTAATGTGCCCCTTTCTTCACTTTACCGTAAATCCTCAGCTTCATCAAACCCACCTCTCCTTGCC CCCTGGGGGCCTCTCCCCCCCCCttttttttttttttttttttttttttGCATAGCTTCTGGCGCGTGACCTCCT	474	1	y	3.7e-09	+++++++++++++++
chr5:135934413-135935238	376	ACACTGCTCCCTAATGTGCCCCTTTCTTCACTTTACCGTAAATCCTCAGCTTCATCAAACCCACCTCTCCTTGCC CCCTGGGGGCCTCTCCCCCCCCCttttttttttttttttttttttttttGCATAGCTTCTGGCGCGTGACCTCCT	489	1	y	8.9e-05	++++++++++++ +
chr5:135934413-135935238	601	TCCCAGTGGGCATTGCGCGCAGGCAGAGGCGGACCGGATGGGGGGCAGGGTCTAACCCGCAGCCGCTGGGGACCC	619	2	y	3.6e-06	+ ++++++++++ +
chr11:43426174-43426456	151	GCCCAGCTCTCGCGTCTGTCTCCAAAGTATTAAGGaaaacaaaactaaacaaaaccaaaaaaaaaaaaaaacaaa	159	2	n	5e-05	+ ++ ++++ ++++
chr11:43426174-43426456	151	GCCCAGCTCTCGCGTCTGTCTCCAAAGTATTAAGGaaaacaaaactaaacaaaaccaaaaaaaaaaaaaaacaaa	207	1	n	3.7e-09	+++++++++++++++
chr10:14705311-14705768	151	CTCCACTCCCGGAAGCGCTACTTCCTACTCGCCGGTCACAGATACTTCCGCTTCCGCCTCCGAGCGGGCAATTCT	197	2	n	8.5e-06	+ ++ ++ ++++++
chr10:14705311-14705768	376	GAGGTTTTAAATTTAACTTTTGTTTTTGTTTGTTTGTTTGCATGGAATGAATGAAAGAGAAGAAAGGGGAAAATA	400	1	y	4e-08	+++ +++++++++++
chr4:132178788-132178941	1	AGTATTACAGTTCCCAGTTTCTCGCGTTCAGGAAACTCAAAATCTTTTTGTTCCTCtgtgtgtgtgtgtgtgtgt	58	3	y	7.7e-10	+++++++++++++++
chr4:132178788-132178941	76	gtgcgcgcgcgtgtgcgtgtgtgtgAGATGTGTAATACAGAGACAGAGATCGGGATCACTCATGTACCACAACAC	86	3	y	7.4e-09	+++++ +++++++++
chr3:87885573-87886046	76	CAACAACCCCATTCTCTACCTCCGGGAACTCAGTGCAAAGCATGGCGGGAATTGCAGTCTAAAGGTGGCGTAAAG	84	2	n	9.9e-06	++ ++++ +++++
chr3:87885573-87886046	151	GGTGCGCAGAAAGACTGAGCGAAAGCTTCCTCTGATGCAGTGATTCCTGGGATTCGTAGTTTGTTTGTTTGTTTG	210	1	y	4e-08	+++ +++++++++++
chr2:167680046-167680291	76	GGAAGCGCCCCCTGGCGGTAGCTCTGCACATCGCACCTGCGGGTGTACCCAGGGTCGTGCCCATCAGGCTtgtgt gtgtgtgtgtgtgtgtgtgtgtgtgtgtgtTTCTGACATGGGGCCCTCAAACCACTGCCGCTGAGCTAATTGTAT	147	3	y	7.7e-10	+++++++++++++++
chr2:167680046-167680291	76	GGAAGCGCCCCCTGGCGGTAGCTCTGCACATCGCACCTGCGGGTGTACCCAGGGTCGTGCCCATCAGGCTtgtgt gtgtgtgtgtgtgtgtgtgtgtgtgtgtgtTTCTGACATGGGGCCCTCAAACCACTGCCGCTGAGCTAATTGTAT	163	3	y	7.7e-10	+++++++++++++++
chr8:72136861-72137014	1	GAAGGCTTTGATTGCAGGAAGGGGCGGAGCTCAAGATGACTTAGGAtgtgtgtgtgtgtgtgtgtgtgtgtgtgt gtgAATGAATGCATGGATGTGAACTAGAGCTCTTTCTGTTTTAAACAGTTGAAAATATGCCAAGATCAAAGTGTG	48	3	y	7.7e-10	+++++++++++++++
chr8:72136861-72137014	1	GAAGGCTTTGATTGCAGGAAGGGGCGGAGCTCAAGATGACTTAGGAtgtgtgtgtgtgtgtgtgtgtgtgtgtgt gtgAATGAATGCATGGATGTGAACTAGAGCTCTTTCTGTTTTAAACAGTTGAAAATATGCCAAGATCAAAGTGTG	64	3	y	7.7e-10	+++++++++++++++
chr18:73815376-73816698	76	CCCACACGCGCAGAGGTAGCGGAGAAAGAGGCGCGGGCCGGTGCCGGGCTGACCGACAGGCACGCGGGCCAATGG	96	2	y	7.3e-05	++++ ++++++ +
chr18:73815376-73816698	751	CGAATCCTTGAAAGCAGCAAGGAACCTACACATActctctctctctctttctctctctctctctctctctctctc tctctctctctctctctctcacacacacacacacacactcacacCCCTTCCCATATATGCTCCTACTCTCAGCTA	800	2	n	1.9e-05	++ ++++ +++
chr18:73815376-73816698	751	CGAATCCTTGAAAGCAGCAAGGAACCTACACATActctctctctctctttctctctctctctctctctctctctc tctctctctctctctctctcacacacacacacacacactcacacCCCTTCCCATATATGCTCCTACTCTCAGCTA	816	2	n	1.9e-05	++ ++++ +++
chr18:73815376-73816698	751	CGAATCCTTGAAAGCAGCAAGGAACCTACACATActctctctctctctttctctctctctctctctctctctctc tctctctctctctctctctcacacacacacacacacactcacacCCCTTCCCATATATGCTCCTACTCTCAGCTA	845	3	n	7.7e-10	+++++++++++++++
chr18:73815376-73816698	901	GGATTTTGGAGAATATTTATTTTTGTTTCAGAAACCGTAATCGCTAGGAATTGTTCAGTGTAATGGAATCTATTT	914	1	y	3.1e-05	+ +++ +++++++++
chr18:73815376-73816698	976	ACACTTAAGGAATAGAAACAGTAATTTAAAAAAGATAGAAGGGTAAATAAGAGGCAACAAAGAATAAGAAAATTA AAGGTGATGGAAATGTATAAGAAAAGTTTAAGAGAAGACAGGAAAACGAATTGTTCCCCTCAAAGCAGTTACAGG	1038	1	n	5.5e-05	++ ++ ++++ +++
chr5:112325390-112326503	301	acgcctttaaggccagcactcaggaggcagaggcaggcagatctcccgagttcgaggctaacctggtctacacaa	323	2	y	4.3e-10	+++++++++++++++
chr5:112325390-112326503	376	tgagttccaggacagtcagggctacacagagaaaccctgtctTTCTTTCTTTCTTTTTTTTGGGGGTGGGGGGtt	421	1	y	6.7e-06	+++ +++ +++++++
chr5:112325390-112326503	526	tcagaaatccacctgtctctgcctcctaagtgctgggattaaaggcgtgcgccaccacggcAGGATGAGAAACCC	537	2	n	1.9e-09	++++ ++++++++++
chr5:112325390-112326503	601	TGTCTTGAAAATTCACAAAACCAAAACCAAATCAAACCAACAAGAAACCCCAACTCCGTTCTTTCCCAGCGACAG	617	1	n	7.6e-06	++++ ++++ +++
chr5:112325390-112326503	601	TGTCTTGAAAATTCACAAAACCAAAACCAAATCAAACCAACAAGAAACCCCAACTCCGTTCTTTCCCAGCGACAG	634	1	n	5.2e-05	++++ +++++ +++
chr5:112325390-112326503	826	ACGAGACGGCCACTCAGCCTCAGTTCCGATGGGAACCAGAAGCAGCGCGAGGCGGGATCACCGGCCCTTCCGGGT	857	2	y	4.1e-05	+++ ++++ ++++
chr5:112325390-112326503	1051	AAGGCTGTGTGGCTCTCGCGGATGCTGAGCGAGGTGAGCAGGCGGCGGGGTGGCGTCCCGGGA	1070	2	y	1.9e-05	+++ ++ +++ +++
chr5:105110277-105110477	1	CCTCCTGCTCTCTTTGTTCCTCTTTTATGTGCGCTGACcacacacacacacacacacacacacacacacacacac acacacacacacacaGGATGCAGCAGAAACAAAACTGAAAGTAAAGTAAGCCAAGGCATTGTTAACTTGGCCAAG	39	3	n	7.7e-10	+++++++++++++++
chr5:105110277-105110477	1	CCTCCTGCTCTCTTTGTTCCTCTTTTATGTGCGCTGACcacacacacacacacacacacacacacacacacacac acacacacacacacaGGATGCAGCAGAAACAAAACTGAAAGTAAAGTAAGCCAAGGCATTGTTAACTTGGCCAAG	55	3	n	7.7e-10	+++++++++++++++
chr5:105110277-105110477	1	CCTCCTGCTCTCTTTGTTCCTCTTTTATGTGCGCTGACcacacacacacacacacacacacacacacacacacac acacacacacacacaGGATGCAGCAGAAACAAAACTGAAAGTAAAGTAAGCCAAGGCATTGTTAACTTGGCCAAG	71	3	n	7.7e-10	+++++++++++++++
chr11:3184727-3186097	76	GGAAAGAAAGGACTCCTGGGAGACATAACGATGGCACTACAGTCTTGATAAGTGCCCTACACACACTCATCACTG	131	3	n	5.7e-05	+ ++++++++ ++
chr11:3184727-3186097	526	GGCTATATATATATGAGGGATTGTTCTTACCTGGTAGCATTAGTAAGAGGCAGGGGAGGAATCTAACACACTTAT	571	2	y	3.8e-05	+++++++ ++ +
chr11:3184727-3186097	1051	ttctggtgtgtctgaagacagacagtgtattcacatacataaaacaaataaaaaaaatttttttcttgaaacagg	1092	1	n	6e-08	+++++++ +++++++
chr11:3184727-3186097	1126	gtttctctgtgtagctttggctgtcctggaactagctctatagaccaggctgtcttcaaactcatagatctgact gcctctgcctctgaaatgctgggattaaaggtacgcaccatcaccacctggTGGGAGAGGGGAGAAATTTTTTAA	1198	2	n	1.3e-07	+++++++++++++
chr4:41124265-41124616	1	AGCTTCCCACGTGGGCCGAAACGCCAACTCCAGGGCTCAAACCCTTGCCCCAGGCCCCACCCACTGCAGTTCCAT	44	2	n	7.3e-05	+ ++++ + + + ++
chr4:41124265-41124616	226	TCCTCACTTCCCTTTCGGGAAGGGAGGAGCTTACTGTGGCTTCCGGTGTGATGGGGTTTtgtgtgtgtgtgtgtg	286	3	y	7.7e-10	+++++++++++++++
chr4:41124265-41124616	301	tgtgtgtgtgtgtgtgtgtgtgtgtgtgtgtgtgtgtgtgtgtgtgtgtgt	302	3	y	7.7e-10	+++++++++++++++
chr4:41124265-41124616	301	tgtgtgtgtgtgtgtgtgtgtgtgtgtgtgtgtgtgtgtgtgtgtgtgtgt	318	3	y	7.7e-10	+++++++++++++++
chr4:41124265-41124616	301	tgtgtgtgtgtgtgtgtgtgtgtgtgtgtgtgtgtgtgtgtgtgtgtgtgt	334	3	y	7.7e-10	+++++++++++++++
chr19:12501637-12502355	226	GTCTGTTTTCAGCTCAGCACCGGCCGTGTCCGCGGCGTGAGCTCAGAGGCTCGCATCTCCCTACAGCTCGTGCAT GCATACGCATtctctctctctctctctctctctctctctctctctctctctctctctctGTcacacacacataca tccacacccacacacgcacgcaacaccccccacccacacacacacacacacaGGAATTGCCCCACGCTCTCCTTG	294	3	n	4.6e-05	+ ++ ++ ++ +
chr19:12501637-12502355	226	GTCTGTTTTCAGCTCAGCACCGGCCGTGTCCGCGGCGTGAGCTCAGAGGCTCGCATCTCCCTACAGCTCGTGCAT GCATACGCATtctctctctctctctctctctctctctctctctctctctctctctctctGTcacacacacataca tccacacccacacacgcacgcaacaccccccacccacacacacacacacacaGGAATTGCCCCACGCTCTCCTTG	311	2	n	1.9e-05	++ ++++ +++
chr19:12501637-12502355	226	GTCTGTTTTCAGCTCAGCACCGGCCGTGTCCGCGGCGTGAGCTCAGAGGCTCGCATCTCCCTACAGCTCGTGCAT GCATACGCATtctctctctctctctctctctctctctctctctctctctctctctctctGTcacacacacataca tccacacccacacacgcacgcaacaccccccacccacacacacacacacacaGGAATTGCCCCACGCTCTCCTTG	327	2	n	1.9e-05	++ ++++ +++
chr19:12501637-12502355	226	GTCTGTTTTCAGCTCAGCACCGGCCGTGTCCGCGGCGTGAGCTCAGAGGCTCGCATCTCCCTACAGCTCGTGCAT GCATACGCATtctctctctctctctctctctctctctctctctctctctctctctctctGTcacacacacataca tccacacccacacacgcacgcaacaccccccacccacacacacacacacacaGGAATTGCCCCACGCTCTCCTTG	343	2	n	1.9e-05	++ ++++ +++
chr19:12501637-12502355	226	GTCTGTTTTCAGCTCAGCACCGGCCGTGTCCGCGGCGTGAGCTCAGAGGCTCGCATCTCCCTACAGCTCGTGCAT GCATACGCATtctctctctctctctctctctctctctctctctctctctctctctctctGTcacacacacataca tccacacccacacacgcacgcaacaccccccacccacacacacacacacacaGGAATTGCCCCACGCTCTCCTTG	362	3	n	2.4e-08	++++++++++ +++
chr19:12501637-12502355	226	GTCTGTTTTCAGCTCAGCACCGGCCGTGTCCGCGGCGTGAGCTCAGAGGCTCGCATCTCCCTACAGCTCGTGCAT GCATACGCATtctctctctctctctctctctctctctctctctctctctctctctctctGTcacacacacataca tccacacccacacacgcacgcaacaccccccacccacacacacacacacacaGGAATTGCCCCACGCTCTCCTTG	380	3	n	3.2e-07	+++ +++++++ +++
chr19:12501637-12502355	226	GTCTGTTTTCAGCTCAGCACCGGCCGTGTCCGCGGCGTGAGCTCAGAGGCTCGCATCTCCCTACAGCTCGTGCAT GCATACGCATtctctctctctctctctctctctctctctctctctctctctctctctctGTcacacacacataca tccacacccacacacgcacgcaacaccccccacccacacacacacacacacaGGAATTGCCCCACGCTCTCCTTG	410	3	n	7.7e-10	+++++++++++++++
chr9:35305283-35305666	301	tggaatataagtccagaaacctaagaGACTCtgtgtgtgtgtgtgtgtgtgtgtgtgtgtgtgtgtgtggtgtgt gtgtgtgt	333	3	y	7.7e-10	+++++++++++++++
chr9:35305283-35305666	301	tggaatataagtccagaaacctaagaGACTCtgtgtgtgtgtgtgtgtgtgtgtgtgtgtgtgtgtgtggtgtgt gtgtgtgt	349	3	y	7.7e-10	+++++++++++++++
chr9:35305283-35305666	301	tggaatataagtccagaaacctaagaGACTCtgtgtgtgtgtgtgtgtgtgtgtgtgtgtgtgtgtgtggtgtgt gtgtgtgt	368	3	y	7.7e-07	+++++++++++++
chr8:122712035-122712376	76	CCTTCCTTACGAACTTCCCCCTGGCCAACCAGAAAGGTGTCAGGGGTTGAGGGGGGTGGAGGGGTGTGTGTGTGT GTGTGTGGGGTTACTGGGTGTGGGTCTGGGCTTTCCTGCTGCTACTTGATTAAAGGACATAGCAGTTGCTGGTGG	117	2	y	6.5e-05	+ ++ ++++ ++
chr8:122712035-122712376	76	CCTTCCTTACGAACTTCCCCCTGGCCAACCAGAAAGGTGTCAGGGGTTGAGGGGGGTGGAGGGGTGTGTGTGTGT GTGTGTGGGGTTACTGGGTGTGGGTCTGGGCTTTCCTGCTGCTACTTGATTAAAGGACATAGCAGTTGCTGGTGG	139	3	y	7.7e-10	+++++++++++++++
chr2:168154509-168154888	226	TTCTCTTCCTGCCTTCAGCAGTCCTGGTGGTAAAAACGCCGCATGACAGATGGCTAATACCGAAGCAAAGATGGA	227	2	n	6.1e-05	++ ++++++ +
chr2:168154509-168154888	301	GGCCGAGTCCCACACCTCCCCAGCACCCAGCCTCCTACACAATCATGCTTTtgtgtgtgtgtgtgtgtgtgtgtg	353	3	y	7.7e-10	+++++++++++++++
chr8:85025509-85027055	76	TCACGCTCAAGTCCCTGCAGGCGTCAACCTCTCCTTAGCAACCAGGCAAACATCCTGGCCAAGCTTTTTGCGTGA	114	3	n	8.5e-05	++ ++ ++ +++
chr8:85025509-85027055	676	TAGCTGCACGCAGCCAGCGGTtttctttctttctttctttctttttggtttttcgagacagggtttctttgtgta	713	1	y	1e-05	+++ +++++ ++++
chr8:85025509-85027055	751	gccctggctgtcctggaactcactttgtagaccaggctggcctcgaactcagaaatccgcctgcctctgcctcct	810	2	n	4.3e-10	+++++++++++++++
chr8:85025509-85027055	1426	CGGGAGGCGCCCGGCCCGGCGGGCAGCGGCAGGAGCCGATGGGCTGAGTCGGGACCGGGAACGTCACCCGAGAGT	1444	2	y	5.3e-05	+ +++++ ++++++
chr4:32768179-32768413	1	gtgtgtgtgtgtgtgcgcgcgcgcgcgtgtgtgtgAGATGAGGAAGTACTACATGAAGGTGGCTTACATTCTGCT	1	3	y	7.7e-10	+++++++++++++++
chr4:32768179-32768413	1	gtgtgtgtgtgtgtgcgcgcgcgcgcgtgtgtgtgAGATGAGGAAGTACTACATGAAGGTGGCTTACATTCTGCT	21	3	y	1.4e-06	+ + + +++++++++
chr17:25222191-25222523	1	TTGACTACGGAGGACTCAGCCTATGAGCGctcccttccttccacctcccgccccggtatcccgccccccccctcg	34	2	n	3.1e-05	+ + + ++ +++++
chr17:25222191-25222523	226	CgtgagtgtgtgtgtgtgtgtgtgtgtgtgtgtgtgtgtgtgtgtgtgtgtgtgtgtgGCGGGGGGGTGGGGGGG	231	3	y	7.7e-10	+++++++++++++++
chr17:25222191-25222523	226	CgtgagtgtgtgtgtgtgtgtgtgtgtgtgtgtgtgtgtgtgtgtgtgtgtgtgtgtgGCGGGGGGGTGGGGGGG	247	3	y	7.7e-10	+++++++++++++++
chr17:25222191-25222523	226	CgtgagtgtgtgtgtgtgtgtgtgtgtgtgtgtgtgtgtgtgtgtgtgtgtgtgtgtgGCGGGGGGGTGGGGGGG	263	3	y	7.7e-10	+++++++++++++++
chr8:115276417-115276662	151	AAACCAGGAAGAAAGTTGTTTACTGGAAAGAATTTTCATTTTGAGTTTCAATATAAAATCAGAGGCTCtgtgtgt gtgtgtgtgtgtgtgtgtgt	220	3	y	7.7e-10	+++++++++++++++
chr17:48299332-48301186	226	CCAGGAAAAACAGAGCCAGGGAAATACGGGAAGAgggagagggagaaggagaggggagaggggagaggggagagg	231	2	y	2.7e-05	+ +++++ ++++
chr17:48299332-48301186	226	CCAGGAAAAACAGAGCCAGGGAAATACGGGAAGAgggagagggagaaggagaggggagaggggagaggggagagg	257	2	y	1.4e-06	++++ +++++ ++
chr17:48299332-48301186	376	ggggagaggggaggagaggggaggagaggggagaggggagaggagaggggaggagaggggagagggagaggCTGC	385	2	y	7.8e-05	+++++ ++ +++
chr17:48299332-48301186	376	ggggagaggggaggagaggggaggagaggggagaggggagaggagaggggaggagaggggagagggagaggCTGC	430	2	y	1.9e-05	+ ++ +++++ ++
chr17:48299332-48301186	451	GCGCACgtgtgtgtgtgtgtgtgtgtgtgtgtgtgtgtgtgtgagagagagagagagagagagagagagagagag	457	3	y	7.7e-10	+++++++++++++++
chr17:48299332-48301186	451	GCGCACgtgtgtgtgtgtgtgtgtgtgtgtgtgtgtgtgtgtgagagagagagagagagagagagagagagagag	473	3	y	7.7e-10	+++++++++++++++
chr17:48299332-48301186	451	GCGCACgtgtgtgtgtgtgtgtgtgtgtgtgtgtgtgtgtgtgagagagagagagagagagagagagagagagag	494	2	y	1.9e-05	+++ ++++ ++
chr17:48299332-48301186	451	GCGCACgtgtgtgtgtgtgtgtgtgtgtgtgtgtgtgtgtgtgagagagagagagagagagagagagagagagag	510	2	y	1.9e-05	+++ ++++ ++
chr17:48299332-48301186	901	TTTTCTCTGGCCCAGGGGCCCCAAGACAGGGTGGAGCAGCCACACCTGCCTGAAGTTCTGAGGAAGAGGGCGGAA ACAGACAGCTCCCGCCCTCGCCCTCACCCTCACTTTCTCTCCCCACAATTGTGATAGGCTCCACTGGGGGCATTG	966	2	y	7.3e-05	+ +++ ++ +++
chr17:48299332-48301186	901	TTTTCTCTGGCCCAGGGGCCCCAAGACAGGGTGGAGCAGCCACACCTGCCTGAAGTTCTGAGGAAGAGGGCGGAA ACAGACAGCTCCCGCCCTCGCCCTCACCCTCACTTTCTCTCCCCACAATTGTGATAGGCTCCACTGGGGGCATTG	1003	2	n	6.5e-05	+++ ++ + ++++
chr17:48299332-48301186	1126	GGTGGCATGCCTGGGATCAGTGTGGGTCCTGCCCCTCGATCCCCGGGCTGACTGTGACATTGCATCTGGATGGAG	1153	2	n	5.3e-05	++++++ ++ +++
chr17:48299332-48301186	1201	CCATGGCCTCTTACGTTCctgctgttgctgctgctgctgctgTGGCTACAGGGCTGTGTCTCAGGTGAGAGGCAG GGGTGGGGGTGGGGTTGGTAGAAGAGAAAGACTACTTCCCCTGTCTACCCCACACTGCCTCTTCTTGTTCCACTA	1268	2	y	8.5e-06	+++++++ ++ ++
chr9:14500428-14500745	1	TAAGCTGCCTTGGCTCCGCCCCTAGGCAACGTCATTCCATCTTTTTCCCGTGTCTTTGCTGATTGGTCACTGCGT	9	2	n	7.8e-05	+ ++ +++ +++ +
chr9:14500428-14500745	76	CAGCCTGTGAGAGACGGTTTaaaaaaaaaaaaaaaaaaaaCACACACACAACTCCGGAATTGCTTCCGGGTGTGG	96	1	n	3.7e-09	+++++++++++++++
chr9:14500428-14500745	76	CAGCCTGTGAGAGACGGTTTaaaaaaaaaaaaaaaaaaaaCACACACACAACTCCGGAATTGCTTCCGGGTGTGG	113	1	n	4.4e-05	+++++ +++ + ++
chr15:99416602-99416847	151	CATCTACTGGCAACATTTTCTCAAGTGGAGGGAAAGGAGtttttttttgtttgtttgtttggttttttttttttt	192	1	y	1.5e-08	+++++++++++++++
chr15:99416602-99416847	151	CATCTACTGGCAACATTTTCTCAAGTGGAGGGAAAGGAGtttttttttgtttgtttgtttggttttttttttttt	209	1	y	8.2e-08	++ +++++++++++
chr17:34912105-34912441	1	CCACCCAGCCAGCCACCAGGGATGCTAATCCCCAGAACACAGGCTcacacacacacacacacacacacacacaca cacacacGTCATCTCCCACCATGCCTGCTCAGGTCTTGCAGGCTCCACCTGTACAGAGCCTCCCACCTGCCTGTC	46	3	n	7.7e-10	+++++++++++++++
chr17:34912105-34912441	1	CCACCCAGCCAGCCACCAGGGATGCTAATCCCCAGAACACAGGCTcacacacacacacacacacacacacacaca cacacacGTCATCTCCCACCATGCCTGCTCAGGTCTTGCAGGCTCCACCTGTACAGAGCCTCCCACCTGCCTGTC	62	3	n	7.7e-10	+++++++++++++++
chr17:34912105-34912441	151	TACAGCTGCACAGCGACCCCTAGTGGCTGGACCATGTCCTGCATCTCTCCCCTGGGCTCTGAGAACTGAGTGGGA	188	2	n	3.1e-05	+++++ +++ + ++
chr3:104818238-104818759	1	TCCTCCGTCCTTCTCCTACCTGAGCCTTCCTTTCGGTCTCTTCGTCCTATCCCCTCCCCCCCTTCACATTAACTC	15	2	n	1.2e-05	+++ +++ ++++ +
chr3:104818238-104818759	376	GCCCCCTCCCCCATTCCCTCCCTCCTCTGGCTTTCTGATACAGAGGAAGGCAGAAGTCAAAGTtgtgtgtgtgtg tgtgtgtgtgtgGGGAATGGATGGAGGGAGAGCAAGTGTCTCTATAGATAAAGGGGTGTGCGTGTGGGAGA	386	2	n	7.8e-05	++ + ++ +++++
chr3:104818238-104818759	376	GCCCCCTCCCCCATTCCCTCCCTCCTCTGGCTTTCTGATACAGAGGAAGGCAGAAGTCAAAGTtgtgtgtgtgtg tgtgtgtgtgtgGGGAATGGATGGAGGGAGAGCAAGTGTCTCTATAGATAAAGGGGTGTGCGTGTGGGAGA	411	2	y	3.3e-05	++ ++++++ +++
chr3:104818238-104818759	376	GCCCCCTCCCCCATTCCCTCCCTCCTCTGGCTTTCTGATACAGAGGAAGGCAGAAGTCAAAGTtgtgtgtgtgtg tgtgtgtgtgtgGGGAATGGATGGAGGGAGAGCAAGTGTCTCTATAGATAAAGGGGTGTGCGTGTGGGAGA	440	3	y	7.7e-10	+++++++++++++++
chr3:104818238-104818759	376	GCCCCCTCCCCCATTCCCTCCCTCCTCTGGCTTTCTGATACAGAGGAAGGCAGAAGTCAAAGTtgtgtgtgtgtg tgtgtgtgtgtgGGGAATGGATGGAGGGAGAGCAAGTGTCTCTATAGATAAAGGGGTGTGCGTGTGGGAGA	473	2	y	7.3e-05	+++++ ++++ ++
chr3:104818238-104818759	376	GCCCCCTCCCCCATTCCCTCCCTCCTCTGGCTTTCTGATACAGAGGAAGGCAGAAGTCAAAGTtgtgtgtgtgtg tgtgtgtgtgtgGGGAATGGATGGAGGGAGAGCAAGTGTCTCTATAGATAAAGGGGTGTGCGTGTGGGAGA	504	3	y	1.9e-05	+ +++++ +++++ +
chr12:80112921-80113298	76	GCCTTTCTGACTCTCCCGGGCTGCGGCGCGCAAAGCCCAATTTATAAGATTTGGTGGGTTGGGGGGGGTGGAAGG AGGAGCTTTAAACGTATTTAAATGAAGAAGAGGAGGCGGAAAAAAAGTTGATTGACACTGAGGTTGAATCAGCCA	139	2	y	3.1e-05	++ ++ ++ + +++
chr12:80112921-80113298	226	TGCGGTCAAGAGGGAGGGAGGGGTAAAGGGGGAGGAAAGAAACTTTCAAAAGGAAGAAGGGGGAGGGAGACGAGG	238	2	y	3.3e-05	+++++ ++ ++ +
chr12:80112921-80113298	226	TGCGGTCAAGAGGGAGGGAGGGGTAAAGGGGGAGGAAAGAAACTTTCAAAAGGAAGAAGGGGGAGGGAGACGAGG	277	2	y	8.5e-06	+++ + ++ ++ +++
chr12:80112921-80113298	301	AAAGAAGGCGGAAAAAAAAAAAAAAAAAAAGCACTCGGAGCGGCGCAAAACTTTTTTTTCTTAAAGAGGAAAAGT	312	1	n	3.7e-09	+++++++++++++++
chr7:128392376-128393082	1	AATCAGCTGTCCTTCCCCAGCCACTGAGGACAGGGTGCGCCCCTGGGCTGACCCAGTGGGTACAGGAGAATGAGT	11	2	n	6.1e-05	+++ ++ + +++ +
chr7:128392376-128393082	601	AAGGTGCAGTGTGGtctctctctctctctctctctctctctctctctcAGacacacacacacacacacacacTTA	615	2	n	1.9e-05	++ ++++ +++
chr7:128392376-128393082	601	AAGGTGCAGTGTGGtctctctctctctctctctctctctctctctctcAGacacacacacacacacacacacTTA	631	2	n	1.9e-05	++ ++++ +++
chr7:128392376-128393082	601	AAGGTGCAGTGTGGtctctctctctctctctctctctctctctctctcAGacacacacacacacacacacacTTA	652	3	n	7.7e-10	+++++++++++++++
chr2:127302045-127302240	151	TCTGAGGCATCCATTGTAGCTATTTTTTTTTTGTTTGTTTGTTTG	176	1	y	1.5e-08	+++++++++++++++
chr10:80374255-80374455	76	tcacacagatcatacacatactgaaaagcactcaggcatgtaaaaactcagaaatttgcctgcctctgcctccca	134	2	n	4.3e-10	+++++++++++++++
chr11:60417001-60417432	226	TGAGCTTGCTCCCGCCTCTCCAGCGCGCCCGCGCCAATTGGAAGCTGCAGAgtgtgtgtgtgtttgtgtgtgtgt	230	2	n	3.1e-05	+ +++ + +++++
chr11:60417001-60417432	226	TGAGCTTGCTCCCGCCTCTCCAGCGCGCCCGCGCCAATTGGAAGCTGCAGAgtgtgtgtgtgtttgtgtgtgtgt	285	3	y	9.7e-09	++++ ++++++++++
chr11:60417001-60417432	301	gagcgcgcgcgtgtgtgtgtgagcgcgtgtgtatgagtgagtgagtgtgtatgcgcgtgtgtgtgtgtgtgcgtg	307	3	y	2.3e-07	+ + +++++++++++
chr11:60417001-60417432	301	gagcgcgcgcgtgtgtgtgtgagcgcgtgtgtatgagtgagtgagtgtgtatgcgcgtgtgtgtgtgtgtgcgtg	357	3	y	7.7e-10	+++++++++++++++
chr11:60417001-60417432	376	cgtgcgtgtgtgtgtgtgtgtgtgtgtgtgtgtgtgtgtgtgtgtacccgcgaggg	381	3	y	7.7e-10	+++++++++++++++
chr11:60417001-60417432	376	cgtgcgtgtgtgtgtgtgtgtgtgtgtgtgtgtgtgtgtgtgtgtacccgcgaggg	397	3	y	7.7e-10	+++++++++++++++
chr11:60417001-60417432	376	cgtgcgtgtgtgtgtgtgtgtgtgtgtgtgtgtgtgtgtgtgtgtacccgcgaggg	413	3	y	3.2e-05	++++++++ + +
chr17:43016426-43017697	376	CTTTCGGAGCCTCCCCTGCTGCCTCCCTCTTCCGCCTGGGTGCCTGGCTGCTGCAGTGCACATGGGCTGCTGGAG	397	2	n	4.6e-06	+++ +++++ ++ ++
chr17:43016426-43017697	826	CTAGATCgtgtgtgtgtgtgtgtgtgtgtgtgtgtgtgtgtgtgtgtgtgtgGTGAGCTAAGGCTAGTGAGTGTT	833	3	y	7.7e-10	+++++++++++++++
chr17:43016426-43017697	826	CTAGATCgtgtgtgtgtgtgtgtgtgtgtgtgtgtgtgtgtgtgtgtgtgtgGTGAGCTAAGGCTAGTGAGTGTT	849	3	y	7.7e-10	+++++++++++++++
chr17:43016426-43017697	1201	TGCTTCCGCGCGCGAAGCTTTCCGGAGTAGGGCGCAGGCCACCCCTTGCTTCAGCTTCCTTGCTTCTCTCC	1245	2	n	2.2e-06	+ +++ ++ ++ +++
chr11:86995770-86995970	1	TGCTCTGAGGACCCCTGCAGGCCTGCTGTGTGATTGCAGGAGACTGGAAGAGGCCACAGAACCACAGGGCTGAAA	39	2	y	3.5e-05	++++ + + +++
chr11:86995770-86995970	76	AACAATAGAATCAGCCAGCCAGGaaaaaaaaaaaaaaaaaaaaGCCAGATCATGCCTTCTTCCAGCCAAAGGAGC	99	1	n	3.7e-09	+++++++++++++++
chrX:101332509-101333033	151	TGACTAGTTCCGCTTCCTTTCCCCGAGTCTTTTTGATGACTCATCCCTCTGTCTGCGCTGCGCAAAGTGGCCTTT	192	2	n	4.6e-05	+ + ++++++ ++ +
chrX:101332509-101333033	226	CCCGGCCCCGCCCCTGCTGCCCGCCACCCTCCGCCCCCGCCAAAGAGAAGGAGCTTCGGGAATTTTATCTGAAgg	232	2	n	2.9e-05	++ +++ ++++ ++
chrX:101332509-101333033	226	CCCGGCCCCGCCCCTGCTGCCCGCCACCCTCCGCCCCCGCCAAAGAGAAGGAGCTTCGGGAATTTTATCTGAAgg	249	2	n	1.7e-05	++ ++++ +++ ++
chrX:101332509-101333033	301	cgcgcgcgcgcccgcgcgccccccttctccgccccgccccccgccgccgccgccAGCgtgcgcgcgtgcgtgtgt gtgtgcgtgtgcctgtatgtgtgtgtgtgtgtgtgtgtgcctatgtgtgtgtgtgtgcctatgtgtgtgtgtgtg tgtgtgtgtACTTGAAGCTAAAACACTTATTTCCGCACAGGAAGGAGTCTCATTTCCATATAAGGAGCTTAACC	370	3	y	3.9e-09	+++++++++++ +++
chrX:101332509-101333033	301	cgcgcgcgcgcccgcgcgccccccttctccgccccgccccccgccgccgccgccAGCgtgcgcgcgtgcgtgtgt gtgtgcgtgtgcctgtatgtgtgtgtgtgtgtgtgtgtgcctatgtgtgtgtgtgtgcctatgtgtgtgtgtgtg tgtgtgtgtACTTGAAGCTAAAACACTTATTTCCGCACAGGAAGGAGTCTCATTTCCATATAAGGAGCTTAACC	394	3	y	7.7e-10	+++++++++++++++
chrX:101332509-101333033	301	cgcgcgcgcgcccgcgcgccccccttctccgccccgccccccgccgccgccgccAGCgtgcgcgcgtgcgtgtgt gtgtgcgtgtgcctgtatgtgtgtgtgtgtgtgtgtgtgcctatgtgtgtgtgtgtgcctatgtgtgtgtgtgtg tgtgtgtgtACTTGAAGCTAAAACACTTATTTCCGCACAGGAAGGAGTCTCATTTCCATATAAGGAGCTTAACC	418	3	y	4.9e-09	++++++++++++++
chrX:101332509-101333033	301	cgcgcgcgcgcccgcgcgccccccttctccgccccgccccccgccgccgccgccAGCgtgcgcgcgtgcgtgtgt gtgtgcgtgtgcctgtatgtgtgtgtgtgtgtgtgtgtgcctatgtgtgtgtgtgtgcctatgtgtgtgtgtgtg tgtgtgtgtACTTGAAGCTAAAACACTTATTTCCGCACAGGAAGGAGTCTCATTTCCATATAAGGAGCTTAACC	438	3	y	7.7e-10	+++++++++++++++
chr7:13054305-13054923	151	CCCCCACCCCAGCCTCCGTTTCTACCCTTCTTCCCGTCCCTAGGGGATTGCGCTGGTTGCAATAATCAGCTCGCA	153	2	n	7.8e-06	++ ++ + ++++++
chr7:13054305-13054923	301	GGGGGGCAACGGATTCAAGCACCACCTTCCAGACTGCGCATGCCCCCACCACttttttttttttttttttttttt	353	1	y	3.7e-09	+++++++++++++++
chr5:125273760-125273938	1	AGACTTTTGGGGCTTTGGGGCCTCCGCACAGCACAGACCTCTCTTacacacacacacacacacacacacaaacat acacacacCGGTCGGGGAACCTTTCCACATTGGTTCCCAGAAGGCTGCAGATTGAGCAACCAGCTTTTGCAAGCG	47	3	n	7.7e-10	+++++++++++++++
chr5:125273760-125273938	1	AGACTTTTGGGGCTTTGGGGCCTCCGCACAGCACAGACCTCTCTTacacacacacacacacacacacacaaacat acacacacCGGTCGGGGAACCTTTCCACATTGGTTCCCAGAAGGCTGCAGATTGAGCAACCAGCTTTTGCAAGCG	69	3	n	7.7e-08	++ +++ ++++++++
chr1:133039590-133039795	1	ACTAGAGGGCAGGCTAAACTCACAAATTCTGCACATGGAGCATCTAGTTCTCTGGGGCTGCTGTTGTTTTAttta ttttatttttgaatgtatgtgtatgcgtgcctgtctgtcttgtcactgtgtgatgaacacgcctgtggcggccag	64	1	y	9.4e-07	++ ++++ +++ +++
chr1:133039590-133039795	1	ACTAGAGGGCAGGCTAAACTCACAAATTCTGCACATGGAGCATCTAGTTCTCTGGGGCTGCTGTTGTTTTAttta ttttatttttgaatgtatgtgtatgcgtgcctgtctgtcttgtcactgtgtgatgaacacgcctgtggcggccag	90	3	y	2.5e-07	++ +++++ ++ +++
chr3:131303147-131303400	226	GTtttgtttgtttgtttgtttgtttgtt	228	1	y	4e-08	+++ +++++++++++
chr9:15279700-15280153	1	CAGGTACGTCTCGGTGCCATCAAGGCCCACCTCCTGCACCTGCTTCTCGCAGGCCGACTCGATGCTGATGCGCAC	33	2	n	2.1e-05	+++++ ++++ ++
chr9:15279700-15280153	76	GGCTCGCACGCCCGACATGCTGGCGGCGGCCTGAGGGCGACTCGCCGGAGACTCAGAGTACAGCACCGACACGGA AGGCTGGAACAAGCTTCCCGCAAGCCCGACGCGGCGGCCGGGAGGAAGCAAACTACCCACTGCTGCCCCACAATC	149	2	y	6.5e-05	+ ++++ + ++ +
chr9:15279700-15280153	376	TACGCTGGGCGTTGTAgtttgtttgtttgtttgtttgtttgtttaattggttgcttgGTTTTTGAAATAGCTTTC	393	1	y	4e-08	+++ +++++++++++
chr9:15279700-15280153	376	TACGCTGGGCGTTGTAgtttgtttgtttgtttgtttgtttgtttaattggttgcttgGTTTTTGAAATAGCTTTC	409	1	y	1.9e-06	+++ +++++++ ++
chr9:22468158-22468571	1	ccggcggctcccgcggccgccgAGACCCGGCCCCGGACGACATCGCGACCCGAGGCGGGCTTAGAAGGTGGAAAG TCGCCTCTTCCTCCCCGCAGCGCAACCCCACCAACGTCCCACCGGCCCGTGCCGCAGAACGCCGACAGGGAACGT	75	2	n	6.5e-05	++++++ +++++
chr9:22468158-22468571	301	TTCtattttttttttttttttatattatGAAGGTTTTAAGTATTTGTGGGTgggcaaggtgtcaaaggtctttaa	306	1	y	3.7e-09	+++++++++++++++
chr9:22468158-22468571	376	tatcagcacgcaggaggcagaaacactgacctgtgagt	388	2	y	5e-05	+++++++++ ++
chr1:131555310-131555512	76	AGTTACGTATTGAGTTCTATTCTTgtgcgtgcgtgcgtgcgtgcgtgcgtgcgtgcgtgcgtctgtctgtctgtc	100	3	y	1.9e-07	+++ +++ +++ +++
chr1:131555310-131555512	76	AGTTACGTATTGAGTTCTATTCTTgtgcgtgcgtgcgtgcgtgcgtgcgtgcgtgcgtgcgtctgtctgtctgtc	116	3	y	1.9e-07	+++ +++ +++ +++
chr1:131555310-131555512	151	tgtctgtctgcctgcctgcctgcctctgtctgtctgtgtgtctctctatata	169	2	n	9.2e-07	++++++++++ ++
chr12:108894127-108894463	151	TGGCCGGACCGTTGTAGGGGTGGACCAAGAGCTTCCGTGTGTGTGTGTGTGTGGTGAGCGGCGGGCCCGGGAGGG	187	3	y	7.7e-10	+++++++++++++++
chr12:108894127-108894463	226	AGGGGGCCGGGATGTGGCGGCCGCATGCTTCTCGCTTCTTAGCGCCGGGCTCAGCTCGCCGCTTGCCTTCCTGTT CTTCCCGTTCATTCCTAGAGTGCTGTGCTCTGAACT	291	2	n	4.3e-05	+++ +++ + + +++
chr6:17743491-17743691	1	TGCAGAGCCGCAGCTGAGTTTCTGCTGAGTTGAGATAAGCAGTtgtgtgtgtgtgtgtgtgtgtgtgCACACGCG CACGTTCCCAAGGCAGGCTTCACTAGGCCTGCTGCCTATTCTGGGAGCTGCTTGGTGCTATGGCTGATAGAGTTG	45	3	y	7.7e-10	+++++++++++++++
chr6:17743491-17743691	1	TGCAGAGCCGCAGCTGAGTTTCTGCTGAGTTGAGATAAGCAGTtgtgtgtgtgtgtgtgtgtgtgtgCACACGCG CACGTTCCCAAGGCAGGCTTCACTAGGCCTGCTGCCTATTCTGGGAGCTGCTTGGTGCTATGGCTGATAGAGTTG	64	3	n	4.6e-05	+++++ + +++
chr19:6858238-6858365	1	CAGACCCTGTACAGCTTCCTTCTTCCGGGGTTCTGCAGGGCTGCGAATCGTGTCTCAGCACATACACGCAAACAC ACACACACATCTTCCCTGGGTCTCAGATAAGGTAAGACTAGCTACAAAGCTG	69	3	n	2.2e-08	++ ++++++++++++
chr16:34050298-34050494	151	CACcacacacacacacacacacacacacacacgcacacgcacacgc	154	3	n	7.7e-10	+++++++++++++++
chr16:34050298-34050494	151	CACcacacacacacacacacacacacacacacgcacacgcacacgc	174	3	n	7.4e-09	+++++++++ +++++
chr7:75782060-75782383	1	CACGCACTGCAAGTCCCTGCCGCCGCCGCCGCCGCTGACGCAGTGCTGCCGCCAAAAAGCCAATTTCTCCCCAAT	16	2	n	5.3e-05	++++++ + +++ ++
chr7:75782060-75782383	151	CCCATACTACAGCTGCATTTGGAGGAAGGGGTGGGCTGCCCCAGCCTCTGGTCCAGCGAGGGGCCGGGAGGGGAA	185	2	n	6.2e-06	+++++ + +++++
chr7:75782060-75782383	226	AGAAAAGTTAGTGCCACCTGATTCTTTTTTTGtttgtttgttttcgagacagggtttctctgtatagccctggct	250	1	y	1.5e-08	+++++++++++++++
chr1:143731063-143731252	76	acataCTTGCATGGACATGTATGCACACGCCCCCCCCCCCCTCcacacacaaatgcacacacacacacatatatg	131	3	n	4.9e-09	++++++++++++++
chr3:89227528-89228465	301	CTGCCCTTCAGAACACCTTTCGTTTCTCCCTAAACACACACACAAACACACGGGTTTGCCTTGTTTCGAGTGCTT	335	3	n	9.7e-09	++++++++++ ++++
chr7:25395675-25396197	76	GTGGGGCTGAAGGTCTTGGCCCGCCCATCTGCTCAGATTAAAGGAACCGCGCAGTGCACCGTAACGACaaacaaa aaaccaaaaaccaaaaaccaaaaaAAAACCCGCAGTCCTGGAAGCAGCGAGAAGTGCCCTCACAGCAGGAATAGT	144	1	n	2.3e-07	++++++++++ +++
chr7:25395675-25396197	76	GTGGGGCTGAAGGTCTTGGCCCGCCCATCTGCTCAGATTAAAGGAACCGCGCAGTGCACCGTAACGACaaacaaa aaaccaaaaaccaaaaaccaaaaaAAAACCCGCAGTCCTGGAAGCAGCGAGAAGTGCCCTCACAGCAGGAATAGT	164	1	n	7.3e-07	++++ +++++++++
chr7:25395675-25396197	376	ACCCAAGGCGTGGGCGGGGACCGACTTGGGGGCGTAGCCGCGCTTGGTAGCCGTTTGGAGAAGCCCCGCCTTTTC CTCCGCCCCCTCACGTGGTCGTCCCTGttttttttttttttttttttttttttttcccccccagacagggtc	440	2	n	3.9e-06	++ ++++ + +++++
chr7:25395675-25396197	376	ACCCAAGGCGTGGGCGGGGACCGACTTGGGGGCGTAGCCGCGCTTGGTAGCCGTTTGGAGAAGCCCCGCCTTTTC CTCCGCCCCCTCACGTGGTCGTCCCTGttttttttttttttttttttttttttttcccccccagacagggtc	478	1	y	3.7e-09	+++++++++++++++
chr1:63114285-63114890	1	CTGCCTACGCGGCCCAGCCCGCCGCCCTACGGGAGCCCGGGGATGTGGGCCGGGCCTGGGGCCGCCTCTGCTTAC	61	2	n	6.1e-05	+ ++++++++ + +
chr1:63114285-63114890	76	CTTTCAGCTGCttttttttttttttttttttttaatttttttttCCTCCTTCCTCCCCCTCAACCCCCCCTCCCT	87	1	y	3.7e-09	+++++++++++++++
chr1:63114285-63114890	76	CTTTCAGCTGCttttttttttttttttttttttaatttttttttCCTCCTTCCTCCCCCTCAACCCCCCCTCCCT	102	1	y	1.1e-06	+++++++ ++++++
chr1:63114285-63114890	76	CTTTCAGCTGCttttttttttttttttttttttaatttttttttCCTCCTTCCTCCCCCTCAACCCCCCCTCCCT	123	2	n	2.7e-05	+++ ++++ ++++
chr1:63114285-63114890	451	CTCCGAAACGACAACTTTCCTACCATCTTGGAGGCAGAGGAGAGAGGGGCCAAGGGGAGAAGTGCACCGGCTCCA	480	2	y	3.1e-06	+++++++++++ +
chr8:57801446-57801623	76	cctgagagtgtgatgtgtgtgtgtgcattcatgtgcatgcctgtgtgtgtgtgtgtgtgtgtgtgtacatgtgtg	88	3	y	8.4e-07	++++++++++++
chr8:57801446-57801623	76	cctgagagtgtgatgtgtgtgtgtgcattcatgtgcatgcctgtgtgtgtgtgtgtgtgtgtgtgtacatgtgtg	118	3	y	7.7e-10	+++++++++++++++
chr8:57801446-57801623	76	cctgagagtgtgatgtgtgtgtgtgcattcatgtgcatgcctgtgtgtgtgtgtgtgtgtgtgtgtacatgtgtg	136	3	y	1.2e-07	++++++ ++++++
chr7:58399163-58399419	76	CGCAGGGCGGGGCGCTAGAGACGGAAGCAGCTTTGAATGATTCAACAGACTTAAACTAGAAGTTGTTTTCGTCAG	92	2	y	4.3e-05	+++ + ++ ++++
chr7:58399163-58399419	226	GCAGCTTTTTTTTTTTTTTTCTTGTGACGTG	231	1	y	3.7e-09	+++++++++++++++
chr10:93160562-93160804	76	CCACCGCCGGCAGGGGTCGCGCTGCCCCAGGCGAGCCGTGCAGGCGGGGGTGGGGAAGCTCCCGCAGCCGGTCGC TTTTCTCCGCCGCCGCTGGTTGGATCGTTTCAATAAAAGTCttttttttttttttttccttttttcttttctttt tttttttctAACCCCCG	150	2	n	8.9e-05	+ + +++ +++ ++
chr10:93160562-93160804	76	CCACCGCCGGCAGGGGTCGCGCTGCCCCAGGCGAGCCGTGCAGGCGGGGGTGGGGAAGCTCCCGCAGCCGGTCGC TTTTCTCCGCCGCCGCTGGTTGGATCGTTTCAATAAAAGTCttttttttttttttttccttttttcttttctttt tttttttctAACCCCCG	192	1	y	3.7e-09	+++++++++++++++
chr10:93160562-93160804	76	CCACCGCCGGCAGGGGTCGCGCTGCCCCAGGCGAGCCGTGCAGGCGGGGGTGGGGAAGCTCCCGCAGCCGGTCGC TTTTCTCCGCCGCCGCTGGTTGGATCGTTTCAATAAAAGTCttttttttttttttttccttttttcttttctttt tttttttctAACCCCCG	217	1	y	1.6e-07	++++ ++++++++++
chr11:95413767-95414893	76	GCGACCCCCTCCGAGTTCCCGCCTCTTTCCACTCTGGCTCCGCCTTCCGCCCAAATTCCCGGGCCCTGGCACCAC	108	2	n	1.4e-05	+++ +++ ++++ +
chr11:95413767-95414893	376	tgtgtatgtgtgtgtgtgtgtgtgtgtatgtgtgtgtgtgtgtgtgtgtgtggtgtgtgtgtgtgtggtgtgtgt gtgtgtgtggtgtgtgtgtgtgtatgtgtgtatgtgtgtgtgtgtatgtgtgtgtatgtgtttgtatgtgtgtgC	383	3	y	7.7e-10	+++++++++++++++
chr11:95413767-95414893	376	tgtgtatgtgtgtgtgtgtgtgtgtgtatgtgtgtgtgtgtgtgtgtgtgtggtgtgtgtgtgtgtggtgtgtgt gtgtgtgtggtgtgtgtgtgtgtatgtgtgtatgtgtgtgtgtgtatgtgtgtgtatgtgtttgtatgtgtgtgC	405	3	y	7.7e-10	+++++++++++++++
chr11:95413767-95414893	376	tgtgtatgtgtgtgtgtgtgtgtgtgtatgtgtgtgtgtgtgtgtgtgtgtggtgtgtgtgtgtgtggtgtgtgt gtgtgtgtggtgtgtgtgtgtgtatgtgtgtatgtgtgtgtgtgtatgtgtgtgtatgtgtttgtatgtgtgtgC	428	3	y	7.7e-10	+++++++++++++++
chr11:95413767-95414893	376	tgtgtatgtgtgtgtgtgtgtgtgtgtatgtgtgtgtgtgtgtgtgtgtgtggtgtgtgtgtgtgtggtgtgtgt gtgtgtgtggtgtgtgtgtgtgtatgtgtgtatgtgtgtgtgtgtatgtgtgtgtatgtgtttgtatgtgtgtgC	443	3	y	7.7e-10	+++++++++++++++
chr11:95413767-95414893	376	tgtgtatgtgtgtgtgtgtgtgtgtgtatgtgtgtgtgtgtgtgtgtgtgtggtgtgtgtgtgtgtggtgtgtgt gtgtgtgtggtgtgtgtgtgtgtatgtgtgtatgtgtgtgtgtgtatgtgtgtgtatgtgtttgtatgtgtgtgC	466	3	y	1.7e-09	++++++++ ++++++
chr11:95413767-95414893	376	tgtgtatgtgtgtgtgtgtgtgtgtgtatgtgtgtgtgtgtgtgtgtgtgtggtgtgtgtgtgtgtggtgtgtgt gtgtgtgtggtgtgtgtgtgtgtatgtgtgtatgtgtgtgtgtgtatgtgtgtgtatgtgtttgtatgtgtgtgC	488	3	y	1.7e-09	++++++++ ++++++
chr11:95413767-95414893	376	tgtgtatgtgtgtgtgtgtgtgtgtgtatgtgtgtgtgtgtgtgtgtgtgtggtgtgtgtgtgtgtggtgtgtgt gtgtgtgtggtgtgtgtgtgtgtatgtgtgtatgtgtgtgtgtgtatgtgtgtgtatgtgtttgtatgtgtgtgC	508	3	y	4.4e-08	++++ +++ ++++++
chr11:95413767-95414893	526	GCGCTCCAAGAGTGTATTTGTGTATCGGCGGTCCCGCAGGTCCCGGATGTTGCGGGCAGTATGAGGCGAGCGCAG	535	3	y	2.9e-05	+ ++++ + +++++
chr11:95413767-95414893	601	GGGGACAGGGACCAGCAGCTGTCGCCGCCGTTCTCAGGTGAGTGTGTGTATGTGTGTGTCAAGAGTCGAAGAAGG	642	3	y	1.7e-09	++++++++ ++++++
chr11:95413767-95414893	826	TTCCTACCTCAAGCATTCTGGAAACACAAACGCGCCCCCTGCCTCCTGCCTCCCTCACCATCATATCCCCAACCC	870	2	n	1.9e-05	++++++++ + ++
chr2:158174695-158175753	301	CCAATTCTGTAGCGCGCGCGCGCGCGcacacacacacacacacacacacacTGTGCATCCATCCAACCAGCGGTC	327	3	n	7.7e-10	+++++++++++++++
chr2:158174695-158175753	901	GAGGGCCCCTGCTTATCTGCCTGGGTTGCAAAACCTCTGCCCAGTTCCTGAAACACCAGCATCTCCCTCAGGCTC CTCTGAGGCCGATGTCATCCCCTATGCTTGGGAAATGTCAACTATGGGGCATGCTGACCCAGGGTCAAGGCTTTC	962	2	n	4.6e-06	++ ++++ + ++++
chr4:130913231-130914310	226	TGTTTGgtgtgtgtgtgtgtgtgtgtgtgtgtgtgtgtgtgtgtgtgtgcgtgAGGACACACTGAGACCTTCCAA	232	3	y	7.7e-10	+++++++++++++++
chr4:130913231-130914310	226	TGTTTGgtgtgtgtgtgtgtgtgtgtgtgtgtgtgtgtgtgtgtgtgtgcgtgAGGACACACTGAGACCTTCCAA	248	3	y	7.7e-10	+++++++++++++++
chr4:130913231-130914310	226	TGTTTGgtgtgtgtgtgtgtgtgtgtgtgtgtgtgtgtgtgtgtgtgtgcgtgAGGACACACTGAGACCTTCCAA	264	3	y	3.9e-09	+++++++++++ +++
chr4:130913231-130914310	376	ctgtggagttgaacagaatagtgccCTTTTGGTTGTGGCTGTGCAAAGAGAAAGGCAGGCTGGCAACGGGGAGGA	420	2	y	1.3e-05	++ + +++++++
chr4:130913231-130914310	601	GCTGCCACCTTCTCCCTTCAAGGATGGCTTAAGCTTTGTGGCTGGGGAACTGCTTGGGGGTGGTGGGGGGCAGCC	605	2	n	6.5e-05	++ + +++ +++ +
chr4:130913231-130914310	751	TTTGGAGTGGCCTAAAGTTGGAGTCTCTGTTCTCTTCTGCTGGGATTTACCCCTCACCCCCTGCCCCTGGCCACA	810	2	n	6.5e-05	++++++ +++ + +
chr4:130913231-130914310	976	ACAGGCCGTGTGGCACCAGGCAGTGGTACAAACCAGTTCTGTCCTGAAGCTCTTGTGTGCACCTCCCTGCCCCCC TCCCCCATTCCCAGCCTTTgctgtgcagt	1041	2	n	3.8e-05	++++++ + + ++
chr10:127563974-127564541	151	GGGGCCAGACTGGAAAGCTTCCTGCTTGCAGAGGCCTTGAACTGGAATTTTTTGGGGGGAGGGGGAGCATGGGGT GGtcgagacagggtttctctgtgtggccctggctgtcctgaactcactctgtagaccaggctggcctcaaactta	223	2	y	1.4e-05	++ ++ +++ ++++
chr10:127563974-127564541	301	gaaatacacctgcctctgcctcccaagtgctgggattgaaggcgtgcgccatcacgctgggctGAGCTGGAATGT	309	2	n	4.3e-10	+++++++++++++++
chr10:4432261-4432673	1	TGACCTGTGCGCGGAGAGGACGACCGCGACGCCCACGCGCACGCTCCCGCCGCAGGAACCTCTGCGGAAACACAC	30	3	n	4e-05	+ + +++ + +++ +
chr10:4432261-4432673	301	GCGCTTaaaaaaaaaaaaaaaaaaaaaaaaaGCTCCAACGCTTCCTTTCTGGAACCGCGGCCGTTGAACCCCGGG	307	1	n	3.7e-09	+++++++++++++++
chr4:117210517-117210752	1	TGGTGGTCAGCCCACGCTTTACAGCGAGTGTGTGTGTGTGTGTGGGGGGGGGTGGGGATGAAATAACTAAGGCAT	28	3	y	7.7e-10	+++++++++++++++
chr11:69605825-69606168	1	AAGGCTCCTCCGACAAACGGCGACAGCCACACCACAGTTGGCCCAGCCAGTGGGAGCTGGGGCGGGGACAAGCAG	52	2	y	3.1e-05	++ ++ + +++ ++
chr11:69605825-69606168	226	TTCGTTGCTCGCTCAGGAGACCTCATACATATGCAAATGAAGATGGATTGGACCCGCCCCCTGGCGCCttttttt tttttttttttttttttttttttGGTCCTAGCGGGTTCTTCCT	294	1	y	3.7e-09	+++++++++++++++
chr11:69605825-69606168	226	TTCGTTGCTCGCTCAGGAGACCTCATACATATGCAAATGAAGATGGATTGGACCCGCCCCCTGGCGCCttttttt tttttttttttttttttttttttGGTCCTAGCGGGTTCTTCCT	309	1	y	3.7e-09	+++++++++++++++
chr19:4397026-4397609	1	AGGAGGATCCGCTGAAGCAGCCGCCGCCATTTTGAACCCGTCAGATTCTCACATACACACAGCTCCTCCGGCCTC	48	3	n	9.3e-05	+ ++++ +++++++
chr19:4397026-4397609	76	ACTGCGCAGGCGCCCTCTCTTCACCACCACCCCCTCCCTCCCGTCGCCTCTCCACCCCCACCTCTTTCGAGCCTC	102	2	n	1.7e-05	++ ++ ++ +++++
chr19:4397026-4397609	451	TCTCTCTCCCCcacacccgcacacagacacacacgcacacacagacgcgcgcgcgcgcgcacacacacacacaca	478	3	n	2.3e-09	+++++++ +++++++
chr19:4397026-4397609	451	TCTCTCTCCCCcacacccgcacacagacacacacgcacacacagacgcgcgcgcgcgcgcacacacacacacaca	510	3	n	7.7e-10	+++++++++++++++
chr7:127228789-127229231	76	cttTTGTTTTTTTTAGTTTTGGGttttgtttttggagacagggtttctctctgtagccctggctggcatggaact	79	1	y	2.1e-06	++ ++++++++ ++
chr7:127228789-127229231	76	cttTTGTTTTTTTTAGTTTTGGGttttgtttttggagacagggtttctctctgtagccctggctggcatggaact	94	1	y	5.4e-06	++ ++++ +++++
chr7:127228789-127229231	151	ccttctatggccttggactaagagctccacctgcctctgtcttctgagattaagggcatgtaccactactgtcTA	180	2	n	4.6e-08	++++++++++ ++ +
chr8:70797052-70797667	1	AGGGCGGGGCTACGGGTTACGGGGCGTGTCCAGGAGCGGGACAGACGGTGGACCGAGGGGCAGGACTATAGGCAG	50	2	y	9.4e-05	+++ ++ ++++++
chr8:70797052-70797667	376	TGGAAGCAACTTGCAGGACCCCAGTCGCGCGGGGGTGAGGTGGTGGGCGGGGCCTCTGAgtgtgtgtgtgtgtgt	435	3	y	7.7e-10	+++++++++++++++
chr8:70797052-70797667	451	gtgtgtgtgtgtgGACTCTGGCTCTTGGGCCTGTCTGTGGGCGGTACCGCTTAAGAACTGTGGTGGAGGGCAGGG ACAGAGGCGGAGCCTCGCGCGGTGGGGCGGGGCTGAGCGCCCAGCTCTGGAGAGCGTGCGCGCTCGGAAAAGAGA	451	3	y	3.5e-06	+++++++++++++
chr8:70797052-70797667	451	gtgtgtgtgtgtgGACTCTGGCTCTTGGGCCTGTCTGTGGGCGGTACCGCTTAAGAACTGTGGTGGAGGGCAGGG ACAGAGGCGGAGCCTCGCGCGGTGGGGCGGGGCTGAGCGCCCAGCTCTGGAGAGCGTGCGCGCTCGGAAAAGAGA	516	2	y	1.5e-05	+ +++++ + +++
chr8:18595026-18595692	1	ACTGTTATCTACAGAAGAGCAGGCACTCCCTGGCTTCCGTCCTCCCTAGGCGGCTCCGTCCTCCTCCCTCTCCCG GCAGCCCTTGCGCGGGGAGGCGGGCCCGCGTCCGACCCGCCCCCTCGCAGACTCGCGGGCGGGAGGTTTGAAGAC	63	2	n	4.3e-05	+++ +++++ ++ +
chr8:18595026-18595692	151	CCAGAGGGCCCGCGGACGCTGCAGCAGTCCCGCTCGCGCTCCAGGGTGCAGGGCTGAGGCAGGGCCCACGGGTGG	199	2	y	1.3e-05	+++ ++++++++
chr8:18595026-18595692	376	GATCAGGTCTCGGCTGTCGTGTGTCACTGAGCCGGGCGCTCTCGGCGAGGGAAGGGAACCCGGAGCCCTTGCGCA CACACACACACACCCCTAAGCCTGACGCGGCGAGCCCAGGGGGCACGGCCTGCGCATGCGCACCCCTCTGCCTTC	449	3	n	7.7e-10	+++++++++++++++
chr8:18595026-18595692	376	GATCAGGTCTCGGCTGTCGTGTGTCACTGAGCCGGGCGCTCTCGGCGAGGGAAGGGAACCCGGAGCCCTTGCGCA CACACACACACACCCCTAAGCCTGACGCGGCGAGCCCAGGGGGCACGGCCTGCGCATGCGCACCCCTCTGCCTTC	511	2	n	4.1e-05	+ +++++++++ +
chr10:117215942-117216434	226	ATCACACCACCAAAATAAGCCTCTAGCTTCTGCTTTCAAAAGAGGAAACTGTCTAAATCTGAGGTCTAGCCCCAC	248	2	n	6.1e-05	+ ++ +++++ + +
chr10:117215942-117216434	376	GAGAAGACtgtgtgggtgctgtatgtatgtgtctgtgtgcacgtgtgtgtgcgtgtgtgtgcacatgtgcatgtg	400	3	y	1.5e-07	++ +++++ ++++++
chr10:117215942-117216434	376	GAGAAGACtgtgtgggtgctgtatgtatgtgtctgtgtgcacgtgtgtgtgcgtgtgtgtgcacatgtgcatgtg	420	3	y	2.3e-09	+++++++ +++++++
chr4:132463890-132464159	1	CAAACTCTCCCTTCAGCACTTCCGGTAGGAAGCTGAGGGACAGGAAACTTCTCCGCTACCGCCCCGAAAAGTAAG	28	2	y	3.5e-05	+++ ++ ++++ +
chr4:132463890-132464159	151	CTGTTGCTTTGGGGTCCTAGTCTAGAGTGGTACCGTGGAAGGTGACTGTCATAGGACAGCTCTAGGATACGtttt tttttttttttttttttttttCAGCTTCGACGACCTGGATGTTT	222	1	y	3.7e-09	+++++++++++++++
chr1:153414272-153415180	601	GTTCTGGAGCAGGGATGAGTTTGAGAGCGATAGGTTTTGTTTGTTTGTTTTATGACatttatttatttattcatt tatttatATAGCTCgggtctgtttatataaccctggctcttccggaacttgctatgtagtccaagctggccttga	636	1	y	4e-08	+++ +++++++++++
chr1:153414272-153415180	601	GTTCTGGAGCAGGGATGAGTTTGAGAGCGATAGGTTTTGTTTGTTTGTTTTATGACatttatttatttattcatt tatttatATAGCTCgggtctgtttatataaccctggctcttccggaacttgctatgtagtccaagctggccttga	662	1	y	2.1e-05	+++ +++ ++ +++
chr1:153414272-153415180	751	attcagagatccacctgactctgcctctcaagtgctgggattgatgagatgtcccactatgcctggcCTAAAATA	764	2	n	1.8e-07	++++ +++++++++
chr4:108459939-108460903	1	CCTCCCCTCAGCGGGTCCTCCTCTTTCTCTCGCTccctcctcctccccctccccgtcccttccccccCACAATGC	32	2	n	3.3e-05	++ ++++ +++++
chr4:108459939-108460903	1	CCTCCCCTCAGCGGGTCCTCCTCTTTCTCTCGCTccctcctcctccccctccccgtcccttccccccCACAATGC	52	2	n	7.8e-05	++ + + ++ ++ ++
chr4:108459939-108460903	151	cggcggcggcgacggcgacgggggcggcagcggcggcggGAGGCGGAGGGGGAGCCGGAGCCTCTGAGATGAGGA	189	2	y	6.7e-06	++++++ ++++ +
chr4:108459939-108460903	451	CAGGGGAAAGCCGAGGGAAGGAGGGAAGTCGAGAAGGCGGCCTGGGCGGCCTGAGGAGGGCTTTGGGGGGCCGAC	456	2	y	2.9e-05	+ + ++ ++++ + +
chr4:108459939-108460903	601	ATTGGTCTAGCCTTCGCTTAGATCCAGTGCGTGTTTGTCTGTATTGTGTGCCTTTCTTTCACCCTGTGTATGTGT ATGTATATATACACTTGTAAACACACACACACACAGCGTGTCCTCCCCGCCATCCCCCGGGCTTGTCCTTGTCGG	627	3	y	2.3e-05	+++ ++++ +++ ++
chr4:108459939-108460903	601	ATTGGTCTAGCCTTCGCTTAGATCCAGTGCGTGTTTGTCTGTATTGTGTGCCTTTCTTTCACCCTGTGTATGTGT ATGTATATATACACTTGTAAACACACACACACACAGCGTGTCCTCCCCGCCATCCCCCGGGCTTGTCCTTGTCGG	664	3	y	1.5e-06	+++++ +++++ ++
chr4:108459939-108460903	601	ATTGGTCTAGCCTTCGCTTAGATCCAGTGCGTGTTTGTCTGTATTGTGTGCCTTTCTTTCACCCTGTGTATGTGT ATGTATATATACACTTGTAAACACACACACACACAGCGTGTCCTCCCCGCCATCCCCCGGGCTTGTCCTTGTCGG	697	3	n	5.1e-08	++++++++++++++
chr4:108459939-108460903	751	GAGGGAGCAGAGGTAGGTTTGTGTGGATTTCGTTTCCTGCTCACCCGCCGTCTCTGTCCCCCGCCCCCCAGTCGA	753	2	y	7.2e-07	++ +++++++ +++
chr4:108459939-108460903	751	GAGGGAGCAGAGGTAGGTTTGTGTGGATTTCGTTTCCTGCTCACCCGCCGTCTCTGTCCCCCGCCCCCCAGTCGA	797	2	n	6.9e-05	+ + +++++ + ++
chr10:121033546-121034109	76	GTCAGAGTTTGCAGACAGGCACACAGAGATGCAGTCTGAAATGTAGTTCGAAGAGAAAGGGTGGGCTGGCTATGT	87	3	n	6.3e-05	++ +++ ++++++
chr10:121033546-121034109	151	GCTTTCCGTTAGCTCCACTGTTAAACGGAATTTATCTTTGACCACGAATCGAGCCCAGATTTTTTTGTTTGTTTG	210	1	y	1.5e-08	+++++++++++++++
chr10:121033546-121034109	526	GCCAGCTTTGCCAGCATCGTGTCTCTGCGTCCCCCTCT	543	2	n	1.5e-05	+ ++ ++++++ +++
chr16:8637314-8637855	226	AAGGGCGCATGCGCGGGCGGTTAAAAACCCGCATGCGCTAATTCAAAAAAAAAAAAAAAAATTACTATGGCTTGG	270	1	n	3.7e-09	+++++++++++++++
chr16:8637314-8637855	451	GACTGGAGAAATGGCCACTCTCTGTCTCTTCGACATGGATGGGACCCTGACTGCCCCGCGGCAGGTAGGCGGCGC	465	2	n	1.3e-05	++ +++++ +++
chr13:55429384-55429722	76	GGAACTGGTTTGTACCATAGAGGGCGTGGTTTTTttctttgtttttgcaagagggacttgatctagagtgaccta	105	1	y	6.1e-07	+++++++ +++++++
chr13:55429384-55429722	151	actttgctatttccctgcctccacctcctaattacgggaattacagaagtgtatttaccacAGCAAGCTAAGAGG	164	2	n	8.3e-08	++++++++ +++++
chr2:78868598-78869366	76	CGGGCTCAGGCCGGAAGCCAcccgcggccccgcgagaccgcgcccccgcccccgccTCCTCGTCCTCCTCTTCCA	120	2	n	2.9e-06	++ +++ + ++++++
chr2:78868598-78869366	226	GGCGGACGCGTGCGCATCTGcccccccgccccccagctccccaacctccgccaccccccgcccgccaccccccac	266	2	n	6.9e-05	++ ++++ +++ ++
chr2:78868598-78869366	301	ccGGCGGAAAAAAAAAAAAAAAGAAGGCGCAGCGGGAGCGCGCTCGCGCGGGGGCGCGCGGGAGCCGCTCGCGCC	308	1	n	3.7e-09	+++++++++++++++
chr2:78868598-78869366	676	TCGGCGGCGGCTTCTTTTCCCGCCCCCCCGGTGCCCCCCCCAGGCTGCCTCCATTTCCTCAAGGAAGGTTCCTCG	719	2	n	4.6e-05	+++++++ +++
chr7:30394546-30394828	1	acaagaggccagagaggaagtcacccagtacaaactgaagcGCGCGCGcacacacacacacacacacacacacac acacacacacacacacacacGATCACTATGGCTACCCACTTCCTCATCCTTCTGTGCTTCCACGCTGAGAGATAA	49	3	n	7.7e-10	+++++++++++++++
chr7:30394546-30394828	1	acaagaggccagagaggaagtcacccagtacaaactgaagcGCGCGCGcacacacacacacacacacacacacac acacacacacacacacacacGATCACTATGGCTACCCACTTCCTCATCCTTCTGTGCTTCCACGCTGAGAGATAA	65	3	n	7.7e-10	+++++++++++++++
chr7:30394546-30394828	1	acaagaggccagagaggaagtcacccagtacaaactgaagcGCGCGCGcacacacacacacacacacacacacac acacacacacacacacacacGATCACTATGGCTACCCACTTCCTCATCCTTCTGTGCTTCCACGCTGAGAGATAA	81	3	n	7.7e-10	+++++++++++++++
chr4:132514993-132515828	301	TGGGCAGAGGGGGTGAAGGGCGGAGGCagtcctagctttttaaaccgtgtgaaatcagaacaagtcatttctctc tgcccctgtttcctgctgtgtcaaagcagggctgttgtgagcacgaaagctaacgcaGAACTCTTCAACAGGGCA	316	2	y	5.7e-05	+++ +++++++
chr4:132514993-132515828	301	TGGGCAGAGGGGGTGAAGGGCGGAGGCagtcctagctttttaaaccgtgtgaaatcagaacaagtcatttctctc tgcccctgtttcctgctgtgtcaaagcagggctgttgtgagcacgaaagctaacgcaGAACTCTTCAACAGGGCA	374	2	n	2e-06	+++++ +++ +++
chr4:132514993-132515828	751	CTCAGCGCCTGCCTCTCCTCCGCCCGCCCTGAGCAGGAAGGGAGCTGGTAGCACAAGGCTTACTTTTTTTTTTtt ttttcttaat	758	2	n	2.1e-05	+++++++++ + +
chr4:132514993-132515828	751	CTCAGCGCCTGCCTCTCCTCCGCCCGCCCTGAGCAGGAAGGGAGCTGGTAGCACAAGGCTTACTTTTTTTTTTtt ttttcttaat	814	1	y	3.7e-09	+++++++++++++++
chr9:50616967-50617531	226	CCGacacaaacacacacacacacacacacCCATACCGTGCGCCGCAGCCTCGCGTGGCGGGGTGGGAGAAAAGGT	236	3	n	7.7e-10	+++++++++++++++
chr5:24393571-24394880	1	GGAACGGGTATGAGTCAGAGCCACTCCCACCAAGAAACCACAGCCCAGTGGAGGAGTTAAAACAAAAATAATAAT	60	1	n	5.4e-06	+++++++++ ++ ++
chr5:24393571-24394880	376	ACGATAACTGTGAGTAGCAGGATCACATAGGGAGATTAGAGACTCAAGTGGTGGCACGTTACGTGCATGTATGTT TTTGTTTGGTTTGGGTTGAGGGgtgtgtgtgtgtgtgtgtgtgtgtgtgtgtctgtgtgtAGTTTTTTTTTTTAA	443	1	y	1.9e-05	+ + + +++++++++
chr5:24393571-24394880	376	ACGATAACTGTGAGTAGCAGGATCACATAGGGAGATTAGAGACTCAAGTGGTGGCACGTTACGTGCATGTATGTT TTTGTTTGGTTTGGGTTGAGGGgtgtgtgtgtgtgtgtgtgtgtgtgtgtgtctgtgtgtAGTTTTTTTTTTTAA	473	3	y	7.7e-10	+++++++++++++++
chr5:24393571-24394880	376	ACGATAACTGTGAGTAGCAGGATCACATAGGGAGATTAGAGACTCAAGTGGTGGCACGTTACGTGCATGTATGTT TTTGTTTGGTTTGGGTTGAGGGgtgtgtgtgtgtgtgtgtgtgtgtgtgtgtctgtgtgtAGTTTTTTTTTTTAA	493	3	y	3.6e-08	++++++++++ ++++
chr5:24393571-24394880	376	ACGATAACTGTGAGTAGCAGGATCACATAGGGAGATTAGAGACTCAAGTGGTGGCACGTTACGTGCATGTATGTT TTTGTTTGGTTTGGGTTGAGGGgtgtgtgtgtgtgtgtgtgtgtgtgtgtgtctgtgtgtAGTTTTTTTTTTTAA	509	1	y	1.1e-05	+ +++++++++++
chr16:32202745-32203085	76	TTTCCTCCTGCAAGCTCCTCCCTGCGGATTACCCCTGGCACCCCAACCTACCCCATCCTCAAATGTGTTGCTGCT	122	2	n	9.4e-05	+++ ++ + ++++
chr16:32202745-32203085	151	GCCCCCTGCTGGATGAACCCTGTCAGACCCCCCACACACACACACACAACCCCTACTGGAAGGCCGCCATTTTCC	183	3	n	7.7e-10	+++++++++++++++
chr3:131474569-131474958	151	tcAACAGTCAGCGGCATCTGCGATGTGGCTTTCCTGCTCTGCCCTGCGCCCTGCGCCCTGCTTGTGACTCCCCTG	207	2	n	1.8e-05	+++++ + ++ ++++
chr3:131474569-131474958	301	CAGCCTCCACGCCACTCCTGTGTTGACAACCCTGTCCCTAAATCTGGGCTCTGAAAGCAAGTCtttttttttttt tttttttttttttt	364	1	y	3.7e-09	+++++++++++++++
chr18:73762456-73762670	1	TGGAGCTGGAGCTCTGTGGTGAACCATTTCCTTAGCACGCACGCACGCACGAGGCTCTGGGGCAACAGCTGGAGA	36	3	n	1.9e-07	+++ +++ +++ +++
chr18:73762456-73762670	76	GGAAGAGGAGCCAAGAGCCCTCCCGGAACTGCTTTCAGGATGAGGGAGGCAGAAGCATGCTTGCATCCTGGTGCT	120	2	y	7.2e-07	+++++++++ +++ +
chr18:73762456-73762670	151	AGCGAACTGCCCAGGGAGGACTGATGGCCAGAGAGGCAGCAGAGCCAGTGGCGCCAGGTTCTTA	185	2	y	9.4e-05	++ ++++++ +++
chr10:128549092-128549391	1	AAGATGGCGCTAAGACCGAGAGGGCGGAGAGGGAGGCCTACTGCTATTTAATGGCGTGCTCGGTGTCGTCACTTC	22	2	y	2.5e-05	++ + +++++ +++
chr10:128549092-128549391	226	GGACTGAGAAAAAATAGGCGGGGAAAAAAAAAAAAAAACCACTCCGTCTTCTCCCTCGTTGCTTCATGGGAGTT	249	1	n	3.7e-09	+++++++++++++++
chrX:142681123-142681860	76	ACgtgtgtatgtgtgtgtgtgtgtgtgtgtatgtgtgtgtgtagggagggagtgaagtggatcggaggagtgtgt gtgtgtgtgtgtgtgtgtagggagggggtgaagtggacgggaggagggccgaaggtggagggagttggcgacgag ggggtggagagagggaggggaaaccggaggaagcgagcggcggctgccgggggaggaaggcaaggaggaggagcc	86	3	y	7.7e-10	+++++++++++++++
chrX:142681123-142681860	76	ACgtgtgtatgtgtgtgtgtgtgtgtgtgtatgtgtgtgtgtagggagggagtgaagtggatcggaggagtgtgt gtgtgtgtgtgtgtgtgtagggagggggtgaagtggacgggaggagggccgaaggtggagggagttggcgacgag ggggtggagagagggaggggaaaccggaggaagcgagcggcggctgccgggggaggaaggcaaggaggaggagcc	102	3	y	3.3e-09	++++ ++++++++++
chrX:142681123-142681860	76	ACgtgtgtatgtgtgtgtgtgtgtgtgtgtatgtgtgtgtgtagggagggagtgaagtggatcggaggagtgtgt gtgtgtgtgtgtgtgtgtagggagggggtgaagtggacgggaggagggccgaaggtggagggagttggcgacgag ggggtggagagagggaggggaaaccggaggaagcgagcggcggctgccgggggaggaaggcaaggaggaggagcc	145	3	y	7.7e-10	+++++++++++++++
chrX:142681123-142681860	76	ACgtgtgtatgtgtgtgtgtgtgtgtgtgtatgtgtgtgtgtagggagggagtgaagtggatcggaggagtgtgt gtgtgtgtgtgtgtgtgtagggagggggtgaagtggacgggaggagggccgaaggtggagggagttggcgacgag ggggtggagagagggaggggaaaccggaggaagcgagcggcggctgccgggggaggaaggcaaggaggaggagcc	201	2	y	6.5e-05	+ +++ ++++ ++
chrX:142681123-142681860	76	ACgtgtgtatgtgtgtgtgtgtgtgtgtgtatgtgtgtgtgtagggagggagtgaagtggatcggaggagtgtgt gtgtgtgtgtgtgtgtgtagggagggggtgaagtggacgggaggagggccgaaggtggagggagttggcgacgag ggggtggagagagggaggggaaaccggaggaagcgagcggcggctgccgggggaggaaggcaaggaggaggagcc	225	2	y	1.7e-05	++ ++ +++ +++
chrX:142681123-142681860	526	GTGGCGGCCCCATGGCCCGGCCCCTGGCTGGCCCCGCGTCCCCGCCCTCCCTCTCGGCTTCCTCCCGCCGCCCGC	573	2	n	8.3e-05	+ +++ ++ +++
chrX:142681123-142681860	601	CTGCGCCTGGGGGGCTGGTCCGGAGCAGGCGGAGGGCTGAGGGTGGCGCTGGCCCGGAGGGCGGGCGTGAGGGGC	632	2	y	3.5e-05	+ +++ ++++ ++
chr13:41381612-41382170	1	TGTCCTGTATCAAGAATTGGAAGGGAAGTGGTTTTGTGGCttcttttgtccttccttcctttttttttttttttt	60	1	y	3.7e-09	+++++++++++++++
chr13:41381612-41382170	76	tccttttcATCGAATTTTCACATCACTTGAAGATTTTATTTTCTTTTTCCTCTGTGACCTGTTTCAGAGGGCATT	109	1	y	3e-06	++++ ++++ +++++
chr13:41381612-41382170	226	TGAGTTGGTGACTGTGTGGGGATATTTCTGTCTGGGAGGAGGTTGGGGGAGAGAAGCAAGGCCAGTAGATGCCAC	263	2	y	9.2e-06	+++++ + ++ ++
chr6:83054397-83054868	151	CCGTCAGGACGCGCTCCTCTCCAGcatacgcacacgctcacacacaaacacacacacatacacacacaTTCCCCG	181	3	n	4e-06	+++++ + +++++++
chr6:83054397-83054868	151	CCGTCAGGACGCGCTCCTCTCCAGcatacgcacacgctcacacacaaacacacacacatacacacacaTTCCCCG	203	3	n	1.7e-09	++++++ ++++++++
chr11:82890580-82890829	151	GCGCCAGCCACCTGCAAGCACACCTAGAGCTTacatacatgcacagagacacaagcacacacaccgacacacaca cacacacacacacacacacacaca	218	3	n	7.7e-10	+++++++++++++++
chr11:82890580-82890829	151	GCGCCAGCCACCTGCAAGCACACCTAGAGCTTacatacatgcacagagacacaagcacacacaccgacacacaca cacacacacacacacacacacaca	234	3	n	7.7e-10	+++++++++++++++
chr6:47739863-47740057	1	AGGAGCGGAGGGTGAaaaaaatgtgtaccccggctggcctcgaactcgtgatcctcctgcctctgcctccttcag	56	2	n	4.3e-10	+++++++++++++++
chr11:5485388-5485628	151	TGTGGGACACTTaaaaaaaaaaaaaaaaaaaaaaaaaCAACCCCCCCCCAaaaaaaacaaaaaacgaacaaacaa acaaaaaaaACACAA	163	1	n	3.7e-09	+++++++++++++++
chr11:5485388-5485628	151	TGTGGGACACTTaaaaaaaaaaaaaaaaaaaaaaaaaCAACCCCCCCCCAaaaaaaacaaaaaacgaacaaacaa acaaaaaaaACACAA	200	1	n	6.1e-07	++++++++ ++++++
chr11:5485388-5485628	151	TGTGGGACACTTaaaaaaaaaaaaaaaaaaaaaaaaaCAACCCCCCCCCAaaaaaaacaaaaaacgaacaaacaa acaaaaaaaACACAA	220	1	n	1.5e-08	+++++++++++++++
chr11:69948212-69949209	301	ATGACATAGAGCCCGCgtgtgtgtgtgtgtgtgtgtgtgtgtatgtgtgtatgCCCCGAAGTAACCCGGAGTGGC	317	3	y	7.7e-10	+++++++++++++++
chr11:69948212-69949209	301	ATGACATAGAGCCCGCgtgtgtgtgtgtgtgtgtgtgtgtgtatgtgtgtatgCCCCGAAGTAACCCGGAGTGGC	335	3	y	1.7e-09	++++++++ ++++++
chr11:69948212-69949209	826	CTCAATTCAGAAAAAGGCCCAAGAGAAGTGCAAGGCTTCTGGCGCCACCTAGAGGGAGAGCGAGGAACCTTAGTG	876	2	y	9.2e-06	++++ ++++ +++
chr6:118139060-118139446	226	GGCCAGGCCTTTCTCTTTCCAGCTAGGACACGCCTATTCCTCCCTCTTCTGTCCTGTGCCCTGCACAGAAAGCTC	258	2	n	7.3e-05	+++ ++ ++++
chr6:118139060-118139446	301	CACAGATGACAGTTGATTCATCTAAAAACAAACAAACAAACAACAACTGAGATGGGTGCTCAAGCCCTGTGGGAT	326	1	n	4e-08	+++++++++++ +++
chr11:4096597-4096992	226	GTTAGGACTTCGGAGAACGTTGTCGCGAGAGGAGAGGAAAGGGACGTTACTGTCTCTCTGTGCGTGCCTGTGTCC	283	3	y	4.4e-05	++++ +++ ++++
chr11:4096597-4096992	301	GAGTGTCGTGAGAGTAGAGGGGAAAGGAACAGAACATGTGTGTGTGTGTGTGTAATTTTAGCCTGCTACTTGGCA	338	3	y	7.7e-10	+++++++++++++++
chr17:46031938-46032988	1	TCTGGCGGTCACCCCCAAAAGCAGGTCAGTCACTTTGCCCCTGTCCCTCTCTCTGTTCGCTCGCCAGCGCGCTCT	40	2	n	8.5e-06	++++ + ++ +++
chr17:46031938-46032988	76	CTCTGACCGGTCTCTCTCTCTCTTCCTTGACTTCTCTCTGGAGCTCTTGATACCTCTTTCGTCTGCTGATTTCCA	86	2	n	3.3e-05	++ ++++ ++ +
chr17:46031938-46032988	226	GCAAAAATAAATTAAAGCGTAAAACAATACAGTTTAAGAAAAAAAAATTAAGAGGTTTGAATATCAAATCCCAGA	264	1	n	7.6e-05	+++++++++ ++ +
chr17:46031938-46032988	751	GAAAGTAGGGGTTGGAAGGCGGAGAGCTGGCAGGGACGTATGAGGATAGGGACAACTAGAGTGACCCCTGGCTTT CTCCCCCACCTcacaaacacactacacacacacacacatgcatgcacgcactcacattgacacacgcgtcctcCC	817	2	n	8.3e-05	++++ ++ + + ++
chr17:46031938-46032988	751	GAAAGTAGGGGTTGGAAGGCGGAGAGCTGGCAGGGACGTATGAGGATAGGGACAACTAGAGTGACCCCTGGCTTT CTCCCCCACCTcacaaacacactacacacacacacacatgcatgcacgcactcacattgacacacgcgtcctcCC	850	3	n	4.9e-09	++++++++++++++
chr17:46031938-46032988	751	GAAAGTAGGGGTTGGAAGGCGGAGAGCTGGCAGGGACGTATGAGGATAGGGACAACTAGAGTGACCCCTGGCTTT CTCCCCCACCTcacaaacacactacacacacacacacatgcatgcacgcactcacattgacacacgcgtcctcCC	866	3	n	2.6e-06	++ +++ +++ +++
chr5:121545913-121546804	301	CAGCCATCTCAGCATCCCGAGGATGCTAGAAGCGGGAAGGAGGGACAAACGAGTTCTTGGCTTCCATGCGGACGG	335	2	y	6.1e-05	+++ + ++ + ++
chr5:121545913-121546804	376	TTTTAGGACTAGCCAGTTTATGAAGCAGAATTGAAGGTttggttgattgattgattgattgattgattaattgat	413	1	y	4.1e-05	+++ +++ +++ ++
chr5:121545913-121546804	526	cggaaatctgcctgcctctgcctcccaaatgctgggattaaaggcgtgtgtcaccaccgcccggctCTGAAGGTT	536	2	n	4.3e-10	+++++++++++++++
chr5:121545913-121546804	676	GAGTTTAGTACACGTCCTTTCTGTTAGATTTCTGAGGCAGTTCAAAGGAACAGACAGGGAGCAAAAGAGAGATGG	719	2	y	6.1e-05	+++ + ++ ++++
chr5:121545913-121546804	826	TGGACTCCTCTACCAGAGGAAAAAGCTGGCTTCGAGGAGCCTATATAGTAAGGGTGTTAAGAATGC	840	2	y	8.3e-05	++++ + + ++ ++
chr4:46554643-46555006	76	CTCCTCCCAATTGCAGAGTGGAGCCTGGGAGGCCTAGGTGGGAGGAGAACAGAGAAGTCACAAGGTATAGAGCAA	103	2	y	9.4e-05	++++++ +++ ++
chr4:46554643-46555006	226	CTCGGCCCAGGGCCTTGGCTTCTTCCTCTACAGAATAGGGGAAGTGAAAAAATTCACTCACAgtgtgtgtgtgtg tgtgtgtgtgtgtgtgtgtgtgtgtgtgtgtAGCCATTTGCAGTAAGGGCTGAGAACGTGCCT	288	3	y	7.7e-10	+++++++++++++++
chr4:46554643-46555006	226	CTCGGCCCAGGGCCTTGGCTTCTTCCTCTACAGAATAGGGGAAGTGAAAAAATTCACTCACAgtgtgtgtgtgtg tgtgtgtgtgtgtgtgtgtgtgtgtgtgtgtAGCCATTTGCAGTAAGGGCTGAGAACGTGCCT	304	3	y	7.7e-10	+++++++++++++++
chr2:158146426-158146645	151	CAGTGGCCAAGAACACGCACCTCTCcacacatatacatgaatataccacacacacacacacacacacac	176	3	n	2.6e-05	++++++ + +++
chr2:158146426-158146645	151	CAGTGGCCAAGAACACGCACCTCTCcacacatatacatgaatataccacacacacacacacacacacac	197	3	n	7.7e-10	+++++++++++++++
chr4:59928526-59928694	76	CACACAGCGCCCCCGAGGGGTTGTGCAATACGGCATATAGGAAGGtttttttttttttttttttttttttttttt	121	1	y	3.7e-09	+++++++++++++++
chr4:59928526-59928694	76	CACACAGCGCCCCCGAGGGGTTGTGCAATACGGCATATAGGAAGGtttttttttttttttttttttttttttttt	136	1	y	3.7e-09	+++++++++++++++
chr11:100472716-100473024	1	agccgccgccatcttgacgccgccgTACCGGCCCCCTCAGCTTCCGAACGGTGCGGCAAGTCTGATGCGACACAG	31	2	n	5.3e-05	+ ++++ ++ +++
chr11:100472716-100473024	226	CTGTGCTTGTTTTGTTGAATTTTCTTCTACTTTATGTTGCTTTGGAGTGTATCCTCGCCATCACACGCACACACA TTTTTTGT	232	1	y	1.7e-05	++ +++++++ ++
chr11:100472716-100473024	226	CTGTGCTTGTTTTGTTGAATTTTCTTCTACTTTATGTTGCTTTGGAGTGTATCCTCGCCATCACACGCACACACA TTTTTTGT	287	3	n	1.5e-07	+++++ ++++++++
chr14:7913964-7914246	151	AGGTCATGGGGCAGACTTACCCTTAGCGAAGTTTCTGAATATAgtgtgtgtgtgtgtgtgtgtgtgtgtgtgtgt	194	3	y	7.7e-10	+++++++++++++++
chr14:7913964-7914246	151	AGGTCATGGGGCAGACTTACCCTTAGCGAAGTTTCTGAATATAgtgtgtgtgtgtgtgtgtgtgtgtgtgtgtgt	210	3	y	7.7e-10	+++++++++++++++
chr9:61681111-61681295	76	GGAGAGAGAGTTTGTGGCAGGAAGCAGGCcagaaaaaaaaaaaaaaacctaaaaacaaaaacaaaaccagaatca	108	1	n	3.7e-09	+++++++++++++++
chr9:61681111-61681295	76	GGAGAGAGAGTTTGTGGCAGGAAGCAGGCcagaaaaaaaaaaaaaaacctaaaaacaaaaacaaaaccagaatca	126	1	n	2e-07	+++++ +++++ +++
chr15:102399719-102400146	1	GACCCTGCCCTAGGCGGAAATAAAGTGCAAGCCCCGCCCCAGTCACCCCGCGGTGGGACCCCAGGCAGTAAACCC	33	2	n	8.9e-05	++ +++ + + + ++
chr15:102399719-102400146	301	CCAATTTTGGTTAAAAGTGGAACTAAAAAAAAAAAAAAAAAAGCCTGCCAGGCAGGACCCATCACCTTCCGGGTG	325	1	n	3.7e-09	+++++++++++++++
chr5:100674271-100675305	151	ccatctctccatctccAGGCTTCTTAATGAACTCAAAAGGAGAGTGTTTGTTTATTTGTATGGAATAGTTCTACC	197	1	y	1.5e-05	+++ +++ +++++ +
chr5:100674271-100675305	226	ATAAAAAGAAAAACTTAAGTCCAAAAATGTTAACTACATGGAATGTTCACCTTCTAACACTAAAAGGGAAACAAA AAGCCAAATCAAATTATGTAAATTTTtatatatgtatattcatatatacatatactcatatatatacatatatat	229	1	n	6.8e-05	++++ +++++ ++
chr5:100674271-100675305	226	ATAAAAAGAAAAACTTAAGTCCAAAAATGTTAACTACATGGAATGTTCACCTTCTAACACTAAAAGGGAAACAAA AAGCCAAATCAAATTATGTAAATTTTtatatatgtatattcatatatacatatactcatatatatacatatatat	294	1	n	9.4e-06	+++++++++ +++
chr5:100674271-100675305	226	ATAAAAAGAAAAACTTAAGTCCAAAAATGTTAACTACATGGAATGTTCACCTTCTAACACTAAAAGGGAAACAAA AAGCCAAATCAAATTATGTAAATTTTtatatatgtatattcatatatacatatactcatatatatacatatatat	345	3	n	4.9e-05	+ +++ + ++ ++
chr5:100674271-100675305	526	cgggaggcagaggcagtcagatctttacgttttcggccagcttactaaagagtgagttccaggacagccagagct	528	2	y	2.5e-08	++++++++++++++
chr5:100674271-100675305	601	acacagagaaaccctgtcttgaaaaataaaaCAAAGAAAAACAAAACAATAACCAACTTTATGCGACCCTTGTTA	638	1	n	4.1e-06	++++ ++++ ++ ++
chr2:170319310-170319510	1	TAAACCCCACCCCCCAGCAACGGCGGTGTAAACACTCTCCATCAGGAAGCTGAAACGCAGTTGCCCTCTGCTGGG GAGATGAAGGCAGCTTGCTGGGGGCGAGGACCGTGCTAGCAACCTTCCCTGGTGCACACGGGCTCTGGTGCATGA	75	2	y	6.9e-05	++++ ++++++
chr2:170319310-170319510	151	CGGGAACGGAAACGCGGAACTAAAGTCAGTCCTGCttttttttttttttt	186	1	y	3.7e-09	+++++++++++++++
chr16:13671820-13672849	1	TGTGCTTGGCTCGGACGAAAAGGAAGGGGCGGGTCGCGTTGGTGCGCATGCGCCCGCATGCCCCTAGAGCAGCCG	19	2	y	6.9e-05	+++ ++ +++ ++
chr16:13671820-13672849	526	GGGGTCTGGGTCAGAGCCACTCGACCCTGGGGTGGTGACAGAGATGGGTCTTGTTTCCACTTACTTGCGGGCTAT	559	2	y	8.3e-05	++ + +++++ ++
chr16:13671820-13672849	751	CTCAAAAATCGTGTGCTGATGAGAGCGTGTGTGTGTGTGTGTGTTTTAGAAGAGAGACGCTGTGTCTAACTGGGG	777	3	y	7.7e-10	+++++++++++++++
chr3:116423941-116425267	1	TCCGGAGGTGTCCGCGGGGCTAGTAGCAGCTGCTCAGACTCCTCCTTCGCCACCTCCTTTCAGCAGCAActcttc ctccctctcctcctcctcctcctcTTAGGTCCGCCCCCAGACCTGCCTCCCCGCCCTCCCTCGTCCCCCTCCACT	75	2	n	1.2e-05	+++ +++++ + +
chr3:116423941-116425267	1	TCCGGAGGTGTCCGCGGGGCTAGTAGCAGCTGCTCAGACTCCTCCTTCGCCACCTCCTTTCAGCAGCAActcttc ctccctctcctcctcctcctcctcTTAGGTCCGCCCCCAGACCTGCCTCCCCGCCCTCCCTCGTCCCCCTCCACT	130	2	n	1.4e-05	+++ ++++ ++ ++
chr3:116423941-116425267	526	GCGCGCGCGcacacacacacacacacacacagagacacacacgcacgcgcgcgcagacacacacaTTGAAAAACC	535	3	n	7.7e-10	+++++++++++++++
chr3:116423941-116425267	526	GCGCGCGCGcacacacacacacacacacacagagacacacacgcacgcgcgcgcagacacacacaTTGAAAAACC	553	3	n	3.5e-07	++++ + ++++++++
chr3:116423941-116425267	526	GCGCGCGCGcacacacacacacacacacacagagacacacacgcacgcgcgcgcagacacacacaTTGAAAAACC	575	3	n	6.1e-07	+ + ++ ++++++++
chr3:116423941-116425267	826	TTGGCCACAGGTGTGAGCGCAAAATTACACCAGAAGTGTAAGGCTCTAGTCTCGGACTGTAGGCTATCCTAGGCG AAGGGAGAAGAGGGAAAAGGATCTCTTGTCCACAAGAGAAATGAACAGAAGATTTCTGTAGTCTTGGCTGGAGCG	900	2	y	8.3e-05	+ +++ +++ + ++
chr8:84976338-84980235	526	TCTCCCTCCATCCGCCCAGCTTGGAAGAAAAAAGAGACCACAGAAATTAATAAAGACAATTTTTTTTTTACTTAA	585	1	y	9.9e-05	++++++++++ ++
chr8:84976338-84980235	601	ATAGATTCAATAAAAAGTCAAACACACACACACAAACACATCTTAAAATAGACTTTAGACACGAAGTGCGTGTTT	625	3	n	9.7e-09	++++++++++ ++++
chr8:84976338-84980235	751	CAAGCGGCGGGGCCAGCTCCGCCGCGACAGCCCCCTTCTCCCCTCCCTGTTAAATACACAAATATATTATATTCA	802	1	n	9.4e-05	+++ + +++++ + +
chr8:84976338-84980235	826	ATATGAATTCAGTCTCTTTGCAGAAAAAAAAAACATACAAAATACGCTGGAAGGGGGCCATGTAAACCTCGAGGT	852	1	n	1.1e-06	+++++++++ + +++
chr8:84976338-84980235	1201	CACCTTGTCCTCCAGGCGCGCGATGCGCTCCAGCTTCCGCTTCCGGCACTTGGTGGCCGCCAGCCTGTTCCGCAG	1230	2	n	1.3e-05	++ ++ ++ ++ +++
chr8:84976338-84980235	1501	GGTCCCGGAGCCTCCAGAGGGTGCAGAGGCTGGGGAGTAACTGCTGAGGTTGGTGTAGACGGGAGGCGGCTCCGG	1519	2	y	6.7e-06	++ ++++++++ ++
chr8:84976338-84980235	2251	CGTAAAGGCGCTGCTGGGCTTCCGGAGATTTTCTCTCCCTCCGTGGTGCGCCTGCTTTCTCGGCGTCGCTTCCCT CAGTTCCCCGCTCCCAGCAGGATCCTACGCTGGCCTGGCCACCCTCAAAGTCCCCAGTGCTCGGCCCCAGCCCCA	2278	2	n	7.3e-05	+ ++++ +++++
chr8:84976338-84980235	2251	CGTAAAGGCGCTGCTGGGCTTCCGGAGATTTTCTCTCCCTCCGTGGTGCGCCTGCTTTCTCGGCGTCGCTTCCCT CAGTTCCCCGCTCCCAGCAGGATCCTACGCTGGCCTGGCCACCCTCAAAGTCCCCAGTGCTCGGCCCCAGCCCCA	2319	2	n	4.3e-05	+ + ++++ + ++
chr8:84976338-84980235	2551	CACGAGCCGGGTGGCTCTGCGCGGCTGCAGGGGGAGGGGCTGTGGAGACAGAGACACACAAGCAAAGGGATGTTG	2573	2	y	4.1e-05	++ ++++ ++ +++
chr8:84976338-84980235	2551	CACGAGCCGGGTGGCTCTGCGCGGCTGCAGGGGGAGGGGCTGTGGAGACAGAGACACACAAGCAAAGGGATGTTG	2594	2	y	7.8e-06	++++ +++++ ++
chr8:84976338-84980235	2626	AGGGGCCGAGGCACATAGGGGCTAGAACTGCGGGAGTACAGCCAGGTGCTTATGAGATACACTGCAAGTGGAGAT	2626	2	y	8.9e-05	+ +++ ++++++
chr8:84976338-84980235	3301	ACCTCAGCCCAAAGCCCTCCCTTAGTCACCCGGGGCTCGCCCGATATCCTGTCAGCTTTTGGAGGGCCGATGGGG	3316	2	n	3.8e-05	+++ +++ + + ++
chr8:84976338-84980235	3376	CGGGATAGCTGGGGTGCGGTCGCCCAACCCCACTCCCTTCCTTAGAAACAGGCTAGGGAAAGAGAGCCGAGGCAG GAAGTGTGGCAACAGCCCCGAGGGGGAAAGAGCCCGGCCCTGTCTCGTCATTGTGAGCCTAGGGGATGGTGCACC	3437	2	y	6.2e-06	+ ++ ++++++++
chr16:91522693-91523191	151	AAGTGTCCAAAACAAACAAACAAACAAAAAGGTCTTTCATTACAAAATAAGGACCACTAGCCAGACATAACCGTG	160	1	n	4e-08	+++++++++++ +++
chr16:91522693-91523191	226	CATATGATGTCATAATCTCAGCACTCCAGACCTAAGGCAGGATGACTTCCTGTCTCAGACACTACAAATgaggga	274	2	n	6.9e-05	++++ +++ + + +
chr16:91522693-91523191	301	tgcgagggatgcgagggatACGGATGCTGATTTGAAGCAGTGtcaaactgtctcctctctcagtcgctttccgtc	354	2	n	4.1e-05	+++ +++ + + +
chr7:28981774-28982226	1	AGGCACGGTGCTTAGCACTAGAGGACCGGAAGAGAGGTGTAGGAAGCGGAACCTGCGTCACACCCTCCCTCCAGC TCCTACAAGGAAGGCAAAGGGAAAGGCGCTTTCAGCACCAGCGCCGGTTGtttttttttttttttttttttGTCT	64	2	n	1.5e-05	+++ ++++ ++++
chr7:28981774-28982226	1	AGGCACGGTGCTTAGCACTAGAGGACCGGAAGAGAGGTGTAGGAAGCGGAACCTGCGTCACACCCTCCCTCCAGC TCCTACAAGGAAGGCAAAGGGAAAGGCGCTTTCAGCACCAGCGCCGGTTGtttttttttttttttttttttGTCT	85	2	y	2.1e-05	+ +++++ +++ +
chr7:28981774-28982226	1	AGGCACGGTGCTTAGCACTAGAGGACCGGAAGAGAGGTGTAGGAAGCGGAACCTGCGTCACACCCTCCCTCCAGC TCCTACAAGGAAGGCAAAGGGAAAGGCGCTTTCAGCACCAGCGCCGGTTGtttttttttttttttttttttGTCT	126	1	y	3.7e-09	+++++++++++++++
chr8:116732727-116733036	151	ccgtgcgtgtgcgcgcggggggcccgggttgcgcgcgcgcgtgagcgcgtgtgtgcgtgcgtgtgtataagtgtg	153	3	y	7e-06	+++ +++++ + + +
chr8:116732727-116733036	151	ccgtgcgtgtgcgcgcggggggcccgggttgcgcgcgcgcgtgagcgcgtgtgtgcgtgcgtgtgtataagtgtg	199	3	y	1.8e-08	+++++++ +++ +++
chr8:116732727-116733036	226	tggtgtatgtgtgtgtgtttgcgtgcgcgcgcgcgcgcgtgtctgtgtgtgagtgtgtgtgagagtgtgtgcgcg cgagtgtgt	228	3	y	3.3e-09	++++ ++++++++++
chr8:116732727-116733036	226	tggtgtatgtgtgtgtgtttgcgtgcgcgcgcgcgcgcgtgtctgtgtgtgagtgtgtgtgagagtgtgtgcgcg cgagtgtgt	270	3	y	3e-07	+++++++ +++++++
chr8:116732727-116733036	226	tggtgtatgtgtgtgtgtttgcgtgcgcgcgcgcgcgcgtgtctgtgtgtgagtgtgtgtgagagtgtgtgcgcg cgagtgtgt	294	3	y	6.6e-06	+++ + + + +++++
chr16:22548231-22548561	76	TCCCCTGCGAGACGCTGGCTTTTGAGAGGAAACCTCTAAGTTCCTGGAGGGGTTCCAGGAGGCCAAAGGCAGGCT	134	2	y	2.2e-05	+ + ++ +++++++
chr16:22548231-22548561	226	CAGGTTTCTGACATTTTTTTTTTTTTTTCCTTCTTAGAAATGGAAACCCTCCTTCCGGCAACGTGGCAGGAAAGC	239	1	y	3.7e-09	+++++++++++++++
chr2:167004643-167004830	76	tcttctggcctttgtggtcattacaactagatctacatgcaggcaaaacacccatacacatcaaacaaacaaaca aaCAAATAAACAAATcaagcaagcaagcaagcaagcC	138	1	n	4e-08	+++++++++++ +++
chr2:167004643-167004830	76	tcttctggcctttgtggtcattacaactagatctacatgcaggcaaaacacccatacacatcaaacaaacaaaca aaCAAATAAACAAATcaagcaagcaagcaagcaagcC	154	1	n	1.2e-06	+++ +++++++ ++
chr2:167081785-167082017	151	AGATGTTCTCATTCCTTACAGTGCTCTAGAgtgtgtgtgtgtgtgtgtgtgtgtgtgtggtgtatatgtgcctgt atgagtg	181	3	y	7.7e-10	+++++++++++++++
chr2:167081785-167082017	151	AGATGTTCTCATTCCTTACAGTGCTCTAGAgtgtgtgtgtgtgtgtgtgtgtgtgtgtggtgtatatgtgcctgt atgagtg	214	3	y	6.2e-06	+ ++++ +++ ++
chr17:87446721-87447397	76	CTGCAAGGGCTACGGGTTTCCGAGACGCGACCAGACAACCGCTCGACTCGCTCGCTCCACTCGGACTAATTCTCC TCCTCCGCCCCCAGCTCCTCATAAACACCTCCCTCCGCCTCCCTCCGCCAGATCCCTCCGCCTCATCCAGATAAC	148	2	n	6.9e-05	+ ++++ +++ ++
chr17:87446721-87447397	76	CTGCAAGGGCTACGGGTTTCCGAGACGCGACCAGACAACCGCTCGACTCGCTCGCTCCACTCGGACTAATTCTCC TCCTCCGCCCCCAGCTCCTCATAAACACCTCCCTCCGCCTCCCTCCGCCAGATCCCTCCGCCTCATCCAGATAAC	178	2	n	8.3e-08	+++ ++++ ++++++
chr17:87446721-87447397	226	GGAACCTAGCGAACGAGTCCCGGCCAGCCCCCGCCCCCTCCCCCCCCCCAACTCTCCGGGAGACCCCCTTTCTCC	249	2	n	2.5e-05	++ +++ + +++ ++
chr17:87446721-87447397	601	GGCTCTCTCTGCGCTCGGCTGGAGGACCTTCTTCCACCCGTCCTGCCTGCCACAGACACACGCACACACTCACCT	659	3	n	2.3e-07	+++ +++++++ +++
chr1:37691338-37691548	76	CAGTGGGAGGGGCGCTCAGTGGGAGGAGGGGCTGGAGGGGAGCGCAACGGTGAAGTACTTGCCTGACACAACACT	96	2	y	7.8e-05	++ + ++ +++ ++
chr1:37691338-37691548	151	CCAAACTTATAAAGCAAGAAGAAAGCAGGTGCCATACGAAAAAAAAAAAAAAAAAAAGCC	189	1	n	3.7e-09	+++++++++++++++
chrX:36989489-36989811	301	GAATTGTcacacacacacacac	308	3	n	7.7e-10	+++++++++++++++
chr16:91869691-91870398	151	TCTGGTTCCTCCCGTAAGACATGCAGCATTGCTCTGCCTCTGCCAAGCTTGGTTTGCAGAACTGAACGCAGACCA	177	2	n	6.9e-05	+ + +++++++++
chr16:91869691-91870398	226	CTGCTGCATTTGCAACAGTCTCTTTGAAGACCTTCTGTGATGCAAAACTATCTCGTGGGGTTTTGGTTTTGTTTT	286	1	y	2.2e-06	++++ ++++ ++++
chr16:91869691-91870398	301	AAATTTTCATTCTTTCTGTAGCATGTTCCCCCTCCTTCCCCTCCCTCCTCCtttttcttttcctggtttgttttt ttttgtttttgtttttttCCTGAATCATTTTGGCACCATGCTGTGTACATGCCTGACTCATTTTCCTAGCTTGGG	334	2	n	1.9e-06	+++ ++ ++ +++++
chr16:91869691-91870398	301	AAATTTTCATTCTTTCTGTAGCATGTTCCCCCTCCTTCCCCTCCCTCCTCCtttttcttttcctggtttgttttt ttttgtttttgtttttttCCTGAATCATTTTGGCACCATGCTGTGTACATGCCTGACTCATTTTCCTAGCTTGGG	375	1	y	5.1e-08	+++++ +++++++++
chr16:91869691-91870398	301	AAATTTTCATTCTTTCTGTAGCATGTTCCCCCTCCTTCCCCTCCCTCCTCCtttttcttttcctggtttgttttt ttttgtttttgtttttttCCTGAATCATTTTGGCACCATGCTGTGTACATGCCTGACTCATTTTCCTAGCTTGGG	427	2	n	4.6e-05	++++ +++ +++
chr16:91869691-91870398	451	TTTTGCTCATTGTTTTGTTTTGCTTATGTGTTGTTTTCCTCCTTTTTCTAGGAATCATATGTTGTCCATCCCCCC	457	1	y	6.4e-05	+ ++ ++++ ++++
chr8:120538724-120539026	151	CTGTGCCGAAGCCGCTTGCTCAACACTTCTCACAGCCACCGGGTCACGCCTGACCACCTCCTGGGgtgtgtgtgt gtgtgtgtgtgtgtgtgtgtgtgtgtgtgtgtgCGCCTTGATGGCTTGGTACAAGGTTGGCTTTTGTCGCCTGGT	216	3	y	7.7e-10	+++++++++++++++
chr8:120538724-120539026	151	CTGTGCCGAAGCCGCTTGCTCAACACTTCTCACAGCCACCGGGTCACGCCTGACCACCTCCTGGGgtgtgtgtgt gtgtgtgtgtgtgtgtgtgtgtgtgtgtgtgtgCGCCTTGATGGCTTGGTACAAGGTTGGCTTTTGTCGCCTGGT	232	3	y	7.7e-10	+++++++++++++++
chr8:120538724-120539026	151	CTGTGCCGAAGCCGCTTGCTCAACACTTCTCACAGCCACCGGGTCACGCCTGACCACCTCCTGGGgtgtgtgtgt gtgtgtgtgtgtgtgtgtgtgtgtgtgtgtgtgCGCCTTGATGGCTTGGTACAAGGTTGGCTTTTGTCGCCTGGT	248	3	y	6.9e-05	+++++++++++ +
chr15:77970753-77971282	1	CGAGGAGTCAAGGCAGGAGGGAAGATGCGCGCGCAGGGGCCGGTGCCGTAAACGGCGACCAGCGCTGTCGTAAAT	3	2	y	8.9e-05	+ + +++++++
chr15:77970753-77971282	151	GCTCTCGGCTTTaaaaaaaaaaaaaaaaaaaaTCCTCGTTCGCCCCTGAGGTGCCAGACACAAGTGAGGGGATTA	163	1	n	3.7e-09	+++++++++++++++
chr15:77970753-77971282	226	CGTCAGTGGCGTCTGGGGACGCCCGGAGAGGTTCAGAACTGAATCGTGGTCACGCTCGGGGCCAGAGAAGCCGGG GCGGGGAGTCGGAGCTGTCCCCGCGGTGTCCCATAATGCTTCGCGCCAGGCTCGCCTCCTCTGCCTCCCACAATG	291	2	y	4.1e-05	++ ++ + +++ ++
chr15:77970753-77971282	226	CGTCAGTGGCGTCTGGGGACGCCCGGAGAGGTTCAGAACTGAATCGTGGTCACGCTCGGGGCCAGAGAAGCCGGG GCGGGGAGTCGGAGCTGTCCCCGCGGTGTCCCATAATGCTTCGCGCCAGGCTCGCCTCCTCTGCCTCCCACAATG	354	2	n	9.2e-06	+ +++++++++++
chr10:95180308-95181254	301	GATAAGAGAGTGATTGTAAAGGATGCCTTAGCTCAACATTCATGTATGTAGCtgtgtgtgtgtgtgtgtgtgtgt gtgtgtgtgtgtgtgtgtatgtgtgtatgtgtAGTACTCCAGAGTGGGAGAGAACTGACCAGCAACACTAGCTCC	354	3	y	7.7e-10	+++++++++++++++
chr10:95180308-95181254	301	GATAAGAGAGTGATTGTAAAGGATGCCTTAGCTCAACATTCATGTATGTAGCtgtgtgtgtgtgtgtgtgtgtgt gtgtgtgtgtgtgtgtgtatgtgtgtatgtgtAGTACTCCAGAGTGGGAGAGAACTGACCAGCAACACTAGCTCC	370	3	y	7.7e-10	+++++++++++++++
chr10:95180308-95181254	301	GATAAGAGAGTGATTGTAAAGGATGCCTTAGCTCAACATTCATGTATGTAGCtgtgtgtgtgtgtgtgtgtgtgt gtgtgtgtgtgtgtgtgtatgtgtgtatgtgtAGTACTCCAGAGTGGGAGAGAACTGACCAGCAACACTAGCTCC	386	3	y	1.7e-09	++++++++ ++++++
chr10:95180308-95181254	601	CCAACCCATTATCTTAGGGAGGAGAggctagttttatgtcaacttgacacaggctagagaggaggaaacctcaat	617	2	y	6.9e-05	++ + ++++++ +
chr17:28697445-28697638	1	cacacacacatacacacacacacacacaTCCCGCCTACACACACTGCTTTATCATCTGGTTGCAGAAAGTAAGTT	13	3	n	7.7e-10	+++++++++++++++
chr17:28697445-28697638	1	cacacacacatacacacacacacacacaTCCCGCCTACACACACTGCTTTATCATCTGGTTGCAGAAAGTAAGTT	30	3	n	7.3e-05	+ + + ++++++++
chr11:116198719-116199247	1	TGGGGGCAGAGGAGGTGGCGACAGAAGTGACAGGCACCAAAGCGATGACAACCTGTCTCCGCAGCTCAGGCGCCG	2	2	y	4.6e-05	++ ++++++++ +
chr11:116198719-116199247	1	TGGGGGCAGAGGAGGTGGCGACAGAAGTGACAGGCACCAAAGCGATGACAACCTGTCTCCGCAGCTCAGGCGCCG	52	2	n	6.9e-05	++++ +++ ++ +
chr11:116198719-116199247	451	GCGGTGGGTGTGTGTGTGTGTGGGGGGGGGGTCCTCTCACCACAGTGTCCCCGGAAACCAGAAGGGAATGGGTGT	458	3	y	7.7e-10	+++++++++++++++
chr10:80172903-80173320	301	TGAGTCAGGGGGAGGAGGAAATGGGCGGGAGGGCACGTGATTCAGGCTGCCGACTGGGTTTTTTTGTTTGTTTGT TTTTTTTTTTTTttttggtttttcgagacagggtttctctgt	301	2	y	6.1e-05	+++ +++ ++ +++
chr10:80172903-80173320	301	TGAGTCAGGGGGAGGAGGAAATGGGCGGGAGGGCACGTGATTCAGGCTGCCGACTGGGTTTTTTTGTTTGTTTGT TTTTTTTTTTTTttttggtttttcgagacagggtttctctgt	375	1	y	3.7e-09	+++++++++++++++
chr7:30955980-30957706	76	TCGGAGCCTCTCCCTGTCCCGCCGCACGCGTCTGCCCTTCCTCAGCTCACCCCGGCGCTGGCCCTCCGGGCTCCC	111	2	n	5e-05	+++ ++++ ++ +
chr7:30955980-30957706	376	cccccgtggcccccgcAAACACTCACCTTCCTGCAGCTCAACGCCCTCCTCGGCCTCGGGTCCCTTGTCGTGGCT	419	2	n	8.3e-05	++ ++++ +++++
chr7:30955980-30957706	751	ATCCAGACCCGGGTCCAGCATGTCCATggggggggcgggggggaggggaggggagggaggggagggggcgggcgg	802	2	y	2.2e-05	+++++ ++ ++ ++
chr7:30955980-30957706	976	gcagctgccgcctcctcctgccgcctccgcccgccgccgGCTCCGGGCGGTGCGAGGCTCCGGGCCACAGCTCAG	986	2	n	1.9e-05	+++ + +++++ ++
chr7:30955980-30957706	1126	GACTTGAGCtttttttttttttttttttttCAACAGGGCCCTGCCCGGATGGCGGCCGCCCTGTTGCCCAGATCG	1135	1	y	3.7e-09	+++++++++++++++
chr7:30955980-30957706	1276	TATCACCCCCCCCCCTTCTCTTTTTCCTTTTTTTTTTTTTTTTCCTCCTTTACTGGAGCTgcgcgcgcgcggtgg	1303	1	y	3.7e-09	+++++++++++++++
chr7:30955980-30957706	1426	GCTGTCTGTCTTTGGTGACGGCCGGGCGCGTACACACACATAGGCCCGGGGACTCTACACGGGACCACCACCGGT	1454	3	n	1.4e-05	+ +++++++++ +
chr15:35938093-35938328	151	CGCGCATCCAGCCGGTCACAGCTGAAATTTATGCCAGTTACACTATGTCTTTTTTTTTTTTTTTTTTCCCTAAAC	200	1	y	3.7e-09	+++++++++++++++
chr2:10142866-10143110	1	AGAATGTCTATCTCCACTAGGTGGCAGACAGAGGTCATCACTTTAGGGCTACTGCAAGGGCTGGTCTAAACTGGA	20	2	y	6.1e-05	++ ++++++ +++
chr2:10142866-10143110	151	TGTAATTAGAGCTTTACTACAGTGTCCTTAAGTAAATACAGGCTTTCTGTTGTGTGTGTGTGTGGGGGGGGTTAT	200	3	y	1.8e-08	++++++++++++++
chr17:24859194-24860417	76	CCCCTCTTATTCAAGCTGTCATGGGCTGATAACAGGAAGCCACATCAGGACATGCCAGCCTTGGGAGAAGAtgtg tgtgtgtgtgtgtgtgtgtgtgtgtgtgtgtgtgtgtgtgtgtgtgtgtgtgtgtgtgtgtgtgtatgtgtgtgt atgtgtgtatgtgtgtgtgcacgtgtgtgtgtgtgtgtgtgtgtgtgtgtgtgtTGGCTGTCATTCCCTAGGTAC	148	3	y	7.7e-10	+++++++++++++++
chr17:24859194-24860417	76	CCCCTCTTATTCAAGCTGTCATGGGCTGATAACAGGAAGCCACATCAGGACATGCCAGCCTTGGGAGAAGAtgtg tgtgtgtgtgtgtgtgtgtgtgtgtgtgtgtgtgtgtgtgtgtgtgtgtgtgtgtgtgtgtgtgtatgtgtgtgt atgtgtgtatgtgtgtgtgcacgtgtgtgtgtgtgtgtgtgtgtgtgtgtgtgtTGGCTGTCATTCCCTAGGTAC	164	3	y	7.7e-10	+++++++++++++++
chr17:24859194-24860417	76	CCCCTCTTATTCAAGCTGTCATGGGCTGATAACAGGAAGCCACATCAGGACATGCCAGCCTTGGGAGAAGAtgtg tgtgtgtgtgtgtgtgtgtgtgtgtgtgtgtgtgtgtgtgtgtgtgtgtgtgtgtgtgtgtgtgtatgtgtgtgt atgtgtgtatgtgtgtgtgcacgtgtgtgtgtgtgtgtgtgtgtgtgtgtgtgtTGGCTGTCATTCCCTAGGTAC	180	3	y	7.7e-10	+++++++++++++++
chr17:24859194-24860417	76	CCCCTCTTATTCAAGCTGTCATGGGCTGATAACAGGAAGCCACATCAGGACATGCCAGCCTTGGGAGAAGAtgtg tgtgtgtgtgtgtgtgtgtgtgtgtgtgtgtgtgtgtgtgtgtgtgtgtgtgtgtgtgtgtgtgtatgtgtgtgt atgtgtgtatgtgtgtgtgcacgtgtgtgtgtgtgtgtgtgtgtgtgtgtgtgtTGGCTGTCATTCCCTAGGTAC	196	3	y	7.7e-10	+++++++++++++++
chr17:24859194-24860417	76	CCCCTCTTATTCAAGCTGTCATGGGCTGATAACAGGAAGCCACATCAGGACATGCCAGCCTTGGGAGAAGAtgtg tgtgtgtgtgtgtgtgtgtgtgtgtgtgtgtgtgtgtgtgtgtgtgtgtgtgtgtgtgtgtgtgtatgtgtgtgt atgtgtgtatgtgtgtgtgcacgtgtgtgtgtgtgtgtgtgtgtgtgtgtgtgtTGGCTGTCATTCCCTAGGTAC	218	3	y	1.7e-09	++++++++ ++++++
chr17:24859194-24860417	76	CCCCTCTTATTCAAGCTGTCATGGGCTGATAACAGGAAGCCACATCAGGACATGCCAGCCTTGGGAGAAGAtgtg tgtgtgtgtgtgtgtgtgtgtgtgtgtgtgtgtgtgtgtgtgtgtgtgtgtgtgtgtgtgtgtgtatgtgtgtgt atgtgtgtatgtgtgtgtgcacgtgtgtgtgtgtgtgtgtgtgtgtgtgtgtgtTGGCTGTCATTCCCTAGGTAC	248	3	y	7.7e-10	+++++++++++++++
chr17:24859194-24860417	76	CCCCTCTTATTCAAGCTGTCATGGGCTGATAACAGGAAGCCACATCAGGACATGCCAGCCTTGGGAGAAGAtgtg tgtgtgtgtgtgtgtgtgtgtgtgtgtgtgtgtgtgtgtgtgtgtgtgtgtgtgtgtgtgtgtgtatgtgtgtgt atgtgtgtatgtgtgtgtgcacgtgtgtgtgtgtgtgtgtgtgtgtgtgtgtgtTGGCTGTCATTCCCTAGGTAC	264	3	y	7.7e-10	+++++++++++++++
chr17:24859194-24860417	1051	GGAGGCGGGCACAACCATAGAAGGTGTGGTGGGAGGGAGGGCCAGACATCTGCAGCTGTAGTCTAGGATAAAGCC	1082	2	y	1.7e-05	+++++ ++ + +++
chr17:24859194-24860417	1126	TGCCAGGCAGAGAGAGGTAGACTGGGCACTGAGAGGCAACAGGGGATAGTACTGGGGACAGGCAGGCAGGAGGTG	1128	2	y	3.3e-05	++++++++ +++
chr12:108179303-108179883	151	ACCGGGGCGGAGCCGTATCCGAAGACTCGATTGGTTAGATCTCGCGCTGTGATTGAACGACGGGAGCCCTGGCTC CGCCTCCGGGCCGAAGTTCCGTTAACAGGTTCGGTTGCTCCCGAACTCCCTTTCGCCAAGGGGGTGGGGCGATGG	218	2	n	5.6e-07	++++ +++ ++++++
chr12:108179303-108179883	376	TGTTGACTTGTTACTTTTTTTCTTTTTTTTAGCTTTACTTTCTTCTAATTGGTTGACAGGCACCTGACTTTCGCC	390	1	y	4.4e-07	+++++++ +++++++
chr2:84715097-84715872	601	ATAGCCAATCACCGTTAAGCCTTTCCGGCTTCCTTCCTTGCCTCTTCATTCATTGGTGTGAGGATTCGGTCGGGC	637	2	n	2.7e-05	+ +++++++ + + +
chr2:84715097-84715872	676	AGCCCCTCCAACACACACACtttttttttttttttttttctttAAGGACTGAAACTTTATTTAAAACAATCCGTT	696	1	y	3.7e-09	+++++++++++++++
chr2:153600645-153601288	76	GAAAAAAAAATTAGTTaaaaggaaagaagcaagtaaataaagaaaaaaaggagtgggagggagggaggaaagaga cagaaaaagaaacaggctagggggtggggtgtgcacccttagtcctagcacttgggaggcagagagaggtggatc	110	1	n	1.7e-06	+++ +++ +++++++
chr2:153600645-153601288	76	GAAAAAAAAATTAGTTaaaaggaaagaagcaagtaaataaagaaaaaaaggagtgggagggagggaggaaagaga cagaaaaagaaacaggctagggggtggggtgtgcacccttagtcctagcacttgggaggcagagagaggtggatc	125	2	y	2.5e-05	++++ ++++ +++
chr2:153600645-153601288	76	GAAAAAAAAATTAGTTaaaaggaaagaagcaagtaaataaagaaaaaaaggagtgggagggagggaggaaagaga cagaaaaagaaacaggctagggggtggggtgtgcacccttagtcctagcacttgggaggcagagagaggtggatc	146	2	y	3.3e-05	+++ ++++ ++
chr2:153600645-153601288	76	GAAAAAAAAATTAGTTaaaaggaaagaagcaagtaaataaagaaaaaaaggagtgggagggagggaggaaagaga cagaaaaagaaacaggctagggggtggggtgtgcacccttagtcctagcacttgggaggcagagagaggtggatc	205	2	y	2.3e-08	++++++++++ +++
chr2:153600645-153601288	226	tctgagttcaaggccagcctggtctacaagacagccagggctacttggagaaaccctgaagaggggccgggggag ggggaagagggggaggggaagaggcagtggaaTGTGCTAGACAAGCAGCCAGGGTCACCTTGGATTTCATTCCAA	287	2	y	2.9e-05	+ +++ + ++ +++
chr2:153600645-153601288	226	tctgagttcaaggccagcctggtctacaagacagccagggctacttggagaaaccctgaagaggggccgggggag ggggaagagggggaggggaagaggcagtggaaTGTGCTAGACAAGCAGCCAGGGTCACCTTGGATTTCATTCCAA	314	2	y	1.8e-05	+ ++ ++++++++
chr2:153600645-153601288	601	CCTTGGACAGGTCGGAGGGCAGGAGAGCAGAAACAGGCCGGCC	623	2	y	1.4e-05	+ +++++ ++++
chr7:99534935-99536481	1	CAGCTAGTTGGCTCTCGGTCCCTTCTTTATCTCCTGTTCTCACTGCTTCCTCTTTCTGCCTGCCCCTCCCCTTTC	49	2	n	8.5e-06	+++ +++++++ +
chr7:99534935-99536481	151	GGTGGTATCTCTCCAGAAGGGCGGGGGTGGGGAGGGTGGAGCAAAGGGCGAAGGCCTGGCTAGGCTTTTGGAATC	181	2	y	7.8e-05	+++++ + +++
chr7:99534935-99536481	301	CAGACACAAAGGCCAGTCCTGGCGTGCGCGGGAGAGAGCGCTCGCACCCACGACTGTGAGCACACATACACAACT	357	3	n	1.6e-05	++++++ ++++
chr7:99534935-99536481	376	GCACAAAGACGTGCTACCTCTacacacacacacacacacacacacacacacacacactctctctctctctctctc	398	3	n	7.7e-10	+++++++++++++++
chr7:99534935-99536481	376	GCACAAAGACGTGCTACCTCTacacacacacacacacacacacacacacacacacactctctctctctctctctc	414	3	n	7.7e-10	+++++++++++++++
chr7:99534935-99536481	376	GCACAAAGACGTGCTACCTCTacacacacacacacacacacacacacacacacacactctctctctctctctctc	433	2	n	1.9e-05	++ ++++ +++
chr7:99534935-99536481	451	tctctctctctctctctcCACACCCCACCTCCCGACAGGCTCGCGCGCACAGCCGTGCACACGCACCAGCACTGG	455	2	n	6.2e-06	++ ++++ ++++
chr7:99534935-99536481	451	tctctctctctctctctcCACACCCCACCTCCCGACAGGCTCGCGCGCACAGCCGTGCACACGCACCAGCACTGG	508	3	n	4.6e-05	+++++ +++ +++
chr7:99534935-99536481	601	CGCAGAGCCGCGCACGGAGGCATACACGCGCGCTCACACCCGCACGCTCCACGCCCCTGGCGGCGGCCTGGGCGC	613	3	n	8.5e-06	+++ + ++ ++++
chr7:99534935-99536481	601	CGCAGAGCCGCGCACGGAGGCATACACGCGCGCTCACACCCGCACGCTCCACGCCCCTGGCGGCGGCCTGGGCGC	635	3	n	3.7e-05	+++++ + +++ + +
chr7:99534935-99536481	676	TGTGCTGCTCGAGCGACgggcggggacccgggcgggggcggcggcggcgacagcggaggaggcggagcggggtag	733	2	y	3.5e-05	++++++ +++ ++
chr7:99534935-99536481	1126	ACAACACACAAGCTCATAAACACATGAGCACCCTTCTGCAGGCACACACTGACAGTCGTTGCCACACTTCGCATT	1134	3	n	4.6e-05	++ + ++ + ++++
chr7:99534935-99536481	1276	TAGCATACACAGGTCCCACTCGAACACGCACCAGCTCTAACAACACCCTCGTGTTGCTACACACATGCGGGCATA CACCGACATACGTAGCCTGGCACTTGGGTGCTGCAAAGCACGGTCTAAGCTAGTACGTGCAGTCTGTCAACCCTC	1339	3	n	2.2e-05	++ + ++ ++++
chr12:31997030-31997273	76	aggaagtcgagaatctgtcaaataatATCTGGATGGATAGTGCCTGTGacacacacacacacacacacacacaca cacacacacacacacacacacaGGATATATCATTAGCTAATATAGCTCACACACTTTAATTGGATAGGCCACAAC	125	3	n	7.7e-10	+++++++++++++++
chr12:31997030-31997273	76	aggaagtcgagaatctgtcaaataatATCTGGATGGATAGTGCCTGTGacacacacacacacacacacacacaca cacacacacacacacacacacaGGATATATCATTAGCTAATATAGCTCACACACTTTAATTGGATAGGCCACAAC	141	3	n	7.7e-10	+++++++++++++++
chr12:31997030-31997273	76	aggaagtcgagaatctgtcaaataatATCTGGATGGATAGTGCCTGTGacacacacacacacacacacacacaca cacacacacacacacacacacaGGATATATCATTAGCTAATATAGCTCACACACTTTAATTGGATAGGCCACAAC	157	3	n	7.7e-10	+++++++++++++++
chr5:134965691-134966585	76	AACACTGGAAGGAGAGGCACCGGGCGTTAGAACAGGTTGCTAAGGCACCTACAAATTGACTGCGCATGTAGAGAA	82	2	y	7.3e-05	+++ + +++++++
chr5:134965691-134966585	451	CTGCAGCTTGGCCCACTtgcgcgcgcgcgagcgcgcgtgcgtgtgtgtgtgtgtgtgtgtgtgtgtgtgtgtgtg	491	3	y	7.7e-10	+++++++++++++++
chr5:134965691-134966585	451	CTGCAGCTTGGCCCACTtgcgcgcgcgcgagcgcgcgtgcgtgtgtgtgtgtgtgtgtgtgtgtgtgtgtgtgtg	507	3	y	7.7e-10	+++++++++++++++
chr3:137864197-137865868	1	GGGGGAGTGGAGGGGGGGAGGCTGCAGCGGGGAGGACGCCAGCGCGCGCTCCTCCCCAGCCTTCCAGCTCCTCCC TCCAGGCACGTGACACCACCGTCCACTCGCTCGGTGGCGCAGCGCTCTGTTGCTGCCCTCCCGCCGCGGCGCCCC	17	2	y	7.8e-05	++++++ + ++ ++
chr3:137864197-137865868	1	GGGGGAGTGGAGGGGGGGAGGCTGCAGCGGGGAGGACGCCAGCGCGCGCTCCTCCCCAGCCTTCCAGCTCCTCCC TCCAGGCACGTGACACCACCGTCCACTCGCTCGGTGGCGCAGCGCTCTGTTGCTGCCCTCCCGCCGCGGCGCCCC	64	2	n	2.1e-05	++ ++ ++ +++++
chr3:137864197-137865868	1276	CATTTTTTTTCTTGTTTGTTCGTTTGTTTGTGTGCATAAAAATCAAGTTCCCTGTGGGCCGTATTCATCGACACC	1278	1	y	1e-06	++++++++ ++++++
chr3:137864197-137865868	1276	CATTTTTTTTCTTGTTTGTTCGTTTGTTTGTGTGCATAAAAATCAAGTTCCCTGTGGGCCGTATTCATCGACACC	1299	3	y	1.6e-05	+++ ++++++ +
chr3:137864197-137865868	1426	TCACCGCAGAGGTAAGCGGGAGTACGCCTGTGATCTGGAAAAGCTCTGGGGGGGCGGGGGAAAGTGGCGAGAGAG	1475	2	y	8.3e-05	++ +++ + ++ + +
chr3:137864197-137865868	1651	GGGTGGTTTTTTTTTTTTTTT	1657	1	y	3.7e-09	+++++++++++++++
chr19:60226397-60226875	151	CCCCGACTCCTGCGCCGCCCTCCCTGCCTCGGAACACAGCCCGACAGGCCGCCGCGAATCCTGCCGCCAAGTCGC	159	2	n	6.5e-05	+++++ + +++++
chr19:60226397-60226875	376	CTTGCCTAAACGCCTCTGCTAAGAGGAGCCTGTTGAGGTTTTGTTtttgttttttgtttgtttgtttgtttgttt gtttgtttgtttgtttTTCTCCTTTTCC	428	1	y	4e-08	+++ +++++++++++
chr19:60226397-60226875	376	CTTGCCTAAACGCCTCTGCTAAGAGGAGCCTGTTGAGGTTTTGTTtttgttttttgtttgtttgtttgtttgttt gtttgtttgtttgtttTTCTCCTTTTCC	444	1	y	4e-08	+++ +++++++++++
chr6:47748455-47748661	76	gtgatcctcctgcctctgcctccttcagcaaatcctaccggcgtgcgccaccactaccggcAGCGAACGGGCGCT	84	2	n	4.3e-10	+++++++++++++++
chr4:88550320-88550560	1	GGCTCCTAGGACGTAGGCTCAGTCAGGTGACGCGCAGTCAGCAGGGGGCGCGCTCCCATTCACTGCTCAAGGATG	13	2	y	8.9e-05	+ ++++ ++ ++++
chr4:88550320-88550560	151	TCCTCGAGACACAAATTCAAAACTGTGTAGAGCAGTTTTTTGTTTTTGTTTTTTTGTTTTATTAAGAACTTTTGC	195	1	y	1.8e-08	+++ +++++++++++
chr16:44358063-44358265	151	AGATTATATAACTCCTTGGCCTGGgtttgtttgtttgtttttgtttgtttgt	176	1	y	4e-08	+++ +++++++++++
chrX:136741303-136742163	151	GCTAGCAACCTGCTTCTTCATGCTTAGGGCCGACTGCAAACCAATTAGCATCCTTCTTCAGTGAGGGCTCCCGCC	159	2	n	7.3e-05	+++++ +++ + + +
chrX:136741303-136742163	301	CAGCGCGTTCACGTGGCCCGTCTTCACGACCCAGAGTTCCCCTGACCGTGGGTTTTTTTTTTCCCCCCCTCGCGC	348	1	y	2e-05	+ ++++++++++
chrX:136741303-136742163	526	GGCAGACCCGGGGCCACGCCCCCGAGCCTGTTGCGCAACTCGCGGACCTGGGGAGAGAGGAAAAAAAAACACCAA	586	1	n	4.4e-07	+++++++++ + ++
chrX:136741303-136742163	676	CACTGGGCGGATGCCTGGATGCTTTGGAGAAACGGGGTGTCTGCGCGCACGCGGGCGCAGGCAGGCTCGCGTGGC	726	2	y	8.3e-05	+ +++ +++++++
chrX:136741303-136742163	751	TGTGGAGTGTGGGTGTGGGCGCACAGCCGCCCTCGTGGCGCTGGCGATGATGGGTGTGCGCAGGCGTGCTGCCCT	757	3	y	1.5e-05	+++++ +++++ + +
chrX:136741303-136742163	751	TGTGGAGTGTGGGTGTGGGCGCACAGCCGCCCTCGTGGCGCTGGCGATGATGGGTGTGCGCAGGCGTGCTGCCCT	804	3	y	1.6e-05	+++++ + + +++
chrX:136741303-136742163	826	GGTGGGGACGGGAGGGGCCgtgtgtgagtgtgtgt	845	3	y	3e-07	+++++++ +++++++
chr17:46857251-46857794	301	ccgccgtcactccaggccctccctcgccccctgctcgccgccccgccgcgccgccgtcctcccctcgccgagccc	318	2	n	2.4e-05	+++ ++++ ++ +
chr17:46857251-46857794	376	cgctccCTCCTCCGCGGCTCCCCGGGCGGCTCCGGGGGGCggaatacacacacacactcggcgcgcacacacaca tacacacacacactcggcgcacacaactaattTGAAAGCGGCTCAATCAATGAGTCATTAAAAGGCTCCCCTCCC	420	3	n	7.2e-07	++++++++++++ +
chr17:46857251-46857794	376	cgctccCTCCTCCGCGGCTCCCCGGGCGGCTCCGGGGGGCggaatacacacacacactcggcgcgcacacacaca tacacacacacactcggcgcacacaactaattTGAAAGCGGCTCAATCAATGAGTCATTAAAAGGCTCCCCTCCC	445	3	n	1.7e-09	++++++ ++++++++
chr17:87571742-87571942	76	GGATGAATGTGGGATGGCAGGTAGCAAAATGTTTCTGCCCCACCCTTCATTCCACAAGGACAGGGAAACTCCGAG	109	2	n	1.3e-05	+++++ + +++ +
chr17:87571742-87571942	151	CCTGCTCAGGAGGCTGTTTTGTCCCTGATACTaaaacaaaaacaaaaaca	184	1	n	5.1e-08	+++++++++ +++++
chr12:91588356-91588697	76	CACCTTCCCATCCTGGCAGAGTCTATATTAGAGAGCGGCAATGGCTCTATATAAACAGGGCAGCCAAAGGGAGGA	135	2	y	5e-05	+ ++ ++ +++ +++
chr12:91588356-91588697	226	TATAGTGTCGGGCAGCCGCAGGCTGCTCTGCGGCGTTTGGGACCGGGCAAAATGaaaaaaaaaaattttttttaa	275	1	n	2.2e-06	+++ ++++++++++
chr12:91588356-91588697	301	aaataaaCAAACAAAAAAACAAATATTGTGCTTTATTGTCA	305	1	n	1.5e-08	+++++++++++++++
chr5:123093448-123094433	1	TAGAGAGCTATCTTGGCCCTGCCTTCCCTCTGACATCTTGGAGCCTTTCCTTTGTTACCCACACGCTTGGAATCA	12	2	n	2.7e-05	+ ++ + ++++++ +
chr5:123093448-123094433	226	AACTTACTAATTGCAAATAGCAAAAGTTGATCACTTGggtgctggagagatggctcagaggttaagagcactgcc tgttcttccagaggtcctgggttcaattcccagcaaccacatggtggttgacaaccatctgtaatgagatctgat	295	2	n	7.3e-05	++++++ + + +++
chr5:123093448-123094433	376	gccctcttctggtgtgtctgaggacagctacagtgtacagtatataataaatattaaagaaaaaaaaaaAAGATG	431	1	n	8.7e-07	+++ +++++++++++
chr5:123093448-123094433	676	cccagcactcaggaggcagaggagttcaaaagttgaagttcTAGGTTGAAGAAACACACACACATACTCACATGC	730	3	n	2.7e-07	++++++++++ ++ +
chr14:21813011-21813553	151	ATCTTTAAAGTATTTGTTATTACATTTTACTTCgtgtgtgtgtgtgtgtgtgtgtgtgtgtgtgtgtgtgtgtgt gtgtgtgtgtgATGGTGTCTCcatgtggaggtcagaggacaacaagtggaagtttcttctctctttccaccaata	184	3	y	7.7e-10	+++++++++++++++
chr14:21813011-21813553	151	ATCTTTAAAGTATTTGTTATTACATTTTACTTCgtgtgtgtgtgtgtgtgtgtgtgtgtgtgtgtgtgtgtgtgt gtgtgtgtgtgATGGTGTCTCcatgtggaggtcagaggacaacaagtggaagtttcttctctctttccaccaata	200	3	y	7.7e-10	+++++++++++++++
chr14:21813011-21813553	151	ATCTTTAAAGTATTTGTTATTACATTTTACTTCgtgtgtgtgtgtgtgtgtgtgtgtgtgtgtgtgtgtgtgtgt gtgtgtgtgtgATGGTGTCTCcatgtggaggtcagaggacaacaagtggaagtttcttctctctttccaccaata	216	3	y	7.7e-10	+++++++++++++++
chr17:24617684-24618257	76	ggggaggttggcggcagagacaggaggatccctatcagctcctaggcctactggcctatagtagtcagcggtaaa	85	2	y	1.5e-07	++ +++++++ ++++
chr17:24617684-24618257	226	TGGCAAGAGTGTGTCTATCCTCACACACACAAACTAATGTATGGACACACACATGAACACACTACAAGAAAAGCT	247	3	n	5.5e-06	++++++++++ ++
chr17:24617684-24618257	226	TGGCAAGAGTGTGTCTATCCTCACACACACAAACTAATGTATGGACACACACATGAACACACTACAAGAAAAGCT	271	3	n	7.7e-07	++++++++ ++++
chr17:24617684-24618257	451	tgaaaagcaacgaagctctgatacacgccatagcgtggatgCTTGGTGAAAGCCAACCACAGAGGCCCACATGCG	508	3	n	6.6e-05	++++ + + ++++
chr19:53273503-53273801	151	atccatcatctagtgagaaagtaaggtgcagccaggcgtgctgacatggctacttgggaggcagaggcaggagaa	207	2	y	4.3e-10	+++++++++++++++
chr11:82952166-82952926	226	GGTGTTGAAGGCTTGGGAAGGGAAGTCCCGGGGAAGGTGGCCGAGTGAGGAGAGGGACCTATCTCGGGGAGGAGA	261	2	y	7.8e-05	++ +++ +++ +++
chr11:82952166-82952926	601	GGTGTACTGTCTGAAGTTCTCCAAAGCTGGGTTTGTCGTGCCTGGGAAATAGAAACTGATCCCTAAtgtgtgtgt gtgtgtgtgtgtgtgtgtgtgtgtgtgtgtgtgtgtgtgtgtgtgGTGGGGAAGTGGGAGAGGGGAATAGGCAGG	668	3	y	7.7e-10	+++++++++++++++
chr11:82952166-82952926	601	GGTGTACTGTCTGAAGTTCTCCAAAGCTGGGTTTGTCGTGCCTGGGAAATAGAAACTGATCCCTAAtgtgtgtgt gtgtgtgtgtgtgtgtgtgtgtgtgtgtgtgtgtgtgtgtgtgtgGTGGGGAAGTGGGAGAGGGGAATAGGCAGG	684	3	y	7.7e-10	+++++++++++++++
chr11:82952166-82952926	601	GGTGTACTGTCTGAAGTTCTCCAAAGCTGGGTTTGTCGTGCCTGGGAAATAGAAACTGATCCCTAAtgtgtgtgt gtgtgtgtgtgtgtgtgtgtgtgtgtgtgtgtgtgtgtgtgtgtgGTGGGGAAGTGGGAGAGGGGAATAGGCAGG	700	3	y	7.7e-10	+++++++++++++++
chr11:82952166-82952926	601	GGTGTACTGTCTGAAGTTCTCCAAAGCTGGGTTTGTCGTGCCTGGGAAATAGAAACTGATCCCTAAtgtgtgtgt gtgtgtgtgtgtgtgtgtgtgtgtgtgtgtgtgtgtgtgtgtgtgGTGGGGAAGTGGGAGAGGGGAATAGGCAGG	736	2	y	4.1e-05	+ ++ + +++++++
chr5:140731241-140731420	1	CTGCCTAACCCTTGATGGTGTGGGAAGGGGAAACAGACACTTCCCtttttttgagacaaggtttctttgtatagc	23	2	y	5.3e-05	+++ + ++ +++
chr5:140731241-140731420	76	cctggttgccctggaactcactttatagaccaggctgccttgaactcacagagatccgcctgcctctgcctcccg	134	2	n	4.3e-10	+++++++++++++++
chr7:44572482-44572745	1	cacacacacacacacacacacatacacacacGTCACTTCTGTGTTCCAGTAGGTGGTGGGGCGTGAACAGGGTGG	1	3	n	7.7e-10	+++++++++++++++
chr7:44572482-44572745	1	cacacacacacacacacacacatacacacacGTCACTTCTGTGTTCCAGTAGGTGGTGGGGCGTGAACAGGGTGG	17	3	n	1.7e-09	++++++ ++++++++
chr15:79658040-79659354	151	acagagaaaccctgtctcgaaaaaaacaaacaagcaaacaaacaaacatacaaacaaacaaacaaacaaaaaaac	174	1	n	8.7e-07	++++++++++ +++
chr15:79658040-79659354	151	acagagaaaccctgtctcgaaaaaaacaaacaagcaaacaaacaaacatacaaacaaacaaacaaacaaaaaaac	193	3	n	5.9e-06	++ +++ +++ +++
chr15:79658040-79659354	151	acagagaaaccctgtctcgaaaaaaacaaacaagcaaacaaacaaacatacaaacaaacaaacaaacaaaaaaac	210	1	n	1.5e-08	+++++++++++++++
chr15:79658040-79659354	301	TTTTGATGTGGAATTCTCTCTTCGAACGCTGTGTGGCAAAGGTGGAGGAAGACTGCTTGGAGCTGGGTCCTGTCC	338	2	y	7.8e-05	+++ ++++ ++
chr15:79658040-79659354	901	ACCCGGGGACCAGACCAACGTATTTAGGGGGTCATGCCTCTCCCAGCCTATGCCACAAGGCATGTGTGTATCTCC	937	2	n	6.9e-05	+++ + + ++++
chr15:79658040-79659354	1051	AGTCCGCAGGGGCTCCGCTGCTTCGCGGAGGCTCGTCTCGGAGCTGGCTCCCTCTGCATTCTCAGTGGTAGAAGC	1097	2	n	3.3e-05	++ +++++++ + +
chr18:36734910-36735261	151	CTGTTGCGGGCAGTAGACTGTTTTTGTTTTTGTTTTTCTGGCCTCCCGGTTTTGTTTAGCGCCTGCGCAGTCCCA	171	1	y	5.1e-08	+++++ +++++++++
chr18:36734910-36735261	301	TTTGGGGTGGAGGAGCTGCGGCGCCGCCGGCGGGAGCGGGAGGCAGGTGTG	333	2	y	3.9e-06	++++ ++++++++
chr12:100110089-100110402	1	GGTCCCGATAGGCTTCCGTAGCCTGttttttttttttttttttaaaGTTACTTCCGTTCTGTCCGGGTCGCTTTG	26	1	y	3.7e-09	+++++++++++++++
chr7:19736676-19736760	1	gtgtgtgtgtgtgcatgcgtatgtgtgtgtgtgtgtgtgtgtgtgcatgcgtgcgtgcgtagatgcctgtgtgtg tgcatgcgt	3	3	y	2.7e-08	+++++++++++ ++
chr7:19736676-19736760	1	gtgtgtgtgtgtgcatgcgtatgtgtgtgtgtgtgtgtgtgtgtgcatgcgtgcgtgcgtagatgcctgtgtgtg tgcatgcgt	23	3	y	7.7e-10	+++++++++++++++
chr7:19736676-19736760	1	gtgtgtgtgtgtgcatgcgtatgtgtgtgtgtgtgtgtgtgtgtgcatgcgtgcgtgcgtagatgcctgtgtgtg tgcatgcgt	39	3	y	7e-08	+++++++ ++ +++
chr7:19736676-19736760	1	gtgtgtgtgtgtgcatgcgtatgtgtgtgtgtgtgtgtgtgtgtgcatgcgtgcgtgcgtagatgcctgtgtgtg tgcatgcgt	67	3	y	9.7e-07	++++++++++ ++
chr14:72709774-72710187	301	tggacccggagcccccgcgcgcgcacacacacacacacacacacacacGAGCTCGAGCGCGCGCACCCGAACCCG	324	3	n	7.7e-10	+++++++++++++++
chr14:72709774-72710187	301	tggacccggagcccccgcgcgcgcacacacacacacacacacacacacGAGCTCGAGCGCGCGCACCCGAACCCG	340	3	n	1.5e-05	+++++++++ + +
chr9:75409765-75410387	1	CACACACAATGGACGCGGGAgccggcgccgccgccgggccctctgccgctccctcccgcgccggcccgcacccgg	42	2	n	1.1e-05	+++++ ++ +++++
chr9:75409765-75410387	76	ccACACACACATACACACTCACGGGACTTCTCCGACTCATCGACAGAGTGCAGGGCCCGCGGACAGCCCTCAAGG	77	3	n	3.3e-09	++++++++++ ++++
chr1:132390420-132390611	76	GGACAAACTGAGCTTCGTTCAGGAAGATGCTCaaaaaaaaaaaaaaaaaaaaaaaTCCGCACTCGGAGGAGGCTA	108	1	n	3.7e-09	+++++++++++++++
chr6:116228964-116229164	151	TGTGGAAGAGAAGAAgtgtgtgtctgtgtgtctgtgtgtctgtgtgtgtg	166	3	y	8.8e-09	++++++++ ++++++
chr6:116228964-116229164	151	TGTGGAAGAGAAGAAgtgtgtgtctgtgtgtctgtgtgtctgtgtgtgtg	186	3	y	4e-08	++++ ++++++++++
chrX:159627232-159627705	1	TCGGGCGGGCGGAGCCGCTGAGCTTCGCCGCGGCGGGGAGGAGGGGAGAGCAGGCTCCGAGGCGGCTGCAGGGCA	40	2	y	5.7e-05	+++++ +++++
chrX:159627232-159627705	76	CTGGGCTGGGCGGTGCtttttttcttttcttttcttttctttctttctttttttttcttcttcttcttctttttt tttttttttCGCAATTTCCACTCGCAGAGAGCAGGAAACCCGGAGCAGCCGGGTGCAGTGGGGCCGCGATgcagc	94	1	y	1.9e-05	+++++ ++++ ++++
chrX:159627232-159627705	76	CTGGGCTGGGCGGTGCtttttttcttttcttttcttttctttctttctttttttttcttcttcttcttctttttt tttttttttCGCAATTTCCACTCGCAGAGAGCAGGAAACCCGGAGCAGCCGGGTGCAGTGGGGCCGCGATgcagc	115	1	y	6.7e-06	+++ +++ +++++++
chrX:159627232-159627705	76	CTGGGCTGGGCGGTGCtttttttcttttcttttcttttctttctttctttttttttcttcttcttcttctttttt tttttttttCGCAATTTCCACTCGCAGAGAGCAGGAAACCCGGAGCAGCCGGGTGCAGTGGGGCCGCGATgcagc	145	1	y	3.7e-09	+++++++++++++++
chrX:159627232-159627705	226	agcagcagcagcaggagtcgccccagggtagcagcggcagcagcagcagaggcagtagcGGGCGGCGCTGAGCTG	267	2	y	1.8e-05	+ ++++++++++
chr8:57652096-57652969	76	CCCGGCCACGGGAGTTGCGGAGAGGCGGCGCCGTGGGCTGGAGCCCGAGGCGGACAGGCTAGGGGCGCCCCCGCG	115	2	y	2.9e-05	++++ + +++++ +
chr8:57652096-57652969	451	cagcagcagcagtagcgcgggtgacggcgctgaacccggggcggggacgcgcgggaggaaggggcggccaggggg	504	2	y	7.3e-05	+++++ ++ +++ +
chr8:57652096-57652969	601	ACCTGCGGAGCTGCGGCGCCCACGCGGCCGCGACCCCGCCGCCCCTTGCTCCCGCcacatacacacacacacaca cacacacacacactcacGCGCGCGCGCAAAAAAACAAGTTGCAGGTCGCCTCTGCCGGAGGGGGCCAGGCGGGTC	662	3	n	7.7e-10	+++++++++++++++
chr8:57652096-57652969	601	ACCTGCGGAGCTGCGGCGCCCACGCGGCCGCGACCCCGCCGCCCCTTGCTCCCGCcacatacacacacacacaca cacacacacacactcacGCGCGCGCGCAAAAAAACAAGTTGCAGGTCGCCTCTGCCGGAGGGGGCCAGGCGGGTC	678	3	n	5.1e-08	+++++++++++ +++
chr7:80947496-80948008	301	GCCCTTGGACAGGCCTGGCCAATCGGAAGCCGAGTCTGCGCCAGCGCGAAGTCGGTGTCTTCCTGCGTGCTGCTG	355	3	y	5.7e-05	++++ + ++ +++
chr7:80947496-80948008	451	AGCTGTGTGTGTCTTTTAAAGCATTGTATacacacacacacacacacacacacacacacaca	481	3	n	7.7e-10	+++++++++++++++
chr7:80947496-80948008	451	AGCTGTGTGTGTCTTTTAAAGCATTGTATacacacacacacacacacacacacacacacaca	497	3	n	7.7e-10	+++++++++++++++
chr2:26351995-26352260	76	ATTTTGGTAACGGGCGCAGCGGCCGGAAGCGGCCCTCTTCGGCTTCCATCCGCCACCGGTGCACTGCTTTCTGTT	108	2	n	8.3e-05	++ + ++ ++ +++
chr2:26351995-26352260	151	GCCCCCTGGTGTCGCCCCGCTTGCATATCCAACCAACAGGCTCAGCTCGGTGATTATTTTATTTAGTTGCATTTT	204	1	y	1.9e-05	++ ++++ +++ ++
chr2:26351995-26352260	226	CTAATTCTAATACAGTaaaaaaaaaaaaaaaaaaaaaaaa	242	1	n	3.7e-09	+++++++++++++++
chr1:132355968-132356208	151	TCATTTAAGTTGCTCAGAGCAAGGCAGgtgagtgtgtgtgtgtgtgtgtgtgtgtgtgtgtgtgtgtgtgtgtgt gtgtTCCTCATTCAG	182	3	y	7.7e-10	+++++++++++++++
chr1:132355968-132356208	151	TCATTTAAGTTGCTCAGAGCAAGGCAGgtgagtgtgtgtgtgtgtgtgtgtgtgtgtgtgtgtgtgtgtgtgtgt gtgtTCCTCATTCAG	198	3	y	7.7e-10	+++++++++++++++
chr1:132355968-132356208	151	TCATTTAAGTTGCTCAGAGCAAGGCAGgtgagtgtgtgtgtgtgtgtgtgtgtgtgtgtgtgtgtgtgtgtgtgt gtgtTCCTCATTCAG	214	3	y	7.7e-10	+++++++++++++++
chr1:182124612-182125396	1	TTGGAAAGGCAGCACAGGCACTATCCCCTCCAGCCCTGCAGGCGGCGCTGTGGCAGCCGCCCTCTCCTCTCCCGA CCTCTCAGAGCGGAGGCCCCGCCCCCCGACATCACGCCTCCTGCCCATTGGACAGGCGCGCGGCCGAGGCTGGCC	66	2	n	6.1e-05	+++ + + ++++
chr1:182124612-182125396	451	CGGTGCCACTGTCCCTTCGTCTGCTTCCGACTGACCCGGAGACCCAGTGACCCAGCGAGGCGACCCCAGCAGCTA	464	2	n	7.3e-06	+++ + +++++ +++
chr1:182124612-182125396	751	CACCTGCTCTACTTTTTTTTTTTTTTTTTTGGAT	763	1	y	3.7e-09	+++++++++++++++
chr3:22143429-22143594	1	AGGCTGCTTCTCAGATCTTCCTGCAGGGGGAGCTACCCTCACCTCATCGTATGCTTGGTGTCTGGTAAGCtgcgt gtgtgtgtgtgtgtgtgtgtgtgtgtgtgtgtgtgtgtgtgtgtctgtAGCACTGTGTGTGTTGGGGGAGGGTTC	74	3	y	7.7e-10	+++++++++++++++
chr3:22143429-22143594	1	AGGCTGCTTCTCAGATCTTCCTGCAGGGGGAGCTACCCTCACCTCATCGTATGCTTGGTGTCTGGTAAGCtgcgt gtgtgtgtgtgtgtgtgtgtgtgtgtgtgtgtgtgtgtgtgtgtctgtAGCACTGTGTGTGTTGGGGGAGGGTTC	90	3	y	7.7e-10	+++++++++++++++
chr3:22143429-22143594	1	AGGCTGCTTCTCAGATCTTCCTGCAGGGGGAGCTACCCTCACCTCATCGTATGCTTGGTGTCTGGTAAGCtgcgt gtgtgtgtgtgtgtgtgtgtgtgtgtgtgtgtgtgtgtgtgtgtctgtAGCACTGTGTGTGTTGGGGGAGGGTTC	108	3	y	4.4e-07	++++++++++++ ++
chr10:41303076-41304066	1	CACAGGGCACCAGGCCGCGGCCCAGGTCGTGACAGCGGCGGGGTTCCCCCTGGAGACAGAGCGAGGAGACCCCGC	52	2	y	1.7e-06	++++ +++++ +++
chr10:41303076-41304066	226	GGTTGCTGAGGGCGGACGCTAAGGGTGCCATCTTTCTTAAGGGCAGGCaaaaaaaaaaaaaagaaagaaagaaaa	276	1	n	8.2e-08	++++++++++++ ++
chr10:41303076-41304066	901	ATAGCTGCTGTCGCGTCCCCGGTCCACAGGTAAGCAGAGGCAGGGAATTGTCCACATTCTGGGTGCATTTTGCCA	930	2	y	2e-07	+ + +++++++++++
chr11:95336656-95337216	76	TTCTCATTGGCAGTGCTGAAGAACCAGCCCTCTACTGGAAGGTCCAATCGGCAGCCTTAAGGACATTaaaaaaaa aaaaaaaaaagaaaagaagaaaaTCAGGAGGGTGGGGGTCTTGACTTGATGGCTGAGCACATGGACCAATCATCC	143	1	n	3.7e-09	+++++++++++++++
chr11:95336656-95337216	376	CGTGGGGGTGAGGCGGCAGGTAGCCGGGTGGGCCATGTCCGGGGCCGCAGCGGGCGGCCGAGGCGGAGGTTCCTg	428	2	y	2.7e-05	++ +++ +++++ +
chr5:110810086-110810454	151	TGGTGCCTCGATGGGCCCAGCCCTATACTGGGCGGGACTTGAGAGAGGAGGCAGGATATGGGCGGGGCCGGAGCA	191	2	y	5.3e-05	+ + ++++++++
chr5:110810086-110810454	226	GACTGGGCATGTCAATGTCAGAACTATCTCTGGTTGTGGCTCCTCGCTCTGCCCTAGGCATTTTtttatttactt	286	1	y	1.7e-05	+++++++ +++ ++
chr5:110810086-110810454	301	attttattcatatgtatatgtgtgtgcctacaggagtttatatgcaccgtgtatgtgtatataaacac	312	3	y	1.9e-07	+++ + ++++++++
chr5:110810086-110810454	301	attttattcatatgtatatgtgtgtgcctacaggagtttatatgcaccgtgtatgtgtatataaacac	347	3	y	5.4e-05	++++ +++++ +
chr2:172401186-172401434	1	AGTCATCTTGAGCAGTGGTGAGTAAGAGGGGAAATGACAGCGGCCCAGAGGGGAAATCACTCAGAAAAGGAGGAA GGTGGAGGCTGCTAAGAAAGCTGCCTCTGAGGAGGAGGCCACTCTCCAACATGAGTTGCAAAAAAGGGGAACTAC	69	2	y	7.3e-05	+++++ ++ + +++
chr2:172401186-172401434	151	AGTTTCTTTGTTTTTTTGTTTTTTCTTACTCATGAGCCATGTACTCAGCCCAGAGTTTTGCTGTGAGCTCAGCAC	157	1	y	1.8e-08	+++ +++++++++++
chr4:49631709-49632169	1	TTGGGAGATGGACAGGACCATCAACCAATTAGCAGCTTGGATGAGATAGGACCGCCCCCCCAACACAAAACATAA ACAAAACGCTTTCCGTCAGTAATAATAATGGACCTTAAAAAAAAGAAAACAAAAAACAAAAAAACCGTACACAAT	67	1	n	8.2e-06	++++ + +++ ++++
chr4:49631709-49632169	1	TTGGGAGATGGACAGGACCATCAACCAATTAGCAGCTTGGATGAGATAGGACCGCCCCCCCAACACAAAACATAA ACAAAACGCTTTCCGTCAGTAATAATAATGGACCTTAAAAAAAAGAAAACAAAAAACAAAAAAACCGTACACAAT	122	1	n	9.7e-08	++++++++++ ++++
chr4:49631709-49632169	151	GCTTCGCGTTGAAGAGACCGGTCACTTTGGGACTGGAGTCTGAAACAGTCCCCGCCCATCCCAACACAGAGGCGG	185	2	y	8.9e-05	++++ + ++ +++
chr4:49631709-49632169	301	CGCCCTCTCCTCGCCGTGCCTCGGGTAAAGTTGAAGCAACTTCCTTTTCCTTTTCCCTACTTCCTCTCCGTGCCT CCGCCTCCGTGGAGCTCAGTCCCTCTCGCAGCGGATCCCAAGTGAATCCCTTGGAGTCCCTCTCGGGCCTTCGTG	369	2	n	1.1e-06	+ ++++++ ++++++
chr6:83395715-83396194	1	ATGCTGTGCCTCTGGGCCAGGGAGGGGACACCACTCTGCAAGGCTGAGATAGGCTACATGTACTGTGCATCAGCA	39	2	y	3.8e-05	++++ +++ +++
chr6:83395715-83396194	226	TTTTATATTTCCTATTTTTGCCACCACACCACCCCTAACAGTACCGCGGCAGTTAGGGAGGAGGGATTAGTGCGT	236	2	n	7.8e-05	+++ + ++++ ++
chr6:83395715-83396194	301	CTGGAGTTTCTTCCATCTCCTTCACCATCTGCTTTTGGGAGGTGTCCTTGTGGGTGTGCTTCCCTCTCTGCACTG	342	3	y	7.3e-05	++++ ++++ +++
chr6:83395715-83396194	376	GACTTAACGTCAGcaggcagtggcagtgcacgcctttgaccccagcgttcaggaagcagaggcaggcagatctcc	427	2	y	3.5e-09	+++ +++++++++++
chr13:3537695-3538254	151	GCTTCGCATGTCGCCGCCCATACCACAGGAGCACAAGACGGGTGAAATTTaaaaaaaaaaaaaaaaaaaaaGCGC	201	1	n	3.7e-09	+++++++++++++++
chr13:3537695-3538254	226	AAAACCGGAAGCCAAGATGGCAGCAGTCCGCCCTTCTCTCGCGAGAGGGGAACGAGGGGGGGAGAGGTGGGGTTA	282	2	y	1.4e-05	++ ++ +++++ ++
chr13:3537695-3538254	376	GCCGGAGCTCGctctcctcaccccgcgctctccccgcctcccctccctcccctccctgctcttctcttcccGTTG	417	2	n	2.7e-05	+++ ++++ + ++
chr9:71166167-71167359	151	GTTCAGAGAGATGACCAATGGAGCCATTAGGACTGACCGGGAGAGAGAGTGAAGAGCCTAGAAATAGAGATTTCA	190	2	y	6.5e-05	++++ ++++ + +
chr9:71166167-71167359	301	CACCAAGCAAAACCTCCCAAGTACTCTAAGAGGGGTAAGTAGTGTACATCTGTCTCTCTGCCCTTCCTCCATCTT TATGGAAACACTCTCCCCTTTAATGTTCTAAATGGATGCATGGGGCTACTGGTAATTTCCATCCATGCAGCCATT	362	2	n	8.3e-05	+++ ++++ ++
chr9:71166167-71167359	526	AGCCAATCTATACCATCCCAGCCATCCTTTTACATCATGCCccatccatccattttccaccctcttcatccctct	582	2	n	5e-05	++ +++++ + +++
chr9:71166167-71167359	751	TGAAAAGCTTCTGCAAAGGACTGCCCCACCCAATAAAATGGAGGTACACTGAGTCAAAACCCCACAGACAGACAC	811	3	n	2.9e-05	+ ++++ +++ ++++
chr9:71166167-71167359	976	CATGAGATCGCCAGTTGTCCACAAATCAGACCCCACCCCCCATACCCTGACGTCACttttttttttttttttttt	1032	1	y	3.7e-09	+++++++++++++++
chr7:16294896-16295793	301	GTGGGTGTTTCTTGCAAAATAAAAAAGAAAGTGAATTCGGAGCCTAGCGGTGGGATGGAGAGAAAGAGAGGTGGG	316	1	n	3.8e-06	++++ ++++++ +++
chr7:16294896-16295793	301	GTGGGTGTTTCTTGCAAAATAAAAAAGAAAGTGAATTCGGAGCCTAGCGGTGGGATGGAGAGAAAGAGAGGTGGG	357	2	y	1.2e-05	++++ + ++ +++
chr7:16294896-16295793	376	GAGGAAGGAAAGGAGAGACATGAATGAGAAAGACTTTTGTGAGCGACAAAGACAGAAATTGAGGCGGACGTTGGA	383	2	y	5.7e-05	+ + + ++++ ++ +
chr7:16294896-16295793	376	GAGGAAGGAAAGGAGAGACATGAATGAGAAAGACTTTTGTGAGCGACAAAGACAGAAATTGAGGCGGACGTTGGA	417	2	y	6.5e-05	+ + ++ ++ +++
chr7:16294896-16295793	526	CGGCAACAGGAACCAAGCAAGTGGCAAGGATGCTGAGGCAGGACAGGCTATGGGCGCGGTGGGGACCGTAGGGAC	553	2	y	1e-07	+++ ++ ++++++++
chr7:16294896-16295793	826	CACCACTGTCCCGCGGACACGCGGAGTTCTTCTACACGGCAacacacacacggagaccgtcccacacccaca	868	3	n	3.2e-05	+++++++++ + ++
chr11:49243800-49244559	1	AGAGGCAGGGCAGCCACGCAGGTCCCGCCTCCACTTTCCGCCCTAGTTCCTGCCACCTCTGGCAGCCAGAGCGTC	24	2	n	4.1e-05	++ +++++ + + +
chr11:49243800-49244559	226	GGGCCTTCTGCAACGCCCGCCCTCCACCTCGTGAACACTGCACAACTGGCCCAAGCGTGCAGACACACCTCCCGC	281	3	n	6.9e-05	+ ++ ++++++
chr11:49243800-49244559	676	AGGAGTTAAGTTCTTGGGGGGTGGGGGGTGTCATGTGTCGGCCACGCCCCTACAGGAAGAGGGGTTCAtgtgtgt gtgtgtgtg	745	3	y	7.7e-10	+++++++++++++++
chr12:17000005-17000574	151	gcccgtgcgccccgcccagagtctgctccgctcggagcgcaccccgccccagtctgctccgctccTAGCGCACCC	193	2	n	7.3e-05	++ +++ + + ++ +
chr12:17000005-17000574	451	TCGCAGAGTGGAAACGCCCGAACAGACTAGCCTTCTCCGGGGTTAGGTGGGCCCAGGGCCTacacacacacacac acacacacacacacacacacacacacacacacacacacacacac	513	3	n	7.7e-10	+++++++++++++++
chr12:17000005-17000574	451	TCGCAGAGTGGAAACGCCCGAACAGACTAGCCTTCTCCGGGGTTAGGTGGGCCCAGGGCCTacacacacacacac acacacacacacacacacacacacacacacacacacacacacac	529	3	n	7.7e-10	+++++++++++++++
chr12:17000005-17000574	451	TCGCAGAGTGGAAACGCCCGAACAGACTAGCCTTCTCCGGGGTTAGGTGGGCCCAGGGCCTacacacacacacac acacacacacacacacacacacacacacacacacacacacacac	545	3	n	7.7e-10	+++++++++++++++
chr3:103129527-103130397	151	gggcttcagaataaAATGGGCTTCGTGTACACATGTACATACATACATACAATACAACTTCTGTGAAGTTTTTGC	188	3	n	1.1e-06	++ +++ +++ +++
chr3:103129527-103130397	301	GTTTCTTTTCCCGCAAAGCTAATTTTCCTACAAACTAGTGAGAATGTTCACAAAGACAAACATCACATGACTTCC	349	3	n	4e-05	++++ + +++ +++
chr3:103129527-103130397	601	CAGCTTCTGTAGCGAGAATAAAgtgtgtgtgtgtgtgtgtgtgtgtgtgtgtgtgtgtgtgtgtgtgtgtgtgtg tgtgtgtgtgtgtacgcgtgtgCACATGAgcctgcctgcctgcctgtctgtctgtctgTGTATGACTGGTCCAGT	623	3	y	7.7e-10	+++++++++++++++
chr3:103129527-103130397	601	CAGCTTCTGTAGCGAGAATAAAgtgtgtgtgtgtgtgtgtgtgtgtgtgtgtgtgtgtgtgtgtgtgtgtgtgtg tgtgtgtgtgtgtacgcgtgtgCACATGAgcctgcctgcctgcctgtctgtctgtctgTGTATGACTGGTCCAGT	639	3	y	7.7e-10	+++++++++++++++
chr3:103129527-103130397	601	CAGCTTCTGTAGCGAGAATAAAgtgtgtgtgtgtgtgtgtgtgtgtgtgtgtgtgtgtgtgtgtgtgtgtgtgtg tgtgtgtgtgtgtacgcgtgtgCACATGAgcctgcctgcctgcctgtctgtctgtctgTGTATGACTGGTCCAGT	655	3	y	7.7e-10	+++++++++++++++
chr3:103129527-103130397	601	CAGCTTCTGTAGCGAGAATAAAgtgtgtgtgtgtgtgtgtgtgtgtgtgtgtgtgtgtgtgtgtgtgtgtgtgtg tgtgtgtgtgtgtacgcgtgtgCACATGAgcctgcctgcctgcctgtctgtctgtctgTGTATGACTGGTCCAGT	671	3	y	7.7e-10	+++++++++++++++
chr3:103129527-103130397	601	CAGCTTCTGTAGCGAGAATAAAgtgtgtgtgtgtgtgtgtgtgtgtgtgtgtgtgtgtgtgtgtgtgtgtgtgtg tgtgtgtgtgtgtacgcgtgtgCACATGAgcctgcctgcctgcctgtctgtctgtctgTGTATGACTGGTCCAGT	723	3	y	3.2e-05	+++ +++ +++++
chr7:24081759-24082418	151	TTCCGGGTTTAGCCGGCAGTGCAGCCATTtgtgtgagtgtgtgtgtgtgtttgtatgtgtttgtgtgtgtgcgtg	189	3	y	2.2e-08	++++++++++++ ++
chr7:24081759-24082418	151	TTCCGGGTTTAGCCGGCAGTGCAGCCATTtgtgtgagtgtgtgtgtgtgtttgtatgtgtttgtgtgtgtgcgtg	207	3	y	9.7e-09	++++ ++++++++++
chr7:24081759-24082418	226	cgtgcgtgtgagtgtgtgtgtgtgtatgtgtgtgAAGGCGTCTTCTATGGCTCAGCTTTGTGGCTGGGCTCAGTC	243	3	y	1.7e-09	++++++++ ++++++
chr7:24081759-24082418	451	GTCCTCACCACGGGCTCACGGACGTCCAGGTTGGTGTTAGATGTGGGACGCTTACAGTGGTCGATGTGCGCATGC GCAGGGTCTAGGCGGGAATCTGGACGCGTTGGTGTCAGTGACTTGGGGTTCCTGTGCCTCAGAATAGGACTCAGG	514	3	y	5.1e-05	++++ + ++ +
chr7:24081759-24082418	601	GTCTCGGGAGGCTGTAAAGAGTGCACAGTTGTGCGCATGCGCGGATGGTTGGTTTTGTG	629	3	y	2.4e-05	++++ + ++ + +
chr19:45047504-45048222	76	CTGCAAGCGAAGGAGGCAAGTGGGGCGGCTCCTCCCCTTTTCTCCCTGGTTGGGAAGGAGGCCAGAATTGCTTCC	106	2	n	4.6e-05	+++ ++ + ++++
chr19:45047504-45048222	226	GCCAAGAGGGGGGGTGGGTCAGGCGAACGAGCTCAGGGAGCCCCCGCCCTTCCCTGCTGCTCAGCGTCACGCGTG	234	2	y	7.3e-05	++ ++ + + ++++
chr19:45047504-45048222	526	GGAGGGGTTGGTTGAGGCTGTGTGTTAGGCATGCTTTCAAATGTCTGCAACTGATAGATATGGCTGAGCgtgtgt gtgtgtgtgtgtgtgtgtgtgtgtgtgtgtgtgtgtAACGGTACTCTGGTTGGTTGACTAGTGTATACAGTGTGA	595	3	y	7.7e-10	+++++++++++++++
chr19:45047504-45048222	526	GGAGGGGTTGGTTGAGGCTGTGTGTTAGGCATGCTTTCAAATGTCTGCAACTGATAGATATGGCTGAGCgtgtgt gtgtgtgtgtgtgtgtgtgtgtgtgtgtgtgtgtgtAACGGTACTCTGGTTGGTTGACTAGTGTATACAGTGTGA	611	3	y	7.7e-10	+++++++++++++++
chr15:79062838-79063322	301	CTCCTTTCTTCCTTTTCTTCCTGTGATAGCTCCGGAAAGACGAATGGCAAATGCTTTAGCCAATCAAGGTAAGAA	307	2	n	4.3e-05	++ +++ + + +++
chr15:79062838-79063322	451	TCaaaaaaaaaaaaaaaaaaaaaaaaaaaaaaaa	453	1	n	3.7e-09	+++++++++++++++
chr15:79062838-79063322	451	TCaaaaaaaaaaaaaaaaaaaaaaaaaaaaaaaa	468	1	n	3.7e-09	+++++++++++++++
chr14:69805363-69805844	151	ACCTCCTTTTTTCATTCACAAAAAAAGCAAAGTTGGGGGGGTTGGAGGGGAGAGGGATTaaaaaaaaaaaaagaa aaaaaaaaaaaaaggaaaaaaaCTGCACCCAGGAACGGTTGCTGTGACAAGGACTGCCCACAGCGGCGTGTGGTT	224	1	n	3.7e-09	+++++++++++++++
chr14:69805363-69805844	376	CCCGCTCCTCTCCTGGTTTTGCACCTCCTCCCTTTTCCCCTGGGAGCCACGAATGGCCAGCAGCTGACCTCGCCA	402	2	n	3.3e-05	+++ +++ + ++ +
chr3:51728537-51728732	151	GGAAAAAGgtgtgtgtgtgtgtgtgtgtgtgtgtgtgtgtgtgtg	159	3	y	7.7e-10	+++++++++++++++
chr3:51728537-51728732	151	GGAAAAAGgtgtgtgtgtgtgtgtgtgtgtgtgtgtgtgtgtgtg	175	3	y	7.7e-10	+++++++++++++++
chr13:52550957-52551607	1	tgacttgagcttgtgtcaagttgaaaaaaaaAAAAAAAAGTCAGCACCGAGGTGGTTTCATTACATAAGCCTTCA	24	1	n	3.7e-09	+++++++++++++++
chr13:52550957-52551607	76	GTCAGGCCCTCTGACTCCCAACCAGGAGACTCGGAGGGGGAGGAAAGCAGGATGTATGGTGACCAACAACTCTCT	108	2	y	1.2e-05	+++++ ++++ + +
chr13:52550957-52551607	226	GACTCCATAGGAGGCCTGCCAATGTCTGTGAGAGGAGAGAGGCAGCGGCCAAAGGGGGTGAATTCTAACATCACA	257	2	y	6.9e-05	+ + ++++++++
chr13:52550957-52551607	376	AACTCACCCAGGTATGGGCAAGCCTGTCTCAGTGGTACCCTCGGCCCTTGCTGGCAGCCAGAGATAGGAAACAAC	429	2	y	3.3e-05	+ ++ +++++ +++
chr13:3406783-3406980	76	CACTGGTCTGTTTCCCTATTTGTGGAGTGTGGCCACTGAGCCCTAGTAAGTGGCCATCAATGttttttgtttttg tttttctggttttttttttttttgtttttttgtttttttgttttttt	139	1	y	5.1e-08	+++++ +++++++++
chr13:3406783-3406980	76	CACTGGTCTGTTTCCCTATTTGTGGAGTGTGGCCACTGAGCCCTAGTAAGTGGCCATCAATGttttttgtttttg tttttctggttttttttttttttgtttttttgtttttttgttttttt	163	1	y	6.8e-09	+++++++++++++++
chr13:3406783-3406980	76	CACTGGTCTGTTTCCCTATTTGTGGAGTGTGGCCACTGAGCCCTAGTAAGTGGCCATCAATGttttttgtttttg tttttctggttttttttttttttgtttttttgtttttttgttttttt	183	1	y	9.9e-09	+++++++++++++++
chr2:73485342-73486590	1	agccccagccccagccAAAGCAAAACAACCCCGCTGGCTAACTCGGCAGTTCTAATGCTTGACCTCCTTCCTCCT CTTGACTCAGACCTGAGACATTGCCCTTGCGCTTCACAGGCCTGGAAGCAGCCAGTTACTTTGTGAGAATTTCTG	63	2	n	3.3e-05	+++ + ++ ++++
chr2:73485342-73486590	376	TTGCCTCTTAAACCGAGGACTTCCCCATCTACACTCAAGCTGCCCTACCCCCCCCTCTTCTCTCCCCACAGCTCA	419	2	n	3.1e-05	+++ ++ + ++++
chr2:73485342-73486590	451	TGTAAGGAAGGAAAGGAAGGAAGGGGGTGGGGCAGAAAAATGTATGGGACTGAAAAGTTATTCTGTCATGAAATG	456	2	y	7.3e-06	+++ + + +++ +++
chr2:73485342-73486590	451	TGTAAGGAAGGAAAGGAAGGAAGGGGGTGGGGCAGAAAAATGTATGGGACTGAAAAGTTATTCTGTCATGAAATG	472	2	y	4.3e-05	+ ++ + +++++
chr2:73485342-73486590	901	AGCCAGGGCAGTTTTTTTTTTTTTTTTCTTCTTCTCTCATTAGAAACACACATAAAGTCAGCTCAAGGAAAGGCA	912	1	y	3.7e-09	+++++++++++++++
chr7:127110807-127111819	1	CCAGACACGGTGCAACATTGCCACCTGTTGGTCTGTACAAGAGCCGCAGCCTTCACGCAATCTGTCTGGTTCCCT CTACCCCCACCCCCCTTTCAcccaagctgtcctggaatttacaatggaacccaagctggccttgaacttcaggca	69	2	n	7.8e-05	+ +++++ ++ ++
chr7:127110807-127111819	151	ctcctgcctcggtttcccaaatgcttttggatttccatgtTGGTCTCTGAATTGCAgttttcatgagaatcctgt	153	2	n	5.1e-07	++++++++ + +++
chr7:127110807-127111819	376	AGTTCTATCCACTTCTGCTTTGTTTGATTGTTTGtttgtttctccaagagagggtttctatgtatagccatagct	398	1	y	1e-06	+++ ++++++++++
chr7:127110807-127111819	451	gtcctataactccctctgtagatcaggttggcctcgaactcaagagacccatctgcctcggcctcctgagtgccg	502	2	n	6.9e-08	+++++++ ++++++
chr7:127110807-127111819	901	gcacatgggagggtgaggtaagaagatttcaacaaggcggaggacagcctgggctacgtatacattccaaagcat	908	2	y	3.6e-06	+++++ ++++ + +
chr4:135353076-135353833	301	ATCTTTGGGTCGCCCAACCCTACCGATCttttttttttttttttttttGTGGCGCATGATCAGCGGTGTTCGCGC	329	1	y	3.7e-09	+++++++++++++++
chr4:135353076-135353833	601	TGAAGCCCGCGTGTTCGCCGGATGTGCGTCGCATCTGGCTTGTTCTTGAGGTGTCCATTGGATACCTTTCTGTGC TTCTGCTGCGAAACCACGCCGAAGGGCAGGAAGTGGAAGAGGGCCAAAACCGGCCCTTTAATGTGCTCACCAAGC	665	2	n	3.8e-05	+++ ++ +++ ++
chr14:70159446-70159940	226	CTTTAGCCGGCTGGCTGCGAGAGGTCACCGCTCCCCACCCCGAGacacacacacacacacacacacacacacaca cacTGCTCGAGTTGCCTGTGTTCCTGCTGCTGCAGCTTGGAACCTTACTAATGCGGAGCTGCACTGCACAACAGC	271	3	n	7.7e-10	+++++++++++++++
chr14:70159446-70159940	226	CTTTAGCCGGCTGGCTGCGAGAGGTCACCGCTCCCCACCCCGAGacacacacacacacacacacacacacacaca cacTGCTCGAGTTGCCTGTGTTCCTGCTGCTGCAGCTTGGAACCTTACTAATGCGGAGCTGCACTGCACAACAGC	287	3	n	7.7e-10	+++++++++++++++
chr4:98923106-98923714	1	ACCCTTCCGGAGAGGGCACGCCAGGAGGGGGaagaaaaaaaaaaaaaaagaaagaaagaGGCGGGCCTGCACCGG	35	1	n	3.7e-09	+++++++++++++++
chr4:98923106-98923714	1	ACCCTTCCGGAGAGGGCACGCCAGGAGGGGGaagaaaaaaaaaaaaaaagaaagaaagaGGCGGGCCTGCACCGG	51	2	y	3.8e-05	++ ++++++ ++
chr4:98923106-98923714	376	GCGCATTTGAGCACCTGAGGAAGGGGCTTGTCCCAGTCACTCCCTGTCCCATCTCCCGACCCGTAAGCTCCCTCC	418	2	n	8.3e-05	++++ + + + ++
chr4:98923106-98923714	451	CCTTCAACTCGCGAGTGCTAATGTTTaaaaagaattaaaaaaaaaaaaaaaaaaaaaaaaaaaGAGGGCGTGAGC	487	1	n	3.7e-09	+++++++++++++++
chr19:46502903-46504150	76	TGTGTGACGTGGAGATACGGAGGAATGAGATACGGGCAAGTACACTGAACGCGTGCGAacacacgcacacgcaca cacacacacacacacGACTTGGGAGCCACCCATCCGCACAAGCTGACTCTCGTGACATTAGCCTAGAGGCCCTCT	147	3	n	7.7e-10	+++++++++++++++
chr19:46502903-46504150	301	CTGCGCCCTTAAGATCTCTCCTTCAGTCATTTATGGAATTGGGGGGAGGCTGTTAGAAGTAGTTTGGAGTGTTGC TTTTCTGTTTTGCGCAGTTTCCCCCCCCCGCCCCCCGCATTGTTTCTGTAAGCTCTACGGGAAGTCACCAAGGCA	371	1	y	9.9e-05	++ ++++ +++++
chr19:46502903-46504150	301	CTGCGCCCTTAAGATCTCTCCTTCAGTCATTTATGGAATTGGGGGGAGGCTGTTAGAAGTAGTTTGGAGTGTTGC TTTTCTGTTTTGCGCAGTTTCCCCCCCCCGCCCCCCGCATTGTTTCTGTAAGCTCTACGGGAAGTCACCAAGGCA	396	2	n	7.8e-05	++ ++ + +++ ++
chr17:86167484-86167737	1	TGCTCCCCCAACCGGCAAAACTTTCTATTTCCCCAAACAGTGGCGCGCGCGCGCGCGCGTGcacacacacacaca cacacacacacacacacacacacacacactcacacacacTGACGTCTTTTGCGCATTTCCTGCATTAGAGGGAGG	62	3	n	7.7e-10	+++++++++++++++
chr17:86167484-86167737	1	TGCTCCCCCAACCGGCAAAACTTTCTATTTCCCCAAACAGTGGCGCGCGCGCGCGCGCGTGcacacacacacaca cacacacacacacacacacacacacacactcacacacacTGACGTCTTTTGCGCATTTCCTGCATTAGAGGGAGG	78	3	n	7.7e-10	+++++++++++++++
chr17:86167484-86167737	1	TGCTCCCCCAACCGGCAAAACTTTCTATTTCCCCAAACAGTGGCGCGCGCGCGCGCGCGTGcacacacacacaca cacacacacacacacacacacacacacactcacacacacTGACGTCTTTTGCGCATTTCCTGCATTAGAGGGAGG	94	3	n	5.1e-08	+++++++++++ +++
chr13:22015909-22016135	151	gtacttatatataataaaaaaaaaaaaaaaaaaaaaaaaTAGAGTCTACTATTTACATACTTTTGACCCTAATAT	166	1	n	3.7e-09	+++++++++++++++
chr5:115134715-115135171	376	ACACTCCAGTCACTCTGGATATTTAAAACACATGCttttttttttttttttttaaattattagatattttcttta	411	1	y	3.7e-09	+++++++++++++++
chr3:51559772-51560950	151	CCTAGCCATGATTTCATCtttttttttttttttttttttttttttttttttACCCCGGAGGAGCGGCCAGGGCCG	169	1	y	3.7e-09	+++++++++++++++
chr3:51559772-51560950	151	CCTAGCCATGATTTCATCtttttttttttttttttttttttttttttttttACCCCGGAGGAGCGGCCAGGGCCG	184	1	y	3.7e-09	+++++++++++++++
chr3:51559772-51560950	526	cggggccccattccccgcccctgccccgccgcgccccgcacgctcccggcggcgTGGCGTAGGCAGTGCAGCCCC	539	2	n	6.1e-05	++ +++ +++++ +
chr3:51559772-51560950	826	CTCCCGTCCCTCTGGGTGCTCCTGGTGGCTGAGCGAGCGCTGGAGCTAAGCCCTGCGAGTTTggaggagggggag gagggggaggaagaggaggagCAGTCGGGGCGGCTCGCGCTGCCTCCCCCTACAGTCCTTTCAATTCCTCCGCCA	900	2	y	6.7e-06	+++++ ++++ ++
chr3:51559772-51560950	826	CTCCCGTCCCTCTGGGTGCTCCTGGTGGCTGAGCGAGCGCTGGAGCTAAGCCCTGCGAGTTTggaggagggggag gagggggaggaagaggaggagCAGTCGGGGCGGCTCGCGCTGCCTCCCCCTACAGTCCTTTCAATTCCTCCGCCA	939	2	n	5.7e-05	+++++++ +++ +
chr17:47535817-47536338	1	AGAGGCCGCCAGCCGCAGTGAGACTCACTATCAGCTCCCTCAGCTGTATCACACACACACCCCCACCCCACCCCA	50	3	n	1.2e-05	+++++++++++ + +
chr17:47535817-47536338	76	TCGGGTGGTTTGTTTCTGTTTTTTTTCTTTAGAGATGACAGATTCTGCAAACAAGGGCTCCAGCTGTTTATCAGG	84	1	y	6.2e-06	+++ +++ + +++++
chr17:47535817-47536338	151	GGCCCCTCCTAGGCCCAAGTGCCAGGGGCTCCCACTCCCTGCTGGAGAAGCTGTAGGGTCCTGATTAAGTCGACA GCTGAGGCAGGAGACTTGGGAGTAGAACAGAGAGAGGCTAGAAAACACAGCAAAAGACAGAGGCAGAACGCTTGA	222	2	y	5.8e-06	+ ++ ++++++++
chr17:47535817-47536338	151	GGCCCCTCCTAGGCCCAAGTGCCAGGGGCTCCCACTCCCTGCTGGAGAAGCTGTAGGGTCCTGATTAAGTCGACA GCTGAGGCAGGAGACTTGGGAGTAGAACAGAGAGAGGCTAGAAAACACAGCAAAAGACAGAGGCAGAACGCTTGA	278	2	y	1e-06	++ +++++++++
chr11:61266845-61267552	151	TGGCGCTCCATGGCCGGGCCTGAGGAGAACGCGGAGCGAGGCAGGTGAGGGAGCACAGTACCAGTAAGGAGCTGC	181	2	y	9.4e-05	+ + ++++++++
chr11:61266845-61267552	526	GCCCGAGGGTGCTCACCCGGCCGGAAGTAGTCTCCCTTCGCCTGCAGTGCCTCAGATTCAGAGGCAAAGTCGCTG	556	2	n	6.5e-05	++ +++ ++++ +
chr11:61266845-61267552	601	GGCCTGGGTAGGGCGGGCCTGGGTGGGGCGGGCCGGGTGACGCACGCGAAGGAGGTGAATCCAGTGTATacacac acacacacacacacacacacaAGCATTGTCAT	671	3	n	7.7e-10	+++++++++++++++
chr11:61266845-61267552	601	GGCCTGGGTAGGGCGGGCCTGGGTGGGGCGGGCCGGGTGACGCACGCGAAGGAGGTGAATCCAGTGTATacacac acacacacacacacacacacaAGCATTGTCAT	687	3	n	5.6e-07	++++++++++ ++
chr4:134478180-134478378	151	actctgccctccacatgtgtgtgcacatgcaaacacacacacacatac	184	3	n	1.4e-08	++++++++++++ ++
chr7:144914775-144915345	1	AGCAGAGGATGCCGGATACTCCTCCCTCCTTGAAGCCTGCCCCTTGGGCCCTTCCTCCATTTCCTGGGAACGCCC	50	2	n	2.4e-05	+++ ++++ +++
chr7:144914775-144915345	151	TTTGAAAATAAAAGCAGGGTTCGTCTGGACACCGCGAGCGACCCAGACGACGTGCCCCAAGCGACCTGACCCGCC	154	2	y	7.3e-05	+ + + + +++++
chr7:144914775-144915345	226	CCACCCACCACGGAGCGAGCGGTACCAAGGAGGAGGAGCAAGGCTTCCCTCGGGCTAGCCCCGCCCATGTAGCAT	254	2	y	6.1e-05	+++++ +++ +++
chr7:144914775-144915345	301	CTACCCATGCGCAGTGGGATGGGCTTTTTTTTTTTTTTTGGCTTCTTTAGCTTGCCGTCCTTACCCGCCCTGCTC	325	1	y	3.7e-09	+++++++++++++++
chr12:101958146-101958510	301	ATCCTCGCAGCCAAGTTTTAGGttcttttttttcttttttttttttttttcCATCTCCACCTTC	335	1	y	3.7e-09	+++++++++++++++
chr2:155538434-155538634	1	gtgtgtgtgtgtgtgttgggagccgcccccacattcgccgtcacaagatggcgttgacatcctgtgttctaagtg	1	3	y	7.7e-10	+++++++++++++++
chr10:95773680-95773973	1	TACTCCGCCTGAGCCTCTCTGACTTACGCAACTATTACGCAGACGCACTTGTCCAGTGTGGCAACAGCCGCTACG	4	2	n	3.8e-05	+ ++++ +++++
chr10:95773680-95773973	1	TACTCCGCCTGAGCCTCTCTGACTTACGCAACTATTACGCAGACGCACTTGTCCAGTGTGGCAACAGCCGCTACG	36	3	n	9.3e-05	++ ++ ++ +++
chr10:95773680-95773973	151	GGCAGTCTGATCGGGCTGGCAGGAGGGAAAGGCATGACTTACTGTAGCTCTTGGCCCAGGCCACCGAACACTCAG	172	2	y	5.8e-06	+++++ + +++++ +
chr10:95773680-95773973	226	TACCTTGTACCCCGTTAGCCTTGGGCAGTAAACCCTCTGATAAAATGTTCTCTTTTGGTGTTTGTTTT	278	1	y	8.7e-07	++++ +++++++++
chr11:53628015-53628215	151	CCTTCATTTAAAAAATGAgtgtgtgtgtgtgtgtgtgtgtgtgtgtgtgt	169	3	y	7.7e-10	+++++++++++++++
chr11:53628015-53628215	151	CCTTCATTTAAAAAATGAgtgtgtgtgtgtgtgtgtgtgtgtgtgtgtgt	185	3	y	7.7e-10	+++++++++++++++
chr7:100863206-100863743	376	CAGGGGCTACGACTAGGATGTTCTTCAGATGCATCCCTTGGGGCGCATCAGGGAGGCGCGGCCgtgtgtgtgtgt gtgtgtgtgtgtgtgtgtgtgtgtgtgtgtgtgtgtgtgtgtgtgtgtgtgtgtgtgtgtgtgtgtgtgtgtgtg tgtgtgtgtgtg	439	3	y	7.7e-10	+++++++++++++++
chr7:100863206-100863743	376	CAGGGGCTACGACTAGGATGTTCTTCAGATGCATCCCTTGGGGCGCATCAGGGAGGCGCGGCCgtgtgtgtgtgt gtgtgtgtgtgtgtgtgtgtgtgtgtgtgtgtgtgtgtgtgtgtgtgtgtgtgtgtgtgtgtgtgtgtgtgtgtg tgtgtgtgtgtg	455	3	y	7.7e-10	+++++++++++++++
chr7:100863206-100863743	376	CAGGGGCTACGACTAGGATGTTCTTCAGATGCATCCCTTGGGGCGCATCAGGGAGGCGCGGCCgtgtgtgtgtgt gtgtgtgtgtgtgtgtgtgtgtgtgtgtgtgtgtgtgtgtgtgtgtgtgtgtgtgtgtgtgtgtgtgtgtgtgtg tgtgtgtgtgtg	471	3	y	7.7e-10	+++++++++++++++
chr7:100863206-100863743	376	CAGGGGCTACGACTAGGATGTTCTTCAGATGCATCCCTTGGGGCGCATCAGGGAGGCGCGGCCgtgtgtgtgtgt gtgtgtgtgtgtgtgtgtgtgtgtgtgtgtgtgtgtgtgtgtgtgtgtgtgtgtgtgtgtgtgtgtgtgtgtgtg tgtgtgtgtgtg	487	3	y	7.7e-10	+++++++++++++++
chr7:100863206-100863743	376	CAGGGGCTACGACTAGGATGTTCTTCAGATGCATCCCTTGGGGCGCATCAGGGAGGCGCGGCCgtgtgtgtgtgt gtgtgtgtgtgtgtgtgtgtgtgtgtgtgtgtgtgtgtgtgtgtgtgtgtgtgtgtgtgtgtgtgtgtgtgtgtg tgtgtgtgtgtg	503	3	y	7.7e-10	+++++++++++++++
chr7:100863206-100863743	376	CAGGGGCTACGACTAGGATGTTCTTCAGATGCATCCCTTGGGGCGCATCAGGGAGGCGCGGCCgtgtgtgtgtgt gtgtgtgtgtgtgtgtgtgtgtgtgtgtgtgtgtgtgtgtgtgtgtgtgtgtgtgtgtgtgtgtgtgtgtgtgtg tgtgtgtgtgtg	519	3	y	7.7e-10	+++++++++++++++
chr19:24280206-24281243	76	CGCGCGCCCTGCACCCAAACGCGCGCGCAACCAGAGCGACTCGGCGCGTGCGCGCTGCGCGTCCCCGGCATAGGG	87	3	n	9.3e-05	+++ ++ ++ + + +
chr19:24280206-24281243	376	GGCCGCTCCGCCCCGCGCGAGGACTCGGTGGTGCCACCTGGTGGCCGTGccccccccccgcccccccccgccccc ccccccccccGAGCGCCGCGGCTGGGCTCCTGCGCGCAGGTCCAGCACTACAGCCCTGTGCAGACCTTTAACCAG	426	2	n	7.8e-05	++ ++ + +++ ++
chr19:24280206-24281243	376	GGCCGCTCCGCCCCGCGCGAGGACTCGGTGGTGCCACCTGGTGGCCGTGccccccccccgcccccccccgccccc ccccccccccGAGCGCCGCGGCTGGGCTCCTGCGCGCAGGTCCAGCACTACAGCCCTGTGCAGACCTTTAACCAG	442	2	n	9.4e-05	++ +++ + ++ ++
chr19:24280206-24281243	676	TTGCTTAAAAAACAAAACAAAACTAGTTCTAACAGCTAGCTTCAACTGCCCGATCATCTCAAATTCCGCATCTCT	682	1	n	6.1e-07	++++++ ++++ +++
chr19:24280206-24281243	826	gttgctgatggctataggatgagggagggtgagttttcttctgggatatggcctctgattggctgtcctagctcc	839	2	y	3.5e-05	+++ ++++ +++
chr19:24280206-24281243	901	atggggatggtcctacactgtatacactgttagggctaagtggagtcggtttaaaaaaaaaaaaATTCAGAGCGg	951	1	n	2.4e-05	+++++++++++++
chr19:24280206-24281243	976	tggtagtgtacacctttaatcccagcacccgagaggcagagtcaggtatatggagttcgagg	1007	2	y	1.8e-07	+++++++++ ++++
chr7:46710475-46710908	301	TCTTCTTCTCCACCCAGAGCTAGGAGTGAGCACAGAacacacacacacacacacacacacacacacacacacaca cacacaGTAACTGCCATGTCCAGATATGTTAGCTATTCATTAGTGCTGATTTAAACCT	338	3	n	7.7e-10	+++++++++++++++
chr7:46710475-46710908	301	TCTTCTTCTCCACCCAGAGCTAGGAGTGAGCACAGAacacacacacacacacacacacacacacacacacacaca cacacaGTAACTGCCATGTCCAGATATGTTAGCTATTCATTAGTGCTGATTTAAACCT	354	3	n	7.7e-10	+++++++++++++++
chr7:46710475-46710908	301	TCTTCTTCTCCACCCAGAGCTAGGAGTGAGCACAGAacacacacacacacacacacacacacacacacacacaca cacacaGTAACTGCCATGTCCAGATATGTTAGCTATTCATTAGTGCTGATTTAAACCT	370	3	n	6e-05	++++++++++++
chr3:54807732-54808124	226	atgcctttaatcccagcactcgggaggcagaggcaggcaaatttctgagttcgaggccagcctggtctacaaagt	248	2	y	4.3e-10	+++++++++++++++
chr1:131658092-131658451	1	ACACACTTCCTCTTTTATAACTGAAGAATCTGAAACTCAAAAAAAAAAAAAAAATCACAAGCCGTTTGGTAGGAC	39	1	n	3.7e-09	+++++++++++++++
chr1:131658092-131658451	76	TCAAACGCTGCTTTGTCTACATTCAAGCCTGTAAGTCACTGTGCAAGAAGGATGGCACGCATGCGCGTGCTGGCA	131	3	n	9.3e-05	+++ ++ + + +
chr8:47673708-47675543	76	CCTAGGCCGGACCCTCCCCGCcacacactcacacacacacgcacacacacacacggacgcacacacatacacaac	109	3	n	2.3e-09	+++++++ +++++++
chr8:47673708-47675543	76	CCTAGGCCGGACCCTCCCCGCcacacactcacacacacacgcacacacacacacggacgcacacacatacacaac	133	3	n	7e-08	+ ++++++++ ++++
chr8:47673708-47675543	226	GCTGAGTGAGACACCGGGCGGCCCGGAACTTTCCCCGGGGCGAGAGGGAAGCACAGACCGTCCCAGTCCCGCGCC	262	2	y	9.4e-05	++ + +++++ + +
chr8:47673708-47675543	301	ACGCCGGGAGCTGGAGGGGGGTGGGGGTGGGGGGAGAGGCATCTCCCGAGTCCACCTCCGCCGTCCTCTCGCCCC	329	2	y	8.9e-05	++ ++ +++++++
chr8:47673708-47675543	676	GTGTGCTGTGCCGTCCCCCCACCCAGacacacacacacacacacacaACCGCTTCCCGGCCCCACACACCAGATC	703	3	n	7.7e-10	+++++++++++++++
chr8:47673708-47675543	901	CAGCCGGCTCCGCTCTCCGGTCAGGAGCGCGGCCGACGAGTACAgctgctgctgctgctgctgcCCTAACATCCT gccgccgccaccaccaccaccgccgccgccgccgctgctgctgctcctcgccgccgccgccgccgccgcctccgc ATCCAGCAGCCACACATGCAACAGCCACGACCGCCGCTCCTCCGCTCGGCAGCCCGGCGCCGCGGGGACACGGCC	973	2	n	6.9e-05	++++++ + +++ ++
chr8:47673708-47675543	901	CAGCCGGCTCCGCTCTCCGGTCAGGAGCGCGGCCGACGAGTACAgctgctgctgctgctgctgcCCTAACATCCT gccgccgccaccaccaccaccgccgccgccgccgctgctgctgctcctcgccgccgccgccgccgccgcctccgc ATCCAGCAGCCACACATGCAACAGCCACGACCGCCGCTCCTCCGCTCGGCAGCCCGGCGCCGCGGGGACACGGCC	1040	2	n	8.3e-05	+ +++++ ++ +++
chr8:47673708-47675543	1351	CCGGGGCTGCCCGGTCGCCCGGATCCCCGTGACAAGCCCCTCGCTACCCTCTCGCCTCTCTATCAGCCTCCGTGC	1407	2	n	3.1e-05	++ ++ ++++++
chr8:47673708-47675543	1576	GATTGGTCTGTCAGCTCTCGCCTGGGGGCGGGGGGAGGGTGCGGAGGCCGGCCAAACGGCAGGCCGCGCCCCGCC	1599	2	y	8.5e-06	++ +++ + ++ +++
chr11:32542762-32543111	226	CTTCCCTTCCCTTTTCGCTTCTGCTTTCCCATGTTGCAAGTTTTTTTTTTTTTTTTTTCCTTCCTTCCTCCACAG	266	1	y	3.7e-09	+++++++++++++++
chr8:121108145-121108586	1	GGGACTGATCCTCCCTCCCGGCTGCCAGCCTCGGCGTCCCAGCCGTACCAGGCCGAGCCGCGTCCTCCCCCACGC	25	2	n	1.7e-05	++ +++++ ++ +++
chr8:121108145-121108586	76	ATGCGGACCACGGGAACAACCGCGCCGTCCCAGCCTCGGTTTCCCCATCACCCTCGGTCTTCCTCACCCTCCTGG	105	2	n	9.9e-06	++ +++++ + +++
chr8:121108145-121108586	76	ATGCGGACCACGGGAACAACCGCGCCGTCCCAGCCTCGGTTTCCCCATCACCCTCGGTCTTCCTCACCCTCCTGG	133	2	n	2.6e-06	++ ++++ +++++
chr8:121108145-121108586	376	CCTTGCAACGCGGATGCCCAGGATTTCCCGAGACACACACGCACACAACACGCATACATTTATACC	409	3	n	7.7e-08	+++++++ ++++++
chr8:121108145-121108586	376	CCTTGCAACGCGGATGCCCAGGATTTCCCGAGACACACACGCACACAACACGCATACATTTATACC	424	3	n	3.2e-05	+++ ++ +++ +
chr6:125445636-125445836	1	TGACCTCACCCAGACACATGCATGgtgtgtgtgtgtgtgtgtgtgtgtgtgtgtgtggtgtgAAACTTTCCAGTG	7	3	n	1.9e-05	+++ ++ +++++ +
chr6:125445636-125445836	1	TGACCTCACCCAGACACATGCATGgtgtgtgtgtgtgtgtgtgtgtgtgtgtgtgtggtgtgAAACTTTCCAGTG	25	3	y	7.7e-10	+++++++++++++++
chr6:125445636-125445836	1	TGACCTCACCCAGACACATGCATGgtgtgtgtgtgtgtgtgtgtgtgtgtgtgtgtggtgtgAAACTTTCCAGTG	41	3	y	7.7e-10	+++++++++++++++
chr15:84430659-84430868	151	GTGTACAAGAGGGAGCACAGGgtgtatgtgtgcgtgtgtgtgtgtgtgtgtgtgtgtgt	184	3	y	7.7e-10	+++++++++++++++
chr4:135433751-135434308	76	CCCAGGGGGCGCGCTGCGCCGGCGCACAGACAGGAGGGCGGGGCTGACAGCTGGGTGGGCGGGAGTCGCCGAGTG	108	2	y	8.3e-05	+++++ + +++ +
chr4:135433751-135434308	226	GCTTTGAGGGACTTGGGCCGGCACTCTTTTTTTTTTTTTTTCCCACCCCCCCTGGGCCGGCACTCTTAAGGCAGA	252	1	y	3.7e-09	+++++++++++++++
chr4:135433751-135434308	301	GGCTTTCCTTGACCTCCAGAACGGGACTTTTGATGTCCCCTTGGTATCCGCCGCCCCCAAGAAACATTTTCTCTC	303	2	n	6.5e-05	+ + +++ +++++
chr1:152902615-152903438	1	CTGGCGGTCGCCGCCATCTTCCTCTCCTCCGACTCCTCCTCGCTTGGCGCggggtgggggggggggagagtgagt gaggcgagggggagggagttggggggagcggCTCCGGCAGCGGCTGCGGCTCTGGCCTGTGGGGCGCAGGGACGC	65	2	y	3.1e-05	++++ +++ +++
chr1:152902615-152903438	151	TCCGGCTCCggaggggggggggaaaaagaaggggaaaggggcggggaaagaggaggggagaagcagaggaaggAA	181	2	y	9.4e-05	++ + ++ +++ ++
chr1:152902615-152903438	151	TCCGGCTCCggaggggggggggaaaaagaaggggaaaggggcggggaaagaggaggggagaagcagaggaaggAA	209	2	y	4.2e-07	++ +++++++ +++
chr1:152902615-152903438	451	CACACTCAAAGCCTTCCGCCCGGCCACCCGCCCACTTCTCACTTCCTTCCTTCTTTCTTTTTTTTTTTTTTCCCA	505	1	y	8.2e-08	++ ++++++++++++
chr1:152902615-152903438	601	TCCCCTCGCGCGCCGGAGAGTGACGCAGAGGCCTCCCCCGTTTCAGCCGCCCCTCCCCGGGCACTCTGGGAGAAG	615	2	y	4.3e-05	++++ ++ ++++
chr1:152902615-152903438	601	TCCCCTCGCGCGCCGGAGAGTGACGCAGAGGCCTCCCCCGTTTCAGCCGCCCCTCCCCGGGCACTCTGGGAGAAG	637	2	n	4.6e-05	++ + ++ +++ ++
chr6:57743504-57743684	76	ggaagaatccagtgtttgtttgtttggttggttggttggttggttttgttgttgttgtttgtttgtttttggttt ttcgagacagggtttctctttatagccctg	90	1	y	6.1e-07	+++ ++++++++ ++
chr6:57743504-57743684	76	ggaagaatccagtgtttgtttgtttggttggttggttggttggttttgttgttgttgtttgtttgtttttggttt ttcgagacagggtttctctttatagccctg	137	1	y	1.4e-06	+++ +++++ ++++
chr16:20302290-20302681	1	AGCGCCAGCCTCGCTGTACCCAACCTTGCAACGCCATCTTCCCAACCTCTGCCCCACCATGGCCCGACCTCTCTA	42	2	n	4.3e-05	++ ++++++++ +
chr16:20302290-20302681	76	ACCCCGGCCTAGAAATCACTTCCGGGGCGaagaaaaaaaaaaaaaaaaaaaaGCCACACAGCGCGGAGGAGTGGT	108	1	n	3.7e-09	+++++++++++++++
chr6:113483212-113483558	151	GCGACTCGGCCCACAGCGCCCGGGGCGGAGGCGGGGACTTTTTTTTTTTTTTTTTCCCTCCTCCTCTAAGGTCTA	171	2	y	5.7e-05	+ +++ +++++ ++
chr6:113483212-113483558	151	GCGACTCGGCCCACAGCGCCCGGGGCGGAGGCGGGGACTTTTTTTTTTTTTTTTTCCCTCCTCCTCTAAGGTCTA	189	1	y	3.7e-09	+++++++++++++++
chr6:113483212-113483558	226	GCAGGGTTTGGATCCTCCCAGTCCTGTTTCAGGCTGTGCCTCCATCTCCCAAAGAGGCTCTGAACTTGACCCCTT	260	2	n	7.3e-05	++++++ ++++
chr11:97435002-97436251	376	TTTCAAGCTCCTACTGTGTACCCTGGGTCGGTGCTGAGATTTTCATTTTTTGTTTTTGAAACGGTTATGCTATCC	417	1	y	2.2e-06	++ ++++++ ++++
chr11:97435002-97436251	451	TCTAACTGTCCTGCTTCCTCAGTTGAAAGTACAGACAGGTACTATCACACCCTGCTAAGGCTTTCTTTTGTTGAT TTAATCCTTCCAACATCCTTTGGGTGAAAGTTTGGACCCACCTTCATTTTGTGTGCTGACTCCTGTCTGCGATTG	475	2	y	3.8e-05	+ + + + ++ ++++
chr11:97435002-97436251	451	TCTAACTGTCCTGCTTCCTCAGTTGAAAGTACAGACAGGTACTATCACACCCTGCTAAGGCTTTCTTTTGTTGAT TTAATCCTTCCAACATCCTTTGGGTGAAAGTTTGGACCCACCTTCATTTTGTGTGCTGACTCCTGTCTGCGATTG	513	1	y	3.8e-06	++ +++++++ +++
chr11:97435002-97436251	601	TTCCTTTCCCTCCTGGACAGATGGTGGTTGGGTGCCAGGCATGGAAAATACTCCCCTGCCCCCTACCTCAGCCTC CCTCTTCCTTGGCTATGACCCACTTTGAGAGGGGCAGGGATCACTGGTGTGTCACTGTGGTCTGAGAAGGAGAGC	662	2	n	3.6e-08	+++ ++++ ++++++
chr11:97435002-97436251	976	GAGGCACTGCCCTGAAGGGAGGAGACTAGGCCAGGGGGCAGGCATTGTCTGTCACATGCTCCCATGGCTACCTTA	996	2	y	5e-05	++++ + + ++++
chr11:97435002-97436251	1051	GCCCTACCTCTGGATTTGTCACTGTGTGTGAGGTTGTGGGTGGCTACGGGTCTGTGTTTGATGGTGTGAGAGACC	1072	3	y	8.5e-05	++++++++ + ++
chr11:97435002-97436251	1201	GAGGTGCTGAGCAAGCAGAGGAAGGAAGAGCGGGCGGGCCTGACCTTGA	1211	2	y	3.4e-06	+ + +++++++ +++
chr11:8589688-8589913	151	AGGTGtgtgtgtgtgtgtgtgtgtctgtctgtctgtctgtctgtctgtctgttgtcCCTGTGTAGGTGGGGTTGT	153	3	y	7.7e-10	+++++++++++++++
chr11:8589688-8589913	151	AGGTGtgtgtgtgtgtgtgtgtgtctgtctgtctgtctgtctgtctgtctgttgtcCCTGTGTAGGTGGGGTTGT	171	3	y	2.7e-05	++++ +++ +++ ++
chr11:116018191-116018509	226	GAATGCTCATAACAGCCTCAACTGCCTGGGCAGTGGTacacacacacacacacacacacacacaGagccagacgg	264	3	n	7.7e-10	+++++++++++++++
chr11:116018191-116018509	226	GAATGCTCATAACAGCCTCAACTGCCTGGGCAGTGGTacacacacacacacacacacacacacaGagccagacgg	280	3	n	8.1e-05	++++++++++ + +
chr9:21367485-21368025	76	GAAAAAACCGCCTTTGGAAAAAACAAACGAAATGGATGGGCTCCCGTCAGGTGATTCGGGTCTACCAATAGTGAA	93	1	n	2.3e-05	++++++ +++ +++
chr9:21367485-21368025	376	GGCCGCTGCCAGTCACGTGGCCCTGCACCTCCCCGGcgcgcgcccgcccgcccgctcgctcgcccCCGGTCCCCG GCTCCTCCTCCTCCTTTTCTCGCCATTGCAGTTGGGACTGAAGCAGCCCCGGCGAAAACCGCGTGGCTTTTTTTT TTTTTTTTGAGGGGG	447	2	n	7.3e-05	++ + +++ +++++
chr9:21367485-21368025	376	GGCCGCTGCCAGTCACGTGGCCCTGCACCTCCCCGGcgcgcgcccgcccgcccgctcgctcgcccCCGGTCCCCG GCTCCTCCTCCTCCTTTTCTCGCCATTGCAGTTGGGACTGAAGCAGCCCCGGCGAAAACCGCGTGGCTTTTTTTT TTTTTTTTGAGGGGG	518	1	y	3.7e-09	+++++++++++++++
chr18:5334293-5335086	151	CCAGCGCGCGGCGGGAGAcgccccgccccgccccgccctgccTAGACCTGCGCGCAAGCGCATACGGCCAACTGC	201	3	n	6.9e-05	+ + ++ + ++ ++
chr18:5334293-5335086	676	GGCTCCGGCCttttttttttttttttttttttttttttttttGCTGTCTCCTGCTGCAGAGCGGCCCCGCCCTCT	686	1	y	3.7e-09	+++++++++++++++
chr18:5334293-5335086	676	GGCTCCGGCCttttttttttttttttttttttttttttttttGCTGTCTCCTGCTGCAGAGCGGCCCCGCCCTCT	701	1	y	3.7e-09	+++++++++++++++
chr1:172500153-172502013	151	CGTGCGCTCTCATCCAGCCCTCTTGGACGGTGAGCAGGACTGAGGGACCAAGGCAGCGGGGTGGGAGTTGGGGAT TATGTGTGTGGTCTGTAGAAAGCAAGAAGCCAACACTTGAGACTTGCTTCTGGGAGCGTGGGGGTTGAAGACTGG	221	3	y	3.2e-05	+ + + ++++++++
chr1:172500153-172502013	451	CCCCAGCCGTTTGCTCCAGCGTTGAGTTCTCTTTGGGGGGAGAAGGAAGGAGGGCGTCGGACGTCCGCAGGCTGC	485	2	y	3.5e-05	++ ++ +++ + + +
chr1:172500153-172502013	1426	GCTTTGTCCTTCGAGATTGCCAGGTGTGGGCTTTTTAAGCaaaaaaaaaaaaaaaaaaaaaaaaaaaaaaGTCTT	1466	1	n	3.7e-09	+++++++++++++++
chr1:172500153-172502013	1426	GCTTTGTCCTTCGAGATTGCCAGGTGTGGGCTTTTTAAGCaaaaaaaaaaaaaaaaaaaaaaaaaaaaaaGTCTT	1481	1	n	3.7e-09	+++++++++++++++
chr1:172500153-172502013	1651	GCCTCCACCCAAGTCTGTGTGGAGTGGGTGTTCCTGCCCCGGGGGGGCCCCCACCCTGCCTCCATTCCCATGTTT	1705	2	n	1.8e-05	++++++++ ++
chr1:191417315-191417475	76	gacttttccttgatgatgtagctgcttgtaagttgtccaagttccgctaaaaaaaaaaaaaaaacctcctcacca	124	1	n	3.7e-09	+++++++++++++++
chr12:3309621-3310321	1	CGAGGGGCGGCGCCCGCGGCTCCGCAGCCTCTCCCAGCCGCTCCGCCCGGTTCCGGGGAGTCGGTCGGGACAAAA	28	2	n	7.3e-05	+++ + + +++ +
chr12:3309621-3310321	151	AGCGCGGCGGGCTTGAACACGGCCTCCGCCCGGAGCAGAAACCCCGCGCTAGGACACGGGCGAGGGCAGCGGGAG GTCTCGCGAGCCGACAAGCCCTGCTACATAACCCCAGGAAACAGAGCCGCCCCGGCCAGAGCCACCTTTTTCCCC	212	2	y	7.3e-05	+ +++++ ++ +++
chr12:3309621-3310321	376	GCCCCTGCGGCCCGCCTCTGCGCACGCGCGCGGGCGGGCAAGTAGGGCACGCGGAGGCGGGACCAGAGGGGGCGA	428	2	y	9.4e-05	++++++ + +++
chr12:3309621-3310321	676	CTGGCtgtgtgtgtgtgtgtgtgtg	682	3	y	7.7e-10	+++++++++++++++
chr2:120353073-120353290	151	GTGGTAGAAGAGAAACTGATCTTTttttttttttttttaaagatttatttatttgttttatttatat	172	1	y	3.7e-09	+++++++++++++++
chr2:120353073-120353290	151	GTGGTAGAAGAGAAACTGATCTTTttttttttttttttaaagatttatttatttgttttatttatat	194	1	y	2.6e-07	+++ +++ +++++++
chr3:87960988-87961250	151	GCGGTAGCTCTCTGAAGCACAGCTGAGGGgttttttgttttgttttttgatttttgtttttttgtttgttttGCT	182	1	y	3.4e-07	+++++ ++++ ++++
chr3:87960988-87961250	151	GCGGTAGCTCTCTGAAGCACAGCTGAGGGgttttttgttttgttttttgatttttgtttttttgtttgttttGCT	207	1	y	1.5e-08	+++++++++++++++
chr6:22356015-22356427	376	CCTTCAGTcacacacacacacacacacacacacacac	384	3	n	7.7e-10	+++++++++++++++
chr1:161766831-161767546	76	GCCTCTGCaaaaaaaaaaaaaaaaaaaaaaaaaaGCCTGCAAGGGCTCAGCTGCTCTTCTTTACCTGTCCTGTCA	84	1	n	3.7e-09	+++++++++++++++
chr1:161766831-161767546	376	GCAGTGACGGCATTCTAGACTTCTTTTCTCTTTTCATTTCCTGTCTATATTTTGAAATAGTCTGTCCTTATCTCT CACTCCCTAACCTCAGAATCACTTCCTAATCCTAAATACTAATTCTCCATCTACGCCCTCTTACTGAAACTATCT	442	2	n	8.3e-05	+ + ++++ ++++
chr14:61681083-61682716	451	TCCCACCTCTCCCGCCTCCTCTCCCCAACTTTCGCCCTCCCTGCTCCCTCACCGCTGTCAACAGCGCCAGCTCCG	452	2	n	3.5e-05	++ +++++ ++ ++
chr14:61681083-61682716	826	CTCCTGGAGCCCCTCACTCTCTTCGCTCCGTGCACGCCGGGGTTACAGCTTTGCTTTTTTTTTTTTTTTTTCCTT	880	1	y	3.7e-09	+++++++++++++++
chr14:61681083-61682716	901	CTGTCGCTGCTGCTCCTCGTTCTATTTCCTTAccgccccccgcccccgccccggTTCCCTTCTAAAAGTGGAGGC TGGAGGAGGGAGAAAAGCAGCCTAGAGTCGAAAGGGGCGGTGCGCACTGACCTGTCAGCGACGGAGGAAGACCCC	970	2	y	3.1e-06	++++++ + + +++
chr14:61681083-61682716	1351	GAAAAGCCCCAGCACACGACCTAAGTACACAGCGCGCCAGCCGCCCGCCCCCGGGCCTCCTGCTCGCCACTTCCC CCTCCCCCCGCCCGGGCCCGAGCGCTGCCAACCCCGTCACGTGCCCTCTCGGGAAAACCAGCTCCCCGGGGCTGT	1420	2	n	4.3e-05	+ + ++ ++ ++ ++
chr2:26594199-26594390	76	CAAGAACGCTACCCTGagccgggcagggtggcgcacgcctttaatcccagcacttgggaggcagaggcaggcaga	132	2	y	4.3e-10	+++++++++++++++
chr12:51865846-51866698	226	GTGTCACCTGACATTCATGTGTATGTGTGTTCTGAGGTCTGCTAAGGAACTCAGCAGTACTGTCTATCTAGATCT	240	3	y	7e-06	+++++ ++++++
chr12:51865846-51866698	376	GTAAGCCTGTTAGGTGCAGCTCTTTACTATCCTTAATTGAGTGCCACCGTGTCTCTCTGATGCtgtgtgtgtgtg tgtgtgtgtgtgtgtgtTCTGTCTGCTTGCCTGGAGGGGCCCTGGTTGCCGTGTGCACGAGGGAACATCAGAAAT	440	3	y	7.7e-10	+++++++++++++++
chr19:23135237-23136026	1	GGGGATGCATAGGCTTATAAATGAAAGGGACACCGGGTCGAAATACTGCTTGAGTGTGTGCATAGCTTTTGTGGG	50	3	y	3.5e-05	++ +++++++ +
chr19:23135237-23136026	76	GTAGGGGAGGGCAAGGAACGACATTAATTTTTTTTTTCTTTTTAAGCCGGGTGGCTGGGTCATCGTAGGAAAGAT	104	1	y	1.6e-07	+++++++++ +++++
chr19:23135237-23136026	226	GCCCAGGGACAGCAACACCAGCCACCCCACCTCTCTTTTCCTCCCCCACCCCCGCGCCTTGCACGCAGGGCCCAG	255	2	n	5.4e-06	+++ ++ + +++++
chr19:23135237-23136026	451	CCATGGTACCTCAGGGATTAAAAAAAAAAGAAAGAAAGAAACATCGCTAGAGTTACGAAACAGGGAGGCGCGCTC	469	1	n	5.1e-06	++++++++++ +++
chr5:145204052-145204678	151	CTGCGGTGGGTGGGTGGGTGAGGCTGTGCTCGACCAATCAGAGGAGAGAGAGGGTGGACCTATTTTGTTTGTTTG TTTTCCCCGACCGGCCCCCTAGATTCCTACCCTTGAGCTAAGCCCATGCTCTGGTTTTGGGGGTGGGAAATAGAT	193	2	y	8.5e-06	++++ +++++ ++
chr5:145204052-145204678	151	CTGCGGTGGGTGGGTGGGTGAGGCTGTGCTCGACCAATCAGAGGAGAGAGAGGGTGGACCTATTTTGTTTGTTTG TTTTCCCCGACCGGCCCCCTAGATTCCTACCCTTGAGCTAAGCCCATGCTCTGGTTTTGGGGGTGGGAAATAGAT	214	1	y	4e-08	+++ +++++++++++
chr5:145204052-145204678	451	GGGGGTGGGATTTATGGCTGAAGCTCGTACTTGGTTACTTCCGGCGATGAACTGTTGGAAAGTGTCGGACTTGCC TCTCTCTTGGCTTGTGAGAACTCCATCTTCCAAGCCTGGGCTGCGGGGAGTTTGATCTTTGGGTCCCCGGGACTT	520	2	n	8.9e-05	+ +++++++ ++
chr18:39666462-39666607	76	CACCTTGGGTGGCATGGAGGTGGGGCTtgtgtgtgtgtgtgtgtgtgtgtgtgtgtgtgtgtgtgtgtgt	104	3	y	7.7e-10	+++++++++++++++
chr18:39666462-39666607	76	CACCTTGGGTGGCATGGAGGTGGGGCTtgtgtgtgtgtgtgtgtgtgtgtgtgtgtgtgtgtgtgtgtgt	120	3	y	7.7e-10	+++++++++++++++
chr12:86833783-86834143	226	CCCAGCATGCCCCCCCTGTCACAGATTCTGGTCACACTGCCACTaaagaaaaaaaaaaaaaaaaaaaaagaaTGA	274	1	n	3.7e-09	+++++++++++++++
chr6:128843162-128843391	151	ggatttgctgaaggaggcagaggcaggaggatctggagttcgaggacagcctggtctacacgctttttTTCTCTC	163	2	y	4.3e-10	+++++++++++++++
chr8:83740101-83741364	301	CTGGCACGGAGACAGCAGGGGACAGACTGGGGCAGGGGGAGTTCCCACCCTCGAAGAAATGGGCACCCTCACGTG	322	2	y	2.4e-05	++ + + ++++++
chr8:83740101-83741364	376	GGTTTCTCTTCACATTGAGAGCGTCTGTTTGGGCAACAGTTTGCAAAGTGTACTTTAACCTACAGTTCTTTTTAG CTTTTTTTTTTTTTAAACTGTATGTGTTTTGCCTGCATGTATGtttgtgcactgcatgtattattgtacactgca tgtatgtctgtgcactgcatgtctgttgcccgtggatgcagaagacagtgtgaatccccaggaactggagttaca	447	1	y	4.4e-06	++ ++++++++++
chr8:83740101-83741364	376	GGTTTCTCTTCACATTGAGAGCGTCTGTTTGGGCAACAGTTTGCAAAGTGTACTTTAACCTACAGTTCTTTTTAG CTTTTTTTTTTTTTAAACTGTATGTGTTTTGCCTGCATGTATGtttgtgcactgcatgtattattgtacactgca tgtatgtctgtgcactgcatgtctgttgcccgtggatgcagaagacagtgtgaatccccaggaactggagttaca	487	3	y	2.2e-05	+++ +++ ++++
chr8:83740101-83741364	376	GGTTTCTCTTCACATTGAGAGCGTCTGTTTGGGCAACAGTTTGCAAAGTGTACTTTAACCTACAGTTCTTTTTAG CTTTTTTTTTTTTTAAACTGTATGTGTTTTGCCTGCATGTATGtttgtgcactgcatgtattattgtacactgca tgtatgtctgtgcactgcatgtctgttgcccgtggatgcagaagacagtgtgaatccccaggaactggagttaca	525	3	y	1.2e-05	+++ +++ ++++
chr8:83740101-83741364	676	ccagcctcTAGCCTGCATTTCTTTTTCttttgttcttttgagacagggtcttgctgtgtagcacaagctgacctg	700	1	y	6.7e-06	++ +++++++ ++++
chr8:83740101-83741364	751	aaattggtgaccctgctgcctcagcctccctaatgccctgtgacaccatgcctgcTTTGTTACCCTCTTTAACTG	765	2	n	1.5e-07	+++++++ ++++++
chr8:83740101-83741364	826	CCCCCGTGCCTCAGTTTCTCCCTCTTAGTCTCCAAACTGGCAACACTCAAGCCCATTAGGATCTGACACCCCCTG	830	2	n	2.5e-05	+ ++++++ + ++
chr8:83740101-83741364	901	GAGAGCCCTCTGGGGCGCACAGGTGCGCCGGCTTCGACTGTCCCTGCCCCTCCTGGCCACGTCCCGCGAGTTCCC	937	2	n	3.5e-05	+++ + +++++ +
chr8:83740101-83741364	1126	AGGGCCCTCCCCGGAACTGTCCTCCCCGCTGGAAAGTAACAGGAAAGTGCCGGGGAAACAGACCCAGGGCGCGCC	1179	2	y	5.7e-05	+++ ++++ ++++
chr8:83740101-83741364	1201	GCGCGCCCGCGTCTGGAACAAACGCAACATTCCTccccccccccccccgcgcgcggctccgac	1232	2	n	4.6e-05	+++ ++ + ++ ++
chr9:44986386-44986816	376	ATATTGGGGCTCAGAGGgtgtgtgtgtgtgtgtgtgtgtgtgtgtgagtgagaga	393	3	y	7.7e-10	+++++++++++++++
chr9:44986386-44986816	376	ATATTGGGGCTCAGAGGgtgtgtgtgtgtgtgtgtgtgtgtgtgtgagtgagaga	411	3	y	4.5e-06	+++++++++++ +++
chr17:35134932-35135677	226	AGGGGGGCGGGGAAGTACTTAGAGTGTGCGCACGCGTGGCGCCGCTCACGCAGGCGCAGTGCGGTCCCCCGGGCG	249	3	y	6.2e-06	+++++ + + +++
chr17:35134932-35135677	301	ACGACGGCGGCGGCGGCGGCTCCTCCGGGTGGTCGGCTCCCTCCCATCTCGGCCGGCCCGGGCCCGTCTCGCCCC CCAGAAACTCACTGTTCGGGGCTGTGGACTTTCTCATCGTGCCCCACGAAAGTAAATCGGGGGAGACTGGGGGAG CCGGAAGTACCGCCTCGAGATCCCCCCAAATACGATCGGGGAAACGGAAGTGGCCCTTGGTGCCAGGTTGGGGGA	363	2	n	5e-05	++ + +++ ++ ++
chr17:35134932-35135677	301	ACGACGGCGGCGGCGGCGGCTCCTCCGGGTGGTCGGCTCCCTCCCATCTCGGCCGGCCCGGGCCCGTCTCGCCCC CCAGAAACTCACTGTTCGGGGCTGTGGACTTTCTCATCGTGCCCCACGAAAGTAAATCGGGGGAGACTGGGGGAG CCGGAAGTACCGCCTCGAGATCCCCCCAAATACGATCGGGGAAACGGAAGTGGCCCTTGGTGCCAGGTTGGGGGA	437	2	y	3.5e-05	++++ + + ++ ++
chr17:35134932-35135677	526	GACCGGAAGTGACGGTACCGTGGGGACGTCGGGGGCGGAGCCACAGGGTGGTGGGCTGTGTATGTGTGTTTGTAT	583	3	y	9.6e-08	++++ +++++++ ++
chr17:35134932-35135677	601	GTGTTTGGTCGCGTGTTGGTTAAGTCGTGTTGCTGGAATACCGAGGAGAGGCGGAGGCGGAAGGCGGGGGCGGTC	647	2	y	4.3e-06	+++++ +++++ +
chr11:70654023-70655198	1	TGCAGCGCGTGCCCGCCCCGCCCTGGAGGAGGCGGAAGTgggccgccgcaccggccgccgcgcccctccccgccc	28	2	y	1.5e-05	++++++ ++ + ++
chr11:70654023-70655198	226	GGCCTCCCGCTGCCCTCGCTCGCCTGCGCCCGCCCCCACCCCAGTCCCCCAGAGGGTCTAAGGCCGGTCACTGCT	228	2	n	7.3e-05	+++ ++ +++++ +
chr11:70654023-70655198	226	GGCCTCCCGCTGCCCTCGCTCGCCTGCGCCCGCCCCCACCCCAGTCCCCCAGAGGGTCTAAGGCCGGTCACTGCT	248	2	n	6.1e-05	+++++ + +++ ++
chr11:70654023-70655198	601	CCGCCACTTCCTGCTCCTCCCCCCCCCCTCTAGATTTTTATTTGCAAAGGGCGGCGGGGCGGGGCCTGCGCCCCA TTCCCTCCCTCCATCCTCCCCCCCCCCCCGCCGGGCCAGATAGCGAACTTTTGCAAATGCAATTTTTAAAAAACC	610	2	n	9.2e-06	+++++ ++ ++ ++
chr11:70654023-70655198	601	CCGCCACTTCCTGCTCCTCCCCCCCCCCTCTAGATTTTTATTTGCAAAGGGCGGCGGGGCGGGGCCTGCGCCCCA TTCCCTCCCTCCATCCTCCCCCCCCCCCCGCCGGGCCAGATAGCGAACTTTTGCAAATGCAATTTTTAAAAAACC	673	2	n	7.8e-05	++ + ++ +++++
chr11:70654023-70655198	601	CCGCCACTTCCTGCTCCTCCCCCCCCCCTCTAGATTTTTATTTGCAAAGGGCGGCGGGGCGGGGCCTGCGCCCCA TTCCCTCCCTCCATCCTCCCCCCCCCCCCGCCGGGCCAGATAGCGAACTTTTGCAAATGCAATTTTTAAAAAACC	690	2	n	4.6e-05	+++ ++ + ++ ++
chr11:70654023-70655198	826	AGAGGTTAAGGTTAGGGCTCGCTCCGATTCATCCTGAATACCACTTGGCTATAGAAGGAGGAAGCCAGAGGAAGC AGGGaaagaaaaagaaaaaaaaaaaaaaaagaaaaTTAGTAAGGTTGAGCAAGTTGAAGTGGGTTCGGGGAACCC	895	2	y	1.5e-05	+++ ++++ + ++
chr11:70654023-70655198	826	AGAGGTTAAGGTTAGGGCTCGCTCCGATTCATCCTGAATACCACTTGGCTATAGAAGGAGGAAGCCAGAGGAAGC AGGGaaagaaaaagaaaaaaaaaaaaaaaagaaaaTTAGTAAGGTTGAGCAAGTTGAAGTGGGTTCGGGGAACCC	915	1	n	3.7e-09	+++++++++++++++
chr15:79347466-79348243	376	GGCGCCCCCTTAACATCAGCTCCCGGAGGGGCCTCCGAGGGGCTGGCTGGGAGGCGGTGCGCGGGCCCCGGAGGA AGCCggggcgggggcgggggcggggCGTGCACGTACGTGACTCGGTGAGAACAGTCCCTGGAGCCGCGCCCAGCA	448	2	y	1.4e-05	+++ ++ + +++ ++
chr15:79347466-79348243	526	CCTTGTGTGCGCGGTTTGTTTACGTCTCCCGGTGGCGTGCGTGCGGCTGTGTTCTTTGGGGAGCGTCCTGAGTTC	562	3	y	2.7e-05	+++ +++ + ++++
chr15:79347466-79348243	601	TGCGGGCTGCGTGCACACGGTGTACTTCGGGGTGTGTGTTTGTGTGTGTGGCCGCACGCGCTCCTTGGAGACTGA	636	3	y	9.7e-09	++++ ++++++++++
chr10:70096794-70097233	1	TGTCCCGGCACCTGCGGGGCTGGCGCTGCGTGGGGTCCGCCTTTCTCCGGAAGAGGCGGCGCGGCGCGGCGGTGT ATGTGTGTGTGTTGGGGGGCTGGGGCCCGGGGACGCAGGGGACCCTCCGGGGCGGGAGCACGTGCGCGGGGAGGC	72	3	y	3.3e-09	++++ ++++++++++
chr10:70096794-70097233	151	GGCGGGGGCTCGAGCGTCTGTGTGCAGCTGCTAGGAGAGCGCTGGGGCTGGGGCTTTGCGGGGACGGCCCCGCGG	160	3	y	8.9e-05	+ + ++ ++++++
chr10:70096794-70097233	301	GCGGCCGCGGGAAGCGCCCTCTCTTTCTCCGCCGCCGCCGccgcgcgtctgcgccctgccgcccgcccgcgccgc	322	2	n	5.3e-05	++ +++ +++ ++
chr5:32135063-32136020	151	CGCACTGAGCCGCCCGTCTCGTCTTCAGGGCTGCGAttttttttttttttttttttttttccttttCTAAAACCC	187	1	y	3.7e-09	+++++++++++++++
chr5:32135063-32136020	151	CGCACTGAGCCGCCCGTCTCGTCTTCAGGGCTGCGAttttttttttttttttttttttttccttttCTAAAACCC	202	1	y	7.2e-06	+++++++++ ++++
chr5:32135063-32136020	226	GGAGCCCAGGCCGGCGCGGCCGCTTTcggggccccgccccgcgccccTTCCTTTTGGTTGGGGATGGAGGGGAGG AGGTAGGGAGGCCAGGGCGCAGGCGGGAGCAGGCGAGGGAATCCCTCTCCCTCCACGTCACCCGAAGGCGAGGAA	293	2	y	4.6e-05	+ ++ ++++ +++
chr5:32135063-32136020	226	GGAGCCCAGGCCGGCGCGGCCGCTTTcggggccccgccccgcgccccTTCCTTTTGGTTGGGGATGGAGGGGAGG AGGTAGGGAGGCCAGGGCGCAGGCGGGAGCAGGCGAGGGAATCCCTCTCCCTCCACGTCACCCGAAGGCGAGGAA	319	2	y	2.9e-05	+ ++++ + +++++
chr5:32135063-32136020	226	GGAGCCCAGGCCGGCGCGGCCGCTTTcggggccccgccccgcgccccTTCCTTTTGGTTGGGGATGGAGGGGAGG AGGTAGGGAGGCCAGGGCGCAGGCGGGAGCAGGCGAGGGAATCCCTCTCCCTCCACGTCACCCGAAGGCGAGGAA	340	2	n	6.1e-05	+ +++++ +++++
chr5:32135063-32136020	601	AGGGGAGCGCCCCGCccgccttctcccctcccctcccgcgcctcttcctcctcctccttgtcccaggcctcctcc	643	2	n	1.2e-05	++ ++++ +++++
chr5:32135063-32136020	826	GAGACAGTGAGCGGCGCTCGGCAGGGACagagagagagaaagagagcgagcgcaagaaagagggggagagagGGG AGGGCGAAGCGAGGCGAGAAGCGCGAGGCTTGGCAGGTCCTGGAGCCAGCACGGGGT	848	2	y	2.1e-05	+ + +++++ ++
chr5:32135063-32136020	826	GAGACAGTGAGCGGCGCTCGGCAGGGACagagagagagaaagagagcgagcgcaagaaagagggggagagagGGG AGGGCGAAGCGAGGCGAGAAGCGCGAGGCTTGGCAGGTCCTGGAGCCAGCACGGGGT	884	2	y	9.9e-06	++++ +++ +++
chr5:32135063-32136020	826	GAGACAGTGAGCGGCGCTCGGCAGGGACagagagagagaaagagagcgagcgcaagaaagagggggagagagGGG AGGGCGAAGCGAGGCGAGAAGCGCGAGGCTTGGCAGGTCCTGGAGCCAGCACGGGGT	899	2	y	8.9e-05	+++++ ++ ++ +
chr6:91683805-91684245	76	AGGATGGGTGCGCGCGCTCGACGAGGCGAGCTCCGGCTCTTTGTGTGTCCGAGCTCgtgcgcgcgtgcgtgcgtg tgtgtgtgtgtgtgtgtgtgtgtgtgtgtgtgtgcgcgcgcgcgcgcgcgccccgTGTGTGGGCGTGGCCGACAG	148	3	y	7.7e-10	+++++++++++++++
chr6:91683805-91684245	76	AGGATGGGTGCGCGCGCTCGACGAGGCGAGCTCCGGCTCTTTGTGTGTCCGAGCTCgtgcgcgcgtgcgtgcgtg tgtgtgtgtgtgtgtgtgtgtgtgtgtgtgtgtgcgcgcgcgcgcgcgcgccccgTGTGTGGGCGTGGCCGACAG	164	3	y	7.7e-10	+++++++++++++++
chr6:91683805-91684245	76	AGGATGGGTGCGCGCGCTCGACGAGGCGAGCTCCGGCTCTTTGTGTGTCCGAGCTCgtgcgcgcgtgcgtgcgtg tgtgtgtgtgtgtgtgtgtgtgtgtgtgtgtgtgcgcgcgcgcgcgcgcgccccgTGTGTGGGCGTGGCCGACAG	180	3	y	1.5e-05	+++++ + + + + +
chr6:91683805-91684245	76	AGGATGGGTGCGCGCGCTCGACGAGGCGAGCTCCGGCTCTTTGTGTGTCCGAGCTCgtgcgcgcgtgcgtgcgtg tgtgtgtgtgtgtgtgtgtgtgtgtgtgtgtgtgcgcgcgcgcgcgcgcgccccgTGTGTGGGCGTGGCCGACAG	203	3	y	5.4e-05	+++++++ + +++
chr7:102258270-102258470	76	CTAAACCTTTCTAAGCAGATCTGAAGGgtgtgtgtgtgtgtgtgtgtgtgtgtgtgtgtgtgtgtgtgtgtgtgt	103	3	y	7.7e-10	+++++++++++++++
chr7:102258270-102258470	76	CTAAACCTTTCTAAGCAGATCTGAAGGgtgtgtgtgtgtgtgtgtgtgtgtgtgtgtgtgtgtgtgtgtgtgtgt	119	3	y	7.7e-10	+++++++++++++++
chr7:102258270-102258470	76	CTAAACCTTTCTAAGCAGATCTGAAGGgtgtgtgtgtgtgtgtgtgtgtgtgtgtgtgtgtgtgtgtgtgtgtgt	135	3	y	7.7e-10	+++++++++++++++
chr4:33467074-33467255	1	TAGGCTGGTTGGCAGGCACACAGGCAGACATAGGCACACACACAGGCCTGCAGATAAACACACACAAGAAGGCTG	29	3	n	3e-06	++ + +++++++++
chr4:33467074-33467255	1	TAGGCTGGTTGGCAGGCACACAGGCAGACATAGGCACACACACAGGCCTGCAGATAAACACACACAAGAAGGCTG	56	1	n	7.2e-06	+++++ +++ ++ ++
chr11:69015979-69016249	1	acggcaagttcACCGCAAAAGGTCCCTGACGCCCCAGTACCCTGGTGGATGCAGAGGGAAGAGGCAGTGCTGCTC	47	2	y	2e-06	+++ +++++++ + +
chr11:69015979-69016249	151	ATCATGGCTGCTTGCCGAGCACAACCACCTACCTCCGTGAGTGCTGTTTGTGTGATTCTCGTGGGTTTTTTGTTT TGTTTTCCCTTCTTGTCCTGAATTTCTTTTCTTCCTATACTCCTT	217	1	y	3.4e-07	+++++ ++++ ++++
chr12:3781611-3781861	151	GGTGCTACTCATGCATCCTGTCCTGGGGTCCTGTGGAACATGTGATCGCCAAGTCCCATTCACATTGATTTTCCT TTTTTTTTTTTTTTTCTTGCTCCCT	225	1	y	3.7e-09	+++++++++++++++
chr12:85818642-85818810	1	AAACCTTGAGCCCCCTCTAGCGGCCAGAACTGGGTATGGCATCATCTAGACAAGATGTCTCATTCCtgtgtgtgt gtgtgtgtgtgCGCGCGCGAGCGTGCATTTttaaatgcaggcttattgtaaagctgctaagctgctcttggtcaa	68	3	y	7.7e-10	+++++++++++++++
chr12:85818642-85818810	1	AAACCTTGAGCCCCCTCTAGCGGCCAGAACTGGGTATGGCATCATCTAGACAAGATGTCTCATTCCtgtgtgtgt gtgtgtgtgtgCGCGCGCGAGCGTGCATTTttaaatgcaggcttattgtaaagctgctaagctgctcttggtcaa	86	3	y	9.3e-05	+ + + + + + +++
chr1:171102110-171102899	301	gggagaccggggttcgattccccgacggggagATACAGTAGCttttttttttttttttttttttAAATAAATAGC	343	1	y	3.7e-09	+++++++++++++++
chr1:171102110-171102899	526	CAACACGCTACCCTCAGCCCCCCGCCGCCCCTAGCGAGCCCTCCCATCCCAACCCCAACCGCGGTGAGCTCCGGG	533	2	n	4.1e-05	+ ++++ +++ ++
chrX:102157077-102157357	151	GGGTTTTTTTTTTTTTTTTTTTGGAGGGGGGGGGGGCTGCTGATTCACGTGACCGGTGGTGGTTTCAGTTCCGTC	154	1	y	3.7e-09	+++++++++++++++
chr6:86487394-86487826	151	CCCTCTTCCTCCGCCCCCACTGTCCCTCTGTGAGCACGAAGAGGGCCTCATGGCAAACATGCAGTGCCTGCACAC	154	2	n	7.3e-06	++ ++++ +++ ++
chr6:86487394-86487826	226	CCTCCGTGAGGCCCCACAACAGAGTACACACACAAACACTGCCTGCAGGCGCACATCACACAGTGATATAGCTCA	250	3	n	1.7e-07	+++++++++ ++++
chrY:90744368-90744879	151	CGAGGCAGAGAACCGGGGGTGCACTTGCGTGTTTTTCGCCACCGGGTGGCCCCGGAGATCGGCGCTGGGCCCTAG	167	3	y	9.8e-05	+ +++ ++ +++
chrY:90744368-90744879	376	GCTTCCCCTCACCCTGGCCGGGATGAAGCAGGCAGATCCGACCCCTTGGAGGAAGTTTTTTTTTTTTTTTTCCCG	431	1	y	3.7e-09	+++++++++++++++
chr5:86085139-86085366	151	GCTTTATTTGACATTCCTCATTCCTGAGTCCCAAGAGCATGGGACTAGACAacacacacacacacacacacacac	203	3	n	7.7e-10	+++++++++++++++
chr12:108757934-108758348	226	GTAGTCTGCTCTGTGGCTCCGCCTGGCTTCCTCCCTGCTAACTGCACTTCAGTAGCAGTGCATGCTGGGCtgtgt gtgtgtgtgtgtgtgtgtgtgCTGCGCTGTGCTCCCTCGGGATTTTTCTGGTACCATACAGAACTGCTTTTCAGG	297	3	y	7.7e-10	+++++++++++++++
chr2:32189453-32189602	76	tgtcatggtgCTTGGTACTGgtgtgtgtgtgtgtgtgtgtgtgtgtgtgtgtgtgtgtgtgtgtgtgtAAAAAt	96	3	y	7.7e-10	+++++++++++++++
chr2:32189453-32189602	76	tgtcatggtgCTTGGTACTGgtgtgtgtgtgtgtgtgtgtgtgtgtgtgtgtgtgtgtgtgtgtgtgtAAAAAt	112	3	y	7.7e-10	+++++++++++++++
chr2:32189453-32189602	76	tgtcatggtgCTTGGTACTGgtgtgtgtgtgtgtgtgtgtgtgtgtgtgtgtgtgtgtgtgtgtgtgtAAAAAt	128	3	y	7.7e-10	+++++++++++++++
chr7:97081497-97082683	76	AGGCGCCCTGGTGGGGCTGTGTGTGTGTGTGTGTgcgcgcgcgcgcgcgcggccggagggcggggggggggggTG	94	3	y	7.7e-10	+++++++++++++++
chr7:97081497-97082683	76	AGGCGCCCTGGTGGGGCTGTGTGTGTGTGTGTGTgcgcgcgcgcgcgcgcggccggagggcggggggggggggTG	130	2	y	8.3e-05	+++++ + ++ ++
chr7:97081497-97082683	451	gggcggccgggGGCTGTCCCGCGGCCTCGGAGATGGGGGCGCTGAGAGAggccgggcgcggcgagccggggcccc	487	2	y	3.5e-05	++ ++ +++ +++
chr7:97081497-97082683	751	AggggccgcgcggccccgggcccACAAAGGGCGAGGCGCCGGCGCCCCTCTCCCGGTCCCTTTCTCTGTCCGCCC	809	2	n	5.7e-05	+++ +++++ + +
chr7:97081497-97082683	901	CTTGTATTAAGTGACTCATTTGTTTGTCCCCCTTCTTTCCCATTATTCCGAATGTTTCTCACATACCCCCCCCCC CCACACACACACACCGCGGTCCTCCGCCCCACGGGGTGACACTGCAGTTTGGTCCTCAATAACTGGCCAGAGTTT	975	3	n	4.7e-07	+ +++++++++++++
chr4:12087883-12088079	76	CAGTCTCCAGCTCCCCAGCAGCCTCCTCGGTGAGTCCGCTGAGCTGATTGGACAACAGGGTTCAGaaaaaaaaaa aaaaaaaaaaaaaaaaaCTCAACCTTGCGACGCCTGGTTGCTAGGT	141	1	n	3.7e-09	+++++++++++++++
chr4:12087883-12088079	76	CAGTCTCCAGCTCCCCAGCAGCCTCCTCGGTGAGTCCGCTGAGCTGATTGGACAACAGGGTTCAGaaaaaaaaaa aaaaaaaaaaaaaaaaaCTCAACCTTGCGACGCCTGGTTGCTAGGT	158	1	n	1.3e-06	++++++++++ ++
chr7:30419637-30420478	1	TCCTCTCTGTGCCTCTGACAGCAGATGGCAGCCTTTCTGTCCCCTCAACCCCAGCACTGGCTTCACCTGGGAGCA GAAGCAGGAACAGGAGGTAGCCTGGGGGGTCCATGCTGGGCTGGGACCTGAAGGGATCTGGCCAAAACTGTGGTC	2	2	n	5.4e-06	+++ ++ ++++++
chr7:30419637-30420478	1	TCCTCTCTGTGCCTCTGACAGCAGATGGCAGCCTTTCTGTCCCCTCAACCCCAGCACTGGCTTCACCTGGGAGCA GAAGCAGGAACAGGAGGTAGCCTGGGGGGTCCATGCTGGGCTGGGACCTGAAGGGATCTGGCCAAAACTGTGGTC	69	2	y	6.7e-07	++ +++++ +++++
chr7:30419637-30420478	151	CAGGGAAGTCCTCAGAACAGTAGAGGAGAAGAGAGGCAGCTAGGACGGATGTCACCCCGATGGTGACAATGCTAC	172	2	y	9.4e-05	++++ ++ +++
chr7:30419637-30420478	226	CTACTTCCTGTGTGGGTGCATGTGTGTCAAGACTTCCTTTGGAGAACAAATATGGGGGAGTCAGAGCCCAGAGAA	237	3	y	4.9e-06	+++ +++ ++++++
chr7:30419637-30420478	301	GCTTCCGTGATCATCTCGGTGGAGTGGCAAGAGGACCATGGTGTGGGCACCAGGGAgattatggaaataagctgg aggtagagccaacaacacttggggaggagggggggtgtgtttgagaaaggggatcatggtgactgtcgttcccag	374	2	y	5.3e-05	+++++ ++++ ++
chr7:30419637-30420478	451	cctgagcgagattagaagagtggagagtgggttgaaagatagtgaggaagcactggttaaggagggagagaaggg	511	2	y	9.2e-06	+++++ ++++ ++
chr7:30419637-30420478	676	catagactgggtgagattgttaaagAGATACACACACATGCACACTGCCAGAGAGTGCAAGGGAAGCTGAGGGCA	706	3	n	8.7e-08	++++++++ +++++
chr5:124862462-124862843	76	GCGGGAACGCGCGTGCGTGCGTGTGTGGGCGGGGACTTTGAGACGCCCCGGGACGCATGCGTGCGATGCCCTCCT CCTTCTCCCCGCCCCTCCCATGGGAGGGAATGGGGCTGGCCGGCCTGGCGCGTGCGCACGCGCGCCGTCTTTCCC	88	3	y	4e-08	+++ +++ +++++++
chr5:124862462-124862843	76	GCGGGAACGCGCGTGCGTGCGTGTGTGGGCGGGGACTTTGAGACGCCCCGGGACGCATGCGTGCGATGCCCTCCT CCTTCTCCCCGCCCCTCCCATGGGAGGGAATGGGGCTGGCCGGCCTGGCGCGTGCGCACGCGCGCCGTCTTTCCC	148	2	n	8.9e-05	+++ + +++ ++ +
chr5:124862462-124862843	226	CTCCCACCACCCCCATCCTCCCGGAGGCGTCTGGGTGTGCGGAGCGCGCGCGCGCGGCTCGGAGACGCACCTGTG	232	2	n	7.3e-05	++ ++ + +++++
chr5:124862462-124862843	301	AGGTGTCTCCCTCGGAAGGAGAGAGAGAGGGCGGCCCGGGGTGGGCGCGCGCGGAGTCCGAGGCCTGGACGCGCT	314	2	y	6.7e-06	+++ + ++++ ++
chr7:47007983-47008735	301	TCTAATGCCGTGTACCGCCCCCGCGCTGCCGCCGAATACGAAGTATGTGTGTGTATGTATacacacatacacaca cacactcacacacacacGCTCAGCGCCTCCGCAGCGCTCGCAAGTATTTGCGCAACTTCCGCTTTCGGAGATAAG	343	3	y	9.6e-08	++ +++++++++ ++
chr7:47007983-47008735	301	TCTAATGCCGTGTACCGCCCCCGCGCTGCCGCCGAATACGAAGTATGTGTGTGTATGTATacacacatacacaca cacactcacacacacacGCTCAGCGCCTCCGCAGCGCTCGCAAGTATTTGCGCAACTTCCGCTTTCGGAGATAAG	362	3	n	1.7e-09	++++++ ++++++++
chr7:47007983-47008735	301	TCTAATGCCGTGTACCGCCCCCGCGCTGCCGCCGAATACGAAGTATGTGTGTGTATGTATacacacatacacaca cacactcacacacacacGCTCAGCGCCTCCGCAGCGCTCGCAAGTATTTGCGCAACTTCCGCTTTCGGAGATAAG	382	3	n	5.6e-07	+++++++++++ + +
chr7:47007983-47008735	601	GGGTTTCAGTGTGAGATCCGGGGAGGGTGGGGTGGGAGGGGGGGGGGTGGAGAAGAAGAGAGACCCGACCCCCTT	622	2	y	4.3e-05	+++++ + ++ ++
chr15:78982712-78983162	226	gacccggccctcgctcccattggtcctcccgccacccccgccGCTGTTTGCCCCGGCTTCTAAGCTGTCCATTGG	272	2	n	7.8e-05	++++ + ++ ++
chr15:78982712-78983162	301	TCCGCCCGGGTCCTCCCAGGAAGTTTGAAAAAAAAAAAAAAAAAGTTTTATGGGCGGATGGAAGGGGCCGGGGCA GCTCCGGGGAAGGGAAGGGCTGGAGCTACGGCGTCCGGCGGCCGAGAGGGGCGGTGGGCTGGGTGCGCCGCGGAG	328	1	n	3.7e-09	+++++++++++++++
chr15:78982712-78983162	301	TCCGCCCGGGTCCTCCCAGGAAGTTTGAAAAAAAAAAAAAAAAAGTTTTATGGGCGGATGGAAGGGGCCGGGGCA GCTCCGGGGAAGGGAAGGGCTGGAGCTACGGCGTCCGGCGGCCGAGAGGGGCGGTGGGCTGGGTGCGCCGCGGAG	363	2	y	9.4e-05	+ +++ + +++++
chr15:78982712-78983162	301	TCCGCCCGGGTCCTCCCAGGAAGTTTGAAAAAAAAAAAAAAAAAGTTTTATGGGCGGATGGAAGGGGCCGGGGCA GCTCCGGGGAAGGGAAGGGCTGGAGCTACGGCGTCCGGCGGCCGAGAGGGGCGGTGGGCTGGGTGCGCCGCGGAG	412	2	y	9.4e-05	++ +++ +++ ++
chr10:4787108-4787308	1	agcagctgtggtttctcctggtgcctctctccttggcttgcaccctgccacctccccctgtcctcacatgaccct ccctccgcctgcacactctcttcctctttttgtaaggacatcagttatactggattagggccttatcgttatgac	51	2	n	2.5e-05	+++ ++ +++ + +
chr10:4787108-4787308	1	agcagctgtggtttctcctggtgcctctctccttggcttgcaccctgccacctccccctgtcctcacatgaccct ccctccgcctgcacactctcttcctctttttgtaaggacatcagttatactggattagggccttatcgttatgac	73	2	n	3.1e-06	+++ ++++ ++++ +
chr10:4787108-4787308	151	cttgtttaagtctaattagctcttcaaatgtcctggtttttttttttttt	186	1	y	6.1e-07	++++++++++++++
chr11:60811170-60811498	151	GCATCCAGGTAGAGCCCGCCCCCAGCTGCCCACGCGCGATTCGCCCGCGCTCAGAGCAGGGCAAAGCCTGACGGA AAAAAAAAAAAAAAAAAAGAGCTCTGAACTGGAGGGGGTGGGAAGGAGGAGGGGACTGGGCGGTTCCTTACCTTG	225	1	n	3.7e-09	+++++++++++++++
chr3:59120676-59120852	151	AATTTGTGAGtgtgtgtatgtatgta	160	3	y	2.2e-08	++++++++ +++ ++
chr8:33731762-33732172	226	GGTCCGTGTTGGGCGTgcgcgccgcgacggcggcggggggcgggAAGCGGGCCCGCGGTGGGCGGgtgtgtgcgt gcgtgagtgcgtgcgtgcgtgcgGCCGAGGCGGAGGCTGGGAGGCGGCGCGGGCTGCGGGCGCTGAGGTAGGGAC	291	3	y	1.8e-08	+++++++ +++ +++
chr8:33731762-33732172	226	GGTCCGTGTTGGGCGTgcgcgccgcgacggcggcggggggcgggAAGCGGGCCCGCGGTGGGCGGgtgtgtgcgt gcgtgagtgcgtgcgtgcgtgcgGCCGAGGCGGAGGCTGGGAGGCGGCGCGGGCTGCGGGCGCTGAGGTAGGGAC	307	3	y	1.9e-07	+++ +++ +++ +++
chr8:33731762-33732172	226	GGTCCGTGTTGGGCGTgcgcgccgcgacggcggcggggggcgggAAGCGGGCCCGCGGTGGGCGGgtgtgtgcgt gcgtgagtgcgtgcgtgcgtgcgGCCGAGGCGGAGGCTGGGAGGCGGCGCGGGCTGCGGGCGCTGAGGTAGGGAC	326	2	y	1.3e-05	+++++ +++++ ++
chr8:33731762-33732172	226	GGTCCGTGTTGGGCGTgcgcgccgcgacggcggcggggggcgggAAGCGGGCCCGCGGTGGGCGGgtgtgtgcgt gcgtgagtgcgtgcgtgcgtgcgGCCGAGGCGGAGGCTGGGAGGCGGCGCGGGCTGCGGGCGCTGAGGTAGGGAC	358	2	y	1.7e-05	++ ++ ++++ +++
chr7:63911030-63912151	1	CAGCCCTGGTGGCAGGAAAGCCGCCCTGTCTTACTCACAGCTAGTTAGAAGCAGAAGCAGAGGGAGGGTCAGGGT	53	2	y	1.8e-07	++ +++++++ +++
chr7:63911030-63912151	76	ATGCTTTTTTAAACTTCCTCTTTTTCCAGTGTGGGGCCCCATGCGTGCAAACACGACACAATCACAGGGCTGCAT	115	3	n	2.2e-05	++ + ++ ++++
chr7:63911030-63912151	226	TATCCTTCATGCTGGACTTTCAAGTAAAAAAACCAAACCAAAACACCTGGCATTTAAATACGTAGGGTAGAGTAA	252	1	n	3.8e-06	++++++ ++++ ++
chr7:63911030-63912151	301	TGGGGTGTTCCAGAAAATCTTTCAAAACAACTGGGAGGGCGAGATGGGGTGGTGTTTGCGGGATGTTCCTCACTA	334	2	y	5e-05	+++++ +++ ++
chr7:63911030-63912151	676	AGACTATAAACCTGGGTGCTGTGGTCAGCAATTCTCAGGGGGTGAGGCAGGGCTGTGGGGGTATGACATTTTCCT	712	2	y	1.6e-06	+ ++ ++++++++
chr7:63911030-63912151	976	CTATTCTTGGTCTGTGTCTCCCTTTGGGGGGAGGATAAGGGTGGAAACGATCAGAAGCTAAAGTTAGCAAACTGC	1005	2	y	6.5e-05	+++++ +++ ++
chr15:9071064-9071444	151	AGAGCGGCCTCCCTGAAAGGGTGAAGAGGGAGGTGGGGCCGGGCCGAGAGGCCACTGCGCAGGCGCCCAAGAAAA	169	2	y	2.4e-05	++ + +++++ +++
chr15:9071064-9071444	226	CGGATAAACAAACAAATAAAACCCACTGCCCGGGGGCCAGCCCGGATCCCCgcctcccggggcctcccggggcct	231	1	n	8.2e-08	+++++++++++ +++
chr15:80088784-80089005	76	ctgtgggtactgcacatttaggccacacacatgatgcaggcaaaaaaaaaaaaaaaaaaaaaagaaagaaaaaaa	117	1	n	3.7e-09	+++++++++++++++
chr15:80088784-80089005	151	agaaaagaaaaaagaaaaaaaaCATATGCATAAAAATAACTAAAATGTTCAAAAGCTTTTAATTAAAAATA	158	1	n	7.3e-07	++++++ ++++++++
chr15:80088784-80089005	151	agaaaagaaaaaagaaaaaaaaCATATGCATAAAAATAACTAAAATGTTCAAAAGCTTTTAATTAAAAATA	180	1	n	6.8e-05	+ +++++ ++ +++
chr9:14275104-14276433	376	TTCCATCACAGGCAGGGATTGTGCTCTGCAAGTTTCTAACCAGAGGCCTCCCACAGGATTtgtgtgtgtgtgtgt gtgtgtgtgtgtgtgtgtgtgtgtgtgtgtgtATCAATCTCTGACTTGTTCATGATAAACGAACTTTCTTTGCTG	437	3	y	7.7e-10	+++++++++++++++
chr9:14275104-14276433	376	TTCCATCACAGGCAGGGATTGTGCTCTGCAAGTTTCTAACCAGAGGCCTCCCACAGGATTtgtgtgtgtgtgtgt gtgtgtgtgtgtgtgtgtgtgtgtgtgtgtgtATCAATCTCTGACTTGTTCATGATAAACGAACTTTCTTTGCTG	453	3	y	7.7e-10	+++++++++++++++
chr9:14275104-14276433	376	TTCCATCACAGGCAGGGATTGTGCTCTGCAAGTTTCTAACCAGAGGCCTCCCACAGGATTtgtgtgtgtgtgtgt gtgtgtgtgtgtgtgtgtgtgtgtgtgtgtgtATCAATCTCTGACTTGTTCATGATAAACGAACTTTCTTTGCTG	469	3	y	1.1e-08	++++++++++++++
chr9:14275104-14276433	1201	GCGGCGGGCCTCGGGGGCGGGGCCGCACTGAGAAGCTGAGACGGCCGCGGCTGCTCGTCCTGGCTGGCGGGGCGG	1231	2	y	9.4e-05	++ ++ +++ + +
chr10:12997252-12997429	76	TATTGCAACACCTGTACAAAGTGAAAGTCtttttattttttttttttttttgctttttttttttttttttttttt	111	1	y	3.7e-09	+++++++++++++++
chr10:12997252-12997429	76	TATTGCAACACCTGTACAAAGTGAAAGTCtttttattttttttttttttttgctttttttttttttttttttttt	129	1	y	3.7e-09	+++++++++++++++
chr2:31239399-31239520	1	tgcgtgcgtgtgtgtgtgACACACAAACATATATAGCCACCCCCCTACACACAcaagatacacatgttcgccact	4	3	y	8.8e-09	+++ +++++++++++
chr2:31239399-31239520	1	tgcgtgcgtgtgtgtgtgACACACAAACATATATAGCCACCCCCCTACACACAcaagatacacatgttcgccact	20	3	n	4.2e-06	++++++ +++ + +
chr10:80539026-80539482	151	GAGCCTTAAGGCCTGCAGCTTAAGGGCAGGAGAAGGATAGGACCAGGCGACAGGGGCGGGGCCTGGAGAAGGTGG	196	2	y	2.7e-05	++ + +++ +++ ++
chr10:80539026-80539482	376	AGCAAGAATTAATTGTACagccaggcgtagtggcatacgcctttaatcccagcactcgggaggcagaggcaggtg	434	2	y	4.3e-10	+++++++++++++++
chr7:122021018-122021365	226	CGCCCCCACGCACCTCCTCCCGGCCACCTCCAACTCACGAGGTCttttttttttttttttttttttttttttGTG	270	1	y	3.7e-09	+++++++++++++++
chr7:122021018-122021365	226	CGCCCCCACGCACCTCCTCCCGGCCACCTCCAACTCACGAGGTCttttttttttttttttttttttttttttGTG	285	1	y	2.9e-05	+++++++++++++ +
chr17:23193187-23193412	151	GttttttttttttttttttttttttttGTAAGCCCACCCCTCCCAAGCtcttctctttctttctttctttctttc	152	1	y	3.7e-09	+++++++++++++++
chr17:23193187-23193412	151	GttttttttttttttttttttttttttGTAAGCCCACCCCTCCCAAGCtcttctctttctttctttctttctttc	167	1	y	3.1e-05	+++++++++++++
chr14:61648744-61649102	76	GTTAGAGCCAACCCCGCCGCCCCGGGGCATGCCGGGAACGCGGGCCGGCTCCACAGCTGTCCCTGCCTCCCCCCA	131	2	n	2e-06	+++ + ++++++++
chr14:61648744-61649102	151	CCCACCCCCGCGCGACCCTGCTGCGCATGCGGAAACTTCTACCTCCCTCTCCCCCGGCACATGCGCAGGATCGTC	188	2	n	1.9e-05	++ ++++ ++++
chr14:61648744-61649102	226	GTGGCGCAAGGCTCTCTACTTCCTCGGTTCCAGTCCCCGCTGTGTCTTGCGCTCCTGTGTGTGCCTGCGTGGCCC	282	3	y	1.9e-07	+++++++ ++ +++
chr2:165982598-165983383	76	CTCCTCCCTTTCTGGAGCCTGGTTGTTAACTTCACACAAACAGGCTtggttctccgttccattttttgttttttt gtttttggcttctggggatttcccgtactttctcgtgaactcagttattcatttgaaagatcagttgtcctttac	140	1	y	1.8e-08	+++ +++++++++++
chr2:165982598-165983383	751	GTGTTTTGGGTTTTTTTTTTTTTTTTCCAGCTGAA	761	1	y	3.7e-09	+++++++++++++++
chr11:103132800-103133380	1	GGTGCTCTCACTGCGCAGCGAGTCCCTCCGCTGCCTCCTCCCAGCCCAAAATggcggcggcggcggcggcccccg	24	2	n	4.3e-05	++ ++ ++++++++
chr11:103132800-103133380	301	GGACGTTCACGCAAAGGCAAATAGGtttttttttttttttttttttttttttttttttttttttttttttttGGC	326	1	y	3.7e-09	+++++++++++++++
chr11:103132800-103133380	301	GGACGTTCACGCAAAGGCAAATAGGtttttttttttttttttttttttttttttttttttttttttttttttGGC	341	1	y	3.7e-09	+++++++++++++++
chr11:103132800-103133380	301	GGACGTTCACGCAAAGGCAAATAGGtttttttttttttttttttttttttttttttttttttttttttttttGGC	356	1	y	3.7e-09	+++++++++++++++
chr11:103132800-103133380	451	AACCCCCAGCAGCCATTGCGCTGCCAGGCTGTCCTCTTCGCCCCTCCACCTCCCCCCCCCCCCATCTTAGGGCTT	499	2	n	4.6e-05	+++ ++ + ++ ++
chr11:88047276-88047915	226	TTCCAGCAGCCAGTCAACCCGCCAGGACGCGAGGGACTTTTTCCCCTCCGTGCGGAGGGTGACGTCGCGCGTGCG CGAGCGTGCTTCTCAGCACCCGTTAGAGGCGTGCGCCTGCGCACTGGGAGGGACGAGCCGCTTCCTCCGGCTTCT CTTCCTCCCCCTCCCCCCCGGTATCAGTGCGCCGAGCTGATAAAGGCGCCATTTTGGAGCGGCCGCGGGAGACGT	294	3	y	2.7e-05	+ +++ + + + +++
chr11:88047276-88047915	226	TTCCAGCAGCCAGTCAACCCGCCAGGACGCGAGGGACTTTTTCCCCTCCGTGCGGAGGGTGACGTCGCGCGTGCG CGAGCGTGCTTCTCAGCACCCGTTAGAGGCGTGCGCCTGCGCACTGGGAGGGACGAGCCGCTTCCTCCGGCTTCT CTTCCTCCCCCTCCCCCCCGGTATCAGTGCGCCGAGCTGATAAAGGCGCCATTTTGGAGCGGCCGCGGGAGACGT	375	2	n	6.7e-06	++ ++++ +++++
chr11:88047276-88047915	451	GGTGCCGCTGAGGGCTCGCTCTGCCGTACGCTAGGCTTGGTAGGAAGGCCTCTTTTTTTTTTTTTCCTTCCCCCC	501	1	y	5.2e-07	+ +++++++++++++
chr17:57247682-57249601	301	CATGCATAAACTACATTTCCCAGTATTCCCAAGGACGCACTTCCTCTCCCACCCCTCACTTCCCCGATACCCTGC	339	2	n	8.3e-05	++ +++++ ++ ++
chr17:57247682-57249601	676	TGGCGCGAAGCTTCCCACCGTAGTGTGATACCTTTTTCGTCACTGGGACTCTGAGTCCTTCTCCACCCTCCTCCA	732	2	n	3.3e-05	+++ + + +++++
chr17:57247682-57249601	1126	AGTCAAGTGCAAGTGCGCGGTGCtgtgcgtgcatgcgtgtgtgtgtgtgtgtgtgtgagtgtgtgCCTAGCCCAG	1162	3	y	7.7e-10	+++++++++++++++
chr17:57247682-57249601	1126	AGTCAAGTGCAAGTGCGCGGTGCtgtgcgtgcatgcgtgtgtgtgtgtgtgtgtgtgagtgtgtgCCTAGCCCAG	1180	3	y	8.1e-05	+++ +++++++ +
chr17:57247682-57249601	1801	GTCTCCGGTGGAGGGCGGCGGAGACCCGGGCAGGAGGCGGTGGCGTCCTGGGCGGCAAGAGCAGCATGGATTGGG	1820	2	y	2.7e-05	++++ + ++++++
chr3:65929468-65929829	1	CCCGGGGTGGGGTAAGAACTCCTGCCCCACCCTCCAGTTTCCTGGGCCTGATGTGAGAAGCAAACCCAACAGAGT	21	2	n	5.1e-07	++++++ + +++++
chr3:65929468-65929829	151	GCCACCTCCCCCACACACACCCAACTACCCACAAGCATCTGGTGACCGCGTGCTGTCCCCTAGTGGCCAAACTGC	158	3	n	6.3e-05	+ + +++++++++ +
chr3:65929468-65929829	226	ACCCAATTCATTTCAGTGAAAGTCATACGAAAAAGTAAATTCGTTGTGAAAAAGAATAACAAATAAAAAACGACA	274	1	n	1.8e-05	+++++ ++ ++ +++
chr3:51518481-51518845	1	aagggaaagcaagggaagggggaggggagggagagggagaagaagagggaggaagagggagtaaaaggaagaggg agggaaaggaagagggagggagagggaTAGAGAAGGCGGAGGCAGGGGCAGTGACTGGAATGGGTCACAGTCAGG	5	2	y	4.6e-05	+ + +++ ++ +++
chr3:51518481-51518845	1	aagggaaagcaagggaagggggaggggagggagagggagaagaagagggaggaagagggagtaaaaggaagaggg agggaaaggaagagggagggagagggaTAGAGAAGGCGGAGGCAGGGGCAGTGACTGGAATGGGTCACAGTCAGG	26	2	y	3.8e-07	+++++ +++++ ++
chr3:51518481-51518845	1	aagggaaagcaagggaagggggaggggagggagagggagaagaagagggaggaagagggagtaaaaggaagaggg agggaaaggaagagggagggagagggaTAGAGAAGGCGGAGGCAGGGGCAGTGACTGGAATGGGTCACAGTCAGG	48	2	y	4.3e-06	+++++ +++++ ++
chr3:51518481-51518845	1	aagggaaagcaagggaagggggaggggagggagagggagaagaagagggaggaagagggagtaaaaggaagaggg agggaaaggaagagggagggagagggaTAGAGAAGGCGGAGGCAGGGGCAGTGACTGGAATGGGTCACAGTCAGG	64	2	y	4.6e-06	+++ +++++ +++
chr3:51518481-51518845	1	aagggaaagcaagggaagggggaggggagggagagggagaagaagagggaggaagagggagtaaaaggaagaggg agggaaaggaagagggagggagagggaTAGAGAAGGCGGAGGCAGGGGCAGTGACTGGAATGGGTCACAGTCAGG	80	2	y	4.6e-06	+++ +++++ +++
chr3:51518481-51518845	1	aagggaaagcaagggaagggggaggggagggagagggagaagaagagggaggaagagggagtaaaaggaagaggg agggaaaggaagagggagggagagggaTAGAGAAGGCGGAGGCAGGGGCAGTGACTGGAATGGGTCACAGTCAGG	107	2	y	1e-07	+ ++++ ++++++++
chr3:51518481-51518845	226	CCATTCTGCACACACACACCCAGGCTTCTCACACAGCAGAAGAAAAGGAGCTGAAAGGCACCAGGAACCCAGGGC	232	3	n	4.5e-06	+++++++++++ +
chr3:51518481-51518845	301	GAGGGGAGACAGGGAGGCTCGGCTCTGAGGGTCTGCTTCCTGTGTCTAAGGGTCACCGACACAT	303	2	y	7.3e-05	++ + + +++ +++
chr18:53744552-53744970	1	CGCTTCCGCCTAGCAACCAGGCCCGCAGGCCGAGAGCCCGGGGGAGGCTGGAGGACAAAGGGTGATAGAGACCAG	33	2	y	7.3e-05	+++ + + ++ +++
chr18:53744552-53744970	301	AGTAGGAGGGCAGTGTGTTTTGAGCCTTATGCTCCGCTTTAATCTAAGAAATGAAACAATAGCGTTTTGTTTTTT TTTTTTTAATCCTAGCTCTCAGGCACCTGGCGTCAACATAACT	366	1	y	1.3e-08	+++ +++++++++++
chr15:59728239-59728544	151	CTCCCAGAGGCTCCTGGTTGTGTAAGGGCCTTTTTTTTTTTTTTTTTGAGGAGGTTGCAGGCAACAGGATGAATC	181	1	y	3.7e-09	+++++++++++++++
chr16:84834805-84835304	1	CACCTTGCACTGAGTCCCGAGCTGCCAGAGTCACCGCCGCCGCCACCGTTCTACTTCCGGCCCTGGCTCCGCCTA CACACGCCTACCCGCCATCGCAAGGCACTATGGGCCGCGGCTTCAGTCGTTCGACGCTCACCGGACAGGAAGCGC	62	2	n	1.2e-05	++++ +++ ++++ +
chr16:84834805-84835304	301	CTGCACTGTACGCATGCGTATTCTGGCCTGTCCCCTAGTTCAAGCTCCCTTCGGAGTCAGCGTCCCGATCCTTGG	306	3	y	8.5e-05	+++ + ++ ++
chr16:84834805-84835304	376	GGTTGGGGAGGTGGATGTAGGGTGGGGGTACAAAGGAGCGCGTAAAAACCAAAACCAAAACAAAACAAAAAACCA AAGCGGCTGGGGGGCGTTTGTGCCTCGTGAGCCCCGTCGTCGCGGGCGT	382	2	y	4.3e-05	+++++ ++ + +++
chr16:84834805-84835304	376	GGTTGGGGAGGTGGATGTAGGGTGGGGGTACAAAGGAGCGCGTAAAAACCAAAACCAAAACAAAACAAAAAACCA AAGCGGCTGGGGGGCGTTTGTGCCTCGTGAGCCCCGTCGTCGCGGGCGT	438	1	n	2.3e-07	++++++++++ +++
chr11:88067964-88068836	1	CATCTTCTCTCCTGCGCTCCCCCTGCTCCAGCTGCCTGAGCCACGGACCGCAGCATCACACACCCCCGCGGGGGG	22	2	n	4.3e-05	+++++ + ++ ++
chr11:88067964-88068836	76	GGACGCCGCAccccatccccgcccccggccccaccccagcccccgcGCGGGCTCCCTGACCCCACCGCCCGCGGG	105	2	n	4.6e-05	++ ++ + +++ ++
chr11:88067964-88068836	601	CCGGCGGAGCCCGGCCGCCGAGGTGAAAGGAGGCGGCCTCGCGGGGTGCGGGGGAGAAGCAGGCCTCGGGGTGAA	649	2	y	2.9e-05	+ ++ +++ +++++
chr11:88067964-88068836	676	CCCGGGCCCCCCCAAGCACACACGCACACACACACCCTTCCCTCCCGCCCCGAAGGGGAAGGGAGGAGGCCGGCC	692	3	n	2.3e-09	+++++++ +++++++
chr11:88067964-88068836	676	CCCGGGCCCCCCCAAGCACACACGCACACACACACCCTTCCCTCCCGCCCCGAAGGGGAAGGGAGGAGGCCGGCC	727	2	y	3.5e-05	+ +++ +++ +++
chr10:45584424-45584638	1	CTGCCTGTGTGTGTGTGTGTGTGGGTGTATCTGCACAGAGGCCACTGTCTTCCATCCTGTTTCTGTGAGATAAGA	7	3	y	7.7e-10	+++++++++++++++
chr17:56897772-56898002	76	GGCAGGAGGCTTCCACTGTGTGAGTGAGCCCTTCAGTGAATACTGGGAGGCAGgtgtgtgtgtgtgcgtgtgcgt ttgtgtgCGCATGACATGTGGTGTGTGAAGTGCAGTGTGTGCACTGTGTGTGGTGTGTGCTGTAGCATGTGTGTT	131	3	y	3.9e-09	+++++++++++ +++
chr17:56897772-56898002	76	GGCAGGAGGCTTCCACTGTGTGAGTGAGCCCTTCAGTGAATACTGGGAGGCAGgtgtgtgtgtgtgcgtgtgcgt ttgtgtgCGCATGACATGTGGTGTGTGAAGTGCAGTGTGTGCACTGTGTGTGGTGTGTGCTGTAGCATGTGTGTT	147	3	y	3.2e-05	+ ++ ++++++ +
chr9:64736704-64738021	151	GTTATCCCGGTCTGGTTGTAGCTAGGCAGGGACAGAGATGAAAAGGGGGGGAAAAAAAAAAAAAAAGAAAAACGC	202	1	n	3.7e-09	+++++++++++++++
chr9:64736704-64738021	301	GCCCTCCCCTTCTCTCCCTCCCACCAGCCAGGTCGCTCCGGAGTGCTAAACATTAGTTGCCCGTCTGTGGGGAGG	307	2	n	9.2e-06	++ ++++ +++++
chr9:64736704-64738021	451	CCGAAGCCCAGGAAAAGGCTCACgaggagggaagggaagaaaagggaaacgaacagaaaagagaaaaagCAACAC	476	2	y	4.3e-05	+++++ + ++ ++
chr15:73512243-73512751	1	GACGTGGCTGGTCACCTGGGGATGCCGCCCATTCCTTCCGTATTCCGGGGGACAGGAGGAGGGGCCAAACCCGCA	48	2	y	2.7e-05	++ + +++ + +++
chr15:73512243-73512751	226	CACGCTATCCAGGCCCCGCCTCCTAGGTCCCGTCCACACCGGACCCCCCCCCCCCCCACACACACACACAGGCCA	234	2	n	6.9e-05	++ + + + ++++++
chr15:73512243-73512751	226	CACGCTATCCAGGCCCCGCCTCCTAGGTCCCGTCCACACCGGACCCCCCCCCCCCCCACACACACACACAGGCCA	282	3	n	5.1e-08	++++++++++++++
chr15:73512243-73512751	376	GGAGGCTTGGGCAGGGGTGCTCCGCTGGGGTCTGGGTTGTGGGCGCCGGCGCCCTCTGAGTCGCGTCACCCCGGC	376	2	y	4.3e-06	++++++ ++++++
chr4:44756255-44756898	151	CAGCCGAGATTTCTTTTCGAAAGGAAGGATGAAGAAAAAAAGAACAAAACCAAACACAAAGTTTATAGGCGGAGA	185	1	n	2.8e-06	+++++++ ++ ++++
chr4:44756255-44756898	376	CCCTCCCCGTTCCTCTACGCGTTTCGGTTCCTGGTTGGTGCTTCCTGGTCGCGGCCGCGGCAGTGAGTATGTGTG TGACGGACCCCGAGCTGTCCCGCGGCCGGGGGACCCCTTCCCCTCTCCGCCTCGCCCGCGGAGCTGTGGAACTAA	438	3	y	3.7e-07	+++ ++ ++++++++
chr13:13889589-13889864	226	TAGacacacacacacacacacacacacacacacacacacacacacacaca	230	3	n	7.7e-10	+++++++++++++++
chr13:13889589-13889864	226	TAGacacacacacacacacacacacacacacacacacacacacacacaca	246	3	n	7.7e-10	+++++++++++++++
chr17:33968680-33969247	1	GCCACGAGGGGGCAGCAGGACACAGGAATAAGAGTGGCTCCAGTTCTTGATCACCTAAGTGGCTGTGAGCTTTGA ATGCTGGGGAAGGCAGGGAGTTGTGGTCGCCTATGCCCTCTTCATACCCAAGCAGCCAGGGATTTTCCTTTCAGC	74	2	y	6.5e-05	+ + ++ + ++ +++
chr17:33968680-33969247	226	CACCTGATTGTTACTCAACACCACACTCCAGTCACAGTGAAATAGACACACAAAGACAAACACACACACAACACA	265	1	n	7.6e-06	+++ + +++ + +++
chr17:33968680-33969247	226	CACCTGATTGTTACTCAACACCACACTCCAGTCACAGTGAAATAGACACACAAAGACAAACACACACACAACACA	282	3	n	3.5e-07	++ +++++++++++
chr4:136021639-136022060	76	ACGGAAGCGCGAATGGTCCCTTCCGGGCCTCCGCTGGGGGTGTGTGTATGTGTGGAAGGCCTCAGGACCCGCCCC	115	3	y	1.7e-09	++++++++ ++++++
chr8:111300130-111300575	301	CGTGCGGAGTCCGCCATCTCGCGCCCCTTCCTTTGAACTGTTCGGCGGGAAGAAGCCCTGAGGAAGAGAGTTGGT TTTTTTTTTTTTTTTTTTCCCCTTCCTCTTCTACTGAGAGTGAAAAATGTTAAAAGTGgccgggcggtga	375	1	y	3.7e-09	+++++++++++++++
chr4:101265032-101265541	451	tttaatcccaacactccgggaggcagagacaggtggatctctgtgaAATGACCTGTCCC	469	2	y	1.9e-09	++++++++++ ++++
chr5:142905750-142906919	301	CTCGCCCAACCCCGGGCAGCCGCGCTCCCAGCCTCAATACGCACGCGCAGCTAACTAGGAAGAGGGGGAGAGGAA GAGCTCCCTCCCTAGCGCACACGCGCCTCGATGCCCAGTGATAGAGAGCGCACGCGCAGTGGCATCCCAGCCCCC	363	2	y	1.9e-05	+ ++ +++++ ++
chr5:142905750-142906919	1126	CCCTCCTTTTGaaaaaaaaaaaaaaaaagaagaagaaaaaaaaa	1137	1	n	3.7e-09	+++++++++++++++
chr5:142905750-142906919	1126	CCCTCCTTTTGaaaaaaaaaaaaaaaaagaagaagaaaaaaaaa	1155	1	n	1.5e-05	++ ++ +++++++++
chr1:120121016-120121345	151	GGAGTTTATTGCGCACGCGCGGGGAGGAGCCGCGGGGCACGTTGGGAGCAGGTGGGACGCGTTTCGTTTTTTTTT TTTTTTCCGTGGGGGAAGGGACGGACGGGACATTCTCCGTCAGGGCAGTTGGGCAGGAGCTAGCAGGCACTGAGA	217	1	y	3.7e-09	+++++++++++++++
chr2:136890951-136892294	226	ACTCTATGCTCACGCGCACCACCCCTCCTTCCCCCGCCCCTCTTCCGGGGTTTGCGTGAAGCTCCCGCAAAGGAA	230	3	n	8.9e-05	+ + +++ + +++
chr2:136890951-136892294	226	ACTCTATGCTCACGCGCACCACCCCTCCTTCCCCCGCCCCTCTTCCGGGGTTTGCGTGAAGCTCCCGCAAAGGAA	252	2	n	4.3e-05	+++ ++ + +++ +
chr2:136890951-136892294	676	AGAAGTCGGGAGTCTTCAATTCAGTGCCGGATCCGGTTGGTTAATTTCCTTGGCTTTGCCTTTCTTTTTTTTTTC TTCAGAGATAAGTCTTTTATTCTTTTGAACCACCCGAAGCATTATGAAATTATGTTTAAACATATTTTATTTCGC	738	1	y	3.1e-05	+ ++++++++++ ++
chr2:136890951-136892294	976	ACAGTGATACATTATCTGCCAATTGTATTTGTGGCTTTTCCAACCTCTTAAAAAAAAAAAAAAAATCCGCTTTGG	1025	1	n	3.7e-09	+++++++++++++++
chr17:45433529-45433992	301	TAAATGTGAGGGGTGTGGCGTTCCTCAGCACGCTTGGTCCCCAGGGAGCGCtgtttgtttgtttgtttgcttgtt tgtttgtctgtttgtttAACGGAGCGCTGCGCTGGGCATCCCGGCGACCGACGAGGACTTCGCTGAGTCCTCGGG	354	1	y	4e-08	+++ +++++++++++
chr17:45433529-45433992	301	TAAATGTGAGGGGTGTGGCGTTCCTCAGCACGCTTGGTCCCCAGGGAGCGCtgtttgtttgtttgtttgcttgtt tgtttgtctgtttgtttAACGGAGCGCTGCGCTGGGCATCCCGGCGACCGACGAGGACTTCGCTGAGTCCTCGGG	374	1	y	8.7e-07	+++ +++++ +++++
chr15:76639619-76640236	526	AAGTGCCCTTTCTGGTGAGTTACCAGGACTACAGACTGACCCTGCTCCCCTGAAATCTACCTGCCtttttttttt ttttttttttAGGATTa	591	1	y	3.7e-09	+++++++++++++++
chr8:11557947-11558545	76	TATAGGAGAATCATTAGCATATTGCGGAACGTTCCGCCTCTGCGGCCCTTTGATTGGTCGCAACATCCCCCGTGG	108	2	n	7.8e-05	+ ++++++++ ++
chr8:11557947-11558545	151	AATGTCCTTATCATTGTGCTACAGAGTCATTGGGGGGCGGGCAGTATGGGGGCGGGCTTTGCTCGGGACTCGCTC CAGTCTGTGTTTCCGCTGTCTGCTTTTTTTTTTTTTTTTTTCCTCTGGTAGAGGGCCGGGCGGAGAGAGGAGGTG	225	2	n	7.3e-05	++ + ++ ++ +++
chr8:11557947-11558545	151	AATGTCCTTATCATTGTGCTACAGAGTCATTGGGGGGCGGGCAGTATGGGGGCGGGCTTTGCTCGGGACTCGCTC CAGTCTGTGTTTCCGCTGTCTGCTTTTTTTTTTTTTTTTTTCCTCTGGTAGAGGGCCGGGCGGAGAGAGGAGGTG	249	1	y	3.7e-09	+++++++++++++++
chr3:36000401-36000870	376	CATCTGGAGGGGCGGGGCCAGGtttttttttttttctttttttttttttttAGCACAGAGCATGAGAGGAAAATG	383	2	y	8.9e-05	+ +++ + + ++++
chr3:36000401-36000870	376	CATCTGGAGGGGCGGGGCCAGGtttttttttttttctttttttttttttttAGCACAGAGCATGAGAGGAAAATG	412	1	y	3.7e-09	+++++++++++++++
chr15:78581634-78582244	76	GAGGGGGGGAGGGAGGAGCCTCAGAAGGCAGGAGGGGAAGGACCCTGAAAGAAGATTGGTCTACTGCCAAAAAAA	77	2	y	2.1e-05	+ ++ ++++ +++
chr15:78581634-78582244	226	AAAACATCTCTTTCCCAAAGAGCTCCCTGGGAGACAAACAGACAGACATCTCACTGGGAAAGGGAGATGAGGGTA	260	3	n	1.1e-05	++ +++ +++ +++
chr15:78581634-78582244	376	TGCATAGCCCCTGGTCCCAGAAACACACTCTTGACGCTACTTTGTATTTTTTTTTCCCACACATAAAATGAAAAA	416	1	y	6.7e-07	+++ + +++++++++
chr15:78581634-78582244	451	CCGCAGGATGTGAATTCCGCTCCCGCCCTCTGGTGGCCACATGAGGAACAGGCCAGGGTGGGTGGGGCAGAAGTC	507	2	y	5e-05	++ ++ + +++++
chr5:110107606-110108468	76	GCTCCTCCCTCGGCTTCTCCTTCCTTTCTCGTGACTCCGCCCCTTCCAGAACTAGGCGTCACCGCCGCCCCAATT	79	2	n	2.4e-06	+++ ++++ ++ ++
chr5:110107606-110108468	301	CGCAAACGCGCTGTGTATCCAAGGGCAGGAGGGGTGGGGCGCGGAGCAGCTCATCCTCCTCTTCCTCTTCGTCCT	360	2	n	4.3e-05	++ +++++ + +++
chr5:110107606-110108468	601	GGGGAGGGAGAGCAGGGAGGGACGGGAAGAACAACAGGGCGCATGTGCGTGCCGCGAAGGGTGGCTCTGGGAGGA	603	2	y	5.3e-05	+++++ ++++ ++
chr5:110107606-110108468	601	GGGGAGGGAGAGCAGGGAGGGACGGGAAGAACAACAGGGCGCATGTGCGTGCCGCGAAGGGTGGCTCTGGGAGGA	637	3	y	2.7e-05	+ + + ++++ +++
chr5:110107606-110108468	676	TCGAGAGCAGATCGCTTACCCGCAGCGAAAAACTTGGATAGGGGCGGGGTCAGGGAGAAAGGACAGCAAGGCGCA	715	2	y	8.9e-05	+ +++ + + ++++
chr5:110107606-110108468	751	TGCGGCGAGGGGCGGGGCCGAAAGGACAATGCCTCTAAAACAAAACAAATAAAAATAAGCCTAGTGGTGGAAGAT	789	1	n	7.9e-07	++ ++++++++ +++
chr17:55952635-55952835	1	TGGGGCCCTCCTTCTACCTCAAGGCCTTTCCCCACACATACACACAGCAGCTGGTGACAGAATCAGGGTTCCCGT	7	2	n	1.1e-05	+++ + +++ ++++
chr17:55952635-55952835	1	TGGGGCCCTCCTTCTACCTCAAGGCCTTTCCCCACACATACACACAGCAGCTGGTGACAGAATCAGGGTTCCCGT	33	3	n	1.7e-07	++++++ +++++++
chr17:55952635-55952835	1	TGGGGCCCTCCTTCTACCTCAAGGCCTTTCCCCACACATACACACAGCAGCTGGTGACAGAATCAGGGTTCCCGT	53	2	y	5e-05	++ + ++++ ++++
chr11:69921221-69921900	301	ttttttttttttttttttaaatCCCTTCAACCTCTTCTTCCCTCCCCTTGAGCGACAGCTCGCTCTACCGGGCAA	301	1	y	3.7e-09	+++++++++++++++
chr11:69921221-69921900	301	ttttttttttttttttttaaatCCCTTCAACCTCTTCTTCCCTCCCCTTGAGCGACAGCTCGCTCTACCGGGCAA	327	2	n	6.9e-05	+ +++++ + +++
chr3:90692232-90692594	1	gagacagagagagacagagagagacagagagagaaggacagagggagagaCACACACACAGAGAACACTGTGAAA	10	2	y	3.1e-06	+++ +++++ ++
chr3:90692232-90692594	1	gagacagagagagacagagagagacagagagagaaggacagagggagagaCACACACACAGAGAACACTGTGAAA	34	2	y	3.5e-05	+ ++++++ ++
chr3:90692232-90692594	1	gagacagagagagacagagagagacagagagagaaggacagagggagagaCACACACACAGAGAACACTGTGAAA	51	3	n	4.6e-05	++++++++++ + +
chr3:90692232-90692594	226	ACGGTGAAGGAGGTAAGCCTTAGAGGCTCAGTACTACACAGGCTGCTGGCTCTTTTTCTTTTTTGTTATGACTGA	279	1	y	5.4e-06	++++ +++++++++
chr11:94989831-94991122	226	GAATGAAGGAGCTCTAAAGAAGCTGAGTTTTCAAGGTGGGATTTGTAGGGTACACACACACACAAACACGCTTGC	280	3	n	9.7e-09	++++++++++ ++++
chr11:94989831-94991122	526	GCATCTTTGGTAATCTCCTGCCATATGGGTGATGTAACCCCCAACCCTGTCCCTTTCTTCATTTCTCCTCCGGAC	571	2	n	2.7e-05	++++ + ++ ++ +
chr11:94989831-94991122	601	AGAGCACCACAAAGATTGCTGGGCCCAAGTTTTACATTCTGAAAGATGAAAAAAAAaaaattcctatggggaatt	646	1	n	7.2e-05	+ ++++++++++++
chr11:94989831-94991122	901	AGGGTTAAATGAGGGGACGCCTAAGTGGATTGTGAAAAGCCGAGTTTGGGATGGGAGGGCTGAAGAAGAATAGCC	955	2	y	8.3e-05	+ +++ ++ + ++
chr11:94989831-94991122	976	AAGGTCGGTGAAGCTGCGGAAGGCTGTCCGCCAACTATGAGTAGGAGAGACCAGGCGACAGGGTGGAAGGGAAGG GGAGGGCTCACAGGCTCCGGCCCCGGAAATCCGATCCCTTTAGGACCCAGTGGTACCAGTCCCCCAGCGGCGGCG	1041	2	y	3.8e-05	+ +++ + ++ +++
chr11:94989831-94991122	1201	gggggggagggagggagggagggaggCGCGGCGGAGCGGCCCGGGTCAGCGGAGCAGCCACGGGCGCGGGGATGC	1204	2	y	2.5e-05	++ + ++++ +++
chr7:25205498-25206131	1	TCCTCCTCCCCCCGCCCCAAAGCCTTCCTCTTTCTACCTTGAGGGGAACCGCATCCTGTCCCCTGGAGGCCCAGA	23	2	n	2.9e-05	+++ +++++ ++ +
chr7:25205498-25206131	151	ATAAGCCCTCTGGGCCCCCATCCTTGCCTCCCAAAAGCCTCTGACCACACTTCCCAACTGAGGGTGGGGACCATG	167	2	n	5e-05	++ + +++++++
chr7:25205498-25206131	226	GGAGTGGGGGAGTCAGAAGCTGCCCAAGGCCACACAGGGCTGggcagaggcagagccagaggcagctggtggggt	271	2	y	9.2e-07	+++++++++ +++
chr7:25205498-25206131	376	gagcctgtttccccatctgaaaaacacaaacaaacaagaggtccctgctgcacggtagtcacgaggattaaatgg	395	1	n	3.7e-07	+++++ +++++ +++
chr7:25205498-25206131	526	CCCACCTCTCTCCCCACGTGACCCTACCTAGGCCCTCCGCCTCTCCACTGGGTCCAGTCAATCTCCTCCTTTACC	526	2	n	5e-05	++ +++++ + ++
chr7:25205498-25206131	601	AACTCGACCACCCCTGCCCCTCCTTTCCACACT	613	2	n	5.4e-06	++++++ ++ + + +
chr11:106787654-106789455	376	GCCGCCCCGGGTCCCGGCCCACCCTCCCGGACCaaaaaaaaaaaaaaaaaaaaaaaaaaaaaGGTTGAACGCCAT	409	1	n	3.7e-09	+++++++++++++++
chr11:106787654-106789455	376	GCCGCCCCGGGTCCCGGCCCACCCTCCCGGACCaaaaaaaaaaaaaaaaaaaaaaaaaaaaaGGTTGAACGCCAT	424	1	n	2.9e-05	++++++++++++++
chr11:106787654-106789455	451	TACCCGAAGCGTAGCCTTTAACGGCTTTTAACCGGACGTGTGACAAAAGCCAGGCCTCCTTTCAGGAAGGGAAAA AAAAAAATCTAAAGGTCGGTTGGGAAGGCGAGCCTTCGGCCGCGCCGCTCTCCCATCCCCCACCCGGCCTGACAG	523	1	n	5.1e-06	++++++++++ ++
chr11:106787654-106789455	1201	TGAAGATGTTTACGTCTCCACAGACTCCCCCCACGCCCATAACCGAAGGAGACCAGGGAGGCGGAGCTTGGCCTC	1257	2	y	6.1e-05	++++++ +++ ++
chr11:106787654-106789455	1501	AGCGCGTGCTGCGAGGAAGTGCTCCTCTGCTGTCCAATCAGCGTCGAGAAGCCGTTTTAACGTCCCTCCCTCTTC CACCCCTCCTTCCCCGCTCGCTAGTGTCTGCCCCCTCCTCCTCCCGTCGGCTCGACCGAGTTCGACCCTTCTGGG	1565	2	n	6.2e-06	+++ +++++ ++ ++
chr11:106787654-106789455	1501	AGCGCGTGCTGCGAGGAAGTGCTCCTCTGCTGTCCAATCAGCGTCGAGAAGCCGTTTTAACGTCCCTCCCTCTTC CACCCCTCCTTCCCCGCTCGCTAGTGTCTGCCCCCTCCTCCTCCCGTCGGCTCGACCGAGTTCGACCCTTCTGGG	1602	2	n	1.1e-05	+++++ + +++++
chr7:25754783-25756326	301	ACAACCGCCCAGTCTCTCCGCGCCGTGCTTCCCTCAGACTCTCTGTAAAACACATTCTAACTGGTCTTCATCTCA	328	2	n	3.3e-05	+ + ++++ + +++
chr7:25754783-25756326	676	AATCAAGTGGATCTGTTACTCATCGTTTGTTAGAAACCCAGTTGCCTTTATGAGAAACAACAACAACAAAATTGG	730	1	n	6.2e-06	++++++ ++ ++ ++
chr7:25754783-25756326	751	TCCTGGAGAGCGCTGAAGGGTTGAAAGCAGGGGCTAGGCTAACAACGGGAGAAAAGTTGTGTGGTAAATCGCACC	773	2	y	7.3e-05	+ + ++++ +++ +
chr7:25754783-25756326	1051	ACACCTGTCGCCCTTTGCTCAGAAGACAAAAACTTAGTGAAATAACACCGAGACGCACAACGCAAATGTGCACCG	1096	3	n	9.3e-05	+++ + ++ ++++
chr7:25754783-25756326	1426	GACTTCCTCTCTCCTCCCAGCTGACCACAATGATTTGTTTTTTGAAAGAAAAAAAAAAAAAAAAAACTTTGTGGC	1474	1	n	3.7e-09	+++++++++++++++
chr8:11635174-11636613	376	AAGCGGAGCGACAGCAGCTCCTCGCTGGAGAAGCCTGCCTCCACGGCCGCGCCCGCTCCCGCTGACATGATGGGT	409	2	n	6.9e-05	++++++++ + ++
chr8:11635174-11636613	826	CTGGGAGGCGATCACCGCTTGAGGAGGCCGCTACTGATGCCAACGCTGAAGGTGTAGGGGTTGAGGGTGGGCCTG	881	2	y	8.3e-05	+ ++ ++++ ++
chr8:11635174-11636613	901	CACGTTAGTGTGGTTAGAGGGACGAGACTTgccgggcagtggtggcgcacgcctttaatcccagcacttgggcgt caaaggcaggtggatttctgagttcaaggccagcctggtctacagagtcagttccaggacagccagggctataca	971	2	y	1.4e-05	++ + ++ +++++++
chr8:11635174-11636613	1051	gagaaaccctgtcacgaaaaacaaacaaacaaacaaacaaaacaaaacaaaaAAAGGAGGGGGGAGACTTGGCTG	1069	1	n	4e-08	+++++++++++ +++
chr8:11635174-11636613	1051	gagaaaccctgtcacgaaaaacaaacaaacaaacaaacaaaacaaaacaaaaAAAGGAGGGGGGAGACTTGGCTG	1091	1	n	2e-07	++ ++++++++++++
chr5:122264394-122264728	226	CCTCAGAAAATCGGAAGATGTAAACTTCTGTTGTGACACTTTGGGTGCTGCGTGGTTGttttttttttttttttt	284	1	y	3.7e-09	+++++++++++++++
chr17:45572559-45574118	76	AGGGAGGGACCTAGGAATCTTCTCGTGCCTGCTCTGTCTCTCCTCCCCCGCCCTCCACTGGGAGGGCAGAAAGAT	108	2	n	9.2e-06	+++ ++++ + ++
chr17:45572559-45574118	1051	CACCCCCCCACCCCCCAAGAGTCCAGAACTCAGGGGACTGAAAGAGAATGGAGGTGGCCAACTCGGCTGCCATTT	1083	2	y	9.4e-05	++ + + ++ ++
chr17:45572559-45574118	1201	TTTAAGGAGGCCCCCGATTCCCCCATCCCCACCCTCCCGGGTACAGCACAGCTTCAGGCTGGGAGCCGCTTTCCC	1223	2	n	7.3e-05	++ ++ + +++++
chr17:45572559-45574118	1426	CTGCGGCGGGGGCAGTGTCTTCGTCGCCGCTTGGCTGGGTGGCTTTTTTTTTTTTTTTTTTTCCCCTACCTTGAT	1469	1	y	3.7e-09	+++++++++++++++
chr4:127061054-127061355	151	CGGAGGCGGGGGATGGACTAAGCAGGAGAGGTTGACGGGGCGGGTCAGGGGGGTTTAGTTTTAGGCTATCCTTAA	152	2	y	3.3e-05	++++++ + ++ ++
chr4:127061054-127061355	226	TGTCACCTTAGCTGCCCGTTTTTCGTTTTTTGTTTTGTTTTGTTTTTTGTTtttttttgttttaagacagggtct	269	1	y	3.4e-08	+++++ +++++++++
chr10:99106829-99108290	1	TGATTGCATCGATCACCGACTCTCCTCCGCTTCGCCACCACCGATCACATCTCTCTCTCTCTCCAAGTCCCAACC	50	2	n	6.2e-06	++ ++++ ++++
chr10:99106829-99108290	76	CGCTTCCCGACAACAACCCGGTAGTCCGCTACCTCCGAAGCTCGCGGGGCTCGCTGTGTgcgcgcgcggcggacc	129	3	y	4e-05	++++++ + + + +
chr10:99106829-99108290	526	GGAGCGGGACGCCGTGCCCGGGTTGAGCGGTGAGCGCTGCTCCCGGAGAGATCCCGGCGCTCGGGGCTGAGGCGG AGCTGGCTCCGGGACTCGCCGGCTGGGTTCCCGCGGCGCGCCTGCGTCAGAATCACCAGGGAGGTTTAAAGAGCG	587	2	y	7.8e-05	+ +++ +++++ +
chr10:99106829-99108290	751	GGGGGTTCCTCCCGATGGTGGGGACCCCTCCGGATGGAAGCTGGGGCAGTGCCCGAGCCTCTCAGCCGGGTTGTA	786	2	y	7.3e-06	+++ ++ + +++++
chr10:99106829-99108290	1051	AGttgtttttgtttttgtttttCCTTTCTTTCTTCTTTCCTTTTCTGACAGTAACCAAAGCTCACTTGGCAGAAA	1056	1	y	5.1e-08	+++++ +++++++++
chr10:53629392-53630346	451	TGCGCGGGGGCGCGCAGGCTTCTTCGCGCTGCTCTCGCTCGGCCTCTGAAGGACTTGAGCTTCCCGCGGACCCCG	483	2	n	4.1e-05	++ +++ +++++
chr10:53629392-53630346	526	AGCCGCGCACTGCCTCAACTTTCCGGCCGCTGGGGCTTCTTCCGGGTGCGGACGCAGGCGGGCGCGCGCCAGGAC	534	2	n	2.5e-05	+++++++ + + +
chr10:53629392-53630346	601	GGACGCTGGAGTCTGCGAGCGGGAGGCGGGAGCAGGGAGAGAGGCGGGACTCGGGGAGCTGGAGGCGGGGTTTGG	622	2	y	1.4e-06	++++++ + +++++
chr10:53629392-53630346	601	GGACGCTGGAGTCTGCGAGCGGGAGGCGGGAGCAGGGAGAGAGGCGGGACTCGGGGAGCTGGAGGCGGGGTTTGG	655	2	y	3.3e-05	++++ +++++ ++
chr10:53629392-53630346	751	GGTTTAGGGTGAAGTGGATAATTCAGGCTGGCAGGAATTCCGCGGATTGGTGATGGGCGAACGCGGGGTGGAGAC TAGGGCGGAGAGAAGGGGAACCCTGGTGACGTATTAGGGCGGGATGTGGGCGATCTGGGACTCGACTTTGGTTTG	820	2	y	8.9e-05	++++ + +++ +
chr10:53629392-53630346	901	CACCTTCAGATATCTTAGAACACAAGTGAttttgttgttttttttttgtttttg	938	1	y	6e-08	++++++++++ ++++
chrX:42148982-42149368	301	CGCCTGCGCGTTCCATTCGCCTCCAAGTCGCCGAAGAGCGAACACCCCAAACAATCCCGAAGCGCCACCaaaaaa aaaaaaaaaaa	370	1	n	3.7e-09	+++++++++++++++
chr5:146963719-146963947	151	AAAGCCCTCCGACaaaaaaaaaaaaaaaaaaaaaaaaaaaaaaaagaaTCGTGCAGCAGGCCTGAGTGAAACTGA	164	1	n	3.7e-09	+++++++++++++++
chr5:146963719-146963947	151	AAAGCCCTCCGACaaaaaaaaaaaaaaaaaaaaaaaaaaaaaaaagaaTCGTGCAGCAGGCCTGAGTGAAACTGA	179	1	n	3.7e-09	+++++++++++++++
chr10:128211767-128212006	151	GGCGAGCTAGATCAATACGTGAAGAGACGTACTGATTATATCTCAACTAAGTAGGATACCCCTCTCACACACACA CACACCCAGAGAGC	216	3	n	7.7e-10	+++++++++++++++
chr11:77981749-77982801	376	TGCCACCAAAAGCGTCTTTTTTTTTTTTTTTTTTTGTCGCAATGCTTTTTTTTTCCCTCTTTACCAATATGGCGG	392	1	y	3.7e-09	+++++++++++++++
chr11:77981749-77982801	601	TCTCATTACCAAAATGGCGAAAGGAGAAGCtttttttttttttttttttttttGTGCAGGCCTCCAGGTACAACG	631	1	y	3.7e-09	+++++++++++++++
chr11:77981749-77982801	751	TGGTCCGCACACAAACACCAATGGGTGATGCGTCTTCCAGTTCCTGCGGCTGCGCCGTGACCCCTACGCGCTTTC	754	3	n	4.2e-05	+ ++++++ ++++
chr5:114773471-114774889	151	GCCTGTCTCTAGATGCTCTCGCAATtgtgtgtgtgtgtgtgtgtgtgtCTCCCTTTTGGGAAGTGATTGCTTGTT	177	3	y	7.7e-10	+++++++++++++++
chr5:114773471-114774889	226	CCAGGATTGATTAGAACCAGAGAAAGAAGCAAAACCTTGTGATAGAAATTTTATACATATAATCTCCCGGGAGAC	244	2	y	7.8e-05	+++ +++ +++
chr5:114773471-114774889	751	CTTAAGGAGACTGATGCGGAATAAACCTTCACGGCAAACGCTTTGAATTATAGCCGAGTTGGGAATTCAGACAAA	756	2	y	7.8e-05	++++ + ++ ++ +
chr2:168955316-168955759	376	tggtggaaacagaCTCAAGCATCTGCATGTACAATATAAGTAACTTAAAAAAAAAAAAAAAAGAGATT	422	1	n	3.7e-09	+++++++++++++++
chr12:32123098-32123878	226	GGGACAGTATGGCTTAGATAGGTCTAATTTTTATTTTGGTTTTCCCCCTAAACCAGAGAAGAAAAGCTCAAGCAA	253	1	y	2.8e-06	+++++ ++++ ++++
chr12:32123098-32123878	376	CCAGAGCTTGGTGCTGTTAACAGCCTGCAAAGAGGCCTCTGGTGGTACTAATCAGAaaaaaaacaaacaaacaaa aaaaaaacaaacccaaacaaacaaaacaaaagcaagcaagcaaacaaacaagaagacaaagcaaacCACTTACAC	440	1	n	1.5e-08	+++++++++++++++
chr12:32123098-32123878	376	CCAGAGCTTGGTGCTGTTAACAGCCTGCAAAGAGGCCTCTGGTGGTACTAATCAGAaaaaaaacaaacaaacaaa aaaaaaacaaacccaaacaaacaaaacaaaagcaagcaagcaaacaaacaagaagacaaagcaaacCACTTACAC	465	1	n	9.7e-08	++++++++++++ ++
chr12:32123098-32123878	376	CCAGAGCTTGGTGCTGTTAACAGCCTGCAAAGAGGCCTCTGGTGGTACTAATCAGAaaaaaaacaaacaaacaaa aaaaaaacaaacccaaacaaacaaaacaaaagcaagcaagcaaacaaacaagaagacaaagcaaacCACTTACAC	492	1	n	1.2e-05	++++++++++ ++ +
chr10:78185102-78185425	76	CCGCAACCCTAGTGTCCTGGGAAGCCCCGCCCGTCCCTCCCTCACCCCCACTCCCGCCACCACCCTGCCTCTACG	111	2	n	3.8e-05	+++ ++++ ++ +
chr10:78185102-78185425	226	CAGAGCCCAGTCCGGAGCTGAGAAAGCGAGCAAATCGTCACACACTCGCCTGTAACCGTGCAAAACAAAAACAAA AACCCAAGTTCAAACGGAGTTTC	288	1	n	5.1e-08	+++++++++ +++++
chr5:139449185-139449451	1	GCATGTGTGCTAAGACTGCACAGGAACACACTCACACAGACACAACACGTGCCCCTGTGCCTGAGCAGGCTCTAC	27	3	n	1e-05	+++++ ++++++ ++
chr5:139449185-139449451	151	taaagggtacgtggggccaccttctgtgtagttttgcaacttcctaagaatctaccagaatatgaaaaaaaaaaA AAATCTCTTTTAGAGAAAGGCAGGCAAACCTCTGGTGGCAC	215	1	n	1.8e-06	++++++++++++++
chr7:27689251-27689688	226	CCTCCACAGAGTAAGGCGGGAGACCGCAGGCGGGTGTGGGTGTGGCGAATGGGTGTTGATGTGTGGGCGTGTAGG	284	3	y	5.7e-05	++++++ + ++++
chr7:27689251-27689688	301	AACTGTGgtgtgtgtacgtgtgtgtatgtgcgtgtgtgtctgtCAGTGTCTAACTGTATACACACCTTGAGCTCT	310	3	y	3.3e-08	++++++ +++++++
chr7:27689251-27689688	301	AACTGTGgtgtgtgtacgtgtgtgtatgtgcgtgtgtgtctgtCAGTGTCTAACTGTATACACACCTTGAGCTCT	328	3	y	2.6e-06	+++ ++++++++ ++
chr7:27689251-27689688	376	CTGCATAATCTGTGTCTCTTTGCTTGTCGCTGTCTGCTCCTGCTTTCTCTCAGGGACACAGG	408	2	n	1.9e-05	++++ ++++ + +
chr9:64253531-64253976	1	CAGCTTGGAGAAAGTGCGGCCACCGCTGCTCCGGCGCTCCGAGACGCCGCGCACAGACGTCCCAGTGAGGGACTG GAGGGTGAGGGAGGGGCGGGGAAACGAGCAGGCCCCGCCCCCACGGGGGCTGCAGCGCTTCCCTCACGCCCGCCT GACTCCGCCCCCGTCGCTTCGCCGACAGCCAATGGGGACTAGCCTCAGAGGCAGATGACGCGGAAATACGTCACG	75	2	y	2.8e-07	+++++ ++++ +++
chr9:64253531-64253976	1	CAGCTTGGAGAAAGTGCGGCCACCGCTGCTCCGGCGCTCCGAGACGCCGCGCACAGACGTCCCAGTGAGGGACTG GAGGGTGAGGGAGGGGCGGGGAAACGAGCAGGCCCCGCCCCCACGGGGGCTGCAGCGCTTCCCTCACGCCCGCCT GACTCCGCCCCCGTCGCTTCGCCGACAGCCAATGGGGACTAGCCTCAGAGGCAGATGACGCGGAAATACGTCACG	148	2	n	4.6e-06	++++ +++ +++ ++
chr9:64253531-64253976	226	GGAGGCGCGGCGCATTGGCTTGGGGCGGAGTTAAAGGGAGGCTTTCCGGGCGCCCTCTGCTGACCAGCGGTATCC	252	2	y	1.9e-05	++++ + +++ +++
chr9:64253531-64253976	376	ACTCTTCTCCTCCCTTGGGCTGGGTCATTTTGACCCAGACAAAAGTACAAAATAAATAAGAAAAGGACCC	425	1	n	3e-06	+++ +++ ++ ++++
chr6:128438638-128438956	226	GTTTTTTTGTTTGTTTGTGTCGTTTTTGTTAAGATTTGCTTTTCTGGTTGATGGCCCCTAGGAGTGCCCTCCTCC	227	1	y	1.5e-08	+++++++++++++++
chr6:128438638-128438956	226	GTTTTTTTGTTTGTTTGTGTCGTTTTTGTTAAGATTTGCTTTTCTGGTTGATGGCCCCTAGGAGTGCCCTCCTCC	260	1	y	3.7e-05	+++ ++++ ++ ++
chr17:84180936-84181780	76	ACACATACAGACACGCCCAAACCCACATTCACTCACACCACAGGGCACACCCACTAGAGCAacacacacacacac atgcactcacattcacacacctgcacacacCCAGCCCCCACATCACACCAATACCCTACCAGAAACACCCACAGA CACTCCTCCCTCCCACCCCCACCCCCAGACTCTGAAACCCTACATACACAGCACAAACCCAAATCACACTCAGAT	79	3	n	9e-06	++ +++ ++++ + +
chr17:84180936-84181780	76	ACACATACAGACACGCCCAAACCCACATTCACTCACACCACAGGGCACACCCACTAGAGCAacacacacacacac atgcactcacattcacacacctgcacacacCCAGCCCCCACATCACACCAATACCCTACCAGAAACACCCACAGA CACTCCTCCCTCCCACCCCCACCCCCAGACTCTGAAACCCTACATACACAGCACAAACCCAAATCACACTCAGAT	138	3	n	4.9e-09	++++++++++++++
chr17:84180936-84181780	76	ACACATACAGACACGCCCAAACCCACATTCACTCACACCACAGGGCACACCCACTAGAGCAacacacacacacac atgcactcacattcacacacctgcacacacCCAGCCCCCACATCACACCAATACCCTACCAGAAACACCCACAGA CACTCCTCCCTCCCACCCCCACCCCCAGACTCTGAAACCCTACATACACAGCACAAACCCAAATCACACTCAGAT	166	3	n	1.3e-06	+++++ +++++++
chr17:84180936-84181780	76	ACACATACAGACACGCCCAAACCCACATTCACTCACACCACAGGGCACACCCACTAGAGCAacacacacacacac atgcactcacattcacacacctgcacacacCCAGCCCCCACATCACACCAATACCCTACCAGAAACACCCACAGA CACTCCTCCCTCCCACCCCCACCCCCAGACTCTGAAACCCTACATACACAGCACAAACCCAAATCACACTCAGAT	216	3	n	6.6e-05	+++ ++++ ++++ +
chr17:84180936-84181780	301	TTGTCACACACAGATCCACACACCCCTCCACAGGCAGTCTGGACATCACAAGACACACCCACACTCATCCTCGCC	307	3	n	4.9e-06	++++++ + +++++
chr17:84180936-84181780	301	TTGTCACACACAGATCCACACACCCCTCCACAGGCAGTCTGGACATCACAAGACACACCCACACTCATCCTCGCC	354	3	n	9.6e-06	+++++ +++++ ++
chr17:84180936-84181780	526	TAGGGACACCCAGAACTTATAGATACAAATCCACTTGCCACATGGCACCCACACACACCTTCCTTCAGAGATGCC	571	3	n	4e-06	+++ +++++++++
chr17:84180936-84181780	601	CTGCCAAGCACACCCACAAACATTCTTGCACTTTCTGGCTCTTCTGGCTGTCTTCCTGCTGTGCCTCAACTTCCT	609	3	n	4e-06	+++++ ++++ +++
chr17:84180936-84181780	601	CTGCCAAGCACACCCACAAACATTCTTGCACTTTCTGGCTCTTCTGGCTGTCTTCCTGCTGTGCCTCAACTTCCT	660	2	n	3.5e-05	++++++ + +++
chrY:90740149-90741654	151	GCAGGAAAAAAGGGAAAAAAAGGAAAAATAAGTTTTTTAAAAAGTGTCAGACCACACCCCTCCTGCTCTGAGACA	167	1	n	5.5e-05	+++++ +++++ ++
chrY:90740149-90741654	226	CGCCCCTTCTGGGCTAAGACACACCCCCCTGAGAGGGAGAGACAGAGGAGGTCAGAATGGAAAAGCCACCCAAGA	257	2	y	8.5e-07	++++ ++++ +++
chrY:90740149-90741654	301	AAGCGGAGAAAAAAAGAATTAAAAAAAAAGTGTCAGACCACACCCCTCTTCCCTTAGACCCGCCCCTAAAGTGTC	309	1	n	1.7e-05	+++++++ ++ +++
chrY:90740149-90741654	376	AGAACACGCCCCTTCCGGTCTAACGCGAGAGACAGAGAAGGTCAGAATGGAaaggcaaaaaagaaagcggaaaaa aaaagtaaaaaaaaaaaagacaccaaaggtctcttaaaagaccttaaaaaggaaaaatcttaacaaggaaaaatc	449	1	n	3e-06	++++++ +++++++
chrY:90740149-90741654	1051	TGAGGCGTGTGTGTCTGCGTCCTGCCAGAAGGACAGAGAGACGGACTCGGTCCGGAGCTGACTGAGTCCGGGACA	1055	3	y	4.9e-06	+ ++++++++ ++ +
chrY:90740149-90741654	1201	TTTTCCTTTAAGATTTTTCCTTTAAGATTTAAGAAGGagagaccgggacagacaggcagagagactgggacagag	1238	2	y	3.8e-05	+++ + + + +++
chrY:90740149-90741654	1201	TTTTCCTTTAAGATTTTTCCTTTAAGATTTAAGAAGGagagaccgggacagacaggcagagagactgggacagag	1260	2	y	1.4e-05	+++ + + + +++
chrY:90740149-90741654	1276	acagatggacagaCCTGAGCTGCACAGCTGTTGGCCAAGCACCAGGCAGGCCGGGTCTGTCTGAAGGGAGGaggg acagacagggacagacaggcagagactgggacagagacagaTGGACAGACCCCAAACTGCACAGGTGTTGGCCAA	1345	2	y	2e-06	+++++ + ++ ++++
chrY:90740149-90741654	1276	acagatggacagaCCTGAGCTGCACAGCTGTTGGCCAAGCACCAGGCAGGCCGGGTCTGTCTGAAGGGAGGaggg acagacagggacagacaggcagagactgggacagagacagaTGGACAGACCCCAAACTGCACAGGTGTTGGCCAA	1365	2	y	1.3e-05	++++++++ + ++
chrY:90740149-90741654	1426	GCACCAGGCAGGCCGGGTCTGAAGGAAGAAAGCGAGGACCAGGACAGACACACAGACCCAGGCTGCACAGGCCAT	1470	3	n	6.6e-05	++ +++++++ ++ +
chr6:120822443-120822967	376	GGCTCCGCCCTTTCCCAGGCGCATGCGCAGAGCGACTCtttttttttttttttttttaaaCTGACTCGTGACTGC	414	1	y	3.7e-09	+++++++++++++++
chr1:179803474-179804118	151	GCGCACTGCCCGAACCCCACACACACAGCCTCTCCGCCCAGGGAAGGATCGTGGCCAGGGCGGGGATCCGATCGC	168	3	n	9.8e-05	++++++++++ + +
chr1:179803474-179804118	526	TTCCGTCTATGACTGCTGCTCTTGCCTCCGTTTTTTCCGTTCTGTGCTCCAACTCTTCAAGGAAACGCACACACA CACACAAAACCCAGACTTACTGAGAAACTCTTACTCTCATTTTT	540	2	n	2.7e-05	++++ +++++++
chr1:179803474-179804118	526	TTCCGTCTATGACTGCTGCTCTTGCCTCCGTTTTTTCCGTTCTGTGCTCCAACTCTTCAAGGAAACGCACACACA CACACAAAACCCAGACTTACTGAGAAACTCTTACTCTCATTTTT	591	3	n	1.4e-08	+ +++++++++++++
chr1:9748286-9748754	76	CGGCCACCACCCCACCCCGCACTCACACTCACTCACTCTCGCTCTCTCCCTCAGACACAGACATACACGCCCTCA	93	3	n	1e-05	+ +++ +++++ +++
chr1:9748286-9748754	76	CGGCCACCACCCCACCCCGCACTCACACTCACTCACTCTCGCTCTCTCCCTCAGACACAGACATACACGCCCTCA	131	3	n	3.2e-06	++++ +++ ++++ +
chr1:9748286-9748754	226	TGCTAGGCGCTTCCGTCCAGAAAGAACTTCAAATACCGTGATGCAAAGCGACTCGACGCACGCGGGGAGGAGGAA GAGGAAGGCACTCGGAAGGTGGGGGCAGAAAGGAAGTCGATGATTCGCGGAGCTTGTCGGTAGTTGTATTTTTAA	294	2	y	3.5e-07	+++++ +++++ +++
chr1:9748286-9748754	226	TGCTAGGCGCTTCCGTCCAGAAAGAACTTCAAATACCGTGATGCAAAGCGACTCGACGCACGCGGGGAGGAGGAA GAGGAAGGCACTCGGAAGGTGGGGGCAGAAAGGAAGTCGATGATTCGCGGAGCTTGTCGGTAGTTGTATTTTTAA	315	2	y	2.5e-05	+ +++ + +++++
chrX:145505195-145506196	1	AGGACCGCCCACAAGGAGGGGGGTGGATGATGGAATGGGCAGGGCCGAGGGCGGAGCCAGCAGGGCGGGAGGCCG GAGGGAGGCTGGCAGGACCCTGGCGAAGGGGAGGAGGCGGCACCCCAGGAGGCCAGGCGGCCTTCAGGCGGGGAA	69	2	y	9.4e-05	+ + + ++++ +++
chrX:145505195-145506196	301	GAAAGGAAGGCATGGGGTTCGATTTTTGGTTTGGTTTGATTGGTTGGTTGGTTGGGTTGGTTTTGTTGATGTTGT TGttttcttttcttttcttttcttttcttttcttttcttttcttttcCAAAGACTTCAGTAGTCTATGGCGGCAG	323	1	y	1.5e-05	+++++ +++ ++++
chrX:145505195-145506196	301	GAAAGGAAGGCATGGGGTTCGATTTTTGGTTTGGTTTGATTGGTTGGTTGGTTGGGTTGGTTTTGTTGATGTTGT TGttttcttttcttttcttttcttttcttttcttttcttttcttttcCAAAGACTTCAGTAGTCTATGGCGGCAG	372	1	y	8.2e-06	++ ++ ++++ ++++
chrX:145505195-145506196	526	AAAACAAAAACAAACAAAACAAACAAAAGCACGGAACCAAAGCGTTACAAAATTCAGATACAGCTCTCTTTCGTC TCCCTCCCTTGTTTCCTTTGACCAGCTGGCAGCCTACACAAGGCAAACCCCACAAGATCCCCCTTTTTCTTCTGT	533	1	n	9.7e-08	++++++++++++ ++
chrX:145505195-145506196	526	AAAACAAAAACAAACAAAACAAACAAAAGCACGGAACCAAAGCGTTACAAAATTCAGATACAGCTCTCTTTCGTC TCCCTCCCTTGTTTCCTTTGACCAGCTGGCAGCCTACACAAGGCAAACCCCACAAGATCCCCCTTTTTCTTCTGT	593	2	n	6.1e-05	+ + + +++ +++++
chrX:145505195-145506196	676	CACCCTGCCCCACCAGCCTCAACCTTCATAAACCTTCTGCCCCAGCCTCTTGCCCCAAATTTCTAGAAGGGTCTA	688	2	n	5.8e-06	++ +++++ +++ +
chrX:145505195-145506196	676	CACCCTGCCCCACCAGCCTCAACCTTCATAAACCTTCTGCCCCAGCCTCTTGCCCCAAATTTCTAGAAGGGTCTA	711	2	n	1e-06	+++++ + +++++
chr18:60848895-60849221	151	ACTAGCTCTGCCATTGGCTCGAAGGCGTGTCCCGATCTAGACCCGCCCTCTGGGCCGCCATGATTTaaaaaaaaa aaaaaaaaaaaaaaGTCTCCTGCATCTTAATTCTTACCCTTTGAAGGGATTTACTGTCTAGGTTTTTTGATGCCT	217	1	n	3.7e-09	+++++++++++++++
chr7:45896670-45897185	226	CATTACCTTTaaaaaaaaaaaaaaaaaaaaaaaaaaaaaaGGACTAGCGATGAGGCATGCGCAGTTGAGATAAAG	236	1	n	3.7e-09	+++++++++++++++
chr7:45896670-45897185	226	CATTACCTTTaaaaaaaaaaaaaaaaaaaaaaaaaaaaaaGGACTAGCGATGAGGCATGCGCAGTTGAGATAAAG	251	1	n	3.7e-09	+++++++++++++++
chrX:42068088-42068750	76	GCCAGTGGCTGGGCGAGCCCGGGAAGCTGGCGGGCTGCACCGGTTGAGTTTTTTTTTTTTTTAAAAGTCCTGACG	124	1	y	3e-07	++++++++++++++
chrX:42068088-42068750	151	TGGATGCACTTGGTTCCGGTCTTCGAGTTTTATCCGATGGGACTGTCCTGCCTGGGAAGGCCGAGGGAGGAAGGA	206	2	y	9.2e-07	+ ++++ ++++ +++
chrX:42068088-42068750	376	GACTGGAGTGCTTGGCGCGGTGGGTACAGCTCTTGTGGGTTTCCCGccctcccttcctctccctctgctcccctc	427	2	n	6.7e-07	+++ +++++ ++++
chrX:42068088-42068750	451	ccctcccttcccctcccctctcttccctctcctctcctctgctctgctcttccctccctcctcctccctcctccc	452	2	n	6.7e-06	+++ +++ +++++
chrX:42068088-42068750	451	ccctcccttcccctcccctctcttccctctcctctcctctgctctgctcttccctccctcctcctccctcctccc	503	2	n	1.7e-06	+++ ++++ +++++
chrX:42068088-42068750	526	gcgttcctcctcctcccccctccttccttctcccccccttctcctccctccctccttttccttcccTCCATTTCT TCCCCCTCCCTTCCGCCTGGGCTAGCTCTGCCTAGTTGGGCGGGAAggccgcgcccgcccgc	531	2	n	4.1e-05	+++ + ++ ++ ++
chrX:42068088-42068750	526	gcgttcctcctcctcccccctccttccttctcccccccttctcctccctccctccttttccttcccTCCATTTCT TCCCCCTCCCTTCCGCCTGGGCTAGCTCTGCCTAGTTGGGCGGGAAggccgcgcccgcccgc	562	2	n	1.2e-05	+++ + ++ +++++
chrX:42068088-42068750	526	gcgttcctcctcctcccccctccttccttctcccccccttctcctccctccctccttttccttcccTCCATTTCT TCCCCCTCCCTTCCGCCTGGGCTAGCTCTGCCTAGTTGGGCGGGAAggccgcgcccgcccgc	599	2	n	3.8e-05	+ + ++ ++ +++ +
chr15:102671012-102671384	1	CTTACCTGCTCCCAGGGCAGAGAAGACAGAGAGGGGCGGGGGCGCGGGAAGCGCGAGGGAAGGCTCTGCGCATGC	22	2	y	1.8e-05	+ ++ +++++ ++
chr15:102671012-102671384	301	TTTGGAGTCTTGGACTCGAGTCCCCTTTCCGAGCATGCGCAAAGTTAAGGAAAAAAAAAAAAACCAAAAAAC	353	1	n	8.2e-08	+++++++++++ ++
chr16:4879825-4880875	451	GTCGTGCAGGAAGAGCGTCTTaaaaaaaaaaaaaaaaaaaaaaaaaaaaaaaaaGACAGCCCCTGCTCCGGAGCC	472	1	n	3.7e-09	+++++++++++++++
chr16:4879825-4880875	451	GTCGTGCAGGAAGAGCGTCTTaaaaaaaaaaaaaaaaaaaaaaaaaaaaaaaaaGACAGCCCCTGCTCCGGAGCC	487	1	n	3.7e-09	+++++++++++++++
chr16:4879825-4880875	751	AAACAAAGCTGGCCGCCCAATGAggcggcggcgggggcgggcgcATCACGTGGCGTGGGGGCGGGGTCGGGAGCT	777	2	y	4.6e-05	++ +++ + +++ ++
chr14:101608970-101609344	1	TAGTCCAATGGAAAATAACAAAAACAAACGTGGCCTCGAGCAGGCAGCTCCTGCACCCGCCGATTCTGCAGCCCA	14	1	n	2.6e-06	++ ++ +++++ +++
chr14:101608970-101609344	151	TAAAGCCGGCTGCTACTCCGCCTCTAGTCTACGGGCGCAGAGCTTTGCCAAGAAGCTGAGGTCGCCTCCCTGCCT CCTCCTCCGGCCTCCGCCCCTCATCTCGCCTCGGGGGGCAGTCGTACCCAGCTTGGCGAGGGCACTTCCCGGAGC	219	2	n	2.6e-07	++++++++ +++++
chr13:52981143-52981462	1	gccgccactggccgcgccgACAGGGGCGGGCTCCCCAccgccccgccccgccccgccccgtccTCTCCGCCGCGG	52	2	n	9.4e-05	++ +++ + ++++
chr13:52981143-52981462	226	ATTGCCGGCCGCGCCCTCCGGGTCGCTGCGCTCGCTCCGTGGTGCCAGCACCTTTTTTTGTTTGTTTGTTTCCCG	278	1	y	1.5e-08	+++++++++++++++
chr4:117835190-117836817	1	GGACCAGGGCGGGGGAGGGCGGCCAGGGGAGCCGCTCAGGGAGGGGAGGGACTTGGCTAGGTTTCTCAAGCCTTC TTCACTCTCCAAACTTTCACCAAACTCTTAGCCCCCGCCTCCCCGAAACCAAAACACAACAAGCTCTGGAGGAGC	71	2	n	1.8e-05	+++ + ++ ++++
chr4:117835190-117836817	1	GGACCAGGGCGGGGGAGGGCGGCCAGGGGAGCCGCTCAGGGAGGGGAGGGACTTGGCTAGGTTTCTCAAGCCTTC TTCACTCTCCAAACTTTCACCAAACTCTTAGCCCCCGCCTCCCCGAAACCAAAACACAACAAGCTCTGGAGGAGC	103	2	n	7.8e-05	+++ + ++++++
chr4:117835190-117836817	1	GGACCAGGGCGGGGGAGGGCGGCCAGGGGAGCCGCTCAGGGAGGGGAGGGACTTGGCTAGGTTTCTCAAGCCTTC TTCACTCTCCAAACTTTCACCAAACTCTTAGCCCCCGCCTCCCCGAAACCAAAACACAACAAGCTCTGGAGGAGC	121	1	n	2.4e-05	++++ ++++ + ++
chr4:117835190-117836817	151	GGCAGGCAACGCGGCGGGGCGGGAGGACTGGCGGCTGCAGAGAGCCTCGGGAGGCTGATGCAACTTTCCCTTTAA	200	2	y	6.5e-05	++++++ ++ +++
chr4:117835190-117836817	376	GAGCCCCAGGATGTGTATGGATGTGTGTGTGGTGCGTGGATGAGATAGCGTTTGCTTGCGGGTATCTGTGGCTAA	388	3	y	2.8e-06	++++ ++ ++++++
chr4:117835190-117836817	451	GAGTGTGAGTGCTCGCACTGGGATGTCTGTCTCGCCGCGAAGGTCTGGGTAGGTGCGTGTGTCTGTGTGTCATCG	505	3	y	2.3e-07	+ ++++++ ++++++
chr4:117835190-117836817	1576	CAAAGCCTGTTCTACTTTTTTTCCTTTTTTTCTTGTTTTTTGGttttgtatt	1600	1	y	2.6e-06	+++++++ ++ ++++
chr5:125270769-125271918	76	GACAGCCTTTACTGCACAGCTGCCCTTGACTACTAGGCTTATTCTCTCTACCCGGGGACATCCCTTAGCCACCAG CCTCTGCCTCCCATTCTCCTTCTAGGGAACCCAGCCCAACACGATCCCAACACACAGAAGGGCATTAGGCACATG	147	2	n	2.3e-08	++ ++++++++++++
chr5:125270769-125271918	301	GTGCCTAATAGTTGCTTTCTGGGAGCTGGGCATCCAAGCGTTTTTATTGTAGTCCCATCTCCGGAGAGATTGCGC ACACACCCACTTTTATTtcttatttattttgtaaataagtaattgctatgtaatacaggttggcctcaatgtcat	371	3	n	6e-05	+ +++++++ +++
chr5:125270769-125271918	301	GTGCCTAATAGTTGCTTTCTGGGAGCTGGGCATCCAAGCGTTTTTATTGTAGTCCCATCTCCGGAGAGATTGCGC ACACACCCACTTTTATTtcttatttattttgtaaataagtaattgctatgtaatacaggttggcctcaatgtcat	386	1	y	2.6e-05	++++ +++ ++ +++
chr5:125270769-125271918	451	ggttgtcctgcctcaccctgttgagttctgCACCGCCATGCATCTCCTGTTCTAGCGTCATAGAGGCTGCCAGAG	457	2	n	5e-06	++++++++ +++
chr16:94526433-94527158	76	CGCCACACCTCACACACCTCCCTCCTTCGGGCACAGGGCGTGGCTTAGCGCGGACAGGGGCACGAAACCCACAcg cgcgcgcgcgcgcgcgcgcgAACACACACACACACACTTCCGGAACGCGGGAGTGTGCTCTCTGTTCTCCCGGCG	145	3	n	3e-05	+++++ + + + + +
chr16:94526433-94527158	76	CGCCACACCTCACACACCTCCCTCCTTCGGGCACAGGGCGTGGCTTAGCGCGGACAGGGGCACGAAACCCACAcg cgcgcgcgcgcgcgcgcgcgAACACACACACACACACTTCCGGAACGCGGGAGTGTGCTCTCTGTTCTCCCGGCG	173	3	n	7.7e-10	+++++++++++++++
chr3:88509842-88510309	76	AGGCCTTCCTCAGCTCCAGCTTTCCTCTCCACCAGCTTGCGGGGAGAGAGGGGAGGGCAGGTGATGGTGGTGGAG	79	2	n	4.6e-05	+++ ++++ ++ +
chr3:88509842-88510309	76	AGGCCTTCCTCAGCTCCAGCTTTCCTCTCCACCAGCTTGCGGGGAGAGAGGGGAGGGCAGGTGATGGTGGTGGAG	122	2	y	3.1e-05	++++ ++++++
chr3:88509842-88510309	301	CGCACGCTATTGCGTGTGGGCGGCCGCATGTGAGCCTGTGTGTATCTGTGTGTGTGGTTGCTGGGGCCTCCCCGG	338	3	y	9.6e-08	++++++ + ++++++
chr19:8713004-8714010	76	TTGGGGGAGGGGAGAGGAGAAAGATGATGTGCTGAGTCAGGCACCCTTAGGAAGAAGTAGGGGTCCGGCTAGCGt ttttttttttttttttttaaaGAAAGGGGGGGGGATTTTTGCCAGGGAGTCGTCCCAAAAAAAATAGGTTGCAGT	150	1	y	3.7e-09	+++++++++++++++
chr19:8713004-8714010	526	CGCACCCAGCCAGGGCTGCCCGCTACCTTCAGTAGCTCCTCCTTGGATAAGCCGGTGAACTTGACCCCGGCCTCC GTCTCGTCCTCCGCCACCTTGATCTTCACCAGACCGTTCTTCTCCCCGGCCGCCGCCCCGTCCGCTGCATTCATG	598	2	n	5e-05	+ + +++ +++++
chr19:8713004-8714010	751	GCAGAAACGGTGACACGACACGGCCTGTAGTCAGTGAGGCAGCTCTAATCCTGCCTGGATCCCCGTTCAGAGAGG	800	2	n	9.4e-05	+++++++ + ++
chr19:8713004-8714010	826	CGTCCCGTGGCCGTGAGGCTAGCAGAGCTTCCTAACTGCTTCTGCCGCTGGGCGGGTGTGGCGGCGGGGAAGTGA	860	2	n	2.5e-05	++++ ++++++ +
chrX:73914913-73915331	376	GACGCAGGTTTTTtttttttttttcgagacagggtttctctga	384	1	y	3.7e-09	+++++++++++++++
chr13:5845294-5845989	301	CAGAATTACGGTGTCATCGAGTGTGACTGTATGTAGCTGGGCATACATTCATTTCCCCACTCAGATTAGCTATAG	319	3	y	6.9e-05	+ +++++ +++ ++
chr13:5845294-5845989	601	ATATTCCGTTTTGTTGGCTCGTTTGAAAAAAAAAAAAAAAACCTACCGCAAGGCAACCATGCTTGTTTTCAGGTT	626	1	n	3.7e-09	+++++++++++++++
chr2:167043483-167043753	226	CCTGCCAGGGCCCCTCTGACCGACCATAGCttttttttttttttt	256	1	y	3.7e-09	+++++++++++++++
chr16:75766779-75767145	226	GGAGCAGCGTCTGGGAAAGGCCAGAGTTTGTCATTCATCAAACCCAAAACGCTGCGAGCTTACTCGCGGTTaaaa aaaaaaaaaaaaaaaaaaaaaaaaaGTCCCTGTAGCCCCGCCTCACCGCGTTGTATTGTGGGAACT	297	1	n	3.7e-09	+++++++++++++++
chr16:75766779-75767145	226	GGAGCAGCGTCTGGGAAAGGCCAGAGTTTGTCATTCATCAAACCCAAAACGCTGCGAGCTTACTCGCGGTTaaaa aaaaaaaaaaaaaaaaaaaaaaaaaGTCCCTGTAGCCCCGCCTCACCGCGTTGTATTGTGGGAACT	312	1	n	2.9e-05	++++++++++++++
chr9:101034527-101035091	301	CACCGCCCGAATCCTAATCGCCGCCGCCAtttttttttttttttttttttGACTGCCAGCGTGACACACACTGCA	330	1	y	3.7e-09	+++++++++++++++
chr4:129189539-129190059	1	ACCTCCGGAAGCCGGGCCAAAAGCCTGGGCGAGCGGCAGCACCTCACTCCGCCCCCTGCGCCATTTTATCGCCCC	42	2	n	2.2e-05	+++ +++ +++ ++
chr4:129189539-129190059	151	ACCGCCCCGCCCCTGAGAGGGTGCGTCATGGGCGGCCTTCCTAACCCCGCCCCCCAGCTCCACCTACACTGTTTT GGTTTTTTTTTTTTTGGATGGTTCCGCCCCTTCCTGTTTCATCGATTCTTTCGACTCTCTGCTGCTCCTGACTCG	224	1	y	8.2e-08	++ +++++++++++
chr4:129189539-129190059	301	GGGATGCTCGGGGAGAGGAGGGGACAGACAGAATCTAGGCCTAGCAAGCGGAGCGACGAGCTCAGCTGATGCAAC	314	2	y	8.3e-05	++++ + + +++
chr4:129189539-129190059	451	GCGCGGGAAACAGAGACAGCGGAGCCATGGGTGATGCTCCAAGCCCTGAGGAGAAGCTGCATCTTATCAC	456	2	y	4.6e-06	+++ +++++ +++
chr16:3122992-3123171	76	CAATAACATCACTGGTCTGATTCCCTATTTGTGGAGTGTGGCCACTGAGCCCTACTAAGTGGAGATCAATGTTTT TTGTTTTTGTTTTTCTGGATAttttcgag	148	1	y	5.1e-08	+++++ +++++++++
chr7:102065113-102065652	226	GAAAAGTTGTTCTTGAACTATTTCATTGTAAACATGGCACCAGTCCGCACTGTGGAGAGGAAAAGGGAGAGTCCC	281	2	y	1.9e-05	++++ + +++ ++
chr7:102065113-102065652	376	CCATGCTGCACTGAGTCCGACCCGGAAATTTAAGTCCCACTCGCTAAGGGCGGACTGGAGCGTGtaaaaaaaaaa gaaaaaatatatatataCACGCACGCGGGGTTTTGTTATTTTGTTTTTAGATGTAGTAACTGCTGTATTTCCTCT	441	1	n	1.6e-07	++++++++++ ++++
chr7:102065113-102065652	376	CCATGCTGCACTGAGTCCGACCCGGAAATTTAAGTCCCACTCGCTAAGGGCGGACTGGAGCGTGtaaaaaaaaaa gaaaaaatatatatataCACGCACGCGGGGTTTTGTTATTTTGTTTTTAGATGTAGTAACTGCTGTATTTCCTCT	482	1	y	2.6e-06	+++ ++ ++++++++
chr7:106529174-106529381	1	CAGATAGGGCTCTATGAGGTCAGAGACTGAAATCACACTCAAAACCAGGCACCTCCCTTTTCCTTCCTGTTCCAC	52	2	n	9.9e-06	+++ +++ + +++ +
chr7:106529174-106529381	151	TTTACGTGAGTTTTAGAGAAAAAATGAACAAACAATAAAACAAACAAAGAAAAAACC	184	1	n	5.2e-07	++ ++++++++ +++
chr11:80383167-80383485	76	AAGCCTGCGTCACGTGACCCGCACAGCTCTCACCGCGGTGGCTGATGGGAGGTGGAGATAGAACGAGGGTGTCGG	123	2	y	1.2e-05	+++++ +++ ++
chr11:80383167-80383485	151	CCATTTTGTGTCTGTTTCCTGCGGGACGCGCTGGTGGCGGTTGGTGTGGAGAACTCTGCGAGTCTCTTGGGTTTT TTGTTTTTTGTTTTTTCCAGCTTCTTTCCGCCTCTATTCTGCCTGTTCTGTAGGGCGCAGTTATGGGTCGCAAGA AGAAGAAGCAGCTCAAGC	153	1	y	8e-05	++++ +++ +++++
chr11:80383167-80383485	151	CCATTTTGTGTCTGTTTCCTGCGGGACGCGCTGGTGGCGGTTGGTGTGGAGAACTCTGCGAGTCTCTTGGGTTTT TTGTTTTTTGTTTTTTCCAGCTTCTTTCCGCCTCTATTCTGCCTGTTCTGTAGGGCGCAGTTATGGGTCGCAAGA AGAAGAAGCAGCTCAAGC	224	1	y	9.7e-08	++++ ++++++++++
chr11:80383167-80383485	151	CCATTTTGTGTCTGTTTCCTGCGGGACGCGCTGGTGGCGGTTGGTGTGGAGAACTCTGCGAGTCTCTTGGGTTTT TTGTTTTTTGTTTTTTCCAGCTTCTTTCCGCCTCTATTCTGCCTGTTCTGTAGGGCGCAGTTATGGGTCGCAAGA AGAAGAAGCAGCTCAAGC	246	2	n	5.7e-05	+ + ++ +++++
chr11:80383167-80383485	151	CCATTTTGTGTCTGTTTCCTGCGGGACGCGCTGGTGGCGGTTGGTGTGGAGAACTCTGCGAGTCTCTTGGGTTTT TTGTTTTTTGTTTTTTCCAGCTTCTTTCCGCCTCTATTCTGCCTGTTCTGTAGGGCGCAGTTATGGGTCGCAAGA AGAAGAAGCAGCTCAAGC	298	2	y	6.9e-05	++ + +++ ++++
chr5:64780838-64781061	1	TGGGCGGGGCAGGGGAACTGAGTCAGGGAGACAAACAGGATGCTGGGAGGTGAGAAATAAGGGTGGGGAGTAGTG	13	2	y	2.9e-05	++ + +++ ++++
chr5:64780838-64781061	76	GGGAGTCTGAAGAGGAACTAACAAGATCTGTTGCTTATAGTTACCCAGAAACCCTTCAGAACAATAACACACAAA CAAACTTAAAAGGAAGAAGCTGCAGGAGAGGGCTTCCAGCGGAGGAGATCAGCTGGTGTTCTGGTGTTGGGGG	140	1	n	9.4e-06	++++ +++++ +++
chr2:32757101-32757885	751	GCTTtttgtttgtttgtttgtttgtttTCCCgac	755	1	y	4e-08	+++ +++++++++++
chr1:118388918-118389528	301	ACGGGTCGCCATTCGGGTCAAAGGCAAAGGCGGCGGGACCTGAAACTTCATGCGGGCCCCAGCGCTGGGCGTTAC	320	2	y	9.4e-05	+++++ ++++ +
chr1:118388918-118389528	451	CACAGGGAGACCTCTCTGCGCAGGCGCATTTTGGtttttcattttttttttttttttttttAATCCCCGCACCAA	492	1	y	3.7e-09	+++++++++++++++
chr4:144892317-144892916	151	GACTTAATGGGGTATTaaaaaaaaaaaaaaaaaaaaaaaGGAGGGGGCGCCCTTTCGGTCCACGCCGCAGCTGCC	167	1	n	3.7e-09	+++++++++++++++
chr4:144892317-144892916	301	GTTGGAAAGAACAAAAAAGAAGGCAATAAATACTAAAGGGGAGGGGGGAAGAGAGGGAGCCACACCGAGCGGCAA	307	1	n	4.6e-05	++ ++ ++++++ ++
chr9:53610181-53610581	301	aaaaaaaaaaaaaaaaaaaaaaaaaaaaaaGGACTAATGACCACGTGGCTTGACACCTAGGTGGTGCACGCTAAA	301	1	n	3.7e-09	+++++++++++++++
chr9:53610181-53610581	301	aaaaaaaaaaaaaaaaaaaaaaaaaaaaaaGGACTAATGACCACGTGGCTTGACACCTAGGTGGTGCACGCTAAA	316	1	n	3.7e-09	+++++++++++++++
chr2:3658014-3658309	151	AAAGATAGCAAGGCATGTTTGTTCACACAAATAAAATGTCAGGTTCTCTTTTTGcctcctcttccctccctctat tcccctcccatttccccctcctacctccccctctgcctctgcctccgcctccgcctcccctccccctctc	195	2	n	1.1e-05	++ + +++++++
chr2:3658014-3658309	151	AAAGATAGCAAGGCATGTTTGTTCACACAAATAAAATGTCAGGTTCTCTTTTTGcctcctcttccctccctctat tcccctcccatttccccctcctacctccccctctgcctctgcctccgcctccgcctcccctccccctctc	215	2	n	1.2e-05	+++ +++++ ++
chr2:3658014-3658309	151	AAAGATAGCAAGGCATGTTTGTTCACACAAATAAAATGTCAGGTTCTCTTTTTGcctcctcttccctccctctat tcccctcccatttccccctcctacctccccctctgcctctgcctccgcctccgcctcccctccccctctc	257	2	n	2.4e-09	++++++++++++++
chr1:13589763-13590201	76	CTCGCTGGGGCTTCACTTCCCATCCCACAGCCAGTACGCAGCCGCCGGGGCGGCCCGAGaaaaaaaaaaaaaaaa aaaaaaaaaaaaaaaaaaaaaaaaaGGCCAGCCTGCAGCGGTGGCGAGCATGCGCACCAGGAAGAAACCGCGCGC	135	1	n	3.7e-09	+++++++++++++++
chr1:13589763-13590201	76	CTCGCTGGGGCTTCACTTCCCATCCCACAGCCAGTACGCAGCCGCCGGGGCGGCCCGAGaaaaaaaaaaaaaaaa aaaaaaaaaaaaaaaaaaaaaaaaaGGCCAGCCTGCAGCGGTGGCGAGCATGCGCACCAGGAAGAAACCGCGCGC	150	1	n	3.7e-09	+++++++++++++++
chr4:11485784-11486174	1	CAAACACCGTAGTCCCCGCCCCTCTTTTTTTTTTTTTTTCCCTGCCCCTTTGGGCTCGCAGAAGGCGCCCTCCGC	25	1	y	3.7e-09	+++++++++++++++
chr19:8722983-8723599	526	AAGTACTCTACGTCTTTATGTGCTGTAGttttcactttgtttttttcttgtctttctcttttttttttttttttt	556	1	y	5.2e-05	++ +++ ++++++
chr19:8722983-8723599	526	AAGTACTCTACGTCTTTATGTGCTGTAGttttcactttgtttttttcttgtctttctcttttttttttttttttt	584	1	y	3.7e-09	+++++++++++++++
chrX:77795893-77796195	226	AAGTAATGGAGGGGGCTGCACTGGGGCCACGGGGTCCAGCTTGACACACACACACGCACGCACACCATGGGtctc	270	3	n	8.8e-09	+++++++++++ +++
chr4:43656441-43656936	451	ACCttttttttttttttttttttttttAAAATCTGTAGGGTAGGC	454	1	y	3.7e-09	+++++++++++++++
chr6:125039638-125039942	1	AGGGCGGAAGCCAGGCTAAATCAGCCTCGCTGTAGATGACCGTGAATAGGCGCAAAAAAAAAAAAAAAAAAGTTC	54	1	n	3.7e-09	+++++++++++++++
chr1:64078843-64079173	226	GTGTAGCTGTCTAGAGAAGAGCTGGTTGGCTGGAGGCTGAGGCAGGTCTCAGATAGCAACTTGTCCCGAGAGAGC	257	2	y	8.6e-10	++++++ ++++++++
chr10:80684363-80684575	151	CAAACTTACAATTTGGGAGGCAGAAGCAGGAGGATCGGATCGGCATAAACTGGAAGTCAGTG	166	2	y	5.9e-09	+++++++++ +++++
chr10:112002340-112002906	301	TCAGAGGCTTTTTCTTTAAAAAAAAAAAAAAAGTGTATCGTGCAATCTAACTCCTCCGACCCAACCCCCACCTTC	318	1	n	3.7e-09	+++++++++++++++
chr3:65392516-65392882	226	GGCGCCTCAATGCCACAAAGAATGAAGGGATTTGTAGTTTAGTGTGTAGTTTAGAGCTGCTCTCTAACTCGCCTG CCTCAGTCTCCAGAGACAGGCTTGGATAATCGAAATGAGCAACCATACAAGCAGTACTGTTTtaac	297	2	n	1.4e-08	++++++++ + ++++
chr1:16104393-16105962	151	AGTCACGGCCAGCCAACTTTATGGTAAAACTCATCGGAAAACAAATGCACTGAATACAttttttttttttttttt	209	1	y	3.7e-09	+++++++++++++++
chr1:16104393-16105962	826	TGGAAGAGGGGCTGCCCCgcgcggtggggcggccggcgggagggcgagcggggaggggaggctgggccgggggcg	882	2	y	2.4e-05	++++++ + + + ++
chr1:16104393-16105962	1351	ACGGACGGACGGACGCTGTGGGACAAACAGGCGGCCGCCAGCAGGAGGCGCCGAGCCGGGAGCAGCGGCAGGCAC	1408	2	y	1.3e-05	++ ++++ ++++++
chr4:134853336-134854215	526	GACAAAGCAAACcacacacacatacacacacactcacacacacCCTGCCAGCTTCCCGCGACGTGGTGACAGCGC	542	3	n	1.7e-09	++++++ ++++++++
chr5:140749236-140749916	76	GGCTCCTGGAGAGGTACAAGGTGAGGCGGGGAAGCCACACAGAGGAAGTGAGAGGGGACAGAGTGTGTGTGTGTA TagagagagacagagagatagagatagagacagagagaACACCAAATGACATGCATGCACCATCATTCCAGAGGG	138	3	y	8.7e-08	++++++++++++ +
chr5:140749236-140749916	76	GGCTCCTGGAGAGGTACAAGGTGAGGCGGGGAAGCCACACAGAGGAAGTGAGAGGGGACAGAGTGTGTGTGTGTA TagagagagacagagagatagagatagagacagagagaACACCAAATGACATGCATGCACCATCATTCCAGAGGG	170	2	y	3.1e-06	+++ ++++ +++
chr5:140749236-140749916	526	GAGGTGCTGCCCTCTGCTGTCAGCATGAAGTGTTGCTACAAGTAACCTCCAGCCTTTATCTCTGTAGGAAGGCTC	574	2	n	2.7e-05	++ ++++ + +++
chr8:120596161-120596299	76	ggtggtccacacctatcaccccagcactcaggaggctgagacaggaggattaatagttcaggc	106	2	y	1e-08	++++++ +++ ++++
chr17:15084319-15084569	76	GCTACTAGAAAAAAAAAAAAAAAGAGGCCAGGAGTACGGGGGTAGGGTTCCCCCACTGTCCACGGCAGCTTCCCA	84	1	n	3.7e-09	+++++++++++++++
chr14:65102629-65102829	151	ttggtttaaaaaaaaaaaaAAAAAAGATTTAACAAAAGTGGAAAACTACC	158	1	n	3.7e-09	+++++++++++++++
chr5:138622755-138623017	1	AGAACCTGAAGCTCTGTCCAATCAGAGGCCCTAGCCTCAAGACGTGCCCAATCAGACACACAAACGGAGGGTAGG GGCGGGCTTTGGCTGTCAACCAGCCTTTGTCTGGGACCCTCCATATTGGAATCACTGTATGCTGCTAGGGAAGCT	50	1	n	2.4e-05	++ ++ +++ + +++
chr5:138622755-138623017	1	AGAACCTGAAGCTCTGTCCAATCAGAGGCCCTAGCCTCAAGACGTGCCCAATCAGACACACAAACGGAGGGTAGG GGCGGGCTTTGGCTGTCAACCAGCCTTTGTCTGGGACCCTCCATATTGGAATCACTGTATGCTGCTAGGGAAGCT	67	2	y	6.5e-05	+ ++ ++ +++ ++
chr5:138622755-138623017	226	TGGACATGGTGAGTGTACGTGTGGCGCCCGGAGGTGA	234	3	y	2.6e-06	+++ ++++ +++++
chr15:59648149-59648837	1	TGTTGTGTGAATGATGCGCGCGCACCAATCAGCGGTCGTTTCGCCCCTGCTGCCCCGCCCCTCCCGCCCACTTCC	54	2	n	4.1e-05	++ +++ ++ ++ ++
chr15:59648149-59648837	76	CCGGGAACCTGACGTCACGGGAGCTTTGCCTCCGCCCCCTCCCTGGGCTACGGGCCCGCGGGCCTGCGGTGGGGC	100	2	n	5.4e-06	++++++ +++ ++
chr15:59648149-59648837	151	GCGCGCAGCCTGCTGCCCAGCCCAACCCGGGGGGCGTGTGCGCGCGCCCAAGGCGTCCCAGGACGTTCCCACCTG	182	3	y	6.9e-05	+ + +++++ + + +
chr15:59648149-59648837	226	CGCCTCGGCGCGCGCGGTCAGGAGCATCCCCAGGCCTCCAGCCACCCCTTACAGTTCCAGCCTCCAACTCCACCT	282	2	n	5.7e-05	++ +++++ ++++
chr15:59648149-59648837	301	CCCCTCCCCCCTAGTCTCCTCCCTCCGCTCCGGTGACTGCAAGCCGGGCGACGGGGCCGGAGTCGTCGCAGCCAC	318	2	n	9.4e-05	+++ ++++ ++ +
chr15:59648149-59648837	376	CTCATTGCACAACCCGGCTTCCCAACTGTTTACACAGCCCGGGCTGTGAGTGTGTGTGTGTATACAGCGTGAGTC	421	3	y	5.1e-08	+++ +++++++++++
chr15:59648149-59648837	451	ACCGggaggcggaggaggtggaggaaaaggagaaggagTGCACTGGCCGGGATCAGTGCGGCACACACACTCATA GTCGGTCACTCTCTCTCTCTCTCCTGGAGCGCGTCTCGCTCGCTCACACGCCTGGAGCCCAGGAGCGCGCAGGAT	464	2	y	3.3e-05	+++++ ++++ +
chr15:59648149-59648837	451	ACCGggaggcggaggaggtggaggaaaaggagaaggagTGCACTGGCCGGGATCAGTGCGGCACACACACTCATA GTCGGTCACTCTCTCTCTCTCTCCTGGAGCGCGTCTCGCTCGCTCACACGCCTGGAGCCCAGGAGCGCGCAGGAT	512	3	n	8.9e-05	+++++++++ ++ +
chr15:59648149-59648837	451	ACCGggaggcggaggaggtggaggaaaaggagaaggagTGCACTGGCCGGGATCAGTGCGGCACACACACTCATA GTCGGTCACTCTCTCTCTCTCTCCTGGAGCGCGTCTCGCTCGCTCACACGCCTGGAGCCCAGGAGCGCGCAGGAT	535	2	n	6.2e-06	++ ++++ ++++
chr6:119848102-119848608	76	gcacacctagccccaccccctgtcgcccgcgcggcgccctcgccccgcctcccgctctcccgggccgctgggctt	113	2	n	2.5e-05	+++ + + ++++++
chr6:119848102-119848608	226	CCGAGGCCGCGAAGGTAACTGGGTGCCGAGGCAGGGTTGCGCCACACGTAGCGCCGCCCCTCACACACACACCCA CACCCACACCCACGGCCGAGCGTCCACCGGGAGCCCGGGCCGCGATATTGAGCGAGGAAGGTGCGGACGAGGAGG	246	2	y	3.6e-06	++ ++ ++++++++
chr6:119848102-119848608	226	CCGAGGCCGCGAAGGTAACTGGGTGCCGAGGCAGGGTTGCGCCACACGTAGCGCCGCCCCTCACACACACACCCA CACCCACACCCACGGCCGAGCGTCCACCGGGAGCCCGGGCCGCGATATTGAGCGAGGAAGGTGCGGACGAGGAGG	289	3	n	1.4e-07	+++++++++ +++++
chr12:71051152-71051352	1	acagacatctctacctccagctccaggcgatccagtgccctcttctggcttactcaggcactgaatgcatatgga	10	2	n	6.5e-05	++ ++++ ++++
chr12:71051152-71051352	76	gcacttgtgtatgcaggcagaaacatacatacacattaaaaaagaGAAGTCtctttattcttttaattttttttt cttttatgagcacactgtggctgtcttcagacacaccagaaaaggaaatc	99	3	n	3.7e-05	++ +++ +++++
chr12:71051152-71051352	76	gcacttgtgtatgcaggcagaaacatacatacacattaaaaaagaGAAGTCtctttattcttttaattttttttt cttttatgagcacactgtggctgtcttcagacacaccagaaaaggaaatc	142	1	y	4.1e-06	+++++++++ ++++
chr19:46045026-46045565	1	GGCGCGGAGCAGACAGGAAGGAAGCCAGGCAGGAAGGCGAGCTGCCTCTGCGTGTGTACGCGCGGGTGTGCGTCC	54	3	y	2.3e-05	++++ + + + +++
chr19:46045026-46045565	76	CCGGAgtgtgtgtccgtgtgtgcgcgtgtgcgtgtgcgtgtctgtgcgctcccgccgccctccccgccgccgccc	101	3	y	4.4e-08	+++++ +++++ +++
chr19:46045026-46045565	376	GCTCTTAAAAAACGAGACGGAGGCAGAGACCCCGGCGAGGGCGGGCGCCGGGGAGCGGGAGGAGGCGAAGCCTCA	388	2	y	1.2e-05	+++ + +++++++
chr19:46045026-46045565	451	CGCTCGGCGTCCGTCCTCCGGGTGCGCGGGGTTGGGAGCGTGGCTGAGCGGGAGCGGGGATTGGGGGAGGCGGAG CCTGGGTGGGTAGT	516	2	y	1.1e-05	++++++ +++ + ++
chr7:113377974-113378301	226	ttggaaaagggtggggcatgtccccagaatagttagggggaggaagagggatgagaatgacctaaattcatgtgt	264	2	y	7.8e-06	+++++ +++++ + +
chr7:113377974-113378301	301	gaaattacaaaataaataaataaataa	310	1	n	7.9e-07	+++ +++ +++ +++
chr17:46153506-46153774	151	GAGCTCTTGGCCCCTCCCACTTAGGCGACCCAGTCGTCCCCTGGGGCTGGGGATGCCTTCATTTTTttttttttt ttttctcagcaatagtttccagcacccaccccgcccccaaccc	212	1	y	3.7e-09	+++++++++++++++
chr4:138154152-138154297	76	cacgcagctagagcactgaaacataaaataaataaGGTTTTTGGTTTTTTTTTTTTAAGCTAACATTTTT	116	1	y	8.2e-08	++ +++++++++++
chr10:127621846-127622327	1	TCAGGGATGGAGCCCACCTTAGTACCCGCCCAGCCCTGCTCGCCTGGCACGGGGCGCAGGAGAGGCAGGCTCTGG	55	2	y	5e-05	+ + +++++++++
chr10:127621846-127622327	151	ATTTTTTTTTTGTTTGTTTGTTTTGTTTTTGATACCTTCTGACTGGCCTCCCACCAAGTCAGGGTTTCAGATGCC	155	1	y	1.5e-08	+++++++++++++++
chr5:108065526-108065888	226	GAAGTGGTCTGTGTTTGAGGCCGGTGTGAGCACGCACATTCTCCTTCCTAACCCTCGTCCCCAAGGAACTCGGTG TGTGTGTGCGTGTGCGCAGGGCTCCCGCTGGGGCGGGTGCCCAGGGAGTGCCCGGACTCGCG	298	3	y	3.9e-09	+++++++++++ +++
chr5:21785126-21785406	226	tgttttggtttttgttttgtttttttgtttgttttttCACGTGAGAGCAAGACGG	245	1	y	1.5e-08	+++++++++++++++
chr5:72559298-72559972	376	CCAGGGACTACAACTCCCAGAAGCCTCCGCCCGCGGACCGCAGAATGCGTGGCAGCGAGGCAGCttttttttttt tttttttttttCCCGGAAGAGACGAAGGAATGCTCAGTGCGCATGCGCGGTCGTTCGCGGCCTTTGGGGAACTAC	440	1	y	3.7e-09	+++++++++++++++
chr6:134614918-134615640	76	GCTGAGTTaaaaaaaaaaaaaaaaaaaaaaaaaaaagaaCCAGAGGCTATTGCTTGGAAACCAGCTAAGCAAATA	84	1	n	3.7e-09	+++++++++++++++
chr6:134614918-134615640	76	GCTGAGTTaaaaaaaaaaaaaaaaaaaaaaaaaaaagaaCCAGAGGCTATTGCTTGGAAACCAGCTAAGCAAATA	100	1	n	8.2e-08	++++++++++++ ++
chr6:134614918-134615640	301	CTGTAAATATTAGTCAGCTGGTTACAGGAAATAAAATTCCTTCAGAAACAAACCACCGAACAGATATTTACATTT	346	1	n	5.8e-05	++++++++ + ++
chr13:58157593-58158936	676	GAGTAACTCGGTGGTGGAGTGTTTGATTGTCGTGCCGGgtgtgtgtgtgtgtgtgtgtgtgtgtgtgtgtgtTCA	714	3	y	7.7e-10	+++++++++++++++
chr13:58157593-58158936	676	GAGTAACTCGGTGGTGGAGTGTTTGATTGTCGTGCCGGgtgtgtgtgtgtgtgtgtgtgtgtgtgtgtgtgtTCA	730	3	y	7.7e-10	+++++++++++++++
[truncated: 787 more rows]

## Sheet: MAST_MNX1_ATAC_UniqSeq
Chromosome	Start	End	Width	Strand	Combined p-value of all motif matches within region	E-value
chr17	35258360	35259421	1062	*	9.08e-15	1.2e-10
chr7	80778497	80779695	1199	*	5.6e-13	7.7e-09
chr17	3083181	3084407	1227	*	9.66e-13	1.3e-08
chr10	80141361	80142517	1157	*	1.98e-11	2.7e-07
chr11	70680052	70680316	265	*	2.66e-11	3.6e-07
chr6	134928512	134928936	425	*	4.36e-11	6e-07
chr7	97747218	97748902	1685	*	7.67e-11	1.1e-06
chr8	70506393	70506931	539	*	1.01e-10	1.4e-06
chr5	66075075	66075529	455	*	1.5e-10	2.1e-06
chr13	34874309	34875980	1672	*	2e-10	2.7e-06
chr2	153345521	153345948	428	*	2.01e-10	2.8e-06
chr2	93822502	93823881	1380	*	2.9e-10	4e-06
chr1	133896041	133896622	582	*	4.22e-10	5.8e-06
chr15	8443767	8445676	1910	*	4.92e-10	6.7e-06
chr17	35235781	35236707	927	*	5.33e-10	7.3e-06
chr13	111796641	111797356	716	*	5.6e-10	7.7e-06
chr5	134313582	134315135	1554	*	7.48e-10	1e-05
chr10	77970674	77971458	785	*	1.02e-09	1.4e-05
chr11	69894776	69895693	918	*	1.22e-09	1.7e-05
chr9	110423077	110424561	1485	*	1.27e-09	1.7e-05
chr7	19876567	19877112	546	*	1.3e-09	1.8e-05
chr11	69681907	69683085	1179	*	1.46e-09	2e-05
chr8	117475100	117476156	1057	*	1.54e-09	2.1e-05
chr10	40257675	40259004	1330	*	1.66e-09	2.3e-05
chr15	6554914	6555801	888	*	2.29e-09	3.1e-05
chr6	21949336	21950224	889	*	2.62e-09	3.6e-05
chr15	75085541	75087081	1541	*	3.09e-09	4.2e-05
chr10	115170710	115171763	1054	*	3.41e-09	4.7e-05
chr6	87541280	87542310	1031	*	4.65e-09	6.4e-05
chr7	28953881	28954051	171	*	7.32e-09	0.0001
chr6	38533515	38535042	1528	*	7.35e-09	0.0001
chr19	28011445	28011821	377	*	7.64e-09	0.0001
chr11	87755407	87756811	1405	*	7.83e-09	0.00011
chrX	152307507	152308284	778	*	9.65e-09	0.00013
chr8	33897902	33898102	201	*	1.13e-08	0.00016
chr7	127208605	127209424	820	*	1.29e-08	0.00018
chr11	87426737	87427248	512	*	1.48e-08	0.0002
chr13	21830228	21832182	1955	*	1.77e-08	0.00024
chr12	76369481	76370719	1239	*	1.91e-08	0.00026
chr13	101694117	101694411	295	*	1.94e-08	0.00027
chr11	98788943	98789248	306	*	2.05e-08	0.00028
chr1	153424478	153425291	814	*	2.1e-08	0.00029
chr1	86440637	86441753	1117	*	2.17e-08	0.0003
chr8	85036706	85037110	405	*	2.29e-08	0.00031
chr16	44139005	44140861	1857	*	2.4e-08	0.00033
chr11	98942224	98942427	204	*	2.84e-08	0.00039
chr10	96333418	96333628	211	*	3.13e-08	0.00043
chr4	134773121	134773349	229	*	3.13e-08	0.00043
chr12	98746249	98747361	1113	*	3.37e-08	0.00046
chr11	120938151	120939191	1041	*	3.4e-08	0.00047
chr7	118740125	118740868	744	*	3.97e-08	0.00054
chr8	126666513	126666903	391	*	4.4e-08	0.0006
chr12	86800947	86801638	692	*	4.41e-08	0.0006
chr2	75792504	75792920	417	*	4.49e-08	0.00062
chr10	127135703	127136833	1131	*	4.67e-08	0.00064
chr2	167775201	167775625	425	*	5.21e-08	0.00071
chr4	121196401	121197327	927	*	5.63e-08	0.00077
chr13	111940922	111941138	217	*	5.72e-08	0.00078
chr12	86795937	86796228	292	*	6.08e-08	0.00083
chr9	65580058	65581322	1265	*	8.56e-08	0.0012
chr14	47418221	47418529	309	*	9.03e-08	0.0012
chr15	38601614	38602430	817	*	9.24e-08	0.0013
chr2	4652066	4652356	291	*	9.51e-08	0.0013
chr7	118115851	118116448	598	*	1.02e-07	0.0014
chr10	80701870	80702816	947	*	1.02e-07	0.0014
chr9	96399645	96399903	259	*	1.05e-07	0.0014
chr8	84285877	84286067	191	*	1.06e-07	0.0015
chr10	80900741	80901210	470	*	1.07e-07	0.0015
chr7	19003006	19004179	1174	*	1.12e-07	0.0015
chr19	5488070	5491554	3485	*	1.16e-07	0.0016
chrX	48343473	48343890	418	*	1.16e-07	0.0016
chr7	16399906	16401301	1396	*	1.17e-07	0.0016
chr10	81605236	81606390	1155	*	1.2e-07	0.0016
chr7	64011915	64012119	205	*	1.3e-07	0.0018
chr4	135313959	135314201	243	*	1.4e-07	0.0019
chr11	19925602	19926303	702	*	1.54e-07	0.0021
chr11	116534011	116534575	565	*	1.79e-07	0.0025
chr5	149052971	149053340	370	*	2.04e-07	0.0028
chr2	32137913	32138345	433	*	2.05e-07	0.0028
chr1	120099662	120099899	238	*	2.07e-07	0.0028
chr5	129955978	129956189	212	*	2.08e-07	0.0029
chr5	137569774	137571049	1276	*	2.09e-07	0.0029
chr5	130256792	130257119	328	*	2.2e-07	0.003
chr11	74546396	74547702	1307	*	2.24e-07	0.0031
chr9	65133990	65134109	120	*	2.33e-07	0.0032
chr2	22811036	22811804	769	*	2.38e-07	0.0033
chr5	33033275	33034431	1157	*	2.38e-07	0.0033
chr2	84656048	84656248	201	*	2.39e-07	0.0033
chr2	163838246	163838426	181	*	2.46e-07	0.0034
chr10	30763290	30763621	332	*	2.59e-07	0.0035
chr1	33669759	33670499	741	*	2.64e-07	0.0036
chrX	48454187	48454553	367	*	2.93e-07	0.004
chr2	57117691	57117897	207	*	2.99e-07	0.0041
chr2	153108541	153109216	676	*	3.04e-07	0.0042
chr10	127641920	127643169	1250	*	3.05e-07	0.0042
chr9	110449048	110449253	206	*	3.11e-07	0.0043
chr7	68129125	68130242	1118	*	3.15e-07	0.0043
chr5	124059857	124060013	157	*	3.36e-07	0.0046
chr19	10949241	10949544	304	*	3.51e-07	0.0048
chr5	140617014	140618183	1170	*	3.59e-07	0.0049
chr15	102224689	102225456	768	*	3.6e-07	0.0049
chr19	46618359	46618641	283	*	3.71e-07	0.0051
chr10	61452743	61453131	389	*	3.77e-07	0.0052
chr8	25847733	25848608	876	*	3.8e-07	0.0052
chr11	70646918	70647454	537	*	3.84e-07	0.0053
chr5	120503574	120503839	266	*	3.89e-07	0.0053
chr13	110384718	110384924	207	*	4.21e-07	0.0058
chr11	114965588	114965821	234	*	4.26e-07	0.0058
chr1	131126099	131126648	550	*	4.31e-07	0.0059
chr1	37890196	37890704	509	*	4.34e-07	0.0059
chr5	125484024	125485361	1338	*	4.36e-07	0.006
chr9	103230327	103230694	368	*	4.4e-07	0.006
chr17	72918154	72918846	693	*	4.46e-07	0.0061
chr2	6436245	6436445	201	*	4.57e-07	0.0063
chr17	57275492	57275751	260	*	4.77e-07	0.0065
chr6	31563941	31564181	241	*	4.87e-07	0.0067
chr1	93668830	93669085	256	*	4.96e-07	0.0068
chr5	123149782	123150011	230	*	4.96e-07	0.0068
chr10	17796159	17796376	218	*	5.16e-07	0.0071
chr18	39489902	39491811	1910	*	5.32e-07	0.0073
chr2	167368504	167368766	263	*	5.35e-07	0.0073
chr1	193130222	193130523	302	*	5.35e-07	0.0073
chrX	37126720	37126890	171	*	5.52e-07	0.0076
chr11	102316723	102317054	332	*	5.6e-07	0.0077
chr16	75909215	75909415	201	*	5.73e-07	0.0078
chr10	91242622	91242852	231	*	5.88e-07	0.0081
chr11	106999308	106999864	557	*	6.06e-07	0.0083
chr19	23273849	23274118	270	*	6.17e-07	0.0085
chr3	98339907	98340066	160	*	6.46e-07	0.0089
chr12	4843244	4843520	277	*	6.49e-07	0.0089
chr10	39731418	39732280	863	*	6.67e-07	0.0091
chr7	97361638	97361824	187	*	6.82e-07	0.0094
chr5	138187146	138188096	951	*	6.95e-07	0.0095
chr17	28736558	28736899	342	*	6.95e-07	0.0095
chr10	127070302	127070512	211	*	7.28e-07	0.01
chr2	72979023	72980729	1707	*	7.5e-07	0.01
chr4	45949250	45949432	183	*	7.57e-07	0.01
chr11	50415960	50416174	215	*	7.58e-07	0.01
chr4	123083034	123083213	180	*	7.88e-07	0.011
chr19	61265424	61266853	1430	*	8.16e-07	0.011
chrX	20931541	20932308	768	*	8.22e-07	0.011
chr6	124903690	124903930	241	*	8.32e-07	0.011
chr4	130297291	130297555	265	*	8.41e-07	0.012
chr17	33394347	33394874	528	*	8.63e-07	0.012
chr1	164135470	164136171	702	*	8.69e-07	0.012
chr12	85339126	85340256	1131	*	8.82e-07	0.012
chr11	48787901	48788210	310	*	8.94e-07	0.012
chr11	97041376	97041744	369	*	9.04e-07	0.012
chr11	103017018	103017335	318	*	9.91e-07	0.014
chr5	135934413	135935238	826	*	1.01e-06	0.014
chr11	43426174	43426456	283	*	1.02e-06	0.014
chr10	14705311	14705768	458	*	1.02e-06	0.014
chr4	132178788	132178941	154	*	1.23e-06	0.017
chr3	87885573	87886046	474	*	1.3e-06	0.018
chr2	167680046	167680291	246	*	1.38e-06	0.019
chr8	72136861	72137014	154	*	1.44e-06	0.02
chr18	73815376	73816698	1323	*	1.48e-06	0.02
chr5	112325390	112326503	1114	*	1.52e-06	0.021
chr5	105110277	105110477	201	*	1.6e-06	0.022
chr11	3184727	3186097	1371	*	1.63e-06	0.022
chr4	41124265	41124616	352	*	1.67e-06	0.023
chr19	12501637	12502355	719	*	1.67e-06	0.023
chr9	35305283	35305666	384	*	1.68e-06	0.023
chr8	122712035	122712376	342	*	1.7e-06	0.023
chr2	168154509	168154888	380	*	1.72e-06	0.024
chr8	85025509	85027055	1547	*	1.73e-06	0.024
chr4	32768179	32768413	235	*	1.75e-06	0.024
chr17	25222191	25222523	333	*	1.76e-06	0.024
chr8	115276417	115276662	246	*	1.77e-06	0.024
chr17	48299332	48301186	1855	*	1.78e-06	0.024
chr9	14500428	14500745	318	*	1.8e-06	0.025
chr15	99416602	99416847	246	*	1.8e-06	0.025
chr17	34912105	34912441	337	*	1.81e-06	0.025
chr3	104818238	104818759	522	*	1.82e-06	0.025
chr12	80112921	80113298	378	*	1.86e-06	0.025
chr7	128392376	128393082	707	*	1.9e-06	0.026
chr2	127302045	127302240	196	*	1.93e-06	0.026
chr10	80374255	80374455	201	*	1.95e-06	0.027
chr11	60417001	60417432	432	*	1.97e-06	0.027
chr17	43016426	43017697	1272	*	2.04e-06	0.028
chr11	86995770	86995970	201	*	2.07e-06	0.028
chrX	101332509	101333033	525	*	2.08e-06	0.029
chr7	13054305	13054923	619	*	2.1e-06	0.029
chr5	125273760	125273938	179	*	2.14e-06	0.029
chr1	133039590	133039795	206	*	2.18e-06	0.03
chr3	131303147	131303400	254	*	2.18e-06	0.03
chr9	15279700	15280153	454	*	2.2e-06	0.03
chr9	22468158	22468571	414	*	2.3e-06	0.032
chr1	131555310	131555512	203	*	2.34e-06	0.032
chr12	108894127	108894463	337	*	2.44e-06	0.033
chr6	17743491	17743691	201	*	2.45e-06	0.034
chr19	6858238	6858365	128	*	2.48e-06	0.034
chr16	34050298	34050494	197	*	2.54e-06	0.035
chr7	75782060	75782383	324	*	2.58e-06	0.035
chr1	143731063	143731252	190	*	2.64e-06	0.036
chr3	89227528	89228465	938	*	2.65e-06	0.036
chr7	25395675	25396197	523	*	2.65e-06	0.036
chr1	63114285	63114890	606	*	2.71e-06	0.037
chr8	57801446	57801623	178	*	2.74e-06	0.038
chr7	58399163	58399419	257	*	2.74e-06	0.038
chr10	93160562	93160804	243	*	2.75e-06	0.038
chr11	95413767	95414893	1127	*	2.76e-06	0.038
chr2	158174695	158175753	1059	*	2.78e-06	0.038
chr4	130913231	130914310	1080	*	2.79e-06	0.038
chr10	127563974	127564541	568	*	2.79e-06	0.038
chr10	4432261	4432673	413	*	2.8e-06	0.038
chr4	117210517	117210752	236	*	2.87e-06	0.039
chr11	69605825	69606168	344	*	2.92e-06	0.04
chr19	4397026	4397609	584	*	2.95e-06	0.04
chr7	127228789	127229231	443	*	3e-06	0.041
chr8	70797052	70797667	616	*	3.06e-06	0.042
chr8	18595026	18595692	667	*	3.11e-06	0.043
chr10	117215942	117216434	493	*	3.13e-06	0.043
chr4	132463890	132464159	270	*	3.13e-06	0.043
chr1	153414272	153415180	909	*	3.14e-06	0.043
chr4	108459939	108460903	965	*	3.31e-06	0.045
chr10	121033546	121034109	564	*	3.37e-06	0.046
chr16	8637314	8637855	542	*	3.48e-06	0.048
chr13	55429384	55429722	339	*	3.48e-06	0.048
chr2	78868598	78869366	769	*	3.51e-06	0.048
chr7	30394546	30394828	283	*	3.58e-06	0.049
chr4	132514993	132515828	836	*	3.59e-06	0.049
chr9	50616967	50617531	565	*	3.61e-06	0.049
chr5	24393571	24394880	1310	*	3.67e-06	0.05
chr16	32202745	32203085	341	*	3.69e-06	0.051
chr3	131474569	131474958	390	*	3.74e-06	0.051
chr18	73762456	73762670	215	*	3.78e-06	0.052
chr10	128549092	128549391	300	*	3.8e-06	0.052
chrX	142681123	142681860	738	*	3.83e-06	0.052
chr13	41381612	41382170	559	*	3.86e-06	0.053
chr6	83054397	83054868	472	*	3.86e-06	0.053
chr11	82890580	82890829	250	*	3.92e-06	0.054
chr6	47739863	47740057	195	*	4.03e-06	0.055
chr11	5485388	5485628	241	*	4.17e-06	0.057
chr11	69948212	69949209	998	*	4.25e-06	0.058
chr6	118139060	118139446	387	*	4.35e-06	0.06
chr11	4096597	4096992	396	*	4.37e-06	0.06
chr17	46031938	46032988	1051	*	4.37e-06	0.06
chr5	121545913	121546804	892	*	4.41e-06	0.06
chr4	46554643	46555006	364	*	4.55e-06	0.062
chr2	158146426	158146645	220	*	4.61e-06	0.063
chr4	59928526	59928694	169	*	4.64e-06	0.064
chr11	100472716	100473024	309	*	4.65e-06	0.064
chr14	7913964	7914246	283	*	4.67e-06	0.064
chr9	61681111	61681295	185	*	4.74e-06	0.065
chr15	102399719	102400146	428	*	5.04e-06	0.069
chr5	100674271	100675305	1035	*	5.09e-06	0.07
chr2	170319310	170319510	201	*	5.09e-06	0.07
chr16	13671820	13672849	1030	*	5.15e-06	0.071
chr3	116423941	116425267	1327	*	5.16e-06	0.071
chr8	84976338	84980235	3898	*	5.18e-06	0.071
chr16	91522693	91523191	499	*	5.22e-06	0.071
chr7	28981774	28982226	453	*	5.26e-06	0.072
chr8	116732727	116733036	310	*	5.3e-06	0.073
chr16	22548231	22548561	331	*	5.4e-06	0.074
chr2	167004643	167004830	188	*	5.45e-06	0.075
chr2	167081785	167082017	233	*	5.51e-06	0.075
chr17	87446721	87447397	677	*	5.56e-06	0.076
chr1	37691338	37691548	211	*	5.61e-06	0.077
chrX	36989489	36989811	323	*	5.65e-06	0.077
chr16	91869691	91870398	708	*	5.89e-06	0.081
chr8	120538724	120539026	303	*	5.89e-06	0.081
chr15	77970753	77971282	530	*	5.9e-06	0.081
chr10	95180308	95181254	947	*	6.07e-06	0.083
chr17	28697445	28697638	194	*	6.09e-06	0.083
chr11	116198719	116199247	529	*	6.09e-06	0.084
chr10	80172903	80173320	418	*	6.11e-06	0.084
chr7	30955980	30957706	1727	*	6.14e-06	0.084
chr15	35938093	35938328	236	*	6.17e-06	0.085
chr2	10142866	10143110	245	*	6.2e-06	0.085
chr17	24859194	24860417	1224	*	6.33e-06	0.087
chr12	108179303	108179883	581	*	6.43e-06	0.088
chr2	84715097	84715872	776	*	6.43e-06	0.088
chr2	153600645	153601288	644	*	6.57e-06	0.09
chr7	99534935	99536481	1547	*	6.66e-06	0.091
chr12	31997030	31997273	244	*	6.68e-06	0.092
chr5	134965691	134966585	895	*	6.74e-06	0.092
chr3	137864197	137865868	1672	*	6.93e-06	0.095
chr19	60226397	60226875	479	*	6.98e-06	0.096
chr6	47748455	47748661	207	*	7.06e-06	0.097
chr4	88550320	88550560	241	*	7.11e-06	0.097
chr16	44358063	44358265	203	*	7.13e-06	0.098
chrX	136741303	136742163	861	*	7.16e-06	0.098
chr17	46857251	46857794	544	*	7.17e-06	0.098
chr17	87571742	87571942	201	*	7.25e-06	0.099
chr12	91588356	91588697	342	*	7.35e-06	0.1
chr5	123093448	123094433	986	*	7.36e-06	0.1
chr14	21813011	21813553	543	*	7.49e-06	0.1
chr17	24617684	24618257	574	*	7.51e-06	0.1
chr19	53273503	53273801	299	*	7.52e-06	0.1
chr11	82952166	82952926	761	*	7.61e-06	0.1
chr5	140731241	140731420	180	*	7.68e-06	0.11
chr7	44572482	44572745	264	*	7.72e-06	0.11
chr15	79658040	79659354	1315	*	8e-06	0.11
chr18	36734910	36735261	352	*	8.01e-06	0.11
chr12	100110089	100110402	314	*	8.02e-06	0.11
chr7	19736676	19736760	85	*	8.1e-06	0.11
chr14	72709774	72710187	414	*	8.13e-06	0.11
chr9	75409765	75410387	623	*	8.18e-06	0.11
chr1	132390420	132390611	192	*	8.2e-06	0.11
chr6	116228964	116229164	201	*	8.23e-06	0.11
chrX	159627232	159627705	474	*	8.49e-06	0.12
chr8	57652096	57652969	874	*	8.55e-06	0.12
chr7	80947496	80948008	513	*	8.57e-06	0.12
chr2	26351995	26352260	266	*	8.67e-06	0.12
chr1	132355968	132356208	241	*	8.8e-06	0.12
chr1	182124612	182125396	785	*	8.92e-06	0.12
chr3	22143429	22143594	166	*	8.94e-06	0.12
chr10	41303076	41304066	991	*	8.96e-06	0.12
chr11	95336656	95337216	561	*	8.98e-06	0.12
chr5	110810086	110810454	369	*	9.07e-06	0.12
chr2	172401186	172401434	249	*	9.19e-06	0.13
chr4	49631709	49632169	461	*	9.3e-06	0.13
chr6	83395715	83396194	480	*	9.55e-06	0.13
chr13	3537695	3538254	560	*	9.8e-06	0.13
chr9	71166167	71167359	1193	*	9.85e-06	0.13
chr7	16294896	16295793	898	*	9.99e-06	0.14
chr11	49243800	49244559	760	*	1.01e-05	0.14
chr12	17000005	17000574	570	*	1.01e-05	0.14
chr3	103129527	103130397	871	*	1.04e-05	0.14
chr7	24081759	24082418	660	*	1.04e-05	0.14
chr19	45047504	45048222	719	*	1.04e-05	0.14
chr15	79062838	79063322	485	*	1.05e-05	0.14
chr14	69805363	69805844	482	*	1.05e-05	0.14
chr3	51728537	51728732	196	*	1.06e-05	0.15
chr13	52550957	52551607	651	*	1.06e-05	0.15
chr13	3406783	3406980	198	*	1.07e-05	0.15
chr2	73485342	73486590	1249	*	1.07e-05	0.15
chr7	127110807	127111819	1013	*	1.07e-05	0.15
chr4	135353076	135353833	758	*	1.09e-05	0.15
chr14	70159446	70159940	495	*	1.09e-05	0.15
chr4	98923106	98923714	609	*	1.1e-05	0.15
chr19	46502903	46504150	1248	*	1.1e-05	0.15
chr17	86167484	86167737	254	*	1.12e-05	0.15
chr13	22015909	22016135	227	*	1.12e-05	0.15
chr5	115134715	115135171	457	*	1.13e-05	0.16
chr3	51559772	51560950	1179	*	1.13e-05	0.16
chr17	47535817	47536338	522	*	1.13e-05	0.16
chr11	61266845	61267552	708	*	1.14e-05	0.16
chr4	134478180	134478378	199	*	1.14e-05	0.16
chr7	144914775	144915345	571	*	1.15e-05	0.16
chr12	101958146	101958510	365	*	1.16e-05	0.16
chr2	155538434	155538634	201	*	1.17e-05	0.16
chr10	95773680	95773973	294	*	1.19e-05	0.16
chr11	53628015	53628215	201	*	1.2e-05	0.16
chr7	100863206	100863743	538	*	1.21e-05	0.17
chr19	24280206	24281243	1038	*	1.22e-05	0.17
chr7	46710475	46710908	434	*	1.23e-05	0.17
chr3	54807732	54808124	393	*	1.24e-05	0.17
chr1	131658092	131658451	360	*	1.24e-05	0.17
chr8	47673708	47675543	1836	*	1.26e-05	0.17
chr11	32542762	32543111	350	*	1.27e-05	0.17
chr8	121108145	121108586	442	*	1.27e-05	0.17
chr6	125445636	125445836	201	*	1.29e-05	0.18
chr15	84430659	84430868	210	*	1.31e-05	0.18
chr4	135433751	135434308	558	*	1.32e-05	0.18
chr1	152902615	152903438	824	*	1.32e-05	0.18
chr6	57743504	57743684	181	*	1.33e-05	0.18
chr16	20302290	20302681	392	*	1.34e-05	0.18
chr6	113483212	113483558	347	*	1.35e-05	0.18
chr11	97435002	97436251	1250	*	1.37e-05	0.19
chr11	8589688	8589913	226	*	1.38e-05	0.19
chr11	116018191	116018509	319	*	1.4e-05	0.19
chr9	21367485	21368025	541	*	1.4e-05	0.19
chr18	5334293	5335086	794	*	1.42e-05	0.2
chr1	172500153	172502013	1861	*	1.44e-05	0.2
chr1	191417315	191417475	161	*	1.48e-05	0.2
chr12	3309621	3310321	701	*	1.49e-05	0.2
chr2	120353073	120353290	218	*	1.5e-05	0.21
chr3	87960988	87961250	263	*	1.56e-05	0.21
chr6	22356015	22356427	413	*	1.57e-05	0.22
chr1	161766831	161767546	716	*	1.58e-05	0.22
chr14	61681083	61682716	1634	*	1.59e-05	0.22
chr2	26594199	26594390	192	*	1.59e-05	0.22
chr12	51865846	51866698	853	*	1.6e-05	0.22
chr19	23135237	23136026	790	*	1.62e-05	0.22
chr5	145204052	145204678	627	*	1.62e-05	0.22
chr18	39666462	39666607	146	*	1.63e-05	0.22
chr12	86833783	86834143	361	*	1.63e-05	0.22
chr6	128843162	128843391	230	*	1.64e-05	0.22
chr8	83740101	83741364	1264	*	1.67e-05	0.23
chr9	44986386	44986816	431	*	1.69e-05	0.23
chr17	35134932	35135677	746	*	1.7e-05	0.23
chr11	70654023	70655198	1176	*	1.72e-05	0.24
chr15	79347466	79348243	778	*	1.74e-05	0.24
chr10	70096794	70097233	440	*	1.76e-05	0.24
chr5	32135063	32136020	958	*	1.76e-05	0.24
chr6	91683805	91684245	441	*	1.77e-05	0.24
chr7	102258270	102258470	201	*	1.82e-05	0.25
chr4	33467074	33467255	182	*	1.82e-05	0.25
chr11	69015979	69016249	271	*	1.84e-05	0.25
chr12	3781611	3781861	251	*	1.86e-05	0.26
chr12	85818642	85818810	169	*	1.88e-05	0.26
chr1	171102110	171102899	790	*	1.88e-05	0.26
chrX	102157077	102157357	281	*	1.88e-05	0.26
chr6	86487394	86487826	433	*	1.89e-05	0.26
chrY	90744368	90744879	512	*	1.93e-05	0.26
chr5	86085139	86085366	228	*	1.93e-05	0.26
chr12	108757934	108758348	415	*	1.98e-05	0.27
chr2	32189453	32189602	150	*	2.02e-05	0.28
chr7	97081497	97082683	1187	*	2.02e-05	0.28
chr4	12087883	12088079	197	*	2.03e-05	0.28
chr7	30419637	30420478	842	*	2.03e-05	0.28
chr5	124862462	124862843	382	*	2.03e-05	0.28
chr7	47007983	47008735	753	*	2.04e-05	0.28
chr15	78982712	78983162	451	*	2.06e-05	0.28
chr10	4787108	4787308	201	*	2.07e-05	0.28
chr11	60811170	60811498	329	*	2.08e-05	0.29
chr3	59120676	59120852	177	*	2.13e-05	0.29
chr8	33731762	33732172	411	*	2.14e-05	0.29
chr7	63911030	63912151	1122	*	2.23e-05	0.31
chr15	9071064	9071444	381	*	2.24e-05	0.31
chr15	80088784	80089005	222	*	2.24e-05	0.31
chr9	14275104	14276433	1330	*	2.26e-05	0.31
chr10	12997252	12997429	178	*	2.27e-05	0.31
chr2	31239399	31239520	122	*	2.27e-05	0.31
chr10	80539026	80539482	457	*	2.29e-05	0.31
chr7	122021018	122021365	348	*	2.42e-05	0.33
chr17	23193187	23193412	226	*	2.44e-05	0.33
chr14	61648744	61649102	359	*	2.48e-05	0.34
chr2	165982598	165983383	786	*	2.49e-05	0.34
chr11	103132800	103133380	581	*	2.49e-05	0.34
chr11	88047276	88047915	640	*	2.5e-05	0.34
chr17	57247682	57249601	1920	*	2.52e-05	0.35
chr3	65929468	65929829	362	*	2.55e-05	0.35
chr3	51518481	51518845	365	*	2.59e-05	0.35
chr18	53744552	53744970	419	*	2.61e-05	0.36
chr15	59728239	59728544	306	*	2.63e-05	0.36
chr16	84834805	84835304	500	*	2.63e-05	0.36
chr11	88067964	88068836	873	*	2.64e-05	0.36
chr10	45584424	45584638	215	*	2.65e-05	0.36
chr17	56897772	56898002	231	*	2.81e-05	0.39
chr9	64736704	64738021	1318	*	2.82e-05	0.39
chr15	73512243	73512751	509	*	2.85e-05	0.39
chr4	44756255	44756898	644	*	2.96e-05	0.41
chr13	13889589	13889864	276	*	2.97e-05	0.41
chr17	33968680	33969247	568	*	2.99e-05	0.41
chr4	136021639	136022060	422	*	2.99e-05	0.41
chr8	111300130	111300575	446	*	3.01e-05	0.41
chr4	101265032	101265541	510	*	3.02e-05	0.41
chr5	142905750	142906919	1170	*	3.02e-05	0.41
chr1	120121016	120121345	330	*	3.04e-05	0.42
chr2	136890951	136892294	1344	*	3.04e-05	0.42
chr17	45433529	45433992	464	*	3.16e-05	0.43
chr15	76639619	76640236	618	*	3.18e-05	0.44
chr8	11557947	11558545	599	*	3.24e-05	0.44
chr3	36000401	36000870	470	*	3.26e-05	0.45
chr15	78581634	78582244	611	*	3.28e-05	0.45
chr5	110107606	110108468	863	*	3.3e-05	0.45
chr17	55952635	55952835	201	*	3.3e-05	0.45
chr11	69921221	69921900	680	*	3.39e-05	0.46
chr3	90692232	90692594	363	*	3.4e-05	0.47
chr11	94989831	94991122	1292	*	3.41e-05	0.47
chr7	25205498	25206131	634	*	3.43e-05	0.47
chr11	106787654	106789455	1802	*	3.43e-05	0.47
chr7	25754783	25756326	1544	*	3.57e-05	0.49
chr8	11635174	11636613	1440	*	3.58e-05	0.49
chr5	122264394	122264728	335	*	3.61e-05	0.5
chr17	45572559	45574118	1560	*	3.64e-05	0.5
chr4	127061054	127061355	302	*	3.66e-05	0.5
chr10	99106829	99108290	1462	*	3.69e-05	0.51
chr10	53629392	53630346	955	*	3.69e-05	0.51
chrX	42148982	42149368	387	*	3.71e-05	0.51
chr5	146963719	146963947	229	*	3.72e-05	0.51
chr10	128211767	128212006	240	*	3.76e-05	0.52
chr11	77981749	77982801	1053	*	3.77e-05	0.52
chr5	114773471	114774889	1419	*	3.83e-05	0.53
chr2	168955316	168955759	444	*	3.85e-05	0.53
chr12	32123098	32123878	781	*	3.89e-05	0.53
chr10	78185102	78185425	324	*	3.96e-05	0.54
chr5	139449185	139449451	267	*	3.96e-05	0.54
chr7	27689251	27689688	438	*	4.04e-05	0.55
chr9	64253531	64253976	446	*	4.07e-05	0.56
chr6	128438638	128438956	319	*	4.08e-05	0.56
chr17	84180936	84181780	845	*	4.1e-05	0.56
chrY	90740149	90741654	1506	*	4.15e-05	0.57
chr6	120822443	120822967	525	*	4.16e-05	0.57
chr1	179803474	179804118	645	*	4.17e-05	0.57
chr1	9748286	9748754	469	*	4.18e-05	0.57
chrX	145505195	145506196	1002	*	4.19e-05	0.57
chr18	60848895	60849221	327	*	4.21e-05	0.58
chr7	45896670	45897185	516	*	4.22e-05	0.58
chrX	42068088	42068750	663	*	4.3e-05	0.59
chr15	102671012	102671384	373	*	4.32e-05	0.59
chr16	4879825	4880875	1051	*	4.32e-05	0.59
chr14	101608970	101609344	375	*	4.35e-05	0.6
chr13	52981143	52981462	320	*	4.37e-05	0.6
chr4	117835190	117836817	1628	*	4.37e-05	0.6
chr5	125270769	125271918	1150	*	4.37e-05	0.6
chr16	94526433	94527158	726	*	4.41e-05	0.6
chr3	88509842	88510309	468	*	4.42e-05	0.61
chr19	8713004	8714010	1007	*	4.43e-05	0.61
chrX	73914913	73915331	419	*	4.47e-05	0.61
chr13	5845294	5845989	696	*	4.48e-05	0.61
chr2	167043483	167043753	271	*	4.5e-05	0.62
chr16	75766779	75767145	367	*	4.51e-05	0.62
chr9	101034527	101035091	565	*	4.7e-05	0.64
chr4	129189539	129190059	521	*	4.73e-05	0.65
chr16	3122992	3123171	180	*	4.89e-05	0.67
chr7	102065113	102065652	540	*	4.91e-05	0.67
chr7	106529174	106529381	208	*	4.92e-05	0.67
chr11	80383167	80383485	319	*	4.96e-05	0.68
chr5	64780838	64781061	224	*	5e-05	0.68
chr2	32757101	32757885	785	*	5.02e-05	0.69
chr1	118388918	118389528	611	*	5.02e-05	0.69
chr4	144892317	144892916	600	*	5.11e-05	0.7
chr9	53610181	53610581	401	*	5.12e-05	0.7
chr2	3658014	3658309	296	*	5.18e-05	0.71
chr1	13589763	13590201	439	*	5.21e-05	0.71
chr4	11485784	11486174	391	*	5.22e-05	0.72
chr19	8722983	8723599	617	*	5.23e-05	0.72
chrX	77795893	77796195	303	*	5.26e-05	0.72
chr4	43656441	43656936	496	*	5.47e-05	0.75
chr6	125039638	125039942	305	*	5.58e-05	0.76
chr1	64078843	64079173	331	*	5.59e-05	0.77
chr10	80684363	80684575	213	*	5.63e-05	0.77
chr10	112002340	112002906	567	*	5.68e-05	0.78
chr3	65392516	65392882	367	*	5.73e-05	0.79
chr1	16104393	16105962	1570	*	5.75e-05	0.79
chr4	134853336	134854215	880	*	5.78e-05	0.79
chr5	140749236	140749916	681	*	5.8e-05	0.8
chr8	120596161	120596299	139	*	5.8e-05	0.8
chr17	15084319	15084569	251	*	5.81e-05	0.8
chr14	65102629	65102829	201	*	5.95e-05	0.82
chr5	138622755	138623017	263	*	5.96e-05	0.82
chr15	59648149	59648837	689	*	5.99e-05	0.82
chr6	119848102	119848608	507	*	6.03e-05	0.83
chr12	71051152	71051352	201	*	6.05e-05	0.83
chr19	46045026	46045565	540	*	6.09e-05	0.83
chr7	113377974	113378301	328	*	6.1e-05	0.84
chr17	46153506	46153774	269	*	6.22e-05	0.85
chr4	138154152	138154297	146	*	6.27e-05	0.86
chr10	127621846	127622327	482	*	6.31e-05	0.87
chr5	108065526	108065888	363	*	6.36e-05	0.87
chr5	21785126	21785406	281	*	6.41e-05	0.88
chr5	72559298	72559972	675	*	6.42e-05	0.88
chr6	134614918	134615640	723	*	6.43e-05	0.88
chr13	58157593	58158936	1344	*	6.46e-05	0.89
chr10	52382010	52382424	415	*	6.47e-05	0.89
chr10	128094753	128094978	226	*	6.54e-05	0.9
chr16	50432141	50432589	449	*	6.59e-05	0.9
chr11	51565192	51565416	225	*	6.67e-05	0.91
chr6	115808700	115809196	497	*	6.71e-05	0.92
chr16	8644007	8644197	191	*	6.75e-05	0.93
chr4	116626784	116627667	884	*	6.85e-05	0.94
chr7	66109260	66109627	368	*	6.89e-05	0.94
chr3	95133946	95134168	223	*	6.91e-05	0.95
chr12	81594992	81595383	392	*	6.97e-05	0.96
chrX	48284673	48285778	1106	*	6.98e-05	0.96
chr4	132732433	132732792	360	*	7.01e-05	0.96
chr4	155761026	155761384	359	*	7.15e-05	0.98
chr17	88123847	88124039	193	*	7.22e-05	0.99
chr11	87404277	87404770	494	*	7.31e-05	1
chr10	116581373	116582189	817	*	7.47e-05	1
chr10	117710082	117711027	946	*	7.58e-05	1
chr8	94541375	94541650	276	*	7.72e-05	1.1
chr7	90129467	90130432	966	*	7.78e-05	1.1
chr8	46739533	46739884	352	*	7.81e-05	1.1
chr3	153912747	153913283	537	*	7.86e-05	1.1
chr7	19308259	19308841	583	*	7.93e-05	1.1
chr8	119926624	119926824	201	*	7.94e-05	1.1
chr2	174295418	174295660	243	*	7.95e-05	1.1
chrX	17572222	17572515	294	*	8.04e-05	1.1
chr2	32487304	32487467	164	*	8.07e-05	1.1
chr5	113771637	113772915	1279	*	8.22e-05	1.1
chr10	63382773	63383042	270	*	8.26e-05	1.1
chr13	21169932	21170142	211	*	8.28e-05	1.1
chr1	135259227	135259416	190	*	8.3e-05	1.1
chr11	53300322	53300840	519	*	8.35e-05	1.1
chr12	70234551	70235421	871	*	8.37e-05	1.1
chr16	42875126	42876005	880	*	8.64e-05	1.2
chr2	156179565	156180600	1036	*	8.68e-05	1.2
chr11	101627680	101628287	608	*	8.7e-05	1.2
chr2	33908461	33908737	277	*	8.75e-05	1.2
chr9	108578612	108578985	374	*	8.84e-05	1.2
chrX	7947769	7948263	495	*	8.92e-05	1.2
chr17	71204485	71204655	171	*	9.24e-05	1.3
chr17	30612458	30612874	417	*	9.26e-05	1.3
chr2	5379242	5379498	257	*	9.3e-05	1.3
chr5	139803870	139804606	737	*	9.35e-05	1.3
chr3	51415877	51416161	285	*	9.4e-05	1.3
chr2	30928366	30929933	1568	*	9.41e-05	1.3
chr10	93070676	93070941	266	*	9.53e-05	1.3
chr18	39020990	39021207	218	*	9.54e-05	1.3
chr14	55559912	55561022	1111	*	9.58e-05	1.3
chr14	16364970	16365879	910	*	9.64e-05	1.3
chr2	30415450	30416232	783	*	9.71e-05	1.3
chr4	148151698	148152242	545	*	9.96e-05	1.4
chr11	49846509	49846998	490	*	0.000101	1.4
chr1	193201508	193201805	298	*	0.000101	1.4
chr11	97629732	97629932	201	*	0.000102	1.4
chr1	135753049	135753348	300	*	0.000102	1.4
chr17	83732274	83733136	863	*	0.000104	1.4
chr15	36517933	36518164	232	*	0.000106	1.4
chr10	26799684	26799944	261	*	0.000106	1.4
chr11	57812328	57812647	320	*	0.000107	1.5
chr6	32851092	32851286	195	*	0.000108	1.5
chr2	180257113	180257582	470	*	0.000111	1.5
chr2	158361447	158361720	274	*	0.000111	1.5
chr12	70968198	70968842	645	*	0.000111	1.5
chr16	17911302	17911597	296	*	0.000115	1.6
chr7	16387617	16388000	384	*	0.000116	1.6
chr2	20969284	20969878	595	*	0.000117	1.6
chr1	75236330	75237031	702	*	0.000117	1.6
chr5	34643180	34643380	201	*	0.000118	1.6
chr18	5688695	5688902	208	*	0.000121	1.7
chr11	115412822	115413676	855	*	0.000122	1.7
chr11	75966745	75967361	617	*	0.000124	1.7
chr13	65240596	65241547	952	*	0.000124	1.7
chr17	74294770	74295556	787	*	0.000127	1.7
chr13	55021505	55021702	198	*	0.000127	1.7
chr6	131387313	131388665	1353	*	0.000128	1.8
chr8	26169273	26169496	224	*	0.000129	1.8
chr13	51816026	51816267	242	*	0.000133	1.8
chr9	66980621	66980821	201	*	0.000133	1.8
chr8	121751569	121751794	226	*	0.000135	1.8
chr5	115484386	115484602	217	*	0.000136	1.9
chr11	68967808	68968258	451	*	0.000138	1.9
chr12	73053915	73054199	285	*	0.000139	1.9
chr5	90366175	90366776	602	*	0.000142	1.9
chr11	59163332	59164001	670	*	0.000142	1.9
chr10	43424661	43424935	275	*	0.000145	2
chr10	11280775	11281500	726	*	0.000146	2
chr14	51883805	51885013	1209	*	0.000148	2
chrX	106011741	106012073	333	*	0.000148	2
chr19	40588376	40589568	1193	*	0.000149	2
chr3	103914267	103914702	436	*	0.000152	2.1
chr6	49236461	49236680	220	*	0.000153	2.1
chr17	56584484	56585127	644	*	0.000155	2.1
chr19	53185657	53185854	198	*	0.000156	2.1
chr9	119352218	119352423	206	*	0.000162	2.2
chr4	143412650	143412944	295	*	0.000164	2.2
chr1	79761704	79761913	210	*	0.000166	2.3
chr5	146260994	146261400	407	*	0.000167	2.3
chr11	53805937	53806085	149	*	0.000167	2.3
chr11	78697403	78697775	373	*	0.000168	2.3
chr10	99460130	99460386	257	*	0.000168	2.3
chr11	79704414	79704775	362	*	0.00017	2.3
chr15	83483637	83483769	133	*	0.000173	2.4
chr6	38345951	38346172	222	*	0.000174	2.4
chr4	141994184	141994514	331	*	0.000179	2.5
chr1	135282712	135284206	1495	*	0.000181	2.5
chr8	107436367	107437369	1003	*	0.000181	2.5
chr9	45955207	45955466	260	*	0.000183	2.5
chr16	56064487	56064788	302	*	0.000187	2.6
chr14	54554176	54554856	681	*	0.00019	2.6
chr11	24076409	24078127	1719	*	0.000191	2.6
chr11	53737190	53737927	738	*	0.000192	2.6
chr5	64960896	64961291	396	*	0.000193	2.6
chr4	44233979	44234388	410	*	0.000194	2.7
chr9	106821740	106822675	936	*	0.000194	2.7
chr7	45715189	45716348	1160	*	0.000195	2.7
chr15	79741391	79742732	1342	*	0.000198	2.7
chr1	191085179	191085849	671	*	0.000198	2.7
chr14	26579466	26580082	617	*	0.000199	2.7
chr5	123572908	123573285	378	*	0.0002	2.7
chr12	8640766	8641286	521	*	0.000203	2.8
chr1	58711612	58712897	1286	*	0.000204	2.8
chr2	58157173	58157324	152	*	0.00021	2.9
chr1	135132559	135132794	236	*	0.000211	2.9
chr18	32542470	32542848	379	*	0.000211	2.9
chr12	52503613	52504011	399	*	0.000213	2.9
chr19	46369381	46369557	177	*	0.000217	3
chr17	5440227	5440734	508	*	0.000218	3
chr13	58188596	58188775	180	*	0.000218	3
chr19	61199517	61199845	329	*	0.000219	3
chr5	110269663	110270058	396	*	0.00022	3
chr9	54734467	54734793	327	*	0.000222	3
chr4	88438956	88440063	1108	*	0.000224	3.1
chr3	94974596	94975149	554	*	0.000226	3.1
chr11	3123609	3124282	674	*	0.000227	3.1
chr11	114668448	114669235	788	*	0.000231	3.2
chr19	8819402	8820400	999	*	0.000231	3.2
chr6	47650829	47651414	586	*	0.000235	3.2
chr5	35728983	35729495	513	*	0.000236	3.2
chr11	101658017	101658878	862	*	0.000238	3.3
chr4	116557047	116557884	838	*	0.000239	3.3
chr1	20820311	20820621	311	*	0.000241	3.3
chr7	16296918	16297118	201	*	0.000244	3.3
chr13	91541042	91541375	334	*	0.000244	3.3
chrX	51018026	51019019	994	*	0.000245	3.4
chr6	88724500	88724669	170	*	0.000245	3.4
chr9	65196089	65196813	725	*	0.000245	3.4
chr2	118658594	118660141	1548	*	0.000247	3.4
chr1	166002607	166003580	974	*	0.000247	3.4
chr11	40692455	40692891	437	*	0.00025	3.4
chr10	81167697	81168114	418	*	0.00025	3.4
chr2	19388892	19389151	260	*	0.000253	3.5
chr11	6006378	6006652	275	*	0.000255	3.5
chr12	33314216	33315571	1356	*	0.000259	3.5
chr11	94236156	94236434	279	*	0.00026	3.6
chr8	120608073	120608273	201	*	0.000261	3.6
chr9	108516910	108517751	842	*	0.000262	3.6
chr8	119437049	119437244	196	*	0.000264	3.6
chr15	83375277	83375487	211	*	0.000269	3.7
chrX	41911867	41912148	282	*	0.000271	3.7
chr8	84730861	84731088	228	*	0.000278	3.8
chr1	53851044	53851706	663	*	0.000282	3.9
chr13	92483492	92484188	697	*	0.00029	4
chr4	136285408	136286228	821	*	0.000291	4
chr2	90679093	90679575	483	*	0.000291	4
chr11	121204168	121204622	455	*	0.000296	4.1
chr11	35834431	35834775	345	*	0.000296	4.1
chr16	90044072	90044372	301	*	0.000297	4.1
chr1	136415186	136415786	601	*	0.000297	4.1
chr5	122354180	122354621	442	*	0.000298	4.1
chr5	4104421	4104977	557	*	0.000299	4.1
chr1	160044378	160044725	348	*	0.000301	4.1
chr18	84087488	84088331	844	*	0.000302	4.1
chr16	43699059	43699252	194	*	0.000306	4.2
chr14	52190861	52191021	161	*	0.000308	4.2
chr5	148399306	148400110	805	*	0.000309	4.2
chr14	47354215	47354484	270	*	0.00031	4.2
chr14	31251119	31251646	528	*	0.000313	4.3
chrX	50612314	50612544	231	*	0.000316	4.3
chr11	69366549	69366772	224	*	0.000318	4.4
chr4	154160653	154160991	339	*	0.000325	4.5
chr17	53689226	53689887	662	*	0.000327	4.5
chr1	171150383	171150826	444	*	0.00033	4.5
chr7	24316592	24316924	333	*	0.000332	4.6
chr10	5805477	5806266	790	*	0.000332	4.6
chr3	69004494	69006202	1709	*	0.000337	4.6
chr4	108301019	108301432	414	*	0.000339	4.6
chr3	94582280	94582935	656	*	0.000344	4.7
chr3	146521156	146521664	509	*	0.000344	4.7
chr16	48993796	48994344	549	*	0.000348	4.8
chr5	32458788	32459277	490	*	0.000353	4.8
chr2	128396091	128396248	158	*	0.000355	4.9
chr15	102246463	102247190	728	*	0.000357	4.9
chr10	79746549	79746837	289	*	0.000357	4.9
chr7	34985815	34986027	213	*	0.000358	4.9
chr4	135898490	135899256	767	*	0.000362	5
chr5	107875095	107875258	164	*	0.000363	5
chr2	30093643	30094025	383	*	0.000365	5
chr2	122377420	122378148	729	*	0.000367	5
chr5	138171058	138172221	1164	*	0.000368	5
chrX	101222283	101222815	533	*	0.000369	5.1
chr4	154928574	154929640	1067	*	0.000374	5.1
chr6	134897845	134898565	721	*	0.000376	5.2
chr17	55959012	55959605	594	*	0.000377	5.2
chr1	143710449	143710638	190	*	0.000379	5.2
chr9	85327159	85327574	416	*	0.000381	5.2
chr1	72284286	72284527	242	*	0.000382	5.2
chr11	89100603	89100850	248	*	0.000385	5.3
chr1	179517554	179518226	673	*	0.000385	5.3
chr5	139736302	139736655	354	*	0.000386	5.3
chr5	124492884	124493830	947	*	0.000388	5.3
chr15	76871169	76871476	308	*	0.000395	5.4
chr9	109985572	109985772	201	*	0.000401	5.5
chr6	34922070	34922296	227	*	0.000401	5.5
chr10	43578997	43579403	407	*	0.000402	5.5
chr10	17722366	17723720	1355	*	0.000404	5.5
chr6	115037808	115038103	296	*	0.00041	5.6
chr19	6084759	6085834	1076	*	0.00041	5.6
chr17	10319421	10320284	864	*	0.000415	5.7
chr18	35553306	35553579	274	*	0.000415	5.7
chr3	108571540	108571907	368	*	0.000418	5.7
chr3	105801277	105801613	337	*	0.000418	5.7
chr19	4294490	4294858	369	*	0.000418	5.7
chr14	19823767	19824094	328	*	0.000421	5.8
chr11	69040235	69040557	323	*	0.000426	5.8
chr19	8786141	8786575	435	*	0.000436	6
chr11	94548939	94549454	516	*	0.000442	6.1
chr2	181917461	181917659	199	*	0.000449	6.2
chr9	123924301	123925654	1354	*	0.000451	6.2
chr6	42264695	42265196	502	*	0.000457	6.3
chr3	116006838	116007671	834	*	0.000466	6.4
chr2	29787640	29788441	802	*	0.000466	6.4
chr3	41742392	41742777	386	*	0.000468	6.4
chr18	70472077	70472706	630	*	0.000472	6.5
chr4	46636192	46636401	210	*	0.000475	6.5
chr5	151687029	151687187	159	*	0.000476	6.5
chr18	53861911	53862248	338	*	0.000478	6.5
chr2	117120450	117120916	467	*	0.000484	6.6
chr9	106532008	106532201	194	*	0.000485	6.6
chr16	91728608	91729480	873	*	0.000487	6.7
chr11	86757442	86758269	828	*	0.00049	6.7
chr9	65524083	65524292	210	*	0.000495	6.8
chr9	104262860	104263345	486	*	0.0005	6.9
chr11	95834294	95835486	1193	*	0.000502	6.9
chrX	7648736	7649258	523	*	0.000504	6.9
chr14	31018986	31019582	597	*	0.000504	6.9
chr9	105495066	105495344	279	*	0.000505	6.9
chr8	71405906	71407002	1097	*	0.000505	6.9
chr3	142881965	142882614	650	*	0.000505	6.9
chr5	118478402	118478619	218	*	0.000514	7
chr6	11907399	11907932	534	*	0.000516	7.1
chr6	149309354	149309839	486	*	0.000521	7.1
chr2	32982025	32982380	356	*	0.000521	7.1
chr13	106936806	106937191	386	*	0.000525	7.2
chr2	26964279	26964675	397	*	0.000536	7.3
chr11	53707265	53707561	297	*	0.000542	7.4
chr11	50377249	50378644	1396	*	0.000542	7.4
chr8	84202678	84204305	1628	*	0.00055	7.5
chr6	100833519	100833782	264	*	0.000556	7.6
chr8	60632638	60632893	256	*	0.000561	7.7
chr15	85653794	85654159	366	*	0.000563	7.7
chr12	69158881	69159416	536	*	0.000565	7.7
chr8	94703626	94704309	684	*	0.00057	7.8
chr2	5714431	5715077	647	*	0.000575	7.9
chr13	8780629	8780802	174	*	0.000575	7.9
chr3	108554586	108555007	422	*	0.000576	7.9
chr9	79793282	79793741	460	*	0.000577	7.9
chr1	64482197	64482431	235	*	0.000578	7.9
chr4	155734509	155734951	443	*	0.00058	7.9
chr8	71463697	71465067	1371	*	0.000588	8.1
chr14	53795338	53795533	196	*	0.000591	8.1
chr4	117473505	117474297	793	*	0.000592	8.1
chr10	79097573	79097843	271	*	0.000595	8.2
chr12	79321062	79321256	195	*	0.000595	8.2
chr9	101073638	101074236	599	*	0.000602	8.2
chr8	70776632	70777399	768	*	0.000603	8.3
chr13	67081275	67081685	411	*	0.000604	8.3
chr4	132269830	132270341	512	*	0.000605	8.3
chr1	171699177	171699377	201	*	0.000606	8.3
chr4	155669150	155669710	561	*	0.000609	8.3
chr1	180903009	180904440	1432	*	0.00061	8.4
chr6	88731357	88731484	128	*	0.000612	8.4
chr5	125503868	125504075	208	*	0.000617	8.5
chr5	146230977	146231377	401	*	0.000622	8.5
chr7	16615084	16615657	574	*	0.000625	8.6
chr2	167698113	167698255	143	*	0.000632	8.7
chr3	129901323	129901630	308	*	0.000636	8.7
chr1	84839336	84840023	688	*	0.000638	8.7
chr9	57765076	57766180	1105	*	0.000641	8.8
chr5	140418994	140419479	486	*	0.000644	8.8
chr18	35919647	35919902	256	*	0.000644	8.8
chr17	83705762	83705929	168	*	0.000647	8.9
chr2	71873033	71873458	426	*	0.000649	8.9
chr9	22259831	22260119	289	*	0.000661	9.1
chr11	79287614	79287689	76	*	0.000673	9.2
chr7	24817648	24817894	247	*	0.0007	9.6
chr5	123394431	123394941	511	*	0.000712	9.8
chr7	144523503	144523772	270	*	0.000716	9.8
chr3	95357149	95357452	304	*	0.000719	9.9
chr13	14612979	14613442	464	*	0.000721	9.9
chr1	39936547	39936869	323	*	0.000722	9.9
chr10	41473079	41474037	959	*	0.000724	9.9
chr8	27023595	27024027	433	*	0.000725	9.9
chr4	133650165	133650420	256	*	0.000726	9.9
chr5	113841994	113842233	240	*	0.000727	10

## Sheet: MAST_MNX1_H3K4me1
Region	Start position of subregion relative to sequnces length	Sequence of subregion of containg motif match	Start position of motif match relative to sequnces length	Motif Index	Reverse complement	P-value	Match pattern
chr5:145197000-145198000	1	ggcgcatgcctttaatcccagcactcaggaggcagaggcaggcggatttctgagttcaaggccagcctggtctac	28	2	y	4.3e-10	+++++++++++++++
chr5:145197000-145198000	76	aaagtgagttccaggacagccagggccacacagagaaaccctgtctcgaaaaaacaaaaACAAAAACAACAACTA	127	1	n	5.1e-08	+++++++++ +++++
chr5:145197000-145198000	151	CAACCAAAAGTTATTTTTTTTTTTTTTTTttttggtttttcgagacagggtttctctgtatagccctggctgtcc	164	1	y	3.7e-09	+++++++++++++++
chr5:145197000-145198000	226	tggagctcactttgtagaccaggctggcctcgaactcagaaatacgcctgcctctgcctcccgagtgctgggatt	272	2	n	4.3e-10	+++++++++++++++
chr5:145197000-145198000	376	agcactctgaaggccaaggcagggagatctctgagtccaaacagcctgggctacatagtaacttccagaccagga	384	2	y	1.3e-06	+ ++++ +++++++
chr5:145197000-145198000	451	gagttacagtgagaccctgtctcaaaaacacaaCAAAAATTATTAGAAACAAACATATGTACACAAAATAAAATA	474	1	n	1.3e-06	+++++ ++++ ++++
chr5:145197000-145198000	451	gagttacagtgagaccctgtctcaaaaacacaaCAAAAATTATTAGAAACAAACATATGTACACAAAATAAAATA	500	3	n	7.5e-06	++ +++ + ++++
chr5:145197000-145198000	901	tgtagtaagagaaaacttctttccacaagtttgtcttttgatctccacacaagcacagtggcacatgtacacaca cacacacacaAGACAAATAAAGTTA	970	3	n	7.7e-10	+++++++++++++++
chr11:50412000-50414000	76	cctgagccatctccccGAATGCGAGGCAGAGTTTTAATCtttatttattttattgcatgtatgtacatttcctgc	115	1	y	2.4e-06	+++ +++ ++++ ++
chr11:50412000-50414000	376	ttttaaaaattaatttattaatttttctttatttGttttgttttttaaaagctggggtctctttgttctgtatct	407	1	y	6.1e-07	+++ ++++ ++++++
chr11:50412000-50414000	451	cttgtctgccttgctatgtagaccaggatggtcccgaactcacagagatccatctgcctcttcctcgcaagtgct	503	2	n	5e-06	++++++++ ++++
chr11:50412000-50414000	526	gggattaaaggcatgcaccaccacacccagcCTAGATTTATTCttttttttttttttttttttttttttgagaca	569	1	y	3.7e-09	+++++++++++++++
chr11:50412000-50414000	601	gggcttctctgtatagtcctggctgtcctggaactcactctgtagaccaggctggcctcgaactcagaaatccgc ctgcctctgcctccggagtgctgggattaaaggcgtgcatcaccacgcccggctAGATTTACTCtttatgtgtat	675	2	n	4.3e-10	+++++++++++++++
chr11:50412000-50414000	1051	ATTTTAAATCACTTAAGCATCAACTCAGTCTCCCCACAACTGGAGAAGTAGATCACTTCACTGTTGTTTTTTTtt tctttttttcgagaaaaggtttctctgtatagccctggctgtcctgaaactcactctgtagaccaggctggcctc	1118	1	y	1.6e-07	+++++++++ +++++
chr11:50412000-50414000	1201	gaactcagaaatccacctgcctctgcctccggagtgctgggattaaaggtgtgcactaccatgcccagctCACTT	1216	2	n	4.3e-10	+++++++++++++++
chr11:50412000-50414000	1276	CACTATTAATGCTCTAGTCAAGCATACATACCAGGAACTCGAGCATATGCACGTACATCATCCCTCACTCAACCT	1294	3	n	7.7e-05	++ ++ +++ ++
chr11:50412000-50414000	1351	tgtgtgtgtgtgtgtgtgtgtgtgtgtgtgtgtgtgtgtgtgtgtgtgtgtgtgAGAGATGCGGCTGAAATCTAG	1352	3	y	7.7e-10	+++++++++++++++
chr11:50412000-50414000	1351	tgtgtgtgtgtgtgtgtgtgtgtgtgtgtgtgtgtgtgtgtgtgtgtgtgtgtgAGAGATGCGGCTGAAATCTAG	1368	3	y	7.7e-10	+++++++++++++++
chr11:50412000-50414000	1351	tgtgtgtgtgtgtgtgtgtgtgtgtgtgtgtgtgtgtgtgtgtgtgtgtgtgtgAGAGATGCGGCTGAAATCTAG	1384	3	y	7.7e-10	+++++++++++++++
chr11:50412000-50414000	1426	GGCTTCTCTGAATCACAACCCCAGACTTCCTCCCCCTCCCCCTAAATTTAAGACTTCATTTTAGGCCATGCTTgt	1454	2	n	2.2e-05	+++ ++ ++ ++ +
chr11:50412000-50414000	1501	ggctcacacctttaaccccaagactggagaagcaaaggctgatgtgtctttgtgagttccaggctccgcaccagc	1528	2	y	2.2e-05	++ +++ ++++ +
chr11:50412000-50414000	1576	caaggactacatagtcagactctgtttttttttttttttttttttttttaatttattatatgtaagtacactgta	1600	1	y	3.7e-09	+++++++++++++++
chr11:50412000-50414000	1576	caaggactacatagtcagactctgtttttttttttttttttttttttttaatttattatatgtaagtacactgta	1615	1	y	8.7e-07	++++++++++ +++
chr11:50412000-50414000	1801	TTAATGCACACACGCGCACACACACCTATTCACgtgtgtgtgtgtgtgtgtgtgtgtgtgtgtgtgCCCgcccat	1807	3	n	3.6e-08	+++++++ + +++++
chr11:50412000-50414000	1801	TTAATGCACACACGCGCACACACACCTATTCACgtgtgtgtgtgtgtgtgtgtgtgtgtgtgtgtgCCCgcccat	1834	3	y	7.7e-10	+++++++++++++++
chr11:50412000-50414000	1801	TTAATGCACACACGCGCACACACACCTATTCACgtgtgtgtgtgtgtgtgtgtgtgtgtgtgtgtgCCCgcccat	1850	3	y	7.7e-10	+++++++++++++++
chr15:100642000-100644000	376	TCTCTGAGCTCTCCTCTTTAAAAAAAAAAAAAAGGAAAATAAGATTTTGAAGGAGTCATGGCTTGCAGGCCAGAA	394	1	n	3e-07	++++++++++++++
chr15:100642000-100644000	676	GGTCTATCtgtgtgtgtgtgtgtgtgtgtgtgtgcgcgtgtagccagaagagggtttcagtgtgtgtgtgtgtgt	685	3	y	7.7e-10	+++++++++++++++
chr15:100642000-100644000	676	GGTCTATCtgtgtgtgtgtgtgtgtgtgtgtgtgcgcgtgtagccagaagagggtttcagtgtgtgtgtgtgtgt	701	3	y	1.4e-07	+++++++++ + +++
chr15:100642000-100644000	676	GGTCTATCtgtgtgtgtgtgtgtgtgtgtgtgtgcgcgtgtagccagaagagggtttcagtgtgtgtgtgtgtgt	735	3	y	7.7e-10	+++++++++++++++
chr15:100642000-100644000	751	gtgtgtgtgtgtgtgtgtgcgcgtgtAGCCAGAAGAGGGTTTCTGTGTGtgtgtgtgtgtgtgtgtgcgtgtagc	751	3	y	7.7e-10	+++++++++++++++
chr15:100642000-100644000	751	gtgtgtgtgtgtgtgtgtgcgcgtgtAGCCAGAAGAGGGTTTCTGTGTGtgtgtgtgtgtgtgtgtgcgtgtagc	795	3	y	7.7e-10	+++++++++++++++
chr15:100642000-100644000	826	cagaagagggtttcagtgtgtgtgtgtgtgtgtgtgtgtagccagaagagagtttcagatgtctgcctctatcaa	841	3	y	7.7e-10	+++++++++++++++
chr15:100642000-100644000	1051	AAAGCAAGTACTTTCTTTTTTTTTTTTTttttggttttttgagacagggtttctctgtgtagccctggctgtcct	1066	1	y	3.7e-09	+++++++++++++++
chr15:100642000-100644000	1126	ggaactcactctgtagaccaggctggcctcgaactcaaaaatccgcctgcctctgcctcccaagtgctgggatta	1171	2	n	4.3e-10	+++++++++++++++
chr15:100642000-100644000	1351	aaccatctgtaactacagttccaggggatccactgccctctctggcaccaggcacacacaaacatggtgcacaga cacaaatgcaggcaaaacacttacatacataaaataaaaaaaaaTAAATAGAAAAAGCAATAACTTTAATAAATT	1403	3	n	8.5e-05	++++++++ +++
chr15:100642000-100644000	1351	aaccatctgtaactacagttccaggggatccactgccctctctggcaccaggcacacacaaacatggtgcacaga cacaaatgcaggcaaaacacttacatacataaaataaaaaaaaaTAAATAGAAAAAGCAATAACTTTAATAAATT	1420	3	n	2.3e-05	++++ +++++ + +
chr15:100642000-100644000	1351	aaccatctgtaactacagttccaggggatccactgccctctctggcaccaggcacacacaaacatggtgcacaga cacaaatgcaggcaaaacacttacatacataaaataaaaaaaaaTAAATAGAAAAAGCAATAACTTTAATAAATT	1458	1	n	2.1e-06	++ +++++++++ ++
chr15:100642000-100644000	1651	cgtgtgcaccaacacacactcaCGTGCACAGAGAATAAAGAAGTATGTCTAAGAACCAACAGGATAAGGCAGGAG	1665	3	n	7e-06	+++++ +++ +++
chr15:100642000-100644000	1651	cgtgtgcaccaacacacactcaCGTGCACAGAGAATAAAGAAGTATGTCTAAGAACCAACAGGATAAGGCAGGAG	1709	2	y	5.3e-05	+++ +++++++
chr15:100642000-100644000	1726	agccgggagtagaggtgcatacctgtgaccccaggacttgggaggcagaggcaggtgagtttcctatgggtttct	1766	2	y	4.3e-10	+++++++++++++++
chr15:100642000-100644000	1876	cctgtgaagaaaacaaaGCCAATAAAAAATATTCTAAACACTCCTAGATTAAAAAAAAAAAAGGCGCCCAGGGGT	1923	1	n	1.5e-05	+ ++++++++++++
chr19:37446000-37448000	1	tatatatgtgtgtgtgtgtgtgtgtgtgtgtgtgtgtgtgtgtgtgtgtctgcatgtatctatgtatgtgtgttt	8	3	y	7.7e-10	+++++++++++++++
chr19:37446000-37448000	1	tatatatgtgtgtgtgtgtgtgtgtgtgtgtgtgtgtgtgtgtgtgtgtctgcatgtatctatgtatgtgtgttt	24	3	y	7.7e-10	+++++++++++++++
chr19:37446000-37448000	1	tatatatgtgtgtgtgtgtgtgtgtgtgtgtgtgtgtgtgtgtgtgtgtctgcatgtatctatgtatgtgtgttt	42	3	y	2.7e-07	++++++++ ++ ++
chr19:37446000-37448000	1	tatatatgtgtgtgtgtgtgtgtgtgtgtgtgtgtgtgtgtgtgtgtgtctgcatgtatctatgtatgtgtgttt	58	3	y	1.3e-05	+ + +++ ++++++
chr19:37446000-37448000	76	ttatgtctgtatgagtgtctatgtatgtgtgtgtgtctatgtgtctgtgtctgtgtgtgtctgtgtctatgtatg tgtgtctgtatgtctctgtgtgtgtctatgtgtctatgtgtgtgtgtctgtaaccctggctggctacagagatga	96	3	y	2.4e-08	+++ ++++++++++
chr19:37446000-37448000	76	ttatgtctgtatgagtgtctatgtatgtgtgtgtgtctatgtgtctgtgtctgtgtgtgtctgtgtctatgtatg tgtgtctgtatgtctctgtgtgtgtctatgtgtctatgtgtgtgtgtctgtaaccctggctggctacagagatga	116	3	y	1e-06	++++ +++++ ++++
chr19:37446000-37448000	76	ttatgtctgtatgagtgtctatgtatgtgtgtgtgtctatgtgtctgtgtctgtgtgtgtctgtgtctatgtatg tgtgtctgtatgtctctgtgtgtgtctatgtgtctatgtgtgtgtgtctgtaaccctggctggctacagagatga	148	3	y	3e-07	+++++++ +++ ++
chr19:37446000-37448000	76	ttatgtctgtatgagtgtctatgtatgtgtgtgtgtctatgtgtctgtgtctgtgtgtgtctgtgtctatgtatg tgtgtctgtatgtctctgtgtgtgtctatgtgtctatgtgtgtgtgtctgtaaccctggctggctacagagatga	180	3	y	3.2e-07	++++ + ++++++++
chr19:37446000-37448000	301	tttaactgagttatttgttctctgtctctttgctgatattcactgagagccctggtttttatctgttttattcag	358	1	y	2.6e-05	+++ + ++++++ ++
chr19:37446000-37448000	526	ctctcctggaactcactatgtagaccaggctggcctcaaactcacagatatccatctgcctctgcctctcaagtg	580	2	n	1.4e-08	+++++++++++++
chr19:37446000-37448000	826	TTGTTCATCTGTTTCTTCccctccctccctccctccctccctccctcccttcctccctccctccctccctccctt	839	2	n	7.3e-06	++ ++ ++ +++++
chr19:37446000-37448000	826	TTGTTCATCTGTTTCTTCccctccctccctccctccctccctccctcccttcctccctccctccctccctccctt	857	2	n	6.9e-05	+++ ++++ + +
chr19:37446000-37448000	826	TTGTTCATCTGTTTCTTCccctccctccctccctccctccctccctcccttcctccctccctccctccctccctt	877	2	n	6.9e-05	+++ ++++ + +
chr19:37446000-37448000	901	ccttccctccctccctcccCACCCCCAACGGggtctgagacttgatcacaggtagcccaggatgatcttgaactg	906	2	n	2.5e-05	+++ ++++ + ++
chr19:37446000-37448000	976	ctagtccacttgtctttgcctgcacctgggttacaggtatgaaccaccCTCtttttttttttttttttttttttt ttggtttttcgagacagggtttctctgtgttgccctggctgtcctggaactcaccttgtagaccaggctggcctc	984	2	n	1.2e-05	+ ++ ++ +++++ +
chr19:37446000-37448000	976	ctagtccacttgtctttgcctgcacctgggttacaggtatgaaccaccCTCtttttttttttttttttttttttt ttggtttttcgagacagggtttctctgtgttgccctggctgtcctggaactcaccttgtagaccaggctggcctc	1027	1	y	3.7e-09	+++++++++++++++
chr19:37446000-37448000	976	ctagtccacttgtctttgcctgcacctgggttacaggtatgaaccaccCTCtttttttttttttttttttttttt ttggtttttcgagacagggtttctctgtgttgccctggctgtcctggaactcaccttgtagaccaggctggcctc	1043	1	y	9.1e-08	++++++++++ ++++
chr19:37446000-37448000	1126	gaactcagaaatccacctgcctctgcctcccgagtgctgggattaaaggtgtgcgccactacgcccagcCATATG	1141	2	n	4.3e-10	+++++++++++++++
chr19:37446000-37448000	1276	ATTTGTTTATTCGTTTGCCTTAATGCATGTCTATAATTAAAATGTGGAGATGGGAAATGCTTGTGGATGTAGCAT	1277	1	y	6.2e-06	+++ +++ ++ ++++
chr19:37446000-37448000	1801	ctcacagagattcacctgcctcggcttccttagtcctCCTGCACACTTTTAGGACTAGATTCCCTGCATTTTGCT	1815	2	n	8.3e-08	++++++++ ++ +++
chr19:37446000-37448000	1876	CATTTTGTGTaatataatgatttccggttgtatccatcttcttgcaaattcatgttttttttttctttctttaca	1924	1	y	1.6e-06	++ + +++++++++
chr4:134290000-134292000	301	AAGTGTTTATGTGTATGTATGGGCACATGCACACACACACACACGAACACATTATTTTAGGATAGTTTAACAGAG	303	3	y	5.1e-07	++++ + +++++ ++
chr4:134290000-134292000	301	AAGTGTTTATGTGTATGTATGGGCACATGCACACACACACACACGAACACATTATTTTAGGATAGTTTAACAGAG	330	3	n	7.7e-10	+++++++++++++++
chr4:134290000-134292000	451	ATACATCTGTTACCTCTAGCATAAAGAAATTGACATTGCTAAAGAtggtagtatacatttaatcccagcattcag gaggcagaggcaggtaagtctcttgaatttgaggccagcctagtctacatggtgaattctaggatagctagagat	525	2	y	4.3e-10	+++++++++++++++
chr4:134290000-134292000	601	acatagttacatcctgagactttgtctcaaaaaTAATTTTAAAAAGGAGagccaggcagtggtggcacacgcctt	642	2	y	4.1e-05	+ + ++++ ++++
chr4:134290000-134292000	676	taattcccagcattggagagtcagaggcaggcagatttctgagttcgaggccagtctggtctacaaagtgagttc	692	2	y	2.6e-07	+++ ++++++++++
chr4:134290000-134292000	751	caggacatccagggttataaggaaaaacccagtcttaaaaaaaaaaaaaaaaaaaaaaaaaaggaggagaggaag aagaagaaaagaaaaGCATTTGTCttagagtcattgctgtgaagaaacaccatgaccaaggcaactcttacaaag	787	1	n	3.7e-09	+++++++++++++++
chr4:134290000-134292000	751	caggacatccagggttataaggaaaaacccagtcttaaaaaaaaaaaaaaaaaaaaaaaaaaggaggagaggaag aagaagaaaagaaaaGCATTTGTCttagagtcattgctgtgaagaaacaccatgaccaaggcaactcttacaaag	818	2	y	3.1e-05	++++ +++ + ++
chr4:134290000-134292000	1351	agctacagtgtacttacatataataaataaataaaatcttttaaaaaaaaGTTACTTTCTATAGAATCCCAACCA	1371	1	n	1.3e-05	++ +++ +++ +++
chr4:134290000-134292000	1726	TTCCTGTACTGAAACAAAAGGAAAGGGGAGCCTGGACTAAGGAGGCTGAGGCAGGAGGATGAACATAATTCAAGC	1766	2	y	8.6e-10	++++++ ++++++++
chr8:70038000-70040000	1	acaaacaaacaaacaaacaaaccaaaaacaaCCCAAAACTTAGCAAAATGTACTCTATAAACGGTGATCATGGTA	3	1	n	4e-08	+++++++++++ +++
chr8:70038000-70040000	1	acaaacaaacaaacaaacaaaccaaaaacaaCCCAAAACTTAGCAAAATGTACTCTATAAACGGTGATCATGGTA	24	1	n	5.8e-05	+++++ ++ ++++
chr8:70038000-70040000	301	tgcctagtacagttctgccttccatccttggcatccacctaaaacccatgcatatacctatagcctcagcactga gggagaagctggaacataagaattccaaggccacacctacataactcattttgaagccagcctaagatgaataat	373	2	y	3.8e-05	++++ +++ ++ ++
chr8:70038000-70040000	451	gagtccctcaaagaaacaaaCAAAAGTAAAAATTACACAATGTATCCTAACTCAGCTGTTGTGCTGTATAAGGCT	460	1	n	2.6e-06	+++ +++++++ +++
chr8:70038000-70040000	526	CAAGAATTGTATCTCTTCCTTGTGATATTTTTGTTTTTTTTTAAAAAGCAGTCAAGATAAGAACTCTTTAGTTCA	553	1	y	3.4e-08	+++++ +++++++++
chr8:70038000-70040000	676	GTGAGGTGGGGTGCAGTGTCAGGTGCTACCTGTTATTTCTGTTGACTTGGTTTTTTGTTGTTGTCACTGTTGTTG	717	1	y	4.6e-05	++ +++ ++++++
chr8:70038000-70040000	826	ggcttcatccaagtctcagatccacctgcttctgtccctaggatattaaaaatatgtgtcgggctggagagatgg	850	2	n	2.2e-06	+++++ ++++ + +
chr8:70038000-70040000	1051	aataaatcttaaaaaaaaaaGTGTCACCATCTATCTTTTGCTTTTTaaacaaatatgtgtgtgcacgcatgtgtg tgtgtatatatatatatatgtacacacacacacacacacacacacacacacacacacacacacacacatgtatat	1055	1	n	3.5e-05	++ + +++++++++
chr8:70038000-70040000	1051	aataaatcttaaaaaaaaaaGTGTCACCATCTATCTTTTGCTTTTTaaacaaatatgtgtgtgcacgcatgtgtg tgtgtatatatatatatatgtacacacacacacacacacacacacacacacacacacacacacacacatgtatat	1119	3	y	3.7e-07	+++++++++++ +
chr8:70038000-70040000	1051	aataaatcttaaaaaaaaaaGTGTCACCATCTATCTTTTGCTTTTTaaacaaatatgtgtgtgcacgcatgtgtg tgtgtatatatatatatatgtacacacacacacacacacacacacacacacacacacacacacacacatgtatat	1148	3	n	7.7e-10	+++++++++++++++
chr8:70038000-70040000	1051	aataaatcttaaaaaaaaaaGTGTCACCATCTATCTTTTGCTTTTTaaacaaatatgtgtgtgcacgcatgtgtg tgtgtatatatatatatatgtacacacacacacacacacacacacacacacacacacacacacacacatgtatat	1164	3	n	7.7e-10	+++++++++++++++
chr8:70038000-70040000	1051	aataaatcttaaaaaaaaaaGTGTCACCATCTATCTTTTGCTTTTTaaacaaatatgtgtgtgcacgcatgtgtg tgtgtatatatatatatatgtacacacacacacacacacacacacacacacacacacacacacacacatgtatat	1180	3	n	4.9e-09	++++++++++++++
chr8:70038000-70040000	1201	gatcttatccaatctgacaatttgctttgtgtgagtaggtgtgtgtgcatatgcaccggaaTGTGGAGGTTAAGC	1233	3	y	1e-05	+ ++ +++++++++
chr8:70038000-70040000	1276	ATCAGGCTCTATATTTCCCTTACTCCCTTGAGAGGAGGCAAGCTACTAGACAGCAAGGCTTAGTGCTCCACTTGT CTCTGCTCCTCAGCAGCCACTACACTGGGGTTCCCAATGGGGTCATGTGTAGGCATACTGGCCATGTCAGATCCT	1346	2	n	8.5e-06	+ ++ ++++++ +
chr8:70038000-70040000	1426	TCCCATGGACACTGGGATCTGCACTTGGACCCTCATTTTttttttttttttgagacagggtttctctgtatagcc	1461	1	y	3.7e-09	+++++++++++++++
chr8:70038000-70040000	1501	ctggctgtcctggaactcactttgtagaccaggctagcctcgaactcagaaatccgcctgcctctgcctcccgag	1557	2	n	4.3e-10	+++++++++++++++
chr1:10091000-10094000	76	GGGTTTAGttttgttttcttggggtaaggttccatctggatcaggctgcccttgaactcattatgtggtgaagaa	78	1	y	8.4e-05	+++ ++++ ++++
chr1:10091000-10094000	151	aggattaccttgaaattgtagtcatcctgtttgcttctccctcctgagggctcggaatacaggtgcactccagag	180	2	n	4.3e-06	+++ +++ +++++
chr1:10091000-10094000	301	AAttttttttgtgaatatacttattatttttatttatgtgttagtgtatctttgcacatgagtcctatggagtgt	321	1	y	1.2e-05	++ ++ +++++ +++
chr1:10091000-10094000	826	tttttgggtgtgttcttgaatttggtgttcaagtattttattaaggatttgtgtgtgtgtgtGTGTATCTGTCTG	876	3	y	7.7e-10	+++++++++++++++
chr1:10091000-10094000	1051	gcagcactcatgatgttggaacattagctgagagctatgtcctgatttgcagggttgcgggggagggagaaagaa aaagagagagagagagagagagagaggaagaggaagagagaggagagagagagtgaaagagagaagaagaagaag	1112	2	y	5.7e-05	+++++ +++ +
chr1:10091000-10094000	1051	gcagcactcatgatgttggaacattagctgagagctatgtcctgatttgcagggttgcgggggagggagaaagaa aaagagagagagagagagagagagaggaagaggaagagagaggagagagagagtgaaagagagaagaagaagaag	1138	2	y	5.4e-06	+++ ++++ +++
chr1:10091000-10094000	1051	gcagcactcatgatgttggaacattagctgagagctatgtcctgatttgcagggttgcgggggagggagaaagaa aaagagagagagagagagagagagaggaagaggaagagagaggagagagagagtgaaagagagaagaagaagaag	1154	2	y	2.4e-06	++++ ++++ +++
chr1:10091000-10094000	1201	aagaagaagaagaagaagaagaagaagaagaaagagagagagagttgcagggttggggggagggagaaagaaaac	1227	2	y	5.7e-05	+ ++ ++++ ++
chr1:10091000-10094000	1201	aagaagaagaagaagaagaagaagaagaagaaagagagagagagttgcagggttggggggagggagaaagaaaac	1259	2	y	5.7e-05	+++++ +++ +
chr1:10091000-10094000	1276	aagagagagagagaagaagaagagagaggagagagagaatgaatgagagagaagaagaagaagaagaagaagaag	1290	2	y	1.1e-05	++ + ++++ +++
chr1:10091000-10094000	1351	aagaagaagaagagagagagagagagagagagagagagagagagagaATATGAATGAATGAATATATGAgagcct	1361	2	y	1.9e-05	+++ ++++ ++
chr1:10091000-10094000	1351	aagaagaagaagagagagagagagagagagagagagagagagagagaATATGAATGAATGAATATATGAgagcct	1377	2	y	1.9e-05	+++ ++++ ++
chr1:10091000-10094000	1726	gaaagtctgctagaatcttatgctgagtctgttggctgtgggccatttttgttaggagattattatttcttctat tttgttggtagcaatgcgcctgttttaatAATTTACTTCACATTTTTTCATTTATTTCTTTAAGAATTTTCATTT	1792	1	y	8e-05	++ ++ + ++++ ++
chr1:10091000-10094000	1726	gaaagtctgctagaatcttatgctgagtctgttggctgtgggccatttttgttaggagattattatttcttctat tttgttggtagcaatgcgcctgttttaatAATTTACTTCACATTTTTTCATTTATTTCTTTAAGAATTTTCATTT	1843	1	y	1.8e-05	++++++ +++ +++
chr1:10091000-10094000	1951	cttcgtagaccaggctggtcacctgactatgctccccagagactcatctgcctctgccttctgaggactgggatG	1972	2	n	8.9e-05	++++ ++ +++ ++
chr1:10091000-10094000	1951	cttcgtagaccaggctggtcacctgactatgctccccagagactcatctgcctctgccttctgaggactgggatG	1997	2	n	4.3e-08	++++++++++++ +
chr1:10091000-10094000	2176	ctaaaggtttgctggtctggttaattttgtcaaaaaaccccaacttttcattccattgattcgtttgtttgtttg tttttctgataattttatccctgacttgatttcttttcttcttgtctattcttttgggtgttgtttgttcatgtt tttcaagGTCTCCATCTAAGATTTTTTTTttttttttttttgagacagggtttctctgtctctggctgtcctgga	2239	1	y	4e-08	+++ +++++++++++
chr1:10091000-10094000	2176	ctaaaggtttgctggtctggttaattttgtcaaaaaaccccaacttttcattccattgattcgtttgtttgtttg tttttctgataattttatccctgacttgatttcttttcttcttgtctattcttttgggtgttgtttgttcatgtt tttcaagGTCTCCATCTAAGATTTTTTTTttttttttttttgagacagggtttctctgtctctggctgtcctgga	2314	1	y	5.2e-05	+++ ++ + +++++
chr1:10091000-10094000	2176	ctaaaggtttgctggtctggttaattttgtcaaaaaaccccaacttttcattccattgattcgtttgtttgtttg tttttctgataattttatccctgacttgatttcttttcttcttgtctattcttttgggtgttgtttgttcatgtt tttcaagGTCTCCATCTAAGATTTTTTTTttttttttttttgagacagggtttctctgtctctggctgtcctgga	2347	1	y	3.7e-09	+++++++++++++++
chr1:10091000-10094000	2176	ctaaaggtttgctggtctggttaattttgtcaaaaaaccccaacttttcattccattgattcgtttgtttgtttg tttttctgataattttatccctgacttgatttcttttcttcttgtctattcttttgggtgttgtttgttcatgtt tttcaagGTCTCCATCTAAGATTTTTTTTttttttttttttgagacagggtttctctgtctctggctgtcctgga	2380	2	n	5.3e-05	+++ +++++ ++
chr1:10091000-10094000	2401	actcactttgtagaccaggctggcctcgaactcagaaatccacctgcctctgcctcccgagtggtggtaggcact	2443	2	n	4.3e-10	+++++++++++++++
chr13:48549000-48552000	1	caggacagccagggctacacagagaaactctgtcttggaaaacaaaCAAATAAACAAAAAAAAAAGATATCTGTC	48	1	n	6e-08	+++ +++++++++++
chr13:48549000-48552000	151	GAGTCACAACAGAAAAAAAAAAAAATTCCACAAGCAGAGACCTCAGGCAGAGAGGGATACTTTCCAAGGTTATCC	158	1	n	5.4e-06	++ + ++++++++++
chr13:48549000-48552000	376	agcattcaaaaaaagatcaagacgtttaatttgaaaatatctagatgtcttggttttctcagaaaaaaaaaaaaa aagggaatctctgcattcagtctgcatttcaacatgacaCTGTACTCTCCGTGCAAGCTGAACTCTCCTGCCTAC	438	1	n	3.7e-09	+++++++++++++++
chr13:48549000-48552000	676	ACCTTCACCACAGAGCTGAGAAGGTGGCACAGGCAGAGCAGTACTACAAAAGTCACTATCTAAATGAGGTCAATT	698	2	y	9.9e-06	++ ++++ ++++++
chr13:48549000-48552000	1051	tgacttctttcctccacatgtacatacataAGTGCACAAACTACATGTGCATGcacacacacaaacacgcacaca cacacacacacacacaTTCGCGCACATGGAGAATCAGAGACAAAACGCTGAGAGCGGGGGTTATGACAGAAGCCG	1073	3	n	6e-05	++ +++ + +++
chr13:48549000-48552000	1051	tgacttctttcctccacatgtacatacataAGTGCACAAACTACATGTGCATGcacacacacaaacacgcacaca cacacacacacacacaTTCGCGCACATGGAGAATCAGAGACAAAACGCTGAGAGCGGGGGTTATGACAGAAGCCG	1120	3	n	7.7e-10	+++++++++++++++
chr13:48549000-48552000	1051	tgacttctttcctccacatgtacatacataAGTGCACAAACTACATGTGCATGcacacacacaaacacgcacaca cacacacacacacacaTTCGCGCACATGGAGAATCAGAGACAAAACGCTGAGAGCGGGGGTTATGACAGAAGCCG	1136	3	n	1.8e-05	++++++ + + +++
chr13:48549000-48552000	1051	tgacttctttcctccacatgtacatacataAGTGCACAAACTACATGTGCATGcacacacacaaacacgcacaca cacacacacacacacaTTCGCGCACATGGAGAATCAGAGACAAAACGCTGAGAGCGGGGGTTATGACAGAAGCCG	1155	2	y	9.4e-05	++ +++++ ++
chr13:48549000-48552000	1201	AGTCCCTGCATTCTGGGATTCCTGAGATCACAGtgatgaaccagcctgcctccatcttaggcttgaaggcttctt	1245	2	n	5e-05	++++++++ ++
chr13:48549000-48552000	1951	ctacatggtgcatccctgtaatccagcacttagaaggtggaggcaggaggattataaagttcaagcaatccttgt	1983	2	y	7.7e-07	+ +++ ++++++++
chr13:48549000-48552000	2176	AACTATAGCAGTGTTCTTTGGGGTTTGGTTTTCAAGTCAGAGATTCACAGGAGACTaaaactcaggcctaggcca	2193	1	y	6.1e-05	++ +++ ++++
chr13:48549000-48552000	2626	ACCAGGTCGGGGAAACCTCCTTAAGAAACAATAagtcgggcatggtggaccactcctttaatcccagcacttggg aggcagaggcaggcgcatttctgagttcgaggctagcctggtctacagagtgagttccaggacagccagggctac	2699	2	y	4.3e-10	+++++++++++++++
chr13:48549000-48552000	2776	acagagaaaccatctggaaaaaccaaaaCCAAACACAAACAAAAGAAACAATAAGAagccaggcagtatgggctc	2800	1	n	5.1e-06	++++ +++ + +++
chr13:48549000-48552000	2851	acacctttaatcccagcgcttgggaagcagaggcaggtggatctctgtgagttagaggctaattccaggacagcc	2873	2	y	3.5e-09	+++ +++++++++++
chr13:48549000-48552000	2926	tgggctacaaagagaaaccctgtctgaaGGTTGGGAGTTAGAAGGAAGCAGCCCACTTCTTAATAAGTAGGTTTC	2959	2	y	9.4e-05	++++ +++ + + +
chr15:80126000-80129000	76	ctgacctccatggctgtgaggcacacacacagtacacagacataacagtacataaagaaacataaatctaagagg gaaaagaaGAATTTCAGACAAAgggctggcaagatgactcgagtgtgtaaaggcatgtattgctaaggccgatga	146	2	y	9.4e-05	++++ + + + ++
chr15:80126000-80129000	226	cctgagttcaatccccagaaGTTATCCCCTGACCTCCACAAAGATCACCCCCACATATGTCTGTGCGTGCGCGca cacacacacacacacacacacacaAAGTGCTGTAAGAGATTATTACTTTCATGACCATTTATGTAAGTTTAAAGT	299	3	n	7.7e-10	+++++++++++++++
chr15:80126000-80129000	451	TACATGTAAACGTGTCAGAAAGGGAACGTggggcaggagaaatgcctcagcggttaagagtgcttactctttttT	473	2	y	4.6e-05	+++ + ++++++
chr15:80126000-80129000	526	GTTTGGTTGTTTTTTTTtttttttttttttaaacatggtattacacagcactgactatcctgaaactccttgaac	535	1	y	3.7e-09	+++++++++++++++
chr15:80126000-80129000	601	tcacaaagatctgcttgcctccatctcccaattaaaagcatatgccaccaccagctgacAATTTACCGCTTTATA	614	2	n	4.3e-06	+ ++++++ ++++
chr15:80126000-80129000	1051	aagacagcgacaatgtacttacatataataaataaataaataaataaataaatctttttaaataaaagattaatt	1080	1	n	7.9e-07	+++ +++ +++ +++
chr15:80126000-80129000	1126	ttAGATCTAgtgtggtaggtcgcacctttaatcccagtgctcaggggcagaggcaggtgaatctttgagtttgag	1168	2	y	4.3e-08	+ ++++++++++++
chr15:80126000-80129000	1201	gccagcctggtctacagagcaagttcctggacagccagagaaaaccctgtctTtaaaaaaataaataaataaata	1255	1	n	1.8e-07	+++++++ +++ +++
chr15:80126000-80129000	1576	ggatacataaacccatacaggcacaaacacatacaaagtataaataaTATTCTCCCCCACCCCCCCagacagggt	1597	3	n	1.2e-05	++++ +++++ +++
chr15:80126000-80129000	1576	ggatacataaacccatacaggcacaaacacatacaaagtataaataaTATTCTCCCCCACCCCCCCagacagggt	1626	2	n	6.5e-05	++ ++ + ++ ++
chr15:80126000-80129000	1651	ttctctgagcagtcctggctgtcctggaactcactccgtagaccaggctgacctacaattcagagatcctcctgt ctctgcctcctgagtgctgggattaaagtgtgtgccaccaagcctggcCTATGAATTGTCATATAGAAAAAGGGA	1721	2	n	1.9e-09	++++ ++++++++++
chr15:80126000-80129000	1876	CTGCCACACTATCTACCAGCTCTGGGTTCTTGGTGGTCCTTCTATGACAACTTTTTCTGTCTCTGATGCTCACTT TTTTTTTTTTTttttttttttccgagacagggtttctctgtatagccctggctgtcctggaactcactttgtaga	1949	1	y	3.7e-09	+++++++++++++++
chr15:80126000-80129000	2026	ccaggctggccttgaactcagaaatctgcctgcctctgcctcccaagtgctgggattaaaggcgtgcgccaccac	2054	2	n	4.3e-10	+++++++++++++++
chr15:80126000-80129000	2176	cactcacttttttaatcccagcactggggaggcagaggcaggtggatctctgaggatctctgagtttgaggccag	2203	2	y	4.3e-10	+++++++++++++++
chr15:80126000-80129000	2251	cttggtctacagagcaaggtccaggagagtcaggaatacacagaaggaaaAAAGAAAAgaaaagatttaactgaa	2299	1	n	2.6e-06	+++++ ++++ ++++
chr15:80126000-80129000	2701	tttccctgctggactgtaggctccgtgagagcaaagGATTTTtgtgtgcgtgtgtgtgtgtgtgtgtgtgtgtgt gtgtgtgtgtgtgtgtgtAATTGGAAAAAAGTTTAGTTATAACCTCCTTGagtctaggctggtctcaaattcgtg	2750	3	y	7.7e-10	+++++++++++++++
chr15:80126000-80129000	2701	tttccctgctggactgtaggctccgtgagagcaaagGATTTTtgtgtgcgtgtgtgtgtgtgtgtgtgtgtgtgt gtgtgtgtgtgtgtgtgtAATTGGAAAAAAGTTTAGTTATAACCTCCTTGagtctaggctggtctcaaattcgtg	2766	3	y	7.7e-10	+++++++++++++++
chr15:80126000-80129000	2851	gtgatcctgctgcctcagcctcccaagtactgggattataggcatgtaccaacatgtctggctCTGAAAAAAAAT	2859	2	n	1.5e-07	+++++++ ++++++
chr19:6379000-6382000	1	TACAGGTGGAGGAGTGTGAATTGGTAATATGGATAACAAGCTATGGTTGGTGACTAAAGAAAAGCTCTGGCCGCC TTAGCCTTCCAGGAGACAGTACAGCCCAAGCTAACTTTAGAATGAGGTGCAGAGAAGCAGAGGCTGGAAACCACA	70	2	n	8.9e-05	+ ++++ ++++ +
chr19:6379000-6382000	1	TACAGGTGGAGGAGTGTGAATTGGTAATATGGATAACAAGCTATGGTTGGTGACTAAAGAAAAGCTCTGGCCGCC TTAGCCTTCCAGGAGACAGTACAGCCCAAGCTAACTTTAGAATGAGGTGCAGAGAAGCAGAGGCTGGAAACCACA	128	2	y	7.7e-07	++ ++++++++ ++
chr19:6379000-6382000	151	AAATGATGGTcacttgggaagcaggggcaggctggtgacagcaagttctagggcagccaatgctacacagagaaa	167	2	y	7.6e-08	+++ ++++ ++++++
chr19:6379000-6382000	301	TCTTAGAACCTGAATGCTAGGTCTAAGgctgggtgcaagggtgcaccctttaattctagcacttaaaggaagagt caggaggatctttgcatttgaggccaagttgaagttttaggccaaccaaggctgttaagaaacccACCATGGTCA	365	2	y	1.9e-05	+++ ++++ ++++
chr19:6379000-6382000	451	GCACAAATTAATAAGCTTTTATGAagccaggcagtggtggcacactttaagcacttgggaggcagaggcaggcag	508	2	y	4.3e-10	+++++++++++++++
chr19:6379000-6382000	601	tgtctcaaaaaactaaaaCAAAACAAGCTTTTATGAAAAAGTTGCCACAAgggactgagaatggctcagcgggta	608	1	n	3.8e-06	+++++ ++++ +++
chr19:6379000-6382000	751	tgagatccgatgccctcttctggggtgtctgaagacagctacagtgtacttacatataataaatcttaaaaacaa caaaaaCAGTTTagcaggtcgtggtggcgcacacctttaatcccagcactctggaggcaaaggcaagtggatctc	819	1	n	1.1e-05	++++ ++++++++ +
chr19:6379000-6382000	751	tgagatccgatgccctcttctggggtgtctgaagacagctacagtgtacttacatataataaatcttaaaaacaa caaaaaCAGTTTagcaggtcgtggtggcgcacacctttaatcccagcactctggaggcaaaggcaagtggatctc	878	2	y	1.1e-07	+++++++ +++++ +
chr19:6379000-6382000	901	tgagttcaaggccagcctggtctacaaagtgagttccaggacagccagggctatacagagaagacctgtcttgaa aaagcaaCAAAAAAGTCACAAAATAAGGCAAATTCTCAAGAACTTATAAATTCAGCTATGAGcagtgctggggag	974	1	n	1.3e-05	+++++ ++ +++++
chr19:6379000-6382000	1351	acatataataaataaataaatcttaaaaaaaaaaaaaaaaaaagaggcagattccaagaacctgtatgaaattgg	1356	1	n	1.3e-05	++ +++ +++ +++
chr19:6379000-6382000	1351	acatataataaataaataaatcttaaaaaaaaaaaaaaaaaaagaggcagattccaagaacctgtatgaaattgg	1375	1	n	3.7e-09	+++++++++++++++
chr19:6379000-6382000	1501	gggaggtgatccagcaggacactaaccctctagcatgcacacagaaagtcacaGAGGCCCTAAACCATCACAAGC	1538	3	n	9.3e-05	++++++ + + +++
chr19:6379000-6382000	1876	ggttaacttcaactcgtagagatccgcatggccttgagttctgggactaaaggtgtgtgccactgcgctctgcAA	1928	3	y	6.9e-05	+++++++ ++ +
chr19:6379000-6382000	1951	Gtttacctttgtgtatgtgtacatgtatgctgtgtgcagctgcctcagaataacaagggagcactggatccttgg	1965	3	y	2e-06	+++++ +++ ++
chr19:6379000-6382000	2401	ggaaggggatgagactcccaaggccccagtcctccctgatgataaatgggtagttggttgctgagggagggaaga	2456	2	y	2.2e-05	++ ++ ++++ +++
chr19:6379000-6382000	2551	cagcactcaagaggcagaggcaggcggatttctgagttcgaggccagcctggtctacagagtgagttccaggaca	2560	2	y	1.9e-09	++++++++++++++
chr19:6379000-6382000	2626	gccccaggactacacagagaaaccctgtctcgaaaaaccaaaaAAAAAAAAAAAAAAATGCCCATGCTCAgggct	2665	1	n	3.7e-09	+++++++++++++++
chr19:6379000-6382000	2851	ataaatctttaaaaaaaaaaaaaagtccatgccccagtaaagacctctcatccatgcttctataagccagcagcc	2860	1	n	3e-07	++++++++++++++
chr19:6379000-6382000	2926	ctagtgccctagtggttttcactgggacacacacacacacacacacacacacacacacacacgacagaagcagac	2953	3	n	7.7e-10	+++++++++++++++
chr19:6379000-6382000	2926	ctagtgccctagtggttttcactgggacacacacacacacacacacacacacacacacacacgacagaagcagac	2969	3	n	7.7e-10	+++++++++++++++
chr2:155332000-155335000	376	CCTCtctacttttattttatgtatttgggtgtcttgctagcatgtgtctgtgaaccacatgagtgcctggagccc	387	1	y	1.7e-05	++ ++++ + + +++
chr2:155332000-155335000	376	CCTCtctacttttattttatgtatttgggtgtcttgctagcatgtgtctgtgaaccacatgagtgcctggagccc	413	3	y	8.9e-05	+ +++++ ++++
chr2:155332000-155335000	601	tttcttctttctttttctttttctttcttttttttttttttttttcttcaagacggggtttctctatatagccct	608	1	y	3.3e-06	+++ +++++ +++++
chr2:155332000-155335000	601	tttcttctttctttttctttttctttcttttttttttttttttttcttcaagacggggtttctctatatagccct	628	1	y	3.7e-09	+++++++++++++++
chr2:155332000-155335000	676	tgctgtcctggaacttactctgtagaccaggctggcctcgaactcagaaatccacctgcctctgcctcctgagtg	730	2	n	4.3e-10	+++++++++++++++
chr2:155332000-155335000	751	ctggattaaaggcatgagccaccagccaccattgcccggcAAACCTATTTTCgtgtgtgtgtgtgtgtgtgtgtg tgtgtgtgtgtgtgtgtgtgtgtgtgtgtgttgtgtgtgtgtgtctgtgtCTGAGAGAGAAGGAAGGGGGACCGG	803	3	y	7.7e-10	+++++++++++++++
chr2:155332000-155335000	751	ctggattaaaggcatgagccaccagccaccattgcccggcAAACCTATTTTCgtgtgtgtgtgtgtgtgtgtgtg tgtgtgtgtgtgtgtgtgtgtgtgtgtgtgttgtgtgtgtgtgtctgtgtCTGAGAGAGAAGGAAGGGGGACCGG	819	3	y	7.7e-10	+++++++++++++++
chr2:155332000-155335000	751	ctggattaaaggcatgagccaccagccaccattgcccggcAAACCTATTTTCgtgtgtgtgtgtgtgtgtgtgtg tgtgtgtgtgtgtgtgtgtgtgtgtgtgtgttgtgtgtgtgtgtctgtgtCTGAGAGAGAAGGAAGGGGGACCGG	835	3	y	7.7e-10	+++++++++++++++
chr2:155332000-155335000	751	ctggattaaaggcatgagccaccagccaccattgcccggcAAACCTATTTTCgtgtgtgtgtgtgtgtgtgtgtg tgtgtgtgtgtgtgtgtgtgtgtgtgtgtgttgtgtgtgtgtgtctgtgtCTGAGAGAGAAGGAAGGGGGACCGG	860	3	y	3.6e-08	++++++++++ ++++
chr2:155332000-155335000	1276	caaattgttctttCCATGTGTACCATCACAATAAGCTCAGAGTGTatgtagctcagtagtagatggccgcacata catacgaccctgggtctcactctacacactggaaCAGGAATGCAATAGAGCAGTGTGCGGTGTGGCAGCAGCACT	1343	3	n	1.7e-05	+ ++++ +++ ++
chr2:155332000-155335000	1501	aagatcacaaactctagctgagctgtatgtaccaagaccctgtctcaaagcacacaaacaaaaAggctggggata	1548	1	n	3.1e-05	++ ++ +++++ +++
chr2:155332000-155335000	1576	tggctcagccgtagatcactggccttgggcttgattcccagcactacaaaaacaaaacaaaaaaaaccaaaacaa aaaaaccaaaagaaaaGAGCTGGCATTCAAACTGAGGTCATTTCTGACAGAGTATAAATCAACCTCACTCTATCC	1626	1	n	2e-07	++ ++++++++++++
chr2:155332000-155335000	1576	tggctcagccgtagatcactggccttgggcttgattcccagcactacaaaaacaaaacaaaaaaaaccaaaacaa aaaaaccaaaagaaaaGAGCTGGCATTCAAACTGAGGTCATTTCTGACAGAGTATAAATCAACCTCACTCTATCC	1645	1	n	1.1e-07	+++++++++++ ++
chr2:155332000-155335000	1876	agcacttgggagatagaggcaagattaaaagttcaaggtcaccctgtaagagcctatctcaaaaacaggaacaaa aAAAAAAAAGAAAGAAAAGAAACCCTCCCCCACACACACCAggctggagagattgctcggttaagagcttttgta	1884	2	y	4.7e-07	++++ +++++++ +
chr2:155332000-155335000	1876	agcacttgggagatagaggcaagattaaaagttcaaggtcaccctgtaagagcctatctcaaaaacaggaacaaa aAAAAAAAAGAAAGAAAAGAAACCCTCCCCCACACACACCAggctggagagattgctcggttaagagcttttgta	1948	1	n	8.2e-08	++++++++++++ ++
chr2:155332000-155335000	2626	TAAAAGGGAAGACttttaaatttttgttttaggggctggagaacgatgcagcagttacgagcactttttcatgca	2640	1	y	1.8e-05	+++ +++++++++
chr2:155332000-155335000	2776	ctggcctccagggcactgcgtgcatgtgatacacagtcatacatgcacacaaattatccccacagaaaataataa aattaaattaaatttaaaaaataaatataataaaattttattttagatagtatatcattaagcccaggctagcca	2813	3	n	1e-06	++ +++ ++++++
chr2:155332000-155335000	2776	ctggcctccagggcactgcgtgcatgtgatacacagtcatacatgcacacaaattatccccacagaaaataataa aattaaattaaatttaaaaaataaatataataaaattttattttagatagtatatcattaagcccaggctagcca	2842	1	n	2.4e-05	+++ ++ ++++ ++
chr2:155332000-155335000	2776	ctggcctccagggcactgcgtgcatgtgatacacagtcatacatgcacacaaattatccccacagaaaataataa aattaaattaaatttaaaaaataaatataataaaattttattttagatagtatatcattaagcccaggctagcca	2861	1	n	2.1e-05	++ ++++++ +++
chr2:155332000-155335000	2926	caaactgatacagagcagagaatgactccgcacttcatgcagcctttacctcccaaggtctgggagcaggtgtga	2964	2	n	4.1e-05	+ ++++ + +++++
chr3:133585000-133588000	376	TAGTACTGGTATTTTAAAAATTGATTTTAAAAGttattttatctgtatgggtgtgttacctgcatgtatgtctat gtaccacatgggtacctgttgtctgtaaagtgccaagacaagaagaaagtgtcagatctcatgcaactggaatta	414	3	y	7.3e-05	+ + +++ ++ +++
chr3:133585000-133588000	376	TAGTACTGGTATTTTAAAAATTGATTTTAAAAGttattttatctgtatgggtgtgttacctgcatgtatgtctat gtaccacatgggtacctgttgtctgtaaagtgccaagacaagaagaaagtgtcagatctcatgcaactggaatta	437	3	y	4.9e-05	+ +++ +++ + ++
chr3:133585000-133588000	826	gttcccagtacccacatggttggcagcccacaaccatctgtgactcccagttcaggggatcaaatgcctccctct ggcttttgtgggcaccaaatatgtgagctgtacacacacacacacacacacacacacacacacacactcaggcaa	892	2	n	7.8e-06	+++ ++++++ ++
chr3:133585000-133588000	826	gttcccagtacccacatggttggcagcccacaaccatctgtgactcccagttcaggggatcaaatgcctccctct ggcttttgtgggcaccaaatatgtgagctgtacacacacacacacacacacacacacacacacacactcaggcaa	933	3	n	7.7e-10	+++++++++++++++
[truncated: 476,997+ more rows]

## Sheet: MAST_MNX1_H3K4me1_UniqSeq
Chromosome	Start	End	Width	Strand	Combined p-value of all motif matches within region	E-value
chr5	145197000	145198000	1001	*	7.65e-15	5.2e-11
[truncated: 6,383 more rows]

## Sheet: MAST_MNX1_H3K4me3
Region	Start position of subregion relative to sequnces length	Sequence of subregion of containg motif match	Start position of motif match relative to sequnces length	Motif Index	Reverse complement	P-value	Match pattern
[truncated: 14,722 more rows]

[truncated: 1 more sheets: MAST_MNX1_H3K4me3_UniqSeq]
