# Supplementary material for: Role of MNX1-mediated Histone Modifications and PBX Gene Family in MNX1-induced Leukemogenesis
Source: Research Square preprint supplement (doi:10.21203/rs.3.rs-6480114/v1), 2025-09-25
Supplement: Supplementary file 5 [file a89e487d78a4d340c7c4b941.xlsx]

## Sheet: Proteins
Protein FDR Confidence	Accession	Description	# Peptides	# PSMs	# Unique Peptides	MW [kDa]	Abundance: M1	Abundance: M2	Abundance: M3	Abundance: C1	Abundance: C2	Abundance: C4
High	Q8VDD5	Myosin-9 OS=Mus musculus OX=10090 GN=Myh9 PE=1 SV=4	172	649	138	226.2	1937.8	70816.4	230776	2271.7	1902.6	3468
High	Q9JMH9	Unconventional myosin-XVIIIa OS=Mus musculus OX=10090 GN=Myo18a PE=1 SV=2	78	137	78	232.6	1002	13119.3	37078.6	770.3	624.4	718.4
High	P08032	Spectrin alpha chain, erythrocytic 1 OS=Mus musculus OX=10090 GN=Spta1 PE=1 SV=3	58	78	58	279.7	735.5	6590.5	23275.1	314.9	289.2	1098
High	Q9JKF1	Ras GTPase-activating-like protein IQGAP1 OS=Mus musculus OX=10090 GN=Iqgap1 PE=1 SV=2	54	82	51	188.6	7381.8	6223.9	7076.9	13530.4	4649.8	4436.2
High	O08638	Myosin-11 OS=Mus musculus OX=10090 GN=Myh11 PE=1 SV=1	51	116	29	226.9	70.2	1417.8	5875.2	50.9	22.8	46.5
High	Q62261	Spectrin beta chain, non-erythrocytic 1 OS=Mus musculus OX=10090 GN=Sptbn1 PE=1 SV=2	55	65	54	274.1	479.8	4331.8	17706.9	363.6	420.3	606.6
High	P60710	Actin, cytoplasmic 1 OS=Mus musculus OX=10090 GN=Actb PE=1 SV=1	24	153	9	41.7	406	5437.2	17361.3	405.4	300.1	387
High	P01027	Complement C3 OS=Mus musculus OX=10090 GN=C3 PE=1 SV=3	52	72	52	186.4	4581.4	4993.9	5732.7	5199.4	7505.8	6786.5
High	Q61879	Myosin-10 OS=Mus musculus OX=10090 GN=Myh10 PE=1 SV=2	37	96	9	228.9		31.4	59	2.8		5.8
High	E9Q557	Desmoplakin OS=Mus musculus OX=10090 GN=Dsp PE=1 SV=1	53	68	53	332.7	5632.7	2787.2	7162.4	5610	3882.5	5256.5
High	Q9D154	Leukocyte elastase inhibitor A OS=Mus musculus OX=10090 GN=Serpinb1a PE=1 SV=1	25	63	25	42.5	184.2	188.5	328.7	27356.1	1902.7	10723.6
High	Q3UQ44	Ras GTPase-activating-like protein IQGAP2 OS=Mus musculus OX=10090 GN=Iqgap2 PE=1 SV=2	42	56	39	180.4	4930.2	5530.7	5730	1262.6	2095.8	689.3
High	P26041	Moesin OS=Mus musculus OX=10090 GN=Msn PE=1 SV=3	37	66	26	67.7	1552	1552	1723.7	4041.1	3598.7	6552.1
High	P52480	Pyruvate kinase PKM OS=Mus musculus OX=10090 GN=Pkm PE=1 SV=4	26	47	25	57.8	948.5	695	1352.6	5596.5	1853.5	4240.4
High	P63017	Heat shock cognate 71 kDa protein OS=Mus musculus OX=10090 GN=Hspa8 PE=1 SV=1	35	65	31	70.8	6871.2	8475.1	14306.6	2499.2	2551	3184.4
High	Q9WTI7	Unconventional myosin-Ic OS=Mus musculus OX=10090 GN=Myo1c PE=1 SV=2	33	46	33	121.9	373	4723	15679.3	478.7	351.7	424
High	Q922U2	Keratin, type II cytoskeletal 5 OS=Mus musculus OX=10090 GN=Krt5 PE=1 SV=1	31	93	15	61.7	3733.4	2270.4	5202.5	4703.2	2705.8	2710.4
High	P16858	Glyceraldehyde-3-phosphate dehydrogenase OS=Mus musculus OX=10090 GN=Gapdh PE=1 SV=2	20	57	20	35.8	7832.6	7615.8	9193	5971.1	2807	3283.6
High	P68372	Tubulin beta-4B chain OS=Mus musculus OX=10090 GN=Tubb4b PE=1 SV=1	20	49	3	49.8	793.9	1136.3	1336.2	141.8	122.2	144.2
High	P99024	Tubulin beta-5 chain OS=Mus musculus OX=10090 GN=Tubb5 PE=1 SV=1	21	51	3	49.6	882	1129	1477.8	285	488.5	313.3
High	P62737	Actin, aortic smooth muscle OS=Mus musculus OX=10090 GN=Acta2 PE=1 SV=1	19	108	5	42	87.7	791	2340.3	42.5	29.2	34.7
High	P97351	40S ribosomal protein S3a OS=Mus musculus OX=10090 GN=Rps3a PE=1 SV=3	26	67	26	29.9	11554.8	12471.5	15850	659.7	558.8	579.6
High	Q9Z2T6	Keratin, type II cuticular Hb5 OS=Mus musculus OX=10090 GN=Krt85 PE=1 SV=2	25	88	5	55.7	1497.4	116	243.5	117.3	90.1	12297.3
High	P04187	Granzyme B(G,H) OS=Mus musculus OX=10090 GN=Gzmb PE=1 SV=1	21	80	20	27.5	321.2	284	566.4	29682	5660.3	23825.9
High	P97311	DNA replication licensing factor MCM6 OS=Mus musculus OX=10090 GN=Mcm6 PE=1 SV=1	27	49	27	92.8	3342.2	4597.5	4694.4	972.9	1406.3	716.8
High	Q03265	ATP synthase subunit alpha, mitochondrial OS=Mus musculus OX=10090 GN=Atp5f1a PE=1 SV=1	28	51	28	59.7	4877.9	6024.7	7796.8	2511.7	1902.6	1703.2
High	Q8BYC6	Serine/threonine-protein kinase TAO3 OS=Mus musculus OX=10090 GN=Taok3 PE=1 SV=2	28	42	24	105.3	5178	5754.2	6094.3	1434.4	2487.5	1733.6
High	P20029	Endoplasmic reticulum chaperone BiP OS=Mus musculus OX=10090 GN=Hspa5 PE=1 SV=3	30	48	27	72.4	2481.4	2222.1	4921.9	1918.5	1798	2625.9
High	P27659	60S ribosomal protein L3 OS=Mus musculus OX=10090 GN=Rpl3 PE=1 SV=3	25	51	25	46.1	5243.1	5943	7135.5	3195.3	4298.5	989
High	P15508	Spectrin beta chain, erythrocytic OS=Mus musculus OX=10090 GN=Sptb PE=1 SV=4	27	32	26	245.1	451.9	1759.1	4745.1	274.3	283.2	310
High	P68369	Tubulin alpha-1A chain OS=Mus musculus OX=10090 GN=Tuba1a PE=1 SV=1	19	52	2	50.1	95.8	230.4	325.1	34.7	28.6	15.2
High	Q9QWL7	Keratin, type I cytoskeletal 17 OS=Mus musculus OX=10090 GN=Krt17 PE=1 SV=3	25	73	8	48.1	1246.4	534.8	810.9	1103.8	1504.4	670.8
High	Q91VN6	Probable ATP-dependent RNA helicase DDX41 OS=Mus musculus OX=10090 GN=Ddx41 PE=1 SV=2	27	46	27	69.8	1767.1	2931.3	2138.5	3426	3451.9	2885.2
High	P62702	40S ribosomal protein S4, X isoform OS=Mus musculus OX=10090 GN=Rps4x PE=1 SV=2	20	54	20	29.6	7238.7	8815	10696.1	1318.2	2077.6	1137.7
High	Q7TNC4	Putative RNA-binding protein Luc7-like 2 OS=Mus musculus OX=10090 GN=Luc7l2 PE=1 SV=1	17	45	13	46.6	2368.8	5650	6171.5	98.3	191.4	83.4
High	P43277	Histone H1.3 OS=Mus musculus OX=10090 GN=H1-3 PE=1 SV=2	21	64	3	22.1	3815.2	2540.5	3304.5	24.4	255.9	11.2
High	P48193	Protein 4.1 OS=Mus musculus OX=10090 GN=Epb41 PE=1 SV=2	24	49	23	95.9	6190.8	6883	7934.1	616.9	515.8	525.8
High	Q6IMF0	Keratin, type II cuticular 87 OS=Mus musculus OX=10090 GN=Krt87 PE=2 SV=2	24	78	2	54.6			8.3	2.7		1601.4
High	Q91WN1	DnaJ homolog subfamily C member 9 OS=Mus musculus OX=10090 GN=Dnajc9 PE=1 SV=2	18	54	18	30	8570.8	8353.9	7357.1	541.1	3318	1893.6
High	P68373	Tubulin alpha-1C chain OS=Mus musculus OX=10090 GN=Tuba1c PE=1 SV=1	19	46	3	49.9	52.9	89	120.8	26	24	21.2
High	Q61781	Keratin, type I cytoskeletal 14 OS=Mus musculus OX=10090 GN=Krt14 PE=1 SV=2	19	66	1	52.8	337.8	154.5	411.7	416.4	243.1	255.8
High	P43274	Histone H1.4 OS=Mus musculus OX=10090 GN=H1-4 PE=1 SV=2	20	54	6	22	4998.7	3257.6	4005.3	47	2994.1	19.9
High	Q9ERE2	Keratin, type II cuticular Hb1 OS=Mus musculus OX=10090 GN=Krt81 PE=2 SV=2	23	79	3	52.8	185.2	57.8	125.5	44.4	8.5	7454.9
High	Q62167	ATP-dependent RNA helicase DDX3X OS=Mus musculus OX=10090 GN=Ddx3x PE=1 SV=3	25	38	5	73.1	236.3	227.9	258.7	58.4	49.8	58.3
High	Q9D8Y0	EF-hand domain-containing protein D2 OS=Mus musculus OX=10090 GN=Efhd2 PE=1 SV=1	15	46	15	26.8	259.7	4984.4	15283.4	201.3	256.3	158.7
High	P56480	ATP synthase subunit beta, mitochondrial OS=Mus musculus OX=10090 GN=Atp5f1b PE=1 SV=2	18	32	18	56.3	3147.9	3838.4	5146.6	1466.9	907.4	1418.5
High	P01868	Ig gamma-1 chain C region secreted form OS=Mus musculus OX=10090 GN=Ighg1 PE=1 SV=1	12	57	12	35.7	6556.6	6288.3	6524.8	6106.8	10350.2	9120.8
High	P49813	Tropomodulin-1 OS=Mus musculus OX=10090 GN=Tmod1 PE=1 SV=2	21	33	20	40.4	81.4	2807.7	9443.6	76.3	46.9	87.8
High	P15864	Histone H1.2 OS=Mus musculus OX=10090 GN=H1-2 PE=1 SV=2	20	54	7	21.3	6704.9	4375.4	5292.4	53.3	1432.9	29
High	P11499	Heat shock protein HSP 90-beta OS=Mus musculus OX=10090 GN=Hsp90ab1 PE=1 SV=3	21	35	13	83.2	1107	1507.4	3204.6	969.4	1581.1	1776.7
High	Q62191	E3 ubiquitin-protein ligase TRIM21 OS=Mus musculus OX=10090 GN=Trim21 PE=1 SV=1	21	54	21	54.1	5281.8	10837.5	9213	2785.6	4993.7	1013.7
High	Q9QXS1	Plectin OS=Mus musculus OX=10090 GN=Plec PE=1 SV=3	32	34	31	533.9	379.8	681.8	2049.5	508.1	413.6	1720.1
High	Q9CYI4	Putative RNA-binding protein Luc7-like 1 OS=Mus musculus OX=10090 GN=Luc7l PE=1 SV=2	17	45	13	43.9	3241.1	5367.5	5925.7	81.7	214.5	121.5
High	Q3U9G9	Delta(14)-sterol reductase LBR OS=Mus musculus OX=10090 GN=Lbr PE=1 SV=2	22	53	22	71.4	11395.8	9141.7	11417.8	476.6	896.8	452.6
High	Q02257	Junction plakoglobin OS=Mus musculus OX=10090 GN=Jup PE=1 SV=3	23	33	20	81.7	2078.4	1092.4	3691.9	2685.9	1502.1	2677.5
High	Q61656	Probable ATP-dependent RNA helicase DDX5 OS=Mus musculus OX=10090 GN=Ddx5 PE=1 SV=2	28	44	20	69.2	3745.5	3481	3964.3	185.8	382.4	206.2
High	Q61765	Keratin, type I cuticular Ha1 OS=Mus musculus OX=10090 GN=Krt31 PE=1 SV=2	20	64	5	47.1	177.8	20.5	38.8	14.7	20.3	6182.5
High	Q8BTM8	Filamin-A OS=Mus musculus OX=10090 GN=Flna PE=1 SV=5	24	29	22	281	1135.5	1419.4	2773.3	523.8	1051.9	1156.9
High	P29351	Tyrosine-protein phosphatase non-receptor type 6 OS=Mus musculus OX=10090 GN=Ptpn6 PE=1 SV=2	22	32	22	67.5	4661.3	5920.4	6683.8	900.8	1475.1	926.7
High	P68368	Tubulin alpha-4A chain OS=Mus musculus OX=10090 GN=Tuba4a PE=1 SV=1	18	44	5	49.9	485.4	737.1	981.6	133	296.8	267.6
High	Q9DBE9	pre-rRNA 2'-O-ribose RNA methyltransferase FTSJ3 OS=Mus musculus OX=10090 GN=Ftsj3 PE=1 SV=1	22	35	22	95.5	4808.9	4564.4	6198.9	65.3	75.1	88.2
High	P62908	40S ribosomal protein S3 OS=Mus musculus OX=10090 GN=Rps3 PE=1 SV=1	19	43	19	26.7	5942.6	8051.9	9614	2913.2	2655.1	1383
High	P28293	Cathepsin G OS=Mus musculus OX=10090 GN=Ctsg PE=1 SV=2	14	43	14	29.1	283.6	215.3	283.2	295.1	10648.6	9809.2
High	Q62351	Transferrin receptor protein 1 OS=Mus musculus OX=10090 GN=Tfrc PE=1 SV=1	18	28	18	85.7	2842.1	3723.4	5688.6	194.8	673.3	302.1
High	Q3UEB3	Poly(U)-binding-splicing factor PUF60 OS=Mus musculus OX=10090 GN=Puf60 PE=1 SV=2	17	29	17	60.2	1952.2	4589.6	6015.2	117	81.3	183.4
High	Q62095	ATP-dependent RNA helicase DDX3Y OS=Mus musculus OX=10090 GN=Ddx3y PE=1 SV=2	21	34	1	73.4
High	P25206	DNA replication licensing factor MCM3 OS=Mus musculus OX=10090 GN=Mcm3 PE=1 SV=2	19	25	19	91.5	1314.1	1975.1	2216.3	394.2	725.2	1130.3
High	P01837	Immunoglobulin kappa constant OS=Mus musculus OX=10090 GN=Igkc PE=1 SV=2	8	128	8	11.9	8527.6	8708.1	9510.1	8309.3	7644.3	7408.8
High	Q9ERD7	Tubulin beta-3 chain OS=Mus musculus OX=10090 GN=Tubb3 PE=1 SV=1	13	27	1	50.4	56.8	63.9	98	8.5	10.4	24.5
High	Q9JHJ0	Tropomodulin-3 OS=Mus musculus OX=10090 GN=Tmod3 PE=1 SV=1	19	31	18	39.5	192	3090	10543.8	203.8	148.2	260.2
High	P17182	Alpha-enolase OS=Mus musculus OX=10090 GN=Eno1 PE=1 SV=3	18	30	16	47.1	1696.2	2032.2	2661.2	4424.8	2727.8	4496.3
High	P10126	Elongation factor 1-alpha 1 OS=Mus musculus OX=10090 GN=Eef1a1 PE=1 SV=3	16	44	16	50.1	5756.7	7787.4	10784.6	2452.1	2167.8	2593.7
High	P47753	F-actin-capping protein subunit alpha-1 OS=Mus musculus OX=10090 GN=Capza1 PE=1 SV=4	10	19	8	32.9	54.2	2002.3	6400.7	90.5	41.6	82.9
High	P58771	Tropomyosin alpha-1 chain OS=Mus musculus OX=10090 GN=Tpm1 PE=1 SV=1	22	46	8	32.7	99.5	1739.3	7207.9	85.4	75.9	161.4
High	Q8CI11	Guanine nucleotide-binding protein-like 3 OS=Mus musculus OX=10090 GN=Gnl3 PE=1 SV=2	18	28	18	60.7	3196.3	3577.4	5041.5	85.2	113.2	107.2
High	P26369	Splicing factor U2AF 65 kDa subunit OS=Mus musculus OX=10090 GN=U2af2 PE=1 SV=3	13	28	13	53.5	2068.4	3490.4	4648.9	309.1	177	229.6
High	P62751	60S ribosomal protein L23a OS=Mus musculus OX=10090 GN=Rpl23a PE=1 SV=1	14	56	14	17.7	17672.8	18242.6	22678	360.3	229.2	180.4
High	P43276	Histone H1.5 OS=Mus musculus OX=10090 GN=H1-5 PE=1 SV=2	15	37	11	22.6	10066.7	6864.1	8656.2	182.7	2206.6	199.3
High	P25444	40S ribosomal protein S2 OS=Mus musculus OX=10090 GN=Rps2 PE=1 SV=3	15	42	15	31.2	1882.4	2734	3378.3	3985.8	21507.1	7769.5
High	Q6IFX2	Keratin, type I cytoskeletal 42 OS=Mus musculus OX=10090 GN=Krt42 PE=1 SV=1	18	44	6	50.1	2404.3	1302.9	2605.8	2455.4	1886.1	1922.9
High	Q9CPR4	60S ribosomal protein L17 OS=Mus musculus OX=10090 GN=Rpl17 PE=1 SV=3	16	36	16	21.4	9114	10935.2	13935.1	360.6	512.4	503.9
High	P21107	Tropomyosin alpha-3 chain OS=Mus musculus OX=10090 GN=Tpm3 PE=1 SV=3	21	46	10	33	106.2	2383.9	9443.5	156.5	166.3	258.1
High	Q61233	Plastin-2 OS=Mus musculus OX=10090 GN=Lcp1 PE=1 SV=4	18	22	18	70.1	353.1	2331.4	6266.4	582.7	657.5	1227.4
High	Q5SUA5	Unconventional myosin-Ig OS=Mus musculus OX=10090 GN=Myo1g PE=1 SV=1	20	29	20	117.2	189.8	1454	5627	293.2	526.4	441.2
High	Q8BFZ3	Beta-actin-like protein 2 OS=Mus musculus OX=10090 GN=Actbl2 PE=1 SV=1	10	56	1	42	36.1	633.3	1978	39.5	19.8	31.6
High	P50446	Keratin, type II cytoskeletal 6A OS=Mus musculus OX=10090 GN=Krt6a PE=1 SV=3	21	60	6	59.3	2103.9	562	859.8	1578.5	1690.9	1034
High	Q922D8	C-1-tetrahydrofolate synthase, cytoplasmic OS=Mus musculus OX=10090 GN=Mthfd1 PE=1 SV=4	22	29	21	101.1	2978.7	3951.1	5587.8	648.8	1132.1	893.5
High	Q8VH51	RNA-binding protein 39 OS=Mus musculus OX=10090 GN=Rbm39 PE=1 SV=2	13	28	13	59.4	2890.8	4504.3	4610.7	115.7	79.4	690.9
High	P26043	Radixin OS=Mus musculus OX=10090 GN=Rdx PE=1 SV=3	23	35	12	68.5	556.2	593.7	689.3	1108	554.8	804.7
High	Q04750	DNA topoisomerase 1 OS=Mus musculus OX=10090 GN=Top1 PE=1 SV=2	22	32	22	90.8	5001.9	4107.2	5785.4	367.2	456.7	491.6
High	Q921N6	Probable ATP-dependent RNA helicase DDX27 OS=Mus musculus OX=10090 GN=Ddx27 PE=1 SV=3	19	25	19	85.9	2946.7	3189.9	4247.6	105.2	203.7	196.1
High	Q922B2	Aspartate--tRNA ligase, cytoplasmic OS=Mus musculus OX=10090 GN=Dars1 PE=1 SV=2	20	26	20	57.1	2180.1	2543.5	2841.4	809.6	1176.9	955.5
High	Q61823	Programmed cell death protein 4 OS=Mus musculus OX=10090 GN=Pdcd4 PE=1 SV=1	18	25	18	51.7	1490.6	2130.9	1829.8	130	56.9	75.7
High	Q8K0Y2	Keratin, type I cuticular Ha3-I OS=Mus musculus OX=10090 GN=Krt33a PE=1 SV=1	15	45	3	46.1	753.7	48.7	127.4	67.5	24.7	4993.7
High	Q9QX47	Protein SON OS=Mus musculus OX=10090 GN=Son PE=1 SV=2	13	23	13	265.5	2951.8	2276.8	2451.7	267.2	803	171.8
High	Q61897	Keratin, type I cuticular Ha3-II OS=Mus musculus OX=10090 GN=Krt33b PE=1 SV=2	14	57	2	45.8	3.5	7.2	11.5	6.4	14.7	318.4
High	P47757	F-actin-capping protein subunit beta OS=Mus musculus OX=10090 GN=Capzb PE=1 SV=3	17	38	17	31.3	308.4	5132	16093.3	300	266.3	353.8
High	Q60605	Myosin light polypeptide 6 OS=Mus musculus OX=10090 GN=Myl6 PE=1 SV=3	9	41	9	16.9	182.9	6932.6	21018.8	222.3	158.6	301.3
High	P49717	DNA replication licensing factor MCM4 OS=Mus musculus OX=10090 GN=Mcm4 PE=1 SV=1	16	21	16	96.7	2319.5	2930.4	3044.4	573.6	687.9	409.1
High	P62843	40S ribosomal protein S15 OS=Mus musculus OX=10090 GN=Rps15 PE=1 SV=2	6	51	6	17	9530.9	11200.5	12915.5	3067.7	6509.7	842.1
High	P70248	Unconventional myosin-If OS=Mus musculus OX=10090 GN=Myo1f PE=1 SV=1	19	35	16	125.9	553	642.9	830.5	1660.6	11044	5506.3
High	P61222	ATP-binding cassette sub-family E member 1 OS=Mus musculus OX=10090 GN=Abce1 PE=1 SV=1	17	20	17	67.3	2373.6	3196.7	3739.7	538.2	555.2	476.6
High	Q61136	Serine/threonine-protein kinase PRP4 homolog OS=Mus musculus OX=10090 GN=Prpf4b PE=1 SV=3	13	27	13	116.9	4036.9	3851.9	4351.4	537.3	1089.7	158.1
High	P70399	TP53-binding protein 1 OS=Mus musculus OX=10090 GN=Tp53bp1 PE=1 SV=3	17	21	17	212.6	1070.9	1834.9	2341.3	1239.2	66.4	90.3
High	Q8BP67	60S ribosomal protein L24 OS=Mus musculus OX=10090 GN=Rpl24 PE=1 SV=2	14	33	14	17.8	5448	5961.3	9612.8	197.9	411.3	288.7
High	P47963	60S ribosomal protein L13 OS=Mus musculus OX=10090 GN=Rpl13 PE=1 SV=3	13	39	13	24.3	6419.7	6673.1	9237.1	148.1	181.7	272.8
High	P58774	Tropomyosin beta chain OS=Mus musculus OX=10090 GN=Tpm2 PE=1 SV=1	18	34	5	32.8	89.9	357	2162.8	40.6	40.9	64.1
High	P84091	AP-2 complex subunit mu OS=Mus musculus OX=10090 GN=Ap2m1 PE=1 SV=1	16	28	16	49.6	522.5	537.3	727.3	4915.1	3827.6	6522.9
High	Q91YQ5	Dolichyl-diphosphooligosaccharide--protein glycosyltransferase subunit 1 OS=Mus musculus OX=10090 GN=Rpn1 PE=1 SV=1	20	27	20	68.5	2504.9	2969.9	4689.5	1082.5	1158.8	992
High	P14148	60S ribosomal protein L7 OS=Mus musculus OX=10090 GN=Rpl7 PE=1 SV=2	19	30	19	31.4	1863.9	2586.4	3366	2309	10014.2	2259.5
High	Q8BFR5	Elongation factor Tu, mitochondrial OS=Mus musculus OX=10090 GN=Tufm PE=1 SV=1	14	20	14	49.5	2178.2	2782.9	3736.6	427	378	321
High	Q61881	DNA replication licensing factor MCM7 OS=Mus musculus OX=10090 GN=Mcm7 PE=1 SV=1	15	21	15	81.2	1640.8	2207.3	2376.1	572.8	1004.7	664.1
High	P07724	Albumin OS=Mus musculus OX=10090 GN=Alb PE=1 SV=3	16	28	16	68.6	3358.9	1533.6	2319	1678.2	1665.3	2084.6
High	P62082	40S ribosomal protein S7 OS=Mus musculus OX=10090 GN=Rps7 PE=2 SV=1	15	42	15	22.1	10504	11000	12046.9	349.9	1635.9	274.4
High	Q5SWD9	Pre-rRNA-processing protein TSR1 homolog OS=Mus musculus OX=10090 GN=Tsr1 PE=1 SV=1	16	27	16	92	2118.4	2151.3	2577.2	1098.6	3737.9	1138.2
High	Q9Z2K1	Keratin, type I cytoskeletal 16 OS=Mus musculus OX=10090 GN=Krt16 PE=1 SV=3	13	48	7	51.6	2351.6	856.3	1348.8	1488.1	2138.5	1592.1
High	P62754	40S ribosomal protein S6 OS=Mus musculus OX=10090 GN=Rps6 PE=1 SV=1	15	39	15	28.7	4869.6	6522.6	8284.9	352.6	239.1	207.9
High	Q5F2E8	Serine/threonine-protein kinase TAO1 OS=Mus musculus OX=10090 GN=Taok1 PE=1 SV=1	17	22	13	116	1639.2	1532.7	1757.6	641.7	2190.4	1010.8
High	P07901	Heat shock protein HSP 90-alpha OS=Mus musculus OX=10090 GN=Hsp90aa1 PE=1 SV=4	16	22	9	84.7	552.4	678.8	1806.4	338.4	533.2	803.6
High	P62983	Ubiquitin-40S ribosomal protein S27a OS=Mus musculus OX=10090 GN=Rps27a PE=1 SV=2	12	24	8	17.9	2547.9	2831.9	3507.8	250.1	482.5	104.3
High	Q61838	Pregnancy zone protein OS=Mus musculus OX=10090 GN=Pzp PE=1 SV=3	18	24	18	165.7	1180.1	1223.6	1430.2	1272.1	1819.9	1610.4
High	Q9JIK5	Nucleolar RNA helicase 2 OS=Mus musculus OX=10090 GN=Ddx21 PE=1 SV=3	16	23	16	93.5	3289.1	2425.2	3341	600.3	823.7	610.9
High	P60843	Eukaryotic initiation factor 4A-I OS=Mus musculus OX=10090 GN=Eif4a1 PE=1 SV=1	14	22	7	46.1	762.9	968	1485.1	583.7	811.9	622.2
High	Q3THE2	Myosin regulatory light chain 12B OS=Mus musculus OX=10090 GN=Myl12b PE=1 SV=2	10	27	4	19.8	28.9	912.3	3283.2	37.2	21.5	38.6
High	P21812	Mast cell protease 4 OS=Mus musculus OX=10090 GN=Mcpt4 PE=1 SV=1	11	31	11	27.2	208.3	145.6	274	5759.9	1033	13658
High	Q7TPV4	Myb-binding protein 1A OS=Mus musculus OX=10090 GN=Mybbp1a PE=1 SV=2	15	21	15	151.9	1869.1	1927.4	2676.6	177.8	369.3	490.5
High	O70310	Glycylpeptide N-tetradecanoyltransferase 1 OS=Mus musculus OX=10090 GN=Nmt1 PE=1 SV=1	13	20	13	56.9	1730.9	1631.5	2166.1	147.3	167.8	227.9
High	P63276	40S ribosomal protein S17 OS=Mus musculus OX=10090 GN=Rps17 PE=1 SV=2	9	34	9	15.5	5739.2	6474.6	6848.5	2009	3190.9	170.6
High	P51881	ADP/ATP translocase 2 OS=Mus musculus OX=10090 GN=Slc25a5 PE=1 SV=3	14	31	8	32.9	2501.6	3188.5	4001.8	1100.3	1164	1049.1
High	Q6ZWN5	40S ribosomal protein S9 OS=Mus musculus OX=10090 GN=Rps9 PE=1 SV=3	17	51	17	22.6	6979.6	8729.5	9650.5	1819.1	9802.9	3426.9
High	Q9DB77	Cytochrome b-c1 complex subunit 2, mitochondrial OS=Mus musculus OX=10090 GN=Uqcrc2 PE=1 SV=1	13	21	13	48.2	3164.9	3876.4	4281.5	1499.6	827.5	756
High	P62301	40S ribosomal protein S13 OS=Mus musculus OX=10090 GN=Rps13 PE=1 SV=2	14	33	14	17.2	6470.1	7436.1	8349.5	824	1116.3	982.5
High	Q9WTM5	RuvB-like 2 OS=Mus musculus OX=10090 GN=Ruvbl2 PE=1 SV=3	16	17	16	51.1	1024.3	1247.5	1462.8	325.3	512.4	435.7
High	P58252	Elongation factor 2 OS=Mus musculus OX=10090 GN=Eef2 PE=1 SV=2	18	27	17	95.3	1403.8	1595.8	2915.3	809.4	1014.1	1309
High	Q99JY9	Actin-related protein 3 OS=Mus musculus OX=10090 GN=Actr3 PE=1 SV=3	15	19	15	47.3	126.5	935	3076.1	136.4	164.5	207
High	P26040	Ezrin OS=Mus musculus OX=10090 GN=Ezr PE=1 SV=3	18	28	8	69.4	194.8	223.6	368.7	923.7	433	315
High	O08784	Treacle protein OS=Mus musculus OX=10090 GN=Tcof1 PE=1 SV=1	15	20	15	134.9	2695.3	2713.9	4054.8	147.3	211.2	160.2
High	Q3TTY5	Keratin, type II cytoskeletal 2 epidermal OS=Mus musculus OX=10090 GN=Krt2 PE=1 SV=1	13	45	8	70.9	2233.2	1494	6050.6	2122.3	1163.9	1540.1
High	Q922F4	Tubulin beta-6 chain OS=Mus musculus OX=10090 GN=Tubb6 PE=1 SV=1	10	21	1	50.1	119.3	165.7	187.4	44	79	63.7
High	Q6ZWV3	60S ribosomal protein L10 OS=Mus musculus OX=10090 GN=Rpl10 PE=1 SV=3	12	26	2	24.6	1011.3	1391.5	1668.8	10.6	14.3	12.6
High	P49718	DNA replication licensing factor MCM5 OS=Mus musculus OX=10090 GN=Mcm5 PE=1 SV=2	15	19	15	82.4	2012.9	3117.5	3420.9	458.9	751	522.8
High	P07759	Serine protease inhibitor A3K OS=Mus musculus OX=10090 GN=Serpina3k PE=1 SV=2	12	21	11	46.9	952	991.4	1116.5	1046.1	980.7	951.6
High	Q1HFZ0	RNA cytosine C(5)-methyltransferase NSUN2 OS=Mus musculus OX=10090 GN=Nsun2 PE=1 SV=2	16	20	16	85.4	2081.5	2181	2326.2	181.4	353.9	255.3
High	Q9D8E6	60S ribosomal protein L4 OS=Mus musculus OX=10090 GN=Rpl4 PE=1 SV=3	16	24	16	47.1	1120.9	1520.1	1980.4	1471.3	5562.4	366.9
High	P62830	60S ribosomal protein L23 OS=Mus musculus OX=10090 GN=Rpl23 PE=1 SV=1	12	31	12	14.9	4290.8	4442	6093	122.6	150.7	214.2
High	P62806	Histone H4 OS=Mus musculus OX=10090 GN=H4c1 PE=1 SV=2	8	25	8	11.4	3714.9	1745.2	1145.6	1082.7	1058.7	3455.1
High	P02535	Keratin, type I cytoskeletal 10 OS=Mus musculus OX=10090 GN=Krt10 PE=1 SV=3	11	64	7	57.7	5006.1	2903.5	8328.2	4055.8	2458.1	2704
High	Q8BGZ7	Keratin, type II cytoskeletal 75 OS=Mus musculus OX=10090 GN=Krt75 PE=1 SV=1	14	49	2	59.7	209.2	131.7	257.6	286	169.5	169.2
High	Q64525	Histone H2B type 2-B OS=Mus musculus OX=10090 GN=Hist2h2bb PE=1 SV=3	11	33	4	13.9	578.7	426.8	506.7	1494.6	1161	4965.2
High	Q501J6	Probable ATP-dependent RNA helicase DDX17 OS=Mus musculus OX=10090 GN=Ddx17 PE=1 SV=1	16	26	8	72.4	704	728.3	803.9	239.3	536.1	384.5
High	P14869	60S acidic ribosomal protein P0 OS=Mus musculus OX=10090 GN=Rplp0 PE=1 SV=3	13	17	13	34.2	1779.2	2252.5	3016.4	771.6	1249.1	1035.2
High	P68040	Receptor of activated protein C kinase 1 OS=Mus musculus OX=10090 GN=Rack1 PE=1 SV=3	12	24	12	35.1	2092.1	2499.4	3018.7	616.9	1011.3	714.4
High	Q497I4	Keratin, type I cuticular Ha5 OS=Mus musculus OX=10090 GN=Krt35 PE=1 SV=1	15	44	9	50.5	167.8	86.7	164.1	62.6	46.1	8261.9
High	Q69ZA1	Cyclin-dependent kinase 13 OS=Mus musculus OX=10090 GN=Cdk13 PE=1 SV=3	15	21	15	164.5	1245.7	1598.3	2337.5	48.4	81.3	54.6
High	P38647	Stress-70 protein, mitochondrial OS=Mus musculus OX=10090 GN=Hspa9 PE=1 SV=3	14	16	13	73.4	972.6	1123.8	1985.2	296.9	366	488.7
High	Q9WUA3	ATP-dependent 6-phosphofructokinase, platelet type OS=Mus musculus OX=10090 GN=Pfkp PE=1 SV=1	13	19	11	85.4	907.7	1136.3	1500	957.9	630.4	1090.7
High	Q8BK67	Protein RCC2 OS=Mus musculus OX=10090 GN=Rcc2 PE=1 SV=1	17	20	17	55.9	4089.6	2452	2970.9	233.7	842.2	461.9
High	P62270	40S ribosomal protein S18 OS=Mus musculus OX=10090 GN=Rps18 PE=1 SV=3	12	30	12	17.7	4966	6515.5	8106.6	412.2	470.8	344.4
High	Q8CD15	Ribosomal oxygenase 2 OS=Mus musculus OX=10090 GN=Riox2 PE=1 SV=2	10	15	10	53.5	1974.4	2633.9	2794.6	207.4	483.8	226.6
High	P11983	T-complex protein 1 subunit alpha OS=Mus musculus OX=10090 GN=Tcp1 PE=1 SV=3	13	18	13	60.4	1726.9	1874.7	2385.1	463.8	796.1	748.4
High	P48999	Polyunsaturated fatty acid 5-lipoxygenase OS=Mus musculus OX=10090 GN=Alox5 PE=1 SV=3	11	17	11	77.9	603.8	635.3	945.6	1286.2	273	856.9
High	P20152	Vimentin OS=Mus musculus OX=10090 GN=Vim PE=1 SV=3	16	22	14	53.7	596.9	589.4	944.5	1287.9	654.9	1945.1
High	P47754	F-actin-capping protein subunit alpha-2 OS=Mus musculus OX=10090 GN=Capza2 PE=1 SV=3	9	16	7	32.9	101.9	1156.7	3649.9	138.7	82	133
High	P61255	60S ribosomal protein L26 OS=Mus musculus OX=10090 GN=Rpl26 PE=1 SV=1	13	36	13	17.2	5095.8	5314.4	6764.4	2572	4406.8	3639.2
High	O54988	STE20-like serine/threonine-protein kinase OS=Mus musculus OX=10090 GN=Slk PE=1 SV=2	14	18	14	141.4	684.9	545.4	624.3	607.7	926.5	677.1
High	P62267	40S ribosomal protein S23 OS=Mus musculus OX=10090 GN=Rps23 PE=1 SV=3	8	25	8	15.8	5619.9	7646.9	10067	92.8	99.2	62.9
High	P62264	40S ribosomal protein S14 OS=Mus musculus OX=10090 GN=Rps14 PE=1 SV=3	7	21	7	16.3	2763.2	3206.5	3812.6	83.9	43.7	53.6
High	P08730	Keratin, type I cytoskeletal 13 OS=Mus musculus OX=10090 GN=Krt13 PE=1 SV=2	12	41	4	47.7	792.9	684	1288	673.9	329.6	255.9
High	Q6NVF9	Cleavage and polyadenylation specificity factor subunit 6 OS=Mus musculus OX=10090 GN=Cpsf6 PE=1 SV=1	11	20	11	59.1	1600.8	2710.5	3619.1	82.3	123.1	97.4
High	B2RQC6	CAD protein OS=Mus musculus OX=10090 GN=Cad PE=1 SV=1	17	22	17	243.1	963.7	1428.7	1900.2	324.1	995.6	558.7
High	P62242	40S ribosomal protein S8 OS=Mus musculus OX=10090 GN=Rps8 PE=1 SV=2	9	23	9	24.2	4455.7	5273.9	6663.8	730.8	657.6	142.6
High	Q8K363	ATP-dependent RNA helicase DDX18 OS=Mus musculus OX=10090 GN=Ddx18 PE=1 SV=1	15	22	15	74.1	2438	2536.4	2908.8	225.9	456.8	237.4
High	P09405	Nucleolin OS=Mus musculus OX=10090 GN=Ncl PE=1 SV=2	16	19	16	76.7	628.2	781.4	2137.4	280.4	342.1	625.3
High	Q9CWX9	Probable ATP-dependent RNA helicase DDX47 OS=Mus musculus OX=10090 GN=Ddx47 PE=2 SV=2	12	15	12	50.6	2427.3	2393.5	2475.8	282.1	720.3	273.1
High	P28665	Murinoglobulin-1 OS=Mus musculus OX=10090 GN=Mug1 PE=1 SV=3	11	15	11	165.2	495.2	510.2	637.6	477.9	744.7	654.3
High	P14206	40S ribosomal protein SA OS=Mus musculus OX=10090 GN=Rpsa PE=1 SV=4	8	17	8	32.8	1807	2380.8	2761.9	351.2	424.8	637.5
High	P62245	40S ribosomal protein S15a OS=Mus musculus OX=10090 GN=Rps15a PE=1 SV=2	10	21	10	14.8	2525.8	3501.8	4123.2	1395.5	1710.8	1354.5
High	Q99LE6	ATP-binding cassette sub-family F member 2 OS=Mus musculus OX=10090 GN=Abcf2 PE=1 SV=1	15	21	15	71.7	2539	3189.6	3843.1	266.6	382.9	290.5
High	Q9D2U9	H2B.U histone 2 OS=Mus musculus OX=10090 GN=H2bu2 PE=1 SV=3	9	24	2	14	94	78.4	79.5	195.4	157.6	652.9
High	O54774	AP-3 complex subunit delta-1 OS=Mus musculus OX=10090 GN=Ap3d1 PE=1 SV=1	11	16	11	135	667.8	613.2	615.2	863.4	3479.2	561.7
High	Q9CY21	Probable 18S rRNA (guanine-N(7))-methyltransferase OS=Mus musculus OX=10090 GN=Bud23 PE=1 SV=1	8	21	8	31.6	1735.7	1843.1	2221.8	39.8	81.7	30.4
High	P48678	Prelamin-A/C OS=Mus musculus OX=10090 GN=Lmna PE=1 SV=2	14	19	13	74.2	827.7	765.4	1816.7	557.7	429.3	918.1
High	O55098	Serine/threonine-protein kinase 10 OS=Mus musculus OX=10090 GN=Stk10 PE=1 SV=2	16	19	16	111.8	1895.7	1797.4	2004.6	214.5	2128.4	1214.3
High	P62827	GTP-binding nuclear protein Ran OS=Mus musculus OX=10090 GN=Ran PE=1 SV=3	9	18	9	24.4	2794.4	3884.4	4449.9	1257.9	994	628.3
High	P08003	Protein disulfide-isomerase A4 OS=Mus musculus OX=10090 GN=Pdia4 PE=1 SV=3	11	16	11	71.9	521.7	508.8	814.8	1428.5	1044.2	1533.3
High	P62889	60S ribosomal protein L30 OS=Mus musculus OX=10090 GN=Rpl30 PE=1 SV=2	7	20	7	12.8	867.4	949.1	1246	2023.1	2261.5	4346.6
High	P43275	Histone H1.1 OS=Mus musculus OX=10090 GN=H1-1 PE=1 SV=2	11	28	9	21.8	6472.9	5026.1	7213.1	77.2	1205.1	65.3
High	Q8BKJ9	NAD-dependent protein deacetylase sirtuin-7 OS=Mus musculus OX=10090 GN=Sirt7 PE=1 SV=2	13	16	13	45.1	1675.6	2311.2	2405	175	313.2	258.3
High	Q9QZW9	Motor neuron and pancreas homeobox protein 1 OS=Mus musculus OX=10090 GN=Mnx1 PE=2 SV=2	7	21	7	41.3	4290.7	4281.6	5708.7	109.2	206	165
High	Q8BWT1	3-ketoacyl-CoA thiolase, mitochondrial OS=Mus musculus OX=10090 GN=Acaa2 PE=1 SV=3	11	12	11	41.8	411.4	573.2	645.4	76.6	87.7	77.1
High	P97868	E3 ubiquitin-protein ligase RBBP6 OS=Mus musculus OX=10090 GN=Rbbp6 PE=1 SV=5	12	16	12	199.5	1411.7	1420.2	1829.6	114.8	154.3	122.8
High	Q9CXW4	60S ribosomal protein L11 OS=Mus musculus OX=10090 GN=Rpl11 PE=1 SV=4	11	22	11	20.2	2998.6	3522.2	3919	584.5	1959.4	483
High	P51410	60S ribosomal protein L9 OS=Mus musculus OX=10090 GN=Rpl9 PE=1 SV=2	10	22	10	21.9	4454.1	5425.6	6482.4	863.3	1755.7	670
High	Q99JY0	Trifunctional enzyme subunit beta, mitochondrial OS=Mus musculus OX=10090 GN=Hadhb PE=1 SV=1	13	18	13	51.4	1838.3	2266.9	2626	705.3	374.1	349.3
High	P47962	60S ribosomal protein L5 OS=Mus musculus OX=10090 GN=Rpl5 PE=1 SV=3	12	19	12	34.4	2889.6	3078.7	3641.6	428.1	643.9	469.6
High	Q8K224	RNA cytidine acetyltransferase OS=Mus musculus OX=10090 GN=Nat10 PE=1 SV=1	12	14	12	115.3	1952.8	1731.5	2222.5	140.5	305.9	171.2
High	Q8BHL3	TBC1 domain family member 10B OS=Mus musculus OX=10090 GN=Tbc1d10b PE=1 SV=2	10	20	10	87.2	1782.3	2414.9	2377.4	262.6	818.7	152.4
High	P26039	Talin-1 OS=Mus musculus OX=10090 GN=Tln1 PE=1 SV=2	14	15	14	269.7	194	275.4	581.9	384.1	300.3	590.7
High	P14131	40S ribosomal protein S16 OS=Mus musculus OX=10090 GN=Rps16 PE=1 SV=4	13	27	13	16.4	5491.3	7763	11251.4	570.9	895.7	331.3
High	P86048	60S ribosomal protein L10-like OS=Mus musculus OX=10090 GN=Rpl10l PE=2 SV=1	11	20	1	24.5
High	P60335	Poly(rC)-binding protein 1 OS=Mus musculus OX=10090 GN=Pcbp1 PE=1 SV=1	11	17	7	37.5	832.2	1331.6	1687.5	256.1	349.8	382.2
High	Q52KI8	Serine/arginine repetitive matrix protein 1 OS=Mus musculus OX=10090 GN=Srrm1 PE=1 SV=2	13	22	13	106.8	2863	2295.9	2438.6	175.4	613.2	82
High	Q9Z315	U4/U6.U5 tri-snRNP-associated protein 1 OS=Mus musculus OX=10090 GN=Sart1 PE=1 SV=1	10	12	10	90.8	1339.8	992.5	1429	115.2	77.5	48.5
High	P41105	60S ribosomal protein L28 OS=Mus musculus OX=10090 GN=Rpl28 PE=1 SV=2	8	24	8	15.7	7183.1	8184.1	10897.4	202.7	1051	129.7
High	P47911	60S ribosomal protein L6 OS=Mus musculus OX=10090 GN=Rpl6 PE=1 SV=3	15	27	15	33.5	2460	3153.3	4473.6	4777.1	5195.9	6399.7
High	P12970	60S ribosomal protein L7a OS=Mus musculus OX=10090 GN=Rpl7a PE=1 SV=2	8	12	8	30	1070.5	1008.1	1779.8	456.7	623.6	893.1
High	Q8BMS1	Trifunctional enzyme subunit alpha, mitochondrial OS=Mus musculus OX=10090 GN=Hadha PE=1 SV=1	11	13	11	82.6	1061.9	1254.7	1628.8	344.2	337.1	373.2
High	P08113	Endoplasmin OS=Mus musculus OX=10090 GN=Hsp90b1 PE=1 SV=2	10	14	9	92.4	337.2	382.7	1141.3	775.3	800.8	1369.6
High	P62717	60S ribosomal protein L18a OS=Mus musculus OX=10090 GN=Rpl18a PE=1 SV=1	8	18	8	20.7	341.5	436.7	569.9	4048	5884.8	1466.8
High	P14115	60S ribosomal protein L27a OS=Mus musculus OX=10090 GN=Rpl27a PE=1 SV=5	10	19	10	16.6	5325.1	5468.1	8179.2	87.2	68.7	119.5
High	Q9CPT5	Nucleolar protein 16 OS=Mus musculus OX=10090 GN=Nop16 PE=1 SV=1	9	16	9	21.1	3133.4	3432.1	4309.9	65.1	45.7	49.6
High	P14733	Lamin-B1 OS=Mus musculus OX=10090 GN=Lmnb1 PE=1 SV=3	13	15	12	66.7	199	227.9	554.1	83.3	103.6	202.9
High	P07356	Annexin A2 OS=Mus musculus OX=10090 GN=Anxa2 PE=1 SV=2	10	15	10	38.7	1171.9	587.3	1980.9	1216.1	1273.5	1542.1
High	P05064	Fructose-bisphosphate aldolase A OS=Mus musculus OX=10090 GN=Aldoa PE=1 SV=2	10	14	10	39.3	547	370.6	940.2	997.1	623.2	2044.7
High	P02088	Hemoglobin subunit beta-1 OS=Mus musculus OX=10090 GN=Hbb-b1 PE=1 SV=2	7	18	7	15.8	2198.5	2483.8	5873.5	292.2	340.9	756.8
High	Q3UV17	Keratin, type II cytoskeletal 2 oral OS=Mus musculus OX=10090 GN=Krt76 PE=1 SV=1	12	30	3	62.8	1229.8	1225.1	1292.7	1214	571.4	583
High	P62281	40S ribosomal protein S11 OS=Mus musculus OX=10090 GN=Rps11 PE=1 SV=3	11	23	11	18.4	4309.9	6387.4	8969	269.3	380.4	350
High	P61358	60S ribosomal protein L27 OS=Mus musculus OX=10090 GN=Rpl27 PE=1 SV=2	10	23	10	15.8	4336.1	3550.5	4811.3	2617.6	1556.4	945.9
High	Q9D824	Pre-mRNA 3'-end-processing factor FIP1 OS=Mus musculus OX=10090 GN=Fip1l1 PE=1 SV=1	8	12	8	64.9	833.3	890.9	1246	74.8	73.5	28.9
High	Q9CQ19	Myosin regulatory light polypeptide 9 OS=Mus musculus OX=10090 GN=Myl9 PE=1 SV=3	7	17	1	19.8
High	Q99KV1	DnaJ homolog subfamily B member 11 OS=Mus musculus OX=10090 GN=Dnajb11 PE=1 SV=1	8	12	8	40.5	637.5	607.4	810.1	1116.3	770.3	660.9
High	P61161	Actin-related protein 2 OS=Mus musculus OX=10090 GN=Actr2 PE=1 SV=1	7	12	7	44.7	226.1	1020.6	3159.2	195.7	228.7	284.6
High	Q06890	Clusterin OS=Mus musculus OX=10090 GN=Clu PE=1 SV=1	10	11	10	51.6	644.2	668.6	873.2	657.6	693.2	622.1
High	P48962	ADP/ATP translocase 1 OS=Mus musculus OX=10090 GN=Slc25a4 PE=1 SV=4	11	18	5	32.9	226.1	258.3	351.7	264.1	254.2	265.2
High	P16460	Argininosuccinate synthase OS=Mus musculus OX=10090 GN=Ass1 PE=1 SV=1	12	15	12	46.6	1198	2714.5	2538.9	131.2	347.3	245.6
High	P28740	Kinesin-like protein KIF2A OS=Mus musculus OX=10090 GN=Kif2a PE=1 SV=2	11	15	9	79.7	919.6	1080.1	1321.3	101.3	94.4	78.4
High	Q3UL36	Arginine and glutamate-rich protein 1 OS=Mus musculus OX=10090 GN=Arglu1 PE=1 SV=2	16	35	15	32.9	3814.9	6340.6	6266.2	1249.8	846.2	270.5
High	Q6NXH9	Keratin, type II cytoskeletal 73 OS=Mus musculus OX=10090 GN=Krt73 PE=1 SV=1	8	27	1	58.9	59.3	200	53.6	108.3	2.8	8.9
High	Q9D883	Splicing factor U2AF 35 kDa subunit OS=Mus musculus OX=10090 GN=U2af1 PE=1 SV=4	7	22	5	27.8	1092.1	1615.4	2037.5	56.6	110.2	24.5
High	P01867	Immunoglobulin heavy constant gamma 2B OS=Mus musculus OX=10090 GN=Ighg2b PE=1 SV=3	9	18	9	44.2	2387	2105.9	2396.5	2027.4	2419.4	1963.6
High	P47915	60S ribosomal protein L29 OS=Mus musculus OX=10090 GN=Rpl29 PE=1 SV=2	9	26	9	17.6	9122.7	8605.8	11512.9	142.2	226.4	97.3
High	Q68FD5	Clathrin heavy chain 1 OS=Mus musculus OX=10090 GN=Cltc PE=1 SV=3	14	16	14	191.4	276.9	380.8	1016.1	306.5	374.9	448.1
High	P01644	Ig kappa chain V-V region HP R16.7 OS=Mus musculus OX=10090 PE=1 SV=1	6	15	6	11.9	1258.4	1212.4	1302.1	1061.6	992.3	991.9
High	Q6PB66	Leucine-rich PPR motif-containing protein, mitochondrial OS=Mus musculus OX=10090 GN=Lrpprc PE=1 SV=2	12	13	12	156.5	896	1030.6	1469.5	431.2	563.7	403.8
High	Q9D7G0	Ribose-phosphate pyrophosphokinase 1 OS=Mus musculus OX=10090 GN=Prps1 PE=1 SV=4	9	10	6	34.8	668	964.9	994.9	91.2	157.5	100.9
High	Q8BVY0	Ribosomal L1 domain-containing protein 1 OS=Mus musculus OX=10090 GN=Rsl1d1 PE=1 SV=1	10	12	10	50.4	1858.8	1452.4	2141.6	88.3	287.9	117.5
High	P0DP26	Calmodulin-1 OS=Mus musculus OX=10090 GN=Calm1 PE=1 SV=1	7	12	7	16.8	95.7	819.9	2057.1	172.1	1080.1	857.4
High	Q9D0G0	28S ribosomal protein S30, mitochondrial OS=Mus musculus OX=10090 GN=Mrps30 PE=1 SV=1	7	12	7	49.9	803.9	665.2	767.4	588.3	1376.7	479.3
High	Q02105	Complement C1q subcomponent subunit C OS=Mus musculus OX=10090 GN=C1qc PE=1 SV=2	7	28	7	26	3080.8	3421.2	3664.7	2494.1	2518.6	2066
High	P62911	60S ribosomal protein L32 OS=Mus musculus OX=10090 GN=Rpl32 PE=1 SV=2	9	21	9	15.9	4055	4282.4	5116.3	462.3	808.9	129.8
High	P80315	T-complex protein 1 subunit delta OS=Mus musculus OX=10090 GN=Cct4 PE=1 SV=3	9	12	9	58	462.5	567.1	797.6	178.3	239.7	304.6
High	Q6P542	ATP-binding cassette sub-family F member 1 OS=Mus musculus OX=10090 GN=Abcf1 PE=1 SV=1	10	11	10	94.9	330.4	361.3	510.9	150.4	147.9	129.3
High	Q01853	Transitional endoplasmic reticulum ATPase OS=Mus musculus OX=10090 GN=Vcp PE=1 SV=4	10	12	10	89.3	263.4	361.7	1244.5	353.7	375.8	635.3
High	Q569Z5	Probable ATP-dependent RNA helicase DDX46 OS=Mus musculus OX=10090 GN=Ddx46 PE=1 SV=2	11	11	11	117.4	158.6	468	719.1	124.7	89	144
High	P06151	L-lactate dehydrogenase A chain OS=Mus musculus OX=10090 GN=Ldha PE=1 SV=3	8	13	8	36.5	749.5	347.2	695.1	1747.7	869.6	3137.1
High	Q99ME9	GTP-binding protein 4 OS=Mus musculus OX=10090 GN=Gtpbp4 PE=1 SV=3	12	15	12	74.1	1607	2077.9	2997.3	80.9	157.1	134.1
High	Q91ZW3	SWI/SNF-related matrix-associated actin-dependent regulator of chromatin subfamily A member 5 OS=Mus musculus OX=10090 GN=Smarca5 PE=1 SV=1	10	11	10	121.6	1092.1	1062.4	1255.1	218.7	378.6	351.3
High	P01865	Ig gamma-2A chain C region, membrane-bound form OS=Mus musculus OX=10090 GN=Igh-1a PE=1 SV=3	7	18	7	43.9	2043.3	1862.8	2079.3	1861.7	2747.4	2497.5
High	Q8CIE6	Coatomer subunit alpha OS=Mus musculus OX=10090 GN=Copa PE=1 SV=2	12	15	12	138.3	452.6	520.5	668.3	571.5	634.4	659.1
High	P62960	Y-box-binding protein 1 OS=Mus musculus OX=10090 GN=Ybx1 PE=1 SV=3	6	10	5	35.7	707.9	860.4	861.3	10.7	16.6
High	P60122	RuvB-like 1 OS=Mus musculus OX=10090 GN=Ruvbl1 PE=1 SV=1	7	9	7	50.2	640.9	783.4	964	207.2	306.8	257.1
High	P04104	Keratin, type II cytoskeletal 1 OS=Mus musculus OX=10090 GN=Krt1 PE=1 SV=4	7	24	2	65.6	1597	814.4	1469.1	1874.9	1006.3	929.3
High	P63101	14-3-3 protein zeta/delta OS=Mus musculus OX=10090 GN=Ywhaz PE=1 SV=1	9	17	5	27.8	179.2	201	441.8	446.1	257.7	787.2
High	Q6URW6	Myosin-14 OS=Mus musculus OX=10090 GN=Myh14 PE=1 SV=1	9	25	1	228.4	9.7	7.4	27	11	31.1	26.5
High	Q6ZWV7	60S ribosomal protein L35 OS=Mus musculus OX=10090 GN=Rpl35 PE=1 SV=1	10	35	10	14.5	7291.9	7815.6	10322.1	165.5	229.4	186.2
High	P11247	Myeloperoxidase OS=Mus musculus OX=10090 GN=Mpo PE=1 SV=2	12	14	12	81.1	246.6	284.1	352.9	196.6	1423.4	2421.6
High	P84099	60S ribosomal protein L19 OS=Mus musculus OX=10090 GN=Rpl19 PE=1 SV=1	11	20	11	23.5	2277	3287.4	3524.9	270.1	2516	160
High	Q8VEK3	Heterogeneous nuclear ribonucleoprotein U OS=Mus musculus OX=10090 GN=Hnrnpu PE=1 SV=1	13	15	13	87.9	2125.8	2068.5	2832.8	609.2	895.9	735.2
High	Q91VR5	ATP-dependent RNA helicase DDX1 OS=Mus musculus OX=10090 GN=Ddx1 PE=1 SV=1	10	12	10	82.4	608.5	739.5	1014.4	196.2	247.5	229.8
High	Q6IFZ6	Keratin, type II cytoskeletal 1b OS=Mus musculus OX=10090 GN=Krt77 PE=1 SV=1	8	21	3	61.3	881.9	237.8	662.1	436.7	300.4	375
High	O70126	Aurora kinase B OS=Mus musculus OX=10090 GN=Aurkb PE=1 SV=2	6	9	6	39.4	604.7	740.3	848	46.3	91.8	71.9
High	Q8BG17	Nucleolar protein 12 OS=Mus musculus OX=10090 GN=Nol12 PE=1 SV=1	9	16	9	25.3	3227.7	2451	3402	37	28.4	26.7
High	Q8K1B8	Fermitin family homolog 3 OS=Mus musculus OX=10090 GN=Fermt3 PE=1 SV=1	9	12	9	75.6	336.9	379.9	608.1	748.1	534.5	529.7
High	P03987	Ig gamma-3 chain C region OS=Mus musculus OX=10090 PE=1 SV=2	8	16	8	43.9	1642	1700.1	1865.8	1791.3	1987.1	1676.4
High	P35278	Ras-related protein Rab-5C OS=Mus musculus OX=10090 GN=Rab5c PE=1 SV=2	7	10	6	23.4	489.3	512.2	656.7	396.5	345.6	290.5
High	Q5SUF2	Luc7-like protein 3 OS=Mus musculus OX=10090 GN=Luc7l3 PE=1 SV=1	8	11	8	51.4	663	1843.8	1929.3	81	91.5	86.1
High	Q8CG16	Complement C1r-A subcomponent OS=Mus musculus OX=10090 GN=C1ra PE=1 SV=1	10	12	10	80	372.5	377.7	427.4	423.4	551	467
High	P01942	Hemoglobin subunit alpha OS=Mus musculus OX=10090 GN=Hba PE=1 SV=2	8	17	8	15.1	2117.2	2262.2	4388.7	288.1	271.9	662
High	Q8BP47	Asparagine--tRNA ligase, cytoplasmic OS=Mus musculus OX=10090 GN=NARS1 PE=1 SV=2	9	11	9	64.2	696.4	858.1	1184.4	174.1	211.2	180.7
High	Q61990	Poly(rC)-binding protein 2 OS=Mus musculus OX=10090 GN=Pcbp2 PE=1 SV=1	8	13	4	38.2	503.9	605.8	792.2	230.4	350.8	260.6
High	P80318	T-complex protein 1 subunit gamma OS=Mus musculus OX=10090 GN=Cct3 PE=1 SV=1	11	15	11	60.6	1123.8	1411	1837.1	435.2	627.9	680.5
High	Q99JR1	Sideroflexin-1 OS=Mus musculus OX=10090 GN=Sfxn1 PE=1 SV=3	8	9	8	35.6	487	710.4	892.8	174.8	186.8	147.8
High	P62900	60S ribosomal protein L31 OS=Mus musculus OX=10090 GN=Rpl31 PE=1 SV=1	10	19	10	14.5	2907.9	2926.5	4280	1648.2	2134	581.8
High	Q9WV32	Actin-related protein 2/3 complex subunit 1B OS=Mus musculus OX=10090 GN=Arpc1b PE=1 SV=4	7	10	7	41	225.7	530.2	1549.7	110.4	311.8	292.3
High	P80314	T-complex protein 1 subunit beta OS=Mus musculus OX=10090 GN=Cct2 PE=1 SV=4	9	9	9	57.4	372.7	470.3	979.4	268.4	392.7	437.1
High	Q8CGC7	Bifunctional glutamate/proline--tRNA ligase OS=Mus musculus OX=10090 GN=Eprs1 PE=1 SV=4	10	10	10	170	800.7	1060.3	1451.8	295.6	523.2	429.7
High	Q9D945	Protein LLP homolog OS=Mus musculus OX=10090 GN=Llph PE=1 SV=1	6	14	6	15.4	1552	1856.5	3264.2	65.2	86.5	73.3
High	Q8JZX4	Splicing factor 45 OS=Mus musculus OX=10090 GN=Rbm17 PE=1 SV=1	10	12	10	45.3	1600.6	1056.4	1988.1	77.2	76.5	89.9
High	P15089	Mast cell carboxypeptidase A OS=Mus musculus OX=10090 GN=Cpa3 PE=2 SV=1	11	12	11	48.8	138	158.6	184.1	2151.7	769.2	2666.1
High	Q9CZN7	Serine hydroxymethyltransferase, mitochondrial OS=Mus musculus OX=10090 GN=Shmt2 PE=1 SV=1	11	12	11	55.7	1212.1	939	1367	404.1	591.6	472.1
High	O35129	Prohibitin-2 OS=Mus musculus OX=10090 GN=Phb2 PE=1 SV=1	8	13	8	33.3	728	876.1	1705.6	299.2	345.3	463.7
High	Q9QUI0	Transforming protein RhoA OS=Mus musculus OX=10090 GN=Rhoa PE=1 SV=1	6	9	6	21.8	719.6	1098.1	1267.9	604.9	315.7	368.4
High	Q6P5F9	Exportin-1 OS=Mus musculus OX=10090 GN=Xpo1 PE=1 SV=1	5	7	5	123	216.2	309.2	410.5	77.3	97.4	83.8
High	P13020	Gelsolin OS=Mus musculus OX=10090 GN=Gsn PE=1 SV=3	7	7	7	85.9	71.9	489.3	1227.1	230.8	174.9	406.6
High	Q6A068	Cell division cycle 5-like protein OS=Mus musculus OX=10090 GN=Cdc5l PE=1 SV=2	10	13	10	92.1	1746.9	1784.1	2236.8	40.8	27.6	42.6
High	P46471	26S proteasome regulatory subunit 7 OS=Mus musculus OX=10090 GN=Psmc2 PE=1 SV=5	8	12	8	48.6	370.8	452.8	675.1	153.2	194.6	352.1
High	Q99LF4	RNA-splicing ligase RtcB homolog OS=Mus musculus OX=10090 GN=Rtcb PE=1 SV=1	7	9	7	55.2	498.7	681.7	1063.7	204.8	242.8	233
High	Q60930	Voltage-dependent anion-selective channel protein 2 OS=Mus musculus OX=10090 GN=Vdac2 PE=1 SV=2	9	11	9	31.7	563.5	696.2	1202.7	232.2	351.7	294.4
High	Q64152	Transcription factor BTF3 OS=Mus musculus OX=10090 GN=Btf3 PE=1 SV=3	8	14	6	22	425.6	314.7	405.6	53.6	428.2	698.7
High	Q9ERU9	E3 SUMO-protein ligase RanBP2 OS=Mus musculus OX=10090 GN=Ranbp2 PE=1 SV=2	10	11	10	340.9	400.7	376.5	520.5	67.9	96.4	83
High	P83882	60S ribosomal protein L36a OS=Mus musculus OX=10090 GN=Rpl36a PE=3 SV=2	7	21	7	12.4	5736.7	7126.9	10283.7	243.8	179.1	186.1
High	Q91VR2	ATP synthase subunit gamma, mitochondrial OS=Mus musculus OX=10090 GN=Atp5f1c PE=1 SV=1	9	17	9	32.9	1399.3	1696.2	2187.3	525.2	695.9	378.7
High	Q9JJF3	Ribosomal oxygenase 1 OS=Mus musculus OX=10090 GN=Riox1 PE=1 SV=2	11	17	11	67.5	2404.9	1743.8	2303.6	31.7	48	36
High	P08882	Granzyme C OS=Mus musculus OX=10090 GN=Gzmc PE=1 SV=1	7	11	6	27.3	49.9	158.9	101.1	2197.9	831	1931
High	Q5SSI6	U3 small nucleolar RNA-associated protein 18 homolog OS=Mus musculus OX=10090 GN=Utp18 PE=1 SV=1	7	10	7	61.2	364.6	389.4	395.3	215.2	447.8	743.9
High	Q640M1	U3 small nucleolar RNA-associated protein 14 homolog A OS=Mus musculus OX=10090 GN=Utp14a PE=1 SV=1	8	13	8	87.2	1251.1	869.3	1075.6	12.9	20.3	16.1
High	P42932	T-complex protein 1 subunit theta OS=Mus musculus OX=10090 GN=Cct8 PE=1 SV=3	9	9	9	59.5	361.9	522.1	1080.7	241.7	379.2	449.7
High	C0HKD8	Microfibrillar-associated protein 1A OS=Mus musculus OX=10090 GN=Mfap1a PE=1 SV=1	10	11	10	51.9	607.9	1020.3	1218.6	25.1	35.9	44.2
High	P17742	Peptidyl-prolyl cis-trans isomerase A OS=Mus musculus OX=10090 GN=Ppia PE=1 SV=2	10	14	10	18	403.8	449.9	1594.4	623.9	433.1	1307.4
High	P01843	Ig lambda-1 chain C region OS=Mus musculus OX=10090 PE=1 SV=1	3	10	3	11.6	495.9	533.7	592.7	485.2	448.2	424.7
High	Q9EQ61	Pescadillo homolog OS=Mus musculus OX=10090 GN=Pes1 PE=1 SV=1	9	11	9	67.8	1461.5	1511.2	1715.6	205.5	124.7	166.7
High	Q91VC3	Eukaryotic initiation factor 4A-III OS=Mus musculus OX=10090 GN=Eif4a3 PE=1 SV=3	8	9	6	46.8	710.6	688.8	797.5	210.4	270.8	230.4
High	P08752	Guanine nucleotide-binding protein G(i) subunit alpha-2 OS=Mus musculus OX=10090 GN=Gnai2 PE=1 SV=5	7	10	5	40.5	244.1	478.2	2047.5	353.7	326.8	320.8
High	Q8BMA6	Signal recognition particle subunit SRP68 OS=Mus musculus OX=10090 GN=Srp68 PE=1 SV=2	10	11	10	70.5	650.2	736.8	780.7	356.8	436.2	253.3
High	Q5U4C3	Splicing factor, arginine/serine-rich 19 OS=Mus musculus OX=10090 GN=Scaf1 PE=1 SV=1	6	7	6	133.8	395.3	322.1	454.3	3.3	19.6	8.5
High	Q9WVK4	EH domain-containing protein 1 OS=Mus musculus OX=10090 GN=Ehd1 PE=1 SV=1	9	11	8	60.6	683.7	1024.9	1282	132.6	109.5	122.2
High	Q60931	Voltage-dependent anion-selective channel protein 3 OS=Mus musculus OX=10090 GN=Vdac3 PE=1 SV=1	7	11	7	30.7	780.5	975.4	1480.5	255.1	275.2	347.9
High	Q9D0E1	Heterogeneous nuclear ribonucleoprotein M OS=Mus musculus OX=10090 GN=Hnrnpm PE=1 SV=3	9	10	9	77.6	834.5	536.4	876.1	139.4	112.5	280.2
High	P17918	Proliferating cell nuclear antigen OS=Mus musculus OX=10090 GN=Pcna PE=1 SV=2	8	11	8	28.8	1070	1406.2	1720.2	263.7	341.7	303.5
High	O09172	Glutamate--cysteine ligase regulatory subunit OS=Mus musculus OX=10090 GN=Gclm PE=1 SV=1	6	9	6	30.5	877.1	1314.3	1413.2	68.1	88.4	96.3
High	P08249	Malate dehydrogenase, mitochondrial OS=Mus musculus OX=10090 GN=Mdh2 PE=1 SV=3	7	9	7	35.6	147.1	165	553.2	133.7	103	357.5
High	Q9DCG9	Multifunctional methyltransferase subunit TRM112-like protein OS=Mus musculus OX=10090 GN=Trmt112 PE=1 SV=1	4	13	4	14.1	1546.8	1586	1801.9	55.2	58.1	56.4
High	Q99LH1	Nucleolar GTP-binding protein 2 OS=Mus musculus OX=10090 GN=Gnl2 PE=1 SV=2	7	9	7	83.3	484.5	443.8	815.4	10.7	9.3	16.2
High	P47738	Aldehyde dehydrogenase, mitochondrial OS=Mus musculus OX=10090 GN=Aldh2 PE=1 SV=1	8	10	8	56.5	498.1	768.4	1050.5	202	200.5	300.8
High	Q9WV92	Band 4.1-like protein 3 OS=Mus musculus OX=10090 GN=Epb41l3 PE=1 SV=1	8	10	6	103.3	763.5	1123.1	887.4	48.3	111.3	88.6
High	Q8CG14	Complement C1s-A subcomponent OS=Mus musculus OX=10090 GN=C1sa PE=2 SV=2	6	8	6	76.8	317.2	340.3	386.9	394.9	482.3	443.1
High	Q9D0D4	Probable dimethyladenosine transferase OS=Mus musculus OX=10090 GN=Dimt1 PE=2 SV=1	8	11	8	35.3	1493.1	1433.5	1744.6	199.2	210.7	192.7
High	Q3U1J4	DNA damage-binding protein 1 OS=Mus musculus OX=10090 GN=Ddb1 PE=1 SV=2	8	11	8	126.8	882.5	1028.2	1387.7	170.8	191.3	327.7
High	Q8K4L3	Supervillin OS=Mus musculus OX=10090 GN=Svil PE=1 SV=1	9	11	9	243	93.1	370.6	876.7	101.1	101	93.3
High	P61205	ADP-ribosylation factor 3 OS=Mus musculus OX=10090 GN=Arf3 PE=2 SV=2	6	10	5	20.6	301.2	364.6	417.7	246.3	218.5	208.3
High	Q6P5B0	RRP12-like protein OS=Mus musculus OX=10090 GN=Rrp12 PE=1 SV=1	9	11	9	143	1542.8	1261	2100.5	45	45.1	44.1
High	P62849	40S ribosomal protein S24 OS=Mus musculus OX=10090 GN=Rps24 PE=1 SV=1	4	20	4	15.4	2862.3	2915.4	3788	987	2499	200.7
High	P29341	Polyadenylate-binding protein 1 OS=Mus musculus OX=10090 GN=Pabpc1 PE=1 SV=2	9	10	9	70.6	232.7	471.5	643.5	317	101.6	401.6
High	Q80UP3	Diacylglycerol kinase zeta OS=Mus musculus OX=10090 GN=Dgkz PE=1 SV=2	8	10	8	104	558.9	443.2	568	216.8	797.3	526.4
High	P67778	Prohibitin 1 OS=Mus musculus OX=10090 GN=Phb1 PE=1 SV=1	7	8	7	29.8	301.6	313.4	707.4	153.3	133.4	201.4
High	Q923D5	WW domain-binding protein 11 OS=Mus musculus OX=10090 GN=Wbp11 PE=1 SV=2	7	10	7	69.8	1273.9	1145.7	1469.3	76.6	47.1	117.4
High	Q91YR7	Pre-mRNA-processing factor 6 OS=Mus musculus OX=10090 GN=Prpf6 PE=1 SV=1	7	10	7	106.7	505	499.8	584.7	158.3	207.2	162.3
High	P80317	T-complex protein 1 subunit zeta OS=Mus musculus OX=10090 GN=Cct6a PE=1 SV=3	9	11	9	58	667	787.5	1198.3	324.1	464.4	553.3
High	P01878	Ig alpha chain C region OS=Mus musculus OX=10090 PE=1 SV=1	7	7	7	36.9	480	395.1	484.5	372.7	429.2	428.6
High	B2RY56	RNA-binding protein 25 OS=Mus musculus OX=10090 GN=Rbm25 PE=1 SV=2	11	15	11	99.5	571.5	587.2	670.2	1276.9	595.1	1400.1
High	Q9Z1Q5	Chloride intracellular channel protein 1 OS=Mus musculus OX=10090 GN=Clic1 PE=1 SV=3	8	12	8	27	260.9	287.9	642.8	787.1	369.9	871.5
High	Q8CG48	Structural maintenance of chromosomes protein 2 OS=Mus musculus OX=10090 GN=Smc2 PE=1 SV=2	10	10	10	134.2	428.5	693.4	882.8	130.7	214.5	420.8
High	P24788	Cyclin-dependent kinase 11B OS=Mus musculus OX=10090 GN=Cdk11b PE=1 SV=2	10	14	10	91.5	1229.7	1755.1	2775.8	86.8	147.1	95.2
High	Q60932	Voltage-dependent anion-selective channel protein 1 OS=Mus musculus OX=10090 GN=Vdac1 PE=1 SV=3	7	9	7	32.3	493.1	584	1321	295.5	226.4	448
High	P62918	60S ribosomal protein L8 OS=Mus musculus OX=10090 GN=Rpl8 PE=1 SV=2	11	16	11	28	1392.9	1757.5	2618.1	2607.9	1702.6	675.8
High	Q99M74	Keratin, type II cuticular Hb2 OS=Mus musculus OX=10090 GN=Krt82 PE=1 SV=2	6	23	3	57.1	457.1	21.8	43.5	20.9	14.5	5843.1
High	Q05144	Ras-related C3 botulinum toxin substrate 2 OS=Mus musculus OX=10090 GN=Rac2 PE=1 SV=1	6	13	5	21.4	726.1	1069	1316.2	603.9	442.5	508.1
High	Q6IME9	Keratin, type II cytoskeletal 72 OS=Mus musculus OX=10090 GN=Krt72 PE=3 SV=1	6	12	1	56.7	47.4	42.7	53.9	72.5	30.2	22.4
High	Q921M3	Splicing factor 3B subunit 3 OS=Mus musculus OX=10090 GN=Sf3b3 PE=1 SV=1	8	9	8	135.5	737.5	628.2	1027	152.8	164.5	260.5
High	Q9Z0N1	Eukaryotic translation initiation factor 2 subunit 3, X-linked OS=Mus musculus OX=10090 GN=Eif2s3x PE=1 SV=2	8	11	2	51	83.1	90.4	120.9	99.2	72.7	81.7
High	P27773	Protein disulfide-isomerase A3 OS=Mus musculus OX=10090 GN=Pdia3 PE=1 SV=2	6	9	6	56.6	119.4	112.8	442.9	271.6	163.8	478
High	Q6P4T2	U5 small nuclear ribonucleoprotein 200 kDa helicase OS=Mus musculus OX=10090 GN=Snrnp200 PE=1 SV=1	9	9	9	244.4	364.5	410.8	535.2	107.9	109.4	160
High	Q99KC8	von Willebrand factor A domain-containing protein 5A OS=Mus musculus OX=10090 GN=Vwa5a PE=1 SV=2	7	8	7	87.1	54	71.1	116.8	808.5	138.7	723.7
High	Q6ZWX6	Eukaryotic translation initiation factor 2 subunit 1 OS=Mus musculus OX=10090 GN=Eif2s1 PE=1 SV=3	6	8	6	36.1	404.4	480.3	619.7	376.8	231.5	366.1
High	O35226	26S proteasome non-ATPase regulatory subunit 4 OS=Mus musculus OX=10090 GN=Psmd4 PE=1 SV=1	7	9	7	40.7	1088	1242.9	1260	195.9	447.2	230.2
High	Q9WUM5	Succinate--CoA ligase [ADP/GDP-forming] subunit alpha, mitochondrial OS=Mus musculus OX=10090 GN=Suclg1 PE=1 SV=4	7	8	7	36.1	1202.8	1465.9	1769.4	294.5	261.6	140.3
High	Q9JHU4	Cytoplasmic dynein 1 heavy chain 1 OS=Mus musculus OX=10090 GN=Dync1h1 PE=1 SV=2	9	10	9	531.7	178.2	279.7	403.3	167.9	221.9	285.7
High	Q91YU8	Suppressor of SWI4 1 homolog OS=Mus musculus OX=10090 GN=Ppan PE=1 SV=2	9	14	9	52.7	965.4	855.6	976.6	409.3	1509.7	1573.3
High	P63037	DnaJ homolog subfamily A member 1 OS=Mus musculus OX=10090 GN=Dnaja1 PE=1 SV=1	5	7	5	44.8	641.9	794.8	1046.6	224.7	494.5	311.9
High	Q91VE6	MKI67 FHA domain-interacting nucleolar phosphoprotein OS=Mus musculus OX=10090 GN=Nifk PE=1 SV=1	6	13	6	36.2	1178.1	1311.2	1595.6	59.6	61.1	65.3
High	P14106	Complement C1q subcomponent subunit B OS=Mus musculus OX=10090 GN=C1qb PE=1 SV=2	6	22	6	26.7	1924	1925.1	2210.6	1597.4	1849.8	1402.5
High	Q5HZH2	18S rRNA aminocarboxypropyltransferase OS=Mus musculus OX=10090 GN=Tsr3 PE=1 SV=1	5	6	5	35.3	290.7	392.6	467.1	14.2	16.6	23.5
High	Q9CVB6	Actin-related protein 2/3 complex subunit 2 OS=Mus musculus OX=10090 GN=Arpc2 PE=1 SV=3	8	10	8	34.3	130.5	772.6	2401.6	119.4	106.9	129.6
High	Q9CYH2	Peroxiredoxin-like 2A OS=Mus musculus OX=10090 GN=Prxl2a PE=1 SV=2	5	9	5	24.4	552.2	616.9	929.5	125.4	40	99.3
High	P10630	Eukaryotic initiation factor 4A-II OS=Mus musculus OX=10090 GN=Eif4a2 PE=1 SV=2	8	11	1	46.4	60.9	67.8	109.1	50.6	80.8	54.6
High	P53657	Pyruvate kinase PKLR OS=Mus musculus OX=10090 GN=Pklr PE=1 SV=1	6	8	5	62.3	155.2	129.2	254	17.4	10.4	59
High	P67984	60S ribosomal protein L22 OS=Mus musculus OX=10090 GN=Rpl22 PE=1 SV=2	5	14	4	14.8	841.5	1234.7	1174.8	1340	1162.8	778.4
High	P40142	Transketolase OS=Mus musculus OX=10090 GN=Tkt PE=1 SV=1	8	10	8	67.6	799.9	767.7	1672.6	451.7	507.2	1171.1
High	Q8C6B9	Active regulator of SIRT1 OS=Mus musculus OX=10090 GN=Rps19bp1 PE=1 SV=1	4	5	4	16	325.3	321.8	560.7	14.7	11.6	10.4
High	Q9CS42	Ribose-phosphate pyrophosphokinase 2 OS=Mus musculus OX=10090 GN=Prps2 PE=1 SV=4	5	6	2	34.8	127.8	179.5	193.2	45.3	52	43.8
High	P97376	Protein FRG1 OS=Mus musculus OX=10090 GN=Frg1 PE=1 SV=2	5	8	5	29.1	787.3	872.7	870.2	67.6	254.5	77.7
High	P19253	60S ribosomal protein L13a OS=Mus musculus OX=10090 GN=Rpl13a PE=1 SV=4	6	11	6	23.4	770.3	975.5	1460.3	643.3	3801.6	195.8
High	P07758	Alpha-1-antitrypsin 1-1 OS=Mus musculus OX=10090 GN=Serpina1a PE=1 SV=4	8	9	4	46	793.2	853	1218.7	821.6	743.6	689.3
High	P07744	Keratin, type II cytoskeletal 4 OS=Mus musculus OX=10090 GN=Krt4 PE=1 SV=2	8	21	1	56.2	20.6	31.7	18.5	37.2	4.3
High	O09167	60S ribosomal protein L21 OS=Mus musculus OX=10090 GN=Rpl21 PE=1 SV=3	9	16	9	18.6	2737.9	2917.2	4161.8	1737.6	313.7	359.2
High	Q9CR62	Mitochondrial 2-oxoglutarate/malate carrier protein OS=Mus musculus OX=10090 GN=Slc25a11 PE=1 SV=3	7	7	7	34.1	285.5	382.7	472.6	160.4	153.3	171.1
High	P01029	Complement C4-B OS=Mus musculus OX=10090 GN=C4b PE=1 SV=3	8	13	8	192.8	907.2	1073.9	1220.2	1164.2	1646.9	1080.8
High	P63325	40S ribosomal protein S10 OS=Mus musculus OX=10090 GN=Rps10 PE=1 SV=1	8	13	7	18.9	1155.8	1548.8	2074.9	594.4	234.7	519.5
High	P42225	Signal transducer and activator of transcription 1 OS=Mus musculus OX=10090 GN=Stat1 PE=1 SV=1	7	8	7	87.1	254.1	567	482.5	131.5	416.1	152.7
High	Q9Z0N2	Eukaryotic translation initiation factor 2 subunit 3, Y-linked OS=Mus musculus OX=10090 GN=Eif2s3y PE=1 SV=2	7	10	1	51.1	29.9	29.5	31.8	15.5	10.8	18.8
High	P18528	Ig heavy chain V region 6.96 OS=Mus musculus OX=10090 PE=4 SV=1	3	8	1	11	561	523.2	594.8	495.4	540.1	439.3
High	P18760	Cofilin-1 OS=Mus musculus OX=10090 GN=Cfl1 PE=1 SV=3	7	16	6	18.5	1327	1555.1	2205.3	1457	1132.6	1395.3
High	O35286	ATP-dependent RNA helicase DHX15 OS=Mus musculus OX=10090 GN=Dhx15 PE=1 SV=2	7	9	7	90.9	681	550.8	915.8	191.7	173.1	205.9
High	P35700	Peroxiredoxin-1 OS=Mus musculus OX=10090 GN=Prdx1 PE=1 SV=1	8	10	8	22.2	512.2	645.1	1039.7	662.7	766.1	867.6
High	Q6ZQ38	Cullin-associated NEDD8-dissociated protein 1 OS=Mus musculus OX=10090 GN=Cand1 PE=1 SV=2	7	7	7	136.2	344.2	524.2	729.8	256.2	205.9	301.5
High	Q3TZZ7	Extended synaptotagmin-2 OS=Mus musculus OX=10090 GN=Esyt2 PE=1 SV=1	6	6	6	94.1	177.1	167.3	224.5	683.8	133.1	243.9
High	Q0GNC1	Inverted formin-2 OS=Mus musculus OX=10090 GN=Inf2 PE=1 SV=1	7	7	7	138.5	138.2	603.5	2058.1	59.7	56	59.6
High	P01807	Ig heavy chain V region X44 OS=Mus musculus OX=10090 PE=1 SV=1	5	9	5	13.2	771.1	757	854.9	797.5	812.7	751.6
High	P35980	60S ribosomal protein L18 OS=Mus musculus OX=10090 GN=Rpl18 PE=1 SV=3	5	9	5	21.6	672.6	712.6	992	657.8	2258.8	815.9
High	O35218	Cleavage and polyadenylation specificity factor subunit 2 OS=Mus musculus OX=10090 GN=Cpsf2 PE=1 SV=1	6	6	6	88.3	342.7	356.2	482.3	41.6	70.3	65.9
High	P14685	26S proteasome non-ATPase regulatory subunit 3 OS=Mus musculus OX=10090 GN=Psmd3 PE=1 SV=3	8	8	8	60.7	688.2	895.9	1143.2	272	403.9	340.1
High	Q922P9	Putative oxidoreductase GLYR1 OS=Mus musculus OX=10090 GN=Glyr1 PE=1 SV=1	8	9	8	59.7	474.2	442.2	511.7	30.4	46	52.5
High	Q9CQN1	Heat shock protein 75 kDa, mitochondrial OS=Mus musculus OX=10090 GN=Trap1 PE=1 SV=1	6	6	6	80.2	345.5	450.7	864.7	123.8	261	264.7
High	P62852	40S ribosomal protein S25 OS=Mus musculus OX=10090 GN=Rps25 PE=1 SV=1	8	16	8	13.7	3452.9	3953.2	4774.9	723.4	269.5	98.5
High	Q91V41	Ras-related protein Rab-14 OS=Mus musculus OX=10090 GN=Rab14 PE=1 SV=3	8	11	8	23.9	1119.8	1309.8	1595	824.2	744	640.9
High	P09103	Protein disulfide-isomerase OS=Mus musculus OX=10090 GN=P4hb PE=1 SV=2	6	8	6	57	209.3	237.6	794.3	479.1	336.3	1053.6
High	O70152	Dolichol-phosphate mannosyltransferase subunit 1 OS=Mus musculus OX=10090 GN=Dpm1 PE=1 SV=1	8	8	8	29.2	383.7	402	468.4	150.5	114.5	126.4
High	P13864	DNA (cytosine-5)-methyltransferase 1 OS=Mus musculus OX=10090 GN=Dnmt1 PE=1 SV=5	4	6	4	183.1	263.4	259.3	330.1	17.6	38.8	22.5
High	P63038	60 kDa heat shock protein, mitochondrial OS=Mus musculus OX=10090 GN=Hspd1 PE=1 SV=1	7	11	7	60.9	1018.6	1174.1	2672.3	453.9	433.9	663.6
High	P01671	Ig kappa chain V-III region PC 7175 OS=Mus musculus OX=10090 PE=1 SV=1	3	7	2	12	239.3	220	234.8	180.9	195.9	191.2
High	Q9D8N0	Elongation factor 1-gamma OS=Mus musculus OX=10090 GN=Eef1g PE=1 SV=3	8	10	8	50	559.3	654.6	1272.3	377.2	556	696.5
High	Q8VED5	Keratin, type II cytoskeletal 79 OS=Mus musculus OX=10090 GN=Krt79 PE=1 SV=2	6	20	1	57.5	1004.5	492.2	2073.3	774.4	420	516.4
High	O08692	Neutrophilic granule protein OS=Mus musculus OX=10090 GN=Ngp PE=1 SV=1	6	10	6	19.3	62.8	77.5	114.2	297	966.8	1735.4
High	P18527	Ig heavy chain V region 914 OS=Mus musculus OX=10090 PE=1 SV=1	3	6	2	10.7	477.5	473.4	517	448.3	440.2	388.3
High	Q925I1	ATPase family AAA domain-containing protein 3 OS=Mus musculus OX=10090 GN=Atad3 PE=1 SV=1	5	6	5	66.7	252.1	333.1	444.1	47.2	126.1	102
High	P84084	ADP-ribosylation factor 5 OS=Mus musculus OX=10090 GN=Arf5 PE=1 SV=2	4	9	3	20.5	314	515.9	599.9	223.1	185.6	189.5
High	P70333	Heterogeneous nuclear ribonucleoprotein H2 OS=Mus musculus OX=10090 GN=Hnrnph2 PE=1 SV=1	5	5	4	49.2	107	101.2	174.2	42.8	17.6	63.1
High	Q06180	Tyrosine-protein phosphatase non-receptor type 2 OS=Mus musculus OX=10090 GN=Ptpn2 PE=1 SV=2	5	7	5	47.3	177	255	273.5	75.2	58.1	43
High	P09411	Phosphoglycerate kinase 1 OS=Mus musculus OX=10090 GN=Pgk1 PE=1 SV=4	7	10	7	44.5	277.5	269.6	780.6	634.8	368.7	1488.1
High	Q99L45	Eukaryotic translation initiation factor 2 subunit 2 OS=Mus musculus OX=10090 GN=Eif2s2 PE=1 SV=1	8	9	8	38.1	252.6	302.1	419.1	102	82.5	68.2
High	Q99PV0	Pre-mRNA-processing-splicing factor 8 OS=Mus musculus OX=10090 GN=Prpf8 PE=1 SV=2	10	10	10	273.4	166.3	177.5	232.6	132.8	117.1	437
High	Q61753	D-3-phosphoglycerate dehydrogenase OS=Mus musculus OX=10090 GN=Phgdh PE=1 SV=3	7	7	7	56.5	499.3	589.1	898.4	208.7	391.1	321.2
High	P01639	Immunoglobulin kappa chain variable 9-120 OS=Mus musculus OX=10090 GN=Igkv9-120 PE=1 SV=1	4	5	4	14.3	333.4	348.1	367.3	306.1	296.2	289.4
High	P98086	Complement C1q subcomponent subunit A OS=Mus musculus OX=10090 GN=C1qa PE=1 SV=2	4	12	4	26	1453.4	1388.3	1538	1166.4	1211.9	973.9
High	O35130	Ribosomal RNA small subunit methyltransferase NEP1 OS=Mus musculus OX=10090 GN=Emg1 PE=1 SV=1	6	8	6	27	821.2	843.6	880.3	226	1254.8	675.4
High	P62821	Ras-related protein Rab-1A OS=Mus musculus OX=10090 GN=Rab1A PE=1 SV=3	6	8	3	22.7	273.7	383	473.1	260.9	242.6	193
High	P12382	ATP-dependent 6-phosphofructokinase, liver type OS=Mus musculus OX=10090 GN=Pfkl PE=1 SV=4	7	10	4	85.3	58	72.7	99.6	147.6	186.4	216.8
High	Q8R1B4	Eukaryotic translation initiation factor 3 subunit C OS=Mus musculus OX=10090 GN=Eif3c PE=1 SV=1	7	7	7	105.5	276.8	348	605.7	83.8	111.7	123.1
High	Q8BJ71	Nuclear pore complex protein Nup93 OS=Mus musculus OX=10090 GN=Nup93 PE=1 SV=1	8	10	8	93.2	820.3	907.2	1135.5	191.3	249.3	208.6
High	Q9EPU4	Cleavage and polyadenylation specificity factor subunit 1 OS=Mus musculus OX=10090 GN=Cpsf1 PE=1 SV=1	6	6	6	160.7	394	389.1	502.9	49.3	50.7	66
High	Q3V3R1	Monofunctional C1-tetrahydrofolate synthase, mitochondrial OS=Mus musculus OX=10090 GN=Mthfd1l PE=1 SV=2	7	9	6	105.7	247.8	282.2	376.6	82.3	112.1	128.9
High	P27661	Histone H2AX OS=Mus musculus OX=10090 GN=H2ax PE=1 SV=2	9	21	5	15.1	1773.2	954.8	868.8	623.4	443.1	1044.8
High	P03977	Ig kappa chain V-III region 50S10.1 OS=Mus musculus OX=10090 PE=1 SV=1	3	6	1	12	194.6	203.2	218.7	174.7	167.2	171.2
High	P11440	Cyclin-dependent kinase 1 OS=Mus musculus OX=10090 GN=Cdk1 PE=1 SV=3	5	7	4	34.1	450.3	636.8	669.9	128.6	203.5	204.9
High	Q91VI7	Ribonuclease inhibitor OS=Mus musculus OX=10090 GN=Rnh1 PE=1 SV=1	4	5	4	49.8	129.3	153.3	251	189	257.4	270.9
High	P60867	40S ribosomal protein S20 OS=Mus musculus OX=10090 GN=Rps20 PE=1 SV=1	7	20	7	13.4	3732.2	4210.8	4595.6	276.9	1516.6	317
High	Q9ERZ0	Hemogen OS=Mus musculus OX=10090 GN=Hemgn PE=1 SV=1	8	9	8	55	1212.8	1166	1433.1	43.3	75.3	42.8
High	Q5SFM8	RNA-binding protein 27 OS=Mus musculus OX=10090 GN=Rbm27 PE=1 SV=3	6	7	5	118.5	88	73.5	91.7	2.6	5.8	4.3
High	P01656	Ig kappa chain V-III region MOPC 70 OS=Mus musculus OX=10090 PE=1 SV=1	3	6	1	11.9	103.9	108.8	100.5	92.2	88.7	81.5
High	Q9CPW4	Actin-related protein 2/3 complex subunit 5 OS=Mus musculus OX=10090 GN=Arpc5 PE=1 SV=3	5	5	5	16.3	33.5	264.6	936	41.3	40.6	49.2
High	Q3TDQ1	Dolichyl-diphosphooligosaccharide--protein glycosyltransferase subunit STT3B OS=Mus musculus OX=10090 GN=Stt3b PE=1 SV=2	9	13	7	93.2	946.3	696.4	878.6	342.8	158.8	135
High	Q9DB20	ATP synthase subunit O, mitochondrial OS=Mus musculus OX=10090 GN=Atp5po PE=1 SV=1	6	6	6	23.3	198.6	186.7	293.2	125.2	97.9	137.3
High	P06330	Ig heavy chain V region AC38 205.12 OS=Mus musculus OX=10090 PE=1 SV=1	4	12	3	12.9	542.8	524.5	562	492.7	475.9	410.4
High	Q62376	U1 small nuclear ribonucleoprotein 70 kDa OS=Mus musculus OX=10090 GN=Snrnp70 PE=1 SV=2	4	7	4	52	100.5	173.9	256.8	80.1	116.9	80.3
High	Q8VI84	Nucleolar complex protein 3 homolog OS=Mus musculus OX=10090 GN=Noc3l PE=2 SV=2	7	10	7	93.2	538.5	434.9	679	17.2	44.3	15.5
High	P18242	Cathepsin D OS=Mus musculus OX=10090 GN=Ctsd PE=1 SV=1	4	7	4	44.9	640.3	607.4	1611	506.9	374.3	833.2
High	Q9EPU0	Regulator of nonsense transcripts 1 OS=Mus musculus OX=10090 GN=Upf1 PE=1 SV=2	6	6	6	123.9	240.6	308.9	329.4	73.5	99	96.5
High	P17751	Triosephosphate isomerase OS=Mus musculus OX=10090 GN=Tpi1 PE=1 SV=5	6	7	6	26.7	355.6	265.9	527.9	698.8	401.2	1208.1
High	Q8CIH5	1-phosphatidylinositol 4,5-bisphosphate phosphodiesterase gamma-2 OS=Mus musculus OX=10090 GN=Plcg2 PE=1 SV=1	9	11	9	147.5	21.4	17.3	19.4	125.8	568.5	852.3
High	Q8C3J5	Dedicator of cytokinesis protein 2 OS=Mus musculus OX=10090 GN=Dock2 PE=1 SV=3	9	9	9	211.6	437.6	642.7	794.6	281.4	201.6	221.8
High	P51150	Ras-related protein Rab-7a OS=Mus musculus OX=10090 GN=Rab7a PE=1 SV=2	4	6	4	23.5	446.2	469	680.8	811.8	345.8	552.3
High	Q99JI6	Ras-related protein Rap-1b OS=Mus musculus OX=10090 GN=Rap1b PE=1 SV=2	7	11	1	20.8
High	P97310	DNA replication licensing factor MCM2 OS=Mus musculus OX=10090 GN=Mcm2 PE=1 SV=3	6	6	6	102	247.1	299.9	366.2	186.6	232.6	226.5
High	P68510	14-3-3 protein eta OS=Mus musculus OX=10090 GN=Ywhah PE=1 SV=2	6	13	4	28.2	16.2	28.6	51.7	22.8	11.6	42.8
High	P55065	Phospholipid transfer protein OS=Mus musculus OX=10090 GN=Pltp PE=1 SV=1	5	5	5	54.4	199.6	189.3	213.4	221.3	271.9	246.2
High	Q922S8	Kinesin-like protein KIF2C OS=Mus musculus OX=10090 GN=Kif2c PE=1 SV=1	6	9	4	81	365.2	471.7	561	32.7	67.6	49.1
High	Q9JLF6	Protein-glutamine gamma-glutamyltransferase K OS=Mus musculus OX=10090 GN=Tgm1 PE=1 SV=2	8	10	8	89.8	285.5	217.2	863.1	286.7	166.1	212.8
High	O55143	Sarcoplasmic/endoplasmic reticulum calcium ATPase 2 OS=Mus musculus OX=10090 GN=Atp2a2 PE=1 SV=2	6	8	6	114.8	387.7	386.3	584.8	170.1	223.6	203.9
High	P70670	Nascent polypeptide-associated complex subunit alpha, muscle-specific form OS=Mus musculus OX=10090 GN=Naca PE=1 SV=2	3	7	3	220.4	450.6	507.5	506.1	66.5	1047.4	258.2
High	P00920	Carbonic anhydrase 2 OS=Mus musculus OX=10090 GN=Ca2 PE=1 SV=4	4	6	4	29	356.9	636.1	2025	72.4	72.5	163.7
High	P01801	Ig heavy chain V-III region J606 OS=Mus musculus OX=10090 PE=1 SV=1	5	5	5	12.8	211.3	200.7	218	179.6	187.4	155.3
High	P35991	Tyrosine-protein kinase BTK OS=Mus musculus OX=10090 GN=Btk PE=1 SV=4	7	10	7	76.4	236.4	292.5	348.8	492.4	127.2	132.4
High	Q9D6Z1	Nucleolar protein 56 OS=Mus musculus OX=10090 GN=Nop56 PE=1 SV=2	4	5	4	64.4	219.3	145.2	178	39.2	56	109.7
High	Q99JX7	Nuclear RNA export factor 1 OS=Mus musculus OX=10090 GN=Nxf1 PE=1 SV=3	5	7	5	70.3	716.1	647.8	723.8	59.9	65.7	71.3
High	P01638	Ig kappa chain V-V region L6 (Fragment) OS=Mus musculus OX=10090 PE=4 SV=1	3	10	3	13	864.4	894.7	946	771	745.8	693.5
High	Q9CQD1	Ras-related protein Rab-5A OS=Mus musculus OX=10090 GN=Rab5a PE=1 SV=1	4	5	3	23.6	338.2	387.2	485	216.9	210.2	199.3
High	Q810D6	Glutamate-rich WD repeat-containing protein 1 OS=Mus musculus OX=10090 GN=Grwd1 PE=1 SV=2	5	5	5	49.2	386.9	388.6	424.1	46.8	74.9	107.7
High	Q60963	Platelet-activating factor acetylhydrolase OS=Mus musculus OX=10090 GN=Pla2g7 PE=1 SV=2	7	7	7	49.2	240.3	278.4	344.1	329.4	413.5	305.9
High	Q61171	Peroxiredoxin-2 OS=Mus musculus OX=10090 GN=Prdx2 PE=1 SV=3	6	8	6	21.8	362.7	495.7	921.6	197.1	157.6	340.4
High	P62835	Ras-related protein Rap-1A OS=Mus musculus OX=10090 GN=Rap1a PE=1 SV=1	7	11	1	21
High	Q8BVE8	Histone-lysine N-methyltransferase NSD2 OS=Mus musculus OX=10090 GN=Nsd2 PE=1 SV=2	7	9	7	152.2	653.6	627	690	89.1	111.1	102.8
High	Q9DCV7	Keratin, type II cytoskeletal 7 OS=Mus musculus OX=10090 GN=Krt7 PE=1 SV=1	6	14	2	50.7	4.5	78.3	10.9	12.4	7.6	8.2
High	Q9WTX5	S-phase kinase-associated protein 1 OS=Mus musculus OX=10090 GN=Skp1 PE=1 SV=3	5	6	5	18.7	90.5	120.9	171.3	28.6	31.1	42
High	Q9Z204	Heterogeneous nuclear ribonucleoproteins C1/C2 OS=Mus musculus OX=10090 GN=Hnrnpc PE=1 SV=1	7	8	7	34.4	748.8	467.3	748.1	255.6	318.4	718.3
High	P30415	NK-tumor recognition protein OS=Mus musculus OX=10090 GN=Nktr PE=1 SV=4	5	5	5	163.4	239.1	412.5	553.4	2.6	2.6
High	Q9Z2X1	Heterogeneous nuclear ribonucleoprotein F OS=Mus musculus OX=10090 GN=Hnrnpf PE=1 SV=3	6	8	5	45.7	545.1	559.6	854.2	87.8	156.1	154.9
High	P80316	T-complex protein 1 subunit epsilon OS=Mus musculus OX=10090 GN=Cct5 PE=1 SV=1	5	6	5	59.6	211.7	242.8	380.5	94.1	130.1	142.5
High	P16045	Galectin-1 OS=Mus musculus OX=10090 GN=Lgals1 PE=1 SV=3	5	6	5	14.9	211.6	160	291.2	1746.4	528.9	1654.3
High	Q6ZPL9	ATP-dependent RNA helicase DDX55 OS=Mus musculus OX=10090 GN=Ddx55 PE=1 SV=2	5	5	5	68.4	92.3	100.4	120.9	47	50.1	44.6
High	Q9JHW4	Selenocysteine-specific elongation factor OS=Mus musculus OX=10090 GN=Eefsec PE=1 SV=2	6	7	6	63.5	782.6	1070.4	1136.2	205.2	157	186.5
High	O54941	SWI/SNF-related matrix-associated actin-dependent regulator of chromatin subfamily E member 1 OS=Mus musculus OX=10090 GN=Smarce1 PE=1 SV=1	5	7	5	46.6	226.1	250.5	310.5	27.3	32.3	43.2
High	Q62187	Transcription termination factor 1 OS=Mus musculus OX=10090 GN=Ttf1 PE=1 SV=2	5	5	5	97.7	576.3	421.1	532.1	124.1	158.2	208.6
High	Q0VEE6	Zinc finger protein 800 OS=Mus musculus OX=10090 GN=Znf800 PE=1 SV=1	7	8	7	74.8	1024.9	722.4	824.1	26.4	15.9	13.1
High	Q9CYH6	Ribosome biogenesis regulatory protein homolog OS=Mus musculus OX=10090 GN=Rrs1 PE=1 SV=1	6	9	6	41.5	468.7	437	929.8	17.4	17.9	21
High	Q9QZL0	Receptor-interacting serine/threonine-protein kinase 3 OS=Mus musculus OX=10090 GN=Ripk3 PE=1 SV=2	4	4	4	53.3	230.6	409.9	467.7	143.9	136.6	127.2
High	Q9QYJ0	DnaJ homolog subfamily A member 2 OS=Mus musculus OX=10090 GN=Dnaja2 PE=1 SV=1	6	6	6	45.7	266.6	350.8	431.3	112	221.1	166.5
High	Q3UHX9	Putative methyltransferase C9orf114 homolog OS=Mus musculus OX=10090 GN=Spout1 PE=1 SV=1	7	7	7	42.9	367.2	661	859	12.6	66.6	28.7
High	P17426	AP-2 complex subunit alpha-1 OS=Mus musculus OX=10090 GN=Ap2a1 PE=1 SV=1	6	9	2	107.6	153	178.2	266.4	53.5	42.4	49.1
High	O88569	Heterogeneous nuclear ribonucleoproteins A2/B1 OS=Mus musculus OX=10090 GN=Hnrnpa2b1 PE=1 SV=2	5	6	5	37.4	196.3	112.4	356.8	45	40.7	151.3
High	Q8VDY9	Caspase activity and apoptosis inhibitor 1 OS=Mus musculus OX=10090 GN=Caap1 PE=1 SV=2	4	5	4	37.8	318.5	299.4	361.8	4	41	4.9
High	P17427	AP-2 complex subunit alpha-2 OS=Mus musculus OX=10090 GN=Ap2a2 PE=1 SV=2	6	8	2	104	64.2	78.9	105	37.6	61.8	54.8
High	Q61937	Nucleophosmin OS=Mus musculus OX=10090 GN=Npm1 PE=1 SV=1	5	6	5	32.5	338.8	372	637.1	156.8	206.8	273.5
High	Q9D937	Uncharacterized protein C11orf98 homolog OS=Mus musculus OX=10090 PE=1 SV=1	5	12	5	14.1	3698.3	3875.6	4877.5	28.5	24.2	23.2
High	O08749	Dihydrolipoyl dehydrogenase, mitochondrial OS=Mus musculus OX=10090 GN=Dld PE=1 SV=2	6	6	6	54.2	439.6	600.7	653.2	269.8	186.2	352.7
High	Q9DB42	Zinc finger protein 593 OS=Mus musculus OX=10090 GN=Znf593 PE=1 SV=2	4	10	4	15.1	746.6	538	771.9	2.7	2.5	11.7
High	Q91WK0	Leucine-rich repeat flightless-interacting protein 2 OS=Mus musculus OX=10090 GN=Lrrfip2 PE=1 SV=1	3	4	3	47.1		58.5	153.4	2.6
High	Q08288	Cell growth-regulating nucleolar protein OS=Mus musculus OX=10090 GN=Lyar PE=1 SV=2	5	6	5	43.7	267.7	330	578.7	23.9	22.7	21.3
High	Q9D1G1	Ras-related protein Rab-1B OS=Mus musculus OX=10090 GN=Rab1b PE=1 SV=1	6	8	3	22.2	365.9	528.4	685.7	243.8	160.6	137.3
High	P01665	Ig kappa chain V-III region PC 7043 OS=Mus musculus OX=10090 PE=1 SV=1	2	6	1	12	140.2	151.5	161.8	135.1	131.4	138.9
High	Q91YR5	eEF1A lysine and N-terminal methyltransferase OS=Mus musculus OX=10090 GN=Mettl13 PE=1 SV=1	5	8	5	78.7	231.9	248.1	267.4	90.7	97.2	89.1
High	Q3UFY8	tRNA methyltransferase 10 homolog C OS=Mus musculus OX=10090 GN=Trmt10c PE=1 SV=2	4	5	4	48.4	309.8	357.4	521.2	14.3	22.9	31.8
High	P21981	Protein-glutamine gamma-glutamyltransferase 2 OS=Mus musculus OX=10090 GN=Tgm2 PE=1 SV=4	7	7	7	77	641.1	718	993.7	36.9	180.3	62.7
High	P97742	Carnitine O-palmitoyltransferase 1, liver isoform OS=Mus musculus OX=10090 GN=Cpt1a PE=1 SV=4	4	5	4	88.2	188.5	301	332.2	80.9	71	86.6
High	Q9R1C7	Pre-mRNA-processing factor 40 homolog A OS=Mus musculus OX=10090 GN=Prpf40a PE=1 SV=1	6	7	6	108.4	335.2	306.1	391.5	386.4	369.6	866.7
High	Q8BGS1	Band 4.1-like protein 5 OS=Mus musculus OX=10090 GN=Epb41l5 PE=1 SV=1	6	6	6	81.6	623.1	968.6	987.4	10.6	24.6	24
High	P11276	Fibronectin OS=Mus musculus OX=10090 GN=Fn1 PE=1 SV=4	6	6	6	272.4	118.8	93.1	118.2	103.4	100.1	111
High	P46460	Vesicle-fusing ATPase OS=Mus musculus OX=10090 GN=Nsf PE=1 SV=2	9	11	9	82.6	313.6	483.6	665.2	302.9	260.3	331.6
High	P35550	rRNA 2'-O-methyltransferase fibrillarin OS=Mus musculus OX=10090 GN=Fbl PE=1 SV=2	6	8	6	34.3	1209.3	906.7	1004.9	507.4	240.2	227.7
High	P59999	Actin-related protein 2/3 complex subunit 4 OS=Mus musculus OX=10090 GN=Arpc4 PE=1 SV=3	5	9	5	19.7	165.4	910.4	2782.8	147.9	162.2	228.6
High	Q69ZS7	HBS1-like protein OS=Mus musculus OX=10090 GN=Hbs1l PE=1 SV=2	7	7	7	75.1	622.5	554	613	828.5	302.9	226.3
High	Q8BLR5	PH and SEC7 domain-containing protein 4 OS=Mus musculus OX=10090 GN=Psd4 PE=1 SV=1	6	7	6	112.7	878.1	989.5	1182.4	223	281.1	349.7
High	P22599	Alpha-1-antitrypsin 1-2 OS=Mus musculus OX=10090 GN=Serpina1b PE=1 SV=2	5	6	1	45.9
High	Q9D1R9	60S ribosomal protein L34 OS=Mus musculus OX=10090 GN=Rpl34 PE=1 SV=2	7	12	7	13.3	1236.3	1353.9	2024.5	55.6	63.1	95.2
High	P62862	40S ribosomal protein S30 OS=Mus musculus OX=10090 GN=Fau PE=1 SV=1	5	12	5	6.6	3988.3	3415.6	5922.8	41.6	30.2	35.6
High	P63323	40S ribosomal protein S12 OS=Mus musculus OX=10090 GN=Rps12 PE=1 SV=2	4	5	4	14.5	633.4	824.1	1015.4	112.1	227.6	152.1
High	Q6ZWU9	40S ribosomal protein S27 OS=Mus musculus OX=10090 GN=Rps27 PE=1 SV=3	4	9	2	9.5	476	617.7	799.8	34.8	75.9	26.3
High	Q9CQF3	Cleavage and polyadenylation specificity factor subunit 5 OS=Mus musculus OX=10090 GN=Nudt21 PE=1 SV=1	6	11	6	26.2	957.8	1853.4	2539.4	64.9	60	116.4
High	P62259	14-3-3 protein epsilon OS=Mus musculus OX=10090 GN=Ywhae PE=1 SV=1	5	10	3	29.2	62.4	116.5	317.7	97.1	70	215.7
High	Q99P91	Transmembrane glycoprotein NMB OS=Mus musculus OX=10090 GN=Gpnmb PE=1 SV=2	3	5	3	63.6	12.1	6.2	10.5	722.6	2120	1376.7
High	P68254	14-3-3 protein theta OS=Mus musculus OX=10090 GN=Ywhaq PE=1 SV=1	6	12	2	27.8	27.1	37.3	56.5	37.6	28.8	55.1
High	Q9JI39	ATP-binding cassette sub-family B member 10, mitochondrial OS=Mus musculus OX=10090 GN=Abcb10 PE=1 SV=1	6	6	6	77.1	183	216.5	278.4	5.5	16.7	17.6
High	Q9EPL8	Importin-7 OS=Mus musculus OX=10090 GN=Ipo7 PE=1 SV=2	5	7	5	119.4	152	218.7	354.6	68.4	136.4	129.8
High	Q6PHN9	Ras-related protein Rab-35 OS=Mus musculus OX=10090 GN=Rab35 PE=1 SV=1	4	6	4	23	834.7	991.1	1302.1	495.9	520.1	423.4
High	P61979	Heterogeneous nuclear ribonucleoprotein K OS=Mus musculus OX=10090 GN=Hnrnpk PE=1 SV=1	6	6	6	50.9	230.8	217.1	458	146.3	110.9	187.2
High	Q9D823	60S ribosomal protein L37 OS=Mus musculus OX=10090 GN=Rpl37 PE=1 SV=3	6	21	6	11.1	3176.7	3520.8	3870.2	78.3	257.8	43.3
High	Q64737	Trifunctional purine biosynthetic protein adenosine-3 OS=Mus musculus OX=10090 GN=Gart PE=1 SV=3	7	8	7	107.4	488.8	620.4	851.8	121.9	357.9	215.4
High	E9PVX6	Proliferation marker protein Ki-67 OS=Mus musculus OX=10090 GN=Mki67 PE=1 SV=1	6	6	6	350.7	524.9	320.6	487	98.8	469	182.1
High	Q9JIF7	Coatomer subunit beta OS=Mus musculus OX=10090 GN=Copb1 PE=1 SV=1	7	7	7	107	340.8	529.8	706	268.1	314.3	332.4
High	Q99KJ8	Dynactin subunit 2 OS=Mus musculus OX=10090 GN=Dctn2 PE=1 SV=3	5	5	5	44.1	12.9	24	30.6	20.6	19.7	21.3
High	P01635	Immunoglobulin kappa chain variable 12-41 (Fragment) OS=Mus musculus OX=10090 GN=Igkv12-41 PE=1 SV=1	3	6	3	12.6	743.2	686.4	755.2	625.1	568.1	543.7
High	Q9D7S7	60S ribosomal protein L22-like 1 OS=Mus musculus OX=10090 GN=Rpl22l1 PE=1 SV=1	5	11	4	14.5	1158	1089.1	1231	89.6	85.4	70.6
High	Q8K2T1	NmrA-like family domain-containing protein 1 OS=Mus musculus OX=10090 GN=Nmral1 PE=1 SV=1	4	4	4	34.4	302.8	540.2	582.9	143.6	137.4	253.8
High	P62192	26S proteasome regulatory subunit 4 OS=Mus musculus OX=10090 GN=Psmc1 PE=1 SV=1	6	7	5	49.2	369.2	488.9	657.4	135.7	112.2	126.5
High	Q9ERK4	Exportin-2 OS=Mus musculus OX=10090 GN=Cse1l PE=1 SV=1	6	6	6	110.4	222.4	334.4	476.2	127.7	156.9	187.9
High	P53994	Ras-related protein Rab-2A OS=Mus musculus OX=10090 GN=Rab2a PE=1 SV=1	3	5	3	23.5	266.4	305.5	374.6	323.8	238.1	278.6
High	P84096	Rho-related GTP-binding protein RhoG OS=Mus musculus OX=10090 GN=Rhog PE=1 SV=1	4	7	3	21.3	332.1	554.4	688.3	227.3	266.1	216.4
High	Q8CG47	Structural maintenance of chromosomes protein 4 OS=Mus musculus OX=10090 GN=Smc4 PE=1 SV=1	6	6	6	146.8	179.7	244.2	333.1	51.2	74.7	64.3
High	O70318	Band 4.1-like protein 2 OS=Mus musculus OX=10090 GN=Epb41l2 PE=1 SV=2	6	7	5	109.9	161.8	196.3	186.6	220.3	416.6	266.9
High	P62880	Guanine nucleotide-binding protein G(I)/G(S)/G(T) subunit beta-2 OS=Mus musculus OX=10090 GN=Gnb2 PE=1 SV=3	5	5	4	37.3	185.7	189.7	652.4	110.1	96.3	154
High	P07742	Ribonucleoside-diphosphate reductase large subunit OS=Mus musculus OX=10090 GN=Rrm1 PE=1 SV=2	5	5	5	90.2	425.1	509.4	666	76.6	240.6	161.7
High	F6ZDS4	Nucleoprotein TPR OS=Mus musculus OX=10090 GN=Tpr PE=1 SV=1	6	6	6	273.8	96.5	140	274	57.2	37	79.3
High	Q9CR57	60S ribosomal protein L14 OS=Mus musculus OX=10090 GN=Rpl14 PE=1 SV=3	5	8	5	23.5	309.3	431.1	958.6	1020	1215.9	215.7
High	Q99NB9	Splicing factor 3B subunit 1 OS=Mus musculus OX=10090 GN=Sf3b1 PE=1 SV=1	5	6	5	145.7	261.4	245	444.6	74.6	66.6	136.9
High	Q9JKR6	Hypoxia up-regulated protein 1 OS=Mus musculus OX=10090 GN=Hyou1 PE=1 SV=1	6	6	6	111.1	378.8	371.4	625.7	357.8	453.1	483.6
High	Q9JM93	ADP-ribosylation factor-like protein 6-interacting protein 4 OS=Mus musculus OX=10090 GN=Arl6ip4 PE=1 SV=1	4	9	4	25.5	471.3	1239.5	1016.6	20.9	74.2	49.2
High	O08810	116 kDa U5 small nuclear ribonucleoprotein component OS=Mus musculus OX=10090 GN=Eftud2 PE=1 SV=1	5	6	4	109.3	159.4	168.2	233.4	70.9	55.8	112.9
High	Q9CW03	Structural maintenance of chromosomes protein 3 OS=Mus musculus OX=10090 GN=Smc3 PE=1 SV=2	7	7	7	141.5	569.4	754.7	913.2	156.1	198.1	161.1
High	Q8BVE3	V-type proton ATPase subunit H OS=Mus musculus OX=10090 GN=Atp6v1h PE=1 SV=1	5	5	5	55.8	178.7	287.3	357.2	138.5	191.1	147.8
High	Q99L28	Probable ribosome biogenesis protein RLP24 OS=Mus musculus OX=10090 GN=Rsl24d1 PE=2 SV=1	2	6	2	19.6	342.8	316.8	370.8	34	95.5	67.7
High	P58281	Dynamin-like 120 kDa protein, mitochondrial OS=Mus musculus OX=10090 GN=Opa1 PE=1 SV=1	5	5	5	111.3	27.1	39.4	58.7	11.7	8.6	10
High	Q8R409	Protein HEXIM1 OS=Mus musculus OX=10090 GN=Hexim1 PE=1 SV=1	4	5	4	40.2	343.3	360.3	436.5	12.9	7.6	11.9
High	Q61495	Desmoglein-1-alpha OS=Mus musculus OX=10090 GN=Dsg1a PE=2 SV=2	5	8	4	114.5	248.5	138.7	317.3	261.9	183.1	155.8
High	Q9R0P5	Destrin OS=Mus musculus OX=10090 GN=Dstn PE=1 SV=3	3	6	2	18.5	154.7	146.2	182.7	104.9	107.5	159.8
High	P53026	60S ribosomal protein L10a OS=Mus musculus OX=10090 GN=Rpl10a PE=1 SV=3	5	7	5	24.9	853.2	881.2	1481.7	330.6	483.4	519
High	Q9QUM9	Proteasome subunit alpha type-6 OS=Mus musculus OX=10090 GN=Psma6 PE=1 SV=1	6	7	6	27.4	269.8	256.7	799	218.5	229.3	294.7
High	Q8CGP7	Histone H2A type 1-K OS=Mus musculus OX=10090 GN=H2ac15 PE=1 SV=3	7	21	3	14.1	376.9	241	275.7	1214	826.7	3451.7
High	P39054	Dynamin-2 OS=Mus musculus OX=10090 GN=Dnm2 PE=1 SV=2	4	5	4	98.1	286.4	405.6	491.1	200.9	229	291.5
High	P01660	Ig kappa chain V-III region PC 3741/TEPC 111 OS=Mus musculus OX=10090 PE=1 SV=1	2	8	1	12.1	356.5	342	381.5	324.4	308	304.5
High	P01636	Ig kappa chain V-V region MOPC 149 OS=Mus musculus OX=10090 PE=1 SV=1	3	4	3	12	506.7	495	516	432.7	385.6	353.5
High	Q8BIZ6	Smad nuclear-interacting protein 1 OS=Mus musculus OX=10090 GN=Snip1 PE=1 SV=1	4	5	4	44.4	215.1	258.3	398.4	2.1	2.7	3.3
High	P47856	Glutamine--fructose-6-phosphate aminotransferase [isomerizing] 1 OS=Mus musculus OX=10090 GN=Gfpt1 PE=1 SV=3	4	4	4	78.5	124.3	159.5	211.4	195.1	108.2	141.1
High	O55128	Histone deacetylase complex subunit SAP18 OS=Mus musculus OX=10090 GN=Sap18 PE=1 SV=1	5	7	5	17.6	110.1	118.6	130.8	53.7	109.2	146.8
High	P62196	26S proteasome regulatory subunit 8 OS=Mus musculus OX=10090 GN=Psmc5 PE=1 SV=1	6	7	5	45.6	174.8	283.9	349	69.7	84.5	76.3
High	Q99J99	3-mercaptopyruvate sulfurtransferase OS=Mus musculus OX=10090 GN=Mpst PE=1 SV=4	4	4	4	33.1	181	334.8	373.9	10.8	17	6.7
High	Q14AX6	Cyclin-dependent kinase 12 OS=Mus musculus OX=10090 GN=Cdk12 PE=1 SV=2	2	4	2	163.6	451.7	466.1	566	3.3	2.6
High	Q9D8B3	Charged multivesicular body protein 4b OS=Mus musculus OX=10090 GN=Chmp4b PE=1 SV=2	4	4	4	24.9	417.1	358.9	469	220.6	598.3	209.1
High	P18525	Ig heavy chain V region 5-84 OS=Mus musculus OX=10090 PE=1 SV=1	3	6	1	12.9	136.4	82	96.6	87.5	87.5	73.1
High	Q9DC51	Guanine nucleotide-binding protein G(i) subunit alpha-3 OS=Mus musculus OX=10090 GN=Gnai3 PE=1 SV=3	4	5	2	40.5	8.6	11	76.8	4.3	2.2	4.3
High	P63168	Dynein light chain 1, cytoplasmic OS=Mus musculus OX=10090 GN=Dynll1 PE=1 SV=1	2	4	2	10.4	203.4	265.8	342.6	257.1	210.3	295.5
High	P45952	Medium-chain specific acyl-CoA dehydrogenase, mitochondrial OS=Mus musculus OX=10090 GN=Acadm PE=1 SV=1	3	3	3	46.5	304.7	212.8	310.7	41.6	37.6	51.4
High	Q8BK63	Casein kinase I isoform alpha OS=Mus musculus OX=10090 GN=Csnk1a1 PE=1 SV=2	4	4	4	38.9	170.7	183.7	227.5	155.3	180.9	276
High	Q8JZU2	Tricarboxylate transport protein, mitochondrial OS=Mus musculus OX=10090 GN=Slc25a1 PE=1 SV=1	5	7	5	33.9	672.5	944.8	1031.2	446.3	327.4	326.8
High	G5E870	E3 ubiquitin-protein ligase TRIP12 OS=Mus musculus OX=10090 GN=Trip12 PE=1 SV=1	6	6	6	224	162.3	165.4	309.2	17.4	24.1	26
High	Q02248	Catenin beta-1 OS=Mus musculus OX=10090 GN=Ctnnb1 PE=1 SV=1	5	7	2	85.4	104	72	211	128.5	75.6	202.3
High	Q3U2U7	Methyltransferase-like protein 17, mitochondrial OS=Mus musculus OX=10090 GN=Mettl17 PE=1 SV=2	5	6	5	52	235.3	285.2	360.2	254.5	313	246.9
High	Q80X73	Protein pelota homolog OS=Mus musculus OX=10090 GN=Pelo PE=1 SV=3	5	7	5	43.3	130.8	174.8	189.1	34.5	34.4	33
High	Q6GSS7	Histone H2A type 2-A OS=Mus musculus OX=10090 GN=Hist2h2aa1 PE=1 SV=3	7	19	3	14.1	231.6	155.8	182.2	1538.6	872.2	4613
High	P46467	Vacuolar protein sorting-associated protein 4B OS=Mus musculus OX=10090 GN=Vps4b PE=1 SV=2	5	5	5	49.4	25.6	42.6	49.6	10.6	11.2	9
High	Q8VDN2	Sodium/potassium-transporting ATPase subunit alpha-1 OS=Mus musculus OX=10090 GN=Atp1a1 PE=1 SV=1	3	3	3	112.9	51.5	78.9	119.5	61	52.4	58.8
High	Q9CZX8	40S ribosomal protein S19 OS=Mus musculus OX=10090 GN=Rps19 PE=1 SV=3	5	7	5	16.1	186.8	270	547.7	202.4	273.6	312.1
High	A6X935	Inter alpha-trypsin inhibitor, heavy chain 4 OS=Mus musculus OX=10090 GN=Itih4 PE=1 SV=2	5	5	5	104.6	186.2	178.5	266.6	204.5	244.4	263
High	Q9DBJ1	Phosphoglycerate mutase 1 OS=Mus musculus OX=10090 GN=Pgam1 PE=1 SV=3	3	3	3	28.8	233.6	127.4	321.9	570	332.5	1365
High	Q8BH04	Phosphoenolpyruvate carboxykinase [GTP], mitochondrial OS=Mus musculus OX=10090 GN=Pck2 PE=1 SV=1	4	4	4	70.5	94.5	146.6	175	74.2	72.4	75.4
High	Q9DCL9	Multifunctional protein ADE2 OS=Mus musculus OX=10090 GN=Paics PE=1 SV=4	3	4	3	47	144.2	193.1	262.9	50.5	126	125.6
High	Q99M87	DnaJ homolog subfamily A member 3, mitochondrial OS=Mus musculus OX=10090 GN=Dnaja3 PE=1 SV=1	3	5	3	52.4	122.4	138.8	194.8	54.4	145.3	148
High	P48025	Tyrosine-protein kinase SYK OS=Mus musculus OX=10090 GN=Syk PE=1 SV=2	6	6	6	71.3	214.5	291	329.2	134.1	228.1	219.1
High	P10922	Histone H1.0 OS=Mus musculus OX=10090 GN=H1-0 PE=2 SV=4	5	7	5	20.8	1139.9	449.8	802.1	19.4	35.5	117
High	Q6ZWY3	40S ribosomal protein S27-like OS=Mus musculus OX=10090 GN=Rps27l PE=1 SV=3	3	7	1	9.5	86.9	111.2	163.9	15	16.1	10.1
High	Q9QWR8	Alpha-N-acetylgalactosaminidase OS=Mus musculus OX=10090 GN=Naga PE=1 SV=2	6	7	6	47.2	690.5	509.6	718.1	57.7	45.5	65.9
High	P62984	Ubiquitin-60S ribosomal protein L40 OS=Mus musculus OX=10090 GN=Uba52 PE=1 SV=2	5	6	1	14.7	336.5	341	509.7	13.5	19.5	102.2
High	Q3TKT4	Transcription activator BRG1 OS=Mus musculus OX=10090 GN=Smarca4 PE=1 SV=1	5	5	5	181.3	128.4	160.3	204	73.8	105.9	111.5
High	P16951	Cyclic AMP-dependent transcription factor ATF-2 OS=Mus musculus OX=10090 GN=Atf2 PE=1 SV=2	4	4	4	52.3	77.1	76.9	80.8	368.4	212.8	755.5
High	P26151	High affinity immunoglobulin gamma Fc receptor I OS=Mus musculus OX=10090 GN=Fcgr1 PE=1 SV=1	5	7	5	44.9	126.1	610.7	263.5	169.7	2720.7	324.2
High	A2A6A1	G patch domain-containing protein 8 OS=Mus musculus OX=10090 GN=Gpatch8 PE=1 SV=1	4	6	4	164.9	582.8	472.9	535.4	34.9	25.6	34.7
High	P62962	Profilin-1 OS=Mus musculus OX=10090 GN=Pfn1 PE=1 SV=2	4	7	4	14.9	488.8	648.4	1846.9	874.1	530.7	1301.2
High	Q5SYD0	Unconventional myosin-Id OS=Mus musculus OX=10090 GN=Myo1d PE=1 SV=1	6	6	6	116	10.4	364.8	730.1	18.6	17.9	21.5
High	Q8K2F0	Bromodomain-containing protein 3 OS=Mus musculus OX=10090 GN=Brd3 PE=1 SV=2	4	6	4	79.7	711.1	624.9	953.7	17.9	104.9	16
High	P63242	Eukaryotic translation initiation factor 5A-1 OS=Mus musculus OX=10090 GN=Eif5a PE=1 SV=2	5	6	5	16.8	569.1	592.8	883.5	292.2	552.9	474
High	P10639	Thioredoxin OS=Mus musculus OX=10090 GN=Txn PE=1 SV=3	6	8	6	11.7	1130.8	1247.6	1692.1	585.4	828	970.8
High	Q9D0I9	Arginine--tRNA ligase, cytoplasmic OS=Mus musculus OX=10090 GN=Rars1 PE=1 SV=2	5	7	5	75.6	96.1	134.2	207.6	50.2	64.9	60.6
High	Q99M73	Keratin, type II cuticular Hb4 OS=Mus musculus OX=10090 GN=Krt84 PE=2 SV=2	6	10	2	64.9
High	P61750	ADP-ribosylation factor 4 OS=Mus musculus OX=10090 GN=Arf4 PE=1 SV=2	3	7	2	20.4	354.8	530.9	595.6	304.1	330.8	323
High	O35350	Calpain-1 catalytic subunit OS=Mus musculus OX=10090 GN=Capn1 PE=1 SV=1	4	6	4	82.1	348.6	141.4	199.9	169.2	141.5	148
High	Q00612	Glucose-6-phosphate 1-dehydrogenase X OS=Mus musculus OX=10090 GN=G6pdx PE=1 SV=3	6	7	6	59.2	374.1	529	676.7	328.3	471.9	406.9
High	Q3UQU0	Bromodomain-containing protein 9 OS=Mus musculus OX=10090 GN=Brd9 PE=1 SV=1	3	6	3	66.8	78.4	83	100.7	936.5	487.9	1101.6
High	O09061	Proteasome subunit beta type-1 OS=Mus musculus OX=10090 GN=Psmb1 PE=1 SV=1	4	4	4	26.4	116.8	100.5	341	120.5	90.4	158.1
High	P61982	14-3-3 protein gamma OS=Mus musculus OX=10090 GN=Ywhag PE=1 SV=2	5	10	3	28.3	150.9	169.5	372.6	181.2	144.6	425.8
High	Q60875	Rho guanine nucleotide exchange factor 2 OS=Mus musculus OX=10090 GN=Arhgef2 PE=1 SV=4	5	7	5	111.9	170.2	242.8	288.5	86.1	106.9	104.6
High	Q9CWW7	CXXC-type zinc finger protein 1 OS=Mus musculus OX=10090 GN=Cxxc1 PE=1 SV=1	4	4	4	76.1	312.3	407	367.1	36	1193.6	79.5
High	O70325	Phospholipid hydroperoxide glutathione peroxidase OS=Mus musculus OX=10090 GN=Gpx4 PE=1 SV=4	4	4	4	22.2	232.6	346.5	436.6	34	34.4	51.3
High	P62858	40S ribosomal protein S28 OS=Mus musculus OX=10090 GN=Rps28 PE=1 SV=1	3	4	3	7.8	122.6	121.4	165	151.2	44.6	96.5
High	P40124	Adenylyl cyclase-associated protein 1 OS=Mus musculus OX=10090 GN=Cap1 PE=1 SV=4	5	5	5	51.5	74.7	101.2	249.5	155.6	114.7	258.3
High	Q9JJI8	60S ribosomal protein L38 OS=Mus musculus OX=10090 GN=Rpl38 PE=1 SV=3	4	6	4	8.2	745.1	789.1	1091.3	13.9	3.4	27.1
High	P50516	V-type proton ATPase catalytic subunit A OS=Mus musculus OX=10090 GN=Atp6v1a PE=1 SV=2	4	4	4	68.3	107.1	134.4	277.4	90.5	120	168.9
High	P97496	SWI/SNF complex subunit SMARCC1 OS=Mus musculus OX=10090 GN=Smarcc1 PE=1 SV=2	5	6	3	122.8	320.5	383.3	559.5	106.9	53.6	52.4
High	P13439	Uridine 5'-monophosphate synthase OS=Mus musculus OX=10090 GN=Umps PE=1 SV=3	4	4	4	52.3	80.9	106.7	141.2	24.8	52.6	28.2
High	E9Q7G0	Nuclear mitotic apparatus protein 1 OS=Mus musculus OX=10090 GN=Numa1 PE=1 SV=1	5	5	5	235.5	113.6	142.5	247	88.1	66.5	68.6
High	P01631	Ig kappa chain V-II region 26-10 OS=Mus musculus OX=10090 PE=1 SV=1	3	8	3	12.3	730.7	654.3	746.6	593.6	529.3	498.3
High	O09110	Dual specificity mitogen-activated protein kinase kinase 3 OS=Mus musculus OX=10090 GN=Map2k3 PE=1 SV=2	4	4	4	39.3	248.8	405.4	456.8	92.8	43.4	52.2
High	O35492	Dual specificity protein kinase CLK3 OS=Mus musculus OX=10090 GN=Clk3 PE=1 SV=2	5	5	5	73.8	395.1	1124.3	1137.4	58.8	101.7	54.6
High	P18155	Bifunctional methylenetetrahydrofolate dehydrogenase/cyclohydrolase, mitochondrial OS=Mus musculus OX=10090 GN=Mthfd2 PE=1 SV=1	4	5	4	37.8	396.6	373.2	528	68.7	207.2	91.7
High	Q9CWJ9	Bifunctional purine biosynthesis protein ATIC OS=Mus musculus OX=10090 GN=Atic PE=1 SV=2	3	3	3	64.2	99.8	128.6	412.5	69.5	89.6	151.7
High	Q8BK35	Ribosome biogenesis protein NOP53 OS=Mus musculus OX=10090 GN=Nop53 PE=1 SV=1	5	5	5	55.8	846.7	627.8	993.6	33.7	64.1	55.2
High	O89053	Coronin-1A OS=Mus musculus OX=10090 GN=Coro1a PE=1 SV=5	6	8	6	51	110.8	108.7	260	396.6	440.4	926.9
High	Q80Y44	Probable ATP-dependent RNA helicase DDX10 OS=Mus musculus OX=10090 GN=Ddx10 PE=1 SV=2	4	4	4	100.7	62.5	79.8	91.1	16.1	35.9	29.4
High	Q6ZQ29	Serine/threonine-protein kinase TAO2 OS=Mus musculus OX=10090 GN=Taok2 PE=1 SV=3	4	5	4	139.2	179.2	214.6	180.7	163.3	414.9	353.9
High	P49135	General transcription and DNA repair factor IIH helicase subunit XPB OS=Mus musculus OX=10090 GN=Ercc3 PE=2 SV=1	5	5	5	89.1	272.8	265.1	332.7	44.4	47.5	45.9
High	O08756	3-hydroxyacyl-CoA dehydrogenase type-2 OS=Mus musculus OX=10090 GN=Hsd17b10 PE=1 SV=4	1	2	1	27.4	78.5	92.4	106.4	24	46.1	36.4
High	Q62168	Keratin, type I cuticular Ha2 OS=Mus musculus OX=10090 GN=Krt32 PE=1 SV=2	5	15	2	46.4	13.2	11.1	22.4	12.9	6.4	392.1
High	P62137	Serine/threonine-protein phosphatase PP1-alpha catalytic subunit OS=Mus musculus OX=10090 GN=Ppp1ca PE=1 SV=1	4	4	2	37.5	135.9	140.8	161.2	53.1	73.7	77
High	Q91YI4	Beta-arrestin-2 OS=Mus musculus OX=10090 GN=Arrb2 PE=1 SV=1	5	5	4	46.3	115.1	129.1	137.7	239.1	293.9	464.2
High	P35279	Ras-related protein Rab-6A OS=Mus musculus OX=10090 GN=Rab6a PE=1 SV=4	4	7	4	23.6	393.6	492	602.9	173.4	193.6	159.4
High	P61027	Ras-related protein Rab-10 OS=Mus musculus OX=10090 GN=Rab10 PE=1 SV=1	5	7	5	22.5	721.6	814.9	997.1	494.7	401.5	375.3
High	Q3THW5	Histone H2A.V OS=Mus musculus OX=10090 GN=H2az2 PE=1 SV=3	4	7	2	13.5	433.4	309.6	352.7	431.9	117.7	563.7
High	Q3UFB2	Box C/D snoRNA protein 1 OS=Mus musculus OX=10090 GN=Znhit6 PE=1 SV=2	4	5	4	52.2	338.7	456.7	473.3	32.1	285.5	58.5
High	Q9D051	Pyruvate dehydrogenase E1 component subunit beta, mitochondrial OS=Mus musculus OX=10090 GN=Pdhb PE=1 SV=1	5	5	5	38.9	405.2	436.1	636.1	98.9	147.7	168.5
High	Q61029	Lamina-associated polypeptide 2, isoforms beta/delta/epsilon/gamma OS=Mus musculus OX=10090 GN=Tmpo PE=1 SV=4	3	3	3	50.3	286.6	235.7	366	36.2	15.1	44.7
High	P28867	Protein kinase C delta type OS=Mus musculus OX=10090 GN=Prkcd PE=1 SV=3	4	5	4	77.5	39.1	68.4	89.3	186.6	107.3	95.4
High	P68433	Histone H3.1 OS=Mus musculus OX=10090 GN=H3c1 PE=1 SV=2	5	11	2	15.4	1464.5	780.7	736.4	264.9	111.4	360.1
High	P55258	Ras-related protein Rab-8A OS=Mus musculus OX=10090 GN=Rab8a PE=1 SV=2	4	5	2	23.7	140.9	141.6	206.3	123.2	130.2	97.9
High	P23198	Chromobox protein homolog 3 OS=Mus musculus OX=10090 GN=Cbx3 PE=1 SV=2	3	4	3	20.8	251.6	205.8	265	74.5	47.2	109.7
High	Q8BW10	RNA-binding protein NOB1 OS=Mus musculus OX=10090 GN=Nob1 PE=1 SV=1	5	5	5	45.4	405.5	433.5	537.3	55	63.3	56.7
High	P60766	Cell division control protein 42 homolog OS=Mus musculus OX=10090 GN=Cdc42 PE=1 SV=2	3	6	2	21.2	59.1	101.6	253.3	110.3	71.6	107.5
High	P46735	Unconventional myosin-Ib OS=Mus musculus OX=10090 GN=Myo1b PE=1 SV=3	5	7	5	128.5	623.4	1091.2	1549.2	347.6	996.8	126.3
High	Q01730	Ras suppressor protein 1 OS=Mus musculus OX=10090 GN=Rsu1 PE=1 SV=3	5	5	5	31.5	158.2	172.1	228.3	62.1	43.1	61.8
High	P21845	Tryptase beta-2 OS=Mus musculus OX=10090 GN=Tpsb2 PE=1 SV=2	3	4	3	30.9	34.6	41.9	50.9	505.2	140.3	498.3
High	Q99KP6	Pre-mRNA-processing factor 19 OS=Mus musculus OX=10090 GN=Prpf19 PE=1 SV=1	3	3	3	55.2	196.5	186	281	70.1	73.8	72.6
High	Q9DCW4	Electron transfer flavoprotein subunit beta OS=Mus musculus OX=10090 GN=Etfb PE=1 SV=3	5	6	5	27.6	268.4	352.8	542.1	195.7	58.2	155.8
High	Q9WVA4	Transgelin-2 OS=Mus musculus OX=10090 GN=Tagln2 PE=1 SV=4	3	3	3	22.4	68.1	93	174.2	81.1	31.5	89.6
High	P97350	Plakophilin-1 OS=Mus musculus OX=10090 GN=Pkp1 PE=1 SV=1	4	4	4	80.8	84.4	44.1	99.6	91.7	59.7	182.4
High	Q9ES52	Phosphatidylinositol 3,4,5-trisphosphate 5-phosphatase 1 OS=Mus musculus OX=10090 GN=Inpp5d PE=1 SV=2	3	3	3	133.5	16.2	34.9	66.6	75.8	50	77.8
High	Q8BHD7	Polypyrimidine tract-binding protein 3 OS=Mus musculus OX=10090 GN=Ptbp3 PE=1 SV=1	3	6	2	56.7	202.3	188.4	213.7	39.8	18.5	23.8
High	Q8VIJ6	Splicing factor, proline- and glutamine-rich OS=Mus musculus OX=10090 GN=Sfpq PE=1 SV=1	4	4	3	75.4	97.9	82.4	197.3	66.8	48.6	123.9
High	Q99P88	Nuclear pore complex protein Nup155 OS=Mus musculus OX=10090 GN=Nup155 PE=1 SV=1	2	2	2	155	64.9	80.6	124.4	20.2	41.2	31.2
High	Q6IRU2	Tropomyosin alpha-4 chain OS=Mus musculus OX=10090 GN=Tpm4 PE=1 SV=3	6	14	2	28.5	19.5	56.4	277.3	31.8	104.1	56.2
High	Q02053	Ubiquitin-like modifier-activating enzyme 1 OS=Mus musculus OX=10090 GN=Uba1 PE=1 SV=1	4	4	4	117.7	106.6	131.5	211.3	103.3	122.9	160.6
High	P62320	Small nuclear ribonucleoprotein Sm D3 OS=Mus musculus OX=10090 GN=Snrpd3 PE=1 SV=1	3	3	3	13.9	177.2	174.5	282.4	90	69.2	99.2
High	P97447	Four and a half LIM domains protein 1 OS=Mus musculus OX=10090 GN=Fhl1 PE=1 SV=3	3	3	3	31.9	638.3	33	41.6	5.3	7.9	7.8
High	Q8BVK9	Sp110 nuclear body protein OS=Mus musculus OX=10090 GN=Sp110 PE=1 SV=1	4	4	4	50.1	291.9	261.9	361	4.6	43.7	6.4
High	Q9CQV8	14-3-3 protein beta/alpha OS=Mus musculus OX=10090 GN=Ywhab PE=1 SV=3	5	11	1	28.1	21.3	27.4	57.3	28.1	14.8	55.9
High	Q9QVP9	Protein-tyrosine kinase 2-beta OS=Mus musculus OX=10090 GN=Ptk2b PE=1 SV=2	5	5	5	115.7	150.8	193.5	275.7	66	42.6	53.4
High	Q8CGZ0	Calcium homeostasis endoplasmic reticulum protein OS=Mus musculus OX=10090 GN=Cherp PE=1 SV=1	5	5	5	106.1	1210.3	802.5	1347.3	51	98.3	57
High	Q9CPQ3	Mitochondrial import receptor subunit TOM22 homolog OS=Mus musculus OX=10090 GN=Tomm22 PE=1 SV=3	3	3	3	15.5	151.5	176.3	204	43.8	74.3	54.9
High	P19096	Fatty acid synthase OS=Mus musculus OX=10090 GN=Fasn PE=1 SV=2	5	5	5	272.3	69.8	88.2	174.6	180.6	236.3	265.4
High	Q9ET01	Glycogen phosphorylase, liver form OS=Mus musculus OX=10090 GN=Pygl PE=1 SV=4	4	4	4	97.4	158.6	155.3	318.9	137.7	148.6	461.5
High	P97377	Cyclin-dependent kinase 2 OS=Mus musculus OX=10090 GN=Cdk2 PE=1 SV=2	4	5	3	39
High	Q8R016	Bleomycin hydrolase OS=Mus musculus OX=10090 GN=Blmh PE=1 SV=1	5	6	5	52.5	563.7	233.4	1017.2	398.6	253.2	440
High	P46978	Dolichyl-diphosphooligosaccharide--protein glycosyltransferase subunit STT3A OS=Mus musculus OX=10090 GN=Stt3a PE=1 SV=1	6	7	4	80.5	393.5	429.6	612.6	140.4	224.8	204.3
High	P35282	Ras-related protein Rab-21 OS=Mus musculus OX=10090 GN=Rab21 PE=1 SV=4	4	4	4	24.1	212	285	343.3	160.1	171	122.6
High	Q99020	Heterogeneous nuclear ribonucleoprotein A/B OS=Mus musculus OX=10090 GN=Hnrnpab PE=1 SV=1	2	3	2	30.8	51	45.2	109	33.1	37.3	81.1
High	P35492	Histidine ammonia-lyase OS=Mus musculus OX=10090 GN=Hal PE=1 SV=1	4	4	4	72.2	148.4	54.1	342.9	115.5	60	104.2
High	P39749	Flap endonuclease 1 OS=Mus musculus OX=10090 GN=Fen1 PE=1 SV=1	5	5	5	42.3	342.9	450.6	512.5	41.9	57.6	75.9
High	P39447	Tight junction protein ZO-1 OS=Mus musculus OX=10090 GN=Tjp1 PE=1 SV=2	3	3	3	194.6	253.5	200.2	131.7	174.9	44.6	158
High	P50580	Proliferation-associated protein 2G4 OS=Mus musculus OX=10090 GN=Pa2g4 PE=1 SV=3	5	5	5	43.7	227.5	249.9	948.2	152.6	191.1	396.1
High	Q9Z2I8	Succinate--CoA ligase [GDP-forming] subunit beta, mitochondrial OS=Mus musculus OX=10090 GN=Suclg2 PE=1 SV=3	4	5	4	46.8	229.1	382.3	645	25.2	41.9	36.2
High	Q8BU88	39S ribosomal protein L22, mitochondrial OS=Mus musculus OX=10090 GN=Mrpl22 PE=1 SV=1	5	5	5	23.8	87.2	86.2	120.8	149.1	231.7	198.2
High	Q9JM76	Actin-related protein 2/3 complex subunit 3 OS=Mus musculus OX=10090 GN=Arpc3 PE=1 SV=3	4	5	4	20.5	112.3	782.3	2447.6	100.1	155.9	145.1
High	Q61655	ATP-dependent RNA helicase DDX19A OS=Mus musculus OX=10090 GN=Ddx19a PE=1 SV=2	3	5	3	53.9	577.1	765.6	886.3	91.6	112.3	95.9
High	Q61164	Transcriptional repressor CTCF OS=Mus musculus OX=10090 GN=Ctcf PE=1 SV=2	4	5	4	83.7	768.3	603.9	786.7	145.2	51.2	47.1
High	Q8VDW0	ATP-dependent RNA helicase DDX39A OS=Mus musculus OX=10090 GN=Ddx39a PE=1 SV=1	5	5	5	49	373.5	504	682.7	161	196.6	213.5
High	Q0VBK2	Keratin, type II cytoskeletal 80 OS=Mus musculus OX=10090 GN=Krt80 PE=1 SV=1	5	8	5	50.6	956.6	572.6	1523.1	1167.3	692.6	747.3
High	Q61584	Fragile X mental retardation syndrome-related protein 1 OS=Mus musculus OX=10090 GN=Fxr1 PE=1 SV=2	3	4	3	76.2	100.1	109.9	143.1	45.7	44.1	27
High	Q8BMF4	Dihydrolipoyllysine-residue acetyltransferase component of pyruvate dehydrogenase complex, mitochondrial OS=Mus musculus OX=10090 GN=Dlat PE=1 SV=2	3	3	3	67.9	72.8	92.2	152.6	86.7	146.5	111.9
High	O88379	Bromodomain adjacent to zinc finger domain protein 1A OS=Mus musculus OX=10090 GN=Baz1a PE=1 SV=3	3	4	3	178.3	190.5	175.5	232.5	12.3	27.8	28.7
High	P54775	26S proteasome regulatory subunit 6B OS=Mus musculus OX=10090 GN=Psmc4 PE=1 SV=2	5	5	4	47.4	237.6	387.3	478.4	89.1	134.9	92
High	Q8K2Y7	39S ribosomal protein L47, mitochondrial OS=Mus musculus OX=10090 GN=Mrpl47 PE=1 SV=2	2	5	2	29.7	50.4	39.7	73.8	163.4	133	773.3
High	P42125	Enoyl-CoA delta isomerase 1, mitochondrial OS=Mus musculus OX=10090 GN=Eci1 PE=1 SV=2	3	4	3	32.2	516.8	659.6	807.4	64.8	46.3	58.5
High	Q64511	DNA topoisomerase 2-beta OS=Mus musculus OX=10090 GN=Top2b PE=1 SV=2	5	8	5	181.8	873.6	651	983.9	150.4	415.4	178.6
High	Q99LC3	NADH dehydrogenase [ubiquinone] 1 alpha subcomplex subunit 10, mitochondrial OS=Mus musculus OX=10090 GN=Ndufa10 PE=1 SV=1	4	4	4	40.6	559	787.7	960.7	225	201.4	131.7
High	Q8VEM8	Phosphate carrier protein, mitochondrial OS=Mus musculus OX=10090 GN=Slc25a3 PE=1 SV=1	6	6	6	39.6	99.9	120	213.3	69.7	53.6	87.1
High	Q9D819	Inorganic pyrophosphatase OS=Mus musculus OX=10090 GN=Ppa1 PE=1 SV=1	3	3	3	32.6	305.1	398.2	493.1	137.6	81.4	56.7
High	O70494	Transcription factor Sp3 OS=Mus musculus OX=10090 GN=Sp3 PE=1 SV=2	3	3	3	82.3	208	196.8	202.1	6.8	7.1	4.8
High	P13634	Carbonic anhydrase 1 OS=Mus musculus OX=10090 GN=Ca1 PE=1 SV=4	4	5	4	28.3	190.7	249.1	660.7	59.1	53.4	86.2
High	Q8VDP2	STING ER exit protein OS=Mus musculus OX=10090 GN=Steep1 PE=1 SV=1	3	4	3	25.6	127.1	226.4	269.5		8.4	3.8
High	Q64674	Spermidine synthase OS=Mus musculus OX=10090 GN=Srm PE=1 SV=1	3	3	3	34	40.7	38.8	87.5	42	40	63.9
High	P01642	Ig kappa chain V-V region L7 (Fragment) OS=Mus musculus OX=10090 GN=Gm10881 PE=1 SV=1	2	4	2	12.6	206.2	206	230.4	187.8	171.7	163.3
High	Q9JM52	Misshapen-like kinase 1 OS=Mus musculus OX=10090 GN=Mink1 PE=1 SV=3	4	4	2	147.2	90.2	133.7	130.6	76.1	113.5	162.9
High	Q9WVA3	Mitotic checkpoint protein BUB3 OS=Mus musculus OX=10090 GN=Bub3 PE=1 SV=2	4	4	4	36.9	408.7	434.9	537.7	122.5	113.1	138.1
High	Q922U1	U4/U6 small nuclear ribonucleoprotein Prp3 OS=Mus musculus OX=10090 GN=Prpf3 PE=1 SV=1	4	4	4	77.4	236.3	252.4	247	58.7	58.3	53.2
High	P70168	Importin subunit beta-1 OS=Mus musculus OX=10090 GN=Kpnb1 PE=1 SV=2	4	5	4	97.1	179.6	295.4	631.4	84	110.4	160.3
High	P14824	Annexin A6 OS=Mus musculus OX=10090 GN=Anxa6 PE=1 SV=3	4	5	4	75.8	12.8	19.6	49.1	70.5	41.3	103.5
High	O88685	26S proteasome regulatory subunit 6A OS=Mus musculus OX=10090 GN=Psmc3 PE=1 SV=2	5	5	5	49.5	102.3	132	182.1	49.2	62	87.7
High	P27600	Guanine nucleotide-binding protein subunit alpha-12 OS=Mus musculus OX=10090 GN=Gna12 PE=1 SV=3	3	4	2	44.1	111.8	226.4	463.6	90.9	74.4	85.2
High	Q9Z1Q9	Valine--tRNA ligase OS=Mus musculus OX=10090 GN=Vars1 PE=1 SV=1	3	3	3	140.1	59.4	94.1	202	38.8	36.4	61.6
High	Q5DU09	Zinc finger protein 652 OS=Mus musculus OX=10090 GN=Znf652 PE=1 SV=2	3	4	3	69.4	208.9	228.5	250.4	8.5	11.5	12.9
High	Q9D2Q8	Protein S100-A14 OS=Mus musculus OX=10090 GN=S100a14 PE=1 SV=1	1	3	1	11.6	98.6	57.4	273.4	102	63.5	99.6
High	O88428	Bifunctional 3'-phosphoadenosine 5'-phosphosulfate synthase 2 OS=Mus musculus OX=10090 GN=Papss2 PE=1 SV=2	5	5	5	70.3	33.6	27.4	55.3	313.2	68.2	237.1
High	Q80ZJ1	Ras-related protein Rap-2a OS=Mus musculus OX=10090 GN=Rap2a PE=1 SV=2	4	4	4	20.6	87.8	130.7	228.2	72.4	120.8	71.1
High	P01872	Immunoglobulin heavy constant mu OS=Mus musculus OX=10090 GN=Ighm PE=1 SV=2	4	4	4	49.9	102.8	43.8	52.8	41.4	66.2	42.2
High	P46662	Merlin OS=Mus musculus OX=10090 GN=Nf2 PE=1 SV=2	3	3	3	69.7	7.5	10	11.1	49	35.6	20.1
High	Q62425	Cytochrome c oxidase subunit NDUFA4 OS=Mus musculus OX=10090 GN=Ndufa4 PE=1 SV=2	3	5	3	9.3	293.5	391.7	440.3	63	45.7	32.9
High	P84244	Histone H3.3 OS=Mus musculus OX=10090 GN=H3-3a PE=1 SV=2	5	9	2	15.3	228.2	186.8	270.7	36.5	69.3	79.2
High	Q3TEA8	Heterochromatin protein 1-binding protein 3 OS=Mus musculus OX=10090 GN=Hp1bp3 PE=1 SV=1	4	5	4	60.8	40.6	34.2	39.6	4.8	2.9	6.1
High	Q9CQN7	39S ribosomal protein L41, mitochondrial OS=Mus musculus OX=10090 GN=Mrpl41 PE=1 SV=1	3	4	3	15.3	56	44.7	66.7	251.8	262.1	1350.1
High	P35979	60S ribosomal protein L12 OS=Mus musculus OX=10090 GN=Rpl12 PE=1 SV=2	4	6	4	17.8	642.7	762.4	1061.7	471.2	512.4	715.1
High	Q5HZG4	Transcription initiation factor TFIID subunit 3 OS=Mus musculus OX=10090 GN=Taf3 PE=1 SV=2	2	3	2	105	384.6	314.4	494.1	18.4	131.8	154.2
High	Q76MZ3	Serine/threonine-protein phosphatase 2A 65 kDa regulatory subunit A alpha isoform OS=Mus musculus OX=10090 GN=Ppp2r1a PE=1 SV=3	4	4	4	65.3	51.8	60.7	87	25.3	23.1	43.9
High	Q8BFZ9	Erlin-2 OS=Mus musculus OX=10090 GN=Erlin2 PE=1 SV=1	4	4	1	37.8	14.2	19.7	25.6	14.3	15.2	15.4
High	P25911	Tyrosine-protein kinase Lyn OS=Mus musculus OX=10090 GN=Lyn PE=1 SV=4	5	7	4	58.8	21.6	40	121.4	46.2	31.1	50.7
High	Q9CYX7	RRP15-like protein OS=Mus musculus OX=10090 GN=Rrp15 PE=1 SV=2	3	4	3	31	108.8	105.5	146.3	168.8	358.9	800.3
High	O88665	Bromodomain-containing protein 7 OS=Mus musculus OX=10090 GN=Brd7 PE=1 SV=1	4	5	4	74	325.6	282.3	401.4	63.4	785.3	226.2
High	Q8BGJ9	Splicing factor U2AF 26 kDa subunit OS=Mus musculus OX=10090 GN=U2af1l4 PE=1 SV=1	3	6	1	25.8	36.9	52.7	58.8	9.8	6	17.1
High	Q6NV83	U2 snRNP-associated SURP motif-containing protein OS=Mus musculus OX=10090 GN=U2surp PE=1 SV=3	5	5	5	118.2	479	420.7	729.8	42.1	60.6	58.9
High	Q61768	Kinesin-1 heavy chain OS=Mus musculus OX=10090 GN=Kif5b PE=1 SV=3	3	4	3	109.5	40	49.6	70.4	30.5	25	37.2
High	P37913	DNA ligase 1 OS=Mus musculus OX=10090 GN=Lig1 PE=1 SV=2	3	3	3	102.2	60	79.6	110.5	21.5	26	39.8
High	Q78ZA7	Nucleosome assembly protein 1-like 4 OS=Mus musculus OX=10090 GN=Nap1l4 PE=1 SV=1	3	4	2	42.7	20.9	35.5	57.4	12.3	4.3	15.2
High	Q9EQI8	39S ribosomal protein L46, mitochondrial OS=Mus musculus OX=10090 GN=Mrpl46 PE=1 SV=1	3	3	3	32.1	328.7	263.4	291.7	26.6	37.8	26.4
High	P35293	Ras-related protein Rab-18 OS=Mus musculus OX=10090 GN=Rab18 PE=1 SV=2	3	3	3	23	163.8	199.6	245.4	68.2	83	64
High	Q9CQ69	Cytochrome b-c1 complex subunit 8 OS=Mus musculus OX=10090 GN=Uqcrq PE=1 SV=3	4	5	4	9.8	283.2	377.4	492.4	172	127	137.5
High	Q9CQ43	Deoxyuridine 5'-triphosphate nucleotidohydrolase OS=Mus musculus OX=10090 GN=Dut PE=1 SV=1	4	5	4	17.4	220.9	219.7	333.9	23.7	65.6	35.9
High	Q9CU62	Structural maintenance of chromosomes protein 1A OS=Mus musculus OX=10090 GN=Smc1a PE=1 SV=4	4	4	4	143.1	239	304.2	382.1	81.1	111.3	88.7
High	P23506	Protein-L-isoaspartate(D-aspartate) O-methyltransferase OS=Mus musculus OX=10090 GN=Pcmt1 PE=1 SV=3	4	4	4	24.6	240.3	335.8	362.2	351.2	286.5	179.2
High	Q8K4L0	ATP-dependent RNA helicase DDX54 OS=Mus musculus OX=10090 GN=Ddx54 PE=1 SV=1	5	8	5	97.7	484.1	350.6	545.3	4.8	15.8	11.7
High	P05202	Aspartate aminotransferase, mitochondrial OS=Mus musculus OX=10090 GN=Got2 PE=1 SV=1	3	3	3	47.4	505.6	283.6	666.3	119.2	156.5	391.2
High	P83940	Elongin-C OS=Mus musculus OX=10090 GN=Eloc PE=1 SV=1	3	4	3	12.5	113.1	158.8	182.3	36.7	40.2	47
High	P70279	Surfeit locus protein 6 OS=Mus musculus OX=10090 GN=Surf6 PE=1 SV=1	6	6	6	41.2	1253.2	951.9	1761.6	79.3	71	82.8
High	Q8BMJ3	Eukaryotic translation initiation factor 1A, X-chromosomal OS=Mus musculus OX=10090 GN=Eif1ax PE=2 SV=3	5	7	5	16.5	496.1	441.6	654.7	453	3368.5	1379.1
High	P61211	ADP-ribosylation factor-like protein 1 OS=Mus musculus OX=10090 GN=Arl1 PE=1 SV=1	4	4	4	20.4	65.7	119.7	159.7	49.8	35.8	38.8
High	Q9JJ28	Protein flightless-1 homolog OS=Mus musculus OX=10090 GN=Flii PE=1 SV=1	4	5	4	144.7	82.7	435.3	1125.9	56.7	54.7	64.4
High	P62141	Serine/threonine-protein phosphatase PP1-beta catalytic subunit OS=Mus musculus OX=10090 GN=Ppp1cb PE=1 SV=3	3	3	1	37.2
High	P31266	Recombining binding protein suppressor of hairless OS=Mus musculus OX=10090 GN=Rbpj PE=1 SV=1	4	5	4	58.5	547.1	513.5	606.8	135.3	282.6	187.5
High	O35382	Exocyst complex component 4 OS=Mus musculus OX=10090 GN=Exoc4 PE=1 SV=2	2	2	2	110.5
High	Q9QXB9	Developmentally-regulated GTP-binding protein 2 OS=Mus musculus OX=10090 GN=Drg2 PE=1 SV=1	3	5	3	40.7	32.3	27.1	28.6	17.8	15	17.9
High	P17183	Gamma-enolase OS=Mus musculus OX=10090 GN=Eno2 PE=1 SV=2	2	3	1	47.3
High	Q99LC5	Electron transfer flavoprotein subunit alpha, mitochondrial OS=Mus musculus OX=10090 GN=Etfa PE=1 SV=2	3	3	3	35	224.1	274.4	380.1	63	30.2	72.3
High	E9Q634	Unconventional myosin-Ie OS=Mus musculus OX=10090 GN=Myo1e PE=1 SV=1	4	4	1	126.7	15.8	38.2	110.9	57.9	40.9	32
High	P31725	Protein S100-A9 OS=Mus musculus OX=10090 GN=S100a9 PE=1 SV=3	2	4	2	13	59.7	73.2	112.9	245.3	771.5	2476.7
High	O70456	14-3-3 protein sigma OS=Mus musculus OX=10090 GN=Sfn PE=1 SV=2	5	9	3	27.7	82.2	44.9	88.6	59.1	50.5	410.4
High	Q8C0P5	Coronin-2A OS=Mus musculus OX=10090 GN=Coro2a PE=2 SV=1	4	4	4	59.5	64.8	43.4	98.2	202.7	76.7	142.9
High	Q99JB2	Stomatin-like protein 2, mitochondrial OS=Mus musculus OX=10090 GN=Stoml2 PE=1 SV=1	3	3	3	38.4	51.4	40.2	79.4	39.7	37.4	48.8
High	P35922	Synaptic functional regulator FMR1 OS=Mus musculus OX=10090 GN=Fmr1 PE=1 SV=1	3	4	3	68.9	161.9	196.3	199.2	137.8	229.2	279.5
High	Q9CQR2	40S ribosomal protein S21 OS=Mus musculus OX=10090 GN=Rps21 PE=1 SV=1	3	4	3	9.1	134.6	154.7	195.7	31.2	20.5	82.1
High	O55234	Proteasome subunit beta type-5 OS=Mus musculus OX=10090 GN=Psmb5 PE=1 SV=3	2	2	2	28.5
High	Q6PDG5	SWI/SNF complex subunit SMARCC2 OS=Mus musculus OX=10090 GN=Smarcc2 PE=1 SV=2	4	5	2	132.5	138.7	141	213.9	55.3	29	56.7
High	Q8BK64	Activator of 90 kDa heat shock protein ATPase homolog 1 OS=Mus musculus OX=10090 GN=Ahsa1 PE=1 SV=2	4	4	4	38.1	114.3	133.9	195.4	32.9	58	31.2
High	Q5RJG1	Nucleolar protein 10 OS=Mus musculus OX=10090 GN=Nol10 PE=2 SV=1	3	4	3	80	181.7	125.2	162	10.2	12.8	15.5
High	Q80X90	Filamin-B OS=Mus musculus OX=10090 GN=Flnb PE=1 SV=3	4	5	2	277.7	15.5	15.9	37	103.6	43.1	92.8
High	Q9JHK5	Pleckstrin OS=Mus musculus OX=10090 GN=Plek PE=1 SV=1	3	3	3	39.9	52.5	44.1	53.8	72	71.4	88.9
High	Q99KF1	Transmembrane emp24 domain-containing protein 9 OS=Mus musculus OX=10090 GN=Tmed9 PE=1 SV=2	4	5	3	27.1	147.9	100.2	384.7	188.7	86.9	271.2
High	P83510	Traf2 and NCK-interacting protein kinase OS=Mus musculus OX=10090 GN=Tnik PE=1 SV=2	4	4	2	150.3	5.8	5.6	6.7	55.5	37.5	88.1
High	O55142	60S ribosomal protein L35a OS=Mus musculus OX=10090 GN=Rpl35a PE=1 SV=2	4	6	4	12.5	228.6	238.2	522.4	825.4	1593.9	2555.8
High	P08226	Apolipoprotein E OS=Mus musculus OX=10090 GN=Apoe PE=1 SV=2	2	3	2	35.8
High	P01679	Ig kappa chain V-VI region J539 OS=Mus musculus OX=10090 PE=1 SV=1	2	4	2	11.5	300.5	280	310.9	236.2	269.1	215.4
High	Q8BH59	Calcium-binding mitochondrial carrier protein Aralar1 OS=Mus musculus OX=10090 GN=Slc25a12 PE=1 SV=1	4	5	4	74.5	295.7	339.4	416.1	166.2	207.6	174.6
High	Q8BIW1	Exopolyphosphatase PRUNE1 OS=Mus musculus OX=10090 GN=Prune1 PE=1 SV=1	3	3	3	50.2
High	P97461	40S ribosomal protein S5 OS=Mus musculus OX=10090 GN=Rps5 PE=1 SV=3	4	5	4	22.9	498.8	666.9	918.7	446.6	483.9	463.7
High	P98064	Mannan-binding lectin serine protease 1 OS=Mus musculus OX=10090 GN=Masp1 PE=1 SV=2	3	3	3	79.9	14.1	18.4	16.2	19.9	20.2	18.2
High	O89017	Legumain OS=Mus musculus OX=10090 GN=Lgmn PE=1 SV=1	3	3	3	49.3	214.8	199	294.2	11	18.3	24.4
High	Q3U186	Probable arginine--tRNA ligase, mitochondrial OS=Mus musculus OX=10090 GN=Rars2 PE=1 SV=1	3	3	3	65.3
High	Q62186	Translocon-associated protein subunit delta OS=Mus musculus OX=10090 GN=Ssr4 PE=1 SV=1	3	4	3	18.9	279	345.9	443	94.7	94.7	94.1
High	Q3TUH1	Phosphatidate cytidylyltransferase, mitochondrial OS=Mus musculus OX=10090 GN=Tamm41 PE=1 SV=2	3	3	3	37.8	88.7	35.1	53.4	12.5	9.9	11.2
High	Q8VDF2	E3 ubiquitin-protein ligase UHRF1 OS=Mus musculus OX=10090 GN=Uhrf1 PE=1 SV=2	4	6	4	88.2	314.6	230.7	308.8	52.9	78.9	54.9
High	Q9CZE3	Ras-related protein Rab-32 OS=Mus musculus OX=10090 GN=Rab32 PE=1 SV=3	3	3	3	25.1	40.3	73.2	80.2	156.2	129.3	90.2
High	Q7TMF2	3'-5' exoribonuclease 1 OS=Mus musculus OX=10090 GN=Eri1 PE=1 SV=2	4	5	4	39.5	595.6	743.9	680.5	70	92.2	53.5
High	Q9CRB2	H/ACA ribonucleoprotein complex subunit 2 OS=Mus musculus OX=10090 GN=Nhp2 PE=1 SV=1	2	2	2	17.2	103.6	95.9	126.9	17.9	17.5	10.5
High	P62743	AP-2 complex subunit sigma OS=Mus musculus OX=10090 GN=Ap2s1 PE=1 SV=1	3	3	3	17	145.7	174.8	234.9	77.6	112.9	99.1
High	E9PV24	Fibrinogen alpha chain OS=Mus musculus OX=10090 GN=Fga PE=1 SV=1	5	5	5	87.4	64.5	48.8	75.7	50.1	67.4	55.2
High	O88342	WD repeat-containing protein 1 OS=Mus musculus OX=10090 GN=Wdr1 PE=1 SV=3	3	3	3	66.4	43.8	42.1	73.7	48.7	60.6	104.2
High	Q64727	Vinculin OS=Mus musculus OX=10090 GN=Vcl PE=1 SV=4	3	4	3	116.6	27.6	20.9	59.8	34.2	33.1	57.2
High	P31324	cAMP-dependent protein kinase type II-beta regulatory subunit OS=Mus musculus OX=10090 GN=Prkar2b PE=1 SV=3	2	2	2	46.1	76.8	108.6	152.6	37.3	29.1	46.3
High	Q6NZN0	RNA-binding protein 26 OS=Mus musculus OX=10090 GN=Rbm26 PE=1 SV=2	3	3	2	114.1	236.3	82.4	124.9	9.9	37.7	10.7
High	P80313	T-complex protein 1 subunit eta OS=Mus musculus OX=10090 GN=Cct7 PE=1 SV=1	3	4	3	59.6	278.5	276.4	608.3	179.8	262.7	337.8
High	O70251	Elongation factor 1-beta OS=Mus musculus OX=10090 GN=Eef1b PE=1 SV=5	3	3	3	24.7	150	193.1	519	125.6	135.3	213.7
High	Q9CQH7	Transcription factor BTF3 homolog 4 OS=Mus musculus OX=10090 GN=Btf3l4 PE=1 SV=1	3	7	1	17.3	24.4	26.4	35.3	15.9	39.7	116.3
High	Q9DBM1	G patch domain-containing protein 1 OS=Mus musculus OX=10090 GN=Gpatch1 PE=2 SV=1	3	3	3	102.9	194.6	192.9	213.2	90.7	224.7	124.4
High	Q9CQY5	Magnesium transporter protein 1 OS=Mus musculus OX=10090 GN=Magt1 PE=1 SV=1	4	4	4	37.9	441.5	440	781.7	93.9	43.8	35
High	P18524	Ig heavy chain V region RF OS=Mus musculus OX=10090 PE=1 SV=1	2	3	2	12.9	485.2	402.9	456	463	339.8	375.5
High	P42208	Septin-2 OS=Mus musculus OX=10090 GN=Septin2 PE=1 SV=2	3	3	3	41.5	145.8	106.6	150.6	129.6	69.2	146.9
High	P62334	26S proteasome regulatory subunit 10B OS=Mus musculus OX=10090 GN=Psmc6 PE=1 SV=1	3	3	3	44.1	57.6	95.4	132.7	26.2	55.5	51.4
High	Q6NZJ6	Eukaryotic translation initiation factor 4 gamma 1 OS=Mus musculus OX=10090 GN=Eif4g1 PE=1 SV=1	3	3	3	176	58.5	83.6	142.3	18.1	28.6	32.8
High	P50247	Adenosylhomocysteinase OS=Mus musculus OX=10090 GN=Ahcy PE=1 SV=3	5	5	5	47.7	193.9	162.7	521.7	232.2	166.5	548
High	Q8K297	Procollagen galactosyltransferase 1 OS=Mus musculus OX=10090 GN=Colgalt1 PE=1 SV=2	3	4	3	71	80.3	98.4	127.5	31.1	39.7	19.1
High	Q60790	Ras GTPase-activating protein 3 OS=Mus musculus OX=10090 GN=Rasa3 PE=1 SV=2	3	3	3	95.9	23.6	25.7	37	60.9	33.1	31.3
High	Q3USH5	Splicing factor, suppressor of white-apricot homolog OS=Mus musculus OX=10090 GN=Sfswap PE=1 SV=2	3	3	3	104.1	138	198.1	295.6	33.2	18.1	20.9
High	O35900	U6 snRNA-associated Sm-like protein LSm2 OS=Mus musculus OX=10090 GN=Lsm2 PE=1 SV=1	2	2	2	10.8	35.1	30.8	64.4	18	20.6	35.2
High	Q62318	Transcription intermediary factor 1-beta OS=Mus musculus OX=10090 GN=Trim28 PE=1 SV=3	3	4	3	88.8	169.7	238.4	332.4	75.2	202.9	197.8
High	Q61598	Rab GDP dissociation inhibitor beta OS=Mus musculus OX=10090 GN=Gdi2 PE=1 SV=1	5	5	5	50.5	195	180.8	353.7	251.4	322.2	419.1
High	P61290	Proteasome activator complex subunit 3 OS=Mus musculus OX=10090 GN=Psme3 PE=1 SV=1	4	4	4	29.5	101.6	120.3	163.8	54.8	86.6	79.5
High	Q61699	Heat shock protein 105 kDa OS=Mus musculus OX=10090 GN=Hsph1 PE=1 SV=2	4	4	4	96.3	42.2	43.1	72.8	15.4	35.6	34.7
High	Q9D898	Actin-related protein 2/3 complex subunit 5-like protein OS=Mus musculus OX=10090 GN=Arpc5l PE=1 SV=1	2	2	2	17	12.3	72.2	237	9	12.4	22
High	P21550	Beta-enolase OS=Mus musculus OX=10090 GN=Eno3 PE=1 SV=3	2	2	1	47	40.8	44.5	68.2	93.2	137	168.7
High	P14211	Calreticulin OS=Mus musculus OX=10090 GN=Calr PE=1 SV=1	5	5	5	48	304.9	378.5	1362	622.2	407.1	1121.9
High	Q8K1X4	Nck-associated protein 1-like OS=Mus musculus OX=10090 GN=Nckap1l PE=1 SV=1	3	3	3	128.8	100.6	117.1	147.3	107.2	156.1	114.4
High	P01634	Ig kappa chain V-V region MOPC 21 OS=Mus musculus OX=10090 PE=1 SV=1	3	6	2	14.9	172.8	222.8	208.2	149.3	131.8	143.3
High	Q8C2K1	Differentially expressed in FDCP 6 OS=Mus musculus OX=10090 GN=Def6 PE=1 SV=1	4	5	4	73.4	101.9	116	148.9	28.1	46.9	25.7
High	Q8CCF0	U4/U6 small nuclear ribonucleoprotein Prp31 OS=Mus musculus OX=10090 GN=Prpf31 PE=1 SV=3	5	5	5	55.4	286	331.5	386.2	67.7	50.2	77.2
High	Q8QZZ8	Ras-related protein Rab-38 OS=Mus musculus OX=10090 GN=Rab38 PE=1 SV=1	2	4	2	23.8	293.4	497.3	594.6	267.4	44.7	112.7
High	Q03267	DNA-binding protein Ikaros OS=Mus musculus OX=10090 GN=Ikzf1 PE=1 SV=2	2	3	2	57.3	269.4	258.1	362.2	73.8	99.3	81
High	Q921F4	Heterogeneous nuclear ribonucleoprotein L-like OS=Mus musculus OX=10090 GN=Hnrnpll PE=1 SV=3	2	2	2	64.1	110	107.3	144.7	132.8	116.3	117.4
High	Q922H2	[Pyruvate dehydrogenase (acetyl-transferring)] kinase isozyme 3, mitochondrial OS=Mus musculus OX=10090 GN=Pdk3 PE=1 SV=1	3	3	3	47.9	193	191	217.6	39.2	68.8	46.8
High	Q3UPL0	Protein transport protein Sec31A OS=Mus musculus OX=10090 GN=Sec31a PE=1 SV=2	2	3	2	133.5	15.7	25.9	29.4	12.7	8.4	15.2
High	Q9D0R4	Probable ATP-dependent RNA helicase DDX56 OS=Mus musculus OX=10090 GN=Ddx56 PE=2 SV=1	3	3	3	61.2	91.6	73.6	94.5	19	62.7	23.2
High	Q99J62	Replication factor C subunit 4 OS=Mus musculus OX=10090 GN=Rfc4 PE=1 SV=1	3	3	3	39.8
High	Q9CWZ3	RNA-binding protein 8A OS=Mus musculus OX=10090 GN=Rbm8a PE=1 SV=4	3	4	3	19.9	64.2	68.5	78.7	143.2	75.2	143.3
High	Q7TNV0	Protein DEK OS=Mus musculus OX=10090 GN=Dek PE=1 SV=1	3	4	3	43.1	101	105.6	118	33.6	138.2	89.4
High	Q8BP48	Methionine aminopeptidase 1 OS=Mus musculus OX=10090 GN=Metap1 PE=1 SV=1	3	3	3	43.2	129.2	108.4	134.8	40	87	51
High	P54729	NEDD8 ultimate buster 1 OS=Mus musculus OX=10090 GN=Nub1 PE=1 SV=2	2	2	2	70.3	90.7	129.5	147.5	55.7	71.5	64.9
High	Q6A4J8	Ubiquitin carboxyl-terminal hydrolase 7 OS=Mus musculus OX=10090 GN=Usp7 PE=1 SV=1	3	3	3	128.4
High	A2AR02	Peptidyl-prolyl cis-trans isomerase G OS=Mus musculus OX=10090 GN=Ppig PE=1 SV=1	3	4	3	88.3	203.4	497.4	587.2	12.8	22.7	27.5
High	Q6ZPJ3	(E3-independent) E2 ubiquitin-conjugating enzyme UBE2O OS=Mus musculus OX=10090 GN=Ube2o PE=1 SV=3	4	4	4	140.7	59.1	34.8	52.4	247.4	140.4	484.9
High	Q8R5K4	Nucleolar protein 6 OS=Mus musculus OX=10090 GN=Nol6 PE=2 SV=2	3	3	3	129.1	621	613.8	666.8	42.4	254.8	120.5
High	Q8R180	ERO1-like protein alpha OS=Mus musculus OX=10090 GN=Ero1a PE=1 SV=2	3	5	3	54.1	14.6	10.9	22.2	83.5	29.9	117.4
High	P16110	Galectin-3 OS=Mus musculus OX=10090 GN=Lgals3 PE=1 SV=3	2	2	2	27.5	77.9	65.8	165.3	221	212.9	555.4
High	Q91X78	Erlin-1 OS=Mus musculus OX=10090 GN=Erlin1 PE=1 SV=2	4	4	1	39.2
High	P62855	40S ribosomal protein S26 OS=Mus musculus OX=10090 GN=Rps26 PE=1 SV=3	3	6	3	13	1066.8	1104.3	1567.1	41.8	75.3	53.5
High	Q8BZX4	Splicing regulatory glutamine/lysine-rich protein 1 OS=Mus musculus OX=10090 GN=Srek1 PE=2 SV=1	3	4	3	56.7	323.1	622	797.1	10.5	11.6	16.3
High	Q9Z2U0	Proteasome subunit alpha type-7 OS=Mus musculus OX=10090 GN=Psma7 PE=1 SV=1	3	3	3	27.8	134.4	78.8	192.9	90	98.6	108.2
High	Q8BX70	Vacuolar protein sorting-associated protein 13C OS=Mus musculus OX=10090 GN=Vps13c PE=1 SV=2	3	3	3	419.8	87.1	117.7	152.8	10.2	24.9	19.2
High	Q6PGG2	GEM-interacting protein OS=Mus musculus OX=10090 GN=Gmip PE=1 SV=1	4	5	4	107.5	102.4	126.3	138.5	66.6	185.2	91.4
High	O09044	Synaptosomal-associated protein 23 OS=Mus musculus OX=10090 GN=Snap23 PE=1 SV=1	2	2	2	23.2	17.9	40.4	195.5	22.5	11.3	26
High	Q64378	Peptidyl-prolyl cis-trans isomerase FKBP5 OS=Mus musculus OX=10090 GN=Fkbp5 PE=1 SV=1	3	3	3	50.9	108.6	165.6	195.9	26.4	28.4	48.1
High	Q8JZX3	POC1 centriolar protein homolog A OS=Mus musculus OX=10090 GN=Poc1a PE=2 SV=2	4	5	4	45.1	401.2	423.9	542.7	27	114.5	69.6
High	P46061	Ran GTPase-activating protein 1 OS=Mus musculus OX=10090 GN=Rangap1 PE=1 SV=2	3	4	3	63.5	42.6	62.9	141.3	11.7	17.5	21.7
High	Q8CFE2	Histone PARylation factor 1 OS=Mus musculus OX=10090 GN=Hpf1 PE=1 SV=1	3	3	3	39.3	140.7	176.2	201.7	12.3	19.5	14.5
High	Q8VCW2	Keratin, type I cytoskeletal 25 OS=Mus musculus OX=10090 GN=Krt25 PE=1 SV=1	2	10	1	48.9	6.4	345.5	4.4	16.3	3.8	5.8
High	P54116	Stomatin OS=Mus musculus OX=10090 GN=Stom PE=1 SV=3	3	4	3	31.4	308.9	526.7	585.3	62.6	95.7	104.9
High	O35972	39S ribosomal protein L23, mitochondrial OS=Mus musculus OX=10090 GN=Mrpl23 PE=1 SV=1	2	2	2	17.1	44.8	42.3	51.8	68.5	54.5	320.6
High	Q9EQH2	Endoplasmic reticulum aminopeptidase 1 OS=Mus musculus OX=10090 GN=Erap1 PE=1 SV=2	3	3	3	106.5
High	Q921F2	TAR DNA-binding protein 43 OS=Mus musculus OX=10090 GN=Tardbp PE=1 SV=1	3	3	3	44.5	266.8	214.6	297.7	137.5	150.2	132.5
High	Q9CY58	Plasminogen activator inhibitor 1 RNA-binding protein OS=Mus musculus OX=10090 GN=Serbp1 PE=1 SV=2	2	2	2	44.7	245.5	217.5	387.3	35.8	31	43
High	P97430	Antileukoproteinase OS=Mus musculus OX=10090 GN=Slpi PE=1 SV=1	5	5	5	14.3	27.1	24.2	29.1	100.2	545.2	1229.9
High	Q9QYL7	Activator of basal transcription 1 OS=Mus musculus OX=10090 GN=Abt1 PE=2 SV=1	3	3	3	30.6	432	452.6	444.4	16.9	243	98
High	Q9EQP2	EH domain-containing protein 4 OS=Mus musculus OX=10090 GN=Ehd4 PE=1 SV=1	3	3	2	61.4	114.4	157	215.5	47.2	130.1	52.1
High	P35564	Calnexin OS=Mus musculus OX=10090 GN=Canx PE=1 SV=1	2	2	2	67.2	25.6	27.5	63.6	21.7	6.4	20.5
High	Q7TND5	Ribosome production factor 1 OS=Mus musculus OX=10090 GN=Rpf1 PE=2 SV=2	3	3	3	40	70.4	183.9	192.5	35.6	265.9	43.6
High	Q9QXK3	Coatomer subunit gamma-2 OS=Mus musculus OX=10090 GN=Copg2 PE=1 SV=1	2	2	2	97.6
High	Q8C9B9	Death-inducer obliterator 1 OS=Mus musculus OX=10090 GN=Dido1 PE=1 SV=4	3	4	3	247	702.7	768.4	1247.2	32	19.8	11.8
High	Q08048	Hepatocyte growth factor OS=Mus musculus OX=10090 GN=Hgf PE=1 SV=1	5	6	5	82.9	153.7	87.4	101.9	220.3	887.2	623.3
High	Q9DB34	Charged multivesicular body protein 2a OS=Mus musculus OX=10090 GN=Chmp2a PE=1 SV=1	3	3	3	25.1	42.2	43.7	81.6	29	99.1	152.2
High	Q05920	Pyruvate carboxylase, mitochondrial OS=Mus musculus OX=10090 GN=Pc PE=1 SV=1	3	5	3	129.6	65.4	97.2	111.9	61.9	13	47.6
High	Q8VHZ7	U3 small nucleolar ribonucleoprotein protein IMP4 OS=Mus musculus OX=10090 GN=Imp4 PE=2 SV=1	3	4	3	33.6	108.9	110.1	124.7	75.2	67.1	116.4
High	Q93092	Transaldolase OS=Mus musculus OX=10090 GN=Taldo1 PE=1 SV=2	4	4	4	37.4	62.2	105.2	256.8	67	59.2	159
High	Q61147	Ceruloplasmin OS=Mus musculus OX=10090 GN=Cp PE=1 SV=2	4	4	4	121.1	169.2	188.1	237.4	155.6	183.2	183.5
High	Q9D880	Mitochondrial import inner membrane translocase subunit TIM50 OS=Mus musculus OX=10090 GN=Timm50 PE=1 SV=1	3	3	3	39.8	50.5	74	89.5	11.7	24.4	14.1
High	Q80UM3	N-alpha-acetyltransferase 15, NatA auxiliary subunit OS=Mus musculus OX=10090 GN=Naa15 PE=1 SV=1	3	3	3	100.9	154	175.2	221.4	121	241.4	202.4
High	P61028	Ras-related protein Rab-8B OS=Mus musculus OX=10090 GN=Rab8b PE=1 SV=1	3	4	1	23.6	26.3	25.2	37.6	65.6	15.9	34.8
High	P29699	Alpha-2-HS-glycoprotein OS=Mus musculus OX=10090 GN=Ahsg PE=1 SV=1	4	4	4	37.3	192.8	198.3	251.5	305.4	284.1	320.6
High	Q60610	Rho guanine nucleotide exchange factor TIAM1 OS=Mus musculus OX=10090 GN=Tiam1 PE=1 SV=1	3	4	3	177.4	42.2	42.5	41.2	670.2	308.2	401.1
High	P17225	Polypyrimidine tract-binding protein 1 OS=Mus musculus OX=10090 GN=Ptbp1 PE=1 SV=2	2	6	1	56.4	81.6	82.6	139.1	54.1	27.1	60.4
High	Q8CH25	SAFB-like transcription modulator OS=Mus musculus OX=10090 GN=Sltm PE=1 SV=1	3	3	3	116.9	281.8	320.9	432.5	28.2	44.7	33.4
High	Q8C2Q3	RNA-binding protein 14 OS=Mus musculus OX=10090 GN=Rbm14 PE=1 SV=1	2	2	2	69.4	417	357.3	562	62.5	77.8	32.3
High	Q9R1T2	SUMO-activating enzyme subunit 1 OS=Mus musculus OX=10090 GN=Sae1 PE=1 SV=1	4	4	4	38.6	186.9	254.8	320.2	72.1	99.7	94.1
High	Q61703	Inter-alpha-trypsin inhibitor heavy chain H2 OS=Mus musculus OX=10090 GN=Itih2 PE=1 SV=1	2	2	2	105.9	99.7	104.6	117.4	134.8	119.8	120.6
High	P57780	Alpha-actinin-4 OS=Mus musculus OX=10090 GN=Actn4 PE=1 SV=1	4	4	4	104.9	126.9	352.3	727.1	96.7	86.6	213.4
High	Q8C147	Dedicator of cytokinesis protein 8 OS=Mus musculus OX=10090 GN=Dock8 PE=1 SV=4	5	5	5	238.8	62.9	126.4	228.9	39.8	69.8	48.8
High	Q99MJ9	ATP-dependent RNA helicase DDX50 OS=Mus musculus OX=10090 GN=Ddx50 PE=2 SV=1	3	3	3	82.1	117.9	153.7	165.3	26.3	25.3	18.5
High	Q9CQE8	RNA transcription, translation and transport factor protein OS=Mus musculus OX=10090 GN=RTRAF PE=1 SV=1	3	3	3	28.1	86.3	86.3	84.5	24.6	32.8	27.7
High	Q9R0N0	Galactokinase OS=Mus musculus OX=10090 GN=Galk1 PE=1 SV=2	4	4	4	42.3	208.9	317.9	336	161	208.4	175.3
High	O08663	Methionine aminopeptidase 2 OS=Mus musculus OX=10090 GN=Metap2 PE=1 SV=1	2	2	2	52.9	66.1	61.3	84.9	29.7	10.9	18.2
High	O35691	Pinin OS=Mus musculus OX=10090 GN=Pnn PE=1 SV=4	4	5	4	82.4	606.4	726.6	1042.6	137.9	57.6	140.8
High	Q8CBY8	Dynactin subunit 4 OS=Mus musculus OX=10090 GN=Dctn4 PE=1 SV=1	2	3	2	53	15.1	43.2	129.4	30.4	15.7	24.2
High	P10605	Cathepsin B OS=Mus musculus OX=10090 GN=Ctsb PE=1 SV=2	2	2	2	37.3	33.9	47.1	56.3	4.9	25.2	10
High	Q8K194	U4/U6.U5 small nuclear ribonucleoprotein 27 kDa protein OS=Mus musculus OX=10090 GN=Snrnp27 PE=1 SV=1	1	2	1	18.9	88.2	89.6	100.2	3.3
High	Q9DCT2	NADH dehydrogenase [ubiquinone] iron-sulfur protein 3, mitochondrial OS=Mus musculus OX=10090 GN=Ndufs3 PE=1 SV=2	2	2	2	30.1	54.6	107.3	137.4	26.3	47.4	56.9
High	P56183	Ribosomal RNA processing protein 1 homolog A OS=Mus musculus OX=10090 GN=Rrp1 PE=1 SV=2	2	2	2	54.7	11.8	10.2	13.3	6.1	262.1	31
High	Q8BJL0	SWI/SNF-related matrix-associated actin-dependent regulator of chromatin subfamily A-like protein 1 OS=Mus musculus OX=10090 GN=Smarcal1 PE=1 SV=1	3	3	3	100.8	86.4	127.6	125	81	85.2	88.4
High	P01633	Immunoglobulin kappa chain variable 6-17 OS=Mus musculus OX=10090 GN=Igkv6-17 PE=1 SV=1	3	7	2	16.4	160.8	151.1	184.1	119.4	124.7	112.7
High	Q9D1J1	Adaptin ear-binding coat-associated protein 2 OS=Mus musculus OX=10090 GN=Necap2 PE=1 SV=1	2	2	2	28.6	75	108.6	105.9	5.4	6.2	9.9
High	Q6A0D4	Raftlin OS=Mus musculus OX=10090 GN=Rftn1 PE=1 SV=4	3	3	3	61.5	156.8	230.1	406.7	15.6	38.8	21
High	Q9D892	Inosine triphosphate pyrophosphatase OS=Mus musculus OX=10090 GN=Itpa PE=1 SV=2	2	2	2	21.9	172	192.4	283.7	85.7	83.8	92.7
High	Q9CZU6	Citrate synthase, mitochondrial OS=Mus musculus OX=10090 GN=Cs PE=1 SV=1	3	5	3	51.7	134.6	71	201.8	67	58.8	136.3
High	Q3UFM5	Nucleolar MIF4G domain-containing protein 1 OS=Mus musculus OX=10090 GN=Nom1 PE=1 SV=2	6	6	6	95.9	663.7	550	723.2	15.9	51.3	34.3
High	Q9D358	Low molecular weight phosphotyrosine protein phosphatase OS=Mus musculus OX=10090 GN=Acp1 PE=1 SV=3	3	4	3	18.2	374	391.8	442.9	128.8	170.2	142.2
High	Q9WTX6	Cullin-1 OS=Mus musculus OX=10090 GN=Cul1 PE=1 SV=1	4	5	4	89.6	112	207.8	300.6	36.9	54.1	56.3
High	Q9D2E2	Target of EGR1 protein 1 OS=Mus musculus OX=10090 GN=Toe1 PE=1 SV=1	3	4	3	56.8	79.3	99.1	90.2	43.4	41.2	14.8
High	E9PVA8	eIF-2-alpha kinase activator GCN1 OS=Mus musculus OX=10090 GN=Gcn1 PE=1 SV=1	5	5	5	292.8	87.6	156.8	185.2	43.5	85.5	105.4
High	P12246	Serum amyloid P-component OS=Mus musculus OX=10090 GN=Apcs PE=1 SV=2	2	2	2	26.2	88.1	68.1	79.7	78.3	84	66.1
High	Q9D0F6	Replication factor C subunit 5 OS=Mus musculus OX=10090 GN=Rfc5 PE=1 SV=1	2	2	2	38.1	167.3	233.3	264.5	36.1	57.4	34.9
High	Q99KK2	N-acylneuraminate cytidylyltransferase OS=Mus musculus OX=10090 GN=Cmas PE=1 SV=2	3	3	3	48	161.7	175.5	202.7	32.1	41	32.1
High	Q9ERU3	Zinc finger protein 22 OS=Mus musculus OX=10090 GN=Znf22 PE=1 SV=2	3	3	3	27.3	311.6	317.8	543.4	21.1	20.8	17.4
High	Q9JJZ6	Krueppel-like factor 13 OS=Mus musculus OX=10090 GN=Klf13 PE=1 SV=2	2	2	2	31.1	42.4	55.1	66.5			6.8
High	Q9CPQ8	ATP synthase subunit g, mitochondrial OS=Mus musculus OX=10090 GN=Atp5mg PE=1 SV=1	2	4	2	11.4	194.3	223.7	321.3	96.7	90.9	142.3
High	Q6P1F6	Serine/threonine-protein phosphatase 2A 55 kDa regulatory subunit B alpha isoform OS=Mus musculus OX=10090 GN=Ppp2r2a PE=1 SV=1	4	4	4	51.7	93.6	115	136.9	35.7	54.8	58.6
High	Q9CQT1	Methylthioribose-1-phosphate isomerase OS=Mus musculus OX=10090 GN=Mri1 PE=1 SV=1	2	3	2	39.4	22	29.3	29.1	17	14.6	16.9
High	Q3TZX8	Polynucleotide 5'-hydroxyl-kinase NOL9 OS=Mus musculus OX=10090 GN=Nol9 PE=1 SV=1	2	2	2	80.8	466.5	578.2	792.1	32.7	148	70.8
High	O08553	Dihydropyrimidinase-related protein 2 OS=Mus musculus OX=10090 GN=Dpysl2 PE=1 SV=2	3	4	3	62.2	69.3	67	160.6	203.5	89.8	268.3
High	Q5I2A0	Serine protease inhibitor A3G OS=Mus musculus OX=10090 GN=Serpina3g PE=1 SV=2	2	4	1	49	93.2	100.5	88.5	15.6	14.9	20.7
High	P01749	Ig heavy chain V region 3 OS=Mus musculus OX=10090 GN=Ighv1-61 PE=1 SV=1	2	7	1	13	82.2	78.9	90.2	81.5	70.3	69
High	P62331	ADP-ribosylation factor 6 OS=Mus musculus OX=10090 GN=Arf6 PE=1 SV=2	2	3	2	20.1	125.5	144.9	172.2	105.9	66.4	61.2
High	Q99N50	Synaptotagmin-like protein 2 OS=Mus musculus OX=10090 GN=Sytl2 PE=1 SV=2	3	3	3	106.7	7.2	4.5	11.7	553.8	105.8	250
High	O35491	Dual specificity protein kinase CLK2 OS=Mus musculus OX=10090 GN=Clk2 PE=1 SV=2	3	3	3	60	56.3	110.4	132.2	16.8	14.2	79
High	P24547	Inosine-5'-monophosphate dehydrogenase 2 OS=Mus musculus OX=10090 GN=Impdh2 PE=1 SV=2	3	3	3	55.8	139.3	200.8	375.8	54	67.6	122.4
High	Q99MN1	Lysine--tRNA ligase OS=Mus musculus OX=10090 GN=Kars1 PE=1 SV=1	3	3	3	67.8	127.4	168.9	331.9	69.1	75.8	128.6
High	O08528	Hexokinase-2 OS=Mus musculus OX=10090 GN=Hk2 PE=1 SV=1	2	2	2	102.5	18.3	18.3	21.5	41.4	81.7	73.2
High	Q9QYA2	Mitochondrial import receptor subunit TOM40 homolog OS=Mus musculus OX=10090 GN=Tomm40 PE=1 SV=3	2	2	2	37.9	162.3	201.7	262.3	60.8	68	61.9
High	Q9D1A2	Cytosolic non-specific dipeptidase OS=Mus musculus OX=10090 GN=Cndp2 PE=1 SV=1	2	3	2	52.7	33.4	41.2	68.3	31.8	65.1	57.1
High	Q8BJ90	Zinc finger protein 771 OS=Mus musculus OX=10090 GN=Znf771 PE=2 SV=1	3	3	3	35.7	150.3	269.8	275.4	41.9	30.7	33.9
High	Q8R3C0	Mini-chromosome maintenance complex-binding protein OS=Mus musculus OX=10090 GN=Mcmbp PE=1 SV=1	3	4	3	72.8	29.1	53.9	57.1	4.7	20.2	11
High	P99027	60S acidic ribosomal protein P2 OS=Mus musculus OX=10090 GN=Rplp2 PE=1 SV=3	1	2	1	11.6	187.2	234	492.6	158.8	109.7	321.9
High	P97290	Plasma protease C1 inhibitor OS=Mus musculus OX=10090 GN=Serping1 PE=1 SV=3	3	4	3	55.5	220.8	216.8	253.9	232.8	256.8	235.9
High	Q61074	Protein phosphatase 1G OS=Mus musculus OX=10090 GN=Ppm1g PE=1 SV=3	4	5	4	58.7	390.2	552.8	749.3	256.8	209.7	232.4
High	P23953	Carboxylesterase 1C OS=Mus musculus OX=10090 GN=Ces1c PE=1 SV=4	1	3	1	61	107.6	102.7	133.8	131.5	85.4	94.3
High	Q9WTP6	Adenylate kinase 2, mitochondrial OS=Mus musculus OX=10090 GN=Ak2 PE=1 SV=5	3	4	3	26.5	72	65.8	246.6	88.3	53.9	146.4
High	P35175	Stefin-1 OS=Mus musculus OX=10090 GN=Stfa1 PE=3 SV=1	3	3	3	11	9.2	6	19	23.3	91.5	375.4
High	Q8R0S2	IQ motif and SEC7 domain-containing protein 1 OS=Mus musculus OX=10090 GN=Iqsec1 PE=1 SV=2	3	4	3	107.9	121.5	198.9	167.7	54.3	39.6	82.7
High	Q99K48	Non-POU domain-containing octamer-binding protein OS=Mus musculus OX=10090 GN=Nono PE=1 SV=3	3	3	2	54.5	128.8	120.1	242.7	89.8	53.3	108
High	Q9QXK7	Cleavage and polyadenylation specificity factor subunit 3 OS=Mus musculus OX=10090 GN=Cpsf3 PE=1 SV=2	2	2	2	77.5	57.8	94.6	115.5	2.2	16	7.8
High	Q8R050	Eukaryotic peptide chain release factor GTP-binding subunit ERF3A OS=Mus musculus OX=10090 GN=Gspt1 PE=1 SV=2	2	2	2	68.6	272.9	367.7	466.7	250.7	216.2	313.1
High	Q99LX0	Parkinson disease protein 7 homolog OS=Mus musculus OX=10090 GN=Park7 PE=1 SV=1	4	4	4	20	398.2	357.2	742.7	389.5	239.7	427.6
High	Q9CS00	Cactin OS=Mus musculus OX=10090 GN=Cactin PE=1 SV=2	3	3	3	90.6	211.6	566.7	434.8	31.2	25.5	38.6
High	Q4V9W2	Protein SREK1IP1 OS=Mus musculus OX=10090 GN=Srek1ip1 PE=1 SV=1	3	3	3	18.1	74	144.6	145.9	2.5	4.1
High	P49312	Heterogeneous nuclear ribonucleoprotein A1 OS=Mus musculus OX=10090 GN=Hnrnpa1 PE=1 SV=2	2	2	2	34.2	125.4	84.9	310.1	53.2	60.8	155.2
High	Q8R081	Heterogeneous nuclear ribonucleoprotein L OS=Mus musculus OX=10090 GN=Hnrnpl PE=1 SV=2	2	2	2	63.9	301.1	209.7	334.3	186.2	180.3	183.2
High	O08582	GTP-binding protein 1 OS=Mus musculus OX=10090 GN=Gtpbp1 PE=1 SV=2	3	3	3	72.3	191.6	166.2	204.5	94.6	122.2	117.6
High	P59708	Splicing factor 3B subunit 6 OS=Mus musculus OX=10090 GN=Sf3b6 PE=1 SV=1	2	4	2	14.6	170.6	138.3	179.5	26.3	35.6	56.6
High	Q9CQQ7	ATP synthase F(0) complex subunit B1, mitochondrial OS=Mus musculus OX=10090 GN=Atp5pb PE=1 SV=1	2	3	2	28.9	528.8	702.1	972.7	309.1	342.7	418.6
High	Q8BG32	26S proteasome non-ATPase regulatory subunit 11 OS=Mus musculus OX=10090 GN=Psmd11 PE=1 SV=3	3	3	3	47.4	77.3	119.4	235	65.7	79.3	108.1
High	Q9DBG3	AP-2 complex subunit beta OS=Mus musculus OX=10090 GN=Ap2b1 PE=1 SV=1	3	3	3	104.5	244.8	287.5	470.2	159.3	140.1	141.9
High	Q8R323	Replication factor C subunit 3 OS=Mus musculus OX=10090 GN=Rfc3 PE=1 SV=1	3	3	3	40.5	45.8	81.4	85.4	10.3	15.6	15.7
High	P55097	Cathepsin K OS=Mus musculus OX=10090 GN=Ctsk PE=1 SV=2	4	4	4	36.9	217.6	134.9	332.6	552.3	184.8	1228.5
High	Q8BU30	Isoleucine--tRNA ligase, cytoplasmic OS=Mus musculus OX=10090 GN=Iars1 PE=1 SV=2	3	4	3	144.2	87.3	128.5	218.7	75.7	109.3	98.1
High	P18181	CD48 antigen OS=Mus musculus OX=10090 GN=Cd48 PE=1 SV=1	3	3	3	27.4	18.2	79.6	661.3	22.6	23.2	42.6
High	Q8C0C7	Phenylalanine--tRNA ligase alpha subunit OS=Mus musculus OX=10090 GN=Farsa PE=1 SV=1	2	2	2	57.6	315.6	451.9	501.1	43.7	35.9	27.5
High	Q9ESX5	H/ACA ribonucleoprotein complex subunit DKC1 OS=Mus musculus OX=10090 GN=Dkc1 PE=1 SV=4	2	2	2	57.4	51.6	42.7	64.1	80	123	125.8
High	Q63943	Myocyte-specific enhancer factor 2D OS=Mus musculus OX=10090 GN=Mef2d PE=1 SV=2	2	2	2	55	118.4	209.1	179.3	27.3	89.7	84.7
High	Q8BH61	Coagulation factor XIII A chain OS=Mus musculus OX=10090 GN=F13a1 PE=1 SV=3	3	3	3	83.2	8	10.9	27.5	6	178.9	150.5
High	Q8BTI8	Serine/arginine repetitive matrix protein 2 OS=Mus musculus OX=10090 GN=Srrm2 PE=1 SV=3	2	3	2	294.7	250.5	212.9	272.3	6.1	3.7	7.8
High	Q62203	Splicing factor 3A subunit 2 OS=Mus musculus OX=10090 GN=Sf3a2 PE=1 SV=2	2	2	2	49.9
High	Q99KN1	Arrestin domain-containing protein 1 OS=Mus musculus OX=10090 GN=Arrdc1 PE=1 SV=2	3	3	3	46.3	127.9	128.5	144	198.6	316.7	284.6
High	P97770	THUMP domain-containing protein 3 OS=Mus musculus OX=10090 GN=Thumpd3 PE=1 SV=1	3	3	3	56.4	89.7	116.4	134.6	110.2	157	495.6
High	Q9CRA5	Golgi phosphoprotein 3 OS=Mus musculus OX=10090 GN=Golph3 PE=1 SV=1	2	2	2	33.7	15.6	15.5	25.6	34.2	8.2	13.6
High	P11087	Collagen alpha-1(I) chain OS=Mus musculus OX=10090 GN=Col1a1 PE=1 SV=4	4	7	4	137.9	128.1	149	163.8	135.8	117	110.1
High	Q80Y14	Glutaredoxin-related protein 5, mitochondrial OS=Mus musculus OX=10090 GN=Glrx5 PE=1 SV=2	1	2	1	16.3	56.5	51.4	113.5	17.9	10.6	22.5
High	Q61749	Translation initiation factor eIF-2B subunit delta OS=Mus musculus OX=10090 GN=Eif2b4 PE=1 SV=2	2	2	2	57.6	22.4	23.1	31	11	13.9	13.7
High	Q8K0Q5	Rho GTPase-activating protein 18 OS=Mus musculus OX=10090 GN=Arhgap18 PE=1 SV=1	2	2	2	74.9
High	Q6DFW4	Nucleolar protein 58 OS=Mus musculus OX=10090 GN=Nop58 PE=1 SV=1	2	3	2	60.3	180.4	144.9	186.9	32.3	51.7	47.9
High	P61164	Alpha-centractin OS=Mus musculus OX=10090 GN=Actr1a PE=1 SV=1	3	3	3	42.6	197.1	331.9	552.2	312.8	221.3	247.6
High	Q922Q4	Pyrroline-5-carboxylate reductase 2 OS=Mus musculus OX=10090 GN=Pycr2 PE=1 SV=1	2	2	2	33.6	116.1	122.2	141.7	9.6	13.6	16.7
High	Q9DCF9	Translocon-associated protein subunit gamma OS=Mus musculus OX=10090 GN=Ssr3 PE=1 SV=1	2	3	2	21.1	36	38.3	49.1	18.2	24.3	18.8
High	P26443	Glutamate dehydrogenase 1, mitochondrial OS=Mus musculus OX=10090 GN=Glud1 PE=1 SV=1	2	2	2	61.3	37.2	39.3	94.1	59.7	18.8	74.9
High	P04945	Ig kappa chain V-VI region NQ2-6.1 OS=Mus musculus OX=10090 PE=2 SV=1	1	1	1	11.7	75	79.5	76.6	70.6	70.6	60.8
High	P61514	60S ribosomal protein L37a OS=Mus musculus OX=10090 GN=Rpl37a PE=1 SV=2	2	3	2	10.3	1607.2	1685.9	2404.4	37.5	89.4	31.7
High	Q9D1C9	Ribosomal RNA-processing protein 7 homolog A OS=Mus musculus OX=10090 GN=Rrp7a PE=2 SV=1	3	3	3	32.4	394.7	366.9	451.1	21.9	61.9	18.8
High	Q9CPS7	RNA-binding protein PNO1 OS=Mus musculus OX=10090 GN=Pno1 PE=1 SV=1	2	2	2	27.4	52.6	63.1	70.4	3.4	7.6	2.5
High	Q5NBY9	POZ (BTB) and AT hook-containing zinc finger 1 OS=Mus musculus OX=10090 GN=Patz1 PE=1 SV=1	3	3	3	74.1	117.3	123.1	169.7	19.8	19.7	30.7
High	Q6P5E4	UDP-glucose:glycoprotein glucosyltransferase 1 OS=Mus musculus OX=10090 GN=Uggt1 PE=1 SV=4	2	2	2	176.3
High	Q6ZQ08	CCR4-NOT transcription complex subunit 1 OS=Mus musculus OX=10090 GN=Cnot1 PE=1 SV=2	3	3	3	266.6
High	P57776	Elongation factor 1-delta OS=Mus musculus OX=10090 GN=Eef1d PE=1 SV=3	2	2	2	31.3	73.3	87.7	223.2	48.8	60.8	64.9
High	Q5BLK4	Terminal uridylyltransferase 7 OS=Mus musculus OX=10090 GN=Tut7 PE=1 SV=3	2	2	2	169	246.1	340.7	316	37.5	34.4	30.3
High	Q9CRB9	MICOS complex subunit Mic19 OS=Mus musculus OX=10090 GN=Chchd3 PE=1 SV=1	3	3	3	26.3	41.7	46.6	81.5	29.4	13	26.7
High	Q6NSQ7	Protein LTV1 homolog OS=Mus musculus OX=10090 GN=Ltv1 PE=1 SV=2	2	2	2	54	45.2	55.7	95.2	10.1	6.4	10.3
High	O54946	DnaJ homolog subfamily B member 6 OS=Mus musculus OX=10090 GN=Dnajb6 PE=1 SV=4	2	2	2	39.8	46.3	50.3	67.5	11.9	8	18.7
High	Q68FL6	Methionine--tRNA ligase, cytoplasmic OS=Mus musculus OX=10090 GN=Mars1 PE=1 SV=1	2	2	2	101.4	27.9	35.8	56.1	15	24	17.3
High	Q9Z0H3	SWI/SNF-related matrix-associated actin-dependent regulator of chromatin subfamily B member 1 OS=Mus musculus OX=10090 GN=Smarcb1 PE=1 SV=1	2	2	2	44.1	32.1	40.1	54.1	9.6	12.2	16.2
High	O88874	Cyclin-K OS=Mus musculus OX=10090 GN=Ccnk PE=1 SV=3	2	3	2	61.3	184.4	249.2	351.5	19	28.3	35.2
High	P61620	Protein transport protein Sec61 subunit alpha isoform 1 OS=Mus musculus OX=10090 GN=Sec61a1 PE=1 SV=2	3	3	3	52.2	108.4	132	228.6	81.6	70.8	85.6
High	Q8K4Z5	Splicing factor 3A subunit 1 OS=Mus musculus OX=10090 GN=Sf3a1 PE=1 SV=1	2	2	2	88.5	237.1	177.6	310.2	38.5	40.6	55
High	Q61176	Arginase-1 OS=Mus musculus OX=10090 GN=Arg1 PE=1 SV=1	2	4	2	34.8	717.1	377.9	1385.1	641.4	564.7	678.1
High	A2AWP8	Rho guanine nucleotide exchange factor 10-like protein OS=Mus musculus OX=10090 GN=Arhgef10l PE=1 SV=1	2	2	2	139.9	286.5	258.4	272.3	85.8	97.9	28.5
High	P53996	CCHC-type zinc finger nucleic acid binding protein OS=Mus musculus OX=10090 GN=Cnbp PE=1 SV=2	2	2	2	19.6	24.1	23.5	32.3		11.1	9.1
High	Q9WVF7	DNA polymerase epsilon catalytic subunit A OS=Mus musculus OX=10090 GN=Pole PE=1 SV=3	3	3	3	261.9	16.5	18.3	31.1		4.1	49.6
High	Q921E6	Polycomb protein EED OS=Mus musculus OX=10090 GN=Eed PE=1 SV=1	2	2	2	50.2	178.4	200.2	183.8	47.2	142.4	139.6
High	P70441	Na(+)/H(+) exchange regulatory cofactor NHE-RF1 OS=Mus musculus OX=10090 GN=Slc9a3r1 PE=1 SV=3	3	3	3	38.6	29.5	37.3	111.4	145.4	107.9	257.1
High	Q922K7	Probable 28S rRNA (cytosine-C(5))-methyltransferase OS=Mus musculus OX=10090 GN=Nop2 PE=1 SV=1	4	5	4	86.7	326.2	164.8	372.6	14.4	21.5	20.8
High	Q8BRF7	Sec1 family domain-containing protein 1 OS=Mus musculus OX=10090 GN=Scfd1 PE=1 SV=1	2	2	2	72.3	59.2	65	89.4	32.7	43.9	37
High	P51807	Dynein light chain Tctex-type 1 OS=Mus musculus OX=10090 GN=Dynlt1 PE=1 SV=1	1	1	1	12.5	60.3	90.2	102.3	33.5	47.7	47.3
High	Q8VE97	Serine/arginine-rich splicing factor 4 OS=Mus musculus OX=10090 GN=Srsf4 PE=2 SV=1	2	3	2	55.9	324.8	391.4	393.6	72.2	146.4	83.3
High	Q9WVE8	Protein kinase C and casein kinase substrate in neurons protein 2 OS=Mus musculus OX=10090 GN=Pacsin2 PE=1 SV=1	4	4	4	55.8	164.8	190.9	254.6	188.4	216.2	455.2
High	Q9D1Q6	Endoplasmic reticulum resident protein 44 OS=Mus musculus OX=10090 GN=Erp44 PE=1 SV=1	2	2	2	46.8	32	25.6	54.2	147.5	121.1	161.4
High	Q9R190	Metastasis-associated protein MTA2 OS=Mus musculus OX=10090 GN=Mta2 PE=1 SV=1	2	2	1	75	35.2	42.8	73.4	7.7	17	15.1
High	Q8R0G9	Nuclear pore complex protein Nup133 OS=Mus musculus OX=10090 GN=Nup133 PE=1 SV=2	2	2	2	128.5	92	125.9	174.4	24.1	19.7	24.3
High	Q8R404	MICOS complex subunit MIC13 OS=Mus musculus OX=10090 GN=Micos13 PE=1 SV=1	2	2	2	13.4	98.6	128.4	158.4	33.6	35.1	24.4
High	P36552	Oxygen-dependent coproporphyrinogen-III oxidase, mitochondrial OS=Mus musculus OX=10090 GN=Cpox PE=1 SV=2	2	2	2	49.7	31.3	32.1	94.7	4.8		9.8
High	P70388	DNA repair protein RAD50 OS=Mus musculus OX=10090 GN=Rad50 PE=1 SV=1	3	3	3	153.4
High	P01674	Ig kappa chain V-III region PC 2154 OS=Mus musculus OX=10090 PE=1 SV=1	1	5	1	11.7	324.2	302.4	328.7	300.9	260.6	248.3
High	P01663	Ig kappa chain V-III region PC 4050 OS=Mus musculus OX=10090 PE=1 SV=1	1	1	1	12	91	67.8	80.3	84.5	57.4	61.6
High	Q923D2	Flavin reductase (NADPH) OS=Mus musculus OX=10090 GN=Blvrb PE=1 SV=3	2	2	2	22.2	92	125.5	474.9	36.3	24.5	76.9
High	Q9R1P4	Proteasome subunit alpha type-1 OS=Mus musculus OX=10090 GN=Psma1 PE=1 SV=1	3	4	3	29.5	106.3	102.9	312.4	97.1	86.1	117.6
High	Q8BRG8	Transmembrane protein 209 OS=Mus musculus OX=10090 GN=Tmem209 PE=2 SV=1	1	1	1	62.9	35.6	39	57.3	5.2
High	P05132	cAMP-dependent protein kinase catalytic subunit alpha OS=Mus musculus OX=10090 GN=Prkaca PE=1 SV=3	2	3	2	40.5	292	406.9	506.9	984.8	334.1	623
High	P54276	DNA mismatch repair protein Msh6 OS=Mus musculus OX=10090 GN=Msh6 PE=1 SV=3	3	3	3	151	37.6	52.3	59.4	19.3	29.3	17.8
High	P47964	60S ribosomal protein L36 OS=Mus musculus OX=10090 GN=Rpl36 PE=1 SV=2	3	7	3	12.2	205.3	159.5	242.8	21.7	164.2	53.4
High	Q8VDM4	26S proteasome non-ATPase regulatory subunit 2 OS=Mus musculus OX=10090 GN=Psmd2 PE=1 SV=1	3	3	3	100.1	210.4	332.6	453	152	171.7	180.4
High	P46935	E3 ubiquitin-protein ligase NEDD4 OS=Mus musculus OX=10090 GN=Nedd4 PE=1 SV=3	3	3	3	102.6
High	Q60604	Scinderin OS=Mus musculus OX=10090 GN=Scin PE=1 SV=3	2	2	2	80.2	18.7	31.9	115.1	199	29.1	146.5
High	Q9CYN2	Signal peptidase complex subunit 2 OS=Mus musculus OX=10090 GN=Spcs2 PE=1 SV=1	2	2	2	25	13.5	23.8	66.5	7.2	6.6	10.1
High	O70503	Very-long-chain 3-oxoacyl-CoA reductase OS=Mus musculus OX=10090 GN=Hsd17b12 PE=1 SV=1	2	2	2	34.7	116.4	159.7	211.2	229.4	150.3	244
High	Q922Q2	Serine/threonine-protein kinase RIO1 OS=Mus musculus OX=10090 GN=Riok1 PE=1 SV=2	2	2	2	64.9	36.4	110.6	156.3
High	Q3TBD2	Rho GTPase-activating protein 45 OS=Mus musculus OX=10090 GN=Arhgap45 PE=1 SV=2	2	3	2	122.8	112.3	136.1	180.7	109.7	143.2	197.2
High	Q9Z1B5	Mitotic spindle assembly checkpoint protein MAD2A OS=Mus musculus OX=10090 GN=Mad2l1 PE=1 SV=2	2	2	2	23.6	152.3	183	236.4	21.9	52.1	34.9
High	O08709	Peroxiredoxin-6 OS=Mus musculus OX=10090 GN=Prdx6 PE=1 SV=3	3	3	3	24.9	113.1	131.5	293.2	104	122.6	396.1
High	O08573	Galectin-9 OS=Mus musculus OX=10090 GN=Lgals9 PE=1 SV=1	2	2	2	40	116.4	204.9	550.7	74.9	75.8	70.3
High	P48774	Glutathione S-transferase Mu 5 OS=Mus musculus OX=10090 GN=Gstm5 PE=1 SV=1	2	3	2	26.6	117.2	196.8	250.5	24.9	21.8	24.9
High	Q8BTZ4	Anaphase-promoting complex subunit 5 OS=Mus musculus OX=10090 GN=Anapc5 PE=1 SV=1	1	1	1	83
High	P63028	Translationally-controlled tumor protein OS=Mus musculus OX=10090 GN=Tpt1 PE=1 SV=1	2	2	2	19.5	97.9	121	404.6	125	67	131
High	Q9JIX8	Apoptotic chromatin condensation inducer in the nucleus OS=Mus musculus OX=10090 GN=Acin1 PE=1 SV=3	2	2	2	150.6	360.1	307.8	406.7	56.7	93.2	79
High	Q9DCE5	p21-activated protein kinase-interacting protein 1 OS=Mus musculus OX=10090 GN=Pak1ip1 PE=1 SV=2	3	3	3	42.1	210.5	203.5	231.1	18.6	57.6	42.2
High	Q91YK2	Ribosomal RNA processing protein 1 homolog B OS=Mus musculus OX=10090 GN=Rrp1b PE=1 SV=2	2	3	2	80.5	147.2	99.1	130.8	10.9	23.4	12.2
High	Q61081	Hsp90 co-chaperone Cdc37 OS=Mus musculus OX=10090 GN=Cdc37 PE=1 SV=1	2	2	2	44.6	119.2	136.3	251.5	64.2	307.1	256.6
High	P16254	Signal recognition particle 14 kDa protein OS=Mus musculus OX=10090 GN=Srp14 PE=1 SV=1	3	3	3	12.5	242.7	279.4	417.1	397.8	311.6	351.1
High	P26638	Serine--tRNA ligase, cytoplasmic OS=Mus musculus OX=10090 GN=Sars1 PE=1 SV=3	3	3	3	58.4	26.8	25	58.8	48.2	23	32.6
High	Q8BSY0	Aspartyl/asparaginyl beta-hydroxylase OS=Mus musculus OX=10090 GN=Asph PE=1 SV=1	2	2	2	83
High	Q6PFD9	Nuclear pore complex protein Nup98-Nup96 OS=Mus musculus OX=10090 GN=Nup98 PE=1 SV=2	2	3	2	197.1
High	Q64310	Surfeit locus protein 4 OS=Mus musculus OX=10090 GN=Surf4 PE=1 SV=1	2	3	2	30.4	31.8	37.6	67.2	17.8	25.7	27.8
High	P01592	Immunoglobulin J chain OS=Mus musculus OX=10090 GN=Jchain PE=1 SV=4	3	4	3	18	69.4	59	73.9	55.3	50.9	50.5
High	Q8JZQ2	AFG3-like protein 2 OS=Mus musculus OX=10090 GN=Afg3l2 PE=1 SV=1	2	2	2	89.5	145.2	162.8	220.5	33.8	36.7	42.9
High	Q61599	Rho GDP-dissociation inhibitor 2 OS=Mus musculus OX=10090 GN=Arhgdib PE=1 SV=3	2	2	2	22.8	32.8	48.3	131.1	78.4	42.2	149.2
High	P97371	Proteasome activator complex subunit 1 OS=Mus musculus OX=10090 GN=Psme1 PE=1 SV=2	2	2	2	28.7	21.7	34.5	86	21.2	25.2	36.9
High	Q8JZQ9	Eukaryotic translation initiation factor 3 subunit B OS=Mus musculus OX=10090 GN=Eif3b PE=1 SV=1	2	3	2	91.3	49.8	64.5	151.2	30.4	48.4	65.7
High	Q921I1	Serotransferrin OS=Mus musculus OX=10090 GN=Tf PE=1 SV=1	3	3	3	76.7	313.7	147	391.8	141.6	122.8	212.8
High	P20108	Thioredoxin-dependent peroxide reductase, mitochondrial OS=Mus musculus OX=10090 GN=Prdx3 PE=1 SV=1	2	2	2	28.1	106.2	156.9	295.7	13.4	15.2	34.9
High	Q8BZ09	Mitochondrial 2-oxodicarboxylate carrier OS=Mus musculus OX=10090 GN=Slc25a21 PE=1 SV=1	3	3	3	33.2	177.8	249	247.3	18.5	48	18.3
High	Q60854	Serpin B6 OS=Mus musculus OX=10090 GN=Serpinb6 PE=1 SV=1	1	1	1	42.6
High	P07310	Creatine kinase M-type OS=Mus musculus OX=10090 GN=Ckm PE=1 SV=1	2	2	2	43	114.4	21.7	43.1	4.2	5.1	7.7
High	Q9D2N9	Vacuolar protein sorting-associated protein 33A OS=Mus musculus OX=10090 GN=Vps33a PE=1 SV=2	1	1	1	67.5
High	Q99JI4	26S proteasome non-ATPase regulatory subunit 6 OS=Mus musculus OX=10090 GN=Psmd6 PE=1 SV=1	3	3	3	45.5	46.2	59.2	131.8	44.4	36.9	54.6
High	Q63932	Dual specificity mitogen-activated protein kinase kinase 2 OS=Mus musculus OX=10090 GN=Map2k2 PE=1 SV=2	2	2	2	44.4	126.7	191.2	241.8	55.1	52.2	46.1
High	Q8K301	Probable ATP-dependent RNA helicase DDX52 OS=Mus musculus OX=10090 GN=Ddx52 PE=2 SV=2	2	2	2	67.4	139.7	113.6	119.4	32.1	33.6	77.9
High	O08677	Kininogen-1 OS=Mus musculus OX=10090 GN=Kng1 PE=1 SV=1	2	3	2	73.1	57.3	74.1	80.9	62.7	81.7	66.1
High	P62869	Elongin-B OS=Mus musculus OX=10090 GN=Elob PE=1 SV=1	3	3	3	13.2	278.1	417.6	454.7	91	69.2	80.1
High	P08553	Neurofilament medium polypeptide OS=Mus musculus OX=10090 GN=Nefm PE=1 SV=4	2	2	1	95.9
High	Q8JZM0	Dimethyladenosine transferase 1, mitochondrial OS=Mus musculus OX=10090 GN=Tfb1m PE=1 SV=1	3	4	3	38.9	383.7	411.4	442.2	133	173.6	216.3
High	O08688	Calpain-5 OS=Mus musculus OX=10090 GN=Capn5 PE=1 SV=1	2	2	2	72.9		8.4	9.3	54.8	16.3	30.9
High	Q8BL97	Serine/arginine-rich splicing factor 7 OS=Mus musculus OX=10090 GN=Srsf7 PE=1 SV=1	3	3	3	30.8
High	Q11011	Puromycin-sensitive aminopeptidase OS=Mus musculus OX=10090 GN=Npepps PE=1 SV=2	4	4	4	103.3	118	118.7	202	70.4	85	99.1
High	Q9CQS5	Serine/threonine-protein kinase RIO2 OS=Mus musculus OX=10090 GN=Riok2 PE=1 SV=1	2	3	2	62.5	45.7	50.8	66.6	4.5	13.7	6.4
High	Q9Z0Y1	Dynactin subunit 3 OS=Mus musculus OX=10090 GN=Dctn3 PE=1 SV=2	2	2	2	21	93.8	137.6	186	120.7	86.6	96.3
High	O70293	G protein-coupled receptor kinase 6 OS=Mus musculus OX=10090 GN=Grk6 PE=1 SV=1	3	3	3	65.9
High	Q8K0E8	Fibrinogen beta chain OS=Mus musculus OX=10090 GN=Fgb PE=1 SV=1	2	2	2	54.7	53.9	45.5	76.5	35.4	62.7	46.4
High	Q9JKB3	Y-box-binding protein 3 OS=Mus musculus OX=10090 GN=Ybx3 PE=1 SV=2	2	3	1	38.8	61.3	85.1	149.1
High	P28656	Nucleosome assembly protein 1-like 1 OS=Mus musculus OX=10090 GN=Nap1l1 PE=1 SV=2	2	3	1	45.3
High	Q8BG05	Heterogeneous nuclear ribonucleoprotein A3 OS=Mus musculus OX=10090 GN=Hnrnpa3 PE=1 SV=1	1	3	1	39.6	70.9	62.5	123.3	89.3	53.8	121.7
High	Q9D8M4	60S ribosomal protein L7-like 1 OS=Mus musculus OX=10090 GN=Rpl7l1 PE=1 SV=1	1	1	1	28.5	39.9	34.9	57.3	4.1	5.2	7.2
High	P24369	Peptidyl-prolyl cis-trans isomerase B OS=Mus musculus OX=10090 GN=Ppib PE=1 SV=2	2	4	2	23.7	94.8	89.4	198.8	405.8	166.2	354.6
High	P70404	Isocitrate dehydrogenase [NAD] subunit gamma 1, mitochondrial OS=Mus musculus OX=10090 GN=Idh3g PE=1 SV=1	1	1	1	42.8
High	Q00623	Apolipoprotein A-I OS=Mus musculus OX=10090 GN=Apoa1 PE=1 SV=2	3	3	3	30.6	57.7	52.1	68.8	39.5	19.5	24.2
High	Q8BX10	Serine/threonine-protein phosphatase PGAM5, mitochondrial OS=Mus musculus OX=10090 GN=Pgam5 PE=1 SV=1	2	2	2	32	76.9	100.9	119.9	16.2	23.8	13.4
High	Q9DBY8	Nuclear valosin-containing protein-like OS=Mus musculus OX=10090 GN=Nvl PE=1 SV=1	1	1	1	94.4	54.8	43.2	63.7		14.6	5.8
High	A2BE28	Ribosomal biogenesis protein LAS1L OS=Mus musculus OX=10090 GN=Las1l PE=1 SV=1	1	1	1	89.4	18.2	27.9	33.7	18.3	55.7	28
High	Q99PM9	Uridine-cytidine kinase 2 OS=Mus musculus OX=10090 GN=Uck2 PE=1 SV=1	2	2	2	29.4	41.5	39.3	72.8	6.2	17.3	12.5
High	Q924K8	Metastasis-associated protein MTA3 OS=Mus musculus OX=10090 GN=Mta3 PE=1 SV=1	3	3	2	67
High	Q99LX5	Multiple myeloma tumor-associated protein 2 homolog OS=Mus musculus OX=10090 GN=Mmtag2 PE=2 SV=1	2	3	2	29.3	103.7	158.3	169.9	9.3	35.9	11.5
High	Q6PDH0	Pleckstrin homology-like domain family B member 1 OS=Mus musculus OX=10090 GN=Phldb1 PE=1 SV=1	4	4	4	150
High	Q689Z5	Protein strawberry notch homolog 1 OS=Mus musculus OX=10090 GN=Sbno1 PE=1 SV=2	2	2	2	153.6	66.1	81.1	75.8	22.9	56.7	16
High	Q9R0Q3	Transmembrane emp24 domain-containing protein 2 OS=Mus musculus OX=10090 GN=Tmed2 PE=1 SV=1	2	3	2	22.7	54.7	39.4	145.4	70.5	46.3	106.2
High	Q922Q8	Leucine-rich repeat-containing protein 59 OS=Mus musculus OX=10090 GN=Lrrc59 PE=1 SV=1	2	2	2	34.9	36.7	36.8	71.7	52.8	42.7	98.7
High	P63085	Mitogen-activated protein kinase 1 OS=Mus musculus OX=10090 GN=Mapk1 PE=1 SV=3	2	2	1	41.2
High	P52430	Serum paraoxonase/arylesterase 1 OS=Mus musculus OX=10090 GN=Pon1 PE=1 SV=2	2	2	2	39.5	44.3	50.5	72.1	67.7	80.7	64.5
High	P49962	Signal recognition particle 9 kDa protein OS=Mus musculus OX=10090 GN=Srp9 PE=1 SV=2	2	4	2	10.2	103.7	136.8	158.4	73.8	96.6	83.3
High	Q9DCJ7	Aurora kinase A-interacting protein OS=Mus musculus OX=10090 GN=Aurkaip1 PE=2 SV=2	2	3	2	23.3	223.1	295.8	365.1	15.8	11.1	17.1
High	P62996	Transformer-2 protein homolog beta OS=Mus musculus OX=10090 GN=Tra2b PE=1 SV=1	4	4	4	33.6	121.2	205.1	224.3	44.4	189.1	30
High	P63094	Guanine nucleotide-binding protein G(s) subunit alpha isoforms short OS=Mus musculus OX=10090 GN=Gnas PE=1 SV=1	2	2	2	45.6	42.4	44.1	74.4	39.9	22.3	29.4
High	Q9EQU5	Protein SET OS=Mus musculus OX=10090 GN=Set PE=1 SV=1	2	2	2	33.4	81.4	99.9	246.1	74.9	96.6	219.1
High	P23492	Purine nucleoside phosphorylase OS=Mus musculus OX=10090 GN=Pnp PE=1 SV=2	2	2	2	32.3	224	283.7	624.7	78.3	122	155.1
High	Q99JF8	PC4 and SFRS1-interacting protein OS=Mus musculus OX=10090 GN=Psip1 PE=1 SV=1	2	2	2	59.7	62.5	56.4	65.5	6.4	7.9	9.9
High	P27870	Proto-oncogene vav OS=Mus musculus OX=10090 GN=Vav1 PE=1 SV=1	2	2	2	98.1	138.2	203.1	209.7	110.3	182.6	125.1
High	Q91V61	Sideroflexin-3 OS=Mus musculus OX=10090 GN=Sfxn3 PE=1 SV=1	1	1	1	35.4	49.4	58	60	108	23.6	47.8
High	Q6P5D8	Structural maintenance of chromosomes flexible hinge domain-containing protein 1 OS=Mus musculus OX=10090 GN=Smchd1 PE=1 SV=2	1	1	1	225.5	26.4	34.8	43.9	7.4	8.7	11.2
High	Q8BMD8	Calcium-binding mitochondrial carrier protein SCaMC-1 OS=Mus musculus OX=10090 GN=Slc25a24 PE=1 SV=1	2	2	2	52.9	55.2	231.1	201.5	28.7	28.5	35
High	Q02614	SAP30-binding protein OS=Mus musculus OX=10090 GN=Sap30bp PE=1 SV=2	2	2	2	33.8	263.7	377.8	503.8	18.5	43.8	15.6
High	Q6PAR5	GTPase-activating protein and VPS9 domain-containing protein 1 OS=Mus musculus OX=10090 GN=Gapvd1 PE=1 SV=2	2	2	2	162.3	83.3	142.5	161.8	20.8	38.4	36.7
High	Q9CX11	rRNA-processing protein UTP23 homolog OS=Mus musculus OX=10090 GN=Utp23 PE=2 SV=1	4	4	4	28.4	353.5	337.8	435.8	33	145.5	36.4
High	Q9WUA2	Phenylalanine--tRNA ligase beta subunit OS=Mus musculus OX=10090 GN=Farsb PE=1 SV=2	3	3	3	65.7	123.7	155.9	194.7	54.5	58.9	66.8
High	E9Q5C9	Nucleolar and coiled-body phosphoprotein 1 OS=Mus musculus OX=10090 GN=Nolc1 PE=1 SV=1	2	2	2	73.7	173	194.3	333.4	4.6	6.3	8.1
High	O08547	Vesicle-trafficking protein SEC22b OS=Mus musculus OX=10090 GN=Sec22b PE=1 SV=3	1	1	1	24.7
High	Q9D1I6	39S ribosomal protein L14, mitochondrial OS=Mus musculus OX=10090 GN=Mrpl14 PE=1 SV=1	1	1	1	15.9	76.8	69.9	125.6	5.1	7.8	7.4
High	Q9QYF1	Retinol dehydrogenase 11 OS=Mus musculus OX=10090 GN=Rdh11 PE=1 SV=2	1	1	1	35.1
High	Q60766	Immunity-related GTPase family M protein 1 OS=Mus musculus OX=10090 GN=Irgm1 PE=1 SV=1	1	1	1	46.5	24.6	55.3	60.8	2.3	22.3	5.6
High	O08788	Dynactin subunit 1 OS=Mus musculus OX=10090 GN=Dctn1 PE=1 SV=3	1	1	1	141.6
High	P14069	Protein S100-A6 OS=Mus musculus OX=10090 GN=S100a6 PE=1 SV=3	3	3	3	10	28.6	20.8	37.6	142.1	81.7	160.1
High	Q8K284	General transcription factor 3C polypeptide 1 OS=Mus musculus OX=10090 GN=Gtf3c1 PE=1 SV=2	3	3	3	237.3
High	P00493	Hypoxanthine-guanine phosphoribosyltransferase OS=Mus musculus OX=10090 GN=Hprt1 PE=1 SV=3	3	3	3	24.6	104.9	125.1	277.1	92.2	120.9	173.1
High	Q9D394	Protein RUFY3 OS=Mus musculus OX=10090 GN=Rufy3 PE=1 SV=1	1	1	1	53
High	Q64433	10 kDa heat shock protein, mitochondrial OS=Mus musculus OX=10090 GN=Hspe1 PE=1 SV=2	3	3	3	11	126.9	173.8	501.4	108.3	70.5	286.9
High	P35276	Ras-related protein Rab-3D OS=Mus musculus OX=10090 GN=Rab3d PE=1 SV=1	2	3	1	24.4	18.4	24.2	28.2	24.1	26.8	19
High	Q9JLJ2	4-trimethylaminobutyraldehyde dehydrogenase OS=Mus musculus OX=10090 GN=Aldh9a1 PE=1 SV=1	2	2	2	53.5	83.2	91.7	172.3	78.9	61.7	88.4
High	P32921	Tryptophan--tRNA ligase, cytoplasmic OS=Mus musculus OX=10090 GN=Wars1 PE=1 SV=2	2	2	2	54.3	141.9	151.5	206.4	192.8	177	120.3
High	Q9JI44	DNA methyltransferase 1-associated protein 1 OS=Mus musculus OX=10090 GN=Dmap1 PE=1 SV=1	2	2	2	53.1
High	Q6GQT9	Nodal modulator 1 OS=Mus musculus OX=10090 GN=Nomo1 PE=1 SV=1	2	2	2	133.3	12	19.9	33.6	11.8	11.1	17.8
High	Q9D4J7	PHD finger protein 6 OS=Mus musculus OX=10090 GN=Phf6 PE=1 SV=1	2	3	2	41.1
High	Q61550	Double-strand-break repair protein rad21 homolog OS=Mus musculus OX=10090 GN=Rad21 PE=1 SV=3	2	2	2	72
High	Q8BTU1	Cilia- and flagella-associated protein 20 OS=Mus musculus OX=10090 GN=Cfap20 PE=1 SV=1	3	4	3	22.7	104.6	123.4	173.7	167.6	66.6	57.1
High	Q6PGG6	Guanine nucleotide-binding protein-like 3-like protein OS=Mus musculus OX=10090 GN=Gnl3l PE=1 SV=1	2	2	2	65.2	115.1	118.9	155.3	5.7	13.2	3.6
High	Q91YJ5	Translation initiation factor IF-2, mitochondrial OS=Mus musculus OX=10090 GN=Mtif2 PE=1 SV=2	2	2	2	81.2	38.3	33.8	52.8	6	6	6.1
High	Q9R1P0	Proteasome subunit alpha type-4 OS=Mus musculus OX=10090 GN=Psma4 PE=1 SV=1	2	2	2	29.5	49.4	50.1	140.3	103.3	57.9	104
High	Q5SSK3	Transcription elongation factor, mitochondrial OS=Mus musculus OX=10090 GN=Tefm PE=1 SV=1	2	3	2	41.8	90.3	95.3	120.7	14.8	130.7	31.2
High	Q01768	Nucleoside diphosphate kinase B OS=Mus musculus OX=10090 GN=Nme2 PE=1 SV=1	2	2	2	17.4	11	24.3	65.5	24.3	17.2	44.4
High	P54823	Probable ATP-dependent RNA helicase DDX6 OS=Mus musculus OX=10090 GN=Ddx6 PE=1 SV=1	2	2	2	54.2	86.3	93.7	112.8	121.5	124	161.9
High	Q9DBG7	Signal recognition particle receptor subunit alpha OS=Mus musculus OX=10090 GN=Srpra PE=1 SV=1	2	2	2	69.6	14.1	29.5	32.2	6.7	9.4	12.5
High	O88700	Bloom syndrome protein homolog OS=Mus musculus OX=10090 GN=Blm PE=1 SV=1	1	1	1	158.3
High	Q9JK83	Partitioning defective 6 homolog beta OS=Mus musculus OX=10090 GN=Pard6b PE=1 SV=2	1	1	1	41
High	Q9R112	Sulfide:quinone oxidoreductase, mitochondrial OS=Mus musculus OX=10090 GN=Sqor PE=1 SV=3	1	1	1	50.3
High	P19157	Glutathione S-transferase P 1 OS=Mus musculus OX=10090 GN=Gstp1 PE=1 SV=2	1	1	1	23.6	19.3	25.5	41.1	23.8	22.2	25.8
High	P08207	Protein S100-A10 OS=Mus musculus OX=10090 GN=S100a10 PE=1 SV=2	1	1	1	11.2	17.1	10.8	37.1	44.5	55.5	47
High	A0A0B4J1G0	Low affinity immunoglobulin gamma Fc region receptor III-A OS=Mus musculus OX=10090 GN=Fcgr4 PE=1 SV=1	2	2	2	28.4	83.6	164.9	132.5	5.5	55	30.4
High	Q8VCT3	Aminopeptidase B OS=Mus musculus OX=10090 GN=Rnpep PE=1 SV=2	2	2	2	72.4
High	Q9QZB7	Actin-related protein 10 OS=Mus musculus OX=10090 GN=Actr10 PE=1 SV=2	2	2	2	46.2	10.5	34.9	91.4	17.9	10	16.1
High	Q9D1M0	Protein SEC13 homolog OS=Mus musculus OX=10090 GN=Sec13 PE=1 SV=3	2	2	2	35.5	58.2	73.5	119.4	19.2	21.6	30.2
High	P30416	Peptidyl-prolyl cis-trans isomerase FKBP4 OS=Mus musculus OX=10090 GN=Fkbp4 PE=1 SV=5	2	2	2	51.5
High	Q60749	KH domain-containing, RNA-binding, signal transduction-associated protein 1 OS=Mus musculus OX=10090 GN=Khdrbs1 PE=1 SV=2	2	2	2	48.3	121.2	135.7	248.1	27.5	31.8	48.7
High	Q8CAQ8	MICOS complex subunit Mic60 OS=Mus musculus OX=10090 GN=Immt PE=1 SV=1	2	2	2	83.8	82.9	140.7	202.6	56.4	37.4	54.3
High	Q8R3N1	Nucleolar protein 14 OS=Mus musculus OX=10090 GN=Nop14 PE=1 SV=2	2	2	2	98.7	245.8	138.9	327.2	4.1	4.5	6.4
High	P05784	Keratin, type I cytoskeletal 18 OS=Mus musculus OX=10090 GN=Krt18 PE=1 SV=5	3	16	1	47.5
High	Q9CX86	Heterogeneous nuclear ribonucleoprotein A0 OS=Mus musculus OX=10090 GN=Hnrnpa0 PE=1 SV=1	1	1	1	30.5
High	Q8BHX3	Borealin OS=Mus musculus OX=10090 GN=Cdca8 PE=1 SV=2	1	1	1	32.2	139.2	103.1	115	5.3	4.5	3.5
High	Q7TPH6	E3 ubiquitin-protein ligase MYCBP2 OS=Mus musculus OX=10090 GN=Mycbp2 PE=1 SV=3	2	2	2	520.9	12	17.7	15	25.5	51.9	21.6
High	Q8CD10	Calcium uptake protein 2, mitochondrial OS=Mus musculus OX=10090 GN=Micu2 PE=1 SV=2	1	1	1	49.4
High	P63082	V-type proton ATPase 16 kDa proteolipid subunit c OS=Mus musculus OX=10090 GN=Atp6v0c PE=1 SV=1	2	3	2	15.8	86.9	81	201.4	69.8	67.7	128.9
High	P32067	Lupus La protein homolog OS=Mus musculus OX=10090 GN=Ssb PE=1 SV=1	3	3	3	47.7	125.8	157.1	314.1	77	60.4	68.5
High	Q3UV70	[Pyruvate dehydrogenase [acetyl-transferring]]-phosphatase 1, mitochondrial OS=Mus musculus OX=10090 GN=Pdp1 PE=1 SV=1	1	1	1	61.1
High	Q9ESP1	Stromal cell-derived factor 2-like protein 1 OS=Mus musculus OX=10090 GN=Sdf2l1 PE=1 SV=2	2	3	2	23.6	206.9	186.2	258.4	295.3	378.5	261.6
High	P61967	AP-1 complex subunit sigma-1A OS=Mus musculus OX=10090 GN=Ap1s1 PE=1 SV=1	1	1	1	18.7	27.4	30	52.2	8.6	18.3	26
High	P10107	Annexin A1 OS=Mus musculus OX=10090 GN=Anxa1 PE=1 SV=2	2	2	2	38.7	37.8	37.5	46.5	60.8	51.7	93.8
High	P03976	Ig kappa chain V-II region 17S29.1 OS=Mus musculus OX=10090 PE=1 SV=1	1	2	1	12.4	105.1	99	106.9	91.8	82.4	92.5
High	P62305	Small nuclear ribonucleoprotein E OS=Mus musculus OX=10090 GN=Snrpe PE=1 SV=1	2	2	2	10.8	214.9	222.8	360.7	75.8	44.6	72.7
High	Q8BSA9	tRNA wybutosine-synthesizing protein 3 homolog OS=Mus musculus OX=10090 GN=Tyw3 PE=1 SV=1	1	1	1	28.6
High	P58468	Ribosome biogenesis protein SLX9 homolog OS=Mus musculus OX=10090 GN=Slx9 PE=1 SV=1	1	1	1	24.8	38.9	32.3	54.8			24
High	Q8BWG8	Beta-arrestin-1 OS=Mus musculus OX=10090 GN=Arrb1 PE=1 SV=1	3	3	2	46.9
High	Q61001	Laminin subunit alpha-5 OS=Mus musculus OX=10090 GN=Lama5 PE=1 SV=4	3	3	3	403.8	27.2	29.1	51.1	348.6	145.8	370
High	Q9JHS4	ATP-dependent Clp protease ATP-binding subunit clpX-like, mitochondrial OS=Mus musculus OX=10090 GN=Clpx PE=1 SV=2	2	2	2	69.2	150	176.2	240.2	15.1	24.9	14.7
High	Q9QXE7	F-box-like/WD repeat-containing protein TBL1X OS=Mus musculus OX=10090 GN=Tbl1x PE=1 SV=2	1	1	1	56.8
High	P70677	Caspase-3 OS=Mus musculus OX=10090 GN=Casp3 PE=1 SV=1	2	2	2	31.5	41.7	26.4	49.7	17.9	17.3	28.2
High	P08103	Tyrosine-protein kinase HCK OS=Mus musculus OX=10090 GN=Hck PE=1 SV=4	2	4	1	59.1
High	Q80Y20	Alkylated DNA repair protein alkB homolog 8 OS=Mus musculus OX=10090 GN=Alkbh8 PE=1 SV=1	2	2	2	74.7	192.6	178	200.2	4.7	24	6.1
High	P11031	Activated RNA polymerase II transcriptional coactivator p15 OS=Mus musculus OX=10090 GN=Sub1 PE=1 SV=3	2	2	2	14.4	184.8	175.3	243.8	113.9	123.6	240.4
High	Q99L43	Phosphatidate cytidylyltransferase 2 OS=Mus musculus OX=10090 GN=Cds2 PE=1 SV=1	2	2	2	51.3	31.2	31.2	34.8	28.6	15	16.9
High	Q9QZV9	NTF2-related export protein 1 OS=Mus musculus OX=10090 GN=Nxt1 PE=1 SV=2	1	1	1	15.8	109	125.1	114.5	5.5	3.7	6
High	P61089	Ubiquitin-conjugating enzyme E2 N OS=Mus musculus OX=10090 GN=Ube2n PE=1 SV=1	2	2	2	17.1	66.5	58.9	155.5	63.5	46.8	145.5
High	Q65Z40	Wings apart-like protein homolog OS=Mus musculus OX=10090 GN=Wapl PE=1 SV=2	2	2	2	134	84.2	144	185.5	6.7	12.2	15.7
High	Q9CRC8	Leucine-rich repeat-containing protein 40 OS=Mus musculus OX=10090 GN=Lrrc40 PE=1 SV=2	1	1	1	68	44.6	62.2	69.8	4.7	14.1	7.3
High	E9Q555	E3 ubiquitin-protein ligase RNF213 OS=Mus musculus OX=10090 GN=Rnf213 PE=1 SV=3	2	2	2	583.9
High	Q9Z2I9	Succinate--CoA ligase [ADP-forming] subunit beta, mitochondrial OS=Mus musculus OX=10090 GN=Sucla2 PE=1 SV=2	2	2	2	50.1	27.8	27.1	33.6	11.9	23.9	17.4
High	Q9JL26	Formin-like protein 1 OS=Mus musculus OX=10090 GN=Fmnl1 PE=1 SV=1	2	2	2	122
High	Q8CHK3	Lysophospholipid acyltransferase 7 OS=Mus musculus OX=10090 GN=Mboat7 PE=1 SV=1	1	1	1	53.4	8.2	12.4	19.6	46.5	26.1	39
High	Q9D3N8	Growth hormone-regulated TBC protein 1 OS=Mus musculus OX=10090 GN=Grtp1 PE=1 SV=1	1	1	1	40.6
High	Q8CGK3	Lon protease homolog, mitochondrial OS=Mus musculus OX=10090 GN=Lonp1 PE=1 SV=2	2	2	2	105.8	62.1	78.4	123.2	32.5	30.2	39.8
High	P23116	Eukaryotic translation initiation factor 3 subunit A OS=Mus musculus OX=10090 GN=Eif3a PE=1 SV=5	1	1	1	161.8	21.1	19.6	55.6	10.7	20.1	22.7
High	P70398	Probable ubiquitin carboxyl-terminal hydrolase FAF-X OS=Mus musculus OX=10090 GN=Usp9x PE=1 SV=2	2	2	2	290.5	20.4	38.9	53.9	27.9	39.3	41.6
High	Q9D3W4	GPN-loop GTPase 3 OS=Mus musculus OX=10090 GN=Gpn3 PE=2 SV=1	1	1	1	32.8
High	Q6PDM2	Serine/arginine-rich splicing factor 1 OS=Mus musculus OX=10090 GN=Srsf1 PE=1 SV=3	2	2	2	27.7	30.8	26.8	50	18.2	17.9	27.5
High	Q8BVF7	Gamma-secretase subunit APH-1A OS=Mus musculus OX=10090 GN=Aph1a PE=1 SV=2	1	1	1	29	33	43.6	77	47.3	36	31
High	Q6ZWQ7	Signal peptidase complex subunit 3 OS=Mus musculus OX=10090 GN=Spcs3 PE=1 SV=1	2	2	2	20.3	233.2	233.3	419.5	139.7	89.8	113.3
High	Q9WUH5	Tripartite motif-containing protein 10 OS=Mus musculus OX=10090 GN=Trim10 PE=2 SV=2	2	2	2	55.6
High	Q8K212	Phosphofurin acidic cluster sorting protein 1 OS=Mus musculus OX=10090 GN=Pacs1 PE=1 SV=2	1	2	1	104.8
High	O08734	Bcl-2 homologous antagonist/killer OS=Mus musculus OX=10090 GN=Bak1 PE=1 SV=3	1	2	1	23.3
High	Q9D3D9	ATP synthase subunit delta, mitochondrial OS=Mus musculus OX=10090 GN=Atp5f1d PE=1 SV=1	1	1	1	17.6	19.7	21.3	48	12	8.7	23.7
High	Q923G2	DNA-directed RNA polymerases I, II, and III subunit RPABC3 OS=Mus musculus OX=10090 GN=Polr2h PE=1 SV=3	1	2	1	17.1
High	Q2VPQ9	Chromatin modification-related protein MEAF6 OS=Mus musculus OX=10090 GN=Meaf6 PE=1 SV=1	1	1	1	21.6
High	P21844	Chymase OS=Mus musculus OX=10090 GN=Cma1 PE=1 SV=2	2	2	2	27.6	83.6	59.4	70.5	412.8	130.6	238.8
High	P61963	DDB1- and CUL4-associated factor 7 OS=Mus musculus OX=10090 GN=Dcaf7 PE=1 SV=1	1	1	1	38.9	58.6	107.1	70.7	12.9	14.8	18.8
High	Q9CR68	Cytochrome b-c1 complex subunit Rieske, mitochondrial OS=Mus musculus OX=10090 GN=Uqcrfs1 PE=1 SV=1	2	2	2	29.3	122.5	160.8	215.6	38.2	26.4	29.7
High	Q3URQ0	Testis-expressed protein 10 OS=Mus musculus OX=10090 GN=Tex10 PE=1 SV=1	2	2	2	105.1	31.5	38.1	43	5.6	6.9	12.1
High	Q8VI93	2'-5'-oligoadenylate synthase 3 OS=Mus musculus OX=10090 GN=Oas3 PE=1 SV=1	3	4	3	126.3	33.3	62.6	54.7	1.7	24.6	2.5
High	O70194	Eukaryotic translation initiation factor 3 subunit D OS=Mus musculus OX=10090 GN=Eif3d PE=1 SV=2	3	3	3	63.9	76	71.6	150.5	21.7	18.8	48.5
High	Q5SWU9	Acetyl-CoA carboxylase 1 OS=Mus musculus OX=10090 GN=Acaca PE=1 SV=1	2	2	2	265.1	31.2	52.3	59.8	21.6	35.7	25.1
High	Q8CB87	Ras-related protein Rab-44 OS=Mus musculus OX=10090 GN=Rab44 PE=1 SV=2	1	1	1	106.3	18.6	30.7	18.9	24.3	5	12
High	P24270	Catalase OS=Mus musculus OX=10090 GN=Cat PE=1 SV=4	2	2	2	59.8	207.3	112.4	400.9	167.3	108.2	145
High	Q9JMD0	BUB3-interacting and GLEBS motif-containing protein ZNF207 OS=Mus musculus OX=10090 GN=Znf207 PE=1 SV=1	2	2	2	52.8	280.5	220.4	247.5	498.9	509.2	733.2
High	Q9CZM2	60S ribosomal protein L15 OS=Mus musculus OX=10090 GN=Rpl15 PE=1 SV=4	2	4	2	24.1	330.8	424.2	755.2	129.6	141.6	303.9
High	Q9JKX3	Transferrin receptor protein 2 OS=Mus musculus OX=10090 GN=Tfr2 PE=1 SV=2	2	4	2	88.3
High	P70195	Proteasome subunit beta type-7 OS=Mus musculus OX=10090 GN=Psmb7 PE=1 SV=1	2	2	2	29.9	59.5	54.3	202.9	43.2	40.8	57.8
High	Q6A026	Sister chromatid cohesion protein PDS5 homolog A OS=Mus musculus OX=10090 GN=Pds5a PE=1 SV=3	1	1	1	150.2
High	Q80US4	Actin-related protein 5 OS=Mus musculus OX=10090 GN=Actr5 PE=1 SV=3	2	3	2	67.8
High	Q99104	Unconventional myosin-Va OS=Mus musculus OX=10090 GN=Myo5a PE=1 SV=2	2	2	2	215.4
High	Q9D0R2	Threonine--tRNA ligase 1, cytoplasmic OS=Mus musculus OX=10090 GN=Tars1 PE=1 SV=2	3	3	2	83.3	20.8	20.3	31.7	17.6	16.2	53.9
High	Q9CY64	Biliverdin reductase A OS=Mus musculus OX=10090 GN=Blvra PE=1 SV=1	3	3	3	33.5	40.4	48.6	39.7	7.6	11.5	10.4
High	Q9DC63	F-box only protein 3 OS=Mus musculus OX=10090 GN=Fbxo3 PE=1 SV=1	2	2	2	55.2
High	Q9JHR7	Insulin-degrading enzyme OS=Mus musculus OX=10090 GN=Ide PE=1 SV=1	2	2	2	117.7	77.5	61.2	180.7	63.7	54.5	76
High	Q9Z2E1	Methyl-CpG-binding domain protein 2 OS=Mus musculus OX=10090 GN=Mbd2 PE=2 SV=2	1	1	1	43.5	28.5	26.7	58.5	3	7.9	5.2
High	Q8BJS4	SUN domain-containing protein 2 OS=Mus musculus OX=10090 GN=Sun2 PE=1 SV=3	1	1	1	81.6
High	Q0VBL3	RNA-binding protein 15 OS=Mus musculus OX=10090 GN=Rbm15 PE=1 SV=1	1	1	1	105.7
High	Q6ZQJ5	DNA replication ATP-dependent helicase/nuclease DNA2 OS=Mus musculus OX=10090 GN=Dna2 PE=1 SV=2	2	2	2	119.4	225.3	241.1	288.1	13.2	39.3	19.5
High	O54950	5'-AMP-activated protein kinase subunit gamma-1 OS=Mus musculus OX=10090 GN=Prkag1 PE=1 SV=2	2	2	2	37.5	195.9	212.8	278.3	90.5	75	88.2
High	Q9CZ83	39S ribosomal protein L55, mitochondrial OS=Mus musculus OX=10090 GN=Mrpl55 PE=1 SV=1	1	2	1	15.1	53.2	25.4	44.4	2.8	2.4
High	Q8R1Q8	Cytoplasmic dynein 1 light intermediate chain 1 OS=Mus musculus OX=10090 GN=Dync1li1 PE=1 SV=1	2	2	2	56.6	17.3	18.5	23.1	11.9	17.9	16.8
High	P46638	Ras-related protein Rab-11B OS=Mus musculus OX=10090 GN=Rab11b PE=1 SV=3	2	3	2	24.5	251.8	313.6	416.1	192.8	161.7	302.2
High	Q64516	Glycerol kinase OS=Mus musculus OX=10090 GN=Gk PE=1 SV=2	2	2	2	61.2	26.4	32.5	42.6	9.2	11	9.2
High	Q61704	Inter-alpha-trypsin inhibitor heavy chain H3 OS=Mus musculus OX=10090 GN=Itih3 PE=1 SV=3	1	1	1	99.3
High	P58742	Aladin OS=Mus musculus OX=10090 GN=Aaas PE=1 SV=1	1	1	1	59.4	29.5	22.4	38.1	13.2	21.4	14.1
High	Q922R8	Protein disulfide-isomerase A6 OS=Mus musculus OX=10090 GN=Pdia6 PE=1 SV=3	2	2	2	48.1	113.7	93.4	201.3	201.8	187.9	274.4
High	Q8C7V3	U3 small nucleolar RNA-associated protein 15 homolog OS=Mus musculus OX=10090 GN=Utp15 PE=1 SV=1	2	3	2	59.3	38.2	31.7	28.5	5.7	33.3	20
High	Q78IK2	ATP synthase membrane subunit K, mitochondrial OS=Mus musculus OX=10090 GN=Atp5mk PE=1 SV=1	1	1	1	6.4	19.3	28.8	45.9	11.5	15.4	18.1
High	Q9CQG2	RNA N6-adenosine-methyltransferase METTL16 OS=Mus musculus OX=10090 GN=Mettl16 PE=1 SV=1	1	1	1	62.3
High	Q9D7Z3	Nucleolar protein 7 OS=Mus musculus OX=10090 GN=Nol7 PE=1 SV=1	1	1	1	29	59.6	74.4	155.8	2.9
High	P18531	Ig heavy chain V region 3-6 OS=Mus musculus OX=10090 GN=Ighv3-6 PE=1 SV=1	1	1	1	13.1	159.1	167.6	167.4	161.5	201.1	184.2
High	Q8K2H4	Arf-GAP with coiled-coil, ANK repeat and PH domain-containing protein 1 OS=Mus musculus OX=10090 GN=Acap1 PE=1 SV=1	1	1	1	81.7
High	Q921G6	Leucine-rich repeat and calponin homology domain-containing protein 4 OS=Mus musculus OX=10090 GN=Lrch4 PE=1 SV=1	1	1	1	73.1
High	Q9CPP0	Nucleoplasmin-3 OS=Mus musculus OX=10090 GN=Npm3 PE=1 SV=3	2	2	2	19
High	Q07235	Glia-derived nexin OS=Mus musculus OX=10090 GN=Serpine2 PE=1 SV=2	1	1	1	44.2			3.6	7.2	60.3	62.2
High	Q6P9N1	Hyccin OS=Mus musculus OX=10090 GN=Fam126a PE=1 SV=3	2	2	2	57.3
High	Q9JI13	Something about silencing protein 10 OS=Mus musculus OX=10090 GN=Utp3 PE=1 SV=1	2	2	2	53.4	298.9	186.8	393	9.2	13.4	9.2
High	Q9Z110	Delta-1-pyrroline-5-carboxylate synthase OS=Mus musculus OX=10090 GN=Aldh18a1 PE=1 SV=2	2	2	2	87.2	107.1	57.2	75.2	31.6	30.1	49.8
High	Q00PI9	Heterogeneous nuclear ribonucleoprotein U-like protein 2 OS=Mus musculus OX=10090 GN=Hnrnpul2 PE=1 SV=2	2	2	2	84.9	319.3	283.2	380.4	48.9	28.4	51.2
High	Q9D924	Iron-sulfur cluster assembly 1 homolog, mitochondrial OS=Mus musculus OX=10090 GN=Isca1 PE=2 SV=1	1	1	1	14.2
High	P01630	Ig kappa chain V-II region 7S34.1 OS=Mus musculus OX=10090 PE=1 SV=1	2	2	2	12.5
High	Q07076	Annexin A7 OS=Mus musculus OX=10090 GN=Anxa7 PE=1 SV=2	2	2	2	49.9
High	P05532	Mast/stem cell growth factor receptor Kit OS=Mus musculus OX=10090 GN=Kit PE=1 SV=3	2	2	1	109.3	17	18.1	47.2	217.7	31.3	79.7
High	Q99MK9	Ras association domain-containing protein 1 OS=Mus musculus OX=10090 GN=Rassf1 PE=1 SV=1	1	1	1	38.8
High	Q9CY50	Translocon-associated protein subunit alpha OS=Mus musculus OX=10090 GN=Ssr1 PE=1 SV=1	1	1	1	32	52.1	49.4	87.4	29.7	27.4	40.7
High	Q6PDI5	Proteasome adapter and scaffold protein ECM29 OS=Mus musculus OX=10090 GN=Ecpas PE=1 SV=3	1	1	1	203.6
High	Q91Z38	Tetratricopeptide repeat protein 1 OS=Mus musculus OX=10090 GN=Ttc1 PE=1 SV=1	1	1	1	33.2
High	Q3U1G5	Interferon-stimulated 20 kDa exonuclease-like 2 OS=Mus musculus OX=10090 GN=Isg20l2 PE=1 SV=2	2	2	2	41	108.7	82.1	171.2	9.3	27.5	20.7
High	Q9R0P6	Signal peptidase complex catalytic subunit SEC11A OS=Mus musculus OX=10090 GN=Sec11a PE=1 SV=1	2	3	2	20.6	200.6	184.2	275.5	103.7	68.9	97.5
High	P47857	ATP-dependent 6-phosphofructokinase, muscle type OS=Mus musculus OX=10090 GN=Pfkm PE=1 SV=3	2	2	1	85.2
High	Q99LC9	Peroxisome assembly factor 2 OS=Mus musculus OX=10090 GN=Pex6 PE=1 SV=1	1	1	1	104.5
High	P08556	GTPase NRas OS=Mus musculus OX=10090 GN=Nras PE=1 SV=1	2	3	1	21.2
High	Q8K411	Presequence protease, mitochondrial OS=Mus musculus OX=10090 GN=Pitrm1 PE=1 SV=1	2	2	2	117.3	231.2	182.2	394	56.9	43.1	90.1
High	Q8BIF9	Zinc finger protein 787 OS=Mus musculus OX=10090 GN=Znf787 PE=2 SV=3	1	1	1	40.5
High	Q6PDQ2	Chromodomain-helicase-DNA-binding protein 4 OS=Mus musculus OX=10090 GN=Chd4 PE=1 SV=1	2	3	2	217.6	116.5	134.2	183	211.9	178.3	227.7
High	Q9CQ22	Ragulator complex protein LAMTOR1 OS=Mus musculus OX=10090 GN=Lamtor1 PE=1 SV=1	1	1	1	17.7	9.4	21.8	131.6	9.2	5.4	6.7
High	Q8R4N0	Citramalyl-CoA lyase, mitochondrial OS=Mus musculus OX=10090 GN=Clybl PE=1 SV=2	2	2	2	37.5	59	88.4	114.5	4.9	1.8	10.3
High	P52875	Transmembrane protein 165 OS=Mus musculus OX=10090 GN=Tmem165 PE=1 SV=2	1	1	1	34.8
High	Q64514	Tripeptidyl-peptidase 2 OS=Mus musculus OX=10090 GN=Tpp2 PE=1 SV=3	3	3	3	139.8	13.8	21.4	36.6	19.1	29.3	32.2
High	P42209	Septin-1 OS=Mus musculus OX=10090 GN=Septin1 PE=1 SV=2	2	2	2	42	174.9	228.4	325.8	39.7	76	76.7
High	P41317	Mannose-binding protein C OS=Mus musculus OX=10090 GN=Mbl2 PE=1 SV=2	1	1	1	25.9
High	P62874	Guanine nucleotide-binding protein G(I)/G(S)/G(T) subunit beta-1 OS=Mus musculus OX=10090 GN=Gnb1 PE=1 SV=3	2	2	1	37.4	31.9	20.8	127.9	30	31.2	74
High	P26350	Prothymosin alpha OS=Mus musculus OX=10090 GN=Ptma PE=1 SV=2	1	2	1	12.2	100	275.9	435.6	138.1	26.5	392.3
High	P34022	Ran-specific GTPase-activating protein OS=Mus musculus OX=10090 GN=Ranbp1 PE=1 SV=2	1	3	1	23.6	29.6	45.7	83.3	30.3	37.1	44.1
High	Q924W5	Structural maintenance of chromosomes protein 6 OS=Mus musculus OX=10090 GN=Smc6 PE=1 SV=1	1	1	1	127.1
High	P04184	Thymidine kinase, cytosolic OS=Mus musculus OX=10090 GN=Tk1 PE=1 SV=3	1	1	1	25.8	34	71.6	68.5	2.3	4.7
High	P17710	Hexokinase-1 OS=Mus musculus OX=10090 GN=Hk1 PE=1 SV=3	1	2	1	108.2	20.8	39.3	67.2	66.7	26.3	65.3
High	P51859	Hepatoma-derived growth factor OS=Mus musculus OX=10090 GN=Hdgf PE=1 SV=2	2	2	2	26.3	522.4	549.5	768.7	108.7	123.3	199.8
High	Q8C4J7	Transducin beta-like protein 3 OS=Mus musculus OX=10090 GN=Tbl3 PE=2 SV=1	1	2	1	88.2
High	Q80T69	Lysine-specific demethylase 9 OS=Mus musculus OX=10090 GN=Rsbn1 PE=1 SV=3	2	2	2	89.2	117.9	104.8	133.8	146.4	108.2	92.2
High	Q9JKM7	Ras-related protein Rab-37 OS=Mus musculus OX=10090 GN=Rab37 PE=1 SV=2	2	2	2	24.6	12	9.2	15.9	135.9	27.3	64.6
High	Q78PY7	Staphylococcal nuclease domain-containing protein 1 OS=Mus musculus OX=10090 GN=Snd1 PE=1 SV=1	2	3	2	102	55.8	65.7	125.2	60.4	52.4	92.9
High	P70290	55 kDa erythrocyte membrane protein OS=Mus musculus OX=10090 GN=Mpp1 PE=1 SV=1	2	3	2	52.2	120.2	196.4	270.8	17.1	33.9	21.5
High	P06745	Glucose-6-phosphate isomerase OS=Mus musculus OX=10090 GN=Gpi PE=1 SV=4	2	2	2	62.7	12.4	10.7	29.4	30.9	24.9	80.3
High	Q9WUM4	Coronin-1C OS=Mus musculus OX=10090 GN=Coro1c PE=1 SV=2	2	2	2	53.1	11.8	47.8	174.3	20.5	11	20.4
High	Q6P1B1	Xaa-Pro aminopeptidase 1 OS=Mus musculus OX=10090 GN=Xpnpep1 PE=1 SV=1	2	2	2	69.5
High	Q9CSN1	SNW domain-containing protein 1 OS=Mus musculus OX=10090 GN=Snw1 PE=1 SV=3	1	1	1	61.4	39.3	31.7	45.4	6.6		5.6
High	Q9D7N3	28S ribosomal protein S9, mitochondrial OS=Mus musculus OX=10090 GN=Mrps9 PE=1 SV=3	1	1	1	44.9
High	P16546	Spectrin alpha chain, non-erythrocytic 1 OS=Mus musculus OX=10090 GN=Sptan1 PE=1 SV=4	1	1	1	284.4
High	Q99M28	RNA-binding protein with serine-rich domain 1 OS=Mus musculus OX=10090 GN=Rnps1 PE=1 SV=1	1	2	1	34.2	237.9	202.7	258	71.3	91.1	222.9
High	P28650	Adenylosuccinate synthetase isozyme 1 OS=Mus musculus OX=10090 GN=Adss1 PE=1 SV=2	2	2	2	50.2	144.5	31.8	43.4	38	90.5	99.1
High	Q9JIF0	Protein arginine N-methyltransferase 1 OS=Mus musculus OX=10090 GN=Prmt1 PE=1 SV=1	1	1	1	42.4
High	Q9DCH4	Eukaryotic translation initiation factor 3 subunit F OS=Mus musculus OX=10090 GN=Eif3f PE=1 SV=2	2	3	2	38	72.6	81.1	147.3	39.2	48.1	145
High	P14719	Interleukin-1 receptor-like 1 OS=Mus musculus OX=10090 GN=Il1rl1 PE=1 SV=2	1	1	1	64.8	7.5	14.5	28.8	140.9	36.7	74.4
High	Q68FE6	Rho family-interacting cell polarization regulator 1 OS=Mus musculus OX=10090 GN=Ripor1 PE=1 SV=2	2	3	2	132.3
High	Q62018	RNA polymerase-associated protein CTR9 homolog OS=Mus musculus OX=10090 GN=Ctr9 PE=1 SV=2	1	1	1	133.3
High	Q9QY81	Nuclear pore membrane glycoprotein 210 OS=Mus musculus OX=10090 GN=Nup210 PE=1 SV=2	2	2	2	204	80.2	106.6	165.8	14.7	21.2	44.7
High	P97480	Eyes absent homolog 3 OS=Mus musculus OX=10090 GN=Eya3 PE=1 SV=2	1	1	1	55.9
High	Q91XU3	Phosphatidylinositol 5-phosphate 4-kinase type-2 gamma OS=Mus musculus OX=10090 GN=Pip4k2c PE=1 SV=1	2	2	2	47.3	142.2	186.8	260.6	57.4	29.7	76
High	Q99J25	rRNA methyltransferase 1, mitochondrial OS=Mus musculus OX=10090 GN=Mrm1 PE=2 SV=2	2	2	2	34.8
High	Q6ZQH8	Nucleoporin NUP188 OS=Mus musculus OX=10090 GN=Nup188 PE=1 SV=2	2	2	2	196.6
High	Q9CYL5	Golgi-associated plant pathogenesis-related protein 1 OS=Mus musculus OX=10090 GN=Glipr2 PE=1 SV=3	1	1	1	17.1
High	Q9Z2M7	Phosphomannomutase 2 OS=Mus musculus OX=10090 GN=Pmm2 PE=1 SV=1	1	1	1	27.6
High	Q3UMR5	Calcium uniporter protein, mitochondrial OS=Mus musculus OX=10090 GN=Mcu PE=1 SV=2	2	2	2	39.7	43.4	47.5	67.9	41	20.3	28.3
High	Q9JJ80	Ribosome production factor 2 homolog OS=Mus musculus OX=10090 GN=Rpf2 PE=2 SV=2	2	2	2	35.3	36.5	37.5	52.2	64.2	61.2	42
High	Q80XC3	USP6 N-terminal-like protein OS=Mus musculus OX=10090 GN=Usp6nl PE=1 SV=2	2	2	2	93.5
High	Q922M3	BTB/POZ domain-containing adapter for CUL3-mediated RhoA degradation protein 3 OS=Mus musculus OX=10090 GN=Kctd10 PE=1 SV=1	2	2	2	35.7	10	59.9	210.5	4.3	3.2	7.8
High	Q99MU3	Double-stranded RNA-specific adenosine deaminase OS=Mus musculus OX=10090 GN=Adar PE=1 SV=2	2	2	2	130.4	12.6	20.5	31.4	13.3	41.6	21.6
High	P04370	Myelin basic protein OS=Mus musculus OX=10090 GN=Mbp PE=1 SV=2	1	1	1	27.2	24.8	20.1	229.5	41.1	53.4	119.8
High	P81269	Cyclic AMP-dependent transcription factor ATF-1 OS=Mus musculus OX=10090 GN=Atf1 PE=1 SV=1	2	2	2	29.2	76.9	72.3	75.8	219.4	73.8	370.3
High	O08796	Eukaryotic elongation factor 2 kinase OS=Mus musculus OX=10090 GN=Eef2k PE=1 SV=1	2	2	2	81.7	17.3	31.3	39	7.8	7.8	10.7
High	Q9CQ06	39S ribosomal protein L24, mitochondrial OS=Mus musculus OX=10090 GN=Mrpl24 PE=1 SV=1	1	2	1	24.9
High	Q9Z2U1	Proteasome subunit alpha type-5 OS=Mus musculus OX=10090 GN=Psma5 PE=1 SV=1	1	3	1	26.4	27.6	22.1	70.9	14.7	16.6	22.9
High	B2RUP2	Protein unc-13 homolog D OS=Mus musculus OX=10090 GN=Unc13d PE=1 SV=2	1	1	1	123
High	Q8BRT1	CLIP-associating protein 2 OS=Mus musculus OX=10090 GN=Clasp2 PE=1 SV=1	2	2	2	140.7
High	P62307	Small nuclear ribonucleoprotein F OS=Mus musculus OX=10090 GN=Snrpf PE=1 SV=1	1	1	1	9.7
High	Q8VBZ0	Dehydrogenase/reductase SDR family member on chromosome X homolog OS=Mus musculus OX=10090 GN=Dhrsx PE=1 SV=2	1	1	1	35.9
High	Q9DBG6	Dolichyl-diphosphooligosaccharide--protein glycosyltransferase subunit 2 OS=Mus musculus OX=10090 GN=Rpn2 PE=1 SV=1	1	1	1	69	114	126.3	234.7	92.5	55.4	93
High	P70698	CTP synthase 1 OS=Mus musculus OX=10090 GN=Ctps1 PE=1 SV=2	2	2	2	66.6
High	Q9EQH3	Vacuolar protein sorting-associated protein 35 OS=Mus musculus OX=10090 GN=Vps35 PE=1 SV=1	2	3	2	91.7
High	O89051	Integral membrane protein 2B OS=Mus musculus OX=10090 GN=Itm2b PE=1 SV=1	2	2	2	30.2
High	P59108	Copine-2 OS=Mus musculus OX=10090 GN=Cpne2 PE=1 SV=1	2	2	2	61	39.5	45.2	58.3	28.5	32.5	45.3
High	P97807	Fumarate hydratase, mitochondrial OS=Mus musculus OX=10090 GN=Fh PE=1 SV=3	2	3	2	54.3	231.4	221.2	455.7	183.1	197.8	346.1
High	Q8K2P6	Rieske domain-containing protein OS=Mus musculus OX=10090 GN=Rfesd PE=1 SV=1	1	1	1	18	38.7	39.3	47.7	11.7	7.1	17.2
High	O70435	Proteasome subunit alpha type-3 OS=Mus musculus OX=10090 GN=Psma3 PE=1 SV=3	2	2	2	28.4	78.9	62.5	205.8	55.8	56.9	73.6
High	P20491	High affinity immunoglobulin epsilon receptor subunit gamma OS=Mus musculus OX=10090 GN=Fcer1g PE=1 SV=1	1	1	1	9.6	11.8	11.3	24.1	88.7	45.8	58.5
High	Q9QX15	Calcium-activated chloride channel regulator 3A-1 OS=Mus musculus OX=10090 GN=Clca3a1 PE=1 SV=1	1	1	1	100	12.4	48.7	327.6	5.8	6	4.6
High	Q99J77	Sialic acid synthase OS=Mus musculus OX=10090 GN=Nans PE=1 SV=1	2	2	2	40	21.4	14.6	43.2	32.1	12.3	35.5
High	Q2YDW2	Protein misato homolog 1 OS=Mus musculus OX=10090 GN=Msto1 PE=1 SV=1	1	1	1	61.2
High	Q9QZE5	Coatomer subunit gamma-1 OS=Mus musculus OX=10090 GN=Copg1 PE=1 SV=1	1	1	1	97.5
High	Q8CDN6	Thioredoxin-like protein 1 OS=Mus musculus OX=10090 GN=Txnl1 PE=1 SV=3	2	2	2	32.2
High	P58044	Isopentenyl-diphosphate Delta-isomerase 1 OS=Mus musculus OX=10090 GN=Idi1 PE=1 SV=1	2	2	2	26.3	52.3	79.1	97.8	27.3	17.5	27.9
High	Q6ZPF4	Formin-like protein 3 OS=Mus musculus OX=10090 GN=Fmnl3 PE=1 SV=2	2	2	2	117.1	28.2	38.3	44.1	6.2	5.7	8.3
High	O54734	Dolichyl-diphosphooligosaccharide--protein glycosyltransferase 48 kDa subunit OS=Mus musculus OX=10090 GN=Ddost PE=1 SV=2	2	2	2	49	75.6	76.2	217.3	80.5	46.9	116.5
High	P35283	Ras-related protein Rab-12 OS=Mus musculus OX=10090 GN=Rab12 PE=1 SV=3	2	2	2	27.3
High	Q9EST1	Gasdermin-A OS=Mus musculus OX=10090 GN=Gsdma PE=2 SV=1	2	3	2	49.6	532.5	295.8	1645.3	391.3	289.2	437.3
High	Q99N87	28S ribosomal protein S5, mitochondrial OS=Mus musculus OX=10090 GN=Mrps5 PE=1 SV=1	2	2	2	48.2	75.5	70.8	61.8	31.2	195.3	45.3
High	O88895	Histone deacetylase 3 OS=Mus musculus OX=10090 GN=Hdac3 PE=1 SV=2	1	1	1	48.8
High	Q8BG60	Thioredoxin-interacting protein OS=Mus musculus OX=10090 GN=Txnip PE=1 SV=1	1	1	1	44.3
High	Q8K2B3	Succinate dehydrogenase [ubiquinone] flavoprotein subunit, mitochondrial OS=Mus musculus OX=10090 GN=Sdha PE=1 SV=1	2	2	2	72.5	52.4	98.3	181.3	36.4	57.4	61.8
High	O35857	Mitochondrial import inner membrane translocase subunit TIM44 OS=Mus musculus OX=10090 GN=Timm44 PE=1 SV=2	1	2	1	51.1	19.6	22.4	47	10.3	23.9	28.2
High	P30677	Guanine nucleotide-binding protein subunit alpha-14 OS=Mus musculus OX=10090 GN=Gna14 PE=1 SV=2	2	2	1	41.5	22.3	27.1	113.2	17.4	8.3	17.4
High	Q9DB85	Ribosomal RNA-processing protein 8 OS=Mus musculus OX=10090 GN=Rrp8 PE=1 SV=1	1	1	1	51	83.3	57.1	52	8.6	22.3	32.4
High	Q62348	Translin OS=Mus musculus OX=10090 GN=Tsn PE=1 SV=1	1	1	1	26.2	27.6	18	66.9	33.2	23.8	41.4
High	Q8BHN3	Neutral alpha-glucosidase AB OS=Mus musculus OX=10090 GN=Ganab PE=1 SV=1	3	4	3	106.8	129.8	141.9	263.4	95.9	140.3	207.1
High	Q8C0L0	Thioredoxin-related transmembrane protein 4 OS=Mus musculus OX=10090 GN=Tmx4 PE=1 SV=2	1	1	1	37.1
High	Q9QZD8	Mitochondrial dicarboxylate carrier OS=Mus musculus OX=10090 GN=Slc25a10 PE=1 SV=2	1	1	1	31.7	29.9	43.7	70.2	13.3	17.7	21.1
High	P41241	Tyrosine-protein kinase CSK OS=Mus musculus OX=10090 GN=Csk PE=1 SV=2	2	2	2	50.7	40.8	56.6	81.5	24.9	16.1	28.4
High	Q5SX40	Myosin-1 OS=Mus musculus OX=10090 GN=Myh1 PE=1 SV=1	2	3	1	223.2
High	P04940	Ig kappa chain V-VI region NQ2-17.4.1 OS=Mus musculus OX=10090 PE=2 SV=1	2	3	2	11.6	253.5	264.4	296.1	215.7	242.2	197
High	Q8CG50	Ras-related protein Rab-43 OS=Mus musculus OX=10090 GN=Rab43 PE=1 SV=1	1	1	1	23.2	43	63.1	69.9	13.5	10.8	5.2
High	P32233	Developmentally-regulated GTP-binding protein 1 OS=Mus musculus OX=10090 GN=Drg1 PE=1 SV=1	1	1	1	40.5
High	Q6PE01	U5 small nuclear ribonucleoprotein 40 kDa protein OS=Mus musculus OX=10090 GN=Snrnp40 PE=1 SV=1	2	2	2	39.3	152.2	142.5	186.4	73.2	72.6	115.2
High	Q9CTH6	rRNA-processing protein FCF1 homolog OS=Mus musculus OX=10090 GN=Fcf1 PE=2 SV=2	1	1	1	23.3	79.2	97.6	119.9	8.2	10.3	9.7
High	P32883	GTPase KRas OS=Mus musculus OX=10090 GN=Kras PE=1 SV=1	2	3	1	21.6
High	P01723	Ig lambda-1 chain V region OS=Mus musculus OX=10090 PE=1 SV=2	2	4	2	12.2	644.4	623	688.7	562.9	525.2	487.2
High	Q9D1D4	Transmembrane emp24 domain-containing protein 10 OS=Mus musculus OX=10090 GN=Tmed10 PE=1 SV=1	2	2	2	24.9	41.1	29.6	123.8	52	24.3	94.5
High	Q9CW46	Ribonucleoprotein PTB-binding 1 OS=Mus musculus OX=10090 GN=Raver1 PE=1 SV=2	1	1	1	79.3	14.7	14.9	46.6	12.5	10.8	28.1
High	Q8BMC4	Nucleolar protein 9 OS=Mus musculus OX=10090 GN=Nop9 PE=1 SV=1	2	3	2	70	44.3	48.4	62.4		4.2	5.3
High	Q60862	Origin recognition complex subunit 2 OS=Mus musculus OX=10090 GN=Orc2 PE=1 SV=1	1	1	1	65.9
High	O88712	C-terminal-binding protein 1 OS=Mus musculus OX=10090 GN=Ctbp1 PE=1 SV=2	3	3	3	47.7	220.1	316.9	369.5	298.6	260.2	370.7
High	Q3TXS7	26S proteasome non-ATPase regulatory subunit 1 OS=Mus musculus OX=10090 GN=Psmd1 PE=1 SV=1	2	2	2	105.7	28.9	47.2	70.5	14.5	17.2	17
High	Q9R111	Guanine deaminase OS=Mus musculus OX=10090 GN=Gda PE=1 SV=1	2	2	2	51
High	Q8BWY3	Eukaryotic peptide chain release factor subunit 1 OS=Mus musculus OX=10090 GN=Etf1 PE=1 SV=4	2	2	2	49	65.8	69.7	138.3	64.9	60.2	88.9
High	Q3TIV5	Zinc finger CCCH domain-containing protein 15 OS=Mus musculus OX=10090 GN=Zc3h15 PE=1 SV=2	1	2	1	48.3
High	Q9EQK5	Major vault protein OS=Mus musculus OX=10090 GN=Mvp PE=1 SV=4	1	1	1	95.9
High	Q8BUI3	Leucine-rich repeat and WD repeat-containing protein 1 OS=Mus musculus OX=10090 GN=LRWD1 PE=2 SV=1	1	1	1	71.5	25.4	33.7	39.6	4.4	6.6	2.8
High	P11438	Lysosome-associated membrane glycoprotein 1 OS=Mus musculus OX=10090 GN=Lamp1 PE=1 SV=2	1	1	1	43.8	87.1	72.3	280.6	86.2	45	92.6
High	P62915	Transcription initiation factor IIB OS=Mus musculus OX=10090 GN=Gtf2b PE=1 SV=1	2	2	2	34.8
High	P06327	Ig heavy chain V region VH558 A1/A4 OS=Mus musculus OX=10090 GN=Gm5629 PE=2 SV=1	2	5	2	13	733.9	740.6	810.2	766.2	748.1	692.5
High	Q07832	Serine/threonine-protein kinase PLK1 OS=Mus musculus OX=10090 GN=Plk1 PE=1 SV=2	2	3	2	68.3	63.3	72.3	88.4	26.8	37.6	27.4
High	Q8K426	Resistin-like gamma OS=Mus musculus OX=10090 GN=Retnlg PE=1 SV=1	1	1	1	12.5	60.4	58.4	64.5	74.8	58.7	80.8
High	Q8BK72	28S ribosomal protein S27, mitochondrial OS=Mus musculus OX=10090 GN=Mrps27 PE=1 SV=2	1	1	1	47.7	16	21.8	44.3	7.4	7.7	19.7
High	Q8JZS9	39S ribosomal protein L48, mitochondrial OS=Mus musculus OX=10090 GN=Mrpl48 PE=1 SV=1	1	1	1	23.9	172.8	135.7	170.6	5.3	4.7	5.8
High	O35465	Peptidyl-prolyl cis-trans isomerase FKBP8 OS=Mus musculus OX=10090 GN=Fkbp8 PE=1 SV=2	1	1	1	43.5
High	Q8BFY9	Transportin-1 OS=Mus musculus OX=10090 GN=Tnpo1 PE=1 SV=2	2	2	2	102.3	42.5	54	85.1	21.5	23.5	42.2
High	Q99JT2	Serine/threonine-protein kinase 26 OS=Mus musculus OX=10090 GN=Stk26 PE=1 SV=1	1	1	1	46.6	33.7	34.1	50.3	13.7	14.2	22.5
High	Q9CQ39	Mediator of RNA polymerase II transcription subunit 21 OS=Mus musculus OX=10090 GN=Med21 PE=1 SV=1	1	1	1	15.6
High	Q8VCM7	Fibrinogen gamma chain OS=Mus musculus OX=10090 GN=Fgg PE=1 SV=1	2	2	2	49.4	63.4	34.5	55.1	29.8	47.7	45.1
High	Q8BRN9	Coiled-coil and C2 domain-containing protein 1B OS=Mus musculus OX=10090 GN=Cc2d1b PE=1 SV=1	2	5	2	93	22.7	17.1	32.5	26.2	821.7	546
High	P63158	High mobility group protein B1 OS=Mus musculus OX=10090 GN=Hmgb1 PE=1 SV=2	1	1	1	24.9	96.7	124	275.7	279	91.9	282.7
High	Q8VC28	Aldo-keto reductase family 1 member C13 OS=Mus musculus OX=10090 GN=Akr1c13 PE=1 SV=2	1	1	1	37
High	Q61316	Heat shock 70 kDa protein 4 OS=Mus musculus OX=10090 GN=Hspa4 PE=1 SV=1	1	1	1	94.1
High	P11798	Calcium/calmodulin-dependent protein kinase type II subunit alpha OS=Mus musculus OX=10090 GN=Camk2a PE=1 SV=2	1	1	1	54.1	40.3	32.5	120.5	30.8	50.6	60.5
High	P08508	Low affinity immunoglobulin gamma Fc region receptor III OS=Mus musculus OX=10090 GN=Fcgr3 PE=1 SV=1	2	2	2	30	124.4	238.8	288.8	223.9	483.9	152.1
High	Q8BFQ4	WD repeat-containing protein 82 OS=Mus musculus OX=10090 GN=Wdr82 PE=1 SV=1	1	1	1	35.1
High	Q9WU78	Programmed cell death 6-interacting protein OS=Mus musculus OX=10090 GN=Pdcd6ip PE=1 SV=3	1	1	1	96
High	Q61333	Tumor necrosis factor alpha-induced protein 2 OS=Mus musculus OX=10090 GN=Tnfaip2 PE=1 SV=2	1	1	1	78.1
High	O88491	Histone-lysine N-methyltransferase, H3 lysine-36 specific OS=Mus musculus OX=10090 GN=Nsd1 PE=1 SV=1	1	1	1	283.9
High	Q9ESX4	Nucleolar protein of 40 kDa OS=Mus musculus OX=10090 GN=Zcchc17 PE=1 SV=1	1	1	1	27.5
High	Q8C052	Microtubule-associated protein 1S OS=Mus musculus OX=10090 GN=Map1s PE=1 SV=2	1	1	1	102.9	29.8	57.2	81.9	38.3	27.9	38.3
High	Q9JLV5	Cullin-3 OS=Mus musculus OX=10090 GN=Cul3 PE=1 SV=1	1	1	1	88.9
High	E9Q3L2	Phosphatidylinositol 4-kinase alpha OS=Mus musculus OX=10090 GN=Pi4ka PE=1 SV=2	2	2	2	236.9	35.7	41	63.4	7	15.8	14.6
High	Q9JIY5	Serine protease HTRA2, mitochondrial OS=Mus musculus OX=10090 GN=Htra2 PE=1 SV=2	1	1	1	49.3
High	P70303	CTP synthase 2 OS=Mus musculus OX=10090 GN=Ctps2 PE=1 SV=1	2	2	2	65.5
High	Q9CZD3	Glycine--tRNA ligase OS=Mus musculus OX=10090 GN=Gars1 PE=1 SV=1	1	2	1	81.8	41.5	35	50.5	23.9	31.4	35.9
High	Q9D3B1	Very-long-chain (3R)-3-hydroxyacyl-CoA dehydratase 2 OS=Mus musculus OX=10090 GN=Hacd2 PE=1 SV=1	1	1	1	28.4	61.2	98.8	105.2	24.3	61.5	54.4
High	Q8R0F5	RNA-binding motif protein, X-linked 2 OS=Mus musculus OX=10090 GN=Rbmx2 PE=1 SV=1	1	1	1	37.5
High	Q8R3K3	Pentatricopeptide repeat-containing protein 2, mitochondrial OS=Mus musculus OX=10090 GN=Ptcd2 PE=1 SV=1	2	2	2	43.8	24.3	29.9	37.6	3.8	7.9	4.9
High	Q80X82	Symplekin OS=Mus musculus OX=10090 GN=Sympk PE=1 SV=2	1	1	1	142.5	25.2	48.9	52.6	9	8.2	9.3
High	P98083	SHC-transforming protein 1 OS=Mus musculus OX=10090 GN=Shc1 PE=1 SV=3	2	2	2	62.6	88.2	126	136.3	53.9	79.9	89.1
High	Q99LU0	Charged multivesicular body protein 1b-1 OS=Mus musculus OX=10090 GN=Chmp1b1 PE=1 SV=1	2	2	2	22.1	113.5	97.4	160.2	54.4	62.8	97.9
High	P70296	Phosphatidylethanolamine-binding protein 1 OS=Mus musculus OX=10090 GN=Pebp1 PE=1 SV=3	1	1	1	20.8	51.9	49.9	157.9	42.1	45.8	144.5
High	Q91YH5	Atlastin-3 OS=Mus musculus OX=10090 GN=Atl3 PE=1 SV=1	1	1	1	60.5	43.6	56.3	54.9	13.1	19.2	13
High	Q8BXQ2	GPI transamidase component PIG-T OS=Mus musculus OX=10090 GN=Pigt PE=1 SV=2	2	2	2	65.7
High	Q6NXW6	Cell cycle checkpoint protein RAD17 OS=Mus musculus OX=10090 GN=Rad17 PE=1 SV=2	2	2	2	77.3	58.8	84.2	110.8	7.7	9.6	7.6
High	O54786	DNA fragmentation factor subunit alpha OS=Mus musculus OX=10090 GN=Dffa PE=1 SV=2	1	1	1	36.6
High	Q9Z2L7	Cytokine receptor-like factor 3 OS=Mus musculus OX=10090 GN=Crlf3 PE=1 SV=1	1	1	1	49.5
High	P97762	Retinitis pigmentosa 9 protein homolog OS=Mus musculus OX=10090 GN=rp9 PE=1 SV=1	1	1	1	25.2
High	P27784	C-C motif chemokine 6 OS=Mus musculus OX=10090 GN=Ccl6 PE=1 SV=1	1	1	1	13	3.2	6.1	7.3	85.4	121.1	156.8
High	Q8CGC6	RNA-binding protein 28 OS=Mus musculus OX=10090 GN=Rbm28 PE=1 SV=4	2	2	2	84.2	79.3	55.2	91.7	19.6	35.2	30.2
High	Q9CR84	ATP synthase F(0) complex subunit C1, mitochondrial OS=Mus musculus OX=10090 GN=Atp5mc1 PE=1 SV=1	1	3	1	14.2	513.8	485.6	1174.1	356.5	323.4	708.7
High	Q7TSH6	SR-related and CTD-associated factor 4 OS=Mus musculus OX=10090 GN=Scaf4 PE=1 SV=1	2	2	2	129	123.6	90.5	88.5	25.4	36.9	50
High	Q8BRH4	Histone-lysine N-methyltransferase 2C OS=Mus musculus OX=10090 GN=Kmt2c PE=1 SV=2	1	1	1	539.8
High	Q8R1V4	Transmembrane emp24 domain-containing protein 4 OS=Mus musculus OX=10090 GN=Tmed4 PE=1 SV=1	2	2	1	26	23.7	24.7	70.4	41.6	12.9	49.5
High	Q8BX32	Structure-specific endonuclease subunit SLX1 OS=Mus musculus OX=10090 GN=Slx1b PE=2 SV=1	1	1	1	30.6	31.8	22.1	25.1	36.9	64.9	66.9
High	Q9Z2E2	Methyl-CpG-binding domain protein 1 OS=Mus musculus OX=10090 GN=Mbd1 PE=1 SV=2	2	2	2	70
High	Q8K2Z4	Condensin complex subunit 1 OS=Mus musculus OX=10090 GN=Ncapd2 PE=1 SV=2	2	2	2	155.6	75.2	105.6	108	8.9	16	17.3
High	P50295	Arylamine N-acetyltransferase 2 OS=Mus musculus OX=10090 GN=Nat2 PE=1 SV=1	1	2	1	33.7
High	P01680	Ig kappa chain V-IV region S107B OS=Mus musculus OX=10090 PE=4 SV=1	1	2	1	13.8	198.7	177.1	169	180	131.6	137.4
High	Q80TJ7	Histone lysine demethylase PHF8 OS=Mus musculus OX=10090 GN=Phf8 PE=1 SV=2	2	2	2	113.5	31.7	39.9	39.9	15.7	5.7	8.4
High	P56135	ATP synthase subunit f, mitochondrial OS=Mus musculus OX=10090 GN=Atp5mf PE=1 SV=3	1	1	1	10.3	19.3	21.9	49.9	22.5	13.3	35.8
High	G3X9C2	F-box only protein 50 OS=Mus musculus OX=10090 GN=Nccrp1 PE=1 SV=2	1	1	1	30.4	20.4	13.3	42.6	15.9	12.8	14.4
High	Q9CPN8	Insulin-like growth factor 2 mRNA-binding protein 3 OS=Mus musculus OX=10090 GN=Igf2bp3 PE=1 SV=1	1	2	1	63.5	25.2	13.7	18	32.3	69.7	10.8
High	Q8C754	Vacuolar protein sorting-associated protein 52 homolog OS=Mus musculus OX=10090 GN=Vps52 PE=1 SV=1	1	1	1	82
High	Q05117	Tartrate-resistant acid phosphatase type 5 OS=Mus musculus OX=10090 GN=Acp5 PE=1 SV=2	1	1	1	36.8	88.6	65.7	117	16.7	15.9	18.1
High	Q8CBY3	Leukocyte receptor cluster member 8 homolog OS=Mus musculus OX=10090 GN=Leng8 PE=1 SV=1	1	1	1	86.7
High	Q5XJY5	Coatomer subunit delta OS=Mus musculus OX=10090 GN=Arcn1 PE=1 SV=2	1	1	1	57.2
High	P17047	Lysosome-associated membrane glycoprotein 2 OS=Mus musculus OX=10090 GN=Lamp2 PE=1 SV=2	2	2	2	45.7	8.8	14.7	22.1	33.8	18.7	46.5
High	P01819	Ig heavy chain V region MOPC 141 OS=Mus musculus OX=10090 PE=4 SV=1	1	2	1	15.7
High	P29788	Vitronectin OS=Mus musculus OX=10090 GN=Vtn PE=1 SV=2	1	1	1	54.8	148	122.2	144.5	136.6	162.3	180.6
High	Q3TYS2	Cytochrome b-245 chaperone 1 OS=Mus musculus OX=10090 GN=Cybc1 PE=1 SV=2	1	2	1	20.9	29.2	19.7	28.9	14.6	14.9	11.8
High	Q921J2	GTP-binding protein Rheb OS=Mus musculus OX=10090 GN=Rheb PE=1 SV=1	1	1	1	20.4	249.6	278.7	348.3	100.8	66.3	59.9
High	Q8BIJ6	Isoleucine--tRNA ligase, mitochondrial OS=Mus musculus OX=10090 GN=Iars2 PE=1 SV=1	1	1	1	112.7
High	E9Q394	A-kinase anchor protein 13 OS=Mus musculus OX=10090 GN=Akap13 PE=1 SV=1	2	2	2	303.8	43.2	116.3	289.6	42.2	60.1	62.6
High	P62814	V-type proton ATPase subunit B, brain isoform OS=Mus musculus OX=10090 GN=Atp6v1b2 PE=1 SV=1	2	2	2	56.5	32.3	54.8	174.2	29.6	28.2	52.8
High	Q9CY73	39S ribosomal protein L44, mitochondrial OS=Mus musculus OX=10090 GN=Mrpl44 PE=1 SV=3	1	1	1	37.5	3.1	4	6.2	2.4	7.4	90
High	Q7TMD7	Desmoglein-4 OS=Mus musculus OX=10090 GN=Dsg4 PE=1 SV=1	2	3	1	114.4	39.2	2.7	4.3	3.9		718.7
High	Q9D554	Splicing factor 3A subunit 3 OS=Mus musculus OX=10090 GN=Sf3a3 PE=1 SV=2	1	1	1	58.8	172.1	133.9	229	27	25	37.8
High	Q91VV4	DENN domain-containing protein 2D OS=Mus musculus OX=10090 GN=Dennd2d PE=1 SV=1	2	2	2	53.2
High	Q8CFV9	Riboflavin kinase OS=Mus musculus OX=10090 GN=Rfk PE=1 SV=2	1	1	1	17.4	147.8	155.9	182.3	71.8	22.3	20.4
High	Q9ERI2	Ras-related protein Rab-27A OS=Mus musculus OX=10090 GN=Rab27a PE=1 SV=1	2	2	2	25	29.5	37.3	48.3	21.2	52.7	27.4
High	Q9CQA3	Succinate dehydrogenase [ubiquinone] iron-sulfur subunit, mitochondrial OS=Mus musculus OX=10090 GN=Sdhb PE=1 SV=1	3	3	3	31.8	38.5	37.6	46.8	17.9	20	24.7
High	A2BH40	AT-rich interactive domain-containing protein 1A OS=Mus musculus OX=10090 GN=Arid1a PE=1 SV=1	1	1	1	241.9
High	Q8BGT7	Survival of motor neuron-related-splicing factor 30 OS=Mus musculus OX=10090 GN=Smndc1 PE=1 SV=1	2	3	2	26.7	200.3	151.4	238		4.8	12.8
High	Q9WVJ2	26S proteasome non-ATPase regulatory subunit 13 OS=Mus musculus OX=10090 GN=Psmd13 PE=1 SV=1	2	2	2	42.8	66.9	81.2	93.7	38	12.6	84.2
High	P14152	Malate dehydrogenase, cytoplasmic OS=Mus musculus OX=10090 GN=Mdh1 PE=1 SV=3	1	1	1	36.5	161.3	106.2	312.4	157.1	100.1	349.4
High	O55028	[3-methyl-2-oxobutanoate dehydrogenase [lipoamide]] kinase, mitochondrial OS=Mus musculus OX=10090 GN=Bckdk PE=1 SV=1	1	1	1	46.6
High	Q9D2Y4	Mixed lineage kinase domain-like protein OS=Mus musculus OX=10090 GN=Mlkl PE=1 SV=1	1	1	1	54.3	15.9	43.3	37	13.6	13.6	12.7
High	O35704	Serine palmitoyltransferase 1 OS=Mus musculus OX=10090 GN=Sptlc1 PE=1 SV=2	1	1	1	52.5
High	B9EJ86	Oxysterol-binding protein-related protein 8 OS=Mus musculus OX=10090 GN=Osbpl8 PE=1 SV=1	1	1	1	101.2	29.8	31.6	44.5	48.5	44.4	49.9
High	Q9Z1K5	E3 ubiquitin-protein ligase ARIH1 OS=Mus musculus OX=10090 GN=Arih1 PE=1 SV=3	1	1	1	64	33.4	28.7	57.9	42.3	48.9	65.4
High	Q9D1B9	39S ribosomal protein L28, mitochondrial OS=Mus musculus OX=10090 GN=Mrpl28 PE=1 SV=3	1	2	1	30.2	20.6	23.1	36.6	101.4	203.1	208.2
High	Q6GV12	3-ketodihydrosphingosine reductase OS=Mus musculus OX=10090 GN=Kdsr PE=1 SV=1	1	1	1	35.9
High	Q7TQI3	Ubiquitin thioesterase OTUB1 OS=Mus musculus OX=10090 GN=Otub1 PE=1 SV=2	2	2	2	31.3	27	18.7	34.7	16.7	16.3	23.1
High	P51670	C-C motif chemokine 9 OS=Mus musculus OX=10090 GN=Ccl9 PE=1 SV=1	2	2	2	13.9
High	Q60972	Histone-binding protein RBBP4 OS=Mus musculus OX=10090 GN=Rbbp4 PE=1 SV=5	1	1	1	47.6	44.9	36.2	67.1	12.3	12.8	20.7
High	Q62426	Cystatin-B OS=Mus musculus OX=10090 GN=Cstb PE=1 SV=1	1	1	1	11	38.7	30.9	55.3	207.9	133.6	300.4
High	Q9CY27	Very-long-chain enoyl-CoA reductase OS=Mus musculus OX=10090 GN=Tecr PE=1 SV=1	2	2	2	36.1	128.7	173.6	241.1	120.5	138.3	152.2
High	Q61035	Histidine--tRNA ligase, cytoplasmic OS=Mus musculus OX=10090 GN=Hars1 PE=1 SV=2	2	2	2	57.4	28.8	21.7	104.8	30.6	24.8	32.3
High	P54822	Adenylosuccinate lyase OS=Mus musculus OX=10090 GN=Adsl PE=1 SV=2	1	1	1	54.8
High	Q91V01	Lysophospholipid acyltransferase 5 OS=Mus musculus OX=10090 GN=Lpcat3 PE=1 SV=1	1	2	1	56.1	83.1	90.3	114.1	54.2	39.7	47.6
High	Q9CR59	Growth arrest and DNA damage-inducible proteins-interacting protein 1 OS=Mus musculus OX=10090 GN=Gadd45gip1 PE=1 SV=1	1	1	1	25.8
High	Q80VY9	ATP-dependent RNA helicase DHX33 OS=Mus musculus OX=10090 GN=Dhx33 PE=1 SV=1	1	1	1	78.3	116.7	107.5	129.1	11.5	30.1	10.7
High	Q3TDN2	FAS-associated factor 2 OS=Mus musculus OX=10090 GN=Faf2 PE=1 SV=2	1	1	1	52.4	23.1	31.7	37.6	11.3	20.3	23.2
High	Q99L04	Dehydrogenase/reductase SDR family member 1 OS=Mus musculus OX=10090 GN=Dhrs1 PE=1 SV=1	1	1	1	34	12.3	15.9	22.7	20.2	14.8	22.6
High	Q64331	Unconventional myosin-VI OS=Mus musculus OX=10090 GN=Myo6 PE=1 SV=1	1	1	1	146.3		53.1	174.8	6.2	3.9	5.6
High	Q9CT10	Ran-binding protein 3 OS=Mus musculus OX=10090 GN=Ranbp3 PE=1 SV=2	1	1	1	52.5	47.2	59.4	100.1	26	24.8	32.8
High	Q3THK7	GMP synthase [glutamine-hydrolyzing] OS=Mus musculus OX=10090 GN=Gmps PE=1 SV=2	1	1	1	76.7
High	Q9CVD2	Ataxin-3 OS=Mus musculus OX=10090 GN=Atxn3 PE=1 SV=2	1	1	1	40.5
High	A2AT37	Regulator of nonsense transcripts 2 OS=Mus musculus OX=10090 GN=Upf2 PE=1 SV=1	2	2	2	147.5
High	Q9CWI3	BRCA2 and CDKN1A-interacting protein OS=Mus musculus OX=10090 GN=Bccip PE=1 SV=1	1	1	1	35.9	42.5	57.2	63.9	7.2	6.2	6.9
High	Q3U1T9	DENN domain-containing protein 1B OS=Mus musculus OX=10090 GN=Dennd1b PE=1 SV=3	1	1	1	85.5
High	Q60631	Growth factor receptor-bound protein 2 OS=Mus musculus OX=10090 GN=Grb2 PE=1 SV=1	1	1	1	25.2	103.1	134.2	230	73.3	64.1	103.8
High	O70591	Prefoldin subunit 2 OS=Mus musculus OX=10090 GN=Pfdn2 PE=1 SV=2	1	1	1	16.5	28.5	33.6	57.1	11	18.2	28.8
High	Q8BY71	Histone acetyltransferase type B catalytic subunit OS=Mus musculus OX=10090 GN=Hat1 PE=1 SV=1	1	1	1	49.2
High	Q66JY6	Rho guanine nucleotide exchange factor 39 OS=Mus musculus OX=10090 GN=Arhgef39 PE=2 SV=2	2	2	2	39.1	17.4	25.7	25.2	9.6	29.7	27.4
High	Q02780	Nuclear factor 1 A-type OS=Mus musculus OX=10090 GN=Nfia PE=1 SV=1	1	1	1	58.5	35.2	56.7	42.7	8.8	8.1	12.4
High	P42232	Signal transducer and activator of transcription 5B OS=Mus musculus OX=10090 GN=Stat5b PE=1 SV=1	2	2	2	89.9	40.3	50.1	38.6	4.4	2	4.3
High	Q8QZX5	U7 snRNA-associated Sm-like protein LSm10 OS=Mus musculus OX=10090 GN=Lsm10 PE=1 SV=1	1	1	1	13.9
High	Q61464	Zinc finger protein 638 OS=Mus musculus OX=10090 GN=Znf638 PE=1 SV=2	2	2	2	218	55.5	115.5	142.1		2.5
High	Q61805	Lipopolysaccharide-binding protein OS=Mus musculus OX=10090 GN=Lbp PE=1 SV=2	1	2	1	53
High	Q9DAR7	m7GpppX diphosphatase OS=Mus musculus OX=10090 GN=Dcps PE=1 SV=1	1	2	1	39
High	Q922V4	Pleiotropic regulator 1 OS=Mus musculus OX=10090 GN=Plrg1 PE=1 SV=1	1	1	1	56.9
High	Q8BNV1	tRNA (uracil-5-)-methyltransferase homolog A OS=Mus musculus OX=10090 GN=Trmt2a PE=1 SV=1	1	1	1	63.3
High	Q6NVE8	WD repeat-containing protein 44 OS=Mus musculus OX=10090 GN=Wdr44 PE=1 SV=1	1	1	1	101.5
High	Q8VE47	Ubiquitin-like modifier-activating enzyme 5 OS=Mus musculus OX=10090 GN=Uba5 PE=1 SV=2	1	1	1	44.8	22.2	24.6	30.1	9.9	15	11.8
High	O35593	26S proteasome non-ATPase regulatory subunit 14 OS=Mus musculus OX=10090 GN=Psmd14 PE=1 SV=2	1	1	1	34.6	70.7	87	142.9	36.1	54.3	62.2
High	Q8CI71	Syndetin OS=Mus musculus OX=10090 GN=Vps50 PE=1 SV=2	1	1	1	111.1
High	Q9CR67	Transmembrane protein 33 OS=Mus musculus OX=10090 GN=Tmem33 PE=1 SV=1	1	1	1	28
High	Q7TSZ8	Nucleus accumbens-associated protein 1 OS=Mus musculus OX=10090 GN=Nacc1 PE=1 SV=1	1	1	1	56.5	34.5	30.4	51.2	20.8	21.4	36.5
High	Q9DB15	39S ribosomal protein L12, mitochondrial OS=Mus musculus OX=10090 GN=Mrpl12 PE=1 SV=2	1	1	1	21.7	91	86.8	127.4	13.9	7.6	19.7
High	P31230	Aminoacyl tRNA synthase complex-interacting multifunctional protein 1 OS=Mus musculus OX=10090 GN=Aimp1 PE=1 SV=2	1	1	1	34	83.2	114.1	144.2	32.6	51.4	51.4
High	P20918	Plasminogen OS=Mus musculus OX=10090 GN=Plg PE=1 SV=3	1	1	1	90.7	37.4	35.1	46.5	32.2	41	80.6
High	P60904	DnaJ homolog subfamily C member 5 OS=Mus musculus OX=10090 GN=Dnajc5 PE=1 SV=1	1	1	1	22.1
High	Q9DCC8	Mitochondrial import receptor subunit TOM20 homolog OS=Mus musculus OX=10090 GN=Tomm20 PE=1 SV=1	1	1	1	16.3
High	P43247	DNA mismatch repair protein Msh2 OS=Mus musculus OX=10090 GN=Msh2 PE=1 SV=1	1	1	1	104.1
High	Q99M04	Lipoyl synthase, mitochondrial OS=Mus musculus OX=10090 GN=Lias PE=1 SV=1	1	1	1	41.9	42.3	34.1	40.5	3.6	25.7	11.3
High	Q811U4	Mitofusin-1 OS=Mus musculus OX=10090 GN=Mfn1 PE=1 SV=3	1	1	1	83.7
High	Q61878	Bone marrow proteoglycan OS=Mus musculus OX=10090 GN=Prg2 PE=1 SV=1	1	1	1	24.2		3.2	11.7	7.9	685.3	96.8
High	P11157	Ribonucleoside-diphosphate reductase subunit M2 OS=Mus musculus OX=10090 GN=Rrm2 PE=1 SV=1	2	2	2	45.1	134.4	114.7	189	20.3	39.9	30.2
High	Q6ZPJ0	Testis-expressed protein 2 OS=Mus musculus OX=10090 GN=Tex2 PE=1 SV=2	1	1	1	125.1	47.6	46.9	51.1	54.2	127.8	90.3
High	P12265	Beta-glucuronidase OS=Mus musculus OX=10090 GN=Gusb PE=1 SV=2	1	1	1	74.1
High	Q8C166	Copine-1 OS=Mus musculus OX=10090 GN=Cpne1 PE=1 SV=1	1	1	1	58.8	22.6	20.8	45.5	32.3	30.3	45.6
High	Q6PDX6	E3 ubiquitin-protein ligase Rnf220 OS=Mus musculus OX=10090 GN=Rnf220 PE=1 SV=1	1	1	1	62.7
High	Q3UZ39	Leucine-rich repeat flightless-interacting protein 1 OS=Mus musculus OX=10090 GN=Lrrfip1 PE=1 SV=2	1	1	1	79.2	9.8	63.9	188.5	11.6	21.7	25.9
High	Q8K209	Adhesion G-protein coupled receptor G1 OS=Mus musculus OX=10090 GN=Adgrg1 PE=1 SV=1	2	2	2	77.2	114.4	141.8	236.3	2.5	12.4	14.9
High	Q9DC69	NADH dehydrogenase [ubiquinone] 1 alpha subcomplex subunit 9, mitochondrial OS=Mus musculus OX=10090 GN=Ndufa9 PE=1 SV=2	1	1	1	42.5	47.9	51.5	70.5	16.6	26.4	22.5
High	Q7TSY8	Shugoshin 2 OS=Mus musculus OX=10090 GN=Sgo2 PE=1 SV=1	1	1	1	130.2	8.8	9.2	17.1	16	114.3	125.4
High	Q8BGQ7	Alanine--tRNA ligase, cytoplasmic OS=Mus musculus OX=10090 GN=Aars1 PE=1 SV=1	1	1	1	106.8
High	Q6IFX4	Keratin, type I cytoskeletal 39 OS=Mus musculus OX=10090 GN=Krt39 PE=2 SV=2	1	1	1	54.3	32.1	8.6	16.7	8.4	12.9	317.4
High	P10852	4F2 cell-surface antigen heavy chain OS=Mus musculus OX=10090 GN=Slc3a2 PE=1 SV=1	1	1	1	58.3
High	P32037	Solute carrier family 2, facilitated glucose transporter member 3 OS=Mus musculus OX=10090 GN=Slc2a3 PE=1 SV=1	1	1	1	53.4
High	Q60967	Bifunctional 3'-phosphoadenosine 5'-phosphosulfate synthase 1 OS=Mus musculus OX=10090 GN=Papss1 PE=1 SV=1	1	1	1	70.7
High	Q8R5J9	PRA1 family protein 3 OS=Mus musculus OX=10090 GN=Arl6ip5 PE=1 SV=2	1	1	1	21.5
High	P16330	2',3'-cyclic-nucleotide 3'-phosphodiesterase OS=Mus musculus OX=10090 GN=Cnp PE=1 SV=3	1	1	1	47.1
High	Q9R0Y5	Adenylate kinase isoenzyme 1 OS=Mus musculus OX=10090 GN=Ak1 PE=1 SV=1	1	1	1	21.5
High	Q99PT3	INO80 complex subunit B OS=Mus musculus OX=10090 GN=Ino80b PE=1 SV=2	1	1	1	40.5	57.1	58.6	59.2		3.4
High	Q920A7	AFG3-like protein 1 OS=Mus musculus OX=10090 GN=Afg3l1 PE=1 SV=2	1	1	1	87
High	Q7TMV3	FAST kinase domain-containing protein 5, mitochondrial OS=Mus musculus OX=10090 GN=Fastkd5 PE=2 SV=1	1	1	1	86.5
High	Q8CJF7	Protein ELYS OS=Mus musculus OX=10090 GN=Ahctf1 PE=1 SV=1	2	2	2	247.5	49.4	55.8	63.4	12.5	18.2	21.1
High	Q8BSK8	Ribosomal protein S6 kinase beta-1 OS=Mus musculus OX=10090 GN=Rps6kb1 PE=1 SV=2	1	1	1	59.1	45.2	48.9	66	4	9.1	6.3
High	Q01405	Protein transport protein Sec23A OS=Mus musculus OX=10090 GN=Sec23a PE=1 SV=2	1	1	1	86.1
High	Q4VA53	Sister chromatid cohesion protein PDS5 homolog B OS=Mus musculus OX=10090 GN=Pds5b PE=1 SV=1	1	1	1	164.3
High	Q9JKP5	Muscleblind-like protein 1 OS=Mus musculus OX=10090 GN=Mbnl1 PE=1 SV=1	2	2	2	37	99.3	76.1	137.5	41.7	43.9	40.4
High	P01791	Ig heavy chain V region HPCM6 OS=Mus musculus OX=10090 PE=1 SV=1	1	1	1	13.9	52.9	52.4	58.2	48.3	47.2	43.2
High	P56395	Cytochrome b5 OS=Mus musculus OX=10090 GN=Cyb5a PE=1 SV=2	1	2	1	15.2	58.5	66.6	181.4	47	15.8	62.2
High	Q8BFV2	PCI domain-containing protein 2 OS=Mus musculus OX=10090 GN=Pcid2 PE=1 SV=1	1	2	1	46.1	71.1	82.9	95.6	12.6	25	15.7
High	Q61247	Alpha-2-antiplasmin OS=Mus musculus OX=10090 GN=Serpinf2 PE=1 SV=1	1	1	1	54.9	62.8	59.6	73.3	77.7	71.9	64
High	Q80V03	Uncharacterized aarF domain-containing protein kinase 5 OS=Mus musculus OX=10090 GN=Adck5 PE=2 SV=2	1	1	1	66.6
High	Q9JJU8	SH3 domain-binding glutamic acid-rich-like protein OS=Mus musculus OX=10090 GN=Sh3bgrl PE=1 SV=1	1	1	1	12.8	11.1	21.1	50.5	14	21	30.8
High	Q6TCG2	Membrane progesterone receptor epsilon OS=Mus musculus OX=10090 GN=Paqr9 PE=1 SV=2	1	1	1	42.7	56.3	82.9	84	2	2.2
High	Q6PAQ4	RNA exonuclease 4 OS=Mus musculus OX=10090 GN=Rexo4 PE=2 SV=2	1	1	1	47.6
High	P61965	WD repeat-containing protein 5 OS=Mus musculus OX=10090 GN=Wdr5 PE=1 SV=1	1	1	1	36.6	37.8	35.4	45.3	12.9	26	24.1
High	Q61093	Cytochrome b-245 heavy chain OS=Mus musculus OX=10090 GN=Cybb PE=1 SV=1	1	1	1	65.3
High	Q6P9P6	Kinesin-like protein KIF11 OS=Mus musculus OX=10090 GN=Kif11 PE=1 SV=1	1	1	1	118
High	P62274	40S ribosomal protein S29 OS=Mus musculus OX=10090 GN=Rps29 PE=1 SV=2	2	3	2	6.7	569.2	623.9	1013.3	96.1	56.1	39.8
High	Q91WE2	PSME3-interacting protein OS=Mus musculus OX=10090 GN=Psme3ip1 PE=1 SV=1	1	1	1	28.7
High	Q3UMB9	WASH complex subunit 4 OS=Mus musculus OX=10090 GN=Washc4 PE=1 SV=2	1	1	1	136.3
High	P70202	Latexin OS=Mus musculus OX=10090 GN=Lxn PE=1 SV=2	1	1	1	25.5	10	7.5	16.2	70.8	24.3	127.8
High	P56960	Exosome component 10 OS=Mus musculus OX=10090 GN=Exosc10 PE=1 SV=2	1	1	1	100.9	113.3	97.6	136.1	2.8
High	Q8BTH8	Casein kinase I isoform gamma-1 OS=Mus musculus OX=10090 GN=Csnk1g1 PE=1 SV=2	1	1	1	52.7	44	94.2	117	19.1	13.2	45.5
High	P97449	Aminopeptidase N OS=Mus musculus OX=10090 GN=Anpep PE=1 SV=4	2	2	2	109.6
High	Q9CS74	Protein ecdysoneless homolog OS=Mus musculus OX=10090 GN=Ecd PE=1 SV=2	2	2	2	71.7
High	Q7TT28	RNA exonuclease 1 homolog OS=Mus musculus OX=10090 GN=Rexo1 PE=1 SV=1	1	1	1	130.7	61.7	71.5	82	2	5.4
High	O08583	THO complex subunit 4 OS=Mus musculus OX=10090 GN=Alyref PE=1 SV=3	2	3	2	26.9	68.4	46.5	92.6	9.3	14.3	13.1
High	Q9CR47	Ribosome biogenesis protein NSA2 homolog OS=Mus musculus OX=10090 GN=Nsa2 PE=2 SV=1	2	2	2	30	181	215.1	425.6	7.4	6.9	11.5
High	P97384	Annexin A11 OS=Mus musculus OX=10090 GN=Anxa11 PE=1 SV=2	1	1	1	54
High	Q6A0A9	Constitutive coactivator of PPAR-gamma-like protein 1 OS=Mus musculus OX=10090 GN=FAM120A PE=1 SV=2	1	2	1	121.6	60.3	82.5	94.7	62.1	109.9	77.5
High	Q8CD92	Tetratricopeptide repeat protein 27 OS=Mus musculus OX=10090 GN=Ttc27 PE=1 SV=2	1	1	1	96.4
High	Q924L1	LETM1 domain-containing protein 1 OS=Mus musculus OX=10090 GN=Letmd1 PE=1 SV=1	1	1	1	41.7	38.4	39.6	157.3	11.9	19.5	61.4
High	Q99LB0	Deoxynucleotidyltransferase terminal-interacting protein 1 OS=Mus musculus OX=10090 GN=Dnttip1 PE=1 SV=1	1	1	1	36.8
High	Q8BGB2	Tetratricopeptide repeat protein 7A OS=Mus musculus OX=10090 GN=Ttc7a PE=1 SV=1	1	1	1	96.1
High	Q9R1K9	Centrin-2 OS=Mus musculus OX=10090 GN=Cetn2 PE=1 SV=1	1	1	1	19.8
High	Q60692	Proteasome subunit beta type-6 OS=Mus musculus OX=10090 GN=Psmb6 PE=1 SV=3	1	2	1	25.4	88.3	53.6	198	84	64.1	102.9
High	P35174	Stefin-2 OS=Mus musculus OX=10090 GN=Stfa2 PE=3 SV=2	1	1	1	11.8
High	Q14B98	Sesquipedalian-2 OS=Mus musculus OX=10090 GN=Pheta2 PE=1 SV=1	1	1	1	28.7
High	Q9D2R8	28S ribosomal protein S33, mitochondrial OS=Mus musculus OX=10090 GN=Mrps33 PE=1 SV=1	1	1	1	12.5	32.2	37.6	75.7	3.1	5.9	3.4
High	Q69ZW3	EH domain-binding protein 1 OS=Mus musculus OX=10090 GN=Ehbp1 PE=1 SV=3	1	1	1	139	8.6	14.1	11.8	61.6	58.1	136.5
High	P36536	GTP-binding protein SAR1a OS=Mus musculus OX=10090 GN=Sar1a PE=1 SV=1	1	1	1	22.4	34.3	34.1	56.8	31.8	22.8	34.5
High	P01898	H-2 class I histocompatibility antigen, Q10 alpha chain OS=Mus musculus OX=10090 GN=H2-Q10 PE=1 SV=3	1	1	1	37.2	83.9	113.6	120.6	74.8	93	176.6
High	O88967	ATP-dependent zinc metalloprotease YME1L1 OS=Mus musculus OX=10090 GN=Yme1l1 PE=1 SV=1	1	1	1	80	102.4	125.1	177.8	14.2	12.1	14.3
High	Q9CQW2	ADP-ribosylation factor-like protein 8B OS=Mus musculus OX=10090 GN=Arl8b PE=1 SV=1	1	1	1	21.5	92.8	136.9	178.6	90.1	90.1	105.6
High	P55264	Adenosine kinase OS=Mus musculus OX=10090 GN=Adk PE=1 SV=2	1	1	1	40.1
High	E9PZJ8	Activating signal cointegrator 1 complex subunit 3 OS=Mus musculus OX=10090 GN=Ascc3 PE=1 SV=1	1	1	1	250.4
High	P17897	Lysozyme C-1 OS=Mus musculus OX=10090 GN=Lyz1 PE=1 SV=1	2	2	2	16.8	39.7	284.7	72.5	54.7	66.5	77.5
High	Q8R149	BUD13 homolog OS=Mus musculus OX=10090 GN=Bud13 PE=1 SV=1	1	1	1	72.1	132.9	134.4	172.2	2.6
High	Q91WD5	NADH dehydrogenase [ubiquinone] iron-sulfur protein 2, mitochondrial OS=Mus musculus OX=10090 GN=Ndufs2 PE=1 SV=1	1	1	1	52.6
High	P48453	Serine/threonine-protein phosphatase 2B catalytic subunit beta isoform OS=Mus musculus OX=10090 GN=Ppp3cb PE=1 SV=2	1	1	1	59.1
High	Q8CFJ9	GATOR complex protein WDR24 OS=Mus musculus OX=10090 GN=Wdr24 PE=1 SV=1	1	1	1	88.1
High	O35640	Annexin A8 OS=Mus musculus OX=10090 GN=Anxa8 PE=1 SV=2	1	1	1	36.7
High	Q61142	Spindlin-1 OS=Mus musculus OX=10090 GN=Spin1 PE=1 SV=2	1	1	1	29.6
High	Q80X41	Serine/threonine-protein kinase VRK1 OS=Mus musculus OX=10090 GN=Vrk1 PE=1 SV=2	1	1	1	49.7	36.3	27.5	32.3	3.7	8.9	10.5
High	Q05CL8	La-related protein 7 OS=Mus musculus OX=10090 GN=Larp7 PE=1 SV=2	1	1	1	64.8	49.9	59.2	80.5	128.7	286.5	161.3
High	Q60715	Prolyl 4-hydroxylase subunit alpha-1 OS=Mus musculus OX=10090 GN=P4ha1 PE=1 SV=2	1	1	1	60.9
High	Q9D103	Interferon-induced transmembrane protein 1 OS=Mus musculus OX=10090 GN=Ifitm1 PE=2 SV=1	1	1	1	11.5	44.4	42.6	56	212.3	61.7	153.8
High	Q99L48	60S ribosomal export protein NMD3 OS=Mus musculus OX=10090 GN=Nmd3 PE=1 SV=1	1	1	1	57.6
High	Q99KP3	Lambda-crystallin homolog OS=Mus musculus OX=10090 GN=Cryl1 PE=1 SV=3	1	1	1	35.2	14.6	20.3	22.3	18.8	16.5	17.4
High	Q8QZT1	Acetyl-CoA acetyltransferase, mitochondrial OS=Mus musculus OX=10090 GN=Acat1 PE=1 SV=1	1	1	1	44.8	89.2	84	129.4	78	21.2	58.5
High	Q8CHH9	Septin-8 OS=Mus musculus OX=10090 GN=Septin8 PE=1 SV=4	1	1	1	49.8	43.3	40.2	83.3	33.6	25.9	59
High	P18654	Ribosomal protein S6 kinase alpha-3 OS=Mus musculus OX=10090 GN=Rps6ka3 PE=1 SV=2	1	1	1	83.6
High	P81122	Insulin receptor substrate 2 OS=Mus musculus OX=10090 GN=Irs2 PE=1 SV=2	1	1	1	136.7	32.5	38.1	70.6	6.6	4.2	5.9
High	Q80ZK0	28S ribosomal protein S10, mitochondrial OS=Mus musculus OX=10090 GN=Mrps10 PE=1 SV=1	1	1	1	18.7	18.3	13	26.8	9.5	14.4	25.7
High	P84086	Complexin-2 OS=Mus musculus OX=10090 GN=Cplx2 PE=1 SV=1	1	1	1	15.4
High	Q9CZW4	Fatty acid CoA ligase Acsl3 OS=Mus musculus OX=10090 GN=Acsl3 PE=1 SV=2	1	1	1	80.4
High	Q62448	Eukaryotic translation initiation factor 4 gamma 2 OS=Mus musculus OX=10090 GN=Eif4g2 PE=1 SV=2	1	1	1	102
High	Q9WUP7	Ubiquitin carboxyl-terminal hydrolase isozyme L5 OS=Mus musculus OX=10090 GN=Uchl5 PE=1 SV=2	1	1	1	37.6
High	Q91V12	Cytosolic acyl coenzyme A thioester hydrolase OS=Mus musculus OX=10090 GN=Acot7 PE=1 SV=2	1	1	1	42.5	29.8	27.7	48.8	90.6	43.8	76.9
High	P97823	Acyl-protein thioesterase 1 OS=Mus musculus OX=10090 GN=Lypla1 PE=1 SV=1	1	1	1	24.7	29.4	31.1	53	68.3	34.6	48.9
High	Q99JR6	Nicotinamide/nicotinic acid mononucleotide adenylyltransferase 3 OS=Mus musculus OX=10090 GN=Nmnat3 PE=1 SV=1	1	1	1	27.7	76.2	93.7	112.5	10.2	11.5	7.5
High	O70422	General transcription factor IIH subunit 4 OS=Mus musculus OX=10090 GN=Gtf2h4 PE=1 SV=1	1	2	1	52.2	108.4	107.6	133.1	9.6	14.6	8.2
High	Q4FK66	Pre-mRNA-splicing factor 38A OS=Mus musculus OX=10090 GN=Prpf38a PE=1 SV=1	1	1	1	37.4
High	Q6P9R2	Serine/threonine-protein kinase OSR1 OS=Mus musculus OX=10090 GN=Oxsr1 PE=1 SV=1	1	1	1	58.2	22.4	31.3	43.3	11.2	3.6	23.3
High	Q91VR8	Protein BRICK1 OS=Mus musculus OX=10090 GN=Brk1 PE=1 SV=1	1	2	1	8.8	19.9	29.3	40	13.6	18.5	20.1
High	Q14C51	Pentatricopeptide repeat domain-containing protein 3, mitochondrial OS=Mus musculus OX=10090 GN=Ptcd3 PE=1 SV=2	1	1	1	77.7
High	Q62432	Mothers against decapentaplegic homolog 2 OS=Mus musculus OX=10090 GN=Smad2 PE=1 SV=2	1	2	1	52.2
High	O54972	Protein CBFA2T3 OS=Mus musculus OX=10090 GN=Cbfa2t3 PE=1 SV=2	1	1	1	68	48.1	29.9	28.8	1.9	5.3	2.8
High	Q8R2U6	Diphosphoinositol polyphosphate phosphohydrolase 2 OS=Mus musculus OX=10090 GN=Nudt4 PE=1 SV=1	1	1	1	20.1
High	Q9CPR5	39S ribosomal protein L15, mitochondrial OS=Mus musculus OX=10090 GN=Mrpl15 PE=1 SV=1	1	1	1	33.5
High	Q00547	Hyaluronan mediated motility receptor OS=Mus musculus OX=10090 GN=Hmmr PE=1 SV=4	1	1	1	91.7	33.7	21.9	38.3	23.2	48.8	13.1
High	P35821	Tyrosine-protein phosphatase non-receptor type 1 OS=Mus musculus OX=10090 GN=Ptpn1 PE=1 SV=2	1	1	1	49.6	16.3	25.7	27.5	10.6	16.3	14.2
High	Q9EQ06	Estradiol 17-beta-dehydrogenase 11 OS=Mus musculus OX=10090 GN=Hsd17b11 PE=1 SV=1	1	1	1	32.9
High	Q8BML9	Glutamine--tRNA ligase OS=Mus musculus OX=10090 GN=Qars1 PE=1 SV=1	1	1	1	87.6	22.6	20.8	46.1	12.8	13.7	27.4
High	P50544	Very long-chain specific acyl-CoA dehydrogenase, mitochondrial OS=Mus musculus OX=10090 GN=Acadvl PE=1 SV=3	1	1	1	70.8
High	Q9QY76	Vesicle-associated membrane protein-associated protein B OS=Mus musculus OX=10090 GN=Vapb PE=1 SV=3	1	1	1	26.9	16.3	22.8	31.5	9.1	6.4	16.9
High	Q91V92	ATP-citrate synthase OS=Mus musculus OX=10090 GN=Acly PE=1 SV=1	2	2	2	119.7	23.6	32.1	66.7	57	63.1	73.6
High	E9Q2M9	WD repeat- and FYVE domain-containing protein 4 OS=Mus musculus OX=10090 GN=Wdfy4 PE=1 SV=2	1	1	1	354.1
High	Q9DBZ5	Eukaryotic translation initiation factor 3 subunit K OS=Mus musculus OX=10090 GN=Eif3k PE=1 SV=1	1	1	1	25.1
High	Q9D0M1	Phosphoribosyl pyrophosphate synthase-associated protein 1 OS=Mus musculus OX=10090 GN=Prpsap1 PE=1 SV=1	1	1	1	39.4
High	Q9WUU9	Germinal-center associated nuclear protein OS=Mus musculus OX=10090 GN=Mcm3ap PE=1 SV=2	2	2	2	217.2
High	Q9CQR4	Acyl-coenzyme A thioesterase 13 OS=Mus musculus OX=10090 GN=Acot13 PE=1 SV=1	1	1	1	15.2
High	Q9DBT5	AMP deaminase 2 OS=Mus musculus OX=10090 GN=Ampd2 PE=1 SV=1	1	1	1	92
High	Q66JY2	INO80 complex subunit D OS=Mus musculus OX=10090 GN=Ino80d PE=2 SV=4	1	1	1	112.3
High	P22907	Porphobilinogen deaminase OS=Mus musculus OX=10090 GN=Hmbs PE=1 SV=2	1	1	1	39.3	22.5	26.8	53.5	3.9	6.2	7.3
High	Q8K327	Chromosome alignment-maintaining phosphoprotein 1 OS=Mus musculus OX=10090 GN=Champ1 PE=1 SV=1	1	1	1	87.5
High	P34884	Macrophage migration inhibitory factor OS=Mus musculus OX=10090 GN=Mif PE=1 SV=2	2	2	2	12.5	51.7	39.9	77.7	51.6	61.5	96.8
High	Q8C7X2	ER membrane protein complex subunit 1 OS=Mus musculus OX=10090 GN=Emc1 PE=1 SV=1	1	1	1	111.5	169.2	171.2	266	97.1	86.5	85.1
High	Q9D903	Probable rRNA-processing protein EBP2 OS=Mus musculus OX=10090 GN=Ebna1bp2 PE=2 SV=1	1	1	1	34.7	248.9	146.6	442	2.3	3.2	4
High	O70237	Zinc finger protein Gfi-1b OS=Mus musculus OX=10090 GN=Gfi1b PE=1 SV=1	1	1	1	37.4	53.5	70.4	78.5	2.7		2.9
High	Q3UIZ8	Myosin light chain kinase 3 OS=Mus musculus OX=10090 GN=Mylk3 PE=1 SV=1	1	1	1	86.3	17.5	15.8	28.6	13.7	17.2	23.3
High	E9Q414	Apolipoprotein B-100 OS=Mus musculus OX=10090 GN=Apob PE=1 SV=1	1	1	1	509.1
High	Q9QZQ8	Core histone macro-H2A.1 OS=Mus musculus OX=10090 GN=Macroh2a1 PE=1 SV=3	1	1	1	39.7
High	Q80X72	Leucine-rich repeat-containing protein 15 OS=Mus musculus OX=10090 GN=Lrrc15 PE=2 SV=1	1	1	1	64.1	55.2	5.1	9.5	7.2	11	327.7
High	Q99NH0	Ankyrin repeat domain-containing protein 17 OS=Mus musculus OX=10090 GN=Ankrd17 PE=1 SV=2	1	1	1	274	11.5	10.7	21.3	89.9	49.3	339.1
High	Q60865	Caprin-1 OS=Mus musculus OX=10090 GN=Caprin1 PE=1 SV=2	1	1	1	78.1	22.4	33.3	76.2	10.3	21.6	30.3
High	Q99KU0	Vacuole membrane protein 1 OS=Mus musculus OX=10090 GN=Vmp1 PE=1 SV=2	1	1	1	45.9
High	Q810V0	U3 small nucleolar ribonucleoprotein protein MPP10 OS=Mus musculus OX=10090 GN=Mphosph10 PE=1 SV=2	1	1	1	78.7	57.5	63	62.5
High	Q8BWR2	PITH domain-containing protein 1 OS=Mus musculus OX=10090 GN=Pithd1 PE=1 SV=1	1	1	1	24.2	28.6	14.1	40.3	26.3	20.8	39.5
High	P99029	Peroxiredoxin-5, mitochondrial OS=Mus musculus OX=10090 GN=Prdx5 PE=1 SV=2	1	1	1	21.9
High	Q9DB25	Dolichyl-phosphate beta-glucosyltransferase OS=Mus musculus OX=10090 GN=Alg5 PE=1 SV=1	1	1	1	36.8	58.5	62.5	72.3	21.6	16.2	9.5
High	Q91VD9	NADH-ubiquinone oxidoreductase 75 kDa subunit, mitochondrial OS=Mus musculus OX=10090 GN=Ndufs1 PE=1 SV=2	1	1	1	79.7	70.3	79.7	101.2	18.5	30.6	23.4
High	P11032	Granzyme A OS=Mus musculus OX=10090 GN=Gzma PE=1 SV=2	2	2	2	28.6	20	39	50.4	317.2	2.9	27.4
High	Q6ZQK0	Condensin-2 complex subunit D3 OS=Mus musculus OX=10090 GN=Ncapd3 PE=1 SV=3	2	2	2	169.3
High	P62482	Voltage-gated potassium channel subunit beta-2 OS=Mus musculus OX=10090 GN=Kcnab2 PE=1 SV=1	1	1	1	41	30.6	37.2	66.4	40	30.8	70.2
High	Q9D0T1	NHP2-like protein 1 OS=Mus musculus OX=10090 GN=Snu13 PE=1 SV=4	1	1	1	14.2
High	O89098	Cystatin-F OS=Mus musculus OX=10090 GN=Cst7 PE=2 SV=1	1	1	1	16.4	17.1	16.1	22.9	73.9	28.7	77.7
High	Q8CE96	tRNA (adenine(58)-N(1))-methyltransferase non-catalytic subunit TRM6 OS=Mus musculus OX=10090 GN=Trmt6 PE=1 SV=1	1	1	1	55.5
High	P62876	DNA-directed RNA polymerases I, II, and III subunit RPABC5 OS=Mus musculus OX=10090 GN=Polr2l PE=3 SV=1	1	1	1	7.6	90.9	108.3	118.2	36.7	64.9	51.5
High	A2A8U2	Transmembrane protein 201 OS=Mus musculus OX=10090 GN=Tmem201 PE=1 SV=1	1	1	1	72.5
High	Q8BG81	Polymerase delta-interacting protein 3 OS=Mus musculus OX=10090 GN=Poldip3 PE=1 SV=1	1	1	1	46.1	71	62.7	104.4	2.4
High	Q99LC8	Translation initiation factor eIF-2B subunit alpha OS=Mus musculus OX=10090 GN=Eif2b1 PE=1 SV=1	1	1	1	33.8	116.3	145.4	221.3	47.1	72.2	66.6
High	Q8K1A0	rRNA N6-adenosine-methyltransferase METTL5 OS=Mus musculus OX=10090 GN=Mettl5 PE=1 SV=2	1	1	1	23.6
High	Q3UIR3	E3 ubiquitin-protein ligase DTX3L OS=Mus musculus OX=10090 GN=Dtx3l PE=1 SV=1	1	1	1	83
High	Q9QWK4	CD5 antigen-like OS=Mus musculus OX=10090 GN=Cd5l PE=1 SV=3	1	1	1	38.8
High	Q3TJ91	LLGL scribble cell polarity complex component 2 OS=Mus musculus OX=10090 GN=Llgl2 PE=1 SV=2	1	1	1	114.3
High	P35601	Replication factor C subunit 1 OS=Mus musculus OX=10090 GN=Rfc1 PE=1 SV=2	1	1	1	125.9
High	P04186	Complement factor B OS=Mus musculus OX=10090 GN=Cfb PE=1 SV=2	1	1	1	85
High	Q9DB00	GON-4-like protein OS=Mus musculus OX=10090 GN=Gon4l PE=1 SV=3	1	1	1	248.6	95	88	88.5	3.3	24.1	3.7
High	P42227	Signal transducer and activator of transcription 3 OS=Mus musculus OX=10090 GN=Stat3 PE=1 SV=2	1	1	1	88	17.9	23.8	37.3	35.8	28	44.3
High	Q9WUM3	Coronin-1B OS=Mus musculus OX=10090 GN=Coro1b PE=1 SV=1	1	1	1	53.9	65.1	61.2	126.1	57.5	36.7	81.1
High	Q9DB05	Alpha-soluble NSF attachment protein OS=Mus musculus OX=10090 GN=Napa PE=1 SV=1	1	1	1	33.2	13.3	11.4	38.7	14	6.4	30.9
High	Q9D187	Cytosolic iron-sulfur assembly component 2B OS=Mus musculus OX=10090 GN=Ciao2b PE=1 SV=1	1	1	1	17.7
High	P33609	DNA polymerase alpha catalytic subunit OS=Mus musculus OX=10090 GN=Pola1 PE=1 SV=2	1	1	1	167.2
High	Q80XN0	D-beta-hydroxybutyrate dehydrogenase, mitochondrial OS=Mus musculus OX=10090 GN=Bdh1 PE=1 SV=2	1	1	1	38.3
High	Q8K2Z2	Pre-mRNA-processing factor 39 OS=Mus musculus OX=10090 GN=Prpf39 PE=1 SV=3	1	1	1	77.9
High	Q5XG71	Small subunit processome component 20 homolog OS=Mus musculus OX=10090 GN=Utp20 PE=1 SV=2	1	1	1	317.5	35	25.6	44.1	4.9	5.6	6
High	Q3UC65	Arginine/serine-rich protein 1 OS=Mus musculus OX=10090 GN=Rsrp1 PE=1 SV=1	1	1	1	34.5
High	Q62465	Synaptic vesicle membrane protein VAT-1 homolog OS=Mus musculus OX=10090 GN=Vat1 PE=1 SV=3	1	1	1	43.1
High	Q810B6	Rabankyrin-5 OS=Mus musculus OX=10090 GN=Ankfy1 PE=1 SV=2	1	1	1	128.6
High	Q9CWK8	Sorting nexin-2 OS=Mus musculus OX=10090 GN=Snx2 PE=1 SV=2	1	1	1	58.4	25.5	35.1	63.5	14.3	38	35.7
High	Q3TCN2	Putative phospholipase B-like 2 OS=Mus musculus OX=10090 GN=Plbd2 PE=1 SV=2	1	1	1	66.2	45.2	88.9	123.5	7.5	6.7	11.2
High	Q9D787	RING-type E3 ubiquitin-protein ligase PPIL2 OS=Mus musculus OX=10090 GN=Ppil2 PE=1 SV=2	1	1	1	59
High	Q9JLB0	Protein PALS2 OS=Mus musculus OX=10090 GN=Pals2 PE=1 SV=1	1	1	1	62.6
High	P14576	Signal recognition particle 54 kDa protein OS=Mus musculus OX=10090 GN=Srp54 PE=1 SV=2	1	1	1	55.7	14.2	20.4	34.8	13.3	4.5	20.1
High	P48036	Annexin A5 OS=Mus musculus OX=10090 GN=Anxa5 PE=1 SV=1	1	1	1	35.7	54.4	42.7	78.4	83.1	37.9	92.3
High	Q6V595	Kelch-like protein 6 OS=Mus musculus OX=10090 GN=Klhl6 PE=2 SV=2	1	1	1	70.1	14	44.4	85	2.7	7.6	5.1
High	Q9ESW4	Acylglycerol kinase, mitochondrial OS=Mus musculus OX=10090 GN=Agk PE=1 SV=1	1	1	1	46.9	19.7	38	62.5	16.7	7	16.3
High	O08917	Flotillin-1 OS=Mus musculus OX=10090 GN=Flot1 PE=1 SV=1	1	1	1	47.5
High	Q8BLY2	Threonine--tRNA ligase 2, cytoplasmic OS=Mus musculus OX=10090 GN=Tars3 PE=1 SV=1	2	2	1	91.3
High	Q9ERI5	Bifunctional arginine demethylase and lysyl-hydroxylase JMJD6 OS=Mus musculus OX=10090 GN=Jmjd6 PE=1 SV=2	1	1	1	46.5	10.8	13.1	14	24.6	32.1	42.2
High	Q9CXW2	28S ribosomal protein S22, mitochondrial OS=Mus musculus OX=10090 GN=Mrps22 PE=1 SV=1	1	1	1	41.2	74.4	77.7	112.8	21.7	27.7	44.7
High	Q9WVL0	Maleylacetoacetate isomerase OS=Mus musculus OX=10090 GN=Gstz1 PE=1 SV=1	1	1	1	24.3	47.6	47.3	69.2	15.6	29.5	17.1
High	O55135	Eukaryotic translation initiation factor 6 OS=Mus musculus OX=10090 GN=Eif6 PE=1 SV=2	1	1	1	26.5	19.2	20.8	39.8	23.5	22.2	29.2
High	Q9R1Q7	Proteolipid protein 2 OS=Mus musculus OX=10090 GN=Plp2 PE=1 SV=1	1	2	1	16.6
High	O54885	TYRO protein tyrosine kinase-binding protein OS=Mus musculus OX=10090 GN=Tyrobp PE=1 SV=1	1	1	1	12.4	23.6	22.8	38.9	86.8	37.8	64.2
High	Q9Z148	Histone-lysine N-methyltransferase EHMT2 OS=Mus musculus OX=10090 GN=Ehmt2 PE=1 SV=2	1	1	1	138
High	O89079	Coatomer subunit epsilon OS=Mus musculus OX=10090 GN=Cope PE=1 SV=3	1	1	1	34.5	30.6	30.7	46.1	34.8	8.7	13
High	Q9DCD2	Pre-mRNA-splicing factor SYF1 OS=Mus musculus OX=10090 GN=Xab2 PE=1 SV=1	2	2	2	99.9
High	Q61335	B-cell receptor-associated protein 31 OS=Mus musculus OX=10090 GN=Bcap31 PE=1 SV=4	1	1	1	27.9	50.7	23.3	104	57.1	30	86.3
High	P50543	Protein S100-A11 OS=Mus musculus OX=10090 GN=S100a11 PE=1 SV=1	1	1	1	11.1	4.6	4.6	6.7	49.8	65.6	116
High	Q91VH2	Sorting nexin-9 OS=Mus musculus OX=10090 GN=Snx9 PE=1 SV=1	1	1	1	66.5	63.5	120.1	96	4.9	62.1	10.8
High	P13412	Troponin I, fast skeletal muscle OS=Mus musculus OX=10090 GN=Tnni2 PE=2 SV=2	1	1	1	21.3
High	Q9WVG9	Male-specific lethal 3 homolog OS=Mus musculus OX=10090 GN=Msl3 PE=1 SV=3	1	1	1	60.3
High	Q9CWR2	Histone-lysine N-methyltransferase SMYD3 OS=Mus musculus OX=10090 GN=Smyd3 PE=2 SV=1	1	1	1	49.1
High	Q60787	Lymphocyte cytosolic protein 2 OS=Mus musculus OX=10090 GN=Lcp2 PE=1 SV=2	1	1	1	60.2	54.9	88.4	95.3	58.9	41.3	34.3
High	Q8BG67	Protein EFR3 homolog A OS=Mus musculus OX=10090 GN=Efr3a PE=1 SV=1	1	1	1	92.6	15.4	22.6	54.6	9	10	8.3
High	Q8VCI0	Phospholipase B-like 1 OS=Mus musculus OX=10090 GN=Plbd1 PE=1 SV=1	1	1	1	63	179	184.8	293.6	3.9	8.3	3.6
High	Q8K386	Ras-related protein Rab-15 OS=Mus musculus OX=10090 GN=Rab15 PE=1 SV=1	1	1	1	24.3	110.9	136.8	166.2	87.7	101.3	86.2
High	Q8BJW7	Crossover junction endonuclease EME1 OS=Mus musculus OX=10090 GN=Eme1 PE=1 SV=1	1	1	1	63.4	34	33.9	31.2	6.9	12	7.3
High	Q6ZPV2	Chromatin-remodeling ATPase INO80 OS=Mus musculus OX=10090 GN=Ino80 PE=1 SV=2	1	1	1	176.4
High	Q9DBU6	Serine/Arginine-related protein 53 OS=Mus musculus OX=10090 GN=Rsrc1 PE=1 SV=1	1	1	1	38.6	14.1	23.8	27.8	14.5	28.3	3.4
High	P63073	Eukaryotic translation initiation factor 4E OS=Mus musculus OX=10090 GN=Eif4e PE=1 SV=1	1	1	1	25
High	Q9R0X0	Mediator of RNA polymerase II transcription subunit 20 OS=Mus musculus OX=10090 GN=Med20 PE=1 SV=1	1	1	1	23.2	41.9	34.7	47	5.7	3.9	4
High	P97386	DNA ligase 3 OS=Mus musculus OX=10090 GN=Lig3 PE=1 SV=2	1	1	1	113
High	Q3TFK5	G patch domain-containing protein 4 OS=Mus musculus OX=10090 GN=Gpatch4 PE=1 SV=1	1	1	1	46.5
High	Q91XV3	Brain acid soluble protein 1 OS=Mus musculus OX=10090 GN=Basp1 PE=1 SV=3	1	1	1	22.1
High	P63254	Cysteine-rich protein 1 OS=Mus musculus OX=10090 GN=Crip1 PE=1 SV=2	1	1	1	8.5	144.7	145.9	161.7	32.3	4.8	21.9
High	A2AGH6	Mediator of RNA polymerase II transcription subunit 12 OS=Mus musculus OX=10090 GN=Med12 PE=1 SV=1	1	1	1	244.4
High	P09528	Ferritin heavy chain OS=Mus musculus OX=10090 GN=Fth1 PE=1 SV=2	1	1	1	21.1
High	Q8K3P0	Short-chain dehydrogenase/reductase family 9C member 7 OS=Mus musculus OX=10090 GN=Sdr9c7 PE=2 SV=1	1	1	1	35.1
High	P26339	Chromogranin-A OS=Mus musculus OX=10090 GN=Chga PE=1 SV=1	1	1	1	51.8	52.1	43.9	46	48.3	45.7	38.6
High	Q9CZU3	Exosome RNA helicase MTR4 OS=Mus musculus OX=10090 GN=Mtrex PE=1 SV=1	1	1	1	117.6	36.8	37	61.6	20.4	20.7	24
High	Q5U5Q9	BRCA1-A complex subunit RAP80 OS=Mus musculus OX=10090 GN=Uimc1 PE=1 SV=2	1	1	1	81.4
High	Q91VW3	SH3 domain-binding glutamic acid-rich-like protein 3 OS=Mus musculus OX=10090 GN=Sh3bgrl3 PE=1 SV=1	1	1	1	10.5	11.7	18.1	50.8	53.5	14.5	84.2
High	Q9JJD0	THAP domain-containing protein 11 OS=Mus musculus OX=10090 GN=Thap11 PE=1 SV=1	1	1	1	33.3	30	32.5	49.3
High	P53995	Anaphase-promoting complex subunit 1 OS=Mus musculus OX=10090 GN=Anapc1 PE=1 SV=2	1	1	1	215.9
High	P52332	Tyrosine-protein kinase JAK1 OS=Mus musculus OX=10090 GN=Jak1 PE=1 SV=1	1	1	1	133.3	32.8	42.9	54.8	22.1	14.7	8.7
High	Q924Z6	Exportin-6 OS=Mus musculus OX=10090 GN=Xpo6 PE=1 SV=2	1	1	1	128.6
High	G3X9G7	Zinc finger protein 809 OS=Mus musculus OX=10090 GN=Zfp809 PE=2 SV=1	1	1	1	46.9	48.2	57.2	70.3	2	8.5	7.1
High	P97369	Neutrophil cytosol factor 4 OS=Mus musculus OX=10090 GN=Ncf4 PE=1 SV=2	1	1	1	38.7	7.5	19.9	37.5	31.8	43.9	43.9
High	Q8R1F0	Leydig cell tumor 10 kDa protein homolog OS=Mus musculus OX=10090 GN=D8Ertd738e PE=3 SV=1	2	2	2	10.2	221.2	226.7	403.6	5.6	6.7	7.2
High	Q99KK7	Dipeptidyl peptidase 3 OS=Mus musculus OX=10090 GN=Dpp3 PE=1 SV=2	1	2	1	82.8
High	Q3UYV9	Nuclear cap-binding protein subunit 1 OS=Mus musculus OX=10090 GN=Ncbp1 PE=1 SV=2	1	1	1	91.9
High	Q08297	DNA repair protein RAD51 homolog 1 OS=Mus musculus OX=10090 GN=Rad51 PE=1 SV=1	1	1	1	36.9
High	Q9Z1D1	Eukaryotic translation initiation factor 3 subunit G OS=Mus musculus OX=10090 GN=Eif3g PE=1 SV=2	1	1	1	35.6	41.2	43.6	95.3	14.3	26.2	47
High	Q8CEF1	Protein fem-1 homolog C OS=Mus musculus OX=10090 GN=Fem1c PE=2 SV=1	1	1	1	68.5
High	Q9QYI3	DnaJ homolog subfamily C member 7 OS=Mus musculus OX=10090 GN=Dnajc7 PE=1 SV=2	1	1	1	56.4	25.9	24	39.5	15.8	24.2	15.5
High	Q69ZQ2	Pre-mRNA-splicing factor ISY1 homolog OS=Mus musculus OX=10090 GN=Isy1 PE=1 SV=2	1	1	1	33
High	Q91YP3	Deoxyribose-phosphate aldolase OS=Mus musculus OX=10090 GN=Dera PE=1 SV=1	1	1	1	35	99.9	120.9	117.2	76.8	103.8	145.9
High	Q9Z127	Large neutral amino acids transporter small subunit 1 OS=Mus musculus OX=10090 GN=Slc7a5 PE=1 SV=2	1	2	1	55.8
High	Q80UU2	Ribonuclease P protein subunit p38 OS=Mus musculus OX=10090 GN=Rpp38 PE=1 SV=1	1	1	1	31.1
High	O08759	Ubiquitin-protein ligase E3A OS=Mus musculus OX=10090 GN=Ube3a PE=1 SV=2	1	1	1	99.8	26	32.5	43.6	12.1	20	14.4
High	P28063	Proteasome subunit beta type-8 OS=Mus musculus OX=10090 GN=Psmb8 PE=1 SV=2	1	1	1	30.2
High	Q99PT1	Rho GDP-dissociation inhibitor 1 OS=Mus musculus OX=10090 GN=Arhgdia PE=1 SV=3	1	2	1	23.4	37.2	54.6	153.8	107.4	76.5	208.8
High	Q8R418	Endoribonuclease Dicer OS=Mus musculus OX=10090 GN=Dicer1 PE=1 SV=3	1	1	1	216.7
High	Q6PGH1	Protein BUD31 homolog OS=Mus musculus OX=10090 GN=Bud31 PE=1 SV=2	1	2	1	17	131	156.8	188.1	91.6	162.9	60.2
High	Q9EQ28	DNA polymerase delta subunit 3 OS=Mus musculus OX=10090 GN=Pold3 PE=1 SV=2	1	1	1	50.8
High	Q9CRT8	Exportin-T OS=Mus musculus OX=10090 GN=Xpot PE=1 SV=3	1	1	1	109.7	48.3	59.8	84.7	19.9	33.2	32.3
High	Q9CQA1	Trafficking protein particle complex subunit 5 OS=Mus musculus OX=10090 GN=Trappc5 PE=1 SV=1	1	1	1	20.8
High	Q61466	SWI/SNF-related matrix-associated actin-dependent regulator of chromatin subfamily D member 1 OS=Mus musculus OX=10090 GN=Smarcd1 PE=1 SV=3	1	1	1	58.2
High	P35486	Pyruvate dehydrogenase E1 component subunit alpha, somatic form, mitochondrial OS=Mus musculus OX=10090 GN=Pdha1 PE=1 SV=1	1	1	1	43.2
High	Q920L1	Acyl-CoA (8-3)-desaturase OS=Mus musculus OX=10090 GN=Fads1 PE=1 SV=1	1	1	1	52.3
High	Q64299	CCN family member 3 OS=Mus musculus OX=10090 GN=Ccn3 PE=1 SV=1	1	1	1	38.9
High	P41216	Long-chain-fatty-acid--CoA ligase 1 OS=Mus musculus OX=10090 GN=Acsl1 PE=1 SV=2	1	1	1	77.9	31.5	49.8	77.2	7	8	16.1
High	Q8BIG4	F-box only protein 28 OS=Mus musculus OX=10090 GN=Fbxo28 PE=1 SV=1	1	1	1	41	15.7	13.6	23.6	35.1	36.4	171.6
High	Q8BJY1	26S proteasome non-ATPase regulatory subunit 5 OS=Mus musculus OX=10090 GN=Psmd5 PE=1 SV=4	1	1	1	55.9	20.8	37.2	49.1	8.1	10.8	36.6
High	O70133	ATP-dependent RNA helicase A OS=Mus musculus OX=10090 GN=Dhx9 PE=1 SV=2	1	1	1	149.4
High	Q8QZY1	Eukaryotic translation initiation factor 3 subunit L OS=Mus musculus OX=10090 GN=Eif3l PE=1 SV=1	1	1	1	66.6
High	Q8BGZ4	Cell division cycle protein 23 homolog OS=Mus musculus OX=10090 GN=Cdc23 PE=1 SV=2	1	1	1	68.5
High	Q80WR5	UPF0688 protein C1orf174 homolog OS=Mus musculus OX=10090 PE=1 SV=1	1	1	1	24.8	54.8	57.8	75.9	4.1	3.6	4.1
High	Q8BZN6	Dedicator of cytokinesis protein 10 OS=Mus musculus OX=10090 GN=Dock10 PE=1 SV=3	2	2	2	245.6
High	A6X919	Probable C-mannosyltransferase DPY19L1 OS=Mus musculus OX=10090 GN=Dpy19l1 PE=1 SV=1	1	1	1	84.1
High	P17433	Transcription factor PU.1 OS=Mus musculus OX=10090 GN=Spi1 PE=1 SV=2	1	1	1	31.3	25.2	24.5	25.1	23.1	96.3	92.8
High	Q8R1L4	ER lumen protein-retaining receptor 3 OS=Mus musculus OX=10090 GN=Kdelr3 PE=1 SV=1	1	1	1	25.1	82	121.2	173.4	92.5	72.3	76.7
High	A2AF47	Dedicator of cytokinesis protein 11 OS=Mus musculus OX=10090 GN=Dock11 PE=1 SV=1	1	1	1	237.6	22.7	24.4	36.6	24.6	25.4	24.1
High	Q7JJ13	Bromodomain-containing protein 2 OS=Mus musculus OX=10090 GN=Brd2 PE=1 SV=1	1	1	1	88	60.6	59	96.9	5.3	177.6	50.7
High	Q9JJ89	Coiled-coil domain-containing protein 86 OS=Mus musculus OX=10090 GN=Ccdc86 PE=1 SV=2	1	1	1	46.5	317.7	270.5	475.1	19.3	50.8	13.9
High	Q80WJ7	Protein LYRIC OS=Mus musculus OX=10090 GN=Mtdh PE=1 SV=1	1	1	1	63.8
High	Q80UJ7	Rab3 GTPase-activating protein catalytic subunit OS=Mus musculus OX=10090 GN=Rab3gap1 PE=1 SV=4	1	1	1	110.1
High	Q14B71	Cell division cycle-associated protein 2 OS=Mus musculus OX=10090 GN=Cdca2 PE=1 SV=2	1	1	1	106.3
High	P51943	Cyclin-A2 OS=Mus musculus OX=10090 GN=Ccna2 PE=1 SV=2	1	1	1	47.2
High	Q9JL15	Galectin-8 OS=Mus musculus OX=10090 GN=Lgals8 PE=1 SV=1	1	1	1	36.1	10.2	22.8	106.8	7.6	9.1	6
High	Q8R2T8	General transcription factor 3C polypeptide 5 OS=Mus musculus OX=10090 GN=Gtf3c5 PE=2 SV=2	1	1	1	60.5
High	P27048	Small nuclear ribonucleoprotein-associated protein B OS=Mus musculus OX=10090 GN=Snrpb PE=1 SV=1	1	1	1	23.6	36.5	33.4	49.5	17.7	9.5	17.6
High	Q99LG0	Ubiquitin carboxyl-terminal hydrolase 16 OS=Mus musculus OX=10090 GN=Usp16 PE=1 SV=2	1	1	1	93.4
High	Q3ULD5	Methylcrotonoyl-CoA carboxylase beta chain, mitochondrial OS=Mus musculus OX=10090 GN=Mccc2 PE=1 SV=1	1	1	1	61.3
High	Q7TT37	Elongator complex protein 1 OS=Mus musculus OX=10090 GN=Elp1 PE=1 SV=2	1	2	1	149.5
High	P24604	Tyrosine-protein kinase Tec OS=Mus musculus OX=10090 GN=Tec PE=1 SV=2	1	1	1	73.4
High	Q5DTM8	E3 ubiquitin-protein ligase BRE1A OS=Mus musculus OX=10090 GN=Rnf20 PE=1 SV=2	2	2	2	113.5
High	Q9D8X5	CCR4-NOT transcription complex subunit 8 OS=Mus musculus OX=10090 GN=Cnot8 PE=1 SV=1	1	1	1	33.6
High	P61971	Nuclear transport factor 2 OS=Mus musculus OX=10090 GN=Nutf2 PE=1 SV=1	1	1	1	14.5
High	P06801	NADP-dependent malic enzyme OS=Mus musculus OX=10090 GN=Me1 PE=1 SV=2	1	1	1	63.9	47.1	53.8	85.6	24.3	29.3	36.2
High	Q9WU56	tRNA pseudouridine synthase A OS=Mus musculus OX=10090 GN=Pus1 PE=1 SV=2	1	1	1	47.5
High	Q8BTS4	Nuclear pore complex protein Nup54 OS=Mus musculus OX=10090 GN=Nup54 PE=1 SV=1	1	1	1	55.7
High	Q99N48	Synaptotagmin-like protein 3 OS=Mus musculus OX=10090 GN=Sytl3 PE=1 SV=2	1	1	1	68.5
High	Q8CGC4	Protein LSM14 homolog B OS=Mus musculus OX=10090 GN=Lsm14b PE=1 SV=3	1	1	1	42.3	32.3	25.1	55.3			36.5
High	Q06185	ATP synthase subunit e, mitochondrial OS=Mus musculus OX=10090 GN=Atp5me PE=1 SV=2	1	1	1	8.2
High	Q5FWK3	Rho GTPase-activating protein 1 OS=Mus musculus OX=10090 GN=Arhgap1 PE=1 SV=1	1	1	1	50.4
High	Q3TUU5	Testis-expressed protein 30 OS=Mus musculus OX=10090 GN=Tex30 PE=1 SV=1	1	1	1	25.2	39.9	41.8	48	10.7	15.9	12.4
High	Q8BN21	Serine/threonine-protein kinase VRK2 OS=Mus musculus OX=10090 GN=Vrk2 PE=1 SV=2	1	1	1	58.1	29.4	35.8	42.7	7.8	2.5	8.9
High	F7BJB9	MORC family CW-type zinc finger protein 3 OS=Mus musculus OX=10090 GN=Morc3 PE=1 SV=1	1	1	1	106.5	20.3	21.8	28	9.5	21.9	13.5
High	Q01149	Collagen alpha-2(I) chain OS=Mus musculus OX=10090 GN=Col1a2 PE=1 SV=2	1	2	1	129.5	244.3	296.5	293.9	343.6	230.7	244.2
High	Q8CHT0	Delta-1-pyrroline-5-carboxylate dehydrogenase, mitochondrial OS=Mus musculus OX=10090 GN=Aldh4a1 PE=1 SV=3	1	1	1	61.8	28.7	37.5	37.4	26.2	10.1	11.1
High	Q9QY23	Plakophilin-3 OS=Mus musculus OX=10090 GN=Pkp3 PE=1 SV=2	1	1	1	87.3
High	Q8VC16	Leucine-rich repeat-containing protein 14 OS=Mus musculus OX=10090 GN=Lrrc14 PE=1 SV=1	1	1	1	54.9
High	Q922J9	Fatty acyl-CoA reductase 1 OS=Mus musculus OX=10090 GN=Far1 PE=1 SV=1	1	1	1	59.4	14.6	19	27.1	6.3	29.4	21.2
High	Q7TMK9	Heterogeneous nuclear ribonucleoprotein Q OS=Mus musculus OX=10090 GN=Syncrip PE=1 SV=2	1	1	1	69.6	58.2	51.1	114.1	47.5	40	108.6
High	Q61207	Prosaposin OS=Mus musculus OX=10090 GN=Psap PE=1 SV=2	1	1	1	61.4	61.8	38.9	104.3	47.2	47.8	105.7
High	Q8BPU7	Engulfment and cell motility protein 1 OS=Mus musculus OX=10090 GN=Elmo1 PE=1 SV=2	1	2	1	83.9
High	P57784	U2 small nuclear ribonucleoprotein A' OS=Mus musculus OX=10090 GN=Snrpa1 PE=1 SV=2	1	1	1	28.3	163.5	150.6	239.3	59.5	58.7	138
High	F8VQB6	Unconventional myosin-X OS=Mus musculus OX=10090 GN=Myo10 PE=1 SV=1	2	2	2	237.2
High	Q3U0B3	Dehydrogenase/reductase SDR family member 11 OS=Mus musculus OX=10090 GN=Dhrs11 PE=1 SV=1	1	1	1	28.3	19.3	27.8	45.2	7	7.8	10.2
High	Q3TJD7	PDZ and LIM domain protein 7 OS=Mus musculus OX=10090 GN=Pdlim7 PE=1 SV=1	1	1	1	50.1	20	28	41	20.2	17.7	22.6
High	Q569Z6	Thyroid hormone receptor-associated protein 3 OS=Mus musculus OX=10090 GN=Thrap3 PE=1 SV=1	2	2	2	108.1	113.2	144.3	217.4	9	19.7	18.6
High	O08976	Probasin OS=Mus musculus OX=10090 GN=Pbsn PE=2 SV=2	1	1	1	20.4	364.8	10.9	6.7			2.4
High	Q6P5D3	Putative ATP-dependent RNA helicase DHX57 OS=Mus musculus OX=10090 GN=Dhx57 PE=1 SV=2	1	1	1	155.7
High	Q9QXX8	Nuclear fragile X mental retardation-interacting protein 1 OS=Mus musculus OX=10090 GN=Nufip1 PE=1 SV=1	2	2	2	54.7	10.7	11.9	20.1	1.3	111.1	4.6
High	Q9D020	Cytosolic 5'-nucleotidase 3A OS=Mus musculus OX=10090 GN=Nt5c3a PE=1 SV=4	1	1	1	37.2
High	Q6NZQ2	Probable ATP-dependent RNA helicase DDX31 OS=Mus musculus OX=10090 GN=Ddx31 PE=2 SV=2	1	1	1	76.9
High	Q8R5H1	Ubiquitin carboxyl-terminal hydrolase 15 OS=Mus musculus OX=10090 GN=Usp15 PE=1 SV=1	1	1	1	112.3	119	146.3	251.4	85.2	117.4	108
High	P51174	Long-chain specific acyl-CoA dehydrogenase, mitochondrial OS=Mus musculus OX=10090 GN=Acadl PE=1 SV=2	1	2	1	47.9
High	Q9JI11	Serine/threonine-protein kinase 4 OS=Mus musculus OX=10090 GN=Stk4 PE=1 SV=1	1	1	1	55.5	24.2	34.2	47	66.6	12	38.2
High	Q61249	Immunoglobulin-binding protein 1 OS=Mus musculus OX=10090 GN=Igbp1 PE=1 SV=1	1	1	1	38.9
High	Q9DC23	DnaJ homolog subfamily C member 10 OS=Mus musculus OX=10090 GN=Dnajc10 PE=1 SV=2	1	1	1	90.5
High	Q8C129	Leucyl-cystinyl aminopeptidase OS=Mus musculus OX=10090 GN=Lnpep PE=1 SV=1	1	1	1	117.2
High	Q62189	U1 small nuclear ribonucleoprotein A OS=Mus musculus OX=10090 GN=Snrpa PE=1 SV=3	1	1	1	31.8	48.3	53.6	101.7	18.2	8.3	22.8
High	P35123	Ubiquitin carboxyl-terminal hydrolase 4 OS=Mus musculus OX=10090 GN=Usp4 PE=1 SV=3	1	1	1	108.3	43.4	64.6	109.3	20.1	29.7	32.1
High	Q91X83	S-adenosylmethionine synthase isoform type-1 OS=Mus musculus OX=10090 GN=Mat1a PE=1 SV=1	1	2	1	43.5
High	D0QMC3	Myeloid cell nuclear differentiation antigen-like protein OS=Mus musculus OX=10090 GN=Mndal PE=1 SV=1	1	1	1	60.5	4.3	3.9	3.9	7.5	116.4	24.2
High	Q62267	Cornifin-B OS=Mus musculus OX=10090 GN=Sprr1b PE=2 SV=1	1	2	1	16.6
High	P83877	Thioredoxin-like protein 4A OS=Mus musculus OX=10090 GN=Txnl4a PE=1 SV=1	1	1	1	16.8
High	Q99LD9	Translation initiation factor eIF-2B subunit beta OS=Mus musculus OX=10090 GN=Eif2b2 PE=1 SV=1	1	1	1	38.9	79	110.2	127.6	31.3	65	97
High	Q05921	2-5A-dependent ribonuclease OS=Mus musculus OX=10090 GN=Rnasel PE=1 SV=2	1	1	1	83.2	10	23.8	28.7	16.1	15.3	11.6
High	Q9D706	RNA polymerase II-associated protein 3 OS=Mus musculus OX=10090 GN=Rpap3 PE=1 SV=1	1	1	1	74.1
High	Q9WTL4	Insulin receptor-related protein OS=Mus musculus OX=10090 GN=Insrr PE=1 SV=2	2	2	2	144.8	238	70.8	81.7	127.2	224.5	172.7
High	Q9JJA4	Ribosome biogenesis protein WDR12 OS=Mus musculus OX=10090 GN=Wdr12 PE=1 SV=1	1	1	1	47.3	40.1	48.3	38.1	38.9	95.7	138.4
High	Q9EST5	Acidic leucine-rich nuclear phosphoprotein 32 family member B OS=Mus musculus OX=10090 GN=Anp32b PE=1 SV=1	1	1	1	31.1	55	78.8	135.3	57.2	67.9	118.9
High	Q91W50	Cold shock domain-containing protein E1 OS=Mus musculus OX=10090 GN=Csde1 PE=1 SV=1	1	1	1	88.7	122.1	150.5	226.2	65.6	72.7	88.9
High	P13609	Serglycin OS=Mus musculus OX=10090 GN=Srgn PE=1 SV=1	1	1	1	16.7
High	Q9D8W5	26S proteasome non-ATPase regulatory subunit 12 OS=Mus musculus OX=10090 GN=Psmd12 PE=1 SV=4	1	1	1	52.9	49	69.1	127.3	43.1	60.2	60.5
High	Q8BMG7	Rab3 GTPase-activating protein non-catalytic subunit OS=Mus musculus OX=10090 GN=Rab3gap2 PE=1 SV=2	1	1	1	152.4	36.6	55.4	85.5	8.1	17.9	23.4
High	D3YXK2	Scaffold attachment factor B1 OS=Mus musculus OX=10090 GN=Safb PE=1 SV=2	1	1	1	105
High	P47930	Fos-related antigen 2 OS=Mus musculus OX=10090 GN=Fosl2 PE=1 SV=2	1	1	1	35.3
High	Q61686	Chromobox protein homolog 5 OS=Mus musculus OX=10090 GN=Cbx5 PE=1 SV=1	1	2	1	22.2	340.6	280.5	331.3	17.3	17.6	35.3
High	Q9JHS3	Ragulator complex protein LAMTOR2 OS=Mus musculus OX=10090 GN=Lamtor2 PE=1 SV=1	1	2	1	13.5
High	Q8BUH8	Sentrin-specific protease 7 OS=Mus musculus OX=10090 GN=Senp7 PE=1 SV=1	1	1	1	116.3
High	Q9JJY4	Probable ATP-dependent RNA helicase DDX20 OS=Mus musculus OX=10090 GN=Ddx20 PE=1 SV=2	1	1	1	91.7
High	Q9DC48	Pre-mRNA-processing factor 17 OS=Mus musculus OX=10090 GN=Cdc40 PE=1 SV=1	1	1	1	65.4	11.1	9.5	11.1	48.8	33.6	76.7
High	P25799	Nuclear factor NF-kappa-B p105 subunit OS=Mus musculus OX=10090 GN=Nfkb1 PE=1 SV=2	1	1	1	105.5
High	Q9Z2B9	Ribosomal protein S6 kinase alpha-4 OS=Mus musculus OX=10090 GN=Rps6ka4 PE=1 SV=2	1	1	1	85.6
High	Q91YM4	FAST kinase domain-containing protein 4 OS=Mus musculus OX=10090 GN=Tbrg4 PE=1 SV=1	1	1	1	71.5
High	E9Q5F9	Histone-lysine N-methyltransferase SETD2 OS=Mus musculus OX=10090 GN=Setd2 PE=1 SV=1	1	1	1	285.5	51.5	98.7	142.6	16.1	10.6	10.1
High	B2RQC2	Ubiquitin carboxyl-terminal hydrolase 42 OS=Mus musculus OX=10090 GN=Usp42 PE=1 SV=1	1	1	1	146.1
High	Q6ZPE2	Myotubularin-related protein 5 OS=Mus musculus OX=10090 GN=Sbf1 PE=1 SV=2	1	1	1	208.6
High	P28653	Biglycan OS=Mus musculus OX=10090 GN=Bgn PE=1 SV=1	1	1	1	41.6
High	Q7TSI3	Serine/threonine-protein phosphatase 6 regulatory subunit 1 OS=Mus musculus OX=10090 GN=Ppp6r1 PE=1 SV=1	1	1	1	94.5	24.8	30	40.7	10.2	10.9	25.1
High	Q61024	Asparagine synthetase [glutamine-hydrolyzing] OS=Mus musculus OX=10090 GN=Asns PE=1 SV=3	2	2	2	64.2	47.1	29.7	75.3	17.5	19.4	33.1
High	Q8JZR0	Long-chain-fatty-acid--CoA ligase 5 OS=Mus musculus OX=10090 GN=Acsl5 PE=1 SV=1	1	1	1	76.2
High	A2A6Q5	Cell division cycle protein 27 homolog OS=Mus musculus OX=10090 GN=Cdc27 PE=1 SV=1	1	1	1	91.8
High	Q61818	Retinoic acid-induced protein 1 OS=Mus musculus OX=10090 GN=Rai1 PE=1 SV=3	1	1	1	201.4
High	P56399	Ubiquitin carboxyl-terminal hydrolase 5 OS=Mus musculus OX=10090 GN=Usp5 PE=1 SV=1	1	1	1	95.8
High	O08967	Cytohesin-3 OS=Mus musculus OX=10090 GN=Cyth3 PE=1 SV=1	1	1	1	46.3
High	Q9JJX6	P2X purinoceptor 4 OS=Mus musculus OX=10090 GN=P2rx4 PE=1 SV=1	1	1	1	43.4	13	12	22.9	41.8	8.9	27.4
High	P48725	Pericentrin OS=Mus musculus OX=10090 GN=Pcnt PE=1 SV=2	1	3	1	329.3	17	21.7	23.1	964.9	128.2	2366.4
High	P97855	Ras GTPase-activating protein-binding protein 1 OS=Mus musculus OX=10090 GN=G3bp1 PE=1 SV=1	1	1	1	51.8
High	P97432	Next to BRCA1 gene 1 protein OS=Mus musculus OX=10090 GN=Nbr1 PE=1 SV=1	1	1	1	109.9
High	Q61210	Rho guanine nucleotide exchange factor 1 OS=Mus musculus OX=10090 GN=Arhgef1 PE=1 SV=2	1	1	1	102.7	57.1	63.7	101.9	49.5	50.1	49.1
High	Q7TMB8	Cytoplasmic FMR1-interacting protein 1 OS=Mus musculus OX=10090 GN=Cyfip1 PE=1 SV=1	1	1	1	145.1	42	59	72.6	56.9	99.6	80.6
High	Q9D7J7	Calpain small subunit 2 OS=Mus musculus OX=10090 GN=Capns2 PE=2 SV=1	1	1	1	27.2
High	Q921W4	Quinone oxidoreductase-like protein 1 OS=Mus musculus OX=10090 GN=Cryzl1 PE=1 SV=1	1	1	1	38.7
High	P97814	Proline-serine-threonine phosphatase-interacting protein 1 OS=Mus musculus OX=10090 GN=Pstpip1 PE=1 SV=1	1	1	1	47.6	4.5	3.1	5.7	27.5	57.9	66.5
High	P28658	Ataxin-10 OS=Mus musculus OX=10090 GN=Atxn10 PE=1 SV=2	1	1	1	53.7	26.3	45.5	59.4	5.9	13.6	14.2
High	Q9QZR0	E3 ubiquitin-protein ligase RNF25 OS=Mus musculus OX=10090 GN=Rnf25 PE=1 SV=2	1	1	1	51.2
High	Q62276	Mediator of RNA polymerase II transcription subunit 22 OS=Mus musculus OX=10090 GN=Med22 PE=1 SV=2	1	1	1	22.3	38.8	32.1	41.2	12.5	9.4	15.1
High	Q9WV70	Nucleolar complex protein 2 homolog OS=Mus musculus OX=10090 GN=Noc2l PE=1 SV=2	1	1	1	85.4
High	Q91YY4	ATP synthase mitochondrial F1 complex assembly factor 2 OS=Mus musculus OX=10090 GN=Atpaf2 PE=1 SV=1	1	1	1	33.3
High	Q9CWY9	RPA-interacting protein OS=Mus musculus OX=10090 GN=Rpain PE=1 SV=1	1	1	1	24.9
High	Q9ERE3	Serine/threonine-protein kinase Sgk3 OS=Mus musculus OX=10090 GN=Sgk3 PE=1 SV=1	1	1	1	57.1
High	Q91WM2	Haloacid dehalogenase-like hydrolase domain-containing 5 OS=Mus musculus OX=10090 GN=Hdhd5 PE=1 SV=1	1	1	1	46.3
High	Q8R1F6	Protein HID1 OS=Mus musculus OX=10090 GN=Hid1 PE=1 SV=1	1	1	1	88.7
High	P53569	CCAAT/enhancer-binding protein zeta OS=Mus musculus OX=10090 GN=Cebpz PE=1 SV=2	1	1	1	120.2	76.4	51.6	68.2	3.5	10.7	13.4
High	O35841	Apoptosis inhibitor 5 OS=Mus musculus OX=10090 GN=Api5 PE=1 SV=2	1	1	1	56.8
High	P12787	Cytochrome c oxidase subunit 5A, mitochondrial OS=Mus musculus OX=10090 GN=Cox5a PE=1 SV=2	1	1	1	16.1	41.8	47.2	106.8	48.6	29.8	119.5
High	Q3UW53	Protein Niban 1 OS=Mus musculus OX=10090 GN=Niban1 PE=1 SV=2	1	1	1	102.6	5.9		7.5	30.1	25.5	42
High	Q9CQI6	Coactosin-like protein OS=Mus musculus OX=10090 GN=Cotl1 PE=1 SV=3	1	2	1	15.9	44.5	71.6	114.1	158.4	114.3	255.2
High	Q8BIE6	FERM domain-containing protein 4A OS=Mus musculus OX=10090 GN=Frmd4a PE=1 SV=2	1	1	1	113.8
High	Q8K3A9	7SK snRNA methylphosphate capping enzyme OS=Mus musculus OX=10090 GN=Mepce PE=1 SV=2	1	1	1	72
High	O08605	MAP kinase-interacting serine/threonine-protein kinase 1 OS=Mus musculus OX=10090 GN=Mknk1 PE=1 SV=2	1	1	1	47.9
High	Q61510	E3 ubiquitin/ISG15 ligase TRIM25 OS=Mus musculus OX=10090 GN=Trim25 PE=1 SV=2	1	1	1	71.7
High	A2AN08	E3 ubiquitin-protein ligase UBR4 OS=Mus musculus OX=10090 GN=Ubr4 PE=1 SV=1	1	1	1	571.9
High	Q6P3D0	U8 snoRNA-decapping enzyme OS=Mus musculus OX=10090 GN=Nudt16 PE=1 SV=1	1	2	1	21.8
High	Q8K0D5	Elongation factor G, mitochondrial OS=Mus musculus OX=10090 GN=Gfm1 PE=1 SV=1	1	1	1	83.5
High	Q3TWW8	Serine/arginine-rich splicing factor 6 OS=Mus musculus OX=10090 GN=Srsf6 PE=1 SV=1	1	1	1	39	53.3	70.7	109.1	40.3	40.8	59.5
High	P68404	Protein kinase C beta type OS=Mus musculus OX=10090 GN=Prkcb PE=1 SV=4	1	1	1	76.7	14	16.5	17.6	290.4	59.4	115.8
High	Q9ESZ8	General transcription factor II-I OS=Mus musculus OX=10090 GN=Gtf2i PE=1 SV=3	1	1	1	112.2
High	Q8BX57	PX domain-containing protein kinase-like protein OS=Mus musculus OX=10090 GN=Pxk PE=1 SV=2	1	1	1	65.2
High	Q9Z104	SWI/SNF-related matrix-associated actin-dependent regulator of chromatin subfamily E member 1-related OS=Mus musculus OX=10090 GN=Hmg20b PE=1 SV=1	1	1	1	35.8
High	Q9JLZ6	Hypermethylated in cancer 2 protein OS=Mus musculus OX=10090 GN=Hic2 PE=2 SV=4	1	1	1	66.7	63.5	27	151.2	3	6.2	7.2
High	A2AIV2	Protein virilizer homolog OS=Mus musculus OX=10090 GN=Virma PE=1 SV=1	1	1	1	201.3
High	Q8BGG7	Ubiquitin-associated and SH3 domain-containing protein B OS=Mus musculus OX=10090 GN=Ubash3b PE=1 SV=1	1	1	1	71.4	5.7	6.3	11.8	68	16.1	38.7
High	Q8R3H7	Heparan sulfate 2-O-sulfotransferase 1 OS=Mus musculus OX=10090 GN=Hs2st1 PE=1 SV=2	1	1	1	41.8
High	Q9D7S9	Charged multivesicular body protein 5 OS=Mus musculus OX=10090 GN=Chmp5 PE=1 SV=1	1	1	1	24.6	64.2	64.1	112	86.8	77.2	122
High	Q8BMJ2	Leucine--tRNA ligase, cytoplasmic OS=Mus musculus OX=10090 GN=Lars1 PE=1 SV=2	1	1	1	134.1
High	P49722	Proteasome subunit alpha type-2 OS=Mus musculus OX=10090 GN=Psma2 PE=1 SV=3	1	1	1	25.9
High	Q8CIS0	Caspase recruitment domain-containing protein 11 OS=Mus musculus OX=10090 GN=Card11 PE=1 SV=2	2	2	1	134
High	Q9CZX5	PIN2/TERF1-interacting telomerase inhibitor 1 OS=Mus musculus OX=10090 GN=Pinx1 PE=1 SV=2	1	1	1	37.2	42.4	45.7	111.5	21.4	13.8	38
High	O70562	Small proline-rich protein 2K OS=Mus musculus OX=10090 GN=Sprr2k PE=2 SV=1	1	1	1	7.5	68.3	17.6	62.6	63.6	51.6	44.3
High	Q9JHF7	Hematopoietic prostaglandin D synthase OS=Mus musculus OX=10090 GN=Hpgds PE=1 SV=3	1	1	1	23.2	98.2	168	172.2	83.5	47.8	45.3
High	P84089	Enhancer of rudimentary homolog OS=Mus musculus OX=10090 GN=Erh PE=1 SV=1	1	2	1	12.3	126.3	96.4	176.6	41.5	42.6	67.5
High	Q91ZR2	Sorting nexin-18 OS=Mus musculus OX=10090 GN=Snx18 PE=1 SV=1	2	2	2	67.9	31.8	49.7	37.1	16	110.5	110.8
High	P51660	Peroxisomal multifunctional enzyme type 2 OS=Mus musculus OX=10090 GN=Hsd17b4 PE=1 SV=3	1	1	1	79.4
High	Q9Z265	Serine/threonine-protein kinase Chk2 OS=Mus musculus OX=10090 GN=Chek2 PE=1 SV=1	1	1	1	61
High	P08228	Superoxide dismutase [Cu-Zn] OS=Mus musculus OX=10090 GN=Sod1 PE=1 SV=2	1	1	1	15.9	47.3	31.3	73.4	34.2	26.3	63.9
High	Q8BTV2	Cleavage and polyadenylation specificity factor subunit 7 OS=Mus musculus OX=10090 GN=Cpsf7 PE=1 SV=2	1	1	1	52	25.4	26.2	36.9	5.3	6.3	6.8
High	Q925J9	Mediator of RNA polymerase II transcription subunit 1 OS=Mus musculus OX=10090 GN=Med1 PE=1 SV=2	1	1	1	167
High	Q8CCJ3	E3 UFM1-protein ligase 1 OS=Mus musculus OX=10090 GN=Ufl1 PE=1 SV=2	1	1	1	89.5
High	P45481	Histone lysine acetyltransferase CREBBP OS=Mus musculus OX=10090 GN=Crebbp PE=1 SV=3	1	1	1	265.3
High	Q9DCT6	Chromatin complexes subunit BAP18 OS=Mus musculus OX=10090 GN=Bap18 PE=1 SV=1	1	1	1	18	91.7	78.2	96	9.3	7.9	11.6
High	Q9R008	Mevalonate kinase OS=Mus musculus OX=10090 GN=Mvk PE=1 SV=1	1	1	1	41.9	41.1	50.7	52.1	47.3	39.8	43.3
High	P63011	Ras-related protein Rab-3A OS=Mus musculus OX=10090 GN=Rab3a PE=1 SV=1	1	1	1	25	13	21	21.4	21.8	26.9	17.1
High	Q61239	Protein farnesyltransferase/geranylgeranyltransferase type-1 subunit alpha OS=Mus musculus OX=10090 GN=Fnta PE=1 SV=1	1	1	1	44
High	P97789	5'-3' exoribonuclease 1 OS=Mus musculus OX=10090 GN=Xrn1 PE=1 SV=1	1	1	1	194.2
High	Q8BGX2	Mitochondrial import inner membrane translocase subunit Tim29 OS=Mus musculus OX=10090 GN=Timm29 PE=1 SV=1	1	1	1	29.4	26.4	30.3	41.6	7	8.3	8.3
High	P03911	NADH-ubiquinone oxidoreductase chain 4 OS=Mus musculus OX=10090 GN=Mtnd4 PE=1 SV=1	1	1	1	51.8
High	P62317	Small nuclear ribonucleoprotein Sm D2 OS=Mus musculus OX=10090 GN=Snrpd2 PE=1 SV=1	1	1	1	13.5
High	O08738	Caspase-6 OS=Mus musculus OX=10090 GN=Casp6 PE=1 SV=1	1	1	1	31.6	10.7	17	31	6.8	18.6	22.8
High	Q91WB4	Pleckstrin homology domain-containing family F member 2 OS=Mus musculus OX=10090 GN=Plekhf2 PE=1 SV=1	1	1	1	27.7	31.1	43.7	36.4	44	64.5	50.9
High	Q9D0D3	Poly(A) RNA polymerase, mitochondrial OS=Mus musculus OX=10090 GN=Mtpap PE=1 SV=1	1	1	1	65.2
High	Q61102	Iron-sulfur clusters transporter ABCB7, mitochondrial OS=Mus musculus OX=10090 GN=Abcb7 PE=1 SV=3	1	1	1	82.5
High	Q80U70	Polycomb protein Suz12 OS=Mus musculus OX=10090 GN=Suz12 PE=1 SV=2	1	1	1	83
High	Q9QXT1	Dual adapter for phosphotyrosine and 3-phosphotyrosine and 3-phosphoinositide OS=Mus musculus OX=10090 GN=Dapp1 PE=1 SV=1	1	1	1	32.1
High	Q8BVQ5	Protein phosphatase methylesterase 1 OS=Mus musculus OX=10090 GN=Ppme1 PE=1 SV=5	1	1	1	42.2
High	P46412	Glutathione peroxidase 3 OS=Mus musculus OX=10090 GN=Gpx3 PE=1 SV=2	1	1	1	25.4	111.9	111.5	126.2	69.9	84.9	73.5
High	Q2TBE6	Phosphatidylinositol 4-kinase type 2-alpha OS=Mus musculus OX=10090 GN=Pi4k2a PE=1 SV=1	1	1	1	54.2
High	P00405	Cytochrome c oxidase subunit 2 OS=Mus musculus OX=10090 GN=Mtco2 PE=1 SV=1	1	1	1	26
High	Q03347	Runt-related transcription factor 1 OS=Mus musculus OX=10090 GN=Runx1 PE=1 SV=1	1	1	1	48.6	120	118.4	125.9	101.6	22.5	52.7
High	Q8CDM1	ATPase family AAA domain-containing protein 2 OS=Mus musculus OX=10090 GN=Atad2 PE=1 SV=1	1	1	1	117.9	66.1	60.2	72.3	11.1	30	22.8
High	Q8K4Q0	Regulatory-associated protein of mTOR OS=Mus musculus OX=10090 GN=Rptor PE=1 SV=1	1	1	1	149.4
High	Q9CQH3	NADH dehydrogenase [ubiquinone] 1 beta subcomplex subunit 5, mitochondrial OS=Mus musculus OX=10090 GN=Ndufb5 PE=1 SV=1	1	1	1	21.7
High	Q5SUR0	Phosphoribosylformylglycinamidine synthase OS=Mus musculus OX=10090 GN=Pfas PE=1 SV=1	1	1	1	144.5
High	Q8VDP4	Cell cycle and apoptosis regulator protein 2 OS=Mus musculus OX=10090 GN=Ccar2 PE=1 SV=2	1	1	1	102.9	21	21.4	37.9	12.1	7.6	12.1
High	Q80YR4	E3 ubiquitin-protein ligase ZNF598 OS=Mus musculus OX=10090 GN=Znf598 PE=1 SV=1	1	1	1	99.1
High	P11352	Glutathione peroxidase 1 OS=Mus musculus OX=10090 GN=Gpx1 PE=1 SV=2	1	1	1	22.3
High	Q8VE18	Nonsense-mediated mRNA decay factor SMG8 OS=Mus musculus OX=10090 GN=Smg8 PE=1 SV=1	1	1	1	109.6
High	Q80VD1	Protein FAM98B OS=Mus musculus OX=10090 GN=Fam98b PE=1 SV=1	1	1	1	45.3	32.9	46.3	66.8	30.6	12.2	18.9
High	Q9QXA5	U6 snRNA-associated Sm-like protein LSm4 OS=Mus musculus OX=10090 GN=Lsm4 PE=1 SV=1	1	1	1	15.1	183.6	27.7	40.7	29.4	68.5	80.3
High	Q6NS46	Protein RRP5 homolog OS=Mus musculus OX=10090 GN=Pdcd11 PE=1 SV=2	1	1	1	207.6
High	O35343	Importin subunit alpha-3 OS=Mus musculus OX=10090 GN=Kpna4 PE=1 SV=1	1	1	1	57.9	71.7	103.1	139.9	6.8	15.3	18
High	Q66JS6	Eukaryotic translation initiation factor 3 subunit J-B OS=Mus musculus OX=10090 GN=Eif3j2 PE=1 SV=1	1	1	1	29.5
High	B1AX39	Zinc finger CCHC domain-containing protein 7 OS=Mus musculus OX=10090 GN=Zcchc7 PE=2 SV=1	1	1	1	63	69	66.6	91.2	4.8	5.1	10.1
High	O35658	Complement component 1 Q subcomponent-binding protein, mitochondrial OS=Mus musculus OX=10090 GN=C1qbp PE=1 SV=1	1	1	1	31
High	P06336	Ig epsilon chain C region OS=Mus musculus OX=10090 PE=4 SV=2	1	1	1	47.3
High	Q8C407	Protein YIPF4 OS=Mus musculus OX=10090 GN=Yipf4 PE=1 SV=1	1	1	1	27.3
High	Q9JMA1	Ubiquitin carboxyl-terminal hydrolase 14 OS=Mus musculus OX=10090 GN=Usp14 PE=1 SV=3	1	1	1	56
High	P01626	Ig kappa chain V-II region MOPC 167 OS=Mus musculus OX=10090 PE=1 SV=1	1	1	1	12.3	118.2	153.6	129.4	104	129	99
High	Q9D4H8	Cullin-2 OS=Mus musculus OX=10090 GN=Cul2 PE=1 SV=2	1	1	1	86.8	134.4	108.7	134.7	25.8	36.6	29.6
High	Q6PF93	Phosphatidylinositol 3-kinase catalytic subunit type 3 OS=Mus musculus OX=10090 GN=Pik3c3 PE=1 SV=1	1	1	1	101.4	6.7	3.8	8.9	75.7	49.5	179.6
High	Q8BGC0	HIV Tat-specific factor 1 homolog OS=Mus musculus OX=10090 GN=Htatsf1 PE=1 SV=1	1	1	1	86.2
High	Q3TPX4	Exocyst complex component 5 OS=Mus musculus OX=10090 GN=Exoc5 PE=1 SV=2	1	1	1	81.7
High	Q9Z2U2	Zinc finger protein 292 OS=Mus musculus OX=10090 GN=Zfp292 PE=1 SV=2	1	1	1	300.9
High	O70362	Phosphatidylinositol-glycan-specific phospholipase D OS=Mus musculus OX=10090 GN=Gpld1 PE=1 SV=1	1	1	1	93.2
High	Q9Z1X9	Cell division control protein 45 homolog OS=Mus musculus OX=10090 GN=Cdc45 PE=1 SV=2	1	1	1	65.3
High	Q05D44	Eukaryotic translation initiation factor 5B OS=Mus musculus OX=10090 GN=Eif5b PE=1 SV=2	1	1	1	137.5	81.8	89.3	137.7	12	14.8	8.9
High	A6H619	PHD and RING finger domain-containing protein 1 OS=Mus musculus OX=10090 GN=Phrf1 PE=1 SV=2	1	1	1	184	78.8	75.9	88.8	2.6	4.5	4.5
High	Q9Z1S8	GRB2-associated-binding protein 2 OS=Mus musculus OX=10090 GN=Gab2 PE=1 SV=2	1	1	1	73.2	33.9	28.8	35.6	14.8	16.2	5.5
High	Q62415	Apoptosis-stimulating of p53 protein 1 OS=Mus musculus OX=10090 GN=Ppp1r13b PE=1 SV=2	1	1	1	119.1	46.5	53.3	62.9	8.5	10	9.4
High	O08811	General transcription and DNA repair factor IIH helicase subunit XPD OS=Mus musculus OX=10090 GN=Ercc2 PE=1 SV=2	1	1	1	86.8
High	P57759	Endoplasmic reticulum resident protein 29 OS=Mus musculus OX=10090 GN=Erp29 PE=1 SV=2	1	1	1	28.8	15.8	15.9	48.2	18.4	17.4	33.8
High	Q3UQ84	Threonine--tRNA ligase, mitochondrial OS=Mus musculus OX=10090 GN=Tars2 PE=1 SV=1	1	1	1	81.6
High	Q9DAW6	U4/U6 small nuclear ribonucleoprotein Prp4 OS=Mus musculus OX=10090 GN=Prpf4 PE=1 SV=1	1	1	1	58.3
High	Q9CZ82	Mediator of RNA polymerase II transcription subunit 18 OS=Mus musculus OX=10090 GN=Med18 PE=1 SV=1	1	1	1	23.6	47.6	50.1	54.5	3.7	9.5	6.4
High	Q9CY02	Alpha-hemoglobin-stabilizing protein OS=Mus musculus OX=10090 GN=Ahsp PE=1 SV=1	1	1	1	11.8	67.9	107.8	269.4	11.8	6.9	39.9
High	Q80WC7	Arf-GAP domain and FG repeat-containing protein 2 OS=Mus musculus OX=10090 GN=Agfg2 PE=1 SV=1	1	1	1	48.9
High	E9Q5K9	YTH domain-containing protein 1 OS=Mus musculus OX=10090 GN=Ythdc1 PE=1 SV=2	1	1	1	85.6	103	94.6	134.2	6	21
High	Q8BUR4	Dedicator of cytokinesis protein 1 OS=Mus musculus OX=10090 GN=Dock1 PE=1 SV=3	1	1	1	214.9
High	P55849	Desmocollin-1 OS=Mus musculus OX=10090 GN=Dsc1 PE=1 SV=2	1	2	1	98.9	105.6	52.4	160.2	132.9	72	77.5
High	Q8C4Y3	Negative elongation factor B OS=Mus musculus OX=10090 GN=Nelfb PE=1 SV=2	1	1	1	65.6
High	Q99KD5	Protein unc-45 homolog A OS=Mus musculus OX=10090 GN=Unc45a PE=1 SV=2	1	1	1	103.4	14.1	32.8	73.6	6.5	3.2	2.5
High	P57746	V-type proton ATPase subunit D OS=Mus musculus OX=10090 GN=Atp6v1d PE=1 SV=1	1	1	1	28.4
High	Q9WTQ8	Mitochondrial import inner membrane translocase subunit Tim23 OS=Mus musculus OX=10090 GN=Timm23 PE=1 SV=1	1	1	1	22	107.6	122.7	164.6	21.7	22.7	16.8
High	Q60864	Stress-induced-phosphoprotein 1 OS=Mus musculus OX=10090 GN=Stip1 PE=1 SV=1	1	1	1	62.5
High	P22366	Myeloid differentiation primary response protein MyD88 OS=Mus musculus OX=10090 GN=Myd88 PE=1 SV=3	1	1	1	33.7
High	O55201	Transcription elongation factor SPT5 OS=Mus musculus OX=10090 GN=Supt5h PE=1 SV=1	1	1	1	120.6
High	Q8BKZ9	Pyruvate dehydrogenase protein X component, mitochondrial OS=Mus musculus OX=10090 GN=Pdhx PE=1 SV=1	1	1	1	54	133.4	64.6	87.4	42.1	62.1	42.3
High	Q8VDP6	CDP-diacylglycerol--inositol 3-phosphatidyltransferase OS=Mus musculus OX=10090 GN=Cdipt PE=1 SV=1	1	2	1	23.6
High	Q920G8	Mitoferrin-1 OS=Mus musculus OX=10090 GN=Slc25a37 PE=1 SV=1	1	1	1	37.5
High	P22777	Plasminogen activator inhibitor 1 OS=Mus musculus OX=10090 GN=Serpine1 PE=1 SV=1	1	1	1	45.1
High	Q9CSH3	Exosome complex exonuclease RRP44 OS=Mus musculus OX=10090 GN=Dis3 PE=1 SV=4	1	1	1	108.8	53	71.7	73.4	22.9	53.1	40.3
High	Q8BFR6	AN1-type zinc finger protein 1 OS=Mus musculus OX=10090 GN=Zfand1 PE=1 SV=1	1	1	1	30.2	80.6	51.5	67.9		6.7	4
High	Q6PD03	Serine/threonine-protein phosphatase 2A 56 kDa regulatory subunit alpha isoform OS=Mus musculus OX=10090 GN=Ppp2r5a PE=1 SV=1	1	1	1	56.3
High	Q63836	Selenium-binding protein 2 OS=Mus musculus OX=10090 GN=Selenbp2 PE=1 SV=2	1	1	1	52.6
High	Q00899	Transcriptional repressor protein YY1 OS=Mus musculus OX=10090 GN=Yy1 PE=1 SV=1	1	1	1	44.7	155.3	241.9	259.8	3.4	5.6	3.6
High	Q9CX56	26S proteasome non-ATPase regulatory subunit 8 OS=Mus musculus OX=10090 GN=Psmd8 PE=1 SV=2	1	1	1	39.9	55.4	57.5	91.8	17.5	14.7	31.5
High	P00688	Pancreatic alpha-amylase OS=Mus musculus OX=10090 GN=Amy2 PE=1 SV=2	1	1	1	57.3
High	Q8BKS9	Pumilio homolog 3 OS=Mus musculus OX=10090 GN=Pum3 PE=1 SV=2	1	2	1	72.8	107.9	71.4	98.5	26.5	61.5	76.6
High	Q9QYB1	Chloride intracellular channel protein 4 OS=Mus musculus OX=10090 GN=Clic4 PE=1 SV=3	1	1	1	28.7	16.3	12.7	27.2	8.7	11.5	29.9
High	Q3U308	Cytoplasmic tRNA 2-thiolation protein 2 OS=Mus musculus OX=10090 GN=Ctu2 PE=1 SV=1	1	1	1	56.1
High	Q9D361	U11/U12 small nuclear ribonucleoprotein 48 kDa protein OS=Mus musculus OX=10090 GN=Snrnp48 PE=2 SV=2	1	1	1	39.4	225.4	254.1	346.3	9.1	10.4	9.7
High	O54833	Casein kinase II subunit alpha' OS=Mus musculus OX=10090 GN=Csnk2a2 PE=1 SV=1	1	1	1	41.2
High	Q7TMF5	Serpin A12 OS=Mus musculus OX=10090 GN=Serpina12 PE=1 SV=2	1	1	1	47.6
High	Q9DCU6	39S ribosomal protein L4, mitochondrial OS=Mus musculus OX=10090 GN=Mrpl4 PE=1 SV=1	1	1	1	33.1
High	P70265	6-phosphofructo-2-kinase/fructose-2,6-bisphosphatase 2 OS=Mus musculus OX=10090 GN=Pfkfb2 PE=1 SV=2	1	1	1	59.9
High	A2AGT5	Cytoskeleton-associated protein 5 OS=Mus musculus OX=10090 GN=Ckap5 PE=1 SV=1	1	1	1	225.5
High	Q9R171	Cerebellin-1 OS=Mus musculus OX=10090 GN=Cbln1 PE=1 SV=1	1	1	1	21.1	198.9	202.1	234.4	172.8	156.3	140.1
High	O55131	Septin-7 OS=Mus musculus OX=10090 GN=Septin7 PE=1 SV=1	1	1	1	50.5	87	82.4	183.2	72.3	40.7	139.4
High	O54931	A-kinase anchor protein 2 OS=Mus musculus OX=10090 GN=Akap2 PE=1 SV=3	1	1	1	98.5
High	Q8BH74	Nuclear pore complex protein Nup107 OS=Mus musculus OX=10090 GN=Nup107 PE=1 SV=1	1	1	1	106.7
High	Q8CH18	Cell division cycle and apoptosis regulator protein 1 OS=Mus musculus OX=10090 GN=Ccar1 PE=1 SV=1	1	1	1	132
High	P01831	Thy-1 membrane glycoprotein OS=Mus musculus OX=10090 GN=Thy1 PE=1 SV=1	1	1	1	18.1	21	46.7	262	7.4	9	21.7
High	Q3UGR5	Haloacid dehalogenase-like hydrolase domain-containing protein 2 OS=Mus musculus OX=10090 GN=Hdhd2 PE=1 SV=2	1	1	1	28.7
High	Q9QXW0	F-box/LRR-repeat protein 6 OS=Mus musculus OX=10090 GN=Fbxl6 PE=2 SV=2	1	1	1	59.2
High	O70551	SRSF protein kinase 1 OS=Mus musculus OX=10090 GN=Srpk1 PE=1 SV=2	1	1	1	73	42.1	61.7	63.7	41.6	31.8	50
High	P52432	DNA-directed RNA polymerases I and III subunit RPAC1 OS=Mus musculus OX=10090 GN=Polr1c PE=1 SV=3	1	1	1	39.1
High	O89090	Transcription factor Sp1 OS=Mus musculus OX=10090 GN=Sp1 PE=1 SV=2	1	1	1	80.7
High	P56581	G/T mismatch-specific thymine DNA glycosylase OS=Mus musculus OX=10090 GN=Tdg PE=1 SV=2	1	1	1	46.8
High	Q9WV34	MAGUK p55 subfamily member 2 OS=Mus musculus OX=10090 GN=Mpp2 PE=1 SV=1	1	1	1	61.5
High	P03893	NADH-ubiquinone oxidoreductase chain 2 OS=Mus musculus OX=10090 GN=mt-Nd2 PE=1 SV=2	1	1	1	38.7
High	Q9CWG9	Biogenesis of lysosome-related organelles complex 1 subunit 2 OS=Mus musculus OX=10090 GN=Bloc1s2 PE=1 SV=1	1	1	1	16.3
High	O35710	Nocturnin OS=Mus musculus OX=10090 GN=Noct PE=1 SV=3	1	1	1	48.3
High	Q6PGF3	Mediator of RNA polymerase II transcription subunit 16 OS=Mus musculus OX=10090 GN=Med16 PE=1 SV=2	1	1	1	91.7	29.1	24.5	29.1	28.4	22.1	11.9
High	Q8BHD8	Protein-L-isoaspartate O-methyltransferase domain-containing protein 2 OS=Mus musculus OX=10090 GN=Pcmtd2 PE=2 SV=1	1	1	1	40.7	38.7	62.9	52.2	8.5	10	7.9
High	Q9Z1E4	Glycogen [starch] synthase, muscle OS=Mus musculus OX=10090 GN=Gys1 PE=1 SV=2	1	1	1	83.9	21.2	8.4	9.9	30.2	30.8	40.7
High	P70349	Adenosine 5'-monophosphoramidase HINT1 OS=Mus musculus OX=10090 GN=Hint1 PE=1 SV=3	1	1	1	13.8	109	96.4	204.4	58.3	97.4	129.8
High	Q8BGS2	BolA-like protein 2 OS=Mus musculus OX=10090 GN=Bola2 PE=1 SV=1	1	1	1	10.2	116.7	138.1	191.4	44.3	67.5	76.9
High	Q60710	Deoxynucleoside triphosphate triphosphohydrolase SAMHD1 OS=Mus musculus OX=10090 GN=Samhd1 PE=1 SV=3	1	1	1	75.8	21.7	39.4	33.5	6.3	32.4	18.8
High	Q9D2H8	Fibronectin type III domain-containing protein 8 OS=Mus musculus OX=10090 GN=Fndc8 PE=2 SV=1	1	1	1	35.6	11.1	27	35.5	7.7	16.2	13.8
High	P50171	(3R)-3-hydroxyacyl-CoA dehydrogenase OS=Mus musculus OX=10090 GN=Hsd17b8 PE=1 SV=2	1	1	1	26.6
High	Q5SSH7	Zinc finger ZZ-type and EF-hand domain-containing protein 1 OS=Mus musculus OX=10090 GN=Zzef1 PE=1 SV=2	1	1	1	328.1
High	Q8VCM8	Nicalin OS=Mus musculus OX=10090 GN=Ncln PE=1 SV=2	1	1	1	62.9
High	P57787	Monocarboxylate transporter 4 OS=Mus musculus OX=10090 GN=Slc16a3 PE=1 SV=1	1	1	1	50.3
High	Q3V0C5	Ubiquitin carboxyl-terminal hydrolase 48 OS=Mus musculus OX=10090 GN=Usp48 PE=1 SV=2	1	1	1	120.6	5.7	9.2	13.4	1094.6	80.6	446.5
High	Q0KK55	Kinase non-catalytic C-lobe domain-containing protein 1 OS=Mus musculus OX=10090 GN=Kndc1 PE=1 SV=2	1	1	1	191.2	2.9	4.4	3.9			2095.1
High	Q9DCA5	Ribosome biogenesis protein BRX1 homolog OS=Mus musculus OX=10090 GN=Brix1 PE=1 SV=3	1	1	1	41.2
High	Q922H4	Mannose-1-phosphate guanyltransferase alpha OS=Mus musculus OX=10090 GN=Gmppa PE=1 SV=1	1	1	1	46.2
High	P59328	WD repeat and HMG-box DNA-binding protein 1 OS=Mus musculus OX=10090 GN=Wdhd1 PE=1 SV=2	1	1	1	124.2
High	Q9Z0E6	Guanylate-binding protein 2 OS=Mus musculus OX=10090 GN=Gbp2 PE=1 SV=1	1	1	1	66.7
High	Q8BPM0	Disheveled-associated activator of morphogenesis 1 OS=Mus musculus OX=10090 GN=Daam1 PE=1 SV=4	1	2	1	123.3	962.8	373.2	513	12.1	1283.7
High	Q6P9Q4	FH1/FH2 domain-containing protein 1 OS=Mus musculus OX=10090 GN=Fhod1 PE=1 SV=3	1	1	1	129.5	19.9	28.4	34.6	9.6	16.4	12.7
High	P05627	Transcription factor Jun OS=Mus musculus OX=10090 GN=Jun PE=1 SV=3	1	1	1	35.9	11.6	9.8	20.9	111.6	35.1	181.1
High	Q9ES56	Trafficking protein particle complex subunit 4 OS=Mus musculus OX=10090 GN=Trappc4 PE=1 SV=1	1	1	1	24.4
High	P47739	Aldehyde dehydrogenase, dimeric NADP-preferring OS=Mus musculus OX=10090 GN=Aldh3a1 PE=1 SV=2	1	2	1	50.4	8.2	202.9	768.2	7.8	16	20.1
High	Q99P72	Reticulon-4 OS=Mus musculus OX=10090 GN=Rtn4 PE=1 SV=2	1	1	1	126.5
High	Q5EG47	5'-AMP-activated protein kinase catalytic subunit alpha-1 OS=Mus musculus OX=10090 GN=Prkaa1 PE=1 SV=2	1	2	1	63.9
High	Q8CIG8	Protein arginine N-methyltransferase 5 OS=Mus musculus OX=10090 GN=Prmt5 PE=1 SV=3	1	1	1	72.6	43.8	58.5	73.8	18	25.5	28.4
High	Q9D8N2	DENN domain-containing protein 10 OS=Mus musculus OX=10090 GN=Dennd10 PE=1 SV=2	1	1	1	40.4
High	P84750	Ig kappa chain V region Mem5 (Fragment) OS=Mus musculus OX=10090 PE=1 SV=1	1	1	1	13.2	170.6	148.1	167.5	158.3	155.7	122.6
High	Q921L3	Calcium load-activated calcium channel OS=Mus musculus OX=10090 GN=Tmco1 PE=1 SV=1	1	1	1	21.2
High	Q66GT5	Phosphatidylglycerophosphatase and protein-tyrosine phosphatase 1 OS=Mus musculus OX=10090 GN=Ptpmt1 PE=1 SV=1	1	1	1	21.9
High	Q8K310	Matrin-3 OS=Mus musculus OX=10090 GN=Matr3 PE=1 SV=1	1	1	1	94.6	35	23.5	33.4	7.4	6	8.6
High	Q9D6R2	Isocitrate dehydrogenase [NAD] subunit alpha, mitochondrial OS=Mus musculus OX=10090 GN=Idh3a PE=1 SV=1	1	1	1	39.6
High	P23298	Protein kinase C eta type OS=Mus musculus OX=10090 GN=Prkch PE=1 SV=2	1	1	1	77.9	87.4	121.7	126.1	5.6	5.9	4.5
High	Q9CZU4	GTPase Era, mitochondrial OS=Mus musculus OX=10090 GN=Eral1 PE=2 SV=1	1	1	1	48.2
High	P62892	60S ribosomal protein L39 OS=Mus musculus OX=10090 GN=Rpl39 PE=1 SV=2	1	1	1	6.4
High	Q09PK2	Retroviral-like aspartic protease 1 OS=Mus musculus OX=10090 GN=Asprv1 PE=1 SV=1	1	1	1	37.2	89	48.7	150.5	70.1	59.6	115.1
High	Q921V5	Alpha-1,6-mannosyl-glycoprotein 2-beta-N-acetylglucosaminyltransferase OS=Mus musculus OX=10090 GN=Mgat2 PE=1 SV=1	1	1	1	51
High	Q9D8U8	Sorting nexin-5 OS=Mus musculus OX=10090 GN=Snx5 PE=1 SV=1	1	1	1	46.8	27.1	31.2	54.5	12.8	9.4	11.2
Medium	Q7TMK6	Protein Hook homolog 2 OS=Mus musculus OX=10090 GN=Hook2 PE=1 SV=3	1	1	1	83.3	5.7	59.8	443.1	3.7		6
Medium	Q6ZQ82	Rho GTPase-activating protein 26 OS=Mus musculus OX=10090 GN=Arhgap26 PE=1 SV=3	1	1	1	92
Medium	P56382	ATP synthase subunit epsilon, mitochondrial OS=Mus musculus OX=10090 GN=Atp5f1e PE=1 SV=2	1	1	1	5.8
Medium	Q99LI2	Chloride channel CLIC-like protein 1 OS=Mus musculus OX=10090 GN=Clcc1 PE=1 SV=1	1	2	1	60.6	129	81.6	291.5	72.1	563.6	485
Medium	Q9CPX7	28S ribosomal protein S16, mitochondrial OS=Mus musculus OX=10090 GN=Mrps16 PE=1 SV=1	1	1	1	15.2
Medium	P29595	NEDD8 OS=Mus musculus OX=10090 GN=Nedd8 PE=1 SV=2	1	1	1	9
Medium	Q9ES97	Reticulon-3 OS=Mus musculus OX=10090 GN=Rtn3 PE=1 SV=2	1	1	1	103.8	38	33.7	85.8	46.8	29.3	57.1
Medium	Q9DCZ1	GMP reductase 1 OS=Mus musculus OX=10090 GN=Gmpr PE=1 SV=1	1	1	1	37.5	229.2	246.5	487.9	19.9	10.1	20.7
Medium	Q05793	Basement membrane-specific heparan sulfate proteoglycan core protein OS=Mus musculus OX=10090 GN=Hspg2 PE=1 SV=1	1	1	1	398	15.6	27.4	31.2	156.2	34.1	84.6
Medium	P03975	IgE-binding protein OS=Mus musculus OX=10090 GN=Iap PE=2 SV=1	1	1	1	62.7
Medium	Q69ZT1	Fanconi-associated nuclease 1 OS=Mus musculus OX=10090 GN=Fan1 PE=2 SV=2	1	1	1	112.9
Medium	Q9DCX2	ATP synthase subunit d, mitochondrial OS=Mus musculus OX=10090 GN=Atp5pd PE=1 SV=3	1	1	1	18.7
Medium	O88667	GTP-binding protein RAD OS=Mus musculus OX=10090 GN=Rrad PE=1 SV=1	1	1	1	33.3
Medium	Q69ZR2	E3 ubiquitin-protein ligase HECTD1 OS=Mus musculus OX=10090 GN=Hectd1 PE=1 SV=2	1	1	1	289.9
Medium	Q9Z2N8	Actin-like protein 6A OS=Mus musculus OX=10090 GN=Actl6a PE=1 SV=2	1	1	1	47.4	72.5	76	119.4	25.2	27.1	27.7
Medium	O35526	Syntaxin-1A OS=Mus musculus OX=10090 GN=Stx1a PE=1 SV=3	1	1	1	33	16.6	8.2	20.5	34.3	132.8	63.8
Medium	Q3UCQ1	Forkhead box protein K2 OS=Mus musculus OX=10090 GN=Foxk2 PE=1 SV=3	1	1	1	68.4
Medium	Q9R0A5	Serine/threonine-protein kinase Nek3 OS=Mus musculus OX=10090 GN=Nek3 PE=1 SV=2	1	1	1	57.4
Medium	P61406	Telomerase-binding protein EST1A OS=Mus musculus OX=10090 GN=Smg6 PE=1 SV=1	1	1	1	160.4
Medium	Q80WC3	Trinucleotide repeat-containing gene 18 protein OS=Mus musculus OX=10090 GN=Tnrc18 PE=1 SV=2	1	1	1	307.4	29.7	11	17.6	151.2	86.7	487.2
Medium	P52624	Uridine phosphorylase 1 OS=Mus musculus OX=10090 GN=Upp1 PE=1 SV=2	1	1	1	34.1
Medium	P62715	Serine/threonine-protein phosphatase 2A catalytic subunit beta isoform OS=Mus musculus OX=10090 GN=Ppp2cb PE=1 SV=1	1	2	1	35.6
Medium	Q9ERA6	Tuftelin-interacting protein 11 OS=Mus musculus OX=10090 GN=Tfip11 PE=1 SV=1	1	1	1	96.2
Medium	Q9Z277	Tyrosine-protein kinase BAZ1B OS=Mus musculus OX=10090 GN=Baz1b PE=1 SV=2	1	1	1	170.5
Medium	Q9QZI9	Serine incorporator 3 OS=Mus musculus OX=10090 GN=Serinc3 PE=1 SV=2	1	1	1	52.6
Medium	P23780	Beta-galactosidase OS=Mus musculus OX=10090 GN=Glb1 PE=1 SV=1	1	1	1	73.1
Medium	P10518	Delta-aminolevulinic acid dehydratase OS=Mus musculus OX=10090 GN=Alad PE=1 SV=1	1	1	1	36
Medium	Q9JM90	Signal-transducing adaptor protein 1 OS=Mus musculus OX=10090 GN=Stap1 PE=1 SV=1	1	1	1	34.6	3.6	4.5	4.5	30.2	31.5	45.6
Medium	Q8CGY8	UDP-N-acetylglucosamine--peptide N-acetylglucosaminyltransferase 110 kDa subunit OS=Mus musculus OX=10090 GN=Ogt PE=1 SV=2	1	1	1	116.9
Medium	Q8CFI5	Probable proline--tRNA ligase, mitochondrial OS=Mus musculus OX=10090 GN=Pars2 PE=1 SV=2	1	1	1	53.5
Medium	E9Q401	Ryanodine receptor 2 OS=Mus musculus OX=10090 GN=Ryr2 PE=1 SV=1	1	1	1	564.5	117.4	90.9	309.1	122.8	56.1	78.5
Medium	Q8C5N3	Pre-mRNA-splicing factor CWC22 homolog OS=Mus musculus OX=10090 GN=Cwc22 PE=1 SV=1	1	1	1	104.7
Medium	Q9QYM8	Centromere protein H OS=Mus musculus OX=10090 GN=Cenph PE=1 SV=1	1	1	1	28.1
Medium	Q9Z0V8	Mitochondrial import inner membrane translocase subunit Tim17-A OS=Mus musculus OX=10090 GN=Timm17a PE=1 SV=1	1	1	1	18.1
Medium	Q9WTL7	Acyl-protein thioesterase 2 OS=Mus musculus OX=10090 GN=Lypla2 PE=1 SV=1	1	1	1	24.8
Medium	Q3ULJ0	Glycerol-3-phosphate dehydrogenase 1-like protein OS=Mus musculus OX=10090 GN=Gpd1l PE=1 SV=2	1	1	1	38.2
Medium	Q91ZA3	Propionyl-CoA carboxylase alpha chain, mitochondrial OS=Mus musculus OX=10090 GN=Pcca PE=1 SV=2	1	1	1	79.9
Medium	Q8BH58	TIP41-like protein OS=Mus musculus OX=10090 GN=Tiprl PE=1 SV=1	1	1	1	31.2
Medium	Q6PAJ1	Breakpoint cluster region protein OS=Mus musculus OX=10090 GN=Bcr PE=1 SV=3	1	1	1	143	18.3	32.2	38.2	66.4	35.6	36.1
[truncated: 133 more rows]
